# Supplementary material for: Global molecular landscape of early MASLD progression in human obesity
Source: eLife. 2026 Mar 23;14:RP109534. doi: 10.7554/eLife.109534 (PMC13008360; doi:10.7554/eLife.109534)
Supplement: Supplementary file 2. [file elife-109534-supp2.xlsx]

## Sheet: Sheet1
	GOterm	Function	HypergeoPval	GOterm_size	GOterm_inbg_size	Proportion	DE_GO_size	Background_size	DE_size	DE_genes
PC1	GO:0044281	small molecule metabolic process	0	1450	1144	0.788966	445	11770	3092	AADAT;ABCB11;ABCB4;ABCC1;ABCG2;ABCG5;ABCG8;ACAA1;ACACB;ACADL;ACADM;ACADS;ACADSB;ACAT1;ACMSD;ACOX1;ACOX2;ACSL1;ACSL4;ACSM2B;ACY1;ACY3;ADA;ADH1A;ADH1B;ADH1C;ADH4;ADH6;ADHFE1;ADI1;ADK;AFMID;AGL;AGMAT;AGPAT2;AGT;AGXT;AGXT2;AHCY;AK2;AKR1C4;AKR1D1;AKR7A2;AKR7A3;AKR7L;ALAD;ALAS1;ALB;ALDH1A1;ALDH2;ALDH4A1;ALDH6A1;ALDH7A1;ALDH9A1;ALDOB;AMACR;AMDHD1;AOX1;APOA1;APOA2;APOA5;APOB;APOC2;APOC3;APOE;APRT;ARF1;AR…
	GO:0055114	oxidation-reduction process	6.66134e-16	571	422	0.739054	186	11770	3092	ACADL;ACADM;ADHFE1;ADI1;AGMO;AIFM1;AKR1A1;AKR1C4;AKR1D1;AKR7A2;AKR7A3;AKR7L;ALDH1B1;ALDH1L1;ALDH3A2;ALDH4A1;ALDH6A1;ALDH7A1;ALDH8A1;ALDH9A1;ALKBH7;AOX1;ASPDH;BBOX1;BCKDHB;BCO2;BDH1;BLVRB;BMP2;CBR1;CBR4;CCS;CDO1;CHDH;CP;CRYL1;CRYM;CRYZ;CTBP2;CYB5A;CYP1A2;CYP26A1;CYP27A1;CYP2A6;CYP2B6;CYP2C18;CYP2C8;CYP2C9;CYP2E1;CYP2J2;CYP39A1;CYP3A4;CYP4A11;CYP4A22;CYP4F11;CYP4F12;CYP4F2;CYP4F3;CYP8B1;DAO;DCXR;DD…
	GO:0006805	xenobiotic metabolic process	4.26115e-12	158	122	0.772152	68	11770	3092	ACSM2B;ACY1;ACY3;ADH1A;ADH1B;ADH1C;ADH4;ADH6;AHCY;AKR7A2;AKR7A3;AKR7L;ALDH1A1;ALDH2;COMT;CYP1A2;CYP26A1;CYP27A1;CYP2A6;CYP2B6;CYP2C18;CYP2C8;CYP2C9;CYP2E1;CYP2J2;CYP39A1;CYP3A4;CYP4A11;CYP4F11;CYP4F12;CYP4F2;CYP4F3;CYP8B1;EPHX2;FDX1;FDXR;FMO3;GLYAT;GSTA1;GSTA2;GSTZ1;HNF4A;MAOA;MAOB;MAT1A;MGST1;MGST2;MTR;NAT1;NAT2;NR1I2;OPLAH;RORC;SLC26A1;SLC35D1;SULT1A1;SULT1A2;SULT1B1;SULT1E1;SULT2A1;TPMT;UGP2;U…
	GO:0034641	cellular nitrogen compound metabolic process	2.40117e-08	187	156	0.834225	73	11770	3092	AADAT;ACADSB;ACAT1;ACMSD;ADI1;AFMID;AGMAT;AGXT;AGXT2;AHCY;ALDH4A1;ALDH6A1;ALDH7A1;ALDH9A1;AMDHD1;ARG1;ASL;ASNS;ASS1;AUH;BBOX1;BCKDHB;BHMT;CDO1;CKB;CPS1;DAO;DBT;DDC;DIO1;DLST;FAH;FTCD;GAMT;GATM;GCDH;GLS;GLS2;GLUD1;GOT1;GOT2;GPT;GRHPR;GSTZ1;HAAO;HAL;HAO1;HGD;HIBADH;HIBCH;HPD;HSD17B10;IVD;IYD;MAT1A;MCCC1;MCCC2;MTR;NAGS;OTC;PAH;PCBD1;PSMD11;PSMD7;QDPR;SHMT1;SLC25A10;SLC25A15;SUOX;TDO2;TMLHE;TST;UROC1
	GO:0008380	RNA splicing	3.06785e-08	238	214	0.89916	93	11770	3092	ACIN1;AKAP17A;ARL6IP4;BCAS2;CASC3;CCAR1;CD2BP2;CPSF7;DDX39B;DHX15;DHX38;DHX9;EIF4A3;ESRP2;FUS;GTF2F1;GTF2F2;HNRNPA0;HNRNPA1;HNRNPA1L2;HNRNPA3;HNRNPD;HNRNPH1;HNRNPH3;HNRNPK;HNRNPR;HNRNPU;HNRNPUL1;IVNS1ABP;JMJD6;KHSRP;LGALS3;LUC7L3;MBNL3;MPHOSPH10;NONO;NSRP1;PABPN1;PAPOLA;PCBP1;PCF11;PLRG1;POLR2B;POLR2E;PPP2R1A;PRPF3;PRPF38A;PRPF38B;PRPF4;PRPF4B;PRPF8;PTBP1;PTBP3;RBFOX2;RBM10;RBM15B;RBM25;RBM28;RBM…
	GO:0044237	cellular metabolic process	1.18148e-07	131	111	0.847328	55	11770	3092	ADHFE1;COX5A;COX5B;COX6A1;COX6B1;COX6C;COX8A;CS;CYC1;DLST;ETFA;ETFB;ETFDH;FH;IDH2;L2HGDH;MDH2;MPC1;MPC2;NDUFA10;NDUFA11;NDUFA2;NDUFA4;NDUFA5;NDUFA7;NDUFA8;NDUFB1;NDUFB10;NDUFB11;NDUFB2;NDUFB3;NDUFB5;NDUFB6;NDUFB7;NDUFS3;NDUFS4;NDUFS7;NDUFS8;NDUFV1;NDUFV2;NNT;PDHB;PDK2;PDP1;PDPR;SDHA;SDHB;SDHC;SDHD;SUCLG1;SUCLG2;UQCR10;UQCR11;UQCRC1;UQCRQ
	GO:0008206	bile acid metabolic process	2.18666e-07	40	33	0.825	23	11770	3092	ABCB11;ACAA1;ACOX2;AKR1C4;AKR1D1;ALB;AMACR;ARV1;BAAT;CYP27A1;CYP39A1;CYP8B1;HSD17B4;HSD3B7;NCOA1;NR1H4;NR5A2;SCP2;SLC10A1;SLC27A2;SLC27A5;SLCO1B1;SLCO1B3
	GO:0044255	cellular lipid metabolic process	5.38886e-07	150	129	0.86	60	11770	3092	ABCB4;ACAA1;ACACB;ACADL;ACADM;ACADS;ACAT1;ACOX1;ACOX2;ACSL1;ACSL4;AGPAT2;AGT;ALAS1;AMACR;APOA1;APOA2;APOA5;BDH1;CPT2;CRAT;CREBBP;CROT;CYP4A11;DECR1;DGAT1;DGAT2;ECHS1;ECI1;ELOVL2;FABP1;FAR1;GLIPR1;GPAM;GPD1;HACD2;HADH;HADHA;HADHB;HMGCL;HMGCS2;HSD17B4;IDH1;MCEE;MED1;MLYCD;NCOA1;NR1H2;PCCA;PCCB;PEX11A;PHYH;SCP2;SIN3B;SLC25A1;SLC25A20;SLC27A2;SULT2A1;TECR;UGT1A9
	GO:0006635	fatty acid beta-oxidation	5.86904e-07	37	32	0.864865	22	11770	3092	ABCD3;ACAA1;ACADL;ACADM;ACADS;CPT2;CROT;DECR1;ECH1;ECHS1;ECI1;ECI2;EHHADH;HADH;HADHA;HADHB;HSD17B4;MCEE;PCCA;PCCB;SESN2;SLC27A2
	GO:0017144	drug metabolic process	8.02207e-07	29	26	0.896552	19	11770	3092	ADH1A;CBR1;CYP1A2;CYP2A6;CYP2B6;CYP2C8;CYP2C9;CYP2E1;CYP3A4;CYP4F12;CYP4F2;EPHX2;FMO3;FMO4;FMO5;NT5C2;PCK1;UGT1A1;VKORC1
	GO:0030968	endoplasmic reticulum unfolded protein response	1.75339e-06	103	91	0.883495	45	11770	3092	ARFGAP1;ASNS;ATF4;ATP6V0D1;CALR;CREB3L2;CREB3L3;CXCL8;CXXC1;DCTN1;DDIT3;DERL2;DNAJB11;DNAJB9;DNAJC3;EDEM1;EIF2AK3;FKBP14;GFPT1;GOSR2;GSK3A;HERPUD1;HSP90B1;HSPA5;HYOU1;IGFBP1;MBTPS2;NFE2L2;PDIA6;PPP1R15A;PTPN1;SEC31A;SEC61A1;SEC61G;SEC63;SERP1;SHC1;SRPRB;TATDN2;TLN1;TSPYL2;VCP;WFS1;YIF1A;ZBTB17
	GO:0006958	complement activation, classical pathway	2.0387e-06	51	27	0.529412	19	11770	3092	C1R;C1RL;C1S;C2;C3;C4A;C4BPA;C4BPB;C5;C6;C8A;C8B;C8G;C9;CFI;CLU;MASP2;MBL2;SERPING1
	GO:0022904	respiratory electron transport chain	2.33915e-06	100	81	0.81	41	11770	3092	ALDH5A1;COX5A;COX5B;COX6A1;COX6B1;COX6C;COX8A;CYC1;ETFA;ETFB;ETFDH;NDUFA10;NDUFA11;NDUFA2;NDUFA4;NDUFA5;NDUFA7;NDUFA8;NDUFB1;NDUFB10;NDUFB11;NDUFB2;NDUFB3;NDUFB5;NDUFB6;NDUFB7;NDUFS3;NDUFS4;NDUFS7;NDUFS8;NDUFV1;NDUFV2;PINK1;SDHA;SDHB;SDHC;SDHD;UQCR10;UQCR11;UQCRC1;UQCRQ
	GO:0070328	triglyceride homeostasis	2.4833e-06	25	21	0.84	16	11770	3092	ACSM2A;ANGPTL3;APOA1;APOA5;APOC2;APOC3;APOC4;HNF4A;LIPC;MED13;MIA2;MLXIPL;NR1H3;PLA2G12B;SCARB1;SESN2
	GO:0006397	mRNA processing	4.49964e-06	168	133	0.791667	59	11770	3092	A1CF;ACIN1;AKAP17A;ALKBH5;ARL6IP4;CASC3;DHX15;ESRP2;FIP1L1;HNRNPA0;HNRNPA1;HNRNPA1L2;HNRNPLL;HNRNPR;JMJD6;KHDRBS1;KHSRP;LGALS3;MBNL3;NONO;NSRP1;PAN3;PRPF3;PRPF38A;PRPF38B;PRPF8;PTBP1;PTBP3;RBFOX2;RBM10;RBM15B;RBM23;RBM25;RBM26;RBM27;RBM28;RBM39;RBM4;SCAF1;SCAF8;SF3A1;SF3B2;SF3B3;SFPQ;SFSWAP;SNRNP25;SON;SREK1;SRSF1;SRSF4;THOC1;THOC5;THOC6;U2AF2;WTAP;XRN2;ZNF326;ZPR1;ZRANB2
	GO:0036498	IRE1-mediated unfolded protein response	6.02981e-06	56	52	0.928571	29	11770	3092	ARFGAP1;ATP6V0D1;CXXC1;DCTN1;DNAJB11;DNAJB9;DNAJC3;EDEM1;FKBP14;GFPT1;GOSR2;GSK3A;HSPA5;HYOU1;PDIA6;PTPN1;SEC31A;SEC61A1;SEC61G;SEC63;SERP1;SHC1;SRPRB;TATDN2;TLN1;TSPYL2;WFS1;YIF1A;ZBTB17
	GO:0006699	bile acid biosynthetic process	7.29761e-06	21	18	0.857143	14	11770	3092	ABCB11;ACOX2;AKR1C4;AKR1D1;AMACR;BAAT;CYP27A1;CYP39A1;CYP8B1;HSD17B4;HSD3B7;SCP2;SLC27A2;SLC27A5
	GO:0042730	fibrinolysis	7.29761e-06	21	18	0.857143	14	11770	3092	CPB2;F12;F2;FGA;FGB;FGG;HRG;KLKB1;PLAUR;PLG;PROS1;SERPINF2;SERPING1;TMPRSS6
	GO:0010951	negative regulation of endopeptidase activity	1.53043e-05	143	75	0.524476	37	11770	3092	AGT;AHSG;AMBP;BIRC6;C3;C4A;C5;CRIM1;CST3;FETUB;HRG;ITIH1;ITIH2;ITIH3;ITIH4;KNG1;LPA;NGF;PEBP1;PROS1;SERPINA1;SERPINA10;SERPINA11;SERPINA3;SERPINA4;SERPINA5;SERPINA6;SERPINA7;SERPINC1;SERPIND1;SERPINF1;SERPINF2;SERPING1;SERPINH1;SLPI;SPP2;VTN
	GO:0030449	regulation of complement activation	1.70649e-05	25	23	0.92	16	11770	3092	C2;C3;C4A;C4BPA;C4BPB;C5;C6;C8A;C8B;C8G;C9;CFB;CFH;CFI;PROS1;VTN
PC2	GO:0000184	nuclear-transcribed mRNA catabolic process, nonsense-mediated decay	0	118	115	0.974576	84	11770	2113	CTIF;EIF3E;ETF1;FAU;GSPT1;PARN;RPL10;RPL10A;RPL11;RPL12;RPL13;RPL13A;RPL14;RPL15;RPL17;RPL18;RPL18A;RPL19;RPL21;RPL22;RPL23;RPL23A;RPL24;RPL26;RPL27;RPL27A;RPL28;RPL29;RPL3;RPL30;RPL31;RPL32;RPL34;RPL35;RPL35A;RPL36;RPL36A;RPL37;RPL37A;RPL38;RPL39;RPL41;RPL5;RPL7;RPL7A;RPL8;RPL9;RPLP1;RPLP2;RPS10;RPS11;RPS12;RPS13;RPS14;RPS15;RPS15A;RPS16;RPS17;RPS18;RPS19;RPS2;RPS20;RPS21;RPS23;RPS24;RPS25;RPS27…
	GO:0006412	translation	0	231	212	0.917749	99	11770	2113	AKT1;EEF1A1;EEF1B2;EEF1D;EEF1G;EIF3A;EIF3E;EIF3H;EIF3K;EIF5;ETF1;FAU;HBS1L;MRPL41;MRPL43;MRPS21;MRPS24;NACA;RBM3;RPL10;RPL10A;RPL11;RPL12;RPL13;RPL13A;RPL14;RPL15;RPL17;RPL18;RPL18A;RPL19;RPL21;RPL22;RPL23;RPL23A;RPL24;RPL26;RPL27;RPL27A;RPL28;RPL29;RPL3;RPL30;RPL31;RPL32;RPL34;RPL35;RPL35A;RPL36;RPL36A;RPL36AL;RPL37;RPL37A;RPL38;RPL39;RPL41;RPL5;RPL7;RPL7A;RPL8;RPL9;RPLP1;RPLP2;RPS10;RPS11;RPS12…
	GO:0006413	translational initiation	0	137	130	0.948905	84	11770	2113	DHX29;EIF1;EIF3A;EIF3E;EIF3H;EIF3K;EIF4G2;EIF4G3;EIF5;FAU;LARP1;RPL10;RPL10A;RPL11;RPL12;RPL13;RPL13A;RPL14;RPL15;RPL17;RPL18;RPL18A;RPL19;RPL21;RPL22;RPL23;RPL23A;RPL24;RPL26;RPL27;RPL27A;RPL28;RPL29;RPL3;RPL30;RPL31;RPL32;RPL34;RPL35;RPL35A;RPL36;RPL36A;RPL37;RPL37A;RPL38;RPL39;RPL41;RPL5;RPL7;RPL7A;RPL8;RPL9;RPLP1;RPLP2;RPS10;RPS11;RPS12;RPS13;RPS14;RPS15;RPS15A;RPS16;RPS17;RPS18;RPS19;RPS2;RP…
	GO:0006414	translational elongation	0	95	91	0.957895	80	11770	2113	EEF1A1;EEF1B2;EEF1D;EEF1G;FAU;HBS1L;RPL10;RPL10A;RPL11;RPL12;RPL13;RPL13A;RPL14;RPL15;RPL17;RPL18;RPL18A;RPL19;RPL21;RPL22;RPL23;RPL23A;RPL24;RPL26;RPL27;RPL27A;RPL28;RPL29;RPL3;RPL30;RPL31;RPL32;RPL34;RPL35;RPL35A;RPL36;RPL36A;RPL37;RPL37A;RPL38;RPL39;RPL41;RPL5;RPL7;RPL7A;RPL8;RPL9;RPLP1;RPLP2;RPS10;RPS11;RPS12;RPS13;RPS14;RPS15;RPS15A;RPS16;RPS17;RPS18;RPS19;RPS2;RPS20;RPS21;RPS23;RPS24;RPS25;…
	GO:0006415	translational termination	0	84	82	0.97619	75	11770	2113	ETF1;FAU;RPL10;RPL10A;RPL11;RPL12;RPL13;RPL13A;RPL14;RPL15;RPL17;RPL18;RPL18A;RPL19;RPL21;RPL22;RPL23;RPL23A;RPL24;RPL26;RPL27;RPL27A;RPL28;RPL29;RPL3;RPL30;RPL31;RPL32;RPL34;RPL35;RPL35A;RPL36;RPL36A;RPL37;RPL37A;RPL38;RPL39;RPL41;RPL5;RPL7;RPL7A;RPL8;RPL9;RPLP1;RPLP2;RPS10;RPS11;RPS12;RPS13;RPS14;RPS15;RPS15A;RPS16;RPS17;RPS18;RPS19;RPS2;RPS20;RPS21;RPS23;RPS24;RPS25;RPS27;RPS27A;RPS28;RPS29;RP…
	GO:0006614	SRP-dependent cotranslational protein targeting to membrane	0	107	104	0.971963	78	11770	2113	FAU;RPL10;RPL10A;RPL11;RPL12;RPL13;RPL13A;RPL14;RPL15;RPL17;RPL18;RPL18A;RPL19;RPL21;RPL22;RPL23;RPL23A;RPL24;RPL26;RPL27;RPL27A;RPL28;RPL29;RPL3;RPL30;RPL31;RPL32;RPL34;RPL35;RPL35A;RPL36;RPL36A;RPL37;RPL37A;RPL38;RPL39;RPL41;RPL5;RPL7;RPL7A;RPL8;RPL9;RPLP1;RPLP2;RPS10;RPS11;RPS12;RPS13;RPS14;RPS15;RPS15A;RPS16;RPS17;RPS18;RPS19;RPS2;RPS20;RPS21;RPS23;RPS24;RPS25;RPS27;RPS27A;RPS28;RPS29;RPS3;RP…
	GO:0019058	viral life cycle	0	144	138	0.958333	88	11770	2113	CHMP2A;FAU;FURIN;KPNA1;NEDD4L;NUP107;NUP153;NUP50;NUP62;PDCD6IP;RANBP2;RPL10;RPL10A;RPL11;RPL12;RPL13;RPL13A;RPL14;RPL15;RPL17;RPL18;RPL18A;RPL19;RPL21;RPL22;RPL23;RPL23A;RPL24;RPL26;RPL27;RPL27A;RPL28;RPL29;RPL3;RPL30;RPL31;RPL32;RPL34;RPL35;RPL35A;RPL36;RPL36A;RPL37;RPL37A;RPL38;RPL39;RPL41;RPL5;RPL7;RPL7A;RPL8;RPL9;RPLP1;RPLP2;RPS10;RPS11;RPS12;RPS13;RPS14;RPS15;RPS15A;RPS16;RPS17;RPS18;RPS19;…
	GO:0019083	viral transcription	0	109	105	0.963303	79	11770	2113	FAU;NUP107;NUP153;NUP50;NUP62;RANBP2;RPL10;RPL10A;RPL11;RPL12;RPL13;RPL13A;RPL14;RPL15;RPL17;RPL18;RPL18A;RPL19;RPL21;RPL22;RPL23;RPL23A;RPL24;RPL26;RPL27;RPL27A;RPL28;RPL29;RPL3;RPL30;RPL31;RPL32;RPL34;RPL35;RPL35A;RPL36;RPL36A;RPL37;RPL37A;RPL38;RPL39;RPL41;RPL5;RPL7;RPL7A;RPL8;RPL9;RPLP1;RPLP2;RPS10;RPS11;RPS12;RPS13;RPS14;RPS15;RPS15A;RPS16;RPS17;RPS18;RPS19;RPS2;RPS20;RPS21;RPS23;RPS24;RPS25…
	GO:0016032	viral process	8.54872e-15	559	502	0.898032	160	11770	2113	ANKRD17;AP1B1;AP1G1;AP1M1;AP2A1;AP2A2;BRD4;CARM1;CCNA2;CD46;CHMP2A;CREB1;CUL2;CUL4A;CUL5;EIF4G3;EP300;ERCC3;F11R;FADD;FAU;FBLN1;FKBP8;FURIN;GADD45GIP1;GRB2;GTF2H5;HDAC1;IDE;IKBKG;IL6ST;ISG15;KCTD5;KDM4A;KPNA1;LDLR;LYN;MAPK1;MAVS;MFGE8;MSH6;NACA;NCKAP1;NEDD4L;NMT1;NUP107;NUP153;NUP50;NUP62;PAK2;PDCD6IP;PDZD8;POLR2H;POLR2K;PSMC1;PSMC2;PSMD1;PSMD11;PSMD12;PSMD2;PSMD3;PSMD5;PSME3;PVR;RAD50;RANBP2;RBX…
	GO:0044267	cellular protein metabolic process	3.27832e-09	637	523	0.821036	147	11770	2113	ADAMTS13;ASNS;B4GALT1;CCT3;CETN2;CMAS;CPE;CTDSP2;DNAJC19;DPM3;EDEM3;EEF1A1;EEF1B2;EEF1D;EEF1G;EIF3A;EIF3E;EIF3H;EIF3K;EIF5;ETF1;EXOC2;EXOC5;EXOC7;EXTL3;FAU;FURIN;GALNT1;GALNT2;GALNT4;GANAB;GLB1;GNE;HSPA9;IGFBP5;IGFBP6;MAN1A1;MAN1A2;MAN2A1;MAN2A2;MBTPS1;MOGS;NUP107;NUP153;NUP50;NUP62;PARP1;PFDN5;PIAS4;PIGP;POMC;RAB27A;RANBP2;RNF168;RPL10;RPL10A;RPL11;RPL12;RPL13;RPL13A;RPL14;RPL15;RPL17;RPL18;RPL1…
	GO:0002181	cytoplasmic translation	9.02855e-09	21	21	1	16	11770	2113	RPL15;RPL17;RPL22;RPL22L1;RPL26;RPL27A;RPL29;RPL30;RPL31;RPL35A;RPL36;RPL36A;RPL7;RPL7L1;RPL8;RPL9
	GO:0010467	gene expression	6.95708e-08	854	736	0.861827	188	11770	2113	ADAR;AGO1;AGO4;AKT1;ANP32A;BCAS2;CCNC;CDC40;CNOT11;COX4I1;COX7C;COX8A;CPSF2;CRCP;CWC15;CYCS;DDX23;DICER1;EEF1A1;EEF1B2;EEF1D;EEF1G;EIF3A;EIF3E;EIF3H;EIF3K;EIF5;ELAVL1;ERCC3;ETF1;FAU;GOLPH3;GSR;GTF2H5;GTF3C3;GTF3C5;HDAC1;IARS2;IPO8;LAMTOR4;LARS2;LSM3;LSM5;LSM7;MAPK14;MED14;MED30;MEN1;MTOR;NEDD4L;NOTCH2;NR2C2;NR3C1;NR4A1;NUP107;NUP153;NUP50;NUP62;PAPOLA;PARN;PARP1;PLD6;POLR1D;POLR2H;POLR2K;POLR3A;P…
	GO:0042274	ribosomal small subunit biogenesis	6.78135e-05	13	13	1	9	11770	2113	RPS15;RPS16;RPS17;RPS19;RPS21;RPS24;RPS28;RPS6;RPS7
	GO:0046827	positive regulation of protein export from nucleus	0.000264868	15	12	0.8	8	11770	2113	ANP32B;CAMK1;EMD;GSK3B;PPM1A;PRKACA;TCF7L2;XPO4
	GO:0050918	positive chemotaxis	0.000864479	34	26	0.764706	12	11770	2113	BMP4;CXCL12;HMGB2;MET;MIF;NTF3;PTPRJ;SAA1;SAA2;SEMA5A;VEGFB;VEGFC
	GO:0048011	neurotrophin TRK receptor signaling pathway	0.00090626	394	297	0.753807	75	11770	2113	ADAM17;ADCY9;AGO1;AGO4;AKT1;AP2A1;AP2A2;ARHGEF11;ARHGEF12;ARHGEF7;BAD;CAMK2G;CHUK;CREB1;CRK;CRKL;DNAL4;DUSP3;EGFR;FGFR1;FGFR2;FRS2;FURIN;GRB2;GSK3B;HDAC1;IRAK1;IRS2;ITPR2;ITSN1;KRAS;MAPK1;MAPK14;MAPK8;MTOR;MYD88;NDN;NGF;NR4A1;PCSK6;PHLPP2;PIK3CA;PIK3CB;PPP2R5D;PRKACA;PRKAR2A;PRKAR2B;PRKCA;PSEN2;PSMC1;PSMC2;PSMD1;PSMD11;PSMD12;PSMD2;PSMD3;PSMD5;PSME3;PTPN11;RALB;RAP1A;RAPGEF1;RAPGEF2;RASGRP4;RBX1;…
	GO:0010820	positive regulation of T cell chemotaxis	0.000948088	11	6	0.545455	5	11770	2113	ADAM10;ADAM17;TMEM102;TNFSF14;XCL2
	GO:0060445	branching involved in salivary gland morphogenesis	0.000948088	11	6	0.545455	5	11770	2113	DAG1;FGFR1;FGFR2;SHH;TGM2
	GO:0090557	establishment of endothelial intestinal barrier	0.000948088	7	6	0.857143	5	11770	2113	F11R;RAP2C;RAPGEF2;TJP1;TJP2
	GO:0008637	apoptotic mitochondrial changes	0.00115209	21	17	0.809524	9	11770	2113	AKT1;BID;DAP3;GCLC;GCLM;MCL1;NDUFS1;PPIF;SLC25A4
Top 20 enriched terms were listed.
* PC: principal components
