# Supplementary material for: Global molecular landscape of early MASLD progression in human obesity
Source: eLife. 2026 Mar 23;14:RP109534. doi: 10.7554/eLife.109534 (PMC13008360; doi:10.7554/eLife.109534)
Supplement: Supplementary file 3. [file elife-109534-supp3.xlsx]

## Sheet: Plasma
Compound	Class	ID	note	Lipid	Glycerolipids	name	super class (HMDB)	class (HMDB)	sub class (HMDB)	accession (HMDB)	name (HMDB)	core (LMSD)	main_class (LMSD)	sub_class (LMSD)	lm_id (LMSD)	name (LMSD)	abbrev (LMSD)	abbrev_chains (LMSD)	InChIKey	formula	MS_level	adduct	precursor_m/z	fragment_m/z	RT (library)	RT	detected_all	CoV_plasma	detected_plasma	nonzero_rate_plasma	coef_Histo_Steatosis	pval_Histo_Steatosis	qval_Histo_Steatosis	coef_Histo_Inflammation	pval_Histo_Inflammation	qval_Histo_Inflammation	coef_Histo_Ballooning	pval_Histo_Ballooning	qval_Histo_Ballooning	coef_Histo_Fibrosis	pval_Histo_Fibrosis	qval_Histo_Fibrosis	coef_Histo_NAS	pval_Histo_NAS	qval_Histo_NAS
TAG O-56:1	TAG-O	RP_PosMS1_1397		Y	GL	TG O-12:0_22:0_22:1 M+Na Atlas --- TG O-14:0_20:0_22:1 M+Na Atlas --- TG O-14:0_20:1_22:0 M+Na Atlas --- TG O-14:1_20:0_22:0 M+Na Atlas --- TG O-16:0_18:0_22:1 M+Na Atlas --- TG O-16:0_18:1_22:0 M+Na Atlas --- TG O-16:0_20:0_20:1 M+Na Atlas --- TG O-16:1_18:0_22:0 M+Na Atlas --- TG O-16:1_20:0_20:0 M+Na Atlas --- TG O-18:0_16:0_22:1 M+Na Atlas --- TG O-18:0_16:1_22:0 M+Na Atlas --- TG O-18:0_18:0…	Lipids and lipid-like molecules	Glycerolipids	Triradylcglycerols	HMDB0045762, HMDB0046480, HMDB0050375, HMDB0051458	TG(20:0/18:1(9Z)/O-18:0) --- TG(22:0/16:1(9Z)/O-18:0) --- TG(20:1(11Z)/18:0/O-18:0) --- TG(22:1(13Z)/16:0/O-18:0)								AHKGDMREJYJJCK-RFBIWTDZNA-N, BKHQIOZWOPXQLF-FSRJSHLRNA-N, BWEBSOREABGWNB-FLFQWRMENA-N, CIFZMDHXYYGBQC-RFBIWTDZNA-N, CUMVKFBVSQBASZ-FLFQWRMENA-N, CYYFZPJFLRWJPB-FLFQWRMENA-N, DNDQJEPSXBZSNW-FVDSYPCUNA-N, DXLAMQSKKMZWNP-RFBIWTDZNA-N, FBDOHMYZBNFGKA-FSRJSHLRNA-N, FCJCIOQPWKFFFN-RFBIWTDZNA-N, GWXLPRMFNYIIKT-LCUIJRPUNA-N, HQBBCXZYICBAKQ-RFBIWTDZNA-N, LFLULLQVQPKAMK-FLFQWRMENA-N, LSQPPKVWGWHSLC-SDXDJHT…	C59H114O5	1	M+Na	925.852		12.37	12.34	52.1505	12.2369	87.0229	100	0.577409	4.14705e-08	2.93417e-05	0.416689	0.00336245	0.923985	0.469606	0.0995394	0.765052	0.17064	0.143863	0.542199	0.286633	2.03491e-06	0.0013878
TAG 55:2	TAG	RP_PosMSMS_1380, 1392		Y	GL	TG 18:0_18:1_19:1 M+NH4 Atlas --- TG 18:1_18:1_19:0 M+NH4 Atlas, TG 18:1_18:1_19:0 M+Na Atlas						Glycerolipids [GL]	Triradylglycerols [GL03]	Triacylglycerols [GL0301]	LMGL03010377 --- LMGL03016144, LMGL03010377	TG(18:0/18:1(9Z)/19:1(9Z))[iso6] --- TG(18:1(9Z)/18:1(9Z)/19:0)[iso3], TG(18:1(9Z)/18:1(9Z)/19:0)[iso3]	TG 55:2	TG 18:0_18:1_19:1 --- TG 18:1_18:1_19:0, TG 18:1_18:1_19:0	FLDIHXYPYWYZFS-GEADDECUNA-N, MQDWFDVGTREOKJ-MIFGFRIJNA-N, MQDWFDVGTREOKJ-MIFGFRIJNA-N	C58H108O6	2, 1	M+NH4, M+Na	918.8419, 923.7968	619.568	11.575	11.515	51.6129	7.24227	69.4656	100	0.480808	5.63008e-06	0.00199173	0.242152	0.0874903	0.985013	0.549793	0.0492091	0.765052	0.115205	0.31699	0.654154	0.226277	0.000188327	0.0321097
TAG 55:1	TAG	RP_PosMSMS_1385		Y	GL	TG 18:0_18:1_19:0 M+NH4 Atlas						Glycerolipids [GL]	Triradylglycerols [GL03]	Triacylglycerols [GL0301]	LMGL03010334	TG(18:0/18:1(9Z)/19:0)[iso6]	TG 55:1	TG 18:0_18:1_19:0	NAOSZALBTBBMRV-IKPAITLHNA-N	C58H110O6	1	M+NH4	920.857		11.78	11.76	10.2151	18.7241	13.7405	100	0.437853	1.66431e-05	0.00392518	0.172677	0.203615	0.985013	0.369145	0.168993	0.765052	0.208212	0.0567085	0.442848	0.190325	0.0011102	0.108166
TAG O-58:2	TAG-O	RP_PosMS1_1446		Y	GL	TG O-14:0_22:0_22:2 M+Na Atlas --- TG O-14:0_22:1_22:1 M+Na Atlas --- TG O-14:1_22:0_22:1 M+Na Atlas --- TG O-16:0_20:0_22:2 M+Na Atlas --- TG O-16:0_20:1_22:1 M+Na Atlas --- TG O-16:0_20:2_22:0 M+Na Atlas --- TG O-16:1_20:0_22:1 M+Na Atlas --- TG O-16:1_20:1_22:0 M+Na Atlas --- TG O-16:2_20:0_22:0 M+Na Atlas --- TG O-18:0_18:0_22:2 M+Na Atlas --- TG O-18:0_18:1_22:1 M+Na Atlas --- TG O-18:0_18:2…	Lipids and lipid-like molecules	Glycerolipids	Triradylcglycerols	HMDB0046655, HMDB0050527, HMDB0051594, HMDB0053328, HMDB0054380	TG(22:0/18:2(9Z,12Z)/O-18:0) --- TG(20:1(11Z)/20:1(11Z)/O-18:0) --- TG(22:1(13Z)/18:1(9Z)/O-18:0) --- TG(20:2n6/20:0/O-18:0) --- TG(22:2(13Z,16Z)/18:0/O-18:0)								AQPGNAQHWQBMKT-XWAXDLMJNA-N, BMOVEZNYKLXFQH-QYIMKBBWNA-N, BXFKTWLTXGOBEA-LVBVOWIENA-N, CIXCULDFPCVHHJ-HBLVUIEFNA-N, CJIYDZCBEVDWCW-LVBVOWIENA-N, DYLAPHHDYKOXTM-GRGWYUSKNA-N, DYOMBYVKIKSSKA-FOFJVPNENA-N, FUIZMUJCQMPCQO-AWOVZMASNA-N, GELLCYIBARRGEQ-LBXGSASVNA-N, GVNOVHPRZPBICJ-FIQXLTFTNA-N, GWONLPRKRGHCSH-XWAXDLMJNA-N, GYHLNTVFYDYOSI-RRBMBBTGNA-N, GZLLGJZWPNACTL-LBXGSASVNA-N, HLDABGRURHIGCJ-RZEXXKR…	C61H116O5	1	M+Na	951.868		12.37	12.34	65.0538	15.4105	97.7099	100	0.464046	2.31055e-05	0.00408697	0.348968	0.0158721	0.985013	0.439328	0.127951	0.765052	0.086638	0.464863	0.709168	0.236137	0.000148661	0.0321097
TAG O-56:2	TAG-O	RP_PosMS1_1393		Y	GL	TG O-12:0_22:0_22:2 M+Na Atlas --- TG O-12:0_22:1_22:1 M+Na Atlas --- TG O-14:0_20:0_22:2 M+Na Atlas --- TG O-14:0_20:1_22:1 M+Na Atlas --- TG O-14:0_20:2_22:0 M+Na Atlas --- TG O-14:1_20:0_22:1 M+Na Atlas --- TG O-14:1_20:1_22:0 M+Na Atlas --- TG O-16:0_18:0_22:2 M+Na Atlas --- TG O-16:0_18:1_22:1 M+Na Atlas --- TG O-16:0_18:2_22:0 M+Na Atlas --- TG O-16:0_20:0_20:2 M+Na Atlas --- TG O-16:0_20:1…	Lipids and lipid-like molecules	Glycerolipids	Triradylcglycerols	HMDB0045892, HMDB0050508, HMDB0051560, HMDB0053315, HMDB0054370	TG(20:0/18:2(9Z,12Z)/O-18:0) --- TG(20:1(11Z)/18:1(9Z)/O-18:0) --- TG(22:1(13Z)/16:1(9Z)/O-18:0) --- TG(20:2n6/18:0/O-18:0) --- TG(22:2(13Z,16Z)/16:0/O-18:0)								ABSRVGFBFXCQQQ-KWYCXWARNA-N, AEZQVRQUYOLJCS-NAMCCYITNA-N, BDCSDBVNZGJCKJ-OXQPSHBUNA-N, BPRREWCNMINHAG-LBXGSASVNA-N, CNFSLXGBEDOAGF-DSOYXUETNA-N, CTYDXUQBSLUGNA-RRBMBBTGNA-N, DFZWUMPLFOAMAX-OXQPSHBUNA-N, DRVVRWBANXIQND-HBLVUIEFNA-N, FEQGTAIRRDJZLL-LPUXYYICNA-N, FMXZQUNYDWFSOP-KDGQPXOJNA-N, GRWAFFDXKWCYFG-LVBVOWIENA-N, HFKRCXNHVLLWOA-KWYCXWARNA-N, HWCKVFZSLJMYRW-GRGWYUSKNA-N, HZMDDXSLGXHGLR-UHVUIYC…	C59H112O5	1	M+Na	923.837		12.14	12.11	60.4839	15.1395	96.1832	100	0.454951	3.46001e-05	0.0046741	0.383578	0.00784439	0.985013	0.532273	0.0644662	0.765052	0.16343	0.166626	0.577183	0.24453	8.21674e-05	0.0280191
TAG 54:2	TAG	RP_PosMSMS_1344, 1358		Y	GL	TG 18:0_18:1_18:1 M+NH4 Atlas, TG 18:0_18:1_18:1 M+Na Atlas	Lipids and lipid-like molecules	Glycerolipids	Triradylcglycerols	HMDB0005403, HMDB0031144	TG(18:0/18:1(9Z)/18:1(9Z)) --- Glycerol 1,2-di-(9Z-octadecenoate) 3-octadecanoate	Glycerolipids [GL]	Triradylglycerols [GL03]	Triacylglycerols [GL0301]	LMGL03010217	TG(18:0/18:1(9Z)/18:1(9Z))[iso3]	TG 54:2	TG 18:0_18:1_18:1	RYNHWWNZNIGDAQ-CDAVXRBQNA-N	C57H106O6	2, 1	M+NH4, M+Na	904.8267, 909.782	265.249	11.42	11.4	93.8172	10.4563	98.4733	100	0.423099	3.96373e-05	0.0046741	0.12143	0.376288	0.985013	0.521105	0.053052	0.765052	0.0701545	0.527653	0.737485	0.183259	0.0018942	0.11744
TAG O-54:2	TAG-O	RP_PosMS1_1326		Y	GL	TG O-10:0_22:0_22:2 M+Na Atlas --- TG O-10:0_22:1_22:1 M+Na Atlas --- TG O-12:0_20:0_22:2 M+Na Atlas --- TG O-12:0_20:1_22:1 M+Na Atlas --- TG O-12:0_20:2_22:0 M+Na Atlas --- TG O-14:0_18:0_22:2 M+Na Atlas --- TG O-14:0_18:1_22:1 M+Na Atlas --- TG O-14:0_18:2_22:0 M+Na Atlas --- TG O-14:0_20:0_20:2 M+Na Atlas --- TG O-14:0_20:1_20:1 M+Na Atlas --- TG O-14:1_18:0_22:1 M+Na Atlas --- TG O-14:1_18:1…	Lipids and lipid-like molecules	Glycerolipids --- Fatty Acyls	Triradylcglycerols --- Lineolic acids and derivatives	HMDB0049920, HMDB0050470, HMDB0051543, HMDB0052455, HMDB0053302, HMDB0054350	TG(18:1(9Z)/18:1(9Z)/O-18:0) --- TG(20:1(11Z)/16:1(9Z)/O-18:0) --- TG(22:1(13Z)/14:1(9Z)/O-18:0) --- TG(18:2(9Z,12Z)/18:0/O-18:0) --- TG(20:2n6/16:0/O-18:0) --- TG(22:2(13Z,16Z)/14:0/O-18:0)								AMDVXMMDUMNZSD-KIGFJTGBNA-N, ANTIYGSYVYRJNY-LVBVOWIENA-N, BEWKUNRLUXWOMY-KDAZGOSUNA-N, BFNZWFSVWCVPPI-YPAXQUSRNA-N, CBRZBNLRXZCZGU-LBXGSASVNA-N, CDLSWAWZDATCOP-DHSNEXAONA-N, CMJJSBIFDMGWSP-XWAXDLMJNA-N, CYGRMXXTHLGABG-DSOYXUETNA-N, DHEVJGKJKNWUBP-PCPMOZHJNA-N, DOBXZXJTEYLTEX-UHVUIYCVNA-N, DPGZTURRUFNLGU-YPAXQUSRNA-N, FDJGXJOYFFLTRP-MYSACRKYNA-N, FSFZSYNKVRVJGI-HBLVUIEFNA-N, FSPCXKITGCUBNT-DSOYXUE…	C57H108O5	1	M+Na	895.803		11.86	11.89	54.5699	12.4943	90.0763	100	0.42718	7.50021e-05	0.00758091	0.183986	0.198459	0.985013	0.465608	0.0988911	0.765052	0.157068	0.174325	0.582385	0.193892	0.0016447	0.11744
TAG 52:1	TAG	RP_PosMSMS_1275, 1288		Y	GL	TG 16:0_18:0_18:1 M+NH4 Atlas, TG 16:0_18:0_18:1 M+Na Atlas	Lipids and lipid-like molecules	Glycerolipids	Triradylcglycerols	HMDB0005367	TG(16:0/18:0/18:1(9Z))	Glycerolipids [GL]	Triradylglycerols [GL03]	Triacylglycerols [GL0301]	LMGL03010085	TG(16:0/18:0/18:1(9Z))[iso6]	TG 52:1	TG 16:0_18:0_18:1	NPCZZYKITFKRQZ-RFBIWTDZNA-N	C55H104O6	2	M+NH4, M+Na	878.8111, 883.7659	605.5467, 605.5485	11.4	11.355	91.129	7.53029	97.7099	100	0.407054	9.41067e-05	0.00790047	0.0446658	0.747305	0.993093	0.511285	0.0599225	0.765052	0.0984833	0.378795	0.676013	0.162865	0.00647621	0.2331
Cer 40:3;O2	Cer	RP_PosMSMS_530		Y	nonGL	Cer 18:1;2O/22:2 M+H Atlas													UEYFSMQWOHTOBM-KAKMLJFMNA-N	C40H75NO3	1	M+H	618.578		7.94	7.96	66.6667	23.1283	98.4733	100	0.408823	0.000100542	0.00790047	0.0609565	0.662664	0.993093	0.297557	0.280321	0.765052	0.111111	0.324424	0.657967	0.156015	0.00981752	0.245949
TAG 56:2	TAG	RP_PosMSMS_1413		Y	GL	TG 18:0_18:1_20:1 M+NH4 Atlas	Lipids and lipid-like molecules	Glycerolipids	Triradylcglycerols	HMDB0005404	TG(18:0/18:1(9Z)/20:1(11Z))	Glycerolipids [GL]	Triradylglycerols [GL03]	Triacylglycerols [GL0301]	LMGL03010434	TG(18:0/18:1(9Z)/20:1(11Z))[iso6]	TG 56:2	TG 18:0_18:1_20:1	OWMDNFFJJVRJMG-LPUXYYICNA-N	C59H110O6	1	M+NH4	932.858		11.7	11.66	74.1935	5.64941	97.7099	100	0.412067	0.000122603	0.00790047	-0.0281992	0.843176	0.993093	0.403482	0.150183	0.765052	0.13134	0.252931	0.634176	0.145057	0.0188912	0.250915
TAG O-54:3	TAG-O	RP_PosMS1_1320		Y	GL	TG O-10:0_22:0_22:3 M+Na Atlas --- TG O-10:0_22:1_22:2 M+Na Atlas --- TG O-12:0_20:0_22:3 M+Na Atlas --- TG O-12:0_20:1_22:2 M+Na Atlas --- TG O-12:0_20:2_22:1 M+Na Atlas --- TG O-12:0_20:3_22:0 M+Na Atlas --- TG O-14:0_18:0_22:3 M+Na Atlas --- TG O-14:0_18:1_22:2 M+Na Atlas --- TG O-14:0_18:2_22:1 M+Na Atlas --- TG O-14:0_18:3_22:0 M+Na Atlas --- TG O-14:0_20:0_20:3 M+Na Atlas --- TG O-14:0_20:1…	Lipids and lipid-like molecules	Fatty Acyls --- Glycerolipids	Lineolic acids and derivatives --- Triradylcglycerols	HMDB0052560, HMDB0053380, HMDB0054420, HMDB0055175	TG(18:2(9Z,12Z)/18:1(9Z)/O-18:0) --- TG(20:2n6/16:1(9Z)/O-18:0) --- TG(22:2(13Z,16Z)/14:1(9Z)/O-18:0) --- TG(18:3(9Z,12Z,15Z)/18:0/O-18:0)								AFJZTTXHSURMSY-PPZSVPAENA-N, AWSXSELWCOHYDR-QYEDFDFXNA-N, BFNOTPOIHWKZFK-ATTOZUNXNA-N, BFWUMNRHYGDIGX-YPAKGTMTNA-N, BRXAOIOAAFZDOA-IVMCLAMXNA-N, BZBOZOOUTRYXJW-RHKLCLBPNA-N, CAJCEYAYJHRTAV-CLLPMJJLNA-N, CCDVOCBBVCIUPQ-JEDOZFSMNA-N, CDXWSOAQLYNASC-CANDFIAGNA-N, CRCJJZNSIWAJTE-UVJROEBXNA-N, CWVUILNZCWRGFS-IUPFWZBJNA-N, CYGJVQGBWVVIOC-KAGHWTIINA-N, CZXOQKSALQPUME-SFEYLKDXNA-N, CZZPPRNVPCXLLM-XCRJPZT…	C57H106O5	1	M+Na	893.79		11.66	11.66	33.6022	24.7949	80.916	100	0.419435	0.000131644	0.00790047	0.353424	0.0137991	0.985013	0.223101	0.43806	0.765052	0.204017	0.081003	0.491623	0.212181	0.000647708	0.0736227
TAG 50:0	TAG	RP_PosMSMS_1189, 1206		Y	GL	TG 16:0_16:0_18:0 M+NH4 Atlas, TG 16:0_16:0_18:0 M+Na Atlas	Lipids and lipid-like molecules	Glycerolipids	Triradylcglycerols	HMDB0005357	TG(16:0/16:0/18:0)	Glycerolipids [GL]	Triradylglycerols [GL03]	Triacylglycerols [GL0301]	LMGL03010004	TG(16:0/16:0/18:0)	TG 50:0	TG 16:0_16:0_18:0	DQKMNCLZNGAXNX-UHFFFAOYNA-N	C53H102O6	1	M+NH4, M+Na	852.7949, 857.7504		11.37	11.34	82.5269	5.6973	96.1832	100	0.405251	0.000133995	0.00790047	0.164718	0.240897	0.985013	0.578092	0.0359621	0.765052	0.143697	0.205482	0.609902	0.188778	0.00179046	0.11744
TAG 50:1	TAG	RP_PosMSMS_1129, 1182, 1199		Y	GL	1,2-Dihexadecanoyl-3-(9Z-octadecenoyl)-sn-glycerol M+H NIST, TG 16:0_16:0_18:1 M+NH4 Atlas, TG 16:0_16:0_18:1 M+Na Atlas	Lipids and lipid-like molecules	Glycerolipids	Triradylcglycerols	HMDB0005360, HMDB0031119	TG(16:0/16:0/18:1(9Z)) --- Glycerol 1,2-dihexadecanoate 3-(9Z-octadecenoate)	Glycerolipids [GL]	Triradylglycerols [GL03]	Triacylglycerols [GL0301]	LMGL03010006	TG(16:0/16:0/18:1(9Z))	TG 50:1	TG 16:0_16:0_18:1	YHMDGPZOSGBQRH-YYSBDVFPSA-N, YHMDGPZOSGBQRH-QPLCGJKRNA-N	C53H100O6	1	M+H, M+NH4, M+Na	833.7529, 850.7797, 855.7349		11.08	11.05	98.3871	15.6777	98.4733	100	0.403797	0.000150619	0.00819752	0.104979	0.457305	0.985013	0.389575	0.161534	0.765052	0.128615	0.25918	0.636017	0.167469	0.00603784	0.2331
TAG 51:1	TAG	RP_PosMSMS_1236, 1252		Y	GL	TG 16:0_17:0_18:1 M+NH4 Atlas, TG 16:0_17:0_18:1 M+Na Atlas						Glycerolipids [GL]	Triradylglycerols [GL03]	Triacylglycerols [GL0301]	LMGL03010051	TG(16:0/17:0/18:1(9Z))[iso6]	TG 51:1	TG 16:0_17:0_18:1	RHDRMOUSDQDVCE-RFBIWTDZNA-N	C54H102O6	2, 1	M+NH4, M+Na	864.7951, 869.751	565.51	11.235	11.21	80.6452	8.30066	98.4733	100	0.387751	0.0003547	0.0179258	0.0927427	0.517787	0.985013	0.393932	0.163113	0.765052	0.0950158	0.412188	0.692938	0.160237	0.00979858	0.245949
PS 42:8	PS	RP_NegMS1_684		Y	nonGL	PS 20:2_22:6 M-H Atlas	Lipids and lipid-like molecules	Glycerophospholipids	Glycerophosphoserines	HMDB0116765	PS(20:2(11Z,14Z)/22:6(4Z,7Z,10Z,13Z,16Z,19Z))	Glycerophospholipids [GP]	Glycerophosphoserines [GP03]	Diacylglycerophosphoserines [GP0301]	LMGP03010588	PS(20:2(11Z,14Z)/22:6(4Z,7Z,10Z,13Z,16Z,19Z))	PS 42:8	PS 20:2_22:6	WDVXEDLZZBGRSA-DZXNONRJNA-N	C48H78NO10P	1	M-H	858.527		6.35	6.32	58.221	26.3811	85.4962	100	0.376279	0.000513995	0.021202	0.100296	0.482523	0.985013	0.148757	0.598561	0.765052	0.110483	0.338173	0.66696	0.14595	0.0185237	0.250915
TAG 57:6	TAG	RP_PosMS1_1424		Y	GL	TG 10:0_11:0_36:6 M+NH4 Atlas --- TG 10:0_13:0_34:6 M+NH4 Atlas --- TG 10:0_13:1_34:5 M+NH4 Atlas --- TG 10:0_15:0_32:6 M+NH4 Atlas --- TG 10:0_15:1_32:5 M+NH4 Atlas --- TG 10:0_17:0_30:6 M+NH4 Atlas --- TG 10:0_17:1_30:5 M+NH4 Atlas --- TG 10:0_17:2_30:4 M+NH4 Atlas --- TG 10:0_19:0_28:6 M+NH4 Atlas --- TG 10:0_19:1_28:5 M+NH4 Atlas --- TG 10:0_19:2_28:4 M+NH4 Atlas --- TG 10:0_21:0_26:6 M+NH4 A…	Lipids and lipid-like molecules	Glycerolipids	Triradylcglycerols	HMDB0043103, HMDB0043305, HMDB0043704, HMDB0043726	TG(15:0/20:0/22:6(4Z,7Z,10Z,13Z,16Z,19Z)) --- TG(15:0/20:1(11Z)/22:5(7Z,10Z,13Z,16Z,19Z)) --- TG(15:0/20:4(8Z,11Z,14Z,17Z)/22:2(13Z,16Z)) --- TG(15:0/20:5(5Z,8Z,11Z,14Z,17Z)/22:1(13Z))	Glycerolipids [GL]	Triradylglycerols [GL03]	Triacylglycerols [GL0301]	LMGL03010790 --- LMGL03010811 --- LMGL03010812 --- LMGL03010907 --- LMGL03010908 --- LMGL03010909 --- LMGL03010953 --- LMGL03010974 --- LMGL03010996 --- LMGL03010997 --- LMGL03011001 --- LMGL03011060 --- LMGL03011061 --- LMGL03011101 --- LMGL03011108 --- LMGL03011146 --- LMGL03011151 --- LMGL03012749 --- LMGL03014121 --- LMGL03014550 --- LMGL03014955 --- LMGL03015277 --- LMGL03015288 --- LMGL0301…	TG(13:0/22:0/22:6(4Z,7Z,10Z,13Z,16Z,19Z))[iso6] --- TG(13:0/22:3(10Z,13Z,16Z)/22:3(10Z,13Z,16Z))[iso3] --- TG(14:0/21:0/22:6(4Z,7Z,10Z,13Z,16Z,19Z))[iso6] --- TG(14:1(9Z)/21:0/22:5(7Z,10Z,13Z,16Z,19Z))[iso6] --- TG(15:0/20:0/22:6(4Z,7Z,10Z,13Z,16Z,19Z))[iso6] --- TG(15:0/20:1(11Z)/22:5(7Z,10Z,13Z,16Z,19Z))[iso6] --- TG(15:1(9Z)/20:0/22:5(7Z,10Z,13Z,16Z,19Z))[iso6] --- TG(15:1(9Z)/20:2(11Z,14Z)/22…	TG 57:6	TG 13:0_22:0_22:6 --- TG 13:0_22:3_22:3 --- TG 14:0_21:0_22:6 --- TG 14:1_21:0_22:5 --- TG 15:0_20:0_22:6 --- TG 15:0_20:1_22:5 --- TG 15:1_20:0_22:5 --- TG 15:1_20:2_22:3 --- TG 15:1_20:5_22:0 --- TG 16:0_19:0_22:6 --- TG 16:0_19:1_22:5 --- TG 16:1_19:0_22:5 --- TG 16:1_20:5_21:0 --- TG 17:0_18:0_22:6 --- TG 17:0_18:1_22:5 --- TG 17:0_18:3_22:3 --- TG 17:0_18:4_22:2 --- TG 17:0_20:1_20:5 --- TG …	AENLFLCMIPVZOP-VJEFUCHJNA-N, AGGPAQGYZFNSJA-LSYJYILLNA-N, AJUDOVWHNRZPLQ-VVTJGOBYNA-N, AJVWGNRCOIABJN-VQOFFUFCNA-N, ALXYPMDIGNQWGL-BAFVLRKBNA-N, ANWNELKWFBPTGV-ASHXNYRANA-N, AORWANIMKVMQRO-QMIDLTDENA-N, APRCNXIVTFFWIB-SGUAYWQRNA-N, APXPZQFXELEWCF-PAAUMLEUNA-N, ARYUKUHAWDKINO-WYKSHIOTNA-N, ASPGTJOGCUPUDC-YKLZPTNQNA-N, ASWDBPTYBBFUKO-LLEHBTHGNA-N, ATPHWMUELUKHOB-QOPFCPHQNA-N, ATRYEMIXRKYBMO-GZDLQTJ…	C60H104O6	1	M+NH4	938.817		11.68	11.69	68.8172	6.606	100	100	0.376702	0.000516523	0.021202	0.0857477	0.548977	0.9863	0.525321	0.0612761	0.765052	0.0694857	0.548077	0.750396	0.161874	0.00888316	0.245949
TAG 48:0	TAG	RP_PosMSMS_1105		Y	GL	TG 16:0_16:0_16:0 M+NH4 Atlas	Lipids and lipid-like molecules	Glycerolipids	Triradylcglycerols	HMDB0005356	TG(16:0/16:0/16:0)	Glycerolipids [GL]	Triradylglycerols [GL03]	Triacylglycerols [GL0301]	LMGL03010001	TG(16:0/16:0/16:0)	TG 48:0	TG 16:0_16:0_16:0	PVNIQBQSYATKKL-UHFFFAOYSA-N	C51H98O6	2	M+NH4	824.764	579.532	11.06	11.02	97.5806	16.8011	98.4733	100	0.375225	0.0005363	0.021202	0.130331	0.36121	0.985013	0.483475	0.085042	0.765052	0.157929	0.170059	0.578755	0.167949	0.00649399	0.2331
TAG 57:7	TAG	RP_PosMS1_1420		Y	GL	TG 10:0_11:0_36:7 M+NH4 Atlas --- TG 10:0_13:0_34:7 M+NH4 Atlas --- TG 10:0_13:1_34:6 M+NH4 Atlas --- TG 10:0_15:0_32:7 M+NH4 Atlas --- TG 10:0_15:1_32:6 M+NH4 Atlas --- TG 10:0_17:0_30:7 M+NH4 Atlas --- TG 10:0_17:1_30:6 M+NH4 Atlas --- TG 10:0_17:2_30:5 M+NH4 Atlas --- TG 10:0_19:0_28:7 M+NH4 Atlas --- TG 10:0_19:1_28:6 M+NH4 Atlas --- TG 10:0_19:2_28:5 M+NH4 Atlas --- TG 10:0_21:0_26:7 M+NH4 A…	Lipids and lipid-like molecules	Glycerolipids	Triradylcglycerols	HMDB0043306, HMDB0043479, HMDB0043733	TG(15:0/20:1(11Z)/22:6(4Z,7Z,10Z,13Z,16Z,19Z)) --- TG(15:0/20:2n6/22:5(7Z,10Z,13Z,16Z,19Z)) --- TG(15:0/20:5(5Z,8Z,11Z,14Z,17Z)/22:2(13Z,16Z))	Glycerolipids [GL]	Triradylglycerols [GL03]	Triacylglycerols [GL0301]	LMGL03010879 --- LMGL03010880 --- LMGL03010881 --- LMGL03010980 --- LMGL03010981 --- LMGL03011025 --- LMGL03011071 --- LMGL03011072 --- LMGL03011073 --- LMGL03011076 --- LMGL03011077 --- LMGL03011136 --- LMGL03011229 --- LMGL03014129 --- LMGL03014956 --- LMGL03015289 --- LMGL03015299 --- LMGL03015323 --- LMGL03015628 --- LMGL03015639 --- LMGL03015787 --- LMGL03015877 --- LMGL03015946 --- LMGL0301…	TG(13:0/22:2(13Z,16Z)/22:5(7Z,10Z,13Z,16Z,19Z))[iso6] --- TG(14:1(9Z)/21:0/22:6(4Z,7Z,10Z,13Z,16Z,19Z))[iso6] --- TG(15:0/20:1(11Z)/22:6(4Z,7Z,10Z,13Z,16Z,19Z))[iso6] --- TG(15:0/20:2(11Z,14Z)/22:5(7Z,10Z,13Z,16Z,19Z))[iso6] --- TG(15:0/20:5(5Z,8Z,11Z,14Z,17Z)/22:2(13Z,16Z))[iso6] --- TG(15:1(9Z)/20:0/22:6(4Z,7Z,10Z,13Z,16Z,19Z))[iso6] --- TG(15:1(9Z)/20:1(11Z)/22:5(7Z,10Z,13Z,16Z,19Z))[iso6] ---…	TG 57:7	TG 13:0_22:2_22:5 --- TG 14:1_21:0_22:6 --- TG 15:0_20:1_22:6 --- TG 15:0_20:2_22:5 --- TG 15:0_20:5_22:2 --- TG 15:1_20:0_22:6 --- TG 15:1_20:1_22:5 --- TG 16:0_19:1_22:6 --- TG 16:1_19:0_22:6 --- TG 16:1_19:1_22:5 --- TG 17:0_18:1_22:6 --- TG 17:0_18:2_22:5 --- TG 17:0_18:4_22:3 --- TG 17:0_20:2_20:5 --- TG 17:1_18:0_22:6 --- TG 17:1_18:1_22:5 --- TG 17:1_18:3_22:3 --- TG 17:1_18:4_22:2 --- TG …	ABIHZYKHJQIRRS-BWQGAKPSNA-N, AHECPNVJGGXMBX-CNTGQPGTNA-N, AJRLEIAYQWSFPO-JELOBYIYNA-N, AQUHXDMGHQXAAQ-NWAVVKKPNA-N, ATCCFGNTXPYXKT-BEDDTURCNA-N, AULVFZDMHSTHBW-GYLSQDBANA-N, AZVDETBIUDDFMS-RHNYNXFHNA-N, BBCQBYHUQXHRSN-RUWKNYBFNA-N, BCPBCAGXYTYWRU-FHNQPHBPNA-N, BDRFJGUKBPRFCR-HIMZQEJRNA-N, BEBMAFRJXCVJBT-GAOPFFRGNA-N, BEOARQCIBZURTR-KBKNCFMVNA-N, BEWDUIYNCJDHHO-KJFYEOLCNA-N, BNLJLJHFQCSBJR-IIPVNNF…	C60H102O6	1	M+NH4	936.801		11.44	11.44	75	7.00219	99.2366	100	0.367148	0.000565676	0.021202	0.0194829	0.889715	0.997945	0.501055	0.0689944	0.765052	0.0024241	0.982976	0.841471	0.144851	0.0173446	0.250915
TAG 51:0	TAG	RP_PosMSMS_1258		Y	GL	TG 16:0_17:0_18:0 M+Na Atlas --- TG 17:0_17:0_17:0 M+Na Atlas	Lipids and lipid-like molecules	Glycerolipids	Triradylcglycerols	HMDB0031106	Glycerol triheptadecanoate	Glycerolipids [GL]	Triradylglycerols [GL03]	Triacylglycerols [GL0301]	LMGL03010031	TG(17:0/17:0/17:0)	TG 51:0	TG 17:0_17:0_17:0	FBFWDBGUSMGXPI-UHFFFAOYSA-N, YVLSJEQNDDKMQI-UHFFFAOYNA-N	C54H104O6	1	M+Na	871.767		11.51	11.53	35.7527	13.7615	59.542	100	0.378961	0.000569359	0.021202	0.349241	0.0145619	0.985013	0.651186	0.0214534	0.765052	0.115478	0.32378	0.657967	0.219693	0.000377378	0.0514743
TAG 55:3	TAG	RP_PosMSMS_1375, 1387		Y	GL	TG 18:1_18:1_19:1 M+NH4 Atlas, TG 18:1_18:1_19:1 M+Na Atlas						Glycerolipids [GL]	Triradylglycerols [GL03]	Triacylglycerols [GL0301]	LMGL03013031	TG(18:1(9Z)/18:1(9Z)/19:1(9Z))[iso3]	TG 55:3	TG 18:1_18:1_19:1	ASJJOPLGTKDUEX-UWDAMKIQNA-N	C58H106O6	2, 1	M+NH4, M+Na	916.8265, 921.782	617.552	11.325	11.31	63.9785	24.2135	97.7099	100	0.373635	0.00063332	0.0224047	0.0926093	0.520293	0.985013	0.553088	0.0501689	0.765052	-0.0209233	0.857565	0.825812	0.163599	0.0086246	0.245949
TAG 52:0	TAG	RP_PosMSMS_1292		Y	GL	TG 16:0_18:0_18:0 M+Na Atlas	Lipids and lipid-like molecules	Glycerolipids	Triradylcglycerols	HMDB0005365, HMDB0108596	TG(16:0/18:0/18:0) --- TG(18:0/18:0/16:0)	Glycerolipids [GL]	Triradylglycerols [GL03]	Triacylglycerols [GL0301]	LMGL03010069	TG(16:0/18:0/18:0)[iso3]	TG 52:0	TG 16:0_18:0_18:0	SDNYRTVJOFMYIW-UHFFFAOYNA-N	C55H106O6	1	M+Na	885.782		11.65	11.63	67.2043	10.7526	92.3664	100	0.348871	0.000701121	0.0230624	0.156885	0.245981	0.985013	0.378167	0.15658	0.765052	0.202379	0.062766	0.444426	0.159525	0.00642008	0.2331
TAG O-60:8	TAG-O	RP_PosMS1_1476		Y	GL	TG O-16:0_22:2_22:6 M+Na Atlas --- TG O-16:0_22:3_22:5 M+Na Atlas --- TG O-16:0_22:4_22:4 M+Na Atlas --- TG O-16:1_22:1_22:6 M+Na Atlas --- TG O-16:1_22:2_22:5 M+Na Atlas --- TG O-16:1_22:3_22:4 M+Na Atlas --- TG O-16:2_22:0_22:6 M+Na Atlas --- TG O-16:2_22:1_22:5 M+Na Atlas --- TG O-16:2_22:2_22:4 M+Na Atlas --- TG O-16:2_22:3_22:3 M+Na Atlas --- TG O-16:3_22:0_22:5 M+Na Atlas --- TG O-16:3_22:1…	Lipids and lipid-like molecules	Glycerolipids	Triradylcglycerols	HMDB0055928	TG(22:6(4Z,7Z,10Z,13Z,16Z,19Z)/20:2n6/O-18:0)								ADOVINVLNMGPCA-BBVSQTKQNA-N, AGJXCDRWZNJPRJ-SIOAFNFSNA-N, AOSIEGZBZCSNAE-ALMBGZEPNA-N, AQGPGCGZHVKPMT-NQBJMNHBNA-N, ARQAVKPKADGPAG-RHXJYLCGNA-N, BBAOQCSGVDSRON-YZPIHWQENA-N, BIQXTBQHRDZZBK-VLRVIMMINA-N, BIVIXVDDHSYUIR-QAYKVYIWNA-N, BKTPHCOXTPSXTK-HWYYOFFJNA-N, BNAQIINGZFAHTN-KLGWTQLBNA-N, BUBLFFRWGTWHOT-WGSMUPIHNA-N, CENNWGJTXGVPPD-PRCNTBHLNA-N, CGTVOXPJKNFERZ-VNBMKEFBNA-N, CLTWRJKKGHRSBZ-UDFHZAQ…	C63H108O5	1	M+Na	967.803		11.85	11.82	54.5699	15.0038	80.916	100	0.367264	0.000794393	0.0230624	0.163011	0.256812	0.985013	0.663071	0.0183841	0.765052	0.0332411	0.775544	0.807526	0.180609	0.00360686	0.20499
Cer 38:0;O2	Cer	RP_PosMS1_502		Y	nonGL	Cer 20:0;2O/18:0 M+H Atlas						Sphingolipids [SP]	Ceramides [SP02]	N-acylsphinganines (dihydroceramides) [SP0202]	LMSP02020024	Cer(d20:0/18:0)	Cer 38:0;O2	Cer 20:0;O2/18:0	OGWKBOGOKYSQSD-UHFFFAOYNA-N	C38H77NO3	1	M+H	596.594		7.99	7.9	70.4301	21.3998	85.4962	100	0.354517	0.000797038	0.0230624	-0.0409207	0.768812	0.993093	0.40465	0.139484	0.765052	0.0501984	0.655538	0.785957	0.124422	0.0398917	0.323883
TAG 46:0	TAG	RP_PosMSMS_1016		Y	GL	TG 14:0_16:0_16:0 M+NH4 Atlas	Lipids and lipid-like molecules	Glycerolipids	Triradylcglycerols	HMDB0042123	TG(14:0/16:0/16:0)	Glycerolipids [GL]	Triradylglycerols [GL03]	Triacylglycerols [GL0301]	LMGL03012786	TG(14:0/16:0/16:0)[iso3]	TG 46:0	TG 14:0_16:0_16:0	JWVXCFSNEOMSHH-UHFFFAOYNA-N	C49H94O6	2	M+NH4	796.733	523.476	10.72	10.66	97.8495	20.5144	98.4733	100	0.364522	0.00080439	0.0230624	0.121762	0.394573	0.985013	0.375607	0.182965	0.765052	0.203665	0.0764056	0.480721	0.157575	0.0109793	0.245949
Cer 36:0;O2	Cer	RP_Pos, RP_NegMSMS_466, 229		Y	nonGL	Cer 10:0;2O/26:0 M+H Atlas --- Cer 11:0;2O/25:0 M+H Atlas --- Cer 12:0;2O/24:0 M+H Atlas --- Cer 13:0;2O/23:0 M+H Atlas --- Cer 14:0;2O/22:0 M+H Atlas --- Cer 15:0;2O/21:0 M+H Atlas --- Cer 16:0;2O/20:0 M+H Atlas --- Cer 17:0;2O/19:0 M+H Atlas --- Cer 18:0;2O/18:0 M+H Atlas --- Cer 19:0;2O/17:0 M+H Atlas --- Cer 20:0;2O/16:0 M+H Atlas --- Cer 21:0;2O/15:0 M+H Atlas --- Cer 22:0;2O/14:0 M+H Atlas …	Lipids and lipid-like molecules	Sphingolipids	Ceramides	HMDB0011761	Cer(d18:0/18:0)	Sphingolipids [SP]	Ceramides [SP02]	N-acylsphinganines (dihydroceramides) [SP0202]	LMSP02020008	Cer(d18:0/18:0)	Cer 36:0;O2	Cer 18:0;O2/18:0	AYUUKXWWIRFLNJ-UHFFFAOYNA-N, BYBFRXMGUDPPBH-UHFFFAOYNA-N, CNALYELYVLSNQI-UHFFFAOYNA-N, GIMCISPCSGXTKV-UHFFFAOYNA-N, HZQUXKZJXGXERJ-UHFFFAOYNA-N, IVRXFQMMPYTUQZ-UHFFFAOYNA-N, IZYUPWORJXGYAX-UHFFFAOYNA-N, JWLAAGBRLDQPSL-UHFFFAOYNA-N, JXDCRHQXNWBDJD-UHFFFAOYNA-N, KOEKXZWIUGKIRA-UHFFFAOYNA-N, KZTJQXAANJHSCE-OIDHKYIRSA-N, KZTJQXAANJHSCE-UHFFFAOYNA-N, LBGZAHNTHPJTHA-UHFFFAOYNA-N, LCYDQXUBXVTKNJ-UHFFFAO…	C36H73NO3	1, 2	M+H, M+HCOO	568.5624, 612.5569	566.548	7.315	7.25	90.0538	28.1101	82.4427	100	0.355887	0.000814891	0.0230624	0.0744887	0.594498	0.993093	0.272389	0.324044	0.765052	0.226752	0.0430283	0.442848	0.140611	0.0205648	0.250915
TAG 56:3	TAG	RP_PosMSMS_1410, 1418		Y	GL	TG 18:1_18:1_20:1 M+NH4 Atlas, TG 18:1_18:1_20:1 M+Na Atlas	Lipids and lipid-like molecules	Glycerolipids	Triradylcglycerols	HMDB0005454	TG(18:1(9Z)/18:1(9Z)/20:1(11Z))	Glycerolipids [GL]	Triradylglycerols [GL03]	Triacylglycerols [GL0301]	LMGL03010484	TG(18:1(9Z)/18:1(9Z)/20:1(11Z))[iso3]	TG 56:3	TG 18:1_18:1_20:1	QXMHHXQBBKDSSL-DCKNSECYNA-N	C59H108O6	1	M+NH4, M+Na	930.8416, 935.7976		11.45	11.42	77.4194	7.72644	97.7099	100	0.350883	0.00112135	0.0305151	0.0575967	0.684163	0.993093	0.482316	0.0827208	0.765052	0.023949	0.834342	0.818513	0.146132	0.0172587	0.250915
TAG O-62:8	TAG-O	RP_PosMS1_1533		Y	GL	TG O-18:0_22:2_22:6 M+Na Atlas --- TG O-18:0_22:3_22:5 M+Na Atlas --- TG O-18:0_22:4_22:4 M+Na Atlas --- TG O-18:1_22:1_22:6 M+Na Atlas --- TG O-18:1_22:2_22:5 M+Na Atlas --- TG O-18:1_22:3_22:4 M+Na Atlas --- TG O-18:2_22:0_22:6 M+Na Atlas --- TG O-18:2_22:1_22:5 M+Na Atlas --- TG O-18:2_22:2_22:4 M+Na Atlas --- TG O-18:2_22:3_22:3 M+Na Atlas --- TG O-18:3_22:0_22:5 M+Na Atlas --- TG O-18:3_22:1…	Lipids and lipid-like molecules	Glycerolipids	Triradylcglycerols	HMDB0055934	TG(22:6(4Z,7Z,10Z,13Z,16Z,19Z)/22:2(13Z,16Z)/O-18:0)								AOJXUXNZQDGMBR-KXNOMXQTNA-N, AYXLSMYSINAEFJ-XMYPWDSENA-N, BGPWGZPPFGTTPG-GECUABELNA-N, BHOWMZVGOIGOEO-FMIIEDRVNA-N, BIIYKIAHJLHABA-JWPQYVTONA-N, BLZIEEQKOBBRGI-HDOLWPLLNA-N, BQZNBDZHFBBLBT-UQWDXJQLNA-N, CFXBRJWQBQHOQU-TXLSCPJONA-N, CHRNQFWQHDWLNQ-GHWOOSPONA-N, CQALDQMPJKNXON-HTFUCRLCNA-N, CQSQWMUUYJBJQQ-MVBKMVSINA-N, CVQPNHBNTATPEF-CZVMMLJJNA-N, DAZZBKLHFMRJOB-DCGLSBFXNA-N, DHDAOGGDAIYXOZ-OAUBZMQ…	C65H112O5	1	M+Na	995.834		12.04	12.01	57.5269	12.6064	93.8931	100	0.351079	0.00118504	0.0310538	0.168911	0.233812	0.985013	0.354615	0.20598	0.765052	0.026178	0.820086	0.816992	0.161384	0.00868747	0.245949
1-O-Hexadecyl-2-O-(2E-butenoyl)-sn-glyceryl-3-phosphocholine	Other lipids	RP_PosMSMS_437		Y	nonGL	1-O-Hexadecyl-2-O-(2E-butenoyl)-sn-glyceryl-3-phosphocholine M+H NIST													SRZBVCCSIMMDOV-QPSGOUHRSA-N	C28H56NO7P	1	M+H	550.384		3.42	3.43	64.7849	19.067	97.7099	100	-0.346736	0.00127025	0.032098	-0.0673874	0.633561	0.993093	-0.386618	0.164788	0.765052	-0.180716	0.111755	0.513486	-0.141982	0.020603	0.250915
LNAPE N-40:4	LNAPE	HILIC_NegMSMS_1359		Y	nonGL	LNAPE 20:4/N-20:0 M-H Atlas													BNGSZDKQOSZEED-NBORNWBVNA-N	C45H82NO8P	1	M-H	794.565		6.49	6.48	12.7371	17.4281	35.3383	100	0.354516	0.00132142	0.0322395	0.0546324	0.706423	0.993093	0.0707909	0.805075	0.768914	-0.128219	0.272963	0.642621	0.126384	0.0452713	0.336408
TAG 54:3	TAG	RP_PosMSMS_1339, 1351		Y	GL	TG 18:1_18:1_18:1 M+NH4 Atlas, TG 18:0_18:1_18:2 M+Na Atlas --- TG 18:1_18:1_18:1 M+Na Atlas	Lipids and lipid-like molecules	Glycerolipids	Triradylcglycerols	HMDB0005453	TG(18:1(9Z)/18:1(9Z)/18:1(9Z))	Glycerolipids [GL]	Triradylglycerols [GL03]	Triacylglycerols [GL0301]	LMGL03010250	TG(18:1(9Z)/18:1(9Z)/18:1(9Z))	TG 54:3	TG 18:1_18:1_18:1	PHYFQTYBJUILEZ-IUPFWZBJSA-N, CNGSOZKJBWHOEG-VBOJLMESNA-N, PHYFQTYBJUILEZ-IUPFWZBJSA-N	C57H104O6	2, 1	M+NH4, M+Na	902.8101, 907.7662	339.283	11.17	11.13	95.4301	6.70429	98.4733	100	0.35017	0.00139497	0.0328994	0.0927948	0.518814	0.985013	0.345872	0.222677	0.765052	0.0218097	0.851374	0.825267	0.145964	0.01935	0.250915
TAG 55:5	TAG	RP_PosMSMS_1365		Y	GL	TG 17:0_18:1_20:4 M+NH4 Atlas													INUZPYWKYINTOT-SSEISKJWNA-N	C58H102O6	1	M+NH4	912.795		10.97	10.94	24.7312	16.089	44.2748	100	0.341236	0.00167054	0.0381277	0.0252303	0.859481	0.993093	0.409796	0.143763	0.765052	-0.126	0.272773	0.642621	0.133243	0.0313866	0.305104
TAG 56:1	TAG	RP_PosMSMS_1416		Y	GL	TG 16:0_18:1_22:0 M+NH4 Atlas --- TG 18:0_18:1_20:0 M+NH4 Atlas	Lipids and lipid-like molecules	Glycerolipids	Triradylcglycerols	HMDB0005402, HMDB0031143, HMDB0044112	TG(18:0/18:1(9Z)/20:0) --- Glycerol 1-eicosanoate 2-(9Z-octadecenoate) 3-octadecanoate --- TG(16:0/18:1(9Z)/22:0)	Glycerolipids [GL]	Triradylglycerols [GL03]	Triacylglycerols [GL0301]	LMGL03010382 --- LMGL03010511	TG(16:0/18:1(9Z)/22:0)[iso6] --- TG(18:0/18:1(9Z)/20:0)[iso6]	TG 56:1	TG 16:0_18:1_22:0 --- TG 18:0_18:1_20:0	IFLOLSWWIHPMFV-ZXPTYKNPNA-N, OCYFAHIHWCVZKS-QVTSOHHYNA-N	C59H112O6	2	M+NH4	934.873	661.617	11.94	11.92	50	23.6671	70.9924	100	0.345809	0.0018638	0.0412093	0.120408	0.408278	0.985013	0.568757	0.046398	0.765052	0.0942833	0.423269	0.695343	0.160925	0.0107167	0.245949
TAG 48:1	TAG	RP_PosMSMS_1098		Y	GL	TG 14:0_16:0_18:1 M+NH4 Atlas	Lipids and lipid-like molecules	Glycerolipids	Triradylcglycerols	HMDB0042131	TG(14:0/16:0/18:1(9Z))	Glycerolipids [GL]	Triradylglycerols [GL03]	Triacylglycerols [GL0301]	LMGL03014226	TG(14:0/16:0/18:1(9Z))[iso6]	TG 48:1	TG 14:0_16:0_18:1	GPXZOHHIWJNYTJ-IZHYLOQSNA-N	C51H96O6	2	M+NH4	822.749	551.501	10.76	10.73	97.5806	15.8407	99.2366	100	0.344126	0.00203272	0.0425747	0.0974669	0.504802	0.985013	0.399464	0.165269	0.765052	0.14574	0.216158	0.614668	0.147599	0.0199619	0.250915
PG 34:0	PG	RP_Pos, RP_NegMS1_920, 417		Y	nonGL	1-Palmitoyl-2-stearoyl-sn-glycero-3-phospho-rac-1-glycerol M+H+H2O NIST --- SL 20:3;O/26:7 M+NH4 Atlas, 1-Palmitoyl-2-stearoyl-sn-glycero-3-phospho-rac-1-glycerol M-H NIST --- PG 10:0_24:0 M-H Atlas --- PG 11:0_23:0 M-H Atlas --- PG 12:0_22:0 M-H Atlas --- PG 13:0_21:0 M-H Atlas --- PG 14:0_20:0 M-H Atlas --- PG 15:0_19:0 M-H Atlas --- PG 16:0_18:0 M-H Atlas --- PG 17:0_17:0 M-H Atlas --- PG 7:0_…	Lipids and lipid-like molecules	Glycerophospholipids	Glycerophosphoglycerols	HMDB0010572	PG(16:0/18:0)	Glycerophospholipids [GP]	Glycerophosphoglycerols [GP04]	Diacylglycerophosphoglycerols [GP0401]	LMGP04010907, LMGP04010895 --- LMGP04010907 --- LMGP04010913 --- LMGP04010925 --- LMGP04010933 --- LMGP04010939	PG(16:0/18:0), PG(12:0/22:0) --- PG(13:0/21:0) --- PG(14:0/20:0) --- PG(15:0/19:0) --- PG(16:0/18:0) --- PG(17:0/17:0)	PG 34:0	PG 16:0_18:0, PG 12:0_22:0 --- PG 13:0_21:0 --- PG 14:0_20:0 --- PG 15:0_19:0 --- PG 16:0_18:0 --- PG 17:0/17:0	KBPVYRBBONZJHF-YWIOZPJLSA-N, KWXMWQHAJCWDRL-TUYMOWKKNA-N, AUGXCMPPEGEWRY-UHFFFAOYNA-N, COQWJWFHZUPHCO-UHFFFAOYNA-N, FFWBVTHGHZROME-UHFFFAOYNA-N, ICHMRBWWTMPPQQ-UHFFFAOYNA-N, KBPVYRBBONZJHF-UHFFFAOYNA-N, KBPVYRBBONZJHF-YWIOZPJLSA-N, MHMSBAHLAXFCQT-UHFFFAOYNA-N, QVTMHGKJALUQCM-UHFFFAOYNA-N, RHKLEUQCQMMTHF-UHFFFAOYNA-N, SPFRLTWPPAORML-UHFFFAOYNA-N, YZERRSGGSIATBM-UHFFFAOYNA-N, ZBVHXVKEMAIWQQ-UHFFFAO…	C40H79O10P	1	M+H+H2O --- M+NH4, M-H	769.5532, 749.5322		6.37	6.345	100	16.2266	100	100	0.331952	0.00214903	0.0425747	0.085234	0.547566	0.9863	0.204541	0.465258	0.765052	0.0497345	0.664404	0.785957	0.13175	0.0325301	0.305104
TAG 53:6	TAG	RP_PosMSMS_1285		Y	GL	TG 10:0_11:0_32:6 M+NH4 Atlas --- TG 10:0_13:0_30:6 M+NH4 Atlas --- TG 10:0_13:1_30:5 M+NH4 Atlas --- TG 10:0_15:0_28:6 M+NH4 Atlas --- TG 10:0_15:1_28:5 M+NH4 Atlas --- TG 10:0_17:0_26:6 M+NH4 Atlas --- TG 10:0_17:1_26:5 M+NH4 Atlas --- TG 10:0_17:2_26:4 M+NH4 Atlas --- TG 10:0_19:0_24:6 M+NH4 Atlas --- TG 10:0_19:1_24:5 M+NH4 Atlas --- TG 10:0_19:2_24:4 M+NH4 Atlas --- TG 10:0_21:0_22:6 M+NH4 A…	Lipids and lipid-like molecules	Glycerolipids	Triradylcglycerols	HMDB0043045, HMDB0043218, HMDB0043275, HMDB0043419, HMDB0043672	TG(15:0/16:0/22:6(4Z,7Z,10Z,13Z,16Z,19Z)) --- TG(15:0/16:1(9Z)/22:5(7Z,10Z,13Z,16Z,19Z)) --- TG(15:0/18:1(9Z)/20:5(5Z,8Z,11Z,14Z,17Z)) --- TG(15:0/18:2(9Z,12Z)/20:4(8Z,11Z,14Z,17Z)) --- TG(15:0/18:4(6Z,9Z,12Z,15Z)/20:2n6)	Glycerolipids [GL]	Triradylglycerols [GL03]	Triacylglycerols [GL0301]	LMGL03010251 --- LMGL03010253 --- LMGL03010254 --- LMGL03010255 --- LMGL03010281 --- LMGL03010282 --- LMGL03013566 --- LMGL03013579 --- LMGL03013926 --- LMGL03013945 --- LMGL03013997 --- LMGL03014012 --- LMGL03014062 --- LMGL03014295 --- LMGL03014317 --- LMGL03014472 --- LMGL03014700 --- LMGL03014743 --- LMGL03014864 --- LMGL03015030 --- LMGL03015054 --- LMGL03015157 --- LMGL03015224 --- LMGL0301…	TG(12:0/19:0/22:6(4Z,7Z,10Z,13Z,16Z,19Z))[iso6] --- TG(12:0/19:1(9Z)/22:5(7Z,10Z,13Z,16Z,19Z))[iso6] --- TG(13:0/18:0/22:6(4Z,7Z,10Z,13Z,16Z,19Z))[iso6] --- TG(13:0/18:1(9Z)/22:5(7Z,10Z,13Z,16Z,19Z))[iso6] --- TG(13:0/18:3(9Z,12Z,15Z)/22:3(10Z,13Z,16Z))[iso6] --- TG(13:0/18:4(6Z,9Z,12Z,15Z)/22:2(13Z,16Z))[iso6] --- TG(13:0/20:1(11Z)/20:5(5Z,8Z,11Z,14Z,17Z))[iso6] --- TG(14:0/17:0/22:6(4Z,7Z,10Z,1…	TG 53:6	TG 12:0_19:0_22:6 --- TG 12:0_19:1_22:5 --- TG 13:0_18:0_22:6 --- TG 13:0_18:1_22:5 --- TG 13:0_18:3_22:3 --- TG 13:0_18:4_22:2 --- TG 13:0_20:1_20:5 --- TG 14:0_17:0_22:6 --- TG 14:0_17:1_22:5 --- TG 14:0_19:1_20:5 --- TG 14:1_17:0_22:5 --- TG 14:1_17:2_22:3 --- TG 14:1_19:0_20:5 --- TG 15:0_16:0_22:6 --- TG 15:0_16:1_22:5 --- TG 15:0_18:1_20:5 --- TG 15:0_18:4_20:2 --- TG 15:1_16:0_22:5 --- TG …	AIYXLOFFZDCHEJ-NEKAMLPGNA-N, AKBMMKLODBPACY-LSBNEBQJNA-N, AKBYYUQTJVXIMA-FMPMRRDLNA-N, AKDVWAHETIXOFY-VUPIXCFUNA-N, AKRKSAMDZDDEIU-NPWWWOIKNA-N, ALXPCJAPEGTSNS-WNOCISIWNA-N, AMCGFKIULOOZOZ-ARFDBUJYNA-N, ANWDWPTYZXQYQJ-QFOYJUNTNA-N, AOTNKWCEXHYEMS-DQHSCPQFNA-N, AQNHEWROOMSEBC-LVQVJKGPNA-N, AVVNFGHOWWLPJH-QHPXFDACNA-N, AZRJVEOUFGWTSO-GMIPFOLTNA-N, BHHCOLYSPUJWQZ-KFSUWLPRNA-N, BMPNMMAEFGKGLN-GSBQDLB…	C56H96O6	1	M+NH4	882.754		11.11	11.08	100	10.5577	100	100	0.331837	0.00215813	0.0425747	0.16	0.257837	0.985013	0.322837	0.248172	0.765052	0.0196569	0.863915	0.825812	0.151996	0.0132924	0.250915
TAG O-56:8	TAG-O	RP_PosMS1_1361		Y	GL	TG O-12:0_22:2_22:6 M+Na Atlas --- TG O-12:0_22:3_22:5 M+Na Atlas --- TG O-12:0_22:4_22:4 M+Na Atlas --- TG O-14:0_20:2_22:6 M+Na Atlas --- TG O-14:0_20:3_22:5 M+Na Atlas --- TG O-14:0_20:4_22:4 M+Na Atlas --- TG O-14:0_20:5_22:3 M+Na Atlas --- TG O-14:1_20:1_22:6 M+Na Atlas --- TG O-14:1_20:2_22:5 M+Na Atlas --- TG O-14:1_20:3_22:4 M+Na Atlas --- TG O-14:1_20:4_22:3 M+Na Atlas --- TG O-14:1_20:5…	Lipids and lipid-like molecules	Glycerolipids	Triradylcglycerols	HMDB0055660, HMDB0055780	TG(20:4(8Z,11Z,14Z,17Z)/18:4(6Z,9Z,12Z,15Z)/O-18:0) --- TG(20:5(5Z,8Z,11Z,14Z,17Z)/18:3(9Z,12Z,15Z)/O-18:0)								AHYLJVKWPJAYAT-NQAYCGKSNA-N, ALGJPVSNXCZPNP-YNXFNPAFNA-N, AMTCVYXSHKHGAI-CPRJYEQFNA-N, ANNCSSCTEPBANZ-XBZDXEJUNA-N, ANOJIMODCCBNBH-WGZUGKALNA-N, AUWVWWNVBDUCGC-MYNTXOQANA-N, BDDGXKPAJKWKTC-JADCNTOBNA-N, BFKHVJIDVSMZKN-XRSLUVBANA-N, BGHJNAFTHDBWAH-CVNWYVPDNA-N, BHMFNVIDRMDDTL-BLSPISNXNA-N, BIHYEHDXOUMQJS-IZOCWOLQNA-N, BKUQJHGRQAJKGF-SSUGKINMNA-N, BSPSZEPKAICBKL-RUHWUQOPNA-N, BYDYPYMLNGCZMB-OCNLKIJ…	C59H100O5	1	M+Na	911.741		11.29	11.24	93.5484	8.29931	99.2366	100	0.336451	0.00216625	0.0425747	0.0749878	0.601995	0.993093	0.380475	0.179134	0.765052	0.0189673	0.870476	0.827025	0.139888	0.0250672	0.272606
3-Indoleacetonitrile	Indoles and derivatives	HILIC_PosMSMS_303			nonGL	2,2'-Bipyridine M+H HMDB --- 4,4'-Bipyridine M+H HMDB --- Indole-3-acetonitrile M+H NIST	Organoheterocyclic compounds	Indoles and derivatives	Indoles	HMDB0006524	3-Indoleacetonitrile								DMCPFOBLJMLSNX-UHFFFAOYSA-N, MWVTWFVJZLCBMC-UHFFFAOYSA-N, ROFVEXUMMXZLPA-UHFFFAOYSA-N	C10H8N2	1	M+H	157.076		10.85	10.84	91.0811	23.0595	100	100	0.323958	0.00228077	0.0436139	0.131778	0.342736	0.985013	0.361831	0.186738	0.765052	-0.058572	0.602543	0.779737	0.145975	0.0154588	0.250915
TAG 59:5	TAG	RP_PosMS1_1479		Y	GL	TG 10:0_11:0_38:5 M+NH4 Atlas --- TG 10:0_13:0_36:5 M+NH4 Atlas --- TG 10:0_13:1_36:4 M+NH4 Atlas --- TG 10:0_15:0_34:5 M+NH4 Atlas --- TG 10:0_15:1_34:4 M+NH4 Atlas --- TG 10:0_17:0_32:5 M+NH4 Atlas --- TG 10:0_17:1_32:4 M+NH4 Atlas --- TG 10:0_17:2_32:3 M+NH4 Atlas --- TG 10:0_18:5_31:0 M+NH4 Atlas --- TG 10:0_19:0_30:5 M+NH4 Atlas --- TG 10:0_19:1_30:4 M+NH4 Atlas --- TG 10:0_19:2_30:3 M+NH4 A…	Lipids and lipid-like molecules	Glycerolipids	Triradylcglycerols	HMDB0043131, HMDB0043719	TG(15:0/22:0/22:5(7Z,10Z,13Z,16Z,19Z)) --- TG(15:0/20:5(5Z,8Z,11Z,14Z,17Z)/24:0)	Glycerolipids [GL]	Triradylglycerols [GL03]	Triacylglycerols [GL0301]	LMGL03011202 --- LMGL03011203 --- LMGL03011204 --- LMGL03011249 --- LMGL03011260 --- LMGL03011271 --- LMGL03011301 --- LMGL03011358 --- LMGL03011363 --- LMGL03011364 --- LMGL03011403 --- LMGL03011406 --- LMGL03011458 --- LMGL03011519 --- LMGL03011604 --- LMGL03012976 --- LMGL03013139 --- LMGL03015339 --- LMGL03015346 --- LMGL03016270 --- LMGL03016336 --- LMGL03016576 --- LMGL03016600	TG(15:0/22:0/22:5(7Z,10Z,13Z,16Z,19Z))[iso6] --- TG(15:0/22:2(13Z,16Z)/22:3(10Z,13Z,16Z))[iso6] --- TG(15:1(9Z)/22:2(13Z,16Z)/22:2(13Z,16Z))[iso3] --- TG(16:0/21:0/22:5(7Z,10Z,13Z,16Z,19Z))[iso6] --- TG(17:0/20:0/22:5(7Z,10Z,13Z,16Z,19Z))[iso6] --- TG(17:0/20:2(11Z,14Z)/22:3(10Z,13Z,16Z))[iso6] --- TG(17:0/20:5(5Z,8Z,11Z,14Z,17Z)/22:0)[iso6] --- TG(17:1(9Z)/20:1(11Z)/22:3(10Z,13Z,16Z))[iso6] --- …	TG 59:5	TG 15:0_22:0_22:5 --- TG 15:0_22:2_22:3 --- TG 15:1_22:2_22:2 --- TG 16:0_21:0_22:5 --- TG 17:0_20:0_22:5 --- TG 17:0_20:2_22:3 --- TG 17:0_20:5_22:0 --- TG 17:1_20:1_22:3 --- TG 17:1_20:2_22:2 --- TG 17:2_20:0_22:3 --- TG 17:2_20:1_22:2 --- TG 17:2_20:2_22:1 --- TG 18:0_19:0_22:5 --- TG 18:0_20:5_21:0 --- TG 18:1_19:1_22:3 --- TG 18:2_19:0_22:3 --- TG 18:2_19:1_22:2 --- TG 18:3_19:0_22:2 --- TG …	AACNUIJGPOHYEH-XLNUGGJPNA-N, AATFMBDAEWQTBC-GXYQIZPENA-N, ADLATCWUQXOESM-HBSIXKEQNA-N, AELZCTOIXUMBTR-BXLTVEKMNA-N, AIXARSARMWOXFP-HKIAUUIONA-N, AJWDWNDNKKJPFP-ZBYKPJNINA-N, AOMBAEOTHSRLGD-NJFAVMRRNA-N, AQKXJPFAGUUKFP-NTMRYDSBNA-N, AQWLJZYQRHQDMG-UTTFEHMVNA-N, ARRQDNVVNVQHKQ-IVZDAQEWNA-N, AUSDKCJHXNLCGB-HVMPLNMBNA-N, AXZCKZFKTHAHGR-IBJMWNKNNA-N, AZOLNQPZSXEPSL-DSKNMILTNA-N, BAIUYCCBKJDWIR-CSKNZAD…	C62H110O6	1	M+NH4	968.863		12.21	12.18	59.1398	15.4508	83.9695	100	0.327143	0.00248657	0.046298	0.130567	0.355897	0.985013	0.383848	0.168754	0.765052	0.100286	0.380573	0.676013	0.147838	0.0160262	0.250915
TAG O-58:9	TAG-O	RP_PosMS1_1422		Y	GL	TG O-14:0_22:3_22:6 M+Na Atlas --- TG O-14:0_22:4_22:5 M+Na Atlas --- TG O-14:1_22:2_22:6 M+Na Atlas --- TG O-14:1_22:3_22:5 M+Na Atlas --- TG O-14:1_22:4_22:4 M+Na Atlas --- TG O-16:0_20:3_22:6 M+Na Atlas --- TG O-16:0_20:4_22:5 M+Na Atlas --- TG O-16:0_20:5_22:4 M+Na Atlas --- TG O-16:1_20:2_22:6 M+Na Atlas --- TG O-16:1_20:3_22:5 M+Na Atlas --- TG O-16:1_20:4_22:4 M+Na Atlas --- TG O-16:1_20:5…	Lipids and lipid-like molecules	Glycerolipids	Triradylcglycerols	HMDB0055788, HMDB0055878, HMDB0055940	TG(20:5(5Z,8Z,11Z,14Z,17Z)/20:4(8Z,11Z,14Z,17Z)/O-18:0) --- TG(22:5(7Z,10Z,13Z,16Z,19Z)/18:4(6Z,9Z,12Z,15Z)/O-18:0) --- TG(22:6(4Z,7Z,10Z,13Z,16Z,19Z)/18:3(9Z,12Z,15Z)/O-18:0)								ADMYHTWDKNKPAJ-YLGSSJGWNA-N, AEAVDCXAAAZLBC-VINQJJOINA-N, AGGFBECVGJVWJI-WOAPWCEUNA-N, AKMCQJGIKOEIQN-WIQNBVGQNA-N, AVERRGYIHJWCBI-OBWPFNMENA-N, AVFKTSLOGGRVBO-ZFFKCVPUNA-N, AWZBEIISONZXEX-VGVBBXLJNA-N, BTGKEDZHAIVUCG-GAZLOJNNNA-N, BTOMFMUVLKKGLF-JEFRKBQCNA-N, BUQNQSLFSXAANU-PAXXFZPHNA-N, BXESKBKTXJPEKZ-BNCNPHOVNA-N, CFKCRAVAUQEMNG-QTJRNQLMNA-N, CKNDGFMFRRZHTC-BSYWFEAVNA-N, CLWXISUTBSFHBA-SJTCMTC…	C61H102O5	1	M+Na	937.757		11.32	11.27	66.6667	21.3971	79.3893	100	0.332904	0.00264571	0.047998	-0.0285407	0.844037	0.993093	0.522463	0.0662637	0.765052	-0.0349569	0.765659	0.80554	0.125784	0.0463152	0.336408
PI 38:7	PI	RP_PosMS1_1340		Y	nonGL	PI 38:7 M+Na Atlas						Glycerophospholipids [GP]	Glycerophosphoinositols [GP06]	Diacylglycerophosphoinositols [GP0601]	LMGP06010869	PI(16:1(9Z)/22:6(4Z,7Z,10Z,13Z,16Z,19Z))	PI 38:7	PI 16:1_22:6	GROKQQJYJNMCSC-LSTLUVPYNA-N	C47H77O13P	1	M+Na	903.494		4.91	4.91	60.2151	21.6816	96.1832	100	0.337797	0.00280881	0.0496831	0.28339	0.0533886	0.985013	0.736138	0.010602	0.765052	0.0604221	0.613565	0.781338	0.198128	0.00181178	0.11744
Cer 40:0;O2	Cer	RP_PosMSMS_549		Y	nonGL	Cer 18:0;2O/22:0 M+H Atlas	Lipids and lipid-like molecules	Sphingolipids	Ceramides	HMDB0011765	Cer(d18:0/22:0)	Sphingolipids [SP]	Ceramides [SP02]	N-acylsphinganines (dihydroceramides) [SP0202]	LMSP02020010	Cer(d18:0/22:0)	Cer 40:0;O2	Cer 18:0;O2/22:0	SXPRAKSDHOEHIG-UHFFFAOYNA-N	C40H81NO3	1	M+H	624.625		8.51	8.48	87.9032	17.5977	100	100	0.328457	0.0029772	0.0513771	0.0204309	0.887796	0.997945	0.204248	0.475085	0.765052	0.0303195	0.795637	0.812881	0.118114	0.0611489	0.336408
TAG 61:6	TAG	RP_PosMS1_1531		Y	GL	TG 10:0_13:0_38:6 M+NH4 Atlas --- TG 10:0_13:1_38:5 M+NH4 Atlas --- TG 10:0_15:0_36:6 M+NH4 Atlas --- TG 10:0_15:1_36:5 M+NH4 Atlas --- TG 10:0_17:0_34:6 M+NH4 Atlas --- TG 10:0_17:1_34:5 M+NH4 Atlas --- TG 10:0_17:2_34:4 M+NH4 Atlas --- TG 10:0_19:0_32:6 M+NH4 Atlas --- TG 10:0_19:1_32:5 M+NH4 Atlas --- TG 10:0_19:2_32:4 M+NH4 Atlas --- TG 10:0_21:0_30:6 M+NH4 Atlas --- TG 10:0_21:1_30:5 M+NH4 A…	Lipids and lipid-like molecules	Glycerolipids	Triradylcglycerols	HMDB0043777	TG(15:0/22:6(4Z,7Z,10Z,13Z,16Z,19Z)/24:0)	Glycerolipids [GL]	Triradylglycerols [GL03]	Triacylglycerols [GL0301]	LMGL03011720 --- LMGL03011791 --- LMGL03011844 --- LMGL03011855 --- LMGL03011890 --- LMGL03011891 --- LMGL03011897 --- LMGL03011901 --- LMGL03011908 --- LMGL03011928 --- LMGL03011996 --- LMGL03012021 --- LMGL03012032 --- LMGL03016062 --- LMGL03016648 --- LMGL03016713 --- LMGL03016734 --- LMGL03016758	TG(17:0/22:0/22:6(4Z,7Z,10Z,13Z,16Z,19Z))[iso6] --- TG(17:0/22:1(13Z)/22:5(7Z,10Z,13Z,16Z,19Z))[iso6] --- TG(17:0/22:3(10Z,13Z,16Z)/22:3(10Z,13Z,16Z))[iso3] --- TG(17:1(9Z)/22:0/22:5(7Z,10Z,13Z,16Z,19Z))[iso6] --- TG(17:1(9Z)/22:2(13Z,16Z)/22:3(10Z,13Z,16Z))[iso6] --- TG(17:2(9Z,12Z)/22:1(13Z)/22:3(10Z,13Z,16Z))[iso6] --- TG(17:2(9Z,12Z)/22:2(13Z,16Z)/22:2(13Z,16Z))[iso3] --- TG(18:0/21:0/22:6(4Z…	TG 61:6	TG 17:0_22:0_22:6 --- TG 17:0_22:1_22:5 --- TG 17:0_22:3_22:3 --- TG 17:1_22:0_22:5 --- TG 17:1_22:2_22:3 --- TG 17:2_22:1_22:3 --- TG 17:2_22:2_22:2 --- TG 18:0_21:0_22:6 --- TG 18:1_21:0_22:5 --- TG 18:3_21:0_22:3 --- TG 18:4_21:0_22:2 --- TG 19:0_20:0_22:6 --- TG 19:0_20:1_22:5 --- TG 19:0_20:5_22:1 --- TG 19:1_20:0_22:5 --- TG 19:1_20:2_22:3 --- TG 19:1_20:5_22:0 --- TG 20:1_20:5_21:0	ABDWFJAVZLVJCV-XGJYAVPSNA-N, ACQVTLBYTPWPQM-DXNNEYAONA-N, AEHFUZWVAKBISK-QHPXFDACNA-N, AEJSHIKLOVBVDB-LSYJYILLNA-N, AFOPVHQTORRFSI-ZYJGALPFNA-N, AJMKJUMUDNSNAK-KVDLIKLXNA-N, AJRDNYWRANQDLP-UERMBPGQNA-N, ALWTUZZRQWWZMC-NBGHCZFUNA-N, ANERYYPEFQHQLC-VCNAFCDVNA-N, ANWOISFNFMVXHA-HYIVDKTLNA-N, ARTVPFANQHOOBK-VJEFUCHJNA-N, AULREUVYAVFSKG-ULERDAIYNA-N, AVSANCSYPWUUFT-USWKLIDSNA-N, AWDDPCUICBWASR-FRNOTRN…	C64H112O6	1	M+NH4	994.878		12.24	12.21	65.3226	14.7058	93.8931	100	0.323352	0.0031548	0.0531456	0.0572291	0.689679	0.993093	0.374123	0.185032	0.765052	0.0437065	0.70607	0.795815	0.131993	0.0341366	0.307591
PC O-42:5	PC-O	RP_NegMSMS_735		Y	nonGL	PC O-22:1_20:4 M+HCOO Atlas													RKYSEMIYABTQRA-FNDBXICPNA-N	C50H92NO7P	2	M+HCOO	894.66	303.23	7.72	7.7	38.2749	10.9171	91.6031	100	-0.328557	0.00337619	0.0555525	-0.0406997	0.781392	0.993093	-0.194057	0.50299	0.765052	-0.13412	0.256594	0.634287	-0.121556	0.0570621	0.336408
TAG 60:2	TAG	RP_PosMSMS_1517		Y	GL	TG 18:1_18:1_24:0 M+NH4 Atlas	Lipids and lipid-like molecules	Glycerolipids	Triradylcglycerols	HMDB0047249	TG(24:0/18:1(9Z)/18:1(9Z))								OZGHAUBMNCOWIH-NNBGLWHGNA-N	C63H118O6	1	M+NH4	988.92		12.22	12.21	53.7634	17.1638	81.6794	100	0.320694	0.0039709	0.0627853	0.0690676	0.635044	0.993093	0.369665	0.197256	0.765052	0.107222	0.361385	0.67255	0.133217	0.0352654	0.308346
TAG O-56:3	TAG-O	RP_PosMS1_1388		Y	GL	TG O-12:0_22:0_22:3 M+Na Atlas --- TG O-12:0_22:1_22:2 M+Na Atlas --- TG O-14:0_20:0_22:3 M+Na Atlas --- TG O-14:0_20:1_22:2 M+Na Atlas --- TG O-14:0_20:2_22:1 M+Na Atlas --- TG O-14:0_20:3_22:0 M+Na Atlas --- TG O-14:1_20:0_22:2 M+Na Atlas --- TG O-14:1_20:1_22:1 M+Na Atlas --- TG O-14:1_20:2_22:0 M+Na Atlas --- TG O-16:0_18:0_22:3 M+Na Atlas --- TG O-16:0_18:1_22:2 M+Na Atlas --- TG O-16:0_18:2…	Lipids and lipid-like molecules	Glycerolipids	Triradylcglycerols	HMDB0046100, HMDB0050603, HMDB0053406, HMDB0054430	TG(20:0/18:3(9Z,12Z,15Z)/O-18:0) --- TG(20:1(11Z)/18:2(9Z,12Z)/O-18:0) --- TG(20:2n6/18:1(9Z)/O-18:0) --- TG(22:2(13Z,16Z)/16:1(9Z)/O-18:0)								AAHPRUQZWPZDRB-AAAXEXNWNA-N, AHUFRKBETRNFLG-XMIRUKSINA-N, AINNJIXNHXQQPO-FBSASISJNA-N, ALUNDQOCOPLAGU-CABVQDRLNA-N, APCABSLXIWMAIX-DTCBDFKONA-N, BEGBSPNVQBKYLA-ZANZXPJANA-N, BKYXFNVWVOQQKO-QFZOFJKBNA-N, BNFCCSCFHJBERU-WVHHBBJNNA-N, BPFVBXZAZWQDEW-RCQBHHHZNA-N, DBYQQXUGLGEBOP-LVPVOZJANA-N, DOHPMLIJQFUHEB-QYEDFDFXNA-N, DQUSNTKSKBBSBY-CDSZRSJPNA-N, DWRRQDXOTGOZNJ-KOBMRKPMNA-N, FAKMBWCXDPUAJF-UNMLGJO…	C59H110O5	1	M+Na	921.821		11.91	11.92	45.9677	22.4002	91.6031	100	0.323469	0.00400372	0.0627853	0.302402	0.037545	0.985013	0.169671	0.55902	0.765052	0.033351	0.778949	0.809065	0.16928	0.00763628	0.245949
PC 34:0	PC	RP_Pos, RP_NegMSMS_892, 568		Y	nonGL	PC 17:0_17:0 M+H Atlas, PC 16:0_18:0 M+HCOO Atlas	Lipids and lipid-like molecules	Glycerophospholipids	Glycerophosphocholines	HMDB0007970	PC(16:0/18:0)	Glycerophospholipids [GP]	Glycerophosphocholines [GP01]	Diacylglycerophosphocholines [GP0101]	LMGP01010707, LMGP01010573	PC(17:0/17:0), PC(16:0/18:0)	PC 34:0	PC 17:0/17:0, PC 16:0_18:0	RTWAYAIMWLNAJW-UHFFFAOYNA-N, PZNPLUBHRSSFHT-UHFFFAOYNA-N	C42H84NO8P	1, 2	M+H, M+HCOO	762.5961, 806.591	283.262	6.99	6.965	70.1613	6.99428	99.2366	100	0.310116	0.00408197	0.0627853	0.00505225	0.971458	0.998614	0.0768275	0.78315	0.765052	-0.113581	0.318601	0.654154	0.103038	0.0944904	0.363954
TAG 53:2	TAG	RP_PosMSMS_1310, 1325		Y	GL	TG 17:0_18:1_18:1 M+NH4 Atlas, TG 17:0_18:1_18:1 M+Na Atlas	Lipids and lipid-like molecules	Glycerolipids	Triradylcglycerols	HMDB0062701	TG(17:0/18:1(9Z)/18:1(9Z))	Glycerolipids [GL]	Triradylglycerols [GL03]	Triacylglycerols [GL0301]	LMGL03010138	TG(17:0/18:1(9Z)/18:1(9Z))[iso3]	TG 53:2	TG 17:0_18:1_18:1	ANBFFIILUQJIQL-RZEXXKRKNA-N	C56H104O6	2	M+NH4, M+Na	890.8109, 895.7664	265.2507, 603.5379	11.27	11.24	88.4409	14.4142	98.4733	100	0.306825	0.00468631	0.070547	-0.0242219	0.864346	0.993093	0.288326	0.302462	0.765052	-0.0289487	0.800609	0.813146	0.106789	0.0842192	0.363249
PC 37:1	PC	RP_PosMSMS_1031		Y	nonGL	PC 19:0_18:1 M+H Atlas						Glycerophospholipids [GP]	Glycerophosphocholines [GP01]	Diacylglycerophosphocholines [GP0101]	LMGP01011738	PC(19:0/18:1(9Z))	PC 37:1	PC 18:1_19:0	WMCPHMOQTITNBG-LNVKXUELNA-N	C45H88NO8P	1	M+H	802.629		7.43	7.42	61.5591	27.6251	82.4427	100	0.303417	0.00521742	0.0760828	0.111294	0.432074	0.985013	0.320897	0.251113	0.765052	0.061365	0.592425	0.773359	0.133489	0.0302888	0.305104
Thiamine	Vitamins and cofactors	HILIC_PosMS1_774			nonGL	Thiamine M+H HMDB --- Thiamine cation Cat NIST --- Thiamine; LC-ESI-QTOF; MS2; CE M MassBank	Organoheterocyclic compounds	Diazines	Pyrimidines and pyrimidine derivatives	HMDB0000235	Thiamine								JZRWCGZRTZMZEH-UHFFFAOYSA-N	C12H17N4OS	1	Cat --- M --- M+H	265.107		1.35	1.42	20	10.3051	43.609	100	0.31366	0.00529427	0.0760828	0.148932	0.309433	0.985013	0.319564	0.269817	0.765052	-0.214081	0.0691673	0.468765	0.143937	0.0239343	0.272606
TAG 58:1	TAG	RP_PosMSMS_1467		Y	GL	TG 16:0_18:1_24:0 M+NH4 Atlas	Lipids and lipid-like molecules	Glycerolipids	Triradylcglycerols	HMDB0044113	TG(16:0/18:1(9Z)/24:0)								DFSTYDOPXLRTDY-MKFPQRGTNA-N	C61H116O6	1	M+NH4	962.904		12.19	12.14	55.3763	23.7266	75.5725	100	0.306004	0.00558008	0.0760828	0.0634652	0.65963	0.993093	0.341746	0.228908	0.765052	0.135403	0.243793	0.627436	0.126101	0.0443665	0.336408
PI 32:0	PI	HILIC_NegMS1_1380		Y	nonGL	PI 10:0_22:0 M-H Atlas --- PI 11:0_21:0 M-H Atlas --- PI 12:0_20:0 M-H Atlas --- PI 13:0_19:0 M-H Atlas --- PI 14:0_18:0 M-H Atlas --- PI 15:0_17:0 M-H Atlas --- PI 16:0_16:0 M-H Atlas --- PI 5:0_27:0 M-H Atlas --- PI 6:0_26:0 M-H Atlas --- PI 7:0_25:0 M-H Atlas --- PI 8:0_24:0 M-H Atlas --- PI 9:0_23:0 M-H Atlas	Lipids and lipid-like molecules	Glycerophospholipids	Glycerophosphoinositols	HMDB0009778	PI(16:0/16:0)	Glycerophospholipids [GP]	Glycerophosphoinositols [GP06]	Diacylglycerophosphoinositols [GP0601]	LMGP06010007 --- LMGP06010887 --- LMGP06010900 --- LMGP06010906 --- LMGP06010911	PI(12:0/20:0) --- PI(13:0/19:0) --- PI(14:0/18:0) --- PI(15:0/17:0) --- PI(16:0/16:0)	PI 32:0	PI 12:0_20:0 --- PI 13:0_19:0 --- PI 14:0_18:0 --- PI 15:0_17:0 --- PI 16:0/16:0	CCCYPRQZOBFSNC-UHFFFAOYNA-N, CVDPQUBHCRINCI-UHFFFAOYNA-N, HGMJKQVBMDAKFH-UHFFFAOYNA-N, IBUKXRINTKQBRQ-UHFFFAOYNA-N, KWJHKZHKAHHGDU-UHFFFAOYNA-N, MFYAKQMLHXHCBV-UHFFFAOYNA-N, NUGUSPXLSPKPRZ-UHFFFAOYNA-N, QQKIHPFWUGGRSK-UHFFFAOYNA-N, WCTRXHKQNUVXTR-UHFFFAOYNA-N, YEKHYFBWESKKMV-UHFFFAOYNA-N, YQLFPOXPQXRCOP-UHFFFAOYNA-N, ZTKYYVQYUMMCCL-UHFFFAOYNA-N	C41H79O13P	1	M-H	809.511		9.11	9.21	23.8482	18.6903	55.6391	100	0.308332	0.0056013	0.0760828	0.252375	0.0801266	0.985013	0.260143	0.364328	0.765052	0.0309073	0.792491	0.81265	0.159291	0.0112597	0.245949
TAG 46:1	TAG	RP_PosMSMS_1005		Y	GL	TG 12:0_16:0_18:1 M+NH4 Atlas --- TG 14:0_16:0_16:1 M+NH4 Atlas	Lipids and lipid-like molecules	Glycerolipids	Triradylcglycerols	HMDB0042129	TG(14:0/16:0/16:1(9Z))	Glycerolipids [GL]	Triradylglycerols [GL03]	Triacylglycerols [GL0301]	LMGL03013326 --- LMGL03014221	TG(12:0/16:0/18:1(9Z))[iso6] --- TG(14:0/16:0/16:1(9Z))[iso6]	TG 46:1	TG 12:0_16:0_18:1 --- TG 14:0_16:0_16:1	JYICXCHHKWVGEI-QOCHGBHMNA-N, KKDKCSAJJXXLKK-VHXPQNKSNA-N	C49H92O6	2	M+NH4	794.717	577.516	10.4	10.37	93.0108	17.7014	99.2366	100	0.297555	0.00569859	0.0760828	0.0683547	0.626461	0.993093	0.337452	0.222843	0.765052	0.0723413	0.523895	0.737485	0.124156	0.0422152	0.335464
Ciliatine	Other organic acids and derivatives	HILIC_PosMSMS_695			nonGL	2-Aminoethylphosphonic acid 2M+H NIST --- Diphenyl phosphate M+H HMDB	Organic acids and derivatives	Organic phosphonic acids and derivatives	Organic phosphonic acids	HMDB0011747	Ciliatine								ASMQGLCHMVWBQR-UHFFFAOYSA-N, QQVDJLLNRSOCEL-UHFFFAOYSA-N	C12H11O4P, C2H8NO3P	1	2M+H --- M+H	251.047		7	6.97	48.1081	6.55613	30.0752	100	0.305331	0.00569924	0.0760828	0.0184082	0.898415	0.997945	0.177224	0.53383	0.765052	0.108833	0.349516	0.669896	0.10906	0.0829051	0.363249
LPC O-18:1	LPC-O	RP_Pos, RP_NegMSMS_377, 405, 170		Y	nonGL	LPC O-18:1 M+H Atlas, 1-(1Z-Octadecenyl)-sn-glycero-3-phosphocholine M+Na NIST, LPC O-18:1 M+HCOO Atlas	Lipids and lipid-like molecules	Glycerophospholipids	Glycerophosphocholines	HMDB0013122	LysoPC(P-18:0/0:0)	Glycerophospholipids [GP]	Glycerophosphocholines [GP01]	Monoalkylglycerophosphocholines [GP0106], 1Z-alkenylglycerophosphocholines [GP0107]	LMGP01060039, LMGP01070009	PC(O-18:1(9Z)/0:0), PC(P-18:0/0:0)	LPC O-18:1	LPC O-18:1, LPC P-18:0	XWYSLMAMRKYUFH-SEYXRHQNNA-N, WBOMIOWRFSPZMC-AYICAFKVSA-N	C26H54NO6P	1, 2	M+H, M+Na, M+HCOO	508.3741, 530.3552, 552.3671	492.349	3.19	3.17	67.7419	7.10635	100	100	-0.293916	0.00587869	0.0770252	0.00105688	0.993946	0.998614	-0.454714	0.0964387	0.765052	-0.175441	0.117034	0.517286	-0.115391	0.0571494	0.336408
Bilirubin	Bilirubins	RP_Pos, RP_NegMSMS_488, 194			nonGL	Bilirubin M+H HMDB, Bilirubin M-H HMDB	Organoheterocyclic compounds	Tetrapyrroles and derivatives	Bilirubins	HMDB0000054	Bilirubin								BPYKTIZUTYGOLE-IFADSCNNSA-N	C33H36N4O6	1, 2	M+H, M-H	585.2682, 583.2562	285.124	2.24	2.24	53.2258	27.3063	96.9466	100	0.29625	0.00617158	0.0783263	0.140301	0.319166	0.985013	0.50041	0.0707364	0.765052	-0.0780105	0.493875	0.721104	0.145686	0.01724	0.250915
TAG O-58:3	TAG-O	RP_PosMS1_1442		Y	GL	TG O-14:0_22:0_22:3 M+Na Atlas --- TG O-14:0_22:1_22:2 M+Na Atlas --- TG O-14:1_22:0_22:2 M+Na Atlas --- TG O-14:1_22:1_22:1 M+Na Atlas --- TG O-16:0_20:0_22:3 M+Na Atlas --- TG O-16:0_20:1_22:2 M+Na Atlas --- TG O-16:0_20:2_22:1 M+Na Atlas --- TG O-16:0_20:3_22:0 M+Na Atlas --- TG O-16:1_20:0_22:2 M+Na Atlas --- TG O-16:1_20:1_22:1 M+Na Atlas --- TG O-16:1_20:2_22:0 M+Na Atlas --- TG O-16:2_20:0…	Lipids and lipid-like molecules	Glycerolipids	Triradylcglycerols	HMDB0046855, HMDB0051679, HMDB0053419, HMDB0054450	TG(22:0/18:3(9Z,12Z,15Z)/O-18:0) --- TG(22:1(13Z)/18:2(9Z,12Z)/O-18:0) --- TG(20:2n6/20:1(11Z)/O-18:0) --- TG(22:2(13Z,16Z)/18:1(9Z)/O-18:0)								ABVCOORPKUHHNN-CRNCYVPCNA-N, AEOBRAGXLFVMRE-BDWBEEGCNA-N, AFWWFFQZFOZUDD-VAFHZOLMNA-N, AUTVNMLGOYLSCB-MANIEBBANA-N, AXQZIDAHUPFLNV-BQWKMGCYNA-N, BNLJCWOAPZWGQQ-XZCYIYCCNA-N, BZBAXXXOFRTDGF-NNTPHPOUNA-N, BZHGXRMUBRCBRO-CLLPMJJLNA-N, CBHKUCNGFZXNNP-SOZUMBFYNA-N, CDTQUWZEKRWTOA-IQETWBMLNA-N, CHNCVAPAHUQOAF-YNBUDPQPNA-N, CHRFGHMAUFIWSU-IUPFWZBJNA-N, CNKPNKOCHWPXLS-ZBYKIPMZNA-N, DBOVCXYNMPCUKX-SEQMTPS…	C61H114O5	1	M+Na	949.852		12.16	12.14	56.1828	14.6452	96.9466	100	0.308044	0.0061994	0.0783263	0.343447	0.0177269	0.985013	0.277026	0.339078	0.765052	0.0559576	0.637336	0.785372	0.177621	0.00501136	0.2331
DAG 34:1	DAG	RP_PosMSMS_500, 522, 528		Y	GL	1-Palmitoyl-2-oleoyl-sn-glycerol M+H NIST, DG 16:0_18:1 M+NH4 Atlas, 1-Palmitoyl-2-oleoyl-sn-glycerol M+Na NIST --- TG O-8:0_8:0_18:1 M+Na Atlas	Lipids and lipid-like molecules	Glycerolipids	Diradylglycerols	HMDB0007102, HMDB0242173	DG(16:0/18:1(9Z)/0:0) --- Diacylglycerol	Glycerolipids [GL]	Diradylglycerols [GL02]	Diacylglycerols [GL0201]	LMGL02010006	DG(16:0/18:1(9Z)/0:0)	DG 34:1	DG 16:0_18:1	YEJYLHKQOBOSCP-OZKTZCCCSA-N, YEJYLHKQOBOSCP-ZCXUNETKNA-N, BKBBVLZTZAFJSN-HNENSFHCNA-N, YEJYLHKQOBOSCP-OZKTZCCCSA-N	C37H70O5	1, 2	M+H, M+NH4, M+Na	595.5256, 612.5527, 617.5083	339.293	7.66	7.64	100	9.76369	100	100	0.293837	0.00681438	0.0845857	0.0648834	0.646795	0.993093	0.337557	0.226501	0.765052	0.107034	0.349035	0.669896	0.122313	0.0472495	0.336408
TAG 53:3	TAG	RP_PosMSMS_1302		Y	GL	TG 17:0_18:1_18:2 M+NH4 Atlas --- TG 17:1_18:1_18:1 M+NH4 Atlas						Glycerolipids [GL]	Triradylglycerols [GL03]	Triacylglycerols [GL0301]	LMGL03010161 --- LMGL03010164	TG(17:0/18:1(9Z)/18:2(9Z,12Z))[iso6] --- TG(17:1(9Z)/18:1(9Z)/18:1(9Z))[iso3]	TG 53:3	TG 17:0_18:1_18:2 --- TG 17:1_18:1_18:1	NIBMDPFMDDQNNX-KYDHCSDMNA-N, ZNQBEJJYVJSZLM-NRRKBIGSNA-N	C56H102O6	1	M+NH4	888.795		11	10.99	86.0215	7.25608	97.7099	100	0.296982	0.00696843	0.0850066	0.0291627	0.839021	0.993093	0.248858	0.379768	0.765052	-0.0896872	0.439056	0.695343	0.11203	0.0734588	0.363035
PC O-38:6	PC-O	RP_Neg, RP_PosMSMS_645, 995		Y	nonGL	PC O-18:2_20:4 M+HCOO Atlas, Docosahexaenoyl PAF C-16 M+H NIST --- PC O-38:6 M+H Atlas	Lipids and lipid-like molecules	Glycerophospholipids	Glycerophosphocholines	HMDB0013409	PC(O-16:0/22:6(4Z,7Z,10Z,13Z,16Z,19Z))	Glycerophospholipids [GP]	Glycerophosphocholines [GP01]	1-alkyl,2-acylglycerophosphocholines [GP0102]	LMGP01020064	PC(O-16:0/22:6(4Z,7Z,10Z,13Z,16Z,19Z))	PC O-38:6	PC O-16:0/22:6	BOHZCIJMIPHZKG-OANVIGDONA-N, LYVCXQZOQYYLAM-YQIZYYBANA-N, QQQQNYAHSSIZBU-HIQXTUQZSA-N	C46H82NO7P	1	M+HCOO, M+H	836.5809, 792.5849		6.195	6.19	54.1779	25.1515	100	100	0.302639	0.00728352	0.0873444	0.136859	0.351057	0.985013	0.153181	0.598136	0.765052	-0.0501339	0.673194	0.785957	0.129895	0.0423019	0.335464
PC O-36:5	PC-O	RP_PosMSMS_905	RT_1	Y	nonGL	Eicosapentaenoyl PAF C-16 M+H NIST	Lipids and lipid-like molecules	Glycerophospholipids	Glycerophosphocholines	HMDB0039528	PC(O-16:0/20:5(5Z,8Z,11Z,14Z,17Z))	Glycerophospholipids [GP]	Glycerophosphocholines [GP01]	1-alkyl,2-acylglycerophosphocholines [GP0102]	LMGP01020058	PC(O-16:0/20:5(5Z,8Z,11Z,14Z,17Z))	PC O-36:5	PC O-16:0/20:5	YHSSHPWVFALMBA-IARQOZKNSA-N	C44H80NO7P	1	M+H	766.571		6.16	6.16	42.4731	8.69052	100	100	0.298892	0.0076224	0.0898847	0.103742	0.476974	0.985013	0.199159	0.489928	0.765052	-0.113021	0.337427	0.66696	0.124583	0.0500272	0.336408
TAG O-58:8	TAG-O	RP_PosMS1_1425		Y	GL	TG O-14:0_22:2_22:6 M+Na Atlas --- TG O-14:0_22:3_22:5 M+Na Atlas --- TG O-14:0_22:4_22:4 M+Na Atlas --- TG O-14:1_22:1_22:6 M+Na Atlas --- TG O-14:1_22:2_22:5 M+Na Atlas --- TG O-14:1_22:3_22:4 M+Na Atlas --- TG O-16:0_20:2_22:6 M+Na Atlas --- TG O-16:0_20:3_22:5 M+Na Atlas --- TG O-16:0_20:4_22:4 M+Na Atlas --- TG O-16:0_20:5_22:3 M+Na Atlas --- TG O-16:1_20:1_22:6 M+Na Atlas --- TG O-16:1_20:2…	Lipids and lipid-like molecules	Glycerolipids	Triradylcglycerols	HMDB0055665, HMDB0055875, HMDB0055924	TG(20:4(8Z,11Z,14Z,17Z)/20:4(8Z,11Z,14Z,17Z)/O-18:0) --- TG(22:5(7Z,10Z,13Z,16Z,19Z)/18:3(9Z,12Z,15Z)/O-18:0) --- TG(22:6(4Z,7Z,10Z,13Z,16Z,19Z)/18:2(9Z,12Z)/O-18:0)								AHHJCCMBNSDNSM-OSECODGINA-N, ARBXTMKJIREHPF-HCFRXQNUNA-N, ASFUUOMDRHYQBB-QOCIHODJNA-N, ASWWTNDDOJYMOI-ZOQIHZJFNA-N, ATEIXYXYOPYTPF-VITKEJEQNA-N, AURMEAUNTNUNLD-ODZMZKPZNA-N, AWCMKHXLMDRCAR-XECXVXQNNA-N, BBRGEZIQKKCCEK-UJTXMOLFNA-N, BFDDQHXIBZGNEI-FQPFWEJJNA-N, BLICQCDAUJDWPA-OSTOHTDPNA-N, BPDDMFJNGICJTB-VUSPYMQXNA-N, BPYAYANMJZFOSF-RSHDGKHENA-N, BTZYNOJSVMZPNZ-WYJGHMEUNA-N, BXFYVQIDKGQCHV-QSSQYJF…	C61H104O5	1	M+Na	939.772		11.56	11.53	83.6022	7.58561	97.7099	100	0.286638	0.00812597	0.0942521	0.11506	0.414271	0.985013	0.505068	0.0680723	0.765052	0.0465392	0.683347	0.786097	0.137996	0.0242718	0.272606
TAG 61:7	TAG	RP_PosMS1_1527		Y	GL	TG 10:0_13:0_38:7 M+NH4 Atlas --- TG 10:0_13:1_38:6 M+NH4 Atlas --- TG 10:0_15:0_36:7 M+NH4 Atlas --- TG 10:0_15:1_36:6 M+NH4 Atlas --- TG 10:0_17:0_34:7 M+NH4 Atlas --- TG 10:0_17:1_34:6 M+NH4 Atlas --- TG 10:0_17:2_34:5 M+NH4 Atlas --- TG 10:0_19:0_32:7 M+NH4 Atlas --- TG 10:0_19:1_32:6 M+NH4 Atlas --- TG 10:0_19:2_32:5 M+NH4 Atlas --- TG 10:0_21:0_30:7 M+NH4 Atlas --- TG 10:0_21:1_30:6 M+NH4 A…						Glycerolipids [GL]	Triradylglycerols [GL03]	Triacylglycerols [GL0301]	LMGL03011790 --- LMGL03011912 --- LMGL03011956 --- LMGL03011957 --- LMGL03011962 --- LMGL03011966 --- LMGL03011967 --- LMGL03011973 --- LMGL03012001 --- LMGL03012017 --- LMGL03012081 --- LMGL03012092 --- LMGL03016141 --- LMGL03016649 --- LMGL03016714 --- LMGL03016725	TG(17:0/22:1(13Z)/22:6(4Z,7Z,10Z,13Z,16Z,19Z))[iso6] --- TG(17:0/22:2(13Z,16Z)/22:5(7Z,10Z,13Z,16Z,19Z))[iso6] --- TG(17:1(9Z)/22:0/22:6(4Z,7Z,10Z,13Z,16Z,19Z))[iso6] --- TG(17:1(9Z)/22:1(13Z)/22:5(7Z,10Z,13Z,16Z,19Z))[iso6] --- TG(17:1(9Z)/22:3(10Z,13Z,16Z)/22:3(10Z,13Z,16Z))[iso3] --- TG(17:2(9Z,12Z)/22:0/22:5(7Z,10Z,13Z,16Z,19Z))[iso6] --- TG(17:2(9Z,12Z)/22:2(13Z,16Z)/22:3(10Z,13Z,16Z))[iso6]…	TG 61:7	TG 17:0_22:1_22:6 --- TG 17:0_22:2_22:5 --- TG 17:1_22:0_22:6 --- TG 17:1_22:1_22:5 --- TG 17:1_22:3_22:3 --- TG 17:2_22:0_22:5 --- TG 17:2_22:2_22:3 --- TG 18:1_21:0_22:6 --- TG 18:2_21:0_22:5 --- TG 18:4_21:0_22:3 --- TG 19:0_20:1_22:6 --- TG 19:0_20:2_22:5 --- TG 19:0_20:5_22:2 --- TG 19:1_20:0_22:6 --- TG 19:1_20:1_22:5 --- TG 20:2_20:5_21:0	ABBHQOIQGDETRA-GKSCYKEZNA-N, ABIPWJSRRKBDQO-PHJVTSRLNA-N, ACAKRUMBINKMOX-OTGVAUOANA-N, ACHZKNZKPXYGKF-LWQHXZPXNA-N, AFYJDAJTMOVFAZ-PRBLUXKINA-N, AHFLSUIBBZHODN-GAOPFFRGNA-N, AHKWCYUWPICJFH-PCIBTXFZNA-N, AJDPJFQTPOMLOY-YBPZTCPRNA-N, AKJWDEBKLKRFKI-KSUWDMFLNA-N, ALNDTFOSUWVJNH-VCKIMXBLNA-N, AMXJPWOUJZKNMH-AHYAVOPWNA-N, AQKSMROJLIALGO-YLXIJUMINA-N, AQSSYLGSVSAYCG-KFCKVWTONA-N, AUBAYVLKUXWECX-BJWGETS…	C64H110O6	1	M+NH4	992.863		12.04	11.98	66.9355	8.68937	97.7099	100	0.290654	0.0086645	0.0988775	0.0258525	0.857799	0.993093	0.426221	0.133013	0.765052	-0.013827	0.905656	0.832797	0.118146	0.0601434	0.336408
TAG 58:2	TAG	RP_PosMSMS, MS1_1464, 1473		Y	GL	TG 16:0_18:1_24:1 M+NH4 Atlas --- TG 18:0_18:2_22:0 M+NH4 Atlas --- TG 18:1_18:1_22:0 M+NH4 Atlas, TG 10:0_10:0_38:2 M+Na Atlas --- TG 10:0_12:0_36:2 M+Na Atlas --- TG 10:0_14:0_34:2 M+Na Atlas --- TG 10:0_14:1_34:1 M+Na Atlas --- TG 10:0_16:0_32:2 M+Na Atlas --- TG 10:0_16:1_32:1 M+Na Atlas --- TG 10:0_16:2_32:0 M+Na Atlas --- TG 10:0_17:2_31:0 M+Na Atlas --- TG 10:0_18:0_30:2 M+Na Atlas --- TG …	Lipids and lipid-like molecules	Glycerolipids	Triradylcglycerols	HMDB0045075, HMDB0046511, HMDB0005407, HMDB0005450, HMDB0005467, HMDB0042231, HMDB0042464, HMDB0042577, HMDB0043959, HMDB0044148, HMDB0044253, HMDB0044308, HMDB0044766, HMDB0044790, HMDB0044948, HMDB0045075, HMDB0045592, HMDB0046534, HMDB0047270, HMDB0047845, HMDB0048506	TG(18:0/20:1(11Z)/20:1(11Z)) --- TG(18:1(9Z)/20:0/20:1(11Z)) --- TG(18:2(9Z,12Z)/20:0/20:0) --- TG(14:0/22:0/22:2(13Z,16Z)) --- TG(14:0/22:1(13Z)/22:1(13Z)) --- TG(14:0/20:2n6/24:0) --- TG(16:0/20:0/22:2(13Z,16Z)) --- TG(16:0/20:1(11Z)/22:1(13Z)) --- TG(16:0/18:2(9Z,12Z)/24:0) --- TG(16:0/20:2n6/22:0) --- TG(18:0/18:0/22:2(13Z,16Z)) --- TG(18:0/20:0/20:2n6) --- TG(18:0/18:1(9Z)/22:1(13Z)) --- TG(…	Glycerolipids [GL]	Triradylglycerols [GL03]	Triacylglycerols [GL0301]	LMGL03010897 --- LMGL03010898, LMGL03010717 --- LMGL03010719 --- LMGL03010720 --- LMGL03010725 --- LMGL03010892 --- LMGL03010893 --- LMGL03010897 --- LMGL03010899 --- LMGL03010900 --- LMGL03010904 --- LMGL03010934 --- LMGL03010957 --- LMGL03010958 --- LMGL03010959 --- LMGL03010967 --- LMGL03010973 --- LMGL03010983 --- LMGL03010988 --- LMGL03011059 --- LMGL03011107 --- LMGL03013123 --- LMGL0301455…	TG(18:0/18:2(9Z,12Z)/22:0)[iso6] --- TG(18:1(9Z)/18:1(9Z)/22:0)[iso3], TG(14:0/22:0/22:2(13Z,16Z))[iso6] --- TG(15:0/21:0/22:2(13Z,16Z))[iso6] --- TG(16:0/20:0/22:2(13Z,16Z))[iso6] --- TG(16:0/20:1(11Z)/22:1(13Z))[iso6] --- TG(16:0/20:2(11Z,14Z)/22:0)[iso6] --- TG(16:1(9Z)/20:0/22:1(13Z))[iso6] --- TG(16:1(9Z)/20:1(11Z)/22:0)[iso6] --- TG(17:0/19:0/22:2(13Z,16Z))[iso6] --- TG(17:0/20:2(11Z,14Z)/2…	TG 58:2	TG 18:0_18:2_22:0 --- TG 18:1_18:1_22:0, TG 14:0_22:0_22:2 --- TG 15:0_21:0_22:2 --- TG 16:0_20:0_22:2 --- TG 16:0_20:1_22:1 --- TG 16:0_20:2_22:0 --- TG 16:1_20:0_22:1 --- TG 16:1_20:1_22:0 --- TG 17:0_19:0_22:2 --- TG 17:0_20:2_21:0 --- TG 17:1_19:0_22:1 --- TG 17:1_19:1_22:0 --- TG 17:1_20:1_21:0 --- TG 17:2_19:0_22:0 --- TG 17:2_20:0_21:0 --- TG 18:0_18:0_22:2 --- TG 18:0_18:1_22:1 --- TG 18:…	AQSCWFJEOVTYLU-AMAFFKKGNA-N, MAWRDGRSFXIWKV-VBZQPFBYNA-N, VTHDNMHRPKXWMZ-FIQXLTFTNA-N, AEJLXZDAEOYGPN-SAPUMUGNNA-N, AFFQVAIMWFYJJS-RZEXXKRKNA-N, AHOKLOMVXAXXTF-ULHGOQRHNA-N, AJCIAGRKJBJQST-YIFMJORUNA-N, AKWVODKXBRHXIL-NLHRPJCGNA-N, AKZOZLQVXBHJQL-ZPCYYFHENA-N, AOKCBLKXKQIBKY-SMTACHQSNA-N, APBNLRBTALYRHH-YEAYCDIONA-N, AREMZVRDXOGTHG-PCPMOZHJNA-N, ARSZXIDSEUCNLG-GKKPSEFHNA-N, ARWFFQAWGDUXPV-ZPAMSFT…	C61H114O6	2, 1	M+NH4, M+Na	960.8887, 965.8438	687.627	11.955	11.95	56.7204	10.2781	88.5496	100	0.290271	0.00885393	0.0994355	0.027847	0.847168	0.993093	0.359755	0.206162	0.765052	0.00114591	0.992174	0.841471	0.115127	0.0675087	0.348794
PC 36:1	PC	RP_Pos, RP_NegMSMS_980, 1056, 630		Y	nonGL	PC 18:0_18:1 M+H Atlas, PC 36:1 M+Na Atlas, PC 18:0_18:1 M+HCOO Atlas	Lipids and lipid-like molecules	Glycerophospholipids	Glycerophosphocholines	HMDB0008038	PC(18:0/18:1(9Z))	Glycerophospholipids [GP]	Glycerophosphocholines [GP01]	Diacylglycerophosphocholines [GP0101]	LMGP01010759 --- LMGP01010761	PC(18:0/18:1(9E)) --- PC(18:0/18:1(9Z))	PC 36:1	PC 18:0_18:1	ATHVAWFAEPLPPQ-LNVKXUELNA-N, ATHVAWFAEPLPPQ-LNVKXUELNA-N, JTHSDHJZUXRQAY-HNENSFHCNA-N	C44H86NO8P	1, 2	M+H, M+Na, M+HCOO	788.6119, 810.5944, 832.6072	309.275	7.1	7.09	98.6559	12.0358	100	100	0.291286	0.00904445	0.0999879	0.0869951	0.549252	0.9863	0.353487	0.217097	0.765052	0.0560141	0.633531	0.785372	0.126562	0.0454158	0.336408
TAG 58:6	TAG	RP_PosMSMS_1448		Y	GL	TG 18:0_18:1_22:5 M+NH4 Atlas --- TG 18:1_18:1_22:4 M+NH4 Atlas	Lipids and lipid-like molecules	Glycerolipids	Triradylcglycerols	HMDB0044962	TG(18:0/18:1(9Z)/22:5(7Z,10Z,13Z,16Z,19Z))	Glycerolipids [GL]	Triradylglycerols [GL03]	Triacylglycerols [GL0301]	LMGL03011227	TG(18:0/18:1(9Z)/22:5(7Z,10Z,13Z,16Z,19Z))[iso6]	TG 58:6	TG 18:0_18:1_22:5	JAESNECUPYJIJZ-BAPPQAHFNA-N, MLZUUSCOTWOREA-BMQZPGLHNA-N	C61H106O6	2	M+NH4	952.826	679.563	11.04	11.02	53.2258	16.3485	96.9466	100	0.289013	0.00947842	0.103174	0.0185339	0.898373	0.997945	0.170223	0.552689	0.765052	0.118543	0.311113	0.654154	0.103568	0.102072	0.369753
TAG 58:3	TAG	RP_PosMSMS_1459		Y	GL	TG 18:1_18:1_22:1 M+NH4 Atlas --- TG 18:1_18:2_22:0 M+NH4 Atlas	Lipids and lipid-like molecules	Glycerolipids	Triradylcglycerols	HMDB0010466, HMDB0046636	TG(18:1(9Z)/18:1(9Z)/22:1(13Z)) --- TG(22:0/18:2(9Z,12Z)/18:1(9Z))	Glycerolipids [GL]	Triradylglycerols [GL03]	Triacylglycerols [GL0301]	LMGL03010969 --- LMGL03010976	TG(18:1(9Z)/18:1(9Z)/22:1(13Z))[iso3] --- TG(18:1(9Z)/18:2(9Z,12Z)/22:0)[iso6]	TG 58:3	TG 18:1_18:1_22:1 --- TG 18:1_18:2_22:0	POBQACNRSDFLSN-LBXZNQFPNA-N, TUJAWJCRCOOMQU-KDNOBURDNA-N	C61H112O6	2	M+NH4	958.873	659.595	11.73	11.69	54.5699	23.2497	77.8626	100	0.282356	0.0100266	0.106276	-0.0810564	0.570012	0.988506	0.279328	0.32138	0.765052	-0.0346661	0.763956	0.80495	0.0876149	0.160629	0.40357
CE 22:5	CE	RP_PosMS1_761		Y	nonGL	CE 22:5 M+NH4 Atlas --- SE 28:1/21:5 M+NH4 Atlas --- SE 28:2/21:4 M+NH4 Atlas --- SE 29:1/20:5 M+NH4 Atlas --- SE 29:2/20:4 M+NH4 Atlas	Lipids and lipid-like molecules	Glycerophospholipids --- Steroids and steroid derivatives	Glycerophosphocholines --- Steroid esters	HMDB0010375, HMDB0062457	CE(22:5(7Z,10Z,13Z,16Z,19Z)) --- cholest-5-en-3beta-yl (7Z,10Z,13Z,16Z,19Z-docosapentaenoate)	Sterols [ST]	Sterols [ST01]	Cholesteryl esters [ST0102]	LMST01020031	22:5 Cholesterol ester	CE 22:5		BYCGWISXGHSDRH-UUSYZTLRNA-N, LGXPOZBUEUBJEU-RDOWKDNJNA-N, MBQZDKWZIKLRLZ-IQDWKTFINA-N, TUJYNDPFCNOQSG-METXMMQONA-N, XOLZNHXNFMEUGA-QXPWYRSVNA-N	C49H78O2	1	M+NH4	716.63		10.55	10.54	31.1828	29.4281	88.5496	100	0.288064	0.0100638	0.106276	0.328158	0.0225646	0.985013	0.375906	0.190259	0.765052	-0.0631323	0.591926	0.773359	0.173222	0.00585304	0.2331
PC 40:6	PC	RP_Pos, RP_NegMSMS_1132, 1202, 720		Y	nonGL	1-Octadecanoyl-2-(4Z,7Z,10Z,13Z,16Z,19Z-docosahexaenoyl)-sn-glycero-3-phosphocholine M+H NIST, PC 40:6 M+Na Atlas, PC 18:0_22:6 M+HCOO Atlas	Lipids and lipid-like molecules	Glycerophospholipids	Glycerophosphocholines	HMDB0008057	PC(18:0/22:6(4Z,7Z,10Z,13Z,16Z,19Z))	Glycerophospholipids [GP]	Glycerophosphocholines [GP01]	Diacylglycerophosphocholines [GP0101]	LMGP01010821	PC(18:0/22:6(4Z,7Z,10Z,13Z,16Z,19Z))	PC 40:6	PC 18:0_22:6	FAUYAENFVCNTAL-PFFNLMTBSA-N, BQABTNNQIPRRDE-QUAAIENRNA-N, SUSAZHLUBGMSDJ-RSLAUBRINA-N, FAUYAENFVCNTAL-UFTZFNJNNA-N	C48H84NO8P	1, 2	M+H, M+Na, M+HCOO	834.5959, 856.5781, 878.5914	673.514	6.37	6.35	98.6559	18.9627	100	100	0.275447	0.0104964	0.106952	0.143974	0.30301	0.985013	0.317855	0.24982	0.765052	-0.0834699	0.460756	0.709168	0.130786	0.0317017	0.305104
PG 34:1	PG	RP_Pos, RP_NegMS1_858, 411		Y	nonGL	1-Hexadecanoyl-2-(9Z-octadecenoyl)-sn-glycero-3-phospho-(1'-rac-glycerol) M+H NIST, 1-Hexadecanoyl-2-(9Z-octadecenoyl)-sn-glycero-3-phospho-(1'-rac-glycerol) M-H NIST --- PG 10:0_24:1 M-H Atlas --- PG 12:0_22:1 M-H Atlas --- PG 13:0_21:1 M-H Atlas --- PG 14:0_20:1 M-H Atlas --- PG 15:0_19:1 M-H Atlas --- PG 16:0_18:1 M-H Atlas --- PG 17:0_17:1 M-H Atlas --- PG 18:0_16:1 M-H Atlas --- PG 19:0_15:1…						Glycerophospholipids [GP]	Glycerophosphoglycerols [GP04]	Diacylglycerophosphoglycerols [GP0401]	LMGP04010002	PG(16:0/18:1(9Z))	PG 34:1	PG 16:0_18:1	PAZGBAOHGQRCBP-DDDNOICHSA-N, CCUPMFCZLQALLA-ZCXUNETKNA-N, CLQPGFZRDDZHJI-NTMALXAHNA-N, FOINIXAIPDUCNS-NXVVXOECNA-N, GPVIMJWVJZCTOV-MSUUIHNZNA-N, IPJKIWYVQGPZEW-PEZBUJJGNA-N, KZNSQHGWHKFCRU-MSUUIHNZNA-N, PAZGBAOHGQRCBP-DDDNOICHSA-N, PAZGBAOHGQRCBP-ZCXUNETKNA-N, QXBQVVBNODKSEP-BENRWUELNA-N, UJEANGZHUYFOQC-VLGSPTGONA-N, UKRMFVHZTJYMJC-NXVVXOECNA-N, YIQBSYSBVXVBAC-OWBHPGMINA-N, ZBLSNHAXWRMYIA-HNENSFH…	C40H77O10P	1	M+H, M-H	749.5283, 747.5168		6.055	6.045	94.086	20.99	100	100	0.289179	0.0105493	0.106952	0.0509542	0.729214	0.993093	0.238672	0.411538	0.765052	-0.0565387	0.634645	0.785372	0.113263	0.0777015	0.363249
Lutein --- Zeaxanthin	Xenobiotics	RP_PosMS1_468	RT_2		nonGL	Lutein M+H HMDB --- Lutein M+H NIST --- VAE 18:3 M+Na Atlas --- Zeaxanthin M+H HMDB	Lipids and lipid-like molecules	Prenol lipids	Tetraterpenoids	HMDB0002789, HMDB0003233	Zeaxanthin --- Lutein	Prenol Lipids [PR]	Isoprenoids [PR01]	C40 isoprenoids (tetraterpenes) [PR0107]	LMPR01070261 --- LMPR01070274	Lutein --- Zeaxanthin			JKQXZKUSFCKOGQ-QAYBQHTQSA-N, KBPHJBAIARWVSC-RGZFRNHPSA-N, WGYRYGOQDJJQIQ-NFUUMXNPSA-N	C40H56O2	1	M+H --- M+Na	569.429		7.72	7.67	98.9247	19.2565	97.7099	100	-0.289179	0.0106413	0.106952	-0.250284	0.0871882	0.985013	0.0205775	0.943716	0.77471	0.0681524	0.567119	0.76235	-0.138952	0.0299697	0.305104
TAG 50:2	TAG	RP_PosMSMS_1176		Y	GL	TG 16:0_16:1_18:1 M+NH4 Atlas	Lipids and lipid-like molecules	Glycerolipids	Triradylcglycerols	HMDB0005377	TG(16:0/16:1(9Z)/18:1(9Z))	Glycerolipids [GL]	Triradylglycerols [GL03]	Triacylglycerols [GL0301]	LMGL03010043	TG(16:0/16:1(9Z)/18:1(9Z))[iso6]	TG 50:2	TG 16:0_16:1_18:1	TWJCMQZMAPGUSG-BIDHIOHYNA-N	C53H98O6	2	M+NH4	848.764	577.515	10.81	10.76	98.3871	12.1079	100	100	0.28742	0.0107325	0.106952	0.0425366	0.771765	0.993093	0.271371	0.348367	0.765052	0.0433172	0.714823	0.799097	0.112695	0.0780625	0.363249
5'-Methylthioadenosine	5'-deoxyribonucleosides	HILIC_Neg, HILIC_PosMSMS_566, 954			nonGL	5'-Methylthioadenosine M-H HMDB, 5'-Methylthioadenosine M+H HMDB --- 5'-S-Methylthioadenosine; LC-ESI-QTOF; MS2; CE M+H MassBank --- Adenosine, 5'-S-methyl-5'-thio- M+H NIST	Nucleosides, nucleotides, and analogues	5'-deoxyribonucleosides	5'-deoxy-5'-thionucleosides	HMDB0001173	5'-Methylthioadenosine								WUUGFSXJNOTRMR-IOSLPCCCSA-N	C11H15N5O3S	1	M-H, M+H	296.0834, 298.0964		4.86	4.92	90.8108	6.9993	100	100	0.264485	0.0110235	0.108326	-0.0566704	0.675532	0.993093	0.341051	0.201027	0.765052	0.00182186	0.986727	0.841471	0.0897102	0.129562	0.388039
TAG 56:10	TAG	RP_PosMSMS_1374		Y	GL	TG 10:0_10:0_36:10 M+NH4 Atlas --- TG 10:0_14:1_32:9 M+NH4 Atlas --- TG 10:0_16:2_30:8 M+NH4 Atlas --- TG 10:0_16:3_30:7 M+NH4 Atlas --- TG 10:0_16:4_30:6 M+NH4 Atlas --- TG 10:0_18:3_28:7 M+NH4 Atlas --- TG 10:0_18:4_28:6 M+NH4 Atlas --- TG 10:0_18:5_28:5 M+NH4 Atlas --- TG 10:0_20:3_26:7 M+NH4 Atlas --- TG 10:0_20:4_26:6 M+NH4 Atlas --- TG 10:0_20:5_26:5 M+NH4 Atlas --- TG 10:0_22:4_24:6 M+NH4 …	Lipids and lipid-like molecules	Glycerolipids	Triradylcglycerols	HMDB0042839, HMDB0042868, HMDB0044527, HMDB0044581, HMDB0048319, HMDB0048939, HMDB0048960, HMDB0048981, HMDB0050197, HMDB0052752, HMDB0052766, HMDB0053583, HMDB0055311	TG(14:0/20:4(8Z,11Z,14Z,17Z)/22:6(4Z,7Z,10Z,13Z,16Z,19Z)) --- TG(14:0/20:5(5Z,8Z,11Z,14Z,17Z)/22:5(7Z,10Z,13Z,16Z,19Z)) --- TG(16:0/18:4(6Z,9Z,12Z,15Z)/22:6(4Z,7Z,10Z,13Z,16Z,19Z)) --- TG(16:0/20:5(5Z,8Z,11Z,14Z,17Z)/20:5(5Z,8Z,11Z,14Z,17Z)) --- TG(14:1(9Z)/20:4(8Z,11Z,14Z,17Z)/22:5(7Z,10Z,13Z,16Z,19Z)) --- TG(16:1(9Z)/18:3(9Z,12Z,15Z)/22:6(4Z,7Z,10Z,13Z,16Z,19Z)) --- TG(16:1(9Z)/18:4(6Z,9Z,12Z,1…	Glycerolipids [GL]	Triradylglycerols [GL03]	Triacylglycerols [GL0301]	LMGL03010947 --- LMGL03010954 --- LMGL03011078 --- LMGL03011152 --- LMGL03012689 --- LMGL03013091 --- LMGL03014542 --- LMGL03015771 --- LMGL03015861 --- LMGL03016249	TG(12:0/22:5(7Z,10Z,13Z,16Z,19Z)/22:5(7Z,10Z,13Z,16Z,19Z))[iso3] --- TG(14:0/20:5(5Z,8Z,11Z,14Z,17Z)/22:5(7Z,10Z,13Z,16Z,19Z))[iso6] --- TG(16:0/18:4(6Z,9Z,12Z,15Z)/22:6(4Z,7Z,10Z,13Z,16Z,19Z))[iso6] --- TG(16:0/20:5(5Z,8Z,11Z,14Z,17Z)/20:5(5Z,8Z,11Z,14Z,17Z))[iso3] --- TG(16:1(9Z)/18:3(9Z,12Z,15Z)/22:6(4Z,7Z,10Z,13Z,16Z,19Z))[iso6] --- TG(16:1(9Z)/18:4(6Z,9Z,12Z,15Z)/22:5(7Z,10Z,13Z,16Z,19Z))[is…	TG 56:10	TG 12:0_22:5_22:5 --- TG 14:0_20:5_22:5 --- TG 16:0_18:4_22:6 --- TG 16:0_20:5_20:5 --- TG 16:1_18:3_22:6 --- TG 16:1_18:4_22:5 --- TG 17:2_17:2_22:6 --- TG 18:1_18:4_20:5 --- TG 18:2_18:3_20:5 --- TG 18:4_18:4_20:2	ADRALAVAFVAMGA-JABHOJASNA-N, AEHZIODYQQDSRW-FHJDJZCCNA-N, AFZLHWXXQGOSDV-INCHHLNANA-N, ALAWXLXGARMYDF-HSPTWKJCNA-N, AMUXNMKBRIFWFR-ONQZMEFNNA-N, AQXRMVFVVRVQAE-MAFDTHKMNA-N, ARKYSOZVAUAZIN-GLERNRKFNA-N, AWFXNIMGSZHSIE-SSRCRKRKNA-N, AYBXRMPBKMKWBN-UXTHEGSMNA-N, AZDJPYVEMIULTK-UDNGJFRFNA-N, BIWZZNDRPMVBQT-HFOTZGRVNA-N, BPFIDDJGPMARKE-UYLYTVNQNA-N, BWSGVXGTFNCUBB-XKROMUHNNA-N, CACIQLGJXMKEDD-FRQHLLB…	C59H94O6	1	M+NH4	916.739		10.48	10.63	71.7742	21.3522	93.8931	100	0.274355	0.0114397	0.110876	0.0593726	0.674001	0.993093	0.303163	0.276129	0.765052	-0.00682255	0.952347	0.835284	0.113377	0.0653682	0.340314
DAG 35:5	DAG	RP_PosMS1_529		Y	GL	Cer 18:3;3O/20:2;(2OH) M+H Atlas --- Cer 20:3;3O/18:2;(2OH) M+H Atlas --- Cer 22:3;3O/16:2;(2OH) M+H Atlas --- DG 11:0_24:5 M+NH4 Atlas --- DG 13:0_22:5 M+NH4 Atlas --- DG 13:1_22:4 M+NH4 Atlas --- DG 15:0_20:5 M+NH4 Atlas --- DG 15:1_20:4 M+NH4 Atlas --- DG 17:0_18:5 M+NH4 Atlas --- DG 17:1_18:4 M+NH4 Atlas --- DG 17:2_18:3 M+NH4 Atlas --- DG 19:1_16:4 M+NH4 Atlas --- DG 19:2_16:3 M+NH4 Atlas --…	Lipids and lipid-like molecules	Glycerolipids	Diradylglycerols	HMDB0007085	DG(15:0/20:5(5Z,8Z,11Z,14Z,17Z)/0:0)	Glycerolipids [GL]	Diradylglycerols [GL02]	Diacylglycerols [GL0201]	LMGL02010051 --- LMGL02010376 --- LMGL02010441	DG(13:0/22:5(7Z,10Z,13Z,16Z,19Z)/0:0)[iso2] --- DG(15:0/20:5(5Z,8Z,11Z,14Z,17Z)/0:0)[iso2] --- DG(17:2(9Z,12Z)/18:3(9Z,12Z,15Z)/0:0)[iso2]	DG 35:5	DG 13:0_22:5 --- DG 15:0_20:5 --- DG 17:2_18:3	AHFVGFDGXIBSAV-GSCXELOCNA-N, ASRLPQUWVHRWNQ-YVAAATNKNA-N, ATQOFARVZHKFEK-UJAGUTTENA-N, BPNCTANBXQESQI-IHDWIWDKNA-N, BQOIYYTYJIEWIF-TYBQXOFFNA-N, CBFSMKQPBJTXBN-GCPCFZCHNA-N, CBRHWBXPNJLUQO-UGTYNFHINA-N, CMXBBYUEFAZMLC-IEZVAYKSNA-N, DWRYUXKSLMHNCO-DBRBFSQJNA-N, FEXILKCHBLKTBA-BCXDOREHNA-N, FWEOUPBVCNEQNG-BBDKIWCZNA-N, GVFMHKNJAGKXGA-XZOQGNSINA-N, HTRAGSOEBRCVDV-JEOQIOCENA-N, JLAJSSUZJWRTIN-PZSNRTD…	C38H64O5	1	M+H --- M+NH4	618.511		7.7	7.64	100	9.3589	100	100	0.275759	0.0117832	0.112662	0.0876466	0.538108	0.985013	0.27715	0.324102	0.765052	0.11858	0.302072	0.653825	0.117997	0.0572358	0.336408
TAG 49:1	TAG	RP_PosMSMS_1145, 1159		Y	GL	TG 15:0_16:0_18:1 M+NH4 Atlas, TG 15:0_15:0_19:1 M+Na Atlas --- TG 15:0_16:0_18:1 M+Na Atlas	Lipids and lipid-like molecules	Glycerolipids	Triradylcglycerols	HMDB0043027	TG(15:0/16:0/18:1(9Z))	Glycerolipids [GL]	Triradylglycerols [GL03]	Triacylglycerols [GL0301]	LMGL03015010, LMGL03012884 --- LMGL03015010	TG(15:0/16:0/18:1(9Z))[iso6], TG(15:0/15:0/19:1(9Z))[iso3] --- TG(15:0/16:0/18:1(9Z))[iso6]	TG 49:1	TG 15:0_16:0_18:1, TG 15:0_15:0_19:1 --- TG 15:0_16:0_18:1	IVRUJYRTYXTTIH-QPLCGJKRNA-N, CGNSBMCYBIAJRM-RQZHXJHFNA-N, IVRUJYRTYXTTIH-QPLCGJKRNA-N	C52H98O6	2, 1	M+NH4, M+Na	836.764, 841.7204	537.48	10.925	10.89	93.0108	7.91715	98.4733	100	0.277978	0.0122266	0.115254	0.0378012	0.793405	0.993093	0.335298	0.238507	0.765052	0.0654288	0.574803	0.766286	0.111946	0.0753032	0.363249
CE 24:1	CE	RP_PosMS1_867		Y	nonGL	CE 24:1 M+NH4 Atlas --- SE 28:1/23:1 M+NH4 Atlas --- SE 28:2/23:0 M+NH4 Atlas --- SE 29:1/22:1 M+NH4 Atlas --- SE 29:2/22:0 M+NH4 Atlas						Sterols [ST]	Sterols [ST01]	Cholesteryl esters [ST0102]	LMST01020051 --- LMST01020083	22:0 Stigmasterol ester --- 22:1 Sitosterol ester			DEJZYHBHAOYAFB-UHFFFAOYNA-N, JWVQJSBHHUTPSN-UHFFFAOYNA-N, LEKBVMDOADSUQQ-HNENSFHCNA-N, NHTXXNHMZGOTGQ-MSUUIHNZNA-N, VBOXELVAJXPXMS-WUKNDPDINA-N	C51H90O2	1	M+NH4	752.727		12.3	12.21	32.2581	29.5246	39.6947	100	0.281793	0.0123801	0.115254	0.396599	0.00582851	0.934504	0.303762	0.293326	0.765052	0.173305	0.141533	0.542199	0.180888	0.00415623	0.218042
N-Acetyltryptophan	Amino acids, peptides, and analogues	HILIC_NegMS1_418	RT_2		nonGL	N-Acetyl-D-tryptophan M-H HMDB --- N-Acetyltryptophan M-H FiehnHILIC --- N-Acetyltryptophan M-H HMDB	Organic acids and derivatives	Carboxylic acids and derivatives	Amino acids, peptides, and analogues	HMDB0013713, HMDB0255052	N-Acetyltryptophan --- N-Acetyl-D-tryptophan								DZTHIGRZJZPRDV-LBPRGKRZSA-N, DZTHIGRZJZPRDV-UHFFFAOYNA-N, DZTHIGRZJZPRDV-UHFFFAOYSA-N	C13H14N2O3	1	M-H	245.093		6.61	6.65	45.2575	24.3938	91.7293	100	-0.265102	0.0138502	0.127266	-0.244804	0.0782061	0.985013	-0.306266	0.267381	0.765052	0.0124342	0.912579	0.832797	-0.146408	0.0158139	0.250915
DAG 35:6	DAG	RP_PosMS1_527		Y	GL	DG 11:0_24:6 M+NH4 Atlas --- DG 13:0_22:6 M+NH4 Atlas --- DG 13:1_22:5 M+NH4 Atlas --- DG 15:1_20:5 M+NH4 Atlas --- DG 17:1_18:5 M+NH4 Atlas --- DG 17:2_18:4 M+NH4 Atlas --- DG 19:2_16:4 M+NH4 Atlas --- DG 9:0_26:6 M+NH4 Atlas --- NAGly 10:0/26:4 M+H Atlas --- NAGly 12:0/24:4 M+H Atlas --- NAGly 14:0/22:4 M+H Atlas --- NAGly 14:1/22:3 M+H Atlas --- NAGly 16:0/20:4 M+H Atlas --- NAGly 16:1/20:3 M+…						Glycerolipids [GL]	Diradylglycerols [GL02]	Diacylglycerols [GL0201]	LMGL02010377 --- LMGL02010465	DG(13:0/22:6(4Z,7Z,10Z,13Z,16Z,19Z)/0:0)[iso2] --- DG(15:1(9Z)/20:5(5Z,8Z,11Z,14Z,17Z)/0:0)[iso2]	DG 35:6	DG 13:0_22:6 --- DG 15:1_20:5	AAMWMMOVOHLPBF-SJCQXOIGNA-N, AHOCUILEFCCWOW-IWPNLYLCNA-N, AJFRWXQDXWVCDV-SJCQXOIGNA-N, ALGIUWNPWVCBND-KUXGPOOQNA-N, ATEHLXWMQBGQJJ-RUGMXPLONA-N, BSMMVYMCDYISRL-XWVIRPHINA-N, BXBAFPCUWPZADF-SJCQXOIGNA-N, CHGWNNHMLPHDSW-SJCQXOIGNA-N, CHNNUGCMJIJKFU-BENRWUELNA-N, CNCIBIDVDQXZJT-RLESYFSLNA-N, DEYDSZRNBDXKMI-SJCQXOIGNA-N, DSBRGELVIIKHLH-ZDMOZKBQNA-N, FKHXHRLBMNWEKS-ACOVZCEQNA-N, FNTUAQXJXCRTAY-HKZRWAB…	C38H62O5	1	M+H --- M+NH4	616.496		7.2	7.16	77.4194	9.84842	100	100	0.277006	0.014039	0.127347	0.0632859	0.665938	0.993093	0.213504	0.460959	0.765052	0.0593564	0.616447	0.783342	0.110544	0.0839666	0.363249
TAG 51:2	TAG	RP_PosMSMS_1226, 1244		Y	GL	TG 16:0_17:1_18:1 M+NH4 Atlas, TG 16:0_17:1_18:1 M+Na Atlas						Glycerolipids [GL]	Triradylglycerols [GL03]	Triacylglycerols [GL0301]	LMGL03010061	TG(16:0/17:1(9Z)/18:1(9Z))[iso6]	TG 51:2	TG 16:0_17:1_18:1	QLIUVBJPQMDRHV-IFNXDHGUNA-N	C54H100O6	2, 1	M+NH4, M+Na	862.7797, 867.735	265.247	10.99	10.92	95.1613	9.86908	100	100	0.271699	0.014422	0.129165	0.0718486	0.618567	0.993093	0.19696	0.489782	0.765052	0.00889697	0.939255	0.833368	0.109698	0.0815215	0.363249
TAG 59:3	TAG	RP_PosMS1_1496		Y	GL	TG 10:0_13:0_36:3 M+Na Atlas --- TG 10:0_13:1_36:2 M+Na Atlas --- TG 10:0_15:0_34:3 M+Na Atlas --- TG 10:0_15:1_34:2 M+Na Atlas --- TG 10:0_16:3_33:0 M+Na Atlas --- TG 10:0_17:0_32:3 M+Na Atlas --- TG 10:0_17:1_32:2 M+Na Atlas --- TG 10:0_17:2_32:1 M+Na Atlas --- TG 10:0_18:3_31:0 M+Na Atlas --- TG 10:0_19:0_30:3 M+Na Atlas --- TG 10:0_19:1_30:2 M+Na Atlas --- TG 10:0_19:2_30:1 M+Na Atlas --- TG …	Lipids and lipid-like molecules	Glycerolipids	Triradylcglycerols	HMDB0043356	TG(15:0/22:1(13Z)/22:2(13Z,16Z))	Glycerolipids [GL]	Triradylglycerols [GL03]	Triacylglycerols [GL0301]	LMGL03011052 --- LMGL03011081 --- LMGL03011112 --- LMGL03011113 --- LMGL03011119 --- LMGL03011120 --- LMGL03011121 --- LMGL03011205 --- LMGL03011210 --- LMGL03011211 --- LMGL03011254 --- LMGL03011255 --- LMGL03011256 --- LMGL03011266 --- LMGL03011274 --- LMGL03011351 --- LMGL03011366 --- LMGL03011512 --- LMGL03013138 --- LMGL03015337 --- LMGL03015687 --- LMGL03016198 --- LMGL03016334 --- LMGL0301…	TG(15:0/22:0/22:3(10Z,13Z,16Z))[iso6] --- TG(15:1(9Z)/22:0/22:2(13Z,16Z))[iso6] --- TG(16:0/21:0/22:3(10Z,13Z,16Z))[iso6] --- TG(16:1(9Z)/21:0/22:2(13Z,16Z))[iso6] --- TG(17:0/20:0/22:3(10Z,13Z,16Z))[iso6] --- TG(17:0/20:1(11Z)/22:2(13Z,16Z))[iso6] --- TG(17:0/20:2(11Z,14Z)/22:1(13Z))[iso6] --- TG(17:1(9Z)/20:0/22:2(13Z,16Z))[iso6] --- TG(17:1(9Z)/20:1(11Z)/22:1(13Z))[iso6] --- TG(17:1(9Z)/20:2(1…	TG 59:3	TG 15:0_22:0_22:3 --- TG 15:1_22:0_22:2 --- TG 16:0_21:0_22:3 --- TG 16:1_21:0_22:2 --- TG 17:0_20:0_22:3 --- TG 17:0_20:1_22:2 --- TG 17:0_20:2_22:1 --- TG 17:1_20:0_22:2 --- TG 17:1_20:1_22:1 --- TG 17:1_20:2_22:0 --- TG 17:2_20:0_22:1 --- TG 17:2_20:1_22:0 --- TG 18:0_19:0_22:3 --- TG 18:0_19:1_22:2 --- TG 18:1_19:0_22:2 --- TG 18:1_20:2_21:0 --- TG 18:2_19:0_22:1 --- TG 18:2_19:1_22:0 --- TG …	AIBCADAVAQGLQU-QXORKPRHNA-N, AJUVLVCEMPODRA-IKXCIFBPNA-N, ANFLXYQMQDQBRY-FJIRYKCTNA-N, ANVAKBDFPMBCSQ-AAAXEXNWNA-N, AOTHVZQTIVNCEU-ONGBHLIUNA-N, ATDOZXNBHSHFFT-LWIXAHBUNA-N, AVQJTAJHIBFEGF-NFCRBEBANA-N, BFUVDOIFQAYDOE-XXTYUAAQNA-N, BGVXPOXCABKOJS-OVDOLTILNA-N, BHZMKAQZWXZWHH-GEVDZPJCNA-N, BJMKOPVJMQPYSO-BQWKMGCYNA-N, BLQCAPPAOVFKTQ-ABJOXCPJNA-N, BMCUUEIBHRJUCV-XCWSFUEJNA-N, BPBVLPZEEYDCLL-VPTSHLA…	C62H114O6	1	M+Na	977.843		11.82	11.82	45.6989	26.9522	75.5725	100	0.267564	0.0150332	0.132956	0.117329	0.411316	0.985013	0.297147	0.292136	0.765052	0.00620769	0.957197	0.835284	0.12212	0.0498318	0.336408
Ala-Glu	Amino acids, peptides, and analogues	HILIC_PosMS1_560			nonGL	Ala-Glu M+H NIST	Organic acids and derivatives	Carboxylic acids and derivatives	Amino acids, peptides, and analogues	HMDB0028686	Alanylglutamic acid								VYZAGTDAHUIRQA-UHFFFAOYSA-N	C8H14N2O5	1	M+H	219.099		5.94	5.95	22.7027	16.3541	63.1579	100	-0.274759	0.0153297	0.133774	-0.296152	0.0422332	0.985013	-0.13801	0.635458	0.765052	0.114408	0.335662	0.665816	-0.151074	0.017955	0.250915
PA 46:6	PA	HILIC_NegMS1_1407		Y	nonGL	NAGlySer 20:5/26:4 M-H Atlas --- NAGlySer 22:5/24:4 M-H Atlas --- NAGlySer 24:4/22:5 M-H Atlas --- NAGlySer 24:5/22:4 M-H Atlas --- NAGlySer 24:6/22:3 M-H Atlas --- NAGlySer 26:5/20:4 M-H Atlas --- NAGlySer 26:6/20:3 M-H Atlas --- NAGlySer 26:7/20:2 M-H Atlas --- PA 20:2_26:4 M-H Atlas --- PA 22:2_24:4 M-H Atlas --- PA 24:0_22:6 M-H Atlas --- PA 24:1_22:5 M-H Atlas --- PA 24:2_22:4 M-H Atlas --- …	Lipids and lipid-like molecules	Glycerophospholipids	Glycerophosphates	HMDB0115452	PA(24:0/22:6(4Z,7Z,10Z,13Z,16Z,19Z))								CWFJTAWGFMENLC-YHCYZVCPNA-N, FZMZTVPEWKDTDS-GGROPNIXNA-N, FZUNGYBWXPPXGT-FFUZSSOENA-N, GFOVQMYEPDMOKR-VLZNVXKRNA-N, GVJCUBFLBWRDKJ-XAICOYOTNA-N, HABJTLBDJSNTPT-UXQUIXHLNA-N, IWXTZJMPZIVBGP-BBSIOPQKNA-N, LJTRGUUOQIWZHZ-MTSLFELONA-N, LOANMMJYZWJRFB-DYTQRSFTNA-N, LVOKYOXLSUPSEW-ZTZOLFKENA-N, MPOFOPYWFAPWFL-JWHAHSGVNA-N, NBHKESIZVCOWTC-NRLAIBLFNA-N, NFQBPDCXMRQJNU-AUHKTZKMNA-N, NXQWUWJCUXLOCL-MHRDRQL…	C49H85O8P	1	M-H	831.591		6.56	6.56	49.8645	12.8066	100	100	0.270835	0.0155039	0.133774	0.0817899	0.573593	0.988882	0.0697866	0.808248	0.768914	-0.114829	0.327691	0.661296	0.105063	0.0979193	0.366928
PE O-38:7	PE-O	RP_Pos, RP_NegMSMS_853, 407		Y	nonGL	PE O-16:1_22:6 M+H Atlas, PE O-16:1_22:6 M-H Atlas													KGCPGAKRLOCUEV-ZLXBYIIJNA-N	C43H74NO7P	1, 2	M+H, M-H	748.5255, 746.5136	327.225	6.05	6.045	90.5914	26.1004	98.4733	100	0.271479	0.0160538	0.135514	0.00406635	0.977863	0.998614	0.18114	0.531477	0.765052	0.0127298	0.914439	0.832797	0.0957572	0.134835	0.388039
SM 42:4;O2	SM	RP_Neg, RP_PosMSMS_672, 1123		Y	nonGL	SM 29:3;2O/13:1 M+HCOO Atlas, SM 42:4;2O M+Na Atlas													VOSKNFLJEUHVOY-OUYZLNCLNA-N, VTFZCSWMNQEKJY-JAWPMMNVNA-N	C47H89N2O6P	1, 2	M+HCOO, M+Na	853.6441, 831.6318	648.567	6.525	6.495	34.6774	13.0418	98.4733	100	-0.261734	0.0160886	0.135514	-0.216215	0.123802	0.985013	-0.292225	0.294356	0.765052	-0.236771	0.0361729	0.419009	-0.139126	0.0232577	0.272606
TAG 55:6	TAG	RP_PosMS1_1372		Y	GL	TG 10:0_11:0_34:6 M+Na Atlas --- TG 10:0_13:0_32:6 M+Na Atlas --- TG 10:0_13:1_32:5 M+Na Atlas --- TG 10:0_15:0_30:6 M+Na Atlas --- TG 10:0_15:1_30:5 M+Na Atlas --- TG 10:0_17:0_28:6 M+Na Atlas --- TG 10:0_17:1_28:5 M+Na Atlas --- TG 10:0_17:2_28:4 M+Na Atlas --- TG 10:0_19:0_26:6 M+Na Atlas --- TG 10:0_19:1_26:5 M+Na Atlas --- TG 10:0_19:2_26:4 M+Na Atlas --- TG 10:0_21:0_24:6 M+Na Atlas --- TG …	Lipids and lipid-like molecules	Glycerolipids	Triradylcglycerols	HMDB0043074, HMDB0043276, HMDB0043304, HMDB0043477, HMDB0043675	TG(15:0/18:0/22:6(4Z,7Z,10Z,13Z,16Z,19Z)) --- TG(15:0/18:1(9Z)/22:5(7Z,10Z,13Z,16Z,19Z)) --- TG(15:0/20:1(11Z)/20:5(5Z,8Z,11Z,14Z,17Z)) --- TG(15:0/20:2n6/20:4(8Z,11Z,14Z,17Z)) --- TG(15:0/18:4(6Z,9Z,12Z,15Z)/22:2(13Z,16Z))	Glycerolipids [GL]	Triradylglycerols [GL03]	Triacylglycerols [GL0301]	LMGL03010482 --- LMGL03010488 --- LMGL03010489 --- LMGL03010504 --- LMGL03010505 --- LMGL03010577 --- LMGL03010588 --- LMGL03010617 --- LMGL03010646 --- LMGL03010647 --- LMGL03010648 --- LMGL03013650 --- LMGL03014058 --- LMGL03014069 --- LMGL03014466 --- LMGL03014479 --- LMGL03014871 --- LMGL03014942 --- LMGL03015145 --- LMGL03015164 --- LMGL03015216 --- LMGL03015231 --- LMGL03015281 --- LMGL0301…	TG(12:0/21:0/22:6(4Z,7Z,10Z,13Z,16Z,19Z))[iso6] --- TG(13:0/20:0/22:6(4Z,7Z,10Z,13Z,16Z,19Z))[iso6] --- TG(13:0/20:1(11Z)/22:5(7Z,10Z,13Z,16Z,19Z))[iso6] --- TG(14:0/19:0/22:6(4Z,7Z,10Z,13Z,16Z,19Z))[iso6] --- TG(14:0/19:1(9Z)/22:5(7Z,10Z,13Z,16Z,19Z))[iso6] --- TG(14:1(9Z)/19:0/22:5(7Z,10Z,13Z,16Z,19Z))[iso6] --- TG(14:1(9Z)/20:5(5Z,8Z,11Z,14Z,17Z)/21:0)[iso6] --- TG(15:0/18:0/22:6(4Z,7Z,10Z,13Z…	TG 55:6	TG 12:0_21:0_22:6 --- TG 13:0_20:0_22:6 --- TG 13:0_20:1_22:5 --- TG 14:0_19:0_22:6 --- TG 14:0_19:1_22:5 --- TG 14:1_19:0_22:5 --- TG 14:1_20:5_21:0 --- TG 15:0_18:0_22:6 --- TG 15:0_18:1_22:5 --- TG 15:0_18:3_22:3 --- TG 15:0_18:4_22:2 --- TG 15:0_20:1_20:5 --- TG 15:1_18:0_22:5 --- TG 15:1_18:2_22:3 --- TG 15:1_18:3_22:2 --- TG 15:1_20:0_20:5 --- TG 16:0_17:0_22:6 --- TG 16:0_17:1_22:5 --- TG …	ABVFGTCLJUKRIA-ABBHDXQHNA-N, ADSGBFZVHUICFT-LAAQUQGFNA-N, AEIUBYXPUKPTST-SRHLIFMDNA-N, AFOLAZWOEZYEBM-WORGPQJDNA-N, AFZMMZHPURNETO-ILQMLUOONA-N, AIHQNDDTAHSVDF-DXLDMHPINA-N, ALSVWLITJYRXIR-QMQNYPBMNA-N, ANKLIVASCTZPIV-MFCSRANONA-N, AOPDUXKFFUJBBX-SMHOWZPCNA-N, AQHMONKBUMHDLN-KHJOMZKVNA-N, ASDMDHHDQSFVOW-QWVNLIPINA-N, AVHLUYSQTCFVEQ-RQNKUGRMNA-N, AXZZYCNJUIBPOJ-JSYRWOKNNA-N, AYBHYHWZXOVRGB-MICCPEP…	C58H100O6	1	M+Na	915.736		10.65	10.66	62.9032	17.2457	96.1832	100	0.248975	0.0169083	0.140327	0.140482	0.298293	0.985013	0.370308	0.164671	0.765052	0.0573941	0.599931	0.779737	0.124315	0.0346684	0.307591
TAG 59:7	TAG	RP_PosMS1_1469		Y	GL	TG 10:0_11:0_38:7 M+NH4 Atlas --- TG 10:0_13:0_36:7 M+NH4 Atlas --- TG 10:0_13:1_36:6 M+NH4 Atlas --- TG 10:0_15:0_34:7 M+NH4 Atlas --- TG 10:0_15:1_34:6 M+NH4 Atlas --- TG 10:0_17:0_32:7 M+NH4 Atlas --- TG 10:0_17:1_32:6 M+NH4 Atlas --- TG 10:0_17:2_32:5 M+NH4 Atlas --- TG 10:0_19:0_30:7 M+NH4 Atlas --- TG 10:0_19:1_30:6 M+NH4 Atlas --- TG 10:0_19:2_30:5 M+NH4 Atlas --- TG 10:0_21:0_28:7 M+NH4 A…	Lipids and lipid-like molecules	Glycerolipids	Triradylcglycerols	HMDB0043364, HMDB0043566	TG(15:0/22:1(13Z)/22:6(4Z,7Z,10Z,13Z,16Z,19Z)) --- TG(15:0/22:2(13Z,16Z)/22:5(7Z,10Z,13Z,16Z,19Z))	Glycerolipids [GL]	Triradylglycerols [GL03]	Triacylglycerols [GL0301]	LMGL03011355 --- LMGL03011400 --- LMGL03011411 --- LMGL03011420 --- LMGL03011455 --- LMGL03011456 --- LMGL03011457 --- LMGL03011463 --- LMGL03011464 --- LMGL03011513 --- LMGL03011554 --- LMGL03011611 --- LMGL03011619 --- LMGL03011761 --- LMGL03012977 --- LMGL03015348 --- LMGL03015691 --- LMGL03016202 --- LMGL03016272 --- LMGL03016536 --- LMGL03016565 --- LMGL03016578 --- LMGL03016718	TG(15:0/22:2(13Z,16Z)/22:5(7Z,10Z,13Z,16Z,19Z))[iso6] --- TG(15:1(9Z)/22:0/22:6(4Z,7Z,10Z,13Z,16Z,19Z))[iso6] --- TG(15:1(9Z)/22:3(10Z,13Z,16Z)/22:3(10Z,13Z,16Z))[iso3] --- TG(16:1(9Z)/21:0/22:6(4Z,7Z,10Z,13Z,16Z,19Z))[iso6] --- TG(17:0/20:1(11Z)/22:6(4Z,7Z,10Z,13Z,16Z,19Z))[iso6] --- TG(17:0/20:2(11Z,14Z)/22:5(7Z,10Z,13Z,16Z,19Z))[iso6] --- TG(17:0/20:5(5Z,8Z,11Z,14Z,17Z)/22:2(13Z,16Z))[iso6] --…	TG 59:7	TG 15:0_22:2_22:5 --- TG 15:1_22:0_22:6 --- TG 15:1_22:3_22:3 --- TG 16:1_21:0_22:6 --- TG 17:0_20:1_22:6 --- TG 17:0_20:2_22:5 --- TG 17:0_20:5_22:2 --- TG 17:1_20:0_22:6 --- TG 17:1_20:1_22:5 --- TG 17:1_20:5_22:1 --- TG 17:2_20:0_22:5 --- TG 17:2_20:2_22:3 --- TG 17:2_20:5_22:0 --- TG 18:0_19:1_22:6 --- TG 18:1_19:0_22:6 --- TG 18:1_19:1_22:5 --- TG 18:2_19:0_22:5 --- TG 18:2_20:5_21:0 --- TG …	ABRBHTPVUSWBRU-AKKHNEAFNA-N, AFVPRALRRYUBBI-RFAWCQTKNA-N, AIKFYOWYBXQFTD-NMZCYYRMNA-N, AKIUWLNGLZXHPK-KONLYDHWNA-N, AOSJSCQVNUGRQN-VGCZWBOBNA-N, APZPPOHKYQPWOP-JIMOSURXNA-N, AQMNSNINQADNRT-XVPJWRSJNA-N, AQONSHBRRCNIST-HCLXAIBNNA-N, ATJHCMMEKZFOFJ-SIENXPGJNA-N, AZLLTOOTWCVASB-VMHZEALVNA-N, BBCYUJFEONDZJE-BRWSMADYNA-N, BBDLQHBKTKMBIX-FXLPEYFKNA-N, BFRFQMJACOBADV-LWPYWVJKNA-N, BGCFSZZWBSXGSU-YEOYFUC…	C62H106O6	1	M+NH4	964.832		11.79	11.73	67.7419	10.4713	100	100	0.265522	0.0170567	0.140327	0.00204236	0.988733	0.998614	0.455862	0.108615	0.765052	-0.0361419	0.757202	0.80495	0.107048	0.0897837	0.363954
MAG 20:0	MAG	HILIC_PosMSMS_1294		Y	GL	Monoarachidin M+H-H2O NIST						Glycerolipids [GL]	Monoradylglycerols [GL01]	Monoacylglycerols [GL0101]	LMGL01010007	MG(20:0/0:0/0:0)[rac]	MG 20:0	MG 20:0	UMEKPPOFCOUEDT-UHFFFAOYSA-N	C23H46O4	1	M+H-H2O	369.335		1.22	1.21	97.027	13.9491	100	100	-0.264317	0.0175441	0.141518	-0.205075	0.153957	0.985013	-0.214111	0.453239	0.765052	0.155169	0.182419	0.589712	-0.133935	0.0329922	0.305104
L-Aspartic acid	Amino acids, peptides, and analogues	HILIC_NegMSMS_70			nonGL	Aspartate; LC-ESI-ITFT; MS2; CE 90.0 eV; [M-H]- M-H MassBank --- D-Aspartic acid M-H HMDB --- L-Aspartic acid M-H HMDB	Organic acids and derivatives	Carboxylic acids and derivatives	Amino acids, peptides, and analogues	HMDB0000191, HMDB0006483	L-Aspartic acid --- D-Aspartic acid								CKLJMWTZIZZHCS-REOHCLBHSA-N, CKLJMWTZIZZHCS-UHFFFAOYNA-N, CKLJMWTZIZZHCS-UWTATZPHSA-N	C4H7NO4	1	M-H	132.03		15.31	15.36	14.0921	27.89	33.0827	100	0.265423	0.0176015	0.141518	0.0963169	0.506804	0.985013	0.21897	0.44516	0.765052	0.0406654	0.729072	0.799097	0.113522	0.0730019	0.363035
LPI 16:1	LPI	HILIC_NegMSMS_1178		Y	nonGL	LPI 16:1 M-H Atlas						Glycerophospholipids [GP]	Glycerophosphoinositols [GP06]	Monoacylglycerophosphoinositols [GP0605]	LMGP06050009	PI(16:1(9Z)/0:0)	LPI 16:1	LPI 16:1	VPFGUPHJCAHVJV-FPLPWBNLNA-N	C25H47O12P	1	M-H	569.273		10.85	10.94	62.3306	16.6861	100	100	0.26822	0.0179305	0.142543	0.256915	0.0785843	0.985013	0.125035	0.667349	0.765052	0.280899	0.0166517	0.330301	0.140784	0.0275953	0.293089
PC 38:2	PC	RP_PosMSMS_1073, 1141		Y	nonGL	PC 18:0_20:2 M+H Atlas --- PC 19:1_19:1 M+H Atlas, PC 38:2 M+Na Atlas	Lipids and lipid-like molecules	Glycerophospholipids	Glycerophosphocholines	HMDB0008045	PC(18:0/20:2(11Z,14Z))	Glycerophospholipids [GP]	Glycerophosphocholines [GP01]	Diacylglycerophosphocholines [GP0101]	LMGP01010788 --- LMGP01011774, LMGP01011774	PC(18:0/20:2(11Z,14Z)) --- PC(19:1(9Z)/19:1(9Z)), PC(19:1(9Z)/19:1(9Z))	PC 38:2	PC 18:0_20:2 --- PC 19:1/19:1, PC 19:1/19:1	HJYITXYOCDILBF-HKOLQMFGNA-N, ZQLPLCXRBVPKGP-DYMXKLMANA-N, HJYITXYOCDILBF-HKOLQMFGNA-N	C46H88NO8P	1	M+H, M+Na	814.6281, 836.6105		7.235	7.22	48.1183	11.3206	96.1832	100	0.262118	0.0190191	0.148131	0.114694	0.428717	0.985013	0.157303	0.583366	0.765052	0.02609	0.824057	0.816992	0.112978	0.0742079	0.363249
Bergapten	Xenobiotics	HILIC_NegMSMS_323			nonGL	Bergapten M-H HMDB	Phenylpropanoids and polyketides	Coumarins and derivatives	Furanocoumarins	HMDB0030637	Bergapten								BGEBZHIAGXMEMV-UHFFFAOYSA-N	C12H8O4	1	M-H	215.032		10.62	10.59	93.7669	17.223	84.2105	100	-0.26699	0.0191105	0.148131	-0.223038	0.129492	0.985013	-0.643586	0.0259292	0.765052	0.205226	0.0839237	0.494621	-0.159465	0.0127458	0.250915
PE O-36:5	PE-O	RP_Pos, RP_NegMSMS_784, 357		Y	nonGL	PE O-16:1_20:4 M+H Atlas, PE O-16:1_20:4 M-H Atlas													YATSYZSZUULQDZ-GKPKDRHFNA-N	C41H74NO7P	2	M+H, M-H	724.5236, 722.5139	364.2579, 303.2314	6.195	6.16	82.5269	28.8191	100	100	0.257075	0.0192615	0.148131	0.0467325	0.743132	0.993093	0.203229	0.470606	0.765052	0.0505165	0.661223	0.785957	0.100524	0.106493	0.372645
Pyruvic acid	Other organic acids and derivatives	HILIC_NegMS1_4			nonGL	Pyruvic acid M-H FiehnHILIC	Organic acids and derivatives	Keto acids and derivatives	Alpha-keto acids and derivatives	HMDB0000243	Pyruvic acid	Fatty Acyls [FA]	Fatty Acids and Conjugates [FA01]	Oxo fatty acids [FA0106]	LMFA01060077	Pyruvic acid	FA 3:1;O		LCTONWCANYUPML-UHFFFAOYSA-N	C3H4O3	1	M-H	87.0088		6.12	6.16	60.9756	13.7307	97.7444	100	-0.254847	0.0199795	0.14946	-0.0965458	0.496722	0.985013	-0.629607	0.0233304	0.765052	0.0255837	0.823908	0.816992	-0.130499	0.0347281	0.307591
D-Glucaro-1,4-lactone	Organoheterocyclic compounds	HILIC_NegMS1_820			nonGL	D-Saccharic acid 1,4-lactone 2M-H NIST	Organoheterocyclic compounds	Lactones	Gamma butyrolactones	HMDB0041862	D-Glucaro-1,4-lactone								XECPAIJNBXCOBO-QCTYKIHNSA-N	C6H8O7	1	2M-H	383.043		6.49	6.65	33.3333	23.4995	38.3459	89.4737	-0.238352	0.0200462	0.14946	-0.0692855	0.602378	0.993093	-0.0324247	0.901928	0.769107	-0.188496	0.077467	0.480721	-0.0905096	0.119453	0.382475
TAG O-60:3	TAG-O	RP_PosMS1_1497		Y	GL	TG O-16:0_22:0_22:3 M+Na Atlas --- TG O-16:0_22:1_22:2 M+Na Atlas --- TG O-16:1_22:0_22:2 M+Na Atlas --- TG O-16:1_22:1_22:1 M+Na Atlas --- TG O-16:2_22:0_22:1 M+Na Atlas --- TG O-16:3_22:0_22:0 M+Na Atlas --- TG O-18:0_20:0_22:3 M+Na Atlas --- TG O-18:0_20:1_22:2 M+Na Atlas --- TG O-18:0_20:2_22:1 M+Na Atlas --- TG O-18:0_20:3_22:0 M+Na Atlas --- TG O-18:1_20:0_22:2 M+Na Atlas --- TG O-18:1_20:1…	Lipids and lipid-like molecules	Glycerolipids	Triradylcglycerols	HMDB0051713, HMDB0054460	TG(22:1(13Z)/20:2n6/O-18:0) --- TG(22:2(13Z,16Z)/20:1(11Z)/O-18:0)								ABZHETQGVCPMBQ-VBOJLMESNA-N, ANXQHDZFRYWBTF-XXAXVSCKNA-N, BQAGVWQLJYCCQC-KYDHCSDMNA-N, BYUHVHOEMAUVOT-YNBUDPQPNA-N, CBQQNSRQTWHWRK-YTMLWYSLNA-N, CFBHBEFRKVIMGS-NWGAISRUNA-N, COEUMVYQNSQUFL-ZTIAFBIUNA-N, CRYMDHGTBOJMBC-ONNNFCEENA-N, DCFJNAUYKHWWMK-IAOURHDLNA-N, DKJWBYZJSZJBRP-SOPHAYRKNA-N, DKKNHWPNLXHWOG-CRNCYVPCNA-N, FTTUWJAWSYLJSX-VBDLYWFTNA-N, HMJUGVCLPAMWIF-KLPSYGLONA-N, HRMIOBKJNFMPLQ-NCSSCBR…	C63H118O5	1	M+Na	977.884		12.38	12.34	52.4194	18.2018	89.313	100	0.264721	0.020068	0.14946	0.342043	0.0189828	0.985013	0.220381	0.450232	0.765052	0.0264318	0.824961	0.816992	0.160824	0.0119008	0.245949
N-Acetyl-L-methionine	Amino acids, peptides, and analogues	HILIC_NegMSMS_261			nonGL	N-Acetyl-L-methionine M-H HMDB --- N-Acetylmethionine M-H FiehnHILIC	Organic acids and derivatives	Carboxylic acids and derivatives	Amino acids, peptides, and analogues	HMDB0011745	N-Acetyl-L-methionine								XUYPXLNMDZIRQH-LURJTMIESA-N, XUYPXLNMDZIRQH-UHFFFAOYNA-N	C7H13NO3S	1	M-H	190.054		3.41	3.44	90.7859	13.6702	86.4662	99.1228	-0.257722	0.0207515	0.149487	-0.123942	0.390765	0.985013	-0.338696	0.23479	0.765052	0.009645	0.934288	0.833368	-0.122331	0.0521038	0.336408
N-Formyl-L-methionine	Amino acids, peptides, and analogues	HILIC_PosMS1_411	RT_1		nonGL	Luminol M+H NIST --- N-Formyl-L-methionine M+H HMDB	Organic acids and derivatives	Carboxylic acids and derivatives	Amino acids, peptides, and analogues	HMDB0001015	N-Formyl-L-methionine								HWYHZTIRURJOHG-UHFFFAOYSA-N, PYUSHNKNPOHWEZ-YFKPBYRVSA-N	C6H11NO3S, C8H7N3O2	1	M+H	178.058		16.34	16.33	61.0811	19.0397	82.7068	100	-0.25749	0.0207594	0.149487	-0.126013	0.382466	0.985013	-1.08138	8.45758e-05	0.0642214	0.121791	0.29609	0.653825	-0.159342	0.0107938	0.245949
PI 35:1	PI	HILIC_NegMS1_1431		Y	nonGL	PI 11:0_24:1 M-H Atlas --- PI 13:0_22:1 M-H Atlas --- PI 14:0_21:1 M-H Atlas --- PI 15:0_20:1 M-H Atlas --- PI 16:0_19:1 M-H Atlas --- PI 17:0_18:1 M-H Atlas --- PI 18:0_17:1 M-H Atlas --- PI 19:0_16:1 M-H Atlas --- PI 20:0_15:1 M-H Atlas --- PI 21:0_14:1 M-H Atlas --- PI 22:0_13:1 M-H Atlas --- PI 9:0_26:1 M-H Atlas						Glycerophospholipids [GP]	Glycerophosphoinositols [GP06]	Diacylglycerophosphoinositols [GP0601]	LMGP06010119 --- LMGP06010164 --- LMGP06010281 --- LMGP06010426 --- LMGP06010481 --- LMGP06010646 --- LMGP06010864	PI(15:0/20:1(11Z)) --- PI(16:0/19:1(9Z)) --- PI(17:0/18:1(9Z)) --- PI(18:0/17:1(9Z)) --- PI(19:0/16:1(9Z)) --- PI(20:0/15:1(9Z)) --- PI(21:0/14:1(9Z))	PI 35:1	PI 14:1_21:0 --- PI 15:0_20:1 --- PI 15:1_20:0 --- PI 16:0_19:1 --- PI 16:1_19:0 --- PI 17:0_18:1 --- PI 17:1_18:0	AIZXTBURYQEMPJ-ZCXUNETKNA-N, CMMAGGBEJVLYKB-MSUUIHNZNA-N, DMLJMECDZIRCDW-NTMALXAHNA-N, GERQWDJOUGDFSC-ZCXUNETKNA-N, GKUKGYFEUVIJLT-VLGSPTGONA-N, MFJIYOTYKUAUKN-ZCXUNETKNA-N, NPAUVQALSMSELR-ZPHPHTNENA-N, NUFBAIQZHNWWAZ-OWBHPGMINA-N, OCRWDIGYHZWQGF-MSUUIHNZNA-N, PDGLZWPDSVMVGS-HNENSFHCNA-N, VIMCTYSHLHCANV-PEZBUJJGNA-N, YOBVQVOUFSXWJZ-BENRWUELNA-N	C44H83O13P	1	M-H	849.544		9.05	9.13	16.2602	18.7804	39.0977	100	0.259117	0.0207714	0.149487	0.145715	0.31533	0.985013	0.157602	0.583512	0.765052	-0.133991	0.253117	0.634176	0.118032	0.0625688	0.336408
TAG 59:6	TAG	RP_PosMS1_1474		Y	GL	TG 10:0_11:0_38:6 M+NH4 Atlas --- TG 10:0_13:0_36:6 M+NH4 Atlas --- TG 10:0_13:1_36:5 M+NH4 Atlas --- TG 10:0_15:0_34:6 M+NH4 Atlas --- TG 10:0_15:1_34:5 M+NH4 Atlas --- TG 10:0_17:0_32:6 M+NH4 Atlas --- TG 10:0_17:1_32:5 M+NH4 Atlas --- TG 10:0_17:2_32:4 M+NH4 Atlas --- TG 10:0_19:0_30:6 M+NH4 Atlas --- TG 10:0_19:1_30:5 M+NH4 Atlas --- TG 10:0_19:2_30:4 M+NH4 Atlas --- TG 10:0_21:0_28:6 M+NH4 A…	Lipids and lipid-like molecules	Glycerolipids	Triradylcglycerols	HMDB0043132, HMDB0043363	TG(15:0/22:0/22:6(4Z,7Z,10Z,13Z,16Z,19Z)) --- TG(15:0/22:1(13Z)/22:5(7Z,10Z,13Z,16Z,19Z))	Glycerolipids [GL]	Triradylglycerols [GL03]	Triacylglycerols [GL0301]	LMGL03011279 --- LMGL03011280 --- LMGL03011324 --- LMGL03011335 --- LMGL03011344 --- LMGL03011378 --- LMGL03011379 --- LMGL03011385 --- LMGL03011435 --- LMGL03011440 --- LMGL03011479 --- LMGL03011535 --- LMGL03011542 --- LMGL03011679 --- LMGL03011687 --- LMGL03012923 --- LMGL03015340 --- LMGL03015690 --- LMGL03015697 --- LMGL03016201 --- LMGL03016337 --- LMGL03016535 --- LMGL03016564 --- LMGL0301…	TG(15:0/22:0/22:6(4Z,7Z,10Z,13Z,16Z,19Z))[iso6] --- TG(15:0/22:3(10Z,13Z,16Z)/22:3(10Z,13Z,16Z))[iso3] --- TG(15:1(9Z)/22:0/22:5(7Z,10Z,13Z,16Z,19Z))[iso6] --- TG(15:1(9Z)/22:2(13Z,16Z)/22:3(10Z,13Z,16Z))[iso6] --- TG(16:0/21:0/22:6(4Z,7Z,10Z,13Z,16Z,19Z))[iso6] --- TG(16:1(9Z)/21:0/22:5(7Z,10Z,13Z,16Z,19Z))[iso6] --- TG(17:0/20:0/22:6(4Z,7Z,10Z,13Z,16Z,19Z))[iso6] --- TG(17:0/20:1(11Z)/22:5(7Z,1…	TG 59:6	TG 15:0_22:0_22:6 --- TG 15:0_22:3_22:3 --- TG 15:1_22:0_22:5 --- TG 15:1_22:2_22:3 --- TG 16:0_21:0_22:6 --- TG 16:1_21:0_22:5 --- TG 17:0_20:0_22:6 --- TG 17:0_20:1_22:5 --- TG 17:0_20:5_22:1 --- TG 17:1_20:0_22:5 --- TG 17:1_20:2_22:3 --- TG 17:1_20:5_22:0 --- TG 17:2_20:1_22:3 --- TG 17:2_20:2_22:2 --- TG 18:0_19:0_22:6 --- TG 18:0_19:1_22:5 --- TG 18:1_19:0_22:5 --- TG 18:1_20:5_21:0 --- TG …	ABYSCRNQSDEDOZ-UIZGHKFKNA-N, ACTZOYBBDCOTMF-RRGCYIAVNA-N, ADSYTCPCLCYGNX-BAEAFIMDNA-N, AEKICJDCDBYGFL-SCXSKNBXNA-N, AGXIGFLBMGIFOZ-BTFPNSQJNA-N, AORVUYKTXIEBRE-YHPMQPPQNA-N, APLGRNNMDNLZOK-PZXPEBJFNA-N, ATDKOAVKEFUBEH-NNPJKANVNA-N, ATHPAVFEQVQTIO-WYKJHYIMNA-N, AURYFJYNFYHJQM-PDLHVDKGNA-N, AWFYVMGTPLJFET-BKIOVJSENA-N, AYRJATMEQUGRKY-USWXWGRZNA-N, BAAJAOGLDXWCJJ-BNUNXXKTNA-N, BAIZRHVSGALDTG-VEWXFON…	C62H108O6	1	M+NH4	966.848		12.01	11.95	67.4731	9.20383	99.2366	100	0.255765	0.0209167	0.149487	-0.119414	0.405372	0.985013	0.168068	0.554017	0.765052	-0.067382	0.561796	0.756445	0.0662855	0.292752	0.468677
TAG 53:4	TAG	RP_PosMSMS_1297, 1313		Y	GL	TG 17:1_18:1_18:2 M+NH4 Atlas, TG 17:1_18:1_18:2 M+Na Atlas --- TG 17:2_18:1_18:1 M+Na Atlas						Glycerolipids [GL]	Triradylglycerols [GL03]	Triacylglycerols [GL0301]	LMGL03010190, LMGL03010187 --- LMGL03010190	TG(17:1(9Z)/18:1(9Z)/18:2(9Z,12Z))[iso6], TG(17:1(9Z)/18:1(9Z)/18:2(9Z,12Z))[iso6] --- TG(17:2(9Z,12Z)/18:1(9Z)/18:1(9Z))[iso3]	TG 53:4	TG 17:1_18:1_18:2, TG 17:1_18:1_18:2 --- TG 17:2_18:1_18:1	VESVDAJIPQIOEH-SWVQGCAJNA-N, BMSDHYZLQWTKSQ-UANKMODMNA-N, VESVDAJIPQIOEH-SWVQGCAJNA-N	C56H100O6	1	M+NH4, M+Na	886.7801, 891.7357		10.74	10.715	84.4086	13.5871	98.4733	100	0.257883	0.0213251	0.150446	-0.0170408	0.906701	0.997945	0.191384	0.505151	0.765052	-0.12539	0.284779	0.653825	0.0878787	0.167002	0.408222
DAG 36:2	DAG	RP_PosMS1, MSMS_539, 565		Y	GL	1-Stearoyl-2-linoleoyl-sn-glycerol M+H NIST, DG 18:1_18:1 M+NH4 Atlas	Lipids and lipid-like molecules	Fatty Acyls --- Glycerolipids	Lineolic acids and derivatives --- Diradylglycerols	HMDB0007161, HMDB0007218, HMDB0244087	DG(18:0/18:2(9Z,12Z)/0:0) --- DG(18:1(9Z)/18:1(9Z)/0:0) --- 1,2-Dioleoyl-rac-glycerol	Glycerolipids [GL]	Diradylglycerols [GL02]	Diacylglycerols [GL0201]	LMGL02010050, LMGL02010049	DG(18:0/18:2(9Z,12Z)/0:0)[iso2], DG(18:1(9Z)/18:1(9Z)/0:0)	DG 36:2	DG 18:0_18:2, DG 18:1_18:1	AJMZUFBKADIAKC-SKTOPKGQSA-N, AFSHUZFNMVJNKX-CLFAGFIQNA-N	C39H72O5	1	M+H, M+NH4	621.5406, 638.5679		7.75	7.705	67.7419	12.5433	100	100	0.246684	0.0214761	0.150446	0.025469	0.85486	0.993093	0.229908	0.402883	0.765052	0.00852237	0.939659	0.833368	0.0944425	0.120487	0.383982
PC O-38:3	PC-O	RP_NegMS1_652		Y	nonGL	PC O-10:0_28:3 M+HCOO Atlas --- PC O-11:0_26:3 M+CH3COO Atlas --- PC O-12:0_26:3 M+HCOO Atlas --- PC O-13:0_24:3 M+CH3COO Atlas --- PC O-13:1_24:2 M+CH3COO Atlas --- PC O-14:0_24:3 M+HCOO Atlas --- PC O-14:1_24:2 M+HCOO Atlas --- PC O-15:0_22:3 M+CH3COO Atlas --- PC O-15:1_22:2 M+CH3COO Atlas --- PC O-16:0_22:3 M+HCOO Atlas --- PC O-16:1_21:2 M+CH3COO Atlas --- PC O-16:1_22:2 M+HCOO Atlas --- PC …	Lipids and lipid-like molecules	Glycerophospholipids	Glycerophosphocholines	HMDB0013440	PC(O-20:0/18:3(9Z,12Z,15Z))	Glycerophospholipids [GP]	Glycerophosphocholines [GP01]	1-alkyl,2-acylglycerophosphocholines [GP0102]	LMGP01020230	PC(O-20:0/18:3(9Z,12Z,15Z))	PC O-38:3	PC O-20:0/18:3	AIPOEDDCQSOLAM-KGDVCNTENA-N, APWUUZRAVVATRC-QHVUHFLTNA-N, ASHBBEDZDQCVBU-CWOPMICQNA-N, AZBVEKFBWATUFZ-HQCYBMNRNA-N, BARIVPROIGRHKO-UVQSURNNNA-N, BEAGKOIPCDJGEA-UDJAPEQQNA-N, BGQNQSQEHPHSAN-UQNIBARNNA-N, BJOVSSMDDAHLKS-UVQSURNNNA-N, BXDMDGNVJWJRPX-YVCOGYDTNA-N, CCFHTEKSYCSUKI-JOIBFBEQNA-N, CCSNYBCLXCAGAQ-BWLKTXTJNA-N, CTWLKQATLCYQEQ-MLWYYCKJNA-N, CYCLQOSTHRLNBD-UVQSURNNNA-N, DIICDUQCMPXNJB-WDTHWML…	C46H88NO7P	1	M+CH3COO --- M+HCOO --- M-H	842.627		7.09	7.09	58.221	24.5093	97.7099	100	-0.24838	0.0222185	0.153007	-0.253197	0.0701582	0.985013	-0.346789	0.211675	0.765052	-0.134676	0.235728	0.627436	-0.144732	0.0178235	0.250915
MAG 17:0	MAG	HILIC_PosMS1_1271		Y	GL	DG O-10:0_7:0 M+NH4 Atlas --- DG O-11:0_6:0 M+NH4 Atlas --- DG O-12:0_5:0 M+NH4 Atlas --- DG O-13:0_4:0 M+NH4 Atlas --- DG O-14:0_3:0 M+NH4 Atlas --- DG O-15:0_2:0 M+NH4 Atlas --- DG O-8:0_9:0 M+NH4 Atlas --- DG O-9:0_8:0 M+NH4 Atlas --- MG 17:0 M+NH4 Atlas	Lipids and lipid-like molecules	Glycerolipids	Monoradylglycerols	HMDB0072856	MG(17:0/0:0/0:0)	Glycerolipids [GL]	Monoradylglycerols [GL01]	Monoacylglycerols [GL0101]	LMGL01010002	MG(17:0/0:0/0:0)[rac]	MG 17:0	MG 17:0	AXXGGLOBVAEKPV-UHFFFAOYNA-N, BIYAZYVCFIJFRW-UHFFFAOYNA-N, CALQJHCOSALRKD-UHFFFAOYNA-N, IFTHUTUQYXKGTI-UHFFFAOYNA-N, ROVPFIYEMNRRCZ-UHFFFAOYNA-N, SVUQHVRAGMNPLW-UHFFFAOYNA-N, UYYUAQUMOJHPEB-UHFFFAOYNA-N, WDROXEIWAMBNJT-UHFFFAOYNA-N, WNGLYSSCCIHMTP-UHFFFAOYNA-N	C20H40O4	1	M+NH4	362.324		1.24	1.25	73.2432	29.2262	95.4887	100	-0.250854	0.0222742	0.153007	-0.104678	0.461782	0.985013	-0.274569	0.328451	0.765052	0.121124	0.291562	0.653825	-0.113267	0.0680438	0.348916
TAG 58:5	TAG	RP_PosMSMS_1452, 1460		Y	GL	TG 18:0_18:1_22:4 M+NH4 Atlas, TG 18:0_18:0_22:5 M+Na Atlas --- TG 18:2_18:2_22:1 M+Na Atlas	Lipids and lipid-like molecules	Glycerolipids	Triradylcglycerols	HMDB0044773, HMDB0051665	TG(18:0/18:0/22:5(7Z,10Z,13Z,16Z,19Z)) --- TG(22:1(13Z)/18:2(9Z,12Z)/18:2(9Z,12Z))	Glycerolipids [GL]	Triradylglycerols [GL03]	Triacylglycerols [GL0301]	LMGL03011124 --- LMGL03011150	TG(18:0/18:0/22:5(7Z,10Z,13Z,16Z,19Z))[iso3] --- TG(18:2(9Z,12Z)/18:2(9Z,12Z)/22:1(13Z))[iso3]	TG 58:5	TG 18:0_18:0_22:5 --- TG 18:2_18:2_22:1	XXQLXVNLMLDWDQ-XNRINBKZNA-N, BMAGIXXDTYUYPM-ROCGWMDANA-N, SRYYVIJJOHXIGQ-KNNVLUOCNA-N	C61H108O6	2, 1	M+NH4, M+Na	954.841, 959.7972	681.58	11.355	11.29	55.1075	29.89	84.7328	100	0.250404	0.0228448	0.155417	0.0443009	0.756274	0.993093	0.289798	0.30333	0.765052	-0.0257456	0.823484	0.816992	0.102216	0.100953	0.369753
DAG 34:2	DAG	RP_PosMSMS_518		Y	GL	DG 16:0_18:2 M+NH4 Atlas	Lipids and lipid-like molecules	Fatty Acyls	Lineolic acids and derivatives	HMDB0007103, HMDB0251102	DG(16:0/18:2(9Z,12Z)/0:0) --- 1-O-Palmitoyl-2-O-linoleoyl-D-glycerol	Glycerolipids [GL]	Diradylglycerols [GL02]	Diacylglycerols [GL0201]	LMGL02010027	DG(16:0/18:2(9Z,12Z)/0:0)[iso2]	DG 34:2	DG 16:0_18:2	SVXWJFFKLMLOHO-BCTRXSSUNA-N	C37H68O5	2	M+NH4	610.537	313.272	7.16	7.16	66.3978	23.273	95.4198	100	0.249405	0.0232294	0.156362	-0.0256423	0.857269	0.993093	0.261608	0.352418	0.765052	-0.0166945	0.884855	0.828239	0.087	0.162944	0.4041
L-Threonine --- L-Allothreonine ---L- Homoserine	Amino acids, peptides, and analogues	HILIC_PosMSMS_118			nonGL	(R)-3-Amino-4-hydroxybutyric acid; LC-ESI-QTOF; MS2; CE M+H MassBank --- (S)-3-Amino-4-hydroxybutyric acid; LC-ESI-QTOF; MS2; CE M+H MassBank --- Allothreonine M+H FiehnHILIC, Threonine M+H FiehnHILIC --- D-Threonine M+H HMDB --- Homoserine M+H FiehnHILIC --- L-(-)-Threonine; LC-ESI-ITFT; MS2; m/z M+H MassBank --- L-Allothreonine M+H HMDB --- L-Homoserine M+H NIST --- L-Homoserine; LC-ESI-ITFT; M…	Organic acids and derivatives	Carboxylic acids and derivatives	Amino acids, peptides, and analogues	HMDB0000167, HMDB0000719, HMDB0004041, HMDB0250801	L-Threonine --- L-Homoserine --- L-Allothreonine --- D-Threonine								AYFVYJQAPQTCCC-GBXIJSLDSA-N, AYFVYJQAPQTCCC-HRFVKAFMSA-N, AYFVYJQAPQTCCC-UHFFFAOYNA-N, AYFVYJQAPQTCCC-UHFFFAOYSA-N, BUZICZZQJDLXJN-GSVOUGTGSA-N, BUZICZZQJDLXJN-VKHMYHEASA-N, CDUUKBXTEOFITR-UHFFFAOYNA-N, KNTFCRCCPLEUQZ-UHFFFAOYSA-N, PSFABYLDRXJYID-UHFFFAOYNA-N, UKAUYVFTDYCKQA-UHFFFAOYNA-N, UKAUYVFTDYCKQA-VKHMYHEASA-N	C4H9NO3	1	M+H	120.064		13.64	13.63	41.3514	25.4574	25.5639	100	0.253918	0.0234257	0.156362	-0.0495048	0.733369	0.993093	-0.0971503	0.735299	0.765052	0.0212239	0.856689	0.825812	0.066101	0.299489	0.469318
TAG 62:15	TAG	RP_PosMSMS_1521, 1532		Y	GL	TG 20:4_20:5_22:6 M+NH4 Atlas, TG 20:4_20:5_22:6 M+Na Atlas	Lipids and lipid-like molecules	Glycerolipids	Triradylcglycerols	HMDB0055669	TG(20:4(8Z,11Z,14Z,17Z)/20:5(5Z,8Z,11Z,14Z,17Z)/22:6(4Z,7Z,10Z,13Z,16Z,19Z))								ZRIKAMSSPHWCKG-RBOFUSPWNA-N	C65H96O6	1	M+NH4, M+Na	990.7481, 995.7034		9.66	9.63	46.2366	27.5344	43.5115	100	0.237138	0.0240156	0.158802	0.114682	0.399358	0.985013	0.383862	0.152305	0.765052	0.0463759	0.673794	0.785957	0.116251	0.0500782	0.336408
PC 40:5	PC	RP_PosMSMS_1142, 1209		Y	nonGL	PC 18:0_22:5 M+H Atlas, PC 40:5 M+Na Atlas	Lipids and lipid-like molecules	Glycerophospholipids	Glycerophosphocholines	HMDB0008056	PC(18:0/22:5(7Z,10Z,13Z,16Z,19Z))	Glycerophospholipids [GP]	Glycerophosphocholines [GP01]	Diacylglycerophosphocholines [GP0101]	LMGP01010818	PC(18:0/22:5(7Z,10Z,13Z,16Z,19Z))	PC 40:5	PC 18:0_22:5	MAAMGQXOTCBPFS-CYDMDVBXNA-N, MJBMAGWKWXUKMV-OFWSBFIXNA-N, OCNPTLYNFQOCIS-MFPUCXCHNA-N	C48H86NO8P	1, 2	M+H, M+Na	836.6082, 858.5919	675.532	6.525	6.545	68.2796	8.91473	94.6565	100	0.247631	0.0243474	0.159505	0.0837974	0.556647	0.988506	0.295453	0.293639	0.765052	-0.12445	0.279262	0.652632	0.109245	0.0791136	0.363249
TAG 55:9	TAG	RP_PosMS1_1343		Y	GL	TG 10:0_11:0_34:9 M+NH4 Atlas --- TG 10:0_13:0_32:9 M+NH4 Atlas --- TG 10:0_13:1_32:8 M+NH4 Atlas --- TG 10:0_15:1_30:8 M+NH4 Atlas --- TG 10:0_17:2_28:7 M+NH4 Atlas --- TG 10:0_19:2_26:7 M+NH4 Atlas --- TG 11:0_12:0_32:9 M+NH4 Atlas --- TG 11:0_14:1_30:8 M+NH4 Atlas --- TG 11:0_16:2_28:7 M+NH4 Atlas --- TG 11:0_16:3_28:6 M+NH4 Atlas --- TG 11:0_16:4_28:5 M+NH4 Atlas --- TG 11:0_18:2_26:7 M+NH4 A…	Lipids and lipid-like molecules	Glycerolipids	Triradylcglycerols	HMDB0043654, HMDB0043682, HMDB0043710	TG(15:0/18:3(9Z,12Z,15Z)/22:6(4Z,7Z,10Z,13Z,16Z,19Z)) --- TG(15:0/18:4(6Z,9Z,12Z,15Z)/22:5(7Z,10Z,13Z,16Z,19Z)) --- TG(15:0/20:4(8Z,11Z,14Z,17Z)/20:5(5Z,8Z,11Z,14Z,17Z))	Glycerolipids [GL]	Triradylglycerols [GL03]	Triacylglycerols [GL0301]	LMGL03010681 --- LMGL03010682 --- LMGL03010854 --- LMGL03013088 --- LMGL03015219 --- LMGL03015234 --- LMGL03015535 --- LMGL03015569 --- LMGL03015941	TG(15:0/18:3(9Z,12Z,15Z)/22:6(4Z,7Z,10Z,13Z,16Z,19Z))[iso6] --- TG(15:0/18:4(6Z,9Z,12Z,15Z)/22:5(7Z,10Z,13Z,16Z,19Z))[iso6] --- TG(15:1(9Z)/18:2(9Z,12Z)/22:6(4Z,7Z,10Z,13Z,16Z,19Z))[iso6] --- TG(15:1(9Z)/18:3(9Z,12Z,15Z)/22:5(7Z,10Z,13Z,16Z,19Z))[iso6] --- TG(16:1(9Z)/17:2(9Z,12Z)/22:6(4Z,7Z,10Z,13Z,16Z,19Z))[iso6] --- TG(17:0/18:4(6Z,9Z,12Z,15Z)/20:5(5Z,8Z,11Z,14Z,17Z))[iso6] --- TG(17:1(9Z)/18:…	TG 55:9	TG 15:0_18:3_22:6 --- TG 15:0_18:4_22:5 --- TG 15:1_18:2_22:6 --- TG 15:1_18:3_22:5 --- TG 16:1_17:2_22:6 --- TG 17:0_18:4_20:5 --- TG 17:1_18:3_20:5 --- TG 17:2_18:2_20:5 --- TG 18:4_18:4_19:1	ACNNTKLSZQQQKP-FXZWXQSANA-N, AFDJUNKTFRBTJR-MSPREIMINA-N, AFHMLHSZVWBZQC-XRCPUKGLNA-N, AFKHNQOTUOVPSY-MZYYPCICNA-N, ANMCRRUWKDVICV-CUPNEJRENA-N, APSWDBMMSAVNIL-XDTAQBNDNA-N, BASBBLAEGLYGFW-WJWRZQCENA-N, BHFNPIFQXGSRRM-JYWNAVNUNA-N, BNVVILLZZXJTHL-IPXNLGCINA-N, BOJASBUDPYZVEN-FIAMGHDUNA-N, BRBIBAKHCVJZSR-PBWZYCNBNA-N, CBCJXQJAYSAQTE-HAHICZMCNA-N, CNDQEKIUKYBQHM-HCKPUZORNA-N, CRHQNGLILBZGOE-FKDQBZN…	C58H94O6	1	M+NH4	904.738		10.68	10.66	99.1935	11.0647	100	100	0.254819	0.0245836	0.159575	-0.0449307	0.759904	0.993093	0.283844	0.327822	0.765052	-0.10543	0.374287	0.676013	0.0860889	0.18085	0.422395
PI 36:3	PI	RP_PosMSMS_1286		Y	nonGL	PI 36:3 M+Na Atlas													MNAWEWOEUPZGNZ-NKTIKPMXNA-N	C45H81O13P	1	M+Na	883.524		5.02	5	37.0968	26.4904	30.5344	100	0.24717	0.0249312	0.16036	0.181538	0.202348	0.985013	0.516684	0.0652935	0.765052	0.0775789	0.501679	0.727468	0.138902	0.0251821	0.272606
FA 6:0;O2 --- FA 6:1;O	FA - Fatty Acids and Conjugates --- FA - Fatty esters	HILIC_PosMS1_164		Y	nonGL	2H-Pyran-2-one, tetrahydro-4-hydroxy-4-methyl-, (R)- M+H HMDB --- 4-Acetylbutyric acid M+H FiehnHILIC --- 4-Methyl-2-oxovaleric acid M+H NIST --- 4-Oxohexanoic acid M+H NIST --- 5,6-Dihydro-6-methyl-4H-1,3-thiazin-2-amine M+H NIST --- DL-Mevalonic acid lactone M+H NIST --- Mevalonic acid M+H-H2O NIST --- Mevalonolactone M+H HMDB	Lipids and lipid-like molecules --- Organic acids and derivatives --- Organoheterocyclic compounds	Fatty Acyls --- Keto acids and derivatives --- Lactones --- Thiazines	Fatty acids and conjugates --- Short-chain keto acids and derivatives --- Delta valerolactones --- 1,3-thiazines	HMDB0000227, HMDB0000695, HMDB0006024, HMDB0061881, HMDB0244840, HMDB0244999	Mevalonic acid --- Ketoleucine --- Mevalonolactone --- 4-Acetylbutyrate --- 2H-Pyran-2-one, tetrahydro-4-hydroxy-4-methyl-, (R)- --- 6-Methyl-5,6-dihydro-4H-1,3-thiazin-2-amine	Fatty Acyls [FA]	Fatty Acids and Conjugates [FA01] --- Fatty esters [FA07]	Hydroxy fatty acids [FA0105] --- Lactones [FA0704] --- Oxo fatty acids [FA0106]	LMFA01050352 --- LMFA01060009 --- LMFA01060010 --- LMFA07040003	4-Hydroxy-4-methyltetrahydro-2H-pyran-2-one --- 4-keto-n-caproic acid --- 5-keto-n-caproic acid --- Mevalonic acid	FA 6:0;O2 --- FA 6:1;O		BATVOUKHGLKDGQ-UHFFFAOYSA-N, BKAJNAXTPSGJCU-UHFFFAOYSA-N, CLJBDOUIEHLLEN-UHFFFAOYSA-N, JYVXNLLUYHCIIH-LURJTMIESA-N, JYVXNLLUYHCIIH-UHFFFAOYSA-N, KJTLQQUUPVSXIM-ZCFIWIBFSA-N, MGTZCLMLSSAXLD-UHFFFAOYSA-N	C5H10N2S, C6H10O3, C6H12O4	1	M+H --- M+H-H2O	131.068		10.84	10.84	86.2162	22.6972	100	100	0.249194	0.0253209	0.1614	0.17733	0.218073	0.985013	0.333162	0.242061	0.765052	0.0372797	0.749641	0.80495	0.129665	0.0390669	0.322458
Thiourea	Others	HILIC_PosMS1_19			nonGL	Thiourea M+H HMDB	Organosulfur compounds	Thioureas		HMDB0034155	Thiourea								UMGDCJDMYOKAJW-UHFFFAOYSA-N	CH4N2S	1	M+H	77.0132		10.18	10.19	98.9189	22.1053	98.4962	100	-0.247333	0.0258162	0.163087	0.016221	0.910257	0.997945	-0.462593	0.101723	0.765052	0.0265804	0.819289	0.816992	-0.0980903	0.118649	0.382475
(R)-Lavandulol --- endo-Borneol	Xenobiotics	HILIC_PosMSMS_201			nonGL	(.+/-.)-Lavandulol M+H-H2O NIST --- endo-Borneol M+H-H2O NIST	Lipids and lipid-like molecules	Prenol lipids	Monoterpenoids	HMDB0036041, HMDB0249350	(R)-Lavandulol --- (2S,4R)-1,7,7-Trimethylbicyclo[2.2.1]heptan-2-ol								CZVXBFUKBZRMKR-UHFFFAOYSA-N, DTGKSKDOIYIVQL-UHFFFAOYSA-N	C10H18O	1	M+H-H2O	137.132		1.25	1.25	98.9189	12.529	100	100	-0.243986	0.0264663	0.165395	-0.123352	0.38604	0.985013	-0.322298	0.25136	0.765052	0.204457	0.0737872	0.475	-0.117054	0.0594324	0.336408
SM 36:0;O2	SM	RP_PosMSMS_811, 877		Y	nonGL	SM 34:0;2O/2:0 M+H Atlas, SM 36:0;2O M+Na Atlas													JQJUFGDGTNWYGG-UHFFFAOYNA-N, PHNFTZCCMGFGHC-UHFFFAOYNA-N	C41H85N2O6P	1	M+H, M+Na	733.6172, 755.5987		6.425	6.35	69.8925	18.9238	90.0763	100	0.246873	0.0268368	0.165395	0.0891363	0.537229	0.985013	0.0825333	0.772801	0.765052	-0.01324	0.909835	0.832797	0.0995184	0.115059	0.382475
Indole-3-acetamide	Indoles and derivatives	HILIC_PosMSMS_405			nonGL	Indole-3-acetamide M+H HMDB	Organoheterocyclic compounds	Indoles and derivatives	Indoles	HMDB0029739	Indole-3-acetamide								ZOAMBXDOGPRZLP-UHFFFAOYSA-N	C10H10N2O	1	M+H	175.086		10.53	10.82	91.6216	26.0908	99.2481	100	0.240608	0.0268829	0.165395	0.135367	0.335821	0.985013	0.120677	0.664924	0.765052	0.00611351	0.957225	0.835284	0.108345	0.0779798	0.363249
PI 32:1	PI	HILIC_NegMS1_1378		Y	nonGL	PI 10:0_22:1 M-H Atlas --- PI 11:0_21:1 M-H Atlas --- PI 12:0_20:1 M-H Atlas --- PI 13:0_19:1 M-H Atlas --- PI 14:0_18:1 M-H Atlas --- PI 15:0_17:1 M-H Atlas --- PI 16:0_16:1 M-H Atlas --- PI 17:0_15:1 M-H Atlas --- PI 18:0_14:1 M-H Atlas --- PI 19:0_13:1 M-H Atlas --- PI 6:0_26:1 M-H Atlas --- PI 8:0_24:1 M-H Atlas --- PMeOH 22:5_22:6 M-H Atlas	Lipids and lipid-like molecules	Glycerophospholipids	Glycerophosphoinositols	HMDB0009779	PI(16:0/16:1(9Z))	Glycerophospholipids [GP]	Glycerophosphoinositols [GP06]	Diacylglycerophosphoinositols [GP0601]	LMGP06010027 --- LMGP06010050 --- LMGP06010111 --- LMGP06010196 --- LMGP06010277 --- LMGP06010881 --- LMGP06010960	PI(12:0/20:1(11Z)) --- PI(13:0/19:1(9Z)) --- PI(14:0/18:1(9Z)) --- PI(15:0/17:1(9Z)) --- PI(16:0/16:1(9Z)) --- PI(17:0/15:1(9Z)) --- PI(18:0/14:1(9Z))	PI 32:1	PI 12:0_20:1 --- PI 13:0_19:1 --- PI 14:0_18:1 --- PI 14:1_18:0 --- PI 15:0_17:1 --- PI 15:1_17:0 --- PI 16:0_16:1	BULMMLBXUWTYIM-PFONDFGANA-N, BYMPXXIMCOADAJ-BENRWUELNA-N, DTJJTFMDHAUPET-NXVVXOECNA-N, GBOLMXKIBIRCIT-ICFOKQHNNA-N, IQWCOIUQPOWEBD-NXVVXOECNA-N, JAVDLOQFOQZXOB-PFONDFGANA-N, JLGOXIPEFGVEDZ-ZCXUNETKNA-N, KNFZSKCDYQXLOZ-MSUUIHNZNA-N, MPFAQJGPDDXGFP-OWBHPGMINA-N, QAWXBJDYTIBLRK-PEZBUJJGNA-N, SEWGNFSXDLWWSL-MSUUIHNZNA-N, TUTGRPQTZNQHAV-XPTQMGEGNA-N, URKMQCASNHPHQI-NTMALXAHNA-N	C41H77O13P	1	M-H	807.5		9.1	9.18	57.4526	16.8452	90.2256	100	0.245275	0.0280076	0.17083	0.210253	0.144154	0.985013	0.161173	0.573004	0.765052	0.082457	0.48049	0.716738	0.126286	0.0448945	0.336408
PG 37:0	PG	RP_NegMSMS_518		Y	nonGL	PG 18:0_19:0 M-H Atlas						Glycerophospholipids [GP]	Glycerophosphoglycerols [GP04]	Diacylglycerophosphoglycerols [GP0401]	LMGP04010317	PG(18:0/19:0)	PG 37:0	PG 18:0_19:0	XQABIPXCSRJGET-UHFFFAOYNA-N	C43H85O10P	2	M-H	791.583	283.264	3.97	3.94	42.8571	19.4201	44.2748	100	-0.244613	0.0282589	0.170889	-0.184625	0.199712	0.985013	-0.124463	0.663118	0.765052	0.179661	0.122034	0.519961	-0.119314	0.0580879	0.336408
CE 20:5	CE	RP_PosMSMS, MS1_675, 692		Y	nonGL	CE 20:5 M+NH4 Atlas, CE 20:5 M+Na Atlas	Lipids and lipid-like molecules	Steroids and steroid derivatives	Steroid esters	HMDB0006731, HMDB0245571	CE(20:5(5Z,8Z,11Z,14Z,17Z)) --- Cholesteryl (5Z,8Z,11Z,14Z,17Z-eicosapentaenoate)	Sterols [ST]	Sterols [ST01]	Cholesteryl esters [ST0102]	LMST01020015	20:5 Cholesterol ester	CE 20:5		XZFUGMCJZFRBKF-QXPWYRSVNA-N	C47H74O2	1	M+NH4, M+Na	688.5986, 693.5541		10.55	10.54	35.2151	16.1822	100	100	0.238621	0.0288204	0.171635	0.239606	0.088088	0.985013	0.377383	0.175445	0.765052	-0.100502	0.378811	0.676013	0.140526	0.022049	0.263814
TAG 58:4	TAG	RP_PosMSMS_1455		Y	GL	TG 18:1_18:2_22:1 M+NH4 Atlas --- TG 18:2_18:2_22:0 M+NH4 Atlas	Lipids and lipid-like molecules	Glycerolipids	Triradylcglycerols	HMDB0046641, HMDB0050004	TG(22:0/18:2(9Z,12Z)/18:2(9Z,12Z)) --- TG(18:1(9Z)/18:2(9Z,12Z)/22:1(13Z))	Glycerolipids [GL]	Triradylglycerols [GL03]	Triacylglycerols [GL0301]	LMGL03011042 --- LMGL03011049	TG(18:1(9Z)/18:2(9Z,12Z)/22:1(13Z))[iso6] --- TG(18:2(9Z,12Z)/18:2(9Z,12Z)/22:0)[iso3]	TG 58:4	TG 18:1_18:2_22:1 --- TG 18:2_18:2_22:0	OEWUGNNMLZAOCV-FCWOHNRGNA-N, ZIRJXTDTRZMNMW-KPAPURHWNA-N	C61H110O6	1	M+NH4	956.858		11.57	11.53	49.4624	9.69562	80.916	100	0.246325	0.0290091	0.171635	-0.0513814	0.725263	0.993093	0.281434	0.329294	0.765052	-0.0554068	0.639196	0.785372	0.0820324	0.199969	0.430857
Caffeic acid --- M-toluic Acid --- Phenylacetic acid	Benzenoids --- Phenylpropanoids and polyketides	HILIC_NegMS1_80	RT_1		nonGL	2-Methylbenzoic acid M-H HMDB --- 2-Methylbenzoic acid M-H NIST --- Caffeic acid; LC-ESI-QTOF; MS2; CE M-H-CO2 MassBank --- M-toluic Acid M-H HMDB --- Phenylacetic acid M-H HMDB	Benzenoids --- Phenylpropanoids and polyketides --- NA	Benzene and substituted derivatives --- Cinnamic acids and derivatives --- NA	NA --- Hydroxycinnamic acids and derivatives	HMDB0000209, HMDB0003501, HMDB0062810	Phenylacetic acid --- cis-Caffeic acid --- M-toluic Acid								GPSDUZXPYCFOSQ-UHFFFAOYSA-N, QAIPRVGONGVQAS-RQOWECAXSA-N, WLJVXDMOQOGPHL-UHFFFAOYSA-N, ZWLPBLYKEWSWPD-UHFFFAOYSA-N	C8H8O2, C9H8O4	1	M-H --- M-H-CO2	135.045		1.8	1.83	71.2737	16.1612	98.4962	100	0.244963	0.0291401	0.171635	0.219366	0.129574	0.985013	-0.0460332	0.872919	0.769105	-0.118191	0.314013	0.654154	0.117713	0.0634243	0.336408
TAG 60:3	TAG	RP_PosMSMS_1513		Y	GL	TG 18:1_18:1_24:1 M+NH4 Atlas --- TG 18:1_18:2_24:0 M+NH4 Atlas	Lipids and lipid-like molecules	Glycerolipids	Triradylcglycerols	HMDB0047369	TG(24:0/18:2(9Z,12Z)/18:1(9Z))								MDAOMPFQZJLFBG-MSKHGBNANA-N, QGHHAKZNDRIPKE-ZRDYYRANNA-N	C63H116O6	1	M+NH4	986.904		11.97	11.98	52.1505	14.9617	77.8626	100	0.243072	0.0294094	0.171635	-0.0347075	0.810373	0.993093	0.349276	0.220342	0.765052	-0.0247225	0.832589	0.818513	0.0875729	0.166327	0.408039
Phenol sulphate	Other organic acids and derivatives	HILIC_NegMSMS_209			nonGL	Phenol sulphate M-H HMDB	Organic acids and derivatives	Organic sulfuric acids and derivatives	Arylsulfates	HMDB0060015	Phenol sulphate								CTYRPMDGLDAWRQ-UHFFFAOYSA-N	C6H6O4S	2	M-H	172.992	93.0321	5.93	5.96	100	17.0643	100	100	0.23572	0.0296971	0.171635	0.162962	0.244615	0.985013	0.431917	0.117844	0.765052	0.183113	0.10476	0.513382	0.127499	0.0368776	0.318361
TAG 58:7	TAG	RP_PosMSMS_1443		Y	GL	TG 18:0_18:1_22:6 M+NH4 Atlas --- TG 18:1_18:1_22:5 M+NH4 Atlas	Lipids and lipid-like molecules	Glycerolipids	Triradylcglycerols	HMDB0010468, HMDB0044963	TG(18:1(9Z)/18:1(9Z)/22:5(7Z,10Z,13Z,16Z,19Z)) --- TG(18:0/18:1(9Z)/22:6(4Z,7Z,10Z,13Z,16Z,19Z))	Glycerolipids [GL]	Triradylglycerols [GL03]	Triacylglycerols [GL0301]	LMGL03011305 --- LMGL03011311	TG(18:0/18:1(9Z)/22:6(4Z,7Z,10Z,13Z,16Z,19Z))[iso6] --- TG(18:1(9Z)/18:1(9Z)/22:5(7Z,10Z,13Z,16Z,19Z))[iso3]	TG 58:7	TG 18:0_18:1_22:6 --- TG 18:1_18:1_22:5	GPPIWOJDFFGJMA-GYGDYXAYNA-N, XSJRKDQVEHTWNV-WUYULJGMNA-N	C61H104O6	1	M+NH4	950.81		10.87	10.86	51.8817	9.76689	96.1832	100	0.235949	0.0298377	0.171635	0.0369999	0.792668	0.993093	0.258957	0.35121	0.765052	-0.135989	0.230546	0.62499	0.0947024	0.123613	0.388039
PC O-44:5	PC-O	RP_Neg, RP_PosMSMS_751, 1273		Y	nonGL	PC O-24:1_20:4 M+HCOO Atlas, PC O-44:5 M+H Atlas													AGMNLZKCJUYNCT-SVAIAZDFNA-N, NKGFQIYBEVOJQB-HVVPRZNFNA-N	C52H96NO7P	2	M+HCOO, M+H	922.6907, 878.6955	303.2289, 184.0721	8.42	8.41	67.2043	19.1669	99.2366	100	-0.233087	0.030646	0.174863	-0.0610427	0.662101	0.993093	-0.12708	0.64542	0.765052	-0.0780961	0.488935	0.718416	-0.0919247	0.13223	0.388039
DAG 38:2	DAG	RP_PosMS1_625		Y	GL	Cer 11:0;3O/30:2;(2OH) M+H Atlas --- Cer 12:1;3O/29:1;(2OH) M+H Atlas --- Cer 13:0;3O/28:2;(2OH) M+H Atlas --- Cer 13:1;3O/28:1;(2OH) M+H Atlas --- Cer 14:1;2O/27:1;2O M+H Atlas --- Cer 14:1;3O/27:1;(2OH) M+H Atlas --- Cer 14:2;3O/27:0;(2OH) M+H Atlas --- Cer 15:0;3O/26:2;(2OH) M+H Atlas --- Cer 15:1;2O/26:1;2O M+H Atlas --- Cer 15:1;3O/26:1;(2OH) M+H Atlas --- Cer 15:2;3O/26:0;(2OH) M+H Atlas --…	Lipids and lipid-like molecules	Glycerolipids	Diradylglycerols	HMDB0007117, HMDB0007145, HMDB0007167, HMDB0007224, HMDB0007364	DG(16:0/22:2(13Z,16Z)/0:0) --- DG(16:1(9Z)/22:1(13Z)/0:0) --- DG(18:0/20:2(11Z,14Z)/0:0) --- DG(18:1(9Z)/20:1(11Z)/0:0) --- DG(20:0/18:2(9Z,12Z)/0:0)	Glycerolipids [GL]	Diradylglycerols [GL02]	Diacylglycerols [GL0201]	LMGL02010090 --- LMGL02010091 --- LMGL02010115 --- LMGL02010127 --- LMGL02010330	DG(16:0/22:2(13Z,16Z)/0:0)[iso2] --- DG(16:1(9Z)/22:1(13Z)/0:0)[iso2] --- DG(18:0/20:2(11Z,14Z)/0:0)[iso2] --- DG(18:1(9Z)/20:1(11Z)/0:0)[iso2] --- DG(19:1(9Z)/19:1(9Z)/0:0)	DG 38:2	DG 16:0_22:2 --- DG 16:1_22:1 --- DG 18:0_20:2 --- DG 18:1_20:1 --- DG 19:1_19:1	AGPUTVZLGKJHLP-UHFFFAOYNA-N, AHUUPSOHRXFDTG-YJMJMZFLNA-N, AJUMCQIRLBVMGT-DPTWWRMPNA-N, AKCNIDZVBDSVNW-HWSICPKZNA-N, AMOGDIMUBRLRDH-WRBBJXAJNA-N, BKDJTADMSZSDAV-VRBLFSOXNA-N, BRTWZKUDSRQGQH-LJSPAGPLNA-N, BVTRUJKOHCEYRN-UCVUDZQYNA-N, BYGGQOINNMXNHB-NARCXNHDNA-N, CDLVQQOCVBDTKP-ACHRITRJNA-N, CLAUTKPHPOBHPC-FBAIOFKCNA-N, CPTAECLOXXNGAT-KXYOHKLBNA-N, CPVZWKQBFZXXHO-RWPYRTNZNA-N, CRHJDPOYBZQNJK-UHFFFAO…	C41H76O5	1	M+H --- M+NH4	666.599		7.77	7.7	63.172	19.8747	86.2595	100	0.235048	0.03114	0.17626	0.0647089	0.646883	0.993093	0.350588	0.207831	0.765052	-0.0583308	0.609492	0.779737	0.104294	0.0907746	0.363954
PE O-36:4	PE-O	RP_NegMSMS_362		Y	nonGL	PE O-18:2_18:2 M-H Atlas													CVFFRLVFXKZVIJ-MAZCIEHSNA-N	C41H76NO7P	2	M-H	724.523	303.233	6.34	6.16	32.0755	7.00698	26.7176	100	0.233317	0.0316093	0.177497	0.0328363	0.815404	0.993093	0.139037	0.616948	0.765052	0.113342	0.317775	0.654154	0.087141	0.156553	0.401182
N-Allm	Amino acids, peptides, and analogues	HILIC_NegMS1_864			nonGL	Calpain Inhibitor II M-H NIST	Organic acids and derivatives	Carboxylic acids and derivatives	Amino acids, peptides, and analogues	HMDB0255078	N-Allm								RJWLAIMXRBDUMH-CGZBRXJRSA-N	C19H35N3O4S	1	M-H	400.221		6.35	6.46	45.2575	14.1206	72.9323	100	-0.234618	0.0321519	0.177828	-0.182115	0.197456	0.985013	-0.163124	0.560631	0.765052	-0.17541	0.124033	0.519961	-0.117572	0.0570795	0.336408
PI O-40:5	PI-O	RP_NegMS1_737		Y	nonGL	PI O-14:0_26:5 M-H Atlas --- PI O-14:1_26:4 M-H Atlas --- PI O-16:0_24:5 M-H Atlas --- PI O-16:1_24:4 M-H Atlas --- PI O-16:2_24:3 M-H Atlas --- PI O-16:3_24:2 M-H Atlas --- PI O-16:4_24:1 M-H Atlas --- PI O-18:0_22:5 M-H Atlas --- PI O-18:1_22:4 M-H Atlas --- PI O-18:2_22:3 M-H Atlas --- PI O-18:3_22:2 M-H Atlas --- PI O-18:4_22:1 M-H Atlas --- PI O-18:5_22:0 M-H Atlas --- PI O-20:0_20:5 M-H Atl…						Glycerophospholipids [GP]	Glycerophosphoinositols [GP06]	1-alkyl,2-acylglycerophosphoinositols [GP0602]	LMGP06020065	PI(O-20:0/20:5(5Z,8Z,11Z,14Z,17Z))	PI O-40:5	PI O-20:0/20:5	BFPKCEUUDAEWDG-YVAAATNKNA-N, BJNNXCTZVBNQHG-DYXXURTGNA-N, BUVVYVZSRIHMDE-GWBGNZKTNA-N, DXCZFMLWYCIEEL-OKHYJSPFNA-N, FJYILLOGPNYWDH-DXYSBNJONA-N, FRHSNDYOUCIHLT-LVVKBVPFNA-N, GSJQAPZZADEJEM-REJVNYKHNA-N, IDJFNMVANZHPTO-QGVREHBWNA-N, IEAANMMPSWVLEN-QWBVDZTBNA-N, IPNUUWWRXYNGQV-YYLNKSFANA-N, IPQCWNWCZHEANO-VMADMRDTNA-N, JKMQBRUTIWSAHU-ZIIRTFHXNA-N, KVCZZKMFKQTIMB-GAXXYEEVNA-N, LTODEHCWMCKBEE-XNLOIIF…	C49H87O12P	1	M-H	897.591		5.38	5.39	53.9084	23.6763	93.1298	98.2456	-0.229869	0.0321711	0.177828	-0.161375	0.244168	0.985013	-0.314868	0.250505	0.765052	-0.130698	0.243364	0.627436	-0.119557	0.0481561	0.336408
TAG 44:0	TAG	RP_PosMSMS_918		Y	GL	TG 14:0_14:0_16:0 M+NH4 Atlas	Lipids and lipid-like molecules	Glycerolipids	Triradylcglycerols	HMDB0042063, HMDB0103926	TG(14:0/14:0/16:0) --- TG(16:0/14:0/14:0)	Glycerolipids [GL]	Triradylglycerols [GL03]	Triacylglycerols [GL0301]	LMGL03012756	TG(14:0/14:0/16:0)[iso3]	TG 44:0	TG 14:0_14:0_16:0	AMXRERGJDVUTMF-UHFFFAOYNA-N	C47H90O6	1	M+NH4	768.702		10.36	10.31	86.828	13.264	93.8931	100	0.230883	0.0328448	0.179933	0.140169	0.316128	0.985013	0.324113	0.240645	0.765052	0.109008	0.335034	0.665816	0.11624	0.0568904	0.336408
Val-Thr	Amino acids, peptides, and analogues	HILIC_PosMS1_561			nonGL	Tyr-Val-Arg M+2H NIST --- Val-Thr M+H NIST	Organic acids and derivatives	Carboxylic acids and derivatives	Amino acids, peptides, and analogues	HMDB0029137	Valylthreonine								GVRKWABULJAONN-UHFFFAOYSA-N, MJUTYRIMFIICKL-UHFFFAOYSA-N	C9H18N2O4	1	M+2H --- M+H	219.134		10.43	10.45	52.1622	13.0807	94.7368	100	-0.240255	0.0332758	0.179933	-0.351254	0.01476	0.985013	-0.0861345	0.765717	0.765052	-0.00747593	0.949579	0.835284	-0.148219	0.0193645	0.250915
CAR 7:0	CAR	HILIC_PosMSMS_819		Y	nonGL	CAR 7:0 M Atlas														C14H28NO4	1	M	274.201		2.03	2.02	62.973	16.0249	83.4586	100	0.235405	0.0333147	0.179933	0.0670903	0.63947	0.993093	0.0471361	0.867869	0.769105	0.102637	0.374749	0.676013	0.0898783	0.151393	0.401005
Cytosine	Pyrimidines and pyrimidine derivatives	HILIC_PosMSMS_88	RT_3		nonGL	Cytosine M+H FiehnHILIC --- Cytosine M+H HMDB	Organoheterocyclic compounds	Diazines	Pyrimidines and pyrimidine derivatives	HMDB0000630	Cytosine								OPTASPLRGRRNAP-UHFFFAOYSA-N	C4H5N3O	1	M+H	112.05		11.3	11.49	8.37838	20.7611	13.5338	100	0.233527	0.0343448	0.183129	0.268911	0.0576885	0.985013	0.476139	0.0897775	0.765052	0.118064	0.30579	0.654154	0.149449	0.0157899	0.250915
PE O-36:6	PE-O	RP_NegMSMS_352		Y	nonGL	PE O-16:1_20:5 M-H Atlas													YMKZESHNWGNAIE-VNTVABMMNA-N	C41H72NO7P	2	M-H	720.497	301.215	5.78	5.77	40.7008	8.70548	35.1145	100	0.220789	0.0345177	0.183129	0.180246	0.180803	0.985013	0.284672	0.285885	0.765052	0.115849	0.288202	0.653825	0.118833	0.0434615	0.336408
TAG 56:4	TAG	RP_PosMSMS_1406, 1415		Y	GL	TG 18:1_18:2_20:1 M+NH4 Atlas, TG 18:0_18:1_20:3 M+Na Atlas --- TG 18:1_18:2_20:1 M+Na Atlas	Lipids and lipid-like molecules	Glycerolipids	Triradylcglycerols	HMDB0005460	TG(18:1(9Z)/18:2(9Z,12Z)/20:1(11Z))	Glycerolipids [GL]	Triradylglycerols [GL03]	Triacylglycerols [GL0301]	LMGL03010538	TG(18:1(9Z)/18:2(9Z,12Z)/20:1(11Z))[iso6]	TG 56:4	TG 18:1_18:2_20:1	YONCDTJKIZDSKQ-JALPFGDRNA-N, JRSOEXBBHGXQPU-YMXOETFQNA-N, YONCDTJKIZDSKQ-JALPFGDRNA-N	C59H106O6	1	M+NH4, M+Na	928.8248, 933.7813		11.25	11.18	71.5054	10.8165	96.1832	100	0.23105	0.0349405	0.183129	-0.0239627	0.865891	0.993093	0.232876	0.405741	0.765052	-0.0703992	0.539098	0.746905	0.0800887	0.19716	0.430857
Guanine	Purines and purine derivatives	HILIC_Pos, HILIC_NegMSMS, MS1_274, 128	RT_1		nonGL	Guanine M+H HMDB --- Guanine M+H NIST, Guanine M-H FiehnHILIC --- Guanine M-H HMDB --- Guanine; LC-ESI-ITFT; MS2; m/z M-H MassBank --- Guanine; LC-ESI-QTOF; MS2; CE M-H MassBank	Organoheterocyclic compounds	Imidazopyrimidines	Purines and purine derivatives	HMDB0000132	Guanine								UYTPUPDQBNUYGX-UHFFFAOYSA-N	C5H5N5O	1	M+H, M-H	152.0559, 150.0406		11.12	11.13	82.7027	11.2729	81.9549	100	-0.232295	0.0357513	0.183129	-0.303705	0.0320213	0.985013	-0.620748	0.0265441	0.765052	-0.153173	0.184166	0.589712	-0.162921	0.00847274	0.245949
TAG 52:2	TAG	RP_PosMSMS_1271, 1284		Y	GL	TG 16:0_18:1_18:1 M+NH4 Atlas, TG 16:0_18:1_18:1 M+Na Atlas	Lipids and lipid-like molecules	Glycerolipids	Triradylcglycerols	HMDB0005382	TG(16:0/18:1(9Z)/18:1(9Z))	Glycerolipids [GL]	Triradylglycerols [GL03]	Triacylglycerols [GL0301]	LMGL03010100	TG(16:0/18:1(9Z)/18:1(9Z))[iso3]	TG 52:2	TG 16:0_18:1_18:1	JFISYPWOVQNHLS-LBXGSASVNA-N	C55H102O6	2	M+NH4, M+Na	876.7949, 881.7509	313.2702, 625.5117	11.13	11.08	98.1183	8.99622	99.2366	100	0.228488	0.0358052	0.183129	0.0413472	0.769251	0.993093	0.263899	0.342696	0.765052	-0.096381	0.396944	0.687921	0.093422	0.129346	0.388039
D-myo-Inositol 1,3,4,6-tetrakisphosphate	Alcohols and polyols	HILIC_NegMS1_428			nonGL	D-myo-Inositol-1,3,4,6-tetraphosphate M-2H NIST --- D-myo-Inositol-2,3,5,6-tetraphosphate M-2H NIST	Organic oxygen compounds	Organooxygen compounds	Alcohols and polyols	HMDB0001187	D-myo-Inositol 1,3,4,6-tetrakisphosphate								ZAWIXNGTTZTBKV-UHFFFAOYSA-N, ZAWIXNGTTZTBKV-VLFADPLGSA-N	C6H16O18P4	1	M-2H	248.96		12.95	12.94	100	12.1277	100	100	-0.237394	0.0361455	0.183129	-0.290489	0.0455405	0.985013	-0.608061	0.0340508	0.765052	0.142681	0.227411	0.622717	-0.161358	0.0109864	0.245949
ST 24:1;O5;G;S	ST - Steroid conjugates	HILIC_NegMS1_1145		Y	nonGL	ST 24:1;O5;G;S M-H Atlas	Lipids and lipid-like molecules	Steroids and steroid derivatives	Bile acids, alcohols and derivatives	HMDB0240728	Glycocholic acid 3-sulfate								ZXUWKFXQTSOVDY-FRVQLJSFSA-N	C26H43NO9S	1	M-H	544.26		9.1	9.11	28.9973	20.3764	47.3684	99.1228	-0.238592	0.0362377	0.183129	-0.197642	0.178422	0.985013	-0.319447	0.272083	0.765052	0.132835	0.264	0.640907	-0.129551	0.043537	0.336408
PE O-37:5	PE-O	RP_Pos, RP_NegMSMS_824, 381		Y	nonGL	PE O-17:1_20:4 M+H Atlas, PE O-17:1_20:4 M-H Atlas													ZTNZTGXTHOFZGC-LNFNTRPGNA-N	C42H76NO7P	1, 2	M+H, M-H	738.5394, 736.5289	303.229	6.465	6.42	42.0485	10.5624	55.7252	100	0.221335	0.0364362	0.183129	0.0839281	0.5398	0.985013	0.157814	0.559895	0.765052	0.102245	0.355006	0.671205	0.0941387	0.115679	0.382475
HexCer 34:2;O2	HexCer	RP_PosMSMS_703		Y	nonGL	HexCer 18:1;2O/16:1 M+H Atlas													YRNLHUQENKOSRP-WGSUTADTNA-N	C40H75NO8	1	M+H	698.553		5.57	5.52	53.4946	22.419	70.9924	100	0.234467	0.0364914	0.183129	0.113241	0.43471	0.985013	0.302368	0.290876	0.765052	-0.042215	0.719047	0.799097	0.111101	0.0792944	0.363249
PC 29:0	PC	RP_PosMSMS_687		Y	nonGL	PC 14:0_15:0 M+H Atlas	Lipids and lipid-like molecules	Glycerophospholipids	Glycerophosphocholines	HMDB0007868	PC(14:0/15:0)	Glycerophospholipids [GP]	Glycerophosphocholines [GP01]	Diacylglycerophosphocholines [GP0101]	LMGP01010479	PC(14:0/15:0)	PC 29:0	PC 14:0_15:0	JERIBPHBOOFETI-UHFFFAOYNA-N	C37H74NO8P	1	M+H	692.526		5.3	5.36	60.2151	17.2362	98.4733	100	0.233244	0.0365831	0.183129	0.212618	0.139005	0.985013	0.157012	0.582357	0.765052	0.170432	0.142468	0.542199	0.122725	0.0510362	0.336408
FA 16:0	FA - Fatty Acids and Conjugates	HILIC_Pos, HILIC_NegMSMS, MS1_728, 449		Y	nonGL	Pentadecanoic acid, 14-methyl- M+H NIST, Palmitic acid M-H HMDB	Lipids and lipid-like molecules	Fatty Acyls	Fatty acids and conjugates	HMDB0031068, HMDB0000220	Palmitic acid --- Isopalmitic acid	Fatty Acyls [FA]	Fatty Acids and Conjugates [FA01]	Methyl branched fatty acids [FA0102], Straight chain fatty acids [FA0101]	LMFA01020010, LMFA01010001	Isopalmitic acid, Palmitic acid	FA 16:0		ZONJATNKKGGVSU-UHFFFAOYSA-N, IPCSVZSSVZVIGE-UHFFFAOYSA-N	C16H32O2	1	M+H, M-H	257.2471, 255.233		1.29	1.29	100	6.5322	100	100	-0.23306	0.0367536	0.183129	-0.327153	0.0218003	0.985013	-0.341882	0.229838	0.765052	0.0532667	0.648307	0.785372	-0.153918	0.0138703	0.250915
TAG 47:1	TAG	RP_PosMSMS_1048		Y	GL	TG 11:0_18:0_18:1 M+NH4 Atlas --- TG 13:0_16:0_18:1 M+NH4 Atlas --- TG 14:0_15:0_18:1 M+NH4 Atlas --- TG 14:0_16:0_17:1 M+NH4 Atlas --- TG 15:0_16:0_16:1 M+NH4 Atlas	Lipids and lipid-like molecules	Glycerolipids	Triradylcglycerols	HMDB0042101, HMDB0043025	TG(14:0/15:0/18:1(9Z)) --- TG(15:0/16:0/16:1(9Z))	Glycerolipids [GL]	Triradylglycerols [GL03]	Triacylglycerols [GL0301]	LMGL03013791 --- LMGL03014173 --- LMGL03014223 --- LMGL03015005	TG(13:0/16:0/18:1(9Z))[iso6] --- TG(14:0/15:0/18:1(9Z))[iso6] --- TG(14:0/16:0/17:1(9Z))[iso6] --- TG(15:0/16:0/16:1(9Z))[iso6]	TG 47:1	TG 13:0_16:0_18:1 --- TG 14:0_15:0_18:1 --- TG 14:0_16:0_17:1 --- TG 15:0_16:0_16:1	ALRNRVFCWUBQCR-IZHYLOQSNA-N, CNTLLRZLLQNETA-BZZOAKBMNA-N, LPFCBOFEKLNOFO-IZHYLOQSNA-N, PGYNJJCWPCAGLG-GYHWCHFENA-N, RCYIETYFTUBXFK-QOCHGBHMNA-N	C50H94O6	2	M+NH4	808.733	535.472	10.58	10.54	95.1613	20.7363	97.7099	100	0.233881	0.0382802	0.187192	0.0553483	0.704828	0.993093	0.231871	0.421632	0.765052	0.066783	0.571693	0.764707	0.0962528	0.13179	0.388039
TAG 54:5	TAG	RP_PosMSMS_1330, 1341		Y	GL	TG 18:1_18:2_18:2 M+NH4 Atlas, TG 16:0_18:1_20:4 M+Na Atlas --- TG 18:1_18:2_18:2 M+Na Atlas	Lipids and lipid-like molecules	Glycerolipids	Triradylcglycerols	HMDB0005461, HMDB0031115, HMDB0044132	TG(18:1(9Z)/18:2(9Z,12Z)/18:2(9Z,12Z)) --- Glycerol 1,2-di-(9Z,12Z-octadecadienoate) 3-(9Z-octadecenoate) --- TG(16:0/18:1(9Z)/20:4(8Z,11Z,14Z,17Z))	Glycerolipids [GL]	Triradylglycerols [GL03]	Triacylglycerols [GL0301]	LMGL03010327	TG(18:1(9Z)/18:2(9Z,12Z)/18:2(9Z,12Z))[iso3]	TG 54:5	TG 18:1_18:2_18:2	VVEBTVMJPTZDHO-WECKWCTPNA-N, VVEBTVMJPTZDHO-WECKWCTPNA-N, WNGNQJVTTOEUDY-ATPZPQLVNA-N	C57H100O6	1	M+NH4, M+Na	898.7797, 903.7349		10.68	10.66	93.8172	7.73702	98.4733	100	0.235284	0.038489	0.187192	-0.0587364	0.689748	0.993093	0.250689	0.388172	0.765052	-0.113349	0.339783	0.667478	0.0755947	0.240919	0.443666
L-Histidine	Amino acids, peptides, and analogues	HILIC_Pos, HILIC_NegMSMS_297, 145			nonGL	Histidine M+H FiehnHILIC --- L-Histidine M+H HMDB --- L-Histidine M+H NIST, L-Histidine M-H HMDB --- L-Histidine M-H NIST	Organic acids and derivatives	Carboxylic acids and derivatives	Amino acids, peptides, and analogues	HMDB0000177	L-Histidine								HNDVDQJCIGZPNO-UHFFFAOYNA-N, HNDVDQJCIGZPNO-YFKPBYRVSA-N, HNDVDQJCIGZPNO-YFKPBYRVSA-N	C6H9N3O2	1	M+H, M-H	156.0763, 154.062		16.34	16.34	100	7.41973	100	100	-0.233117	0.0386372	0.187192	-0.202505	0.163229	0.985013	-0.689734	0.0152877	0.765052	0.0957488	0.416362	0.693869	-0.147045	0.0201334	0.250915
Gly-His-Lys	Amino acids, peptides, and analogues	RP_PosMS1_81			nonGL	(-)-1,2:5,6-Di-O-cyclohexylidene-L-inositol M+H NIST --- Gly-His-Lys M+H NIST --- His-Gly-Lys M+H NIST --- Pentamidine M+H HMDB --- Pentamidine; LC-ESI-QTOF; MS2; [M+H]+; CE M+H MassBank --- Poldine; LC-ESI-QTOF; MS2; CE M+H MassBank	Benzenoids --- Organic acids and derivatives	Phenol ethers --- Carboxylic acids and derivatives	NA --- Amino acids, peptides, and analogues	HMDB0014876, HMDB0252882	Pentamidine --- Glycyl-l-histidyl-l-lysine								CQRKVVAGMJJJSR-UHFFFAOYNA-N, MVORZMQFXBLMHM-UHFFFAOYSA-N, NQKRILCJYCASDV-UHFFFAOYSA-N, PHAPESVEHHOBEI-KPRKPIBOSA-N, XDRYMKDFEDOLFX-UHFFFAOYSA-N	C14H24N6O4, C19H24N4O2	1	M+H	341.195		1.17	1.18	56.1828	19.2201	90.8397	100	-0.233987	0.0386902	0.187192	-0.179454	0.218948	0.985013	-0.0776989	0.788533	0.766659	0.0615546	0.603129	0.779737	-0.112638	0.0779196	0.363249
Phosphatidylserine 18	Other lipids	HILIC_NegMS1_1389		Y	nonGL	Phosphatidylserine 18 M-H MassBank													CWSHAMZVMDYRSO-GCUVURNUNA-N	C42H78NO10P, C42H80NO10P, C44H76NO10P, C44H78NO10P, C44H80NO10P, C44H82NO10P, C44H84NO10P, C45H76NO9P, C46H76NO10P, C46H78NO10P, C46H80NO10P, C46H82NO10P, C46H88NO10P	1	M-H	816.572		6.58	6.6	13.8211	13.7137	38.3459	100	0.232509	0.0388919	0.187192	0.0317977	0.827284	0.993093	-0.0372337	0.8972	0.769105	-0.145799	0.214239	0.614668	0.0779776	0.221716	0.443666
TAG 51:3	TAG	RP_PosMSMS_1217		Y	GL	TG 15:0_18:1_18:2 M+NH4 Atlas	Lipids and lipid-like molecules	Glycerolipids	Triradylcglycerols	HMDB0011708	TG(15:0/18:1(9Z)/18:2(9Z,12Z))	Glycerolipids [GL]	Triradylglycerols [GL03]	Triacylglycerols [GL0301]	LMGL03015146	TG(15:0/18:1(9Z)/18:2(9Z,12Z))[iso6]	TG 51:3	TG 15:0_18:1_18:2	AFUGNQFGFOCTMS-FBSASISJNA-N	C54H98O6	1	M+NH4	860.764		10.69	10.66	89.7849	6.91879	98.4733	100	0.22982	0.0398171	0.189832	0.00921318	0.949243	0.998614	0.1321	0.644194	0.765052	-0.0738158	0.527764	0.737485	0.0811281	0.200266	0.430857
PI 34:1	PI	RP_Pos, RP_NegMSMS_1212, 643		Y	nonGL	PI 34:1 M+Na Atlas, 1-Hexadecanoyl-2-(9Z-octadecenoyl)-sn-glycero-3-phospho-(1'-myo-inositol) M-H NIST	Lipids and lipid-like molecules	Glycerophospholipids	Glycerophosphoinositols	HMDB0009783	PI(16:0/18:1(9Z))								IRBFVYAOJSGZPV-NXVVXOECNA-N, PDLAMJKMOKWLAJ-AGORXRROSA-N	C43H81O13P	1, 2	M+Na, M-H	859.5272, 835.5346	391.223	5.315	5.29	67.2043	22.4964	100	100	0.234344	0.0401721	0.189832	0.194973	0.185295	0.985013	0.229325	0.432043	0.765052	0.228232	0.0539539	0.442848	0.123238	0.055572	0.336408
TAG 49:2	TAG	RP_PosMSMS_1133, 1150		Y	GL	TG 14:0_17:0_18:2 M+NH4 Atlas --- TG 15:0_16:1_18:1 M+NH4 Atlas --- TG 15:1_16:0_18:1 M+NH4 Atlas --- TG 16:0_16:1_17:1 M+NH4 Atlas, TG 15:0_15:0_19:2 M+Na Atlas --- TG 15:0_16:1_18:1 M+Na Atlas --- TG 16:0_16:0_17:2 M+Na Atlas	Lipids and lipid-like molecules	Glycerolipids	Triradylcglycerols	HMDB0043201	TG(15:0/16:1(9Z)/18:1(9Z))	Glycerolipids [GL]	Triradylglycerols [GL03]	Triacylglycerols [GL0301]	LMGL03010025 --- LMGL03014276 --- LMGL03015035 --- LMGL03015361, LMGL03010026 --- LMGL03015035	TG(14:0/17:0/18:2(9Z,12Z))[iso6] --- TG(15:0/16:1(9Z)/18:1(9Z))[iso6] --- TG(15:1(9Z)/16:0/18:1(9Z))[iso6] --- TG(16:0/16:1(9Z)/17:1(9Z))[iso6], TG(15:0/16:1(9Z)/18:1(9Z))[iso6] --- TG(16:0/16:0/17:2(9Z,12Z))[iso3]	TG 49:2	TG 14:0_17:0_18:2 --- TG 15:0_16:1_18:1 --- TG 15:1_16:0_18:1 --- TG 16:0_16:1_17:1, TG 15:0_16:1_18:1 --- TG 16:0_16:0_17:2	GDEPXLBAYBPEBZ-XTJQTONKNA-N, PTMMGTLFYOOVNO-LLMCKSEUNA-N, UNLQNCABWOVYJJ-NUJSLWOLNA-N, ZSHVDBVWHRXKEV-UOBUJMOANA-N, JYOMNDSJWZRTQE-XQUUTTIXNA-N, MZJULUYNWGJAQD-BSIAVTDWNA-N, ZSHVDBVWHRXKEV-UOBUJMOANA-N	C52H96O6	1	M+NH4, M+Na	834.7487, 839.7048		10.64	10.6	97.043	9.86595	100	100	0.228781	0.0402452	0.189832	0.0977368	0.497955	0.985013	0.211678	0.457793	0.765052	0.0487606	0.676037	0.785957	0.101825	0.106232	0.372645
TAG 59:8	TAG	RP_PosMS1_1466		Y	GL	TG 10:0_11:0_38:8 M+NH4 Atlas --- TG 10:0_13:0_36:8 M+NH4 Atlas --- TG 10:0_13:1_36:7 M+NH4 Atlas --- TG 10:0_15:0_34:8 M+NH4 Atlas --- TG 10:0_15:1_34:7 M+NH4 Atlas --- TG 10:0_17:0_32:8 M+NH4 Atlas --- TG 10:0_17:1_32:7 M+NH4 Atlas --- TG 10:0_17:2_32:6 M+NH4 Atlas --- TG 10:0_19:0_30:8 M+NH4 Atlas --- TG 10:0_19:1_30:7 M+NH4 Atlas --- TG 10:0_19:2_30:6 M+NH4 Atlas --- TG 10:0_21:1_28:7 M+NH4 A…	Lipids and lipid-like molecules	Glycerolipids	Triradylcglycerols	HMDB0043567	TG(15:0/22:2(13Z,16Z)/22:6(4Z,7Z,10Z,13Z,16Z,19Z))	Glycerolipids [GL]	Triradylglycerols [GL03]	Triacylglycerols [GL0301]	LMGL03011429 --- LMGL03011495 --- LMGL03011532 --- LMGL03011533 --- LMGL03011539 --- LMGL03011540 --- LMGL03011541 --- LMGL03011588 --- LMGL03011629 --- LMGL03011686 --- LMGL03011694 --- LMGL03015349 --- LMGL03015351 --- LMGL03015699 --- LMGL03016273 --- LMGL03016339 --- LMGL03016579 --- LMGL03016729	TG(15:0/22:2(13Z,16Z)/22:6(4Z,7Z,10Z,13Z,16Z,19Z))[iso6] --- TG(15:0/22:3(10Z,13Z,16Z)/22:5(7Z,10Z,13Z,16Z,19Z))[iso6] --- TG(15:1(9Z)/22:2(13Z,16Z)/22:5(7Z,10Z,13Z,16Z,19Z))[iso6] --- TG(17:0/20:2(11Z,14Z)/22:6(4Z,7Z,10Z,13Z,16Z,19Z))[iso6] --- TG(17:0/20:5(5Z,8Z,11Z,14Z,17Z)/22:3(10Z,13Z,16Z))[iso6] --- TG(17:1(9Z)/20:1(11Z)/22:6(4Z,7Z,10Z,13Z,16Z,19Z))[iso6] --- TG(17:1(9Z)/20:2(11Z,14Z)/22:5(…	TG 59:8	TG 15:0_22:2_22:6 --- TG 15:0_22:3_22:5 --- TG 15:1_22:2_22:5 --- TG 17:0_20:2_22:6 --- TG 17:0_20:5_22:3 --- TG 17:1_20:1_22:6 --- TG 17:1_20:2_22:5 --- TG 17:1_20:5_22:2 --- TG 17:2_20:0_22:6 --- TG 17:2_20:1_22:5 --- TG 17:2_20:5_22:1 --- TG 18:1_19:1_22:6 --- TG 18:2_19:0_22:6 --- TG 18:2_19:1_22:5 --- TG 18:3_19:0_22:5 --- TG 18:3_20:5_21:0 --- TG 18:4_19:1_22:3 --- TG 19:1_20:2_20:5	AEELDPMRADELIH-PFNHKVEQNA-N, AFHBGSGQFFFURP-KTJJLZDQNA-N, AFIWMMSQVGMVEV-VLCCJKMUNA-N, AFMRLJGWCDXNNC-KNTBPWTJNA-N, AHGNNSGFOJPNRQ-QBGLOVRRNA-N, AJEUYLBUCQRMPN-AQMJPTKHNA-N, AKZQDKRHDVAYKK-JVRNSECENA-N, ALLBAZDQPHKBFH-ZERKZXFBNA-N, AOBBJLILFAHBBR-KIMDHDNLNA-N, ASFXENQYLWTDSY-YHYFMMNGNA-N, AVOFIQXLCNOMQJ-AEGNTQFJNA-N, AYTKPAIVVJIWEZ-IQQSWGIBNA-N, BACQMVWFDBMHAG-SMTVNIRVNA-N, BANBYWDZERTPSD-PGFNWPO…	C62H104O6	1	M+NH4	962.817		11.59	11.53	67.7419	6.5886	100	100	0.22947	0.040633	0.190391	-0.0326883	0.821729	0.993093	0.315914	0.269361	0.765052	-0.0687786	0.557341	0.754389	0.0820048	0.196525	0.430857
TAG 61:9	TAG	RP_PosMS1_1516		Y	GL	TG 10:0_13:0_38:9 M+NH4 Atlas --- TG 10:0_13:1_38:8 M+NH4 Atlas --- TG 10:0_15:0_36:9 M+NH4 Atlas --- TG 10:0_15:1_36:8 M+NH4 Atlas --- TG 10:0_17:0_34:9 M+NH4 Atlas --- TG 10:0_17:1_34:8 M+NH4 Atlas --- TG 10:0_17:2_34:7 M+NH4 Atlas --- TG 10:0_19:0_32:9 M+NH4 Atlas --- TG 10:0_19:1_32:8 M+NH4 Atlas --- TG 10:0_19:2_32:7 M+NH4 Atlas --- TG 10:0_21:1_30:8 M+NH4 Atlas --- TG 10:0_21:2_30:7 M+NH4 A…						Glycerolipids [GL]	Triradylglycerols [GL03]	Triacylglycerols [GL0301]	LMGL03012018 --- LMGL03012029 --- LMGL03012090 --- LMGL03012133 --- LMGL03012145 --- LMGL03012201 --- LMGL03016651 --- LMGL03016737 --- LMGL03016761	TG(17:0/22:3(10Z,13Z,16Z)/22:6(4Z,7Z,10Z,13Z,16Z,19Z))[iso6] --- TG(17:1(9Z)/22:2(13Z,16Z)/22:6(4Z,7Z,10Z,13Z,16Z,19Z))[iso6] --- TG(17:1(9Z)/22:3(10Z,13Z,16Z)/22:5(7Z,10Z,13Z,16Z,19Z))[iso6] --- TG(17:2(9Z,12Z)/22:1(13Z)/22:6(4Z,7Z,10Z,13Z,16Z,19Z))[iso6] --- TG(17:2(9Z,12Z)/22:2(13Z,16Z)/22:5(7Z,10Z,13Z,16Z,19Z))[iso6] --- TG(18:3(9Z,12Z,15Z)/21:0/22:6(4Z,7Z,10Z,13Z,16Z,19Z))[iso6] --- TG(18:4(…	TG 61:9	TG 17:0_22:3_22:6 --- TG 17:1_22:2_22:6 --- TG 17:1_22:3_22:5 --- TG 17:2_22:1_22:6 --- TG 17:2_22:2_22:5 --- TG 18:3_21:0_22:6 --- TG 18:4_21:0_22:5 --- TG 19:1_20:2_22:6 --- TG 19:1_20:5_22:3	AGSKZINPJMAKAS-FYXDUGRVNA-N, ALYXLDVDMUPJEH-JMPUTPBVNA-N, AOBXOWRGRJMQCI-GWECHVTQNA-N, AQAQVEBFOBNRGO-WIKVDMHHNA-N, AQEYVMJVPDMMJE-NIYMVRGGNA-N, AQQGEBJVZUZMGC-MFPNKTHENA-N, ASZOPKMLYVKBJI-MYPRJFBGNA-N, AUDCMVADWBFISP-IRPXPMHYNA-N, AUEJFEHUCZDIAZ-ZXZFUZJPNA-N, AUPVSWOABGSTIN-VIVBPVQWNA-N, AXKLQUBZURXAIT-NWVCPNKRNA-N, AXRFGFKJFGQNAX-YIKBCVFJNA-N, BIWGGTNGHUPWSO-ACKBTQBGNA-N, BIZRRUIDNGLURQ-IQDBCUB…	C64H106O6	1	M+NH4	988.832		11.66	11.6	60.2151	12.729	86.2595	100	0.226443	0.0411819	0.190773	0.00443113	0.975376	0.998614	0.116251	0.682022	0.765052	-0.0644225	0.578589	0.768873	0.0783517	0.212471	0.439107
TAG 56:5	TAG	RP_PosMSMS_1402, 1411		Y	GL	TG 16:0_18:1_22:4 M+NH4 Atlas --- TG 18:0_18:1_20:4 M+NH4 Atlas --- TG 18:1_18:1_20:3 M+NH4 Atlas, TG 16:0_18:1_22:4 M+Na Atlas --- TG 18:0_18:1_20:4 M+Na Atlas --- TG 18:1_18:1_20:3 M+Na Atlas	Lipids and lipid-like molecules	Glycerolipids	Triradylcglycerols	HMDB0044960	TG(18:0/18:1(9Z)/20:4(8Z,11Z,14Z,17Z))								JBEUJGOFEJACBK-ZAUBOASJNA-N, NMOSKFDAUMPINK-JBKRRXNUNA-N, XSHMZQHXHKCIMM-ZDJKFXHENA-N	C59H104O6	1	M+NH4, M+Na	926.8104, 931.7656		11.025	11.02	82.7957	7.55368	97.7099	100	0.219902	0.0414689	0.190773	0.0345954	0.804254	0.993093	0.248391	0.367238	0.765052	-0.140103	0.212743	0.614668	0.0886314	0.146408	0.400433
Arachidonyl dopamine	Benzenoids	HILIC_NegMS1_958			nonGL	Arachidonyl dopamine M-H FiehnHILIC	Benzenoids	Phenols	Benzenediols	HMDB0243624	N-[2-(3,4-Dihydroxyphenyl)ethyl]icosa-5,8,11,14-tetraenamide								MVVPIAAVGAWJNQ-UHFFFAOYSA-N	C28H41NO3	1	M-H	438.305		1.6	1.62	22.2222	25.4314	53.3835	100	-0.230959	0.0415232	0.190773	-0.111554	0.44623	0.985013	-0.105643	0.715553	0.765052	0.225308	0.0551614	0.442848	-0.0999462	0.118712	0.382475
TAG 54:4	TAG	RP_PosMSMS_1335, 1346		Y	GL	TG 18:1_18:1_18:2 M+NH4 Atlas, TG 18:1_18:1_18:2 M+Na Atlas	Lipids and lipid-like molecules	Glycerolipids	Triradylcglycerols	HMDB0005455	TG(18:1(9Z)/18:1(9Z)/18:2(9Z,12Z))	Glycerolipids [GL]	Triradylglycerols [GL03]	Triacylglycerols [GL0301]	LMGL03010288	TG(18:1(9Z)/18:1(9Z)/18:2(9Z,12Z))[iso3]	TG 54:4	TG 18:1_18:1_18:2	JTMWOTXEVWLTTO-KTKRTRQNNA-N	C57H102O6	1	M+NH4, M+Na	900.7952, 905.7507		10.91	10.875	95.4301	6.34321	99.2366	100	0.228935	0.0421724	0.192481	-0.0443586	0.760938	0.993093	0.354496	0.217169	0.765052	-0.18658	0.111271	0.513486	0.0814871	0.201694	0.431003
Coproporphyrin III	Organoheterocyclic compounds	HILIC_PosMS1_1107			nonGL	Coproporphyrin III M+2H NIST	Organoheterocyclic compounds	Tetrapyrroles and derivatives	Porphyrins	HMDB0000570	Coproporphyrin III								JWFCYWSMNRLXLX-UJJXFSCMSA-N	C36H38N4O8	1	M+2H	328.139		12.08	12.08	56.7568	28.5774	67.6692	100	0.225457	0.0424391	0.192481	0.17756	0.215136	0.985013	0.469029	0.0967064	0.765052	0.181231	0.116782	0.517286	0.128899	0.0392434	0.322458
Hypotaurine	Other organic acids and derivatives	HILIC_PosMS1_556			nonGL	Diphenyl sulfone M+H HMDB --- Hypotaurine 2M+H NIST	Benzenoids	Benzene and substituted derivatives	Benzenesulfonyl compounds	HMDB0251453	Diphenyl sulfone								KZTYYGOKRVBIMI-UHFFFAOYSA-N, VVIUBCNYACGLLV-UHFFFAOYSA-N	C12H10O2S, C2H7NO2S	1	2M+H --- M+H	219.044		7.86	7.89	19.1892	21.8384	52.6316	97.3684	-0.226776	0.042862	0.193161	-0.07961	0.58251	0.993093	-0.375084	0.188654	0.765052	0.255385	0.0273729	0.397529	-0.105761	0.0944731	0.363954
TAG 48:2	TAG	RP_PosMSMS_1090		Y	GL	TG 14:0_16:1_18:1 M+NH4 Atlas	Lipids and lipid-like molecules	Glycerolipids	Triradylcglycerols	HMDB0042311	TG(14:0/16:1(9Z)/18:1(9Z))	Glycerolipids [GL]	Triradylglycerols [GL03]	Triacylglycerols [GL0301]	LMGL03014251	TG(14:0/16:1(9Z)/18:1(9Z))[iso6]	TG 48:2	TG 14:0_16:1_18:1	QABWZGMVIDDGGI-WYERXJFXNA-N	C51H94O6	1	M+NH4	820.733		10.46	10.41	99.4624	8.95774	100	100	0.225964	0.0437679	0.195994	0.05209	0.719369	0.993093	0.216837	0.44889	0.765052	0.0289484	0.804969	0.81381	0.0923721	0.145073	0.400083
DAG 38:5	DAG	RP_PosMSMS_608		Y	GL	Cer 19:3;3O/22:2;(2OH) M+H Atlas --- Cer 21:3;3O/20:2;(2OH) M+H Atlas --- Cer 23:3;3O/18:2;(2OH) M+H Atlas --- Cer 25:3;3O/16:2;(2OH) M+H Atlas --- DG 10:0_28:5 M+NH4 Atlas --- DG 12:0_26:5 M+NH4 Atlas --- DG 14:0_24:5 M+NH4 Atlas --- DG 14:1_24:4 M+NH4 Atlas --- DG 16:0_22:5 M+NH4 Atlas --- DG 16:1_22:4 M+NH4 Atlas --- DG 16:2_22:3 M+NH4 Atlas --- DG 18:0_20:5 M+NH4 Atlas --- DG 18:1_20:4 M+NH4 …	Lipids and lipid-like molecules	Glycerolipids	Diradylglycerols	HMDB0007120, HMDB0007172, HMDB0007229, HMDB0007396, HMDB0007424	DG(16:0/22:5(7Z,10Z,13Z,16Z,19Z)/0:0) --- DG(18:0/20:5(5Z,8Z,11Z,14Z,17Z)/0:0) --- DG(18:1(9Z)/20:4(8Z,11Z,14Z,17Z)/0:0) --- DG(20:1(11Z)/18:4(6Z,9Z,12Z,15Z)/0:0) --- DG(20:2(11Z,14Z)/18:3(9Z,12Z,15Z)/0:0)	Glycerolipids [GL]	Diradylglycerols [GL02]	Diacylglycerols [GL0201]	LMGL02010122 --- LMGL02010150	DG(16:0/22:5(7Z,10Z,13Z,16Z,19Z)/0:0)[iso2] --- DG(18:0/20:5(5Z,8Z,11Z,14Z,17Z)/0:0)[iso2]	DG 38:5	DG 16:0_22:5 --- DG 18:0_20:5	AJVICDHCQZBZMM-VYARSWGKNA-N, AOLSGZQTHJEDCU-GJCLIZKUNA-N, APADBBPHEBAYDR-UHFFFAOYNA-N, BFTRDKMVYCWZJQ-QXMHVHEDNA-N, BMUGHRFHPAIWJQ-XDNZRWFZNA-N, BRVPDMGQWTUWHG-SWWMJBKRNA-N, BVNOYERWUZNRKD-XFFFEZQMNA-N, BWBIUDHQOIQHSO-WUZLTRMFNA-N, CDIDDLXSXXDECX-HAGCXRLMNA-N, DLLGDCTZGSZLQG-YOJOTYGRNA-N, DYJAOUONXLPPDD-OTDIMJFWNA-N, FLKYYISDTBTDLP-UHFFFAOYNA-N, GBSAELJSWLWUBU-UHFFFAOYNA-N, GRIYZLPCRMCEIJ-LEIQGVM…	C41H70O5	1	M+H --- M+NH4	660.552		7.23	7.13	41.6667	17.5771	47.3282	100	0.212192	0.0454299	0.202158	-0.00911453	0.947044	0.998614	0.147155	0.587322	0.765052	0.0133475	0.904244	0.832797	0.0727467	0.225992	0.443666
L-Glutamic acid	Amino acids, peptides, and analogues	HILIC_Pos, HILIC_NegMSMS_249, 111			nonGL	DL-Glutamate M+H HMDB --- L-Glutamic acid M+H HMDB --- L-Glutamic acid M+H NIST, L-Glutamic acid M-H HMDB --- L-Glutamic acid M-H NIST	Organic acids and derivatives	Carboxylic acids and derivatives	Amino acids, peptides, and analogues	HMDB0000148, HMDB0060475	L-Glutamic acid --- DL-Glutamate								WHUUTDBJXJRKMK-UHFFFAOYSA-N, WHUUTDBJXJRKMK-VKHMYHEASA-N	C5H9NO4	1, 2	M+H, M-H	148.0604, 146.0459	102.053	14.765	14.745	56.9106	22.9905	81.203	100	0.221546	0.0463438	0.204936	0.177675	0.21507	0.985013	0.514283	0.0683101	0.765052	0.0330193	0.776475	0.807526	0.129917	0.037783	0.320417
Phosphatidylcholine lyso 18	Other lipids	HILIC_NegMS1_1158		Y	nonGL	Phosphatidylcholine lyso 18 M+CH3COO MassBank													WZSWWJLIQCVBRG-ZCXUNETKNA-N	C26H48NO7P, C26H50NO7P, C26H52NO7P, C26H54NO7P	1	M+CH3COO	552.363		8.11	8.12	17.8862	22.1213	42.8571	100	-0.219813	0.0470269	0.205179	-0.0985303	0.490839	0.985013	-0.589242	0.0353331	0.765052	-0.0797082	0.490603	0.718786	-0.117786	0.0589212	0.336408
3-Methoxytyrosine	Amino acids, peptides, and analogues	HILIC_NegMS1_311			nonGL	3-Methoxytyrosine M-H HMDB --- Milrinone M-H FiehnHILIC --- Milrinone M-H HMDB	Organic acids and derivatives	Carboxylic acids and derivatives	Amino acids, peptides, and analogues	HMDB0001434	3-Methoxytyrosine								PFDUUKDQEHURQC-UHFFFAOYSA-N, PZRHRDRVRGEVNW-UHFFFAOYSA-N	C10H13NO4, C12H9N3O	1	M-H	210.07		8.97	8.98	33.8753	13.3136	93.985	100	-0.209017	0.0470685	0.205179	-0.127491	0.348083	0.985013	-0.479295	0.0727344	0.765052	-0.129659	0.237295	0.627436	-0.114528	0.0533818	0.336408
3-Hydroxyanthranilic acid	Benzenoids	HILIC_NegMS1_141			nonGL	2-Nitro-p-cresol M-H HMDB --- 3-Hydroxyanthranilic acid M-H FiehnHILIC --- 3-Hydroxyanthranilic acid M-H HMDB --- 5-Aminosalicylic acid M-H NIST --- 5-Aminosalicylic??acid M-H FiehnHILIC --- Mesalazine M-H HMDB --- Salicylhydroxamic acid M-H HMDB	Benzenoids	Benzene and substituted derivatives	Benzoic acids and derivatives	HMDB0001476	3-Hydroxyanthranilic acid								HBROZNQEVUILML-UHFFFAOYSA-N, KBOPZPXVLCULAV-UHFFFAOYSA-N, SYDNSSSQVSOXTN-UHFFFAOYSA-N, WJXSWCUQABXPFS-UHFFFAOYSA-N	C7H7NO3	1	M-H	152.038		11.1	11.07	50.9485	14.7112	100	100	-0.226523	0.0472688	0.205179	0.0530561	0.719365	0.993093	-0.364662	0.210028	0.765052	0.245478	0.0377277	0.419009	-0.0795453	0.218658	0.443666
DAG 39:4	DAG	RP_PosMS1_655		Y	GL	Cer 14:1;2O/28:3;2O M+H Atlas --- Cer 14:2;3O/28:2;(2OH) M+H Atlas --- Cer 15:1;2O/27:3;2O M+H Atlas --- Cer 16:1;2O/26:3;2O M+H Atlas --- Cer 16:2;3O/26:2;(2OH) M+H Atlas --- Cer 18:2;3O/24:2;(2OH) M+H Atlas --- Cer 18:3;3O/24:1;(2OH) M+H Atlas --- Cer 19:3;3O/23:1;(2OH) M+H Atlas --- Cer 20:2;3O/22:2;(2OH) M+H Atlas --- Cer 20:3;3O/22:1;(2OH) M+H Atlas --- Cer 21:3;3O/21:1;(2OH) M+H Atlas --- C…						Glycerolipids [GL]	Diradylglycerols [GL02]	Diacylglycerols [GL0201]	LMGL02010147 --- LMGL02010171	DG(17:1(9Z)/22:3(10Z,13Z,16Z)/0:0)[iso2] --- DG(17:2(9Z,12Z)/22:2(13Z,16Z)/0:0)[iso2]	DG 39:4	DG 17:1_22:3 --- DG 17:2_22:2	AYEYHPNHLDLDSH-LOIHFLCZNA-N, BIVZAUAKPPVGPO-WFKGVDHLNA-N, BJCKRZYEIFMVOP-PIBNHRMYNA-N, BYRKXXGTHVCIIR-XINOORGGNA-N, CDEYHJWNPNUDAE-BIXSNLIQNA-N, CJZUQOHHSYTBTD-PEDPXMNENA-N, CWNAYPVRXVHOJU-USQSSKPQNA-N, CXHJICSBZYOGFP-OSGNMJCJNA-N, DQKAUGIDDDLPHI-LHYGPFFFNA-N, DSMQWXQGPDQKOS-ATMDMIMLNA-N, DXOGLSUGZYVKIC-LFVVPAGSNA-N, DYXSLNLDQQPFIK-NGRRQWIINA-N, FIZXNWCSTLNSFV-BTJTWMPUNA-N, FWIYOBDIYLOCNK-VYBYGCF…	C42H74O5	1	M+H --- M+NH4	676.585		8.6	8.54	57.5269	10.5458	51.9084	100	0.212962	0.0480072	0.207113	0.03989	0.774589	0.993093	0.11744	0.669737	0.765052	-0.0887445	0.430077	0.695343	0.0809865	0.183964	0.424651
PC 33:0	PC	RP_PosMSMS_854		Y	nonGL	PC 16:0_17:0 M+H Atlas						Glycerophospholipids [GP]	Glycerophosphocholines [GP01]	Diacylglycerophosphocholines [GP0101]	LMGP01010569	PC(16:0/17:0)	PC 33:0	PC 16:0_17:0	CNHYMCCAIZQMPA-UHFFFAOYNA-N	C41H82NO8P	1	M+H	748.581		6.53	6.51	67.2043	16.0496	98.4733	100	0.217585	0.0486924	0.208373	0.0129747	0.927589	0.998614	0.176492	0.531444	0.765052	-0.08106	0.482002	0.716738	0.0801703	0.199463	0.430857
TAG 58:8	TAG	RP_PosMSMS_1440, 1449		Y	GL	TG 18:0_18:2_22:6 M+NH4 Atlas --- TG 18:1_18:1_22:6 M+NH4 Atlas, TG 18:1_18:1_22:6 M+Na Atlas	Lipids and lipid-like molecules	Glycerolipids	Triradylcglycerols	HMDB0010465, HMDB0045098	TG(18:1(9Z)/18:1(9Z)/22:6(4Z,7Z,10Z,13Z,16Z,19Z)) --- TG(18:0/18:2(9Z,12Z)/22:6(4Z,7Z,10Z,13Z,16Z,19Z))	Glycerolipids [GL]	Triradylglycerols [GL03]	Triacylglycerols [GL0301]	LMGL03011388 --- LMGL03011389, LMGL03011389	TG(18:0/18:2(9Z,12Z)/22:6(4Z,7Z,10Z,13Z,16Z,19Z))[iso6] --- TG(18:1(9Z)/18:1(9Z)/22:6(4Z,7Z,10Z,13Z,16Z,19Z))[iso3], TG(18:1(9Z)/18:1(9Z)/22:6(4Z,7Z,10Z,13Z,16Z,19Z))[iso3]	TG 58:8	TG 18:0_18:2_22:6 --- TG 18:1_18:1_22:6, TG 18:1_18:1_22:6	HHLFQZIIXPUFCA-AQEYAGOHNA-N, QFVBKJOYLFHVKV-DNVUEQEENA-N, QFVBKJOYLFHVKV-DNVUEQEENA-N	C61H102O6	1	M+NH4, M+Na	948.7956, 953.7513		10.755	10.715	71.7742	6.36143	98.4733	100	0.217278	0.0488882	0.208373	0.0877988	0.537965	0.985013	0.192411	0.49476	0.765052	-0.0354565	0.758539	0.80495	0.0953094	0.126295	0.388039
TAG 44:1	TAG	RP_PosMSMS_907, 931		Y	GL	TG 10:0_16:0_18:1 M+NH4 Atlas --- TG 12:0_14:0_18:1 M+NH4 Atlas --- TG 12:0_16:0_16:1 M+NH4 Atlas --- TG 14:0_14:1_16:0 M+NH4 Atlas --- TG 14:0_15:0_15:1 M+NH4 Atlas, TG 10:0_10:0_24:1 M+Na Atlas --- TG 10:0_12:0_22:1 M+Na Atlas --- TG 10:0_13:0_21:1 M+Na Atlas --- TG 10:0_13:1_21:0 M+Na Atlas --- TG 10:0_14:0_20:1 M+Na Atlas --- TG 10:0_14:1_20:0 M+Na Atlas --- TG 10:0_15:0_19:1 M+Na Atlas --- T…	Lipids and lipid-like molecules	Glycerolipids	Triradylcglycerols	HMDB0042273, HMDB0243869, HMDB0042069, HMDB0042995	TG(14:0/14:0/16:1(9Z)) --- TG(14:0/14:1(9Z)/16:0) --- TG(15:0/15:0/14:1(9Z)) --- 1-Dodecanoyl-2-hexadecanoyl-3-(9Z-hexadecenoyl)-sn-glycerol	Glycerolipids [GL]	Triradylglycerols [GL03]	Triacylglycerols [GL0301]	LMGL03013217 --- LMGL03013322 --- LMGL03014139 --- LMGL03014166, LMGL03012646 --- LMGL03012701 --- LMGL03012757 --- LMGL03012842 --- LMGL03013193 --- LMGL03013217 --- LMGL03013245 --- LMGL03013271 --- LMGL03013297 --- LMGL03013322 --- LMGL03013678 --- LMGL03013706 --- LMGL03013733 --- LMGL03013759 --- LMGL03014139 --- LMGL03014166	TG(12:0/14:0/18:1(9Z))[iso6] --- TG(12:0/16:0/16:1(9Z))[iso6] --- TG(14:0/14:1(9Z)/16:0)[iso6] --- TG(14:0/15:0/15:1(9Z))[iso6], TG(12:0/12:0/20:1(11Z))[iso3] --- TG(12:0/13:0/19:1(9Z))[iso6] --- TG(12:0/14:0/18:1(9Z))[iso6] --- TG(12:0/14:1(9Z)/18:0)[iso6] --- TG(12:0/15:0/17:1(9Z))[iso6] --- TG(12:0/15:1(9Z)/17:0)[iso6] --- TG(12:0/16:0/16:1(9Z))[iso6] --- TG(13:0/13:0/18:1(9Z))[iso3] --- TG(13…	TG 44:1	TG 12:0_14:0_18:1 --- TG 12:0_16:0_16:1 --- TG 14:0_14:1_16:0 --- TG 14:0_15:0_15:1, TG 12:0_12:0_20:1 --- TG 12:0_13:0_19:1 --- TG 12:0_14:0_18:1 --- TG 12:0_14:1_18:0 --- TG 12:0_15:0_17:1 --- TG 12:0_15:1_17:0 --- TG 12:0_16:0_16:1 --- TG 13:0_13:0_18:1 --- TG 13:0_14:0_17:1 --- TG 13:0_14:1_17:0 --- TG 13:0_15:0_16:1 --- TG 13:0_15:1_16:0 --- TG 14:0_14:0_16:1 --- TG 14:0_14:1_16:0 --- TG 14:…	JCLYCUUABFXFLR-MNDPQUGUNA-N, JRZPEKVQFIJQHH-SDXDJHTJNA-N, MVBJOSAJFXMGHL-FCQUAONHNA-N, OUKDNADVOQVFAR-VZCXRCSSNA-N, PBCMCGPSXULJSG-FCQUAONHNA-N, ABNXDWILIVMNRZ-JZJYNLBNNA-N, AFLAVEXZXAIHHU-QINSGFPZNA-N, AVOSYSUBIBSHKI-VKAVYKQENA-N, BNHHNJCSMWFDJO-FCQUAONHNA-N, BQNTVQLKUUXQOI-PEZBUJJGNA-N, CHUBVMNAICAOHA-VKAVYKQENA-N, CTDXGQTZMWOMFF-VHXPQNKSNA-N, CTFWCRSTRKWODH-KAMYIIQDNA-N, CTGTUNJIKUDUCJ-LNVKXUE…	C47H88O6	2, 1	M+NH4, M+Na	766.6874, 771.6422	493.418	10.01	9.975	97.5806	11.6906	100	100	0.215472	0.0510615	0.216333	0.0536669	0.707008	0.993093	0.240402	0.393776	0.765052	0.117016	0.309667	0.654154	0.0905162	0.147133	0.400433
DAG 36:3	DAG	RP_PosMSMS_562		Y	GL	DG 18:1_18:2 M+NH4 Atlas	Lipids and lipid-like molecules	Fatty Acyls	Lineolic acids and derivatives	HMDB0007219	DG(18:1(9Z)/18:2(9Z,12Z)/0:0)	Glycerolipids [GL]	Diradylglycerols [GL02]	Diacylglycerols [GL0201]	LMGL02010056	DG(18:1(9Z)/18:2(9Z,12Z)/0:0)[iso2]	DG 36:3	DG 18:1_18:2	BLZVZPYMHLXLHG-RQOIEFAZNA-N	C39H70O5	1	M+NH4	636.553		7.32	7.29	67.7419	12.8302	100	100	0.217387	0.0523834	0.219854	-0.00176246	0.990295	0.998614	0.0908029	0.751239	0.765052	-0.0237321	0.839455	0.82056	0.0730292	0.249857	0.444224
TAG 56:7	TAG	RP_PosMSMS_1389, 1403		Y	GL	TG 16:0_18:1_22:6 M+NH4 Atlas --- TG 18:1_18:2_20:4 M+NH4 Atlas, TG 16:0_18:1_22:6 M+Na Atlas --- TG 18:1_18:2_20:4 M+Na Atlas	Lipids and lipid-like molecules	Glycerolipids	Triradylcglycerols	HMDB0044135, HMDB0050016	TG(16:0/18:1(9Z)/22:6(4Z,7Z,10Z,13Z,16Z,19Z)) --- TG(18:1(9Z)/18:2(9Z,12Z)/20:4(8Z,11Z,14Z,17Z))	Glycerolipids [GL]	Triradylglycerols [GL03]	Triacylglycerols [GL0301]	LMGL03010925	TG(16:0/18:1(9Z)/22:6(4Z,7Z,10Z,13Z,16Z,19Z))[iso6]	TG 56:7	TG 16:0_18:1_22:6	WSZCBVABHNUPSE-TXLSFYGYNA-N, YGOKCUTVSFRDFI-HTDOMISSNA-N	C59H100O6	1	M+NH4, M+Na	922.7794, 927.7348		10.59	10.555	81.1828	6.21958	98.4733	100	0.212456	0.0526729	0.219854	0.0216509	0.878624	0.996741	0.101309	0.717735	0.765052	-0.145458	0.202646	0.608693	0.0765072	0.217725	0.443666
TAG 59:12	TAG	RP_PosMS1_1450		Y	GL	DGGA 20:0_26:2 M+NH4 Atlas --- DGGA 20:1_26:1 M+NH4 Atlas --- DGGA 22:0_24:2 M+NH4 Atlas --- DGGA 22:1_24:1 M+NH4 Atlas --- DGGA 24:0_22:2 M+NH4 Atlas --- DGGA 25:0_21:2 M+NH4 Atlas --- DGGA 26:0_20:2 M+NH4 Atlas --- DGGA 27:0_19:2 M+NH4 Atlas --- TG 11:0_16:3_32:9 M+NH4 Atlas --- TG 11:0_16:4_32:8 M+NH4 Atlas --- TG 11:0_18:4_30:8 M+NH4 Atlas --- TG 11:0_18:5_30:7 M+NH4 Atlas --- TG 11:0_20:5_28…	Lipids and lipid-like molecules	Glycerolipids	Triradylcglycerols	HMDB0043799	TG(15:0/22:6(4Z,7Z,10Z,13Z,16Z,19Z)/22:6(4Z,7Z,10Z,13Z,16Z,19Z))	Glycerolipids [GL]	Triradylglycerols [GL03]	Triacylglycerols [GL0301]	LMGL03011824 --- LMGL03011833 --- LMGL03012926 --- LMGL03015706	TG(15:0/22:6(4Z,7Z,10Z,13Z,16Z,19Z)/22:6(4Z,7Z,10Z,13Z,16Z,19Z))[iso3] --- TG(15:1(9Z)/22:5(7Z,10Z,13Z,16Z,19Z)/22:6(4Z,7Z,10Z,13Z,16Z,19Z))[iso6] --- TG(17:1(9Z)/20:5(5Z,8Z,11Z,14Z,17Z)/22:6(4Z,7Z,10Z,13Z,16Z,19Z))[iso6] --- TG(17:2(9Z,12Z)/20:5(5Z,8Z,11Z,14Z,17Z)/22:5(7Z,10Z,13Z,16Z,19Z))[iso6]	TG 59:12	TG 15:0_22:6_22:6 --- TG 15:1_22:5_22:6 --- TG 17:1_20:5_22:6 --- TG 17:2_20:5_22:5	ANCCKVYQBMZXIE-LIBKOIKINA-N, AVNCRWKIMVTGDZ-VJVQKSPHNA-N, BCIDVPIAEAFXPU-ITTWRFGSNA-N, BPNXTXWCJVDQLO-BLCHARGVNA-N, BUGAMORLACKMIL-TZKLIYFUNA-N, CLUYFHOWMVMLCQ-URVAWFDXNA-N, CWORXPMNBGEYDO-SEIXGVPGNA-N, DLEVQZGDKJDALJ-WOTREGJNNA-N, DSFZTBOOYWWYBS-IBJRRFJSNA-N, DXRVHKMFONFZTE-CVIFLSHVNA-N, FISDSOJXLVGGQB-OGDCKYMUNA-N, FIVGPDCMLIGIBW-FDORGKCENA-N, FLMTUUXKKZIBQS-BTDQIQSVNA-N, FTQXLKAZNJRPQQ-GMVFLHP…	C62H96O6	1	M+NH4	954.754		10.72	10.7	88.172	8.33673	100	100	0.21908	0.0528249	0.219854	0.117038	0.422955	0.985013	0.061462	0.83172	0.769105	0.0018262	0.987682	0.841471	0.0950589	0.137062	0.391113
N-Acetyl-D-galactosamine 4-sulfate	Amino acids, peptides, and analogues	HILIC_NegMSMS_582			nonGL	N-Acetyl-D-galactosamine 4-sulfate M-H NIST	Organic acids and derivatives	Carboxylic acids and derivatives	Amino acids, peptides, and analogues										RKFMAQNDSSSRTH-OSMVPFSASA-N	C8H15NO9S	1	M-H	300.039		11	10.96	67.4797	7.6243	100	100	-0.216248	0.0547406	0.226495	-0.154534	0.286962	0.985013	-0.277217	0.33427	0.765052	0.233655	0.044887	0.442848	-0.11206	0.0774271	0.363249
PI 36:1	PI	RP_NegMSMS_692		Y	nonGL	PI 18:0_18:1 M-H Atlas	Lipids and lipid-like molecules	Glycerophospholipids	Glycerophosphoinositols	HMDB0240667	PI(18:0/18:1(9Z))	Glycerophospholipids [GP]	Glycerophosphoinositols [GP06]	Diacylglycerophosphoinositols [GP0601]	LMGP06010957	PI(18:0/18:1(9Z))	PI 36:1	PI 18:0_18:1	YOBFISPJJWPPTK-ZZEZOPTANA-N	C45H85O13P	2	M-H	863.566	241.011	5.83	5.84	61.4555	9.97313	99.2366	100	0.216859	0.0553411	0.227648	0.177356	0.223707	0.985013	0.0795834	0.783204	0.765052	0.0937248	0.427454	0.695343	0.106899	0.0940606	0.363954
Trigonelline	Others	HILIC_PosMSMS_202			nonGL	Trigonelline M+H HMDB	Alkaloids and derivatives			HMDB0000875	Trigonelline								WWNNZCOKKKDOPX-UHFFFAOYSA-N	C7H7NO2	1	M+H	138.054		10.52	10.49	98.6486	11.6221	96.2406	100	-0.203697	0.0570643	0.232976	-0.285432	0.0370386	0.985013	-0.405293	0.136344	0.765052	0.0178415	0.873292	0.827757	-0.139688	0.0198841	0.250915
LPC O-24:1	LPC-O	RP_PosMSMS_496		Y	nonGL	LPC O-24:1 M+H Atlas													LANVDNZVFGFCTB-PFONDFGANA-N	C32H66NO6P	1	M+H	592.467		4.67	4.65	66.9355	12.5292	100	100	-0.205484	0.0572949	0.232976	0.0175918	0.899799	0.997945	-0.141435	0.608444	0.765052	-0.238408	0.032787	0.414557	-0.0687014	0.261659	0.447247
LPC 16:0	LPC	RP_Pos, RP_NegMSMS_360, 387, 164		Y	nonGL	Lyso-PC(16:0) M+H NIST --- PC O-16:0 M+H Atlas, LPC 16:0 M+Na Atlas, LPC 16:0 M+HCOO Atlas	Lipids and lipid-like molecules	Glycerophospholipids	Glycerophosphocholines	HMDB0010382, HMDB0010382, HMDB0256091	LysoPC(16:0/0:0) --- 1-Palmitoylphosphatidylcholine	Glycerophospholipids [GP]	Glycerophosphocholines [GP01]	Monoacylglycerophosphocholines [GP0105]	LMGP01050018, LMGP01050018 --- LMGP01050113	PC(16:0/0:0), PC(16:0/0:0) --- PC(16:0/0:0)[rac]	LPC 16:0	LPC 16:0	ASWBNKHCZGQVJV-HSZRJFAPSA-N, GDMHMXIBVHRZGP-UHFFFAOYNA-N, ASWBNKHCZGQVJV-UHFFFAOYNA-N	C24H50NO7P	1, 2	M+H, M+Na, M+HCOO	496.338, 518.3197, 540.3314	480.304	2.87	2.85	80.6452	19.4918	100	100	-0.202308	0.0577796	0.233605	-0.0345649	0.80194	0.993093	-0.232227	0.393252	0.765052	-0.115923	0.296875	0.653825	-0.0822519	0.172432	0.413096
PA 46:5	PA	RP_NegMS1_634		Y	nonGL	PA 20:1_26:4 M-H Atlas --- PA 22:1_24:4 M-H Atlas --- PA 24:0_22:5 M-H Atlas --- PA 24:1_22:4 M-H Atlas --- PA 24:2_22:3 M-H Atlas --- PA 26:0_20:5 M-H Atlas --- PA 26:1_20:4 M-H Atlas --- PA 26:2_20:3 M-H Atlas --- PEtOH 18:1_26:4 M-H Atlas --- PEtOH 20:1_24:4 M-H Atlas --- PEtOH 22:0_22:5 M-H Atlas --- PEtOH 22:1_22:4 M-H Atlas --- PEtOH 22:2_22:3 M-H Atlas --- PEtOH 24:0_20:5 M-H Atlas --- PEt…	Lipids and lipid-like molecules	Glycerophospholipids	Glycerophosphates	HMDB0115451	PA(24:0/22:5(7Z,10Z,13Z,16Z,19Z))								ADJQUIBCRPNWKM-PSFFNQFONA-N, BFESERKIGDPVEQ-NQMBTPPKNA-N, BMNYBKJUMUHELU-YFZNWQETNA-N, BPMDIBPSLFIZFP-VDLIDOGWNA-N, BVAJZJJNWQLTFX-HDTVVTMWNA-N, IEHARTFLQIOMSP-GQQIUOJVNA-N, JCYYNCGWHOFYQC-WARBFJPKNA-N, JPESYMKJPOXTKF-FIYYLASMNA-N, JPKYQTPNIASCMT-WYAIZQBMNA-N, JVAURTODGYBQRI-SSMZVYFMNA-N, LJMPZHDAHRDXEY-DXPXESHUNA-N, MZWRCGFFEYNBKN-RCILNJRANA-N, NSGDGBDJXXWWRA-QFLPHEOCNA-N, NXHSJXVOMDUVAI-GAXXYEE…	C49H87O8P	1	M-H	833.611		7.08	7.05	62.5337	27.6137	98.4733	99.1228	0.213223	0.0600133	0.240278	0.132754	0.363915	0.985013	0.223347	0.440068	0.765052	0.0327434	0.782203	0.809112	0.104234	0.103175	0.369753
Edetic Acid	Xenobiotics	HILIC_PosMSMS_929, 1046			nonGL	Ethylenediaminetetraacetic acid M+H NIST, Ethylenediaminetetraacetic acid M+Na NIST	Organic acids and derivatives	Carboxylic acids and derivatives	Tetracarboxylic acids and derivatives	HMDB0015109	Edetic Acid								KCXVZYZYPLLWCC-UHFFFAOYSA-N	C10H16N2O8	1	M+H, M+Na	293.0981, 315.0797		15.805	15.82	72.4324	20.538	100	100	0.212206	0.0601094	0.240278	0.226034	0.118999	0.985013	-0.093282	0.746326	0.765052	-0.110008	0.349912	0.669896	0.106287	0.094991	0.363954
TAG 60:4	TAG	RP_PosMSMS_1509, 1520		Y	GL	TG 18:1_18:2_24:1 M+NH4 Atlas --- TG 18:2_18:2_24:0 M+NH4 Atlas, TG 10:0_12:0_38:4 M+Na Atlas --- TG 10:0_14:0_36:4 M+Na Atlas --- TG 10:0_14:1_36:3 M+Na Atlas --- TG 10:0_16:0_34:4 M+Na Atlas --- TG 10:0_16:1_34:3 M+Na Atlas --- TG 10:0_16:2_34:2 M+Na Atlas --- TG 10:0_16:3_34:1 M+Na Atlas --- TG 10:0_16:4_34:0 M+Na Atlas --- TG 10:0_18:0_32:4 M+Na Atlas --- TG 10:0_18:1_32:3 M+Na Atlas --- TG 1…	Lipids and lipid-like molecules	Glycerolipids	Triradylcglycerols	HMDB0047374, HMDB0044407, HMDB0044533, HMDB0045144, HMDB0045319, HMDB0045345, HMDB0045602, HMDB0045932, HMDB0046375, HMDB0046549, HMDB0046691, HMDB0047561, HMDB0048711, HMDB0049931, HMDB0050044, HMDB0050515, HMDB0051486, HMDB0051597, HMDB0052461	TG(16:0/22:2(13Z,16Z)/22:2(13Z,16Z)) --- TG(16:0/20:4(8Z,11Z,14Z,17Z)/24:0) --- TG(18:0/20:2n6/22:2(13Z,16Z)) --- TG(18:0/18:4(6Z,9Z,12Z,15Z)/24:0) --- TG(18:0/20:4(8Z,11Z,14Z,17Z)/22:0) --- TG(20:0/20:0/20:4(8Z,11Z,14Z,17Z)) --- TG(20:0/20:2n6/20:2n6) --- TG(22:0/20:0/18:4(6Z,9Z,12Z,15Z)) --- TG(22:0/20:1(11Z)/18:3(9Z,12Z,15Z)) --- TG(22:0/20:2n6/18:2(9Z,12Z)) --- TG(24:0/18:2(9Z,12Z)/18:2(9Z,12…	Glycerolipids [GL]	Triradylglycerols [GL03]	Triacylglycerols [GL0301]	LMGL03011234 --- LMGL03011235 --- LMGL03011356 --- LMGL03011357 --- LMGL03011414 --- LMGL03011415 --- LMGL03011423 --- LMGL03011424 --- LMGL03011425 --- LMGL03011501 --- LMGL03011502 --- LMGL03011516 --- LMGL03011517 --- LMGL03011518 --- LMGL03011578 --- LMGL03011659 --- LMGL03011729 --- LMGL03011733 --- LMGL03013111 --- LMGL03013132 --- LMGL03016589 --- LMGL03016684	TG(16:0/22:1(13Z)/22:3(10Z,13Z,16Z))[iso6] --- TG(16:0/22:2(13Z,16Z)/22:2(13Z,16Z))[iso3] --- TG(16:1(9Z)/22:0/22:3(10Z,13Z,16Z))[iso6] --- TG(16:1(9Z)/22:1(13Z)/22:2(13Z,16Z))[iso6] --- TG(17:1(9Z)/21:0/22:3(10Z,13Z,16Z))[iso6] --- TG(17:2(9Z,12Z)/21:0/22:2(13Z,16Z))[iso6] --- TG(18:0/20:1(11Z)/22:3(10Z,13Z,16Z))[iso6] --- TG(18:0/20:2(11Z,14Z)/22:2(13Z,16Z))[iso6] --- TG(18:1(9Z)/20:0/22:3(10Z,…	TG 60:4	TG 16:0_22:1_22:3 --- TG 16:0_22:2_22:2 --- TG 16:1_22:0_22:3 --- TG 16:1_22:1_22:2 --- TG 17:1_21:0_22:3 --- TG 17:2_21:0_22:2 --- TG 18:0_20:1_22:3 --- TG 18:0_20:2_22:2 --- TG 18:1_20:0_22:3 --- TG 18:1_20:1_22:2 --- TG 18:1_20:2_22:1 --- TG 18:2_20:0_22:2 --- TG 18:2_20:1_22:1 --- TG 18:2_20:2_22:0 --- TG 18:3_20:0_22:1 --- TG 18:3_20:1_22:0 --- TG 18:4_20:0_22:0 --- TG 18:4_21:0_21:0 --- TG …	MENKUUOOQRGDSS-ZQQHQYNCNA-N, XZAGSBKJZPKPEY-YFNLZEDVNA-N, ACZASUQXRILREG-BNINLGCINA-N, ADOBHPWXSADQKB-DITBIAKCNA-N, AFCARJHPTWBXMP-NDJMKUGSNA-N, AGXJZEMUKUFWEP-VEGREPQHNA-N, AHEJGKZSHPHKMW-YEMBNXSPNA-N, AHYOFQHJCROZHS-XIWPLKEYNA-N, AICLQUNXZAFFGB-HRCUNEKLNA-N, AICMDXVOSWMLEK-DXZNHEADNA-N, AIJZDCRCOWFNRQ-YBQWMRSQNA-N, AKPKCLGDROTCJT-MQBCOREXNA-N, ALPJLRIZDZGUSC-ONNGZFICNA-N, AQLOTZOLEYWFCG-SCHCMUD…	C63H114O6	1	M+NH4, M+Na	984.8892, 989.8442		11.8	11.79	45.9677	15.015	76.3359	100	0.210864	0.061075	0.242216	-0.0650816	0.65447	0.993093	0.357026	0.21279	0.765052	-0.0426868	0.716599	0.799097	0.0718838	0.259351	0.447247
FA 16:4;O	FA - Octadecanoids	HILIC_NegMS1_476, 1120		Y	nonGL	Dinor-12-oxophytodienoic Acid M-H NIST, Dinor-12-oxophytodienoic Acid 2M-H NIST						Fatty Acyls [FA]	Octadecanoids [FA02]	12-oxophytodienoic acid metabolites [FA0201]	LMFA02010018	dinor-12-oxo PDA	FA 16:4;O		SZVNKXCDJUBPQO-DWMAKUKJSA-N	C16H24O3	1	M-H, 2M-H	263.1644, 527.3391		1.355	1.165	63.4146	21.0704	97.7444	100	-0.206391	0.061351	0.242216	-0.0887212	0.53329	0.985013	-0.540892	0.0527333	0.765052	0.178898	0.11836	0.51752	-0.109251	0.0788245	0.363249
FA 10:1;O2	FA - Fatty Acids and Conjugates	HILIC_NegMSMS_288		Y	nonGL	Sebacic acid M-H HMDB --- Sebacic acid; LC-ESI-QTOF; MS2; CE M-H MassBank	Lipids and lipid-like molecules	Fatty Acyls	Fatty acids and conjugates	HMDB0000792	Sebacic acid	Fatty Acyls [FA]	Fatty Acids and Conjugates [FA01]	Dicarboxylic acids [FA0117]	LMFA01170006	Sebacic acid	FA 10:1;O2		CXMXRPHRNRROMY-UHFFFAOYSA-N	C10H18O4	1	M-H	201.113		3.16	3.21	46.3415	16.3366	64.6617	100	-0.204415	0.0616211	0.242216	-0.234134	0.0952653	0.985013	-0.426274	0.124925	0.765052	0.128385	0.259692	0.636017	-0.131045	0.032829	0.305104
Hydrocinnamic acid	Phenylpropanoids and polyketides	HILIC_NegMS1_125			nonGL	2,3-Dimethylbenzoic acid M-H NIST --- 2-Methoxy-4-vinylphenol M-H FiehnHILIC --- 2-Methoxy-4-vinylphenol M-H HMDB --- 3,4-Dimethylbenzoic acid M-H NIST --- 3-Methylphenylacetic acid M-H NIST --- 4-Ethylbenzoic acid M-H NIST --- 4-Methylphenylacetic acid M-H NIST --- Benzyl acetate M-H HMDB --- Benzylacetate M-H FiehnHILIC --- Hydrocinnamic acid M-H FiehnHILIC --- Hydrocinnamic acid M-H HMDB	Phenylpropanoids and polyketides	Phenylpropanoic acids		HMDB0000764	Hydrocinnamic acid								GJMPSRSMBJLKKB-UHFFFAOYSA-N, GXXXUZIRGXYDFP-UHFFFAOYSA-N, OPVAJFQBSDUNQA-UHFFFAOYSA-N, QUKGYYKBILRGFE-UHFFFAOYSA-N, RIZUCYSQUWMQLX-UHFFFAOYSA-N, XMIIGOLPHOKFCH-UHFFFAOYSA-N, YOMSJEATGXXYPX-UHFFFAOYSA-N, ZQVKTHRQIXSMGY-UHFFFAOYSA-N	C9H10O2	1	M-H	149.061		1.74	1.67	67.2087	24.484	93.2331	100	-0.208886	0.0654038	0.254365	-0.187359	0.198958	0.985013	-0.475159	0.0985377	0.765052	-0.149707	0.204327	0.608693	-0.125844	0.0483395	0.336408
Glycerol 1-myristate	Xenobiotics	RP_PosMSMS_3			nonGL	Glycerol 1-myristate M+H NIST	Lipids and lipid-like molecules	Glycerolipids	Monoradylglycerols	HMDB0304951	Glycerol 1-myristate								DCBSHORRWZKAKO-UHFFFAOYSA-N	C17H34O4	1	M+H	303.252		3.04	3.04	97.3118	13.5886	93.1298	100	-0.208016	0.065431	0.254365	-0.188082	0.195378	0.985013	-0.0922211	0.749105	0.765052	0.0524952	0.656085	0.785957	-0.106792	0.0933923	0.363954
TAG 54:6	TAG	RP_PosMSMS_1327, 1336		Y	GL	TG 16:0_18:2_20:4 M+NH4 Atlas --- TG 18:1_18:2_18:3 M+NH4 Atlas --- TG 18:2_18:2_18:2 M+NH4 Atlas, TG 16:0_18:2_20:4 M+Na Atlas --- TG 18:2_18:2_18:2 M+Na Atlas	Lipids and lipid-like molecules	Glycerolipids	Triradylcglycerols	HMDB0005474	TG(18:2(9Z,12Z)/18:2(9Z,12Z)/18:2(9Z,12Z))	Glycerolipids [GL]	Triradylglycerols [GL03]	Triacylglycerols [GL0301]	LMGL03010371	TG(18:2(9Z,12Z)/18:2(9Z,12Z)/18:2(9Z,12Z))	TG 54:6	TG 18:2_18:2_18:2	HBOQXIRUPVQLKX-BBWANDEASA-N, NPELAMJIYLFQEL-ISZDOGAUNA-N, OTUIORVXGJUHBH-QSVDUOTDNA-N, HBOQXIRUPVQLKX-BBWANDEASA-N, NPELAMJIYLFQEL-ISZDOGAUNA-N	C57H98O6	1	M+NH4, M+Na	896.7637, 901.7198		10.425	10.425	96.7742	14.8718	99.2366	100	0.209419	0.065849	0.254591	-0.0456422	0.756252	0.993093	0.316246	0.275405	0.765052	-0.123083	0.29934	0.653825	0.0731658	0.256087	0.445606
PC O-40:10	PC-O	RP_PosMSMS_1065		Y	nonGL	LPC 38:7 M+Na Atlas --- PC O-40:10 M+H Atlas													LLOIPLZMUMXJFW-QAYSHOGENA-N, SWJKPCVJHLFGEJ-SGGLCHPTNA-N	C46H80NO7P, C48H78NO7P	1	M+H --- M+Na	812.551		6.4	6.13	38.7097	25.3994	86.2595	100	0.207191	0.0684355	0.26156	0.0526368	0.719966	0.993093	0.105755	0.715648	0.765052	0.0652449	0.582424	0.770169	0.0810423	0.207435	0.436535
Lycopene	Xenobiotics	RP_PosMS1_414	RT_1		nonGL	Lycopene M+H HMDB	Lipids and lipid-like molecules	Prenol lipids	Tetraterpenoids	HMDB0003000	Lycopene	Prenol Lipids [PR]	Isoprenoids [PR01]	C40 isoprenoids (tetraterpenes) [PR0107]	LMPR01070257	Lycopene			OAIJSZIZWZSQBC-GYZMGTAESA-N	C40H56	1	M+H	537.44		9.02	9.02	61.5591	9.20636	87.7863	100	0.201212	0.0686452	0.26156	0.079027	0.57953	0.993093	0.2446	0.385241	0.765052	-0.115338	0.316391	0.654154	0.0911025	0.14425	0.400083
PC 38:7	PC	RP_Pos, RP_NegMSMS_1106, 665		Y	nonGL	PC 38:7 M+Na Atlas, PC 16:1_22:6 M+HCOO Atlas	Lipids and lipid-like molecules	Glycerophospholipids	Glycerophosphocholines	HMDB0008023	PC(16:1(9Z)/22:6(4Z,7Z,10Z,13Z,16Z,19Z))	Glycerophospholipids [GP]	Glycerophosphocholines [GP01]	Diacylglycerophosphocholines [GP0101]	LMGP01010696	PC(16:1(9Z)/22:6(4Z,7Z,10Z,13Z,16Z,19Z))	PC 38:7	PC 16:1_22:6	SUXHMUSOGHOWMU-ZDNAGYMQNA-N, WEKYSOYSMAUCCS-PFZRPMEUNA-N, DLRNZUPJXRVWRW-LKDYKOESNA-N	C46H78NO8P	1, 2	M+Na, M+HCOO	826.5326, 848.5439	253.213	5.215	5.195	67.2043	13.7707	98.4733	100	0.201327	0.0688616	0.26156	0.145381	0.307822	0.985013	0.257095	0.361983	0.765052	-0.244395	0.0324212	0.414557	0.10457	0.093619	0.363954
Quinolinic acid	Pyridines and derivatives	HILIC_NegMSMS_185	RT_1		nonGL	Quinolinic acid M-H HMDB	Organoheterocyclic compounds	Pyridines and derivatives	Pyridinecarboxylic acids and derivatives	HMDB0000232	Quinolinic acid								GJAWHXHKYYXBSV-UHFFFAOYSA-N	C7H5NO4	1	M-H	166.018		9.73	9.71	72.8997	27.1952	100	100	-0.203215	0.06913	0.26156	-0.238502	0.096296	0.985013	-0.618055	0.0284744	0.765052	0.266554	0.0206813	0.350248	-0.140981	0.024456	0.272606
PG O-38:4	PG	RP_NegMSMS_499		Y	nonGL	PG O-12:0_26:4 M-H Atlas --- PG O-14:0_24:4 M-H Atlas --- PG O-14:1_24:3 M-H Atlas --- PG O-16:0_22:4 M-H Atlas --- PG O-16:1_22:3 M-H Atlas --- PG O-16:2_22:2 M-H Atlas --- PG O-16:3_22:1 M-H Atlas --- PG O-16:4_22:0 M-H Atlas --- PG O-17:2_21:2 M-H Atlas --- PG O-18:0_20:4 M-H Atlas --- PG O-18:1_20:3 M-H Atlas --- PG O-18:2_20:2 M-H Atlas --- PG O-18:3_20:1 M-H Atlas --- PG O-18:4_20:0 M-H Atl…						Glycerophospholipids [GP]	Glycerophosphoglycerols [GP04]	1-alkyl,2-acylglycerophosphoglycerols [GP0402]	LMGP04020056	PG(O-20:0/18:4(6Z,9Z,12Z,15Z))	PG O-38:4	PG O-20:0/18:4	BJMUMDYZZTVNNT-ZJCTUUHQNA-N, BMAVGEVVTGWOQB-GMMWPOIXNA-N, BYNHBWDHNIHJRB-PYQGTGCGNA-N, CXOKCFBKJYSHFG-KWXKLSQINA-N, FJZNLRYOMSUKEB-OFAZCYPNNA-N, GFPJKWNAWKAHTB-BHYOAKPMNA-N, IMPPWEXFHNRLBK-ZKVKLVECNA-N, IWBVSYRKXVWXTE-UMWXEKTDNA-N, IXHIRWQEPOEVOY-DVIIXANDNA-N, JPOUIPBVJUYCFP-MURDYDGNNA-N, JUICAVFFEVPISM-PHLVFGIENA-N, LGUWMGYQOYRPDQ-BHYOAKPMNA-N, ODKSALDLQJIOMO-VJEAKVRINA-N, OEUKQPJQFUVKID-YGVRUMB…	C44H81O9P	1	M-H	783.556		3.97	3.97	9.16442	24.499	24.4275	100	-0.203207	0.070527	0.262175	-0.162012	0.262726	0.985013	-0.062981	0.826243	0.769105	0.0414219	0.723975	0.799097	-0.0987895	0.11909	0.382475
PC O-40:5	PC-O	RP_NegMSMS_697		Y	nonGL	PC O-20:1_20:4 M+HCOO Atlas						Glycerophospholipids [GP]	Glycerophosphocholines [GP01]	1-alkyl,2-acylglycerophosphocholines [GP0102]	LMGP01020274	PC(O-20:1(11Z)/20:4(8Z,11Z,14Z,17Z))	PC O-40:5	PC O-20:1/20:4	QZEYUKQNWUMXFF-UNBGXMKUNA-N	C48H88NO7P	1	M+HCOO	866.628		7.02	7	38.0054	21.5115	93.1298	99.1228	-0.197375	0.0708124	0.262175	-0.0818535	0.56148	0.988506	-0.165832	0.551874	0.765052	-0.0796112	0.484716	0.716738	-0.0865416	0.16071	0.40357
TAG O-56:9	TAG-O	RP_PosMS1_1357		Y	GL	TG O-12:0_22:3_22:6 M+Na Atlas --- TG O-12:0_22:4_22:5 M+Na Atlas --- TG O-14:0_20:3_22:6 M+Na Atlas --- TG O-14:0_20:4_22:5 M+Na Atlas --- TG O-14:0_20:5_22:4 M+Na Atlas --- TG O-14:1_20:2_22:6 M+Na Atlas --- TG O-14:1_20:3_22:5 M+Na Atlas --- TG O-14:1_20:4_22:4 M+Na Atlas --- TG O-14:1_20:5_22:3 M+Na Atlas --- TG O-16:0_18:3_22:6 M+Na Atlas --- TG O-16:0_18:4_22:5 M+Na Atlas --- TG O-16:0_18:5…	Lipids and lipid-like molecules	Glycerolipids	Triradylcglycerols	HMDB0055784	TG(20:5(5Z,8Z,11Z,14Z,17Z)/18:4(6Z,9Z,12Z,15Z)/O-18:0)								ABQPLDIGCPNBMP-WLPXHXGBNA-N, AFHDEYGNORMWBX-RAQYAAFWNA-N, AHYQQBJTGNKCPV-DGGTZXLFNA-N, APNGWLJIJMQUMV-AIRRONQCNA-N, ARBNCTMYINHNHQ-QZLFPDRXNA-N, ATOQWDBXVGCJTO-IDSINPORNA-N, AWJPGLRNAVFGNG-JMNPHOBGNA-N, BAFWPIQLXQVLGF-QCRAOBKQNA-N, BJTWMLQELGMVAH-LYUWQUFRNA-N, BRHIWBWTZLFSQB-GRMUFXDJNA-N, BWORABSUOPWVNJ-IYVLQWIFNA-N, CLNSWYVEOBEJMG-ARUJWNKLNA-N, CQWQFAWEFJJKRB-CMJRUJOSNA-N, CSIXXLKWRFGOSV-KBDLYXP…	C59H98O5	1	M+Na	909.725		11.01	10.99	70.9677	21.0841	97.7099	100	0.201134	0.0709395	0.262175	0.0410913	0.775084	0.993093	0.331732	0.24185	0.765052	-0.0192066	0.868819	0.826417	0.0880554	0.161543	0.40357
TAG 55:11	TAG	RP_PosMS1_1333		Y	GL	DGGA 16:0_26:1 M+NH4 Atlas --- DGGA 18:0_24:1 M+NH4 Atlas --- DGGA 20:0_22:1 M+NH4 Atlas --- DGGA 21:0_21:1 M+NH4 Atlas --- DGGA 22:0_20:1 M+NH4 Atlas --- DGGA 23:0_19:1 M+NH4 Atlas --- DGGA 24:0_18:1 M+NH4 Atlas --- DGGA 25:0_17:1 M+NH4 Atlas --- DGGA 26:0_16:1 M+NH4 Atlas --- DGGA 27:0_15:1 M+NH4 Atlas --- TG 11:0_16:4_28:7 M+NH4 Atlas --- TG 11:0_18:4_26:7 M+NH4 Atlas --- TG 11:0_18:5_26:6 M+N…						Glycerolipids [GL]	Triradylglycerols [GL03]	Triacylglycerols [GL0301]	LMGL03012972 --- LMGL03014108 --- LMGL03015586 --- LMGL03016103	TG(13:0/20:5(5Z,8Z,11Z,14Z,17Z)/22:6(4Z,7Z,10Z,13Z,16Z,19Z))[iso6] --- TG(15:1(9Z)/18:4(6Z,9Z,12Z,15Z)/22:6(4Z,7Z,10Z,13Z,16Z,19Z))[iso6] --- TG(15:1(9Z)/20:5(5Z,8Z,11Z,14Z,17Z)/20:5(5Z,8Z,11Z,14Z,17Z))[iso3] --- TG(17:2(9Z,12Z)/18:4(6Z,9Z,12Z,15Z)/20:5(5Z,8Z,11Z,14Z,17Z))[iso6]	TG 55:11	TG 13:0_20:5_22:6 --- TG 15:1_18:4_22:6 --- TG 15:1_20:5_20:5 --- TG 17:2_18:4_20:5	AXWJYGQVVMWITG-HUPNWCHHNA-N, BUIBYGULCCSLLL-KJLXSEPWNA-N, BVAKKPJATBQDQA-PIKDQZOFNA-N, BZCFKIIFHPNSER-QQTULTPQNA-N, CVSDMYYDTFKCLZ-MRCUWXFGNA-N, CYZWETPNILMRFT-GUVXTBGONA-N, DOLOZBUILCHYCP-XNUQYZRDNA-N, FEWNYTHMMYGYRV-FENBJABLNA-N, GAUVZHKQTZGONR-JNWICJMFNA-N, GKHMKBOPKYODPA-YHAVHNCKNA-N, GUWSQQUHEIJTGD-CDDOXDSXNA-N, GZBDSUQPMBSFJZ-VZCXRCSSNA-N, HETFOPYLYNLPMH-CTBPURIUNA-N, IHSJLNREBCOCHE-LJACGMF…	C58H90O6	1	M+NH4	900.709		10.18	10.15	73.3871	14.7772	99.2366	100	0.205367	0.0711261	0.262175	-0.0297021	0.839818	0.993093	0.278454	0.336827	0.765052	-0.109066	0.357664	0.671205	0.0730935	0.256193	0.445606
SM 36:1;O2	SM	RP_PosMSMS_870, 805		Y	nonGL	SM 36:1;2O M+Na Atlas, N-Stearoyl-4-sphingenyl-1-O-phosphorylcholine M+H NIST	Lipids and lipid-like molecules	Sphingolipids	Phosphosphingolipids	HMDB0001348	SM(d18:1/18:0)	Sphingolipids [SP]	Phosphosphingolipids [SP03]	Ceramide phosphocholines (sphingomyelins) [SP0301]	LMSP03010001	SM(d18:1/18:0)	SM 36:1;O2	SM 18:1;O2/18:0	CMMXUBGHSNQBNN-ZCXUNETKNA-N, LKQLRGMMMAHREN-YJFXYUILSA-N	C41H83N2O6P	1	M+Na, M+H	753.5844, 731.6019		6.175	6.145	97.5806	6.62718	100	100	0.20629	0.0712704	0.262175	-0.0394604	0.789302	0.993093	0.0306471	0.916421	0.769107	-0.147562	0.214807	0.614668	0.0592611	0.36022	0.499067
FA 16:1	FA - Fatty Acids and Conjugates	HILIC_Pos, HILIC_NegMS1_634, 442		Y	nonGL	Palmitelaidic acid M+H-H2O NIST, FA 16:1 M-H Atlas --- Palmitelaidic acid M-H HMDB --- Palmitelaidic acid M-H NIST --- Palmitoleic acid M-H FiehnHILIC --- Palmitoleic acid M-H HMDB --- cis-7-Hexadecenoic acid M-H NIST	Lipids and lipid-like molecules	Fatty Acyls	Fatty acids and conjugates	HMDB0012328, HMDB0002186, HMDB0003229, HMDB0247596	Hypogeic acid --- Palmitoleic acid --- Palmitelaidic acid --- 9-Hexadecenoic acid, (9Z)-	Fatty Acyls [FA]	Fatty Acids and Conjugates [FA01]	Unsaturated fatty acids [FA0103]	LMFA01030057, LMFA01030055 --- LMFA01030056 --- LMFA01030057	trans-9-palmitoleic acid, 7Z-palmitoleic acid --- cis-9-palmitoleic acid --- trans-9-palmitoleic acid	FA 16:1		SECPZKHBENQXJG-BQYQJAHWSA-N, PJHOFUXBXJNUAC-KTKRTIGZSA-N, SECPZKHBENQXJG-BQYQJAHWSA-N, SECPZKHBENQXJG-FPLPWBNLSA-N, SECPZKHBENQXJG-UHFFFAOYSA-N	C16H30O2	1	M+H-H2O, M-H	237.221, 253.2168		1.4	1.4	75.9459	5.92336	100	100	-0.204829	0.0715159	0.262175	-0.119606	0.414357	0.985013	-0.0591388	0.838517	0.769105	0.0174923	0.882811	0.828239	-0.0909243	0.156552	0.401182
N-Acetylhistidine	Amino acids, peptides, and analogues	HILIC_PosMS1_487	RT_1		nonGL	N-Acetylhistidine M+H FiehnHILIC --- N-Acetylhistidine M+H HMDB	Organic acids and derivatives	Carboxylic acids and derivatives	Amino acids, peptides, and analogues	HMDB0032055	N-Acetylhistidine								KBOJOGQFRVVWBH-UHFFFAOYNA-N, KBOJOGQFRVVWBH-ZETCQYMHSA-N	C8H11N3O3	1	M+H	198.085		14.82	14.81	67.2973	21.4444	100	100	0.198632	0.0721357	0.263084	0.173888	0.221087	0.985013	0.134248	0.633897	0.765052	-0.0198328	0.863455	0.825812	0.103154	0.0975257	0.366928
TAG 54:7	TAG	RP_PosMSMS_1322, 1331		Y	GL	TG 16:0_18:2_20:5 M+NH4 Atlas --- TG 16:1_18:2_20:4 M+NH4 Atlas --- TG 18:1_18:3_18:3 M+NH4 Atlas --- TG 18:2_18:2_18:3 M+NH4 Atlas, TG 16:0_18:2_20:5 M+Na Atlas --- TG 18:1_18:3_18:3 M+Na Atlas --- TG 18:2_18:2_18:3 M+Na Atlas	Lipids and lipid-like molecules	Glycerolipids	Triradylcglycerols	HMDB0010490, HMDB0048760, HMDB0050174, HMDB0044273	TG(18:2(9Z,12Z)/18:2(9Z,12Z)/18:3(9Z,12Z,15Z)) --- TG(16:0/18:2(9Z,12Z)/20:5(5Z,8Z,11Z,14Z,17Z)) --- TG(16:1(9Z)/18:2(9Z,12Z)/20:4(8Z,11Z,14Z,17Z)) --- TG(18:1(9Z)/18:3(9Z,12Z,15Z)/18:3(9Z,12Z,15Z))	Glycerolipids [GL]	Triradylglycerols [GL03]	Triacylglycerols [GL0301]	LMGL03010419 --- LMGL03010420 --- LMGL03010451	TG(16:0/18:2(9Z,12Z)/20:5(5Z,8Z,11Z,14Z,17Z))[iso6] --- TG(18:1(9Z)/18:3(9Z,12Z,15Z)/18:3(9Z,12Z,15Z))[iso3] --- TG(18:2(9Z,12Z)/18:2(9Z,12Z)/18:3(9Z,12Z,15Z))[iso3]	TG 54:7	TG 16:0_18:2_20:5 --- TG 18:1_18:3_18:3 --- TG 18:2_18:2_18:3	NGPHUAVENUDDAO-JZRYOQFWNA-N, NSPUDLQBMLPYGF-KXXVTNCTNA-N, PRMRBZVOTCJWQD-XCQZEREDNA-N, RTHDUZGGPUMUEU-HSCVSFFSNA-N, NGPHUAVENUDDAO-JZRYOQFWNA-N, NSPUDLQBMLPYGF-KXXVTNCTNA-N, RTHDUZGGPUMUEU-HSCVSFFSNA-N	C57H96O6	1	M+NH4, M+Na	894.7469, 899.7053		10.18	10.165	75.2688	12.1697	98.4733	100	0.204124	0.0734013	0.266327	-0.0459847	0.754721	0.993093	0.181223	0.533198	0.765052	-0.103304	0.384579	0.676226	0.0647523	0.315685	0.47664
PC 36:5	PC	RP_Pos, RP_NegMSMS_955, 1028, 612		Y	nonGL	PC 16:0_20:5 M+H Atlas --- PC 18:2_18:3 M+H Atlas, PC 36:5 M+Na Atlas, PC 16:0_20:5 M+HCOO Atlas	Lipids and lipid-like molecules	Glycerophospholipids	Glycerophosphocholines	HMDB0007984, HMDB0008141	PC(16:0/20:5(5Z,8Z,11Z,14Z,17Z)) --- PC(18:2(9Z,12Z)/18:3(9Z,12Z,15Z))	Glycerophospholipids [GP]	Glycerophosphocholines [GP01]	Diacylglycerophosphocholines [GP0101]	LMGP01010633 --- LMGP01011626, LMGP01011626, LMGP01010633	PC(16:0/20:5(5Z,8Z,11Z,14Z,17Z)) --- PC(18:2(9Z,12Z)/18:3(9Z,12Z,15Z)), PC(18:2(9Z,12Z)/18:3(9Z,12Z,15Z)), PC(16:0/20:5(5Z,8Z,11Z,14Z,17Z))	PC 36:5	PC 16:0_20:5 --- PC 18:2_18:3, PC 18:2_18:3, PC 16:0_20:5	HZGAVPNEGHQJID-OFWSBFIXNA-N, KLTHQSWIRFFBRI-KOQZQRJKNA-N, HZGAVPNEGHQJID-OFWSBFIXNA-N, TZLKMDUEEBOKMR-MFPUCXCHNA-N, KLTHQSWIRFFBRI-KOQZQRJKNA-N	C44H78NO8P	1, 2	M+H, M+Na, M+HCOO	780.55, 802.5326, 824.5449	480.307	5.45	5.42	92.4731	16.9302	100	100	0.188689	0.0740428	0.267251	0.144842	0.286879	0.985013	0.332848	0.215356	0.765052	-0.0457318	0.678228	0.785957	0.104203	0.0797792	0.363249
Quinoline --- Isoquinoline	Quinolines and derivatives	HILIC_PosMSMS_157			nonGL	Isoquinoline M+H HMDB --- Quinoline M+H HMDB	Organoheterocyclic compounds	Quinolines and derivatives --- Isoquinolines and derivatives		HMDB0033731, HMDB0034244	Quinoline --- Isoquinoline								AWJUIBRHMBBTKR-UHFFFAOYSA-N, SMWDFEZZVXVKRB-UHFFFAOYSA-N	C9H7N	1	M+H	130.064		10.84	10.84	97.5676	15.1795	100	100	0.194535	0.074416	0.267251	-0.0716766	0.610461	0.993093	0.16002	0.565108	0.765052	-0.0326888	0.773949	0.807526	0.0557051	0.366975	0.499067
TAG 26:0	TAG	RP_PosMSMS, MS1_386, 392		Y	GL	LDGTS 19:0 M+H Atlas --- TG 8:0_8:0_10:0 M+NH4 Atlas --- TG 8:0_9:0_9:0 M+NH4 Atlas, TG 8:0_8:0_10:0 M+Na Atlas --- TG 8:0_9:0_9:0 M+Na Atlas	Lipids and lipid-like molecules	Glycerolipids	Triradylcglycerols	HMDB0072193, HMDB0072251	TG(10:0/8:0/8:0) --- TG(8:0/8:0/10:0)								DGVQJAXPGZQOJQ-UHFFFAOYNA-N, LQGWTUVUCVOFTN-UHFFFAOYNA-N, OXBFEJBBKCRANO-UHFFFAOYNA-N, DGVQJAXPGZQOJQ-UHFFFAOYNA-N, OXBFEJBBKCRANO-UHFFFAOYNA-N	C29H54O6	1	M+H --- M+NH4, M+Na	516.4239, 521.3789		5.395	5.39	29.8387	15.3004	72.5191	100	-0.198645	0.0747993	0.267251	-0.19823	0.166468	0.985013	-0.164527	0.562935	0.765052	0.0886862	0.445424	0.698434	-0.109354	0.081546	0.363249
L,L-Cyclo(leucylprolyl)	Amino acids, peptides, and analogues	HILIC_PosMSMS_531			nonGL	Cyclo(Leu-Pro) M+H FiehnHILIC --- L,L-Cyclo(leucylprolyl) M+H HMDB	Organic acids and derivatives	Carboxylic acids and derivatives	Amino acids, peptides, and analogues	HMDB0034276	L,L-Cyclo(leucylprolyl)								SZJNCZMRZAUNQT-IUCAKERBSA-N, SZJNCZMRZAUNQT-UHFFFAOYNA-N	C11H18N2O2	1	M+H	211.144		1.3	1.3	76.2162	28.6364	33.8346	100	0.19617	0.0755446	0.267251	0.132341	0.352062	0.985013	0.236662	0.400183	0.765052	0.105117	0.360649	0.67255	0.0994087	0.110178	0.377594
TAG 55:10	TAG	RP_PosMS1_1337		Y	GL	DGGA 15:0_27:0 M+NH4 Atlas --- DGGA 16:0_26:0 M+NH4 Atlas --- DGGA 17:0_25:0 M+NH4 Atlas --- DGGA 18:0_24:0 M+NH4 Atlas --- DGGA 19:0_23:0 M+NH4 Atlas --- DGGA 20:0_22:0 M+NH4 Atlas --- DGGA 21:0_21:0 M+NH4 Atlas --- TG 10:0_13:1_32:9 M+NH4 Atlas --- TG 11:0_16:3_28:7 M+NH4 Atlas --- TG 11:0_16:4_28:6 M+NH4 Atlas --- TG 11:0_18:3_26:7 M+NH4 Atlas --- TG 11:0_18:4_26:6 M+NH4 Atlas --- TG 11:0_18:5…	Lipids and lipid-like molecules	Glycerolipids	Triradylcglycerols	HMDB0043683, HMDB0043739	TG(15:0/18:4(6Z,9Z,12Z,15Z)/22:6(4Z,7Z,10Z,13Z,16Z,19Z)) --- TG(15:0/20:5(5Z,8Z,11Z,14Z,17Z)/20:5(5Z,8Z,11Z,14Z,17Z))	Glycerolipids [GL]	Triradylglycerols [GL03]	Triacylglycerols [GL0301]	LMGL03010746 --- LMGL03012918 --- LMGL03014107 --- LMGL03015235 --- LMGL03015570 --- LMGL03015585 --- LMGL03016024	TG(13:0/20:5(5Z,8Z,11Z,14Z,17Z)/22:5(7Z,10Z,13Z,16Z,19Z))[iso6] --- TG(15:0/18:4(6Z,9Z,12Z,15Z)/22:6(4Z,7Z,10Z,13Z,16Z,19Z))[iso6] --- TG(15:0/20:5(5Z,8Z,11Z,14Z,17Z)/20:5(5Z,8Z,11Z,14Z,17Z))[iso3] --- TG(15:1(9Z)/18:3(9Z,12Z,15Z)/22:6(4Z,7Z,10Z,13Z,16Z,19Z))[iso6] --- TG(15:1(9Z)/18:4(6Z,9Z,12Z,15Z)/22:5(7Z,10Z,13Z,16Z,19Z))[iso6] --- TG(17:1(9Z)/18:4(6Z,9Z,12Z,15Z)/20:5(5Z,8Z,11Z,14Z,17Z))[iso6…	TG 55:10	TG 13:0_20:5_22:5 --- TG 15:0_18:4_22:6 --- TG 15:0_20:5_20:5 --- TG 15:1_18:3_22:6 --- TG 15:1_18:4_22:5 --- TG 17:1_18:4_20:5 --- TG 17:2_18:3_20:5	AONLVBPDEJXUSZ-FVPWRIEQNA-N, APEFIEPVANKKAU-XTQULDBINA-N, ASHOAAAIVOYOHU-SDRAIUKUNA-N, AXFQNSITNSDDJO-SDFMNNIDNA-N, BBYSGUCNDLVYLR-IUVGNZPTNA-N, BGNBUZLKTGQBNC-QNASFEOMNA-N, BHZRDORMXPOVDH-ZNMRTMOUNA-N, BNWLWXOONZPFOB-DBWZNHQFNA-N, BUXDUTPLXBKQNK-LCQPGIAINA-N, CAICYWGWROITDJ-VNTDCCHZNA-N, COFHQKMQZVBXOA-YEGXZIOQNA-N, COURCTKQFVOBMZ-SCDQLKOUNA-N, COYLYHDCONLGTP-MBQMNJGKNA-N, CRDACMCTWDEWNA-SPXVZEO…	C58H92O6	1	M+NH4	902.723		10.45	10.44	95.6989	13.0389	100	100	0.201404	0.0759258	0.267251	-0.0552254	0.706121	0.993093	0.325368	0.259863	0.765052	-0.130877	0.267756	0.640907	0.0692258	0.280886	0.463424
PC O-42:3	PC-O	RP_PosMSMS_1196		Y	nonGL	PC O-42:3 M+H Atlas													QAJRFFUHENEZQE-RTJPTYSYNA-N	C50H96NO7P	1	M+H	854.693		8.57	8.57	45.4301	9.86446	73.2824	100	-0.198491	0.0762095	0.267251	0.0156929	0.913534	0.998614	-0.259197	0.363421	0.765052	-0.247112	0.0324331	0.414557	-0.0726687	0.250998	0.444224
TAG 54:9	TAG	RP_PosMSMS_1307, 1324		Y	GL	TG 18:3_18:3_18:3 M+NH4 Atlas, TG 18:3_18:3_18:3 M+Na Atlas	Lipids and lipid-like molecules	Glycerolipids	Triradylcglycerols	HMDB0055309	TG(18:3(9Z,12Z,15Z)/18:3(9Z,12Z,15Z)/18:3(9Z,12Z,15Z))	Glycerolipids [GL]	Triradylglycerols [GL03]	Triacylglycerols [GL0301]	LMGL03010527	TG(18:3(9Z,12Z,15Z)/18:3(9Z,12Z,15Z)/18:3(9Z,12Z,15Z))	TG 54:9	TG 18:3_18:3_18:3	UBEIMDKGOYBUKT-FLIQGJDUSA-N	C57H92O6	1	M+NH4, M+Na	890.7175, 895.6763		9.56	9.57	24.4624	20.8221	68.7023	99.1228	0.199789	0.0764533	0.267251	0.0906176	0.533279	0.985013	0.21479	0.454975	0.765052	-0.00271216	0.981619	0.841471	0.0914174	0.150939	0.401005
CAR 18:0	CAR	RP_PosMSMS_273		Y	nonGL	CAR 18:0 M Atlas														C25H50NO4	1	M	428.371		3.34	3.33	80.914	20.0712	84.7328	100	0.18751	0.0766778	0.267251	0.114581	0.401252	0.985013	0.157497	0.559912	0.765052	-0.088877	0.420731	0.695343	0.0893243	0.134978	0.388039
Pseudouridine	Other nucleosides, nucleotides, and analogues	HILIC_Pos, HILIC_NegMSMS_659, 402			nonGL	Pseudouridine M+H HMDB, Pseudouridine M-H FiehnHILIC --- Pseudouridine M-H HMDB	Nucleosides, nucleotides, and analogues	Nucleoside and nucleotide analogues		HMDB0000767	Pseudouridine								PTJWIQPHWPFNBW-GBNDHIKLSA-N, PTJWIQPHWPFNBW-GBNDHIKLSA-N, PTJWIQPHWPFNBW-UHFFFAOYNA-N	C9H12N2O6	1	M+H, M-H	245.077, 243.062		9.79	9.79	99.187	10.3477	100	100	-0.192562	0.077556	0.268987	-0.226164	0.106021	0.985013	-0.451746	0.102468	0.765052	0.260631	0.0203544	0.350248	-0.127008	0.0380554	0.320417
PC 38:3	PC	RP_Neg, RP_PosMSMS_678, 1066, 1131		Y	nonGL	PC 18:0_20:3 M+HCOO Atlas, PC 18:0_20:3 M+H Atlas --- PC 19:1_19:2 M+H Atlas, PC 38:3 M+Na Atlas													LLUINWFQEIMZRU-JOIBFBEQNA-N, LLUINWFQEIMZRU-JOIBFBEQNA-N, QGDMTUACOSTPAQ-BQYGSISONA-N, AXZPTOGMSDZDHV-WZUSAPNINA-N, QGDMTUACOSTPAQ-BQYGSISONA-N	C46H86NO8P	2, 1	M+HCOO, M+H, M+Na	856.6069, 812.6107, 834.5943	512.32	6.8	6.77	84.1398	20.7531	99.2366	100	0.199708	0.0782959	0.269899	0.127646	0.382446	0.985013	0.411492	0.153144	0.765052	-0.0299203	0.800452	0.813146	0.108259	0.0901635	0.363954
PE 40:6	PE	RP_Pos, RP_NegMSMS_992, 1072, 515		Y	nonGL	1-Octadecanoyl-2-(4Z,7Z,10Z,13Z,16Z,19Z-docosahexaenoyl)-sn-glycero-3-phosphoethanolamine M+H NIST --- PE 38:3 M+Na Atlas, PE 40:6 M+Na Atlas, PE 18:0_22:6 M-H Atlas	Lipids and lipid-like molecules	Glycerophospholipids	Glycerophosphoethanolamines	HMDB0009012	PE(18:0/22:6(4Z,7Z,10Z,13Z,16Z,19Z))	Glycerophospholipids [GP]	Glycerophosphoethanolamines [GP02]	Diacylglycerophosphoethanolamines [GP0201]	LMGP02010094	PE(18:0/22:6(4Z,7Z,10Z,13Z,16Z,19Z))	PE 40:6	PE 18:0_22:6	BQQSMVONYWWRFZ-LJURNQLPNA-N, XYYHNDVKALDFHQ-OXHZBIAZSA-N, NTNFZBHLIDLDET-CWBKFRHXNA-N, XYYHNDVKALDFHQ-HSBBONCLNA-N	C45H78NO8P	2	M+H --- M+Na, M+Na, M-H	792.55, 814.5306, 790.5398	651.5289, 673.5166, 327.2287	6.35	6.32	77.628	25.6764	99.2366	100	0.188875	0.0805112	0.269899	-0.0249306	0.858146	0.993093	-0.00847513	0.975488	0.782875	0.0548322	0.626648	0.785372	0.0546164	0.372001	0.501635
PC O-38:2	PC-O	RP_NegMS1_655		Y	nonGL	PC O-10:0_28:2 M+HCOO Atlas --- PC O-11:0_26:2 M+CH3COO Atlas --- PC O-12:0_26:2 M+HCOO Atlas --- PC O-13:0_24:2 M+CH3COO Atlas --- PC O-13:1_24:1 M+CH3COO Atlas --- PC O-14:0_24:2 M+HCOO Atlas --- PC O-14:1_24:1 M+HCOO Atlas --- PC O-15:0_22:2 M+CH3COO Atlas --- PC O-15:1_22:1 M+CH3COO Atlas --- PC O-16:0_21:2 M+CH3COO Atlas --- PC O-16:0_22:2 M+HCOO Atlas --- PC O-16:1_21:1 M+CH3COO Atlas --- P…	Lipids and lipid-like molecules	Glycerophospholipids	Glycerophosphocholines	HMDB0013431, HMDB0013436	PC(O-18:1(9Z)/20:1(11Z)) --- PC(O-18:2(9Z,12Z)/20:0)	Glycerophospholipids [GP]	Glycerophosphocholines [GP01]	1-alkyl,2-acylglycerophosphocholines [GP0102]	LMGP01020191 --- LMGP01020210 --- LMGP01020225 --- LMGP01020228 --- LMGP01020266 --- LMGP01020271	PC(O-16:0/22:2(13Z,16Z)) --- PC(O-18:0/20:2(11Z,14Z)) --- PC(O-18:1(9Z)/20:1(11Z)) --- PC(O-18:2(9Z,12Z)/20:0) --- PC(O-20:0/17:2(9Z,12Z)) --- PC(O-20:0/18:2(9Z,12Z))	PC O-37:2 --- PC O-38:2	PC O-16:0/22:2 --- PC O-18:0/20:2 --- PC O-18:1/20:1 --- PC O-18:2/20:0 --- PC O-20:0/17:2 --- PC O-20:0/18:2	AECCLFDSTMPMMB-GFMRDNFCNA-N, AEPMFNJTWDFHBT-OWBHPGMINA-N, AFHLXHSWCOTJPU-LTXDKZCQNA-N, ANWGTBZJTNHIKQ-WRBBJXAJNA-N, ARESNMYKPTUBDT-VYEFPUSRNA-N, AYLZJDUZGUUNKL-OHNCOSGTNA-N, BCUKTVMBUICSAK-AKMCNLDWNA-N, BFJPUTHYBSMDCT-PEZBUJJGNA-N, BOTWJLMICVABNO-KSWDIIKGNA-N, BWKSXRCDEIAKPB-RYKNKZFFNA-N, BYOHTPLHKSDAND-BRBBRKRXNA-N, CDMVURISGBHHSZ-WMPICOGJNA-N, CJQHBZFHJNMNJF-SXAUZNKPNA-N, CLUDCBMDJDYMSZ-IUFKAHD…	C45H88NO7P, C46H90NO7P	1	M+CH3COO --- M+HCOO --- M-H	844.644		7.55	7.54	61.9946	21.5623	99.2366	100	-0.190718	0.0808401	0.269899	-0.137112	0.329706	0.985013	-0.310646	0.263707	0.765052	-0.0517198	0.649912	0.785372	-0.102257	0.0965764	0.365917
dUTP	Pyrimidine deoxyribonucleotides	HILIC_NegMS1_1024			nonGL	Deoxyuridine triphosphate M-H HMDB	Nucleosides, nucleotides, and analogues	Pyrimidine nucleotides	Pyrimidine deoxyribonucleotides	HMDB0001191	Deoxyuridine triphosphate								AHCYMLUZIRLXAA-SHYZEUOFSA-N	C9H15N2O14P3	1	M-H	466.968		6.98	7.01	11.6531	16.9006	32.3308	92.9825	-0.197236	0.0809823	0.269899	0.0452992	0.756127	0.993093	-0.166133	0.564358	0.765052	-0.0801167	0.496517	0.723662	-0.0619569	0.332721	0.482641
TAG 57:11	TAG	RP_PosMS1_1404		Y	GL	DGGA 18:0_26:1 M+NH4 Atlas --- DGGA 20:0_24:1 M+NH4 Atlas --- DGGA 22:0_22:1 M+NH4 Atlas --- DGGA 23:0_21:1 M+NH4 Atlas --- DGGA 24:0_20:1 M+NH4 Atlas --- DGGA 25:0_19:1 M+NH4 Atlas --- DGGA 26:0_18:1 M+NH4 Atlas --- DGGA 27:0_17:1 M+NH4 Atlas --- TG 11:0_16:3_30:8 M+NH4 Atlas --- TG 11:0_16:4_30:7 M+NH4 Atlas --- TG 11:0_18:4_28:7 M+NH4 Atlas --- TG 11:0_18:5_28:6 M+NH4 Atlas --- TG 11:0_20:4_26…	Lipids and lipid-like molecules	Glycerolipids	Triradylcglycerols	HMDB0043741	TG(15:0/20:5(5Z,8Z,11Z,14Z,17Z)/22:6(4Z,7Z,10Z,13Z,16Z,19Z))	Glycerolipids [GL]	Triradylglycerols [GL03]	Triacylglycerols [GL0301]	LMGL03011168 --- LMGL03011387 --- LMGL03014136 --- LMGL03015327 --- LMGL03015677 --- LMGL03016032 --- LMGL03016110	TG(13:0/22:5(7Z,10Z,13Z,16Z,19Z)/22:6(4Z,7Z,10Z,13Z,16Z,19Z))[iso6] --- TG(15:0/20:5(5Z,8Z,11Z,14Z,17Z)/22:6(4Z,7Z,10Z,13Z,16Z,19Z))[iso6] --- TG(15:1(9Z)/20:5(5Z,8Z,11Z,14Z,17Z)/22:5(7Z,10Z,13Z,16Z,19Z))[iso6] --- TG(17:1(9Z)/18:4(6Z,9Z,12Z,15Z)/22:6(4Z,7Z,10Z,13Z,16Z,19Z))[iso6] --- TG(17:1(9Z)/20:5(5Z,8Z,11Z,14Z,17Z)/20:5(5Z,8Z,11Z,14Z,17Z))[iso3] --- TG(17:2(9Z,12Z)/18:3(9Z,12Z,15Z)/22:6(4Z,7…	TG 57:11	TG 13:0_22:5_22:6 --- TG 15:0_20:5_22:6 --- TG 15:1_20:5_22:5 --- TG 17:1_18:4_22:6 --- TG 17:1_20:5_20:5 --- TG 17:2_18:3_22:6 --- TG 17:2_18:4_22:5	AEJUNCAWTIMNDX-VIYSHAHNNA-N, BCFLIYMMYUNOMR-JPFARBKLNA-N, BGLOMFIHEQQTFF-OGRALKHENA-N, BIBFGCFOXDOYRK-APGYTCESNA-N, BKAHLMMQQAEVBF-OOAXWGSJNA-N, BKTRNATYZIJPSH-IMRQLAEWNA-N, BQDICMODFXLECN-IOQDQLDYNA-N, BTXWZTHQFCSBEA-XHGSFUHHNA-N, BYECXWHLJUAVER-TWJWZTBNNA-N, CECJWEBKPLNFQM-ZOXDXHMKNA-N, CGFKFTHJIDNZHR-YGUWVDAVNA-N, CLQBVCASJCVXOF-AACKMNFXNA-N, CXDCIBVBSSLGEK-YBFHQSEGNA-N, DHVDEHQVCJBZCZ-MIAZLBD…	C60H94O6	1	M+NH4	928.739		10.59	10.57	92.2043	4.62753	100	100	0.193876	0.0810677	0.269899	0.0823204	0.565732	0.988506	0.0967442	0.732968	0.765052	-0.115245	0.31919	0.654154	0.0821107	0.19082	0.428791
FA 20:2;O3	FA - Eicosanoids	RP_PosMS1_113		Y	nonGL	9S,11R,15S-Trihydroxy-5Z-prostenoic acid M+H NIST						Fatty Acyls [FA]	Eicosanoids [FA03]	Prostaglandins [FA0301]	LMFA03010079	13,14-dihydro-PGF2alpha	FA 20:2;O3		LLQBSJQTCKVWTD-NFUXFLSFSA-N	C20H36O5	1	M+H	357.26		2.4	2.4	22.3118	20.3842	47.3282	100	0.194276	0.0811331	0.269899	0.204815	0.152167	0.985013	0.253261	0.372042	0.765052	-0.176058	0.127662	0.524365	0.113625	0.0697915	0.352576
TAG 57:9	TAG	RP_PosMS1_1412		Y	GL	TG 10:0_11:0_36:9 M+NH4 Atlas --- TG 10:0_13:0_34:9 M+NH4 Atlas --- TG 10:0_13:1_34:8 M+NH4 Atlas --- TG 10:0_15:0_32:9 M+NH4 Atlas --- TG 10:0_15:1_32:8 M+NH4 Atlas --- TG 10:0_17:1_30:8 M+NH4 Atlas --- TG 10:0_17:2_30:7 M+NH4 Atlas --- TG 10:0_19:2_28:7 M+NH4 Atlas --- TG 10:0_21:2_26:7 M+NH4 Atlas --- TG 11:0_12:0_34:9 M+NH4 Atlas --- TG 11:0_14:0_32:9 M+NH4 Atlas --- TG 11:0_14:1_32:8 M+NH4 A…	Lipids and lipid-like molecules	Glycerolipids	Triradylcglycerols	HMDB0043711	TG(15:0/20:4(8Z,11Z,14Z,17Z)/22:5(7Z,10Z,13Z,16Z,19Z))	Glycerolipids [GL]	Triradylglycerols [GL03]	Triacylglycerols [GL0301]	LMGL03011022 --- LMGL03011225 --- LMGL03011226 --- LMGL03011230 --- LMGL03011231 --- LMGL03011232 --- LMGL03014133 --- LMGL03015651 --- LMGL03015675 --- LMGL03015948 --- LMGL03016108 --- LMGL03016531 --- LMGL03016560	TG(13:0/22:3(10Z,13Z,16Z)/22:6(4Z,7Z,10Z,13Z,16Z,19Z))[iso6] --- TG(15:1(9Z)/20:2(11Z,14Z)/22:6(4Z,7Z,10Z,13Z,16Z,19Z))[iso6] --- TG(15:1(9Z)/20:5(5Z,8Z,11Z,14Z,17Z)/22:3(10Z,13Z,16Z))[iso6] --- TG(17:0/18:3(9Z,12Z,15Z)/22:6(4Z,7Z,10Z,13Z,16Z,19Z))[iso6] --- TG(17:0/18:4(6Z,9Z,12Z,15Z)/22:5(7Z,10Z,13Z,16Z,19Z))[iso6] --- TG(17:1(9Z)/18:2(9Z,12Z)/22:6(4Z,7Z,10Z,13Z,16Z,19Z))[iso6] --- TG(17:1(9Z)/…	TG 57:9	TG 13:0_22:3_22:6 --- TG 15:1_20:2_22:6 --- TG 15:1_20:5_22:3 --- TG 17:0_18:3_22:6 --- TG 17:0_18:4_22:5 --- TG 17:1_18:2_22:6 --- TG 17:1_18:3_22:5 --- TG 17:2_18:1_22:6 --- TG 17:2_18:2_22:5 --- TG 17:2_18:4_22:3 --- TG 17:2_20:2_20:5 --- TG 18:3_19:1_20:5 --- TG 18:4_19:0_20:5	ADOKISBOQYFYBH-DQQBBUAWNA-N, AEWSIDAWDBWBLX-ZLSOYGQMNA-N, ALKDDOLYENAJMX-PNTSLDLQNA-N, ANNOGOUUGYSYGE-YCNOZGDKNA-N, ASTITCQLXUUPSP-JFXVRDLLNA-N, AUPSAVWLAOORAU-FQXYQIEMNA-N, AYVWVUAXQUJBTE-QECSQYDQNA-N, BAHLSQVUKALSST-BGTDBOQINA-N, BBWAOIUPXLLOCM-HNKTUWGBNA-N, BFYDFHCRAYELGK-AKNQOETGNA-N, BJAWXDNFBNTHFB-AJRFDAMRNA-N, BLESSVQNWAPQBI-IPFGULTHNA-N, BLEZUTJFPAFZTA-QJHVXARKNA-N, BPLTXPWEEFHSRH-HVCPQTI…	C60H98O6	1	M+NH4	932.77		11.04	11.02	91.6667	19.2635	100	100	0.18814	0.0818703	0.269899	-0.00245316	0.985976	0.998614	0.0884809	0.748431	0.765052	-0.0532669	0.636705	0.785372	0.0635135	0.299097	0.469318
PI O-37:1	PI-O	RP_NegMS1_694		Y	nonGL	PI O-11:0_26:1 M-H Atlas --- PI O-13:0_24:1 M-H Atlas --- PI O-13:1_24:0 M-H Atlas --- PI O-14:1_23:0 M-H Atlas --- PI O-15:0_22:1 M-H Atlas --- PI O-15:1_22:0 M-H Atlas --- PI O-16:0_21:1 M-H Atlas --- PI O-16:1_21:0 M-H Atlas --- PI O-17:0_20:1 M-H Atlas --- PI O-17:1_20:0 M-H Atlas --- PI O-18:0_19:1 M-H Atlas --- PI O-18:1_19:0 M-H Atlas --- PI O-19:0_18:1 M-H Atlas --- PI O-19:1_18:0 M-H Atl…						Glycerophospholipids [GP]	Glycerophosphoinositols [GP06]	1-alkyl,2-acylglycerophosphoinositols [GP0602]	LMGP06020034 --- LMGP06020050	PI(O-18:0/19:1(9Z)) --- PI(O-20:0/17:1(9Z))	PI O-37:1	PI O-18:0/19:1 --- PI O-20:0/17:1	ARFUOCJHJSRGIB-HNENSFHCNA-N, BVGUYSTVUCCVMK-ZPHPHTNENA-N, CBBKZCSHXCCLOF-VXPUYCOJNA-N, CKZURXAXLJLTSU-VXPUYCOJNA-N, CXRKMMQINWSYCX-ZCXUNETKNA-N, DDBGJJBADTVERT-ZCXUNETKNA-N, HOOHFBZUJLVRBI-VLGSPTGONA-N, IEWCAZFUOCMUDU-NTMALXAHNA-N, JAHCXKSEOWIINY-UZYVYHOENA-N, KZWAAVYGHBNLGF-BENRWUELNA-N, LHRAHDUZBDGGOS-HNENSFHCNA-N, LKAZKCYWVNMMEJ-PEZBUJJGNA-N, LZKZDINKFPQRHI-ZCXUNETKNA-N, NAKJMCYGSCHZLD-NTMALXA…	C46H89O12P	1	M-H	863.601		6.18	6.19	11.3208	27.1391	30.5344	99.1228	-0.199639	0.0824054	0.269899	-0.146011	0.323815	0.985013	-0.0487171	0.868084	0.769105	-0.0616794	0.606853	0.779737	-0.0938645	0.147789	0.400433
TAG 61:5	TAG	RP_PosMS1_1535		Y	GL	TG 10:0_13:0_38:5 M+NH4 Atlas --- TG 10:0_13:1_38:4 M+NH4 Atlas --- TG 10:0_15:0_36:5 M+NH4 Atlas --- TG 10:0_15:1_36:4 M+NH4 Atlas --- TG 10:0_17:0_34:5 M+NH4 Atlas --- TG 10:0_17:1_34:4 M+NH4 Atlas --- TG 10:0_17:2_34:3 M+NH4 Atlas --- TG 10:0_18:5_33:0 M+NH4 Atlas --- TG 10:0_19:0_32:5 M+NH4 Atlas --- TG 10:0_19:1_32:4 M+NH4 Atlas --- TG 10:0_19:2_32:3 M+NH4 Atlas --- TG 10:0_20:5_31:0 M+NH4 A…	Lipids and lipid-like molecules	Glycerolipids	Triradylcglycerols	HMDB0043748	TG(15:0/22:5(7Z,10Z,13Z,16Z,19Z)/24:0)	Glycerolipids [GL]	Triradylglycerols [GL03]	Triacylglycerols [GL0301]	LMGL03011721 --- LMGL03011722 --- LMGL03011727 --- LMGL03011774 --- LMGL03011779 --- LMGL03011822 --- LMGL03011829 --- LMGL03011862 --- LMGL03011869 --- LMGL03011933 --- LMGL03011958 --- LMGL03012000 --- LMGL03015979 --- LMGL03016723 --- LMGL03016733	TG(17:0/22:0/22:5(7Z,10Z,13Z,16Z,19Z))[iso6] --- TG(17:0/22:2(13Z,16Z)/22:3(10Z,13Z,16Z))[iso6] --- TG(17:1(9Z)/22:1(13Z)/22:3(10Z,13Z,16Z))[iso6] --- TG(17:1(9Z)/22:2(13Z,16Z)/22:2(13Z,16Z))[iso3] --- TG(17:2(9Z,12Z)/22:0/22:3(10Z,13Z,16Z))[iso6] --- TG(17:2(9Z,12Z)/22:1(13Z)/22:2(13Z,16Z))[iso6] --- TG(18:0/21:0/22:5(7Z,10Z,13Z,16Z,19Z))[iso6] --- TG(18:2(9Z,12Z)/21:0/22:3(10Z,13Z,16Z))[iso6] -…	TG 61:5	TG 17:0_22:0_22:5 --- TG 17:0_22:2_22:3 --- TG 17:1_22:1_22:3 --- TG 17:1_22:2_22:2 --- TG 17:2_22:0_22:3 --- TG 17:2_22:1_22:2 --- TG 18:0_21:0_22:5 --- TG 18:2_21:0_22:3 --- TG 18:3_21:0_22:2 --- TG 19:0_20:0_22:5 --- TG 19:0_20:2_22:3 --- TG 19:0_20:5_22:0 --- TG 19:1_20:1_22:3 --- TG 19:1_20:2_22:2 --- TG 20:0_20:5_21:0	AHGCCUPYMHFLNE-DECNVBCVNA-N, AJFIGFCJUKLJGZ-APRPQARHNA-N, ALMCLWDOXBXDHM-MTLGXYTQNA-N, AMPRRZMQTYYOFM-DVFZJWTONA-N, AOTUTFKKMIVSQX-OETNGVFGNA-N, AQAUPAGVBDPMDF-UEEJUZCONA-N, ASEVQEPNSDVOAV-JOLZRBAKNA-N, ASRCGRHOEJRCRP-HOXCXTPVNA-N, ATCPZUPMYYDCEZ-UNJQRGLKNA-N, ATXSOVJXMGCNNO-OHBWSINCNA-N, AUGAOXGSZXTZKU-DUFJGDSJNA-N, AUSHQPXGWZDSJC-LFSVJLMBNA-N, AVXLFTUEJRIPJB-YMFPVCFNNA-N, AYKAKJXTYVPUCZ-RBRKGID…	C64H114O6	1	M+NH4	996.894		12.39	12.37	56.9892	26.3155	75.5725	100	0.192969	0.0824583	0.269899	0.12938	0.36601	0.985013	0.288895	0.307059	0.765052	0.0815267	0.481465	0.716738	0.100402	0.108857	0.376677
TAG 55:8	TAG	RP_PosMS1_1347		Y	GL	TG 10:0_11:0_34:8 M+NH4 Atlas --- TG 10:0_13:0_32:8 M+NH4 Atlas --- TG 10:0_13:1_32:7 M+NH4 Atlas --- TG 10:0_15:0_30:8 M+NH4 Atlas --- TG 10:0_15:1_30:7 M+NH4 Atlas --- TG 10:0_17:1_28:7 M+NH4 Atlas --- TG 10:0_17:2_28:6 M+NH4 Atlas --- TG 10:0_19:1_26:7 M+NH4 Atlas --- TG 10:0_19:2_26:6 M+NH4 Atlas --- TG 10:0_21:2_24:6 M+NH4 Atlas --- TG 11:0_12:0_32:8 M+NH4 Atlas --- TG 11:0_14:0_30:8 M+NH4 A…	Lipids and lipid-like molecules	Glycerolipids	Triradylcglycerols	HMDB0043422, HMDB0043653, HMDB0043709	TG(15:0/18:2(9Z,12Z)/22:6(4Z,7Z,10Z,13Z,16Z,19Z)) --- TG(15:0/18:3(9Z,12Z,15Z)/22:5(7Z,10Z,13Z,16Z,19Z)) --- TG(15:0/20:4(8Z,11Z,14Z,17Z)/20:4(8Z,11Z,14Z,17Z))	Glycerolipids [GL]	Triradylglycerols [GL03]	Triacylglycerols [GL0301]	LMGL03010618 --- LMGL03010619 --- LMGL03010620 --- LMGL03010780 --- LMGL03010782 --- LMGL03010783 --- LMGL03013087 --- LMGL03014081 --- LMGL03014105 --- LMGL03014886 --- LMGL03015184 --- LMGL03015218 --- LMGL03015516 --- LMGL03015534 --- LMGL03015583 --- LMGL03015643 --- LMGL03016100 --- LMGL03016509	TG(13:0/20:2(11Z,14Z)/22:6(4Z,7Z,10Z,13Z,16Z,19Z))[iso6] --- TG(13:0/20:5(5Z,8Z,11Z,14Z,17Z)/22:3(10Z,13Z,16Z))[iso6] --- TG(14:1(9Z)/19:1(9Z)/22:6(4Z,7Z,10Z,13Z,16Z,19Z))[iso6] --- TG(15:0/18:2(9Z,12Z)/22:6(4Z,7Z,10Z,13Z,16Z,19Z))[iso6] --- TG(15:0/18:3(9Z,12Z,15Z)/22:5(7Z,10Z,13Z,16Z,19Z))[iso6] --- TG(15:1(9Z)/18:1(9Z)/22:6(4Z,7Z,10Z,13Z,16Z,19Z))[iso6] --- TG(15:1(9Z)/18:2(9Z,12Z)/22:5(7Z,10Z…	TG 55:8	TG 13:0_20:2_22:6 --- TG 13:0_20:5_22:3 --- TG 14:1_19:1_22:6 --- TG 15:0_18:2_22:6 --- TG 15:0_18:3_22:5 --- TG 15:1_18:1_22:6 --- TG 15:1_18:2_22:5 --- TG 15:1_18:4_22:3 --- TG 15:1_20:2_20:5 --- TG 16:0_17:2_22:6 --- TG 16:1_17:1_22:6 --- TG 16:1_17:2_22:5 --- TG 17:0_18:3_20:5 --- TG 17:1_18:2_20:5 --- TG 17:2_18:1_20:5 --- TG 17:2_18:4_20:2 --- TG 18:3_18:4_19:1 --- TG 18:4_18:4_19:0	AFDYJFBGCNBYEG-FAOHWIOONA-N, AJPASYSQSXPEHF-ZRZRNRPCNA-N, AJRVVRUWAFMGPL-LUMVODSNNA-N, ANMWEJMEIVWFBI-CJDJHPQWNA-N, AVFZEXKQBPHJBM-BKODHHRQNA-N, BDWVGFVJDJXXGP-VEESLZOSNA-N, BEYNXIJKNWZAOS-WEOJKGLVNA-N, BHBQEPAKIOITSW-ZINKQYAWNA-N, BNBNLFXGRPFQAO-KPNHZLSONA-N, BQJFXVULBXLGEK-VJEPQUHJNA-N, BXWQRIWPXNFFDU-WKKORSOWNA-N, BYBLJAMZRLNIDA-YKVXATCMNA-N, BZAPMJSGGBHFRV-ZUYXXMBMNA-N, CALRAQFXNWTLAW-SIRBSTN…	C58H96O6	1	M+NH4	906.754		10.9	10.89	100	7.68009	100	100	0.196893	0.082484	0.269899	-0.0367448	0.80172	0.993093	0.388773	0.177123	0.765052	-0.177588	0.131184	0.536123	0.0744972	0.245113	0.443666
TAG 59:11	TAG	RP_PosMS1_1453		Y	GL	TG 10:0_13:1_36:10 M+NH4 Atlas --- TG 10:0_17:2_32:9 M+NH4 Atlas --- TG 11:0_16:2_32:9 M+NH4 Atlas --- TG 11:0_16:3_32:8 M+NH4 Atlas --- TG 11:0_16:4_32:7 M+NH4 Atlas --- TG 11:0_18:3_30:8 M+NH4 Atlas --- TG 11:0_18:4_30:7 M+NH4 Atlas --- TG 11:0_18:5_30:6 M+NH4 Atlas --- TG 11:0_20:4_28:7 M+NH4 Atlas --- TG 11:0_20:5_28:6 M+NH4 Atlas --- TG 11:0_22:4_26:7 M+NH4 Atlas --- TG 11:0_22:5_26:6 M+NH4 …	Lipids and lipid-like molecules	Glycerolipids	Triradylcglycerols	HMDB0043770	TG(15:0/22:5(7Z,10Z,13Z,16Z,19Z)/22:6(4Z,7Z,10Z,13Z,16Z,19Z))	Glycerolipids [GL]	Triradylglycerols [GL03]	Triacylglycerols [GL0301]	LMGL03011753 --- LMGL03011762 --- LMGL03012979 --- LMGL03013142 --- LMGL03015355 --- LMGL03016582	TG(15:0/22:5(7Z,10Z,13Z,16Z,19Z)/22:6(4Z,7Z,10Z,13Z,16Z,19Z))[iso6] --- TG(15:1(9Z)/22:5(7Z,10Z,13Z,16Z,19Z)/22:5(7Z,10Z,13Z,16Z,19Z))[iso3] --- TG(17:0/20:5(5Z,8Z,11Z,14Z,17Z)/22:6(4Z,7Z,10Z,13Z,16Z,19Z))[iso6] --- TG(17:1(9Z)/20:5(5Z,8Z,11Z,14Z,17Z)/22:5(7Z,10Z,13Z,16Z,19Z))[iso6] --- TG(18:4(6Z,9Z,12Z,15Z)/19:1(9Z)/22:6(4Z,7Z,10Z,13Z,16Z,19Z))[iso6] --- TG(19:1(9Z)/20:5(5Z,8Z,11Z,14Z,17Z)/20:5…	TG 59:11	TG 15:0_22:5_22:6 --- TG 15:1_22:5_22:5 --- TG 17:0_20:5_22:6 --- TG 17:1_20:5_22:5 --- TG 18:4_19:1_22:6 --- TG 19:1_20:5_20:5	AARLKRBVHQJMIF-JDSVWTSQNA-N, AELOKTICLXYFNQ-NCEKVRKXNA-N, ALCDZVLFHOQCHN-RCMQXCEKNA-N, ATLNDDJPRRETRP-WFBACOOVNA-N, ATMNOZKNFRYENV-RTZAWDRXNA-N, AUKOAPIRLREGLL-ZYJYYFTLNA-N, BBNASZJBIBSCCH-VMJXORQONA-N, BRHGQKSOHZTEJG-VNTBBQKDNA-N, BSZPSRVMMAHKDP-XFNXXFNNNA-N, CBLXJBBTTNMEFF-ZTRPFPSONA-N, CERREUSYVFBJEA-FGOGNYNFNA-N, CKYNTHVFPCMQGF-KVBUZQTPNA-N, CMOVYKMUSOPXJW-GVQGDUEQNA-N, CTAPFUIALXWLAL-HZVAWZP…	C62H98O6	1	M+NH4	956.769		10.94	10.92	75.8065	19.4573	94.6565	100	0.190197	0.0825752	0.269899	0.069681	0.621971	0.993093	0.257539	0.355991	0.765052	-0.0738566	0.51786	0.737485	0.0864461	0.162138	0.40357
TAG 51:5	TAG	RP_PosMSMS_1219		Y	GL	TG 10:0_11:0_30:5 M+Na Atlas --- TG 10:0_13:0_28:5 M+Na Atlas --- TG 10:0_13:1_28:4 M+Na Atlas --- TG 10:0_15:0_26:5 M+Na Atlas --- TG 10:0_15:1_26:4 M+Na Atlas --- TG 10:0_17:0_24:5 M+Na Atlas --- TG 10:0_17:1_24:4 M+Na Atlas --- TG 10:0_17:2_24:3 M+Na Atlas --- TG 10:0_18:5_23:0 M+Na Atlas --- TG 10:0_19:0_22:5 M+Na Atlas --- TG 10:0_19:1_22:4 M+Na Atlas --- TG 10:0_19:2_22:3 M+Na Atlas --- TG …	Lipids and lipid-like molecules	Glycerolipids	Triradylcglycerols	HMDB0042118, HMDB0043043, HMDB0043216, HMDB0043273, HMDB0043417	TG(14:0/15:0/22:5(7Z,10Z,13Z,16Z,19Z)) --- TG(15:0/16:0/20:5(5Z,8Z,11Z,14Z,17Z)) --- TG(15:0/16:1(9Z)/20:4(8Z,11Z,14Z,17Z)) --- TG(15:0/18:1(9Z)/18:4(6Z,9Z,12Z,15Z)) --- TG(15:0/18:2(9Z,12Z)/18:3(9Z,12Z,15Z))	Glycerolipids [GL]	Triradylglycerols [GL03]	Triacylglycerols [GL0301]	LMGL03010081 --- LMGL03010105 --- LMGL03010107 --- LMGL03010108 --- LMGL03012961 --- LMGL03013394 --- LMGL03013437 --- LMGL03013558 --- LMGL03013810 --- LMGL03013918 --- LMGL03013989 --- LMGL03014004 --- LMGL03014192 --- LMGL03014287 --- LMGL03014437 --- LMGL03014623 --- LMGL03014735 --- LMGL03014827 --- LMGL03014842 --- LMGL03015022 --- LMGL03015149 --- LMGL03015167 --- LMGL03015480 --- LMGL0301…	TG(12:0/17:0/22:5(7Z,10Z,13Z,16Z,19Z))[iso6] --- TG(12:0/17:2(9Z,12Z)/22:3(10Z,13Z,16Z))[iso6] --- TG(12:0/19:0/20:5(5Z,8Z,11Z,14Z,17Z))[iso6] --- TG(13:0/16:0/22:5(7Z,10Z,13Z,16Z,19Z))[iso6] --- TG(13:0/18:0/20:5(5Z,8Z,11Z,14Z,17Z))[iso6] --- TG(13:0/18:3(9Z,12Z,15Z)/20:2(11Z,14Z))[iso6] --- TG(13:0/18:4(6Z,9Z,12Z,15Z)/20:1(11Z))[iso6] --- TG(14:0/15:0/22:5(7Z,10Z,13Z,16Z,19Z))[iso6] --- TG(14:0…	TG 51:5	TG 12:0_17:0_22:5 --- TG 12:0_17:2_22:3 --- TG 12:0_19:0_20:5 --- TG 13:0_16:0_22:5 --- TG 13:0_18:0_20:5 --- TG 13:0_18:3_20:2 --- TG 13:0_18:4_20:1 --- TG 14:0_15:0_22:5 --- TG 14:0_17:0_20:5 --- TG 14:0_18:4_19:1 --- TG 14:1_15:1_22:3 --- TG 14:1_17:2_20:2 --- TG 14:1_18:3_19:1 --- TG 14:1_18:4_19:0 --- TG 15:0_16:0_20:5 --- TG 15:0_18:1_18:4 --- TG 15:0_18:2_18:3 --- TG 15:1_18:0_18:4 --- TG …	ACCVGSHKRAHRPS-FHWHOTEENA-N, AKZJJZKGJLRMNT-AKCDRULPNA-N, AMKXSAMRTRLEBZ-BUFYRCOINA-N, AMXXNFGRYHWAIZ-UNZGPCCPNA-N, APTIDLJRIZDMGU-WJGKFJHVNA-N, ASJHAZGUSXEGNS-YTTFAOLSNA-N, BCWXVLSXCLXXQA-GRGFZWLANA-N, BDEHTNRLLBFZCS-GMUXAQIUNA-N, BMQUNSANKJFWMY-KMIOZARSNA-N, BPJQDQAVROPYQF-NTMRYDSBNA-N, BUZJVFPJBPHXEY-KMAJXIHVNA-N, BVAWMQRPOZVGMB-ZBJIVRBXNA-N, CDQCUOVUHMARLK-PWSKTLNONA-N, CKUIZBMCRHVGDA-OAZZTAG…	C54H94O6	1	M+Na	861.689		10.15	10.17	68.2796	7.28544	100	100	0.190887	0.0831629	0.269899	0.0546991	0.700362	0.993093	0.136416	0.627331	0.765052	-0.0477167	0.677972	0.785957	0.0777887	0.211379	0.439107
FA 13:1;O2	FA - Fatty Acids and Conjugates	HILIC_Pos, HILIC_NegMS1, MSMS_594, 355		Y	nonGL	1,11-Undecanedicarboxylic acid M+H-H2O NIST, 1,11-Undecanedicarboxylic acid M-H-H2O NIST	Lipids and lipid-like molecules	Fatty Acyls	Fatty acids and conjugates	HMDB0002327	1,11-Undecanedicarboxylic acid	Fatty Acyls [FA]	Fatty Acids and Conjugates [FA01]	Dicarboxylic acids [FA0117]	LMFA01170014	Brassylic acid	FA 13:1;O2		DXNCZXXFRKPEPY-UHFFFAOYSA-N	C13H24O4	1	M+H-H2O, M-H-H2O	227.1645, 225.1492		1.115	1.115	54.7425	18.4093	84.9624	100	0.194423	0.0835605	0.269899	0.174682	0.226639	0.985013	0.254935	0.372985	0.765052	-0.180328	0.121786	0.519961	0.107934	0.0879756	0.363954
PC O-38:5	PC-O	RP_NegMSMS_646	RT_2	Y	nonGL	PC O-18:1_20:4 M+HCOO Atlas						Glycerophospholipids [GP]	Glycerophosphocholines [GP01]	1-alkyl,2-acylglycerophosphocholines [GP0102]	LMGP01020267	PC(O-18:1(9Z)/20:4(8Z,11Z,14Z,17Z))	PC O-38:5	PC O-18:1/20:4	YPEVVVCDYBKGNI-BXHZXWGDNA-N	C46H84NO7P	2	M+HCOO	838.596	492.343	6.33	6.29	62.2642	13.4612	98.4733	100	-0.196943	0.0838499	0.269899	-0.0895144	0.542253	0.985013	-0.340399	0.240004	0.765052	0.0316105	0.790267	0.812519	-0.0965071	0.133056	0.388039
FOH 18:2	Other lipids	HILIC_PosMSMS_691, 788		Y	nonGL	cis,cis-9,12-Octadecadien-1-ol M+H-H2O NIST, cis,cis-9,12-Octadecadien-1-ol M+H NIST						Fatty Acyls [FA]	Fatty alcohols [FA05]		LMFA05000557	(9Z,12Z)-octadecadien-1-ol	FOH 18:2		JXNPEDYJTDQORS-HZJYTTRNSA-N	C18H34O	2	M+H-H2O, M+H	249.2574, 267.268	81.0687, 55.0536	1.24	1.25	100	6.28004	100	100	-0.194883	0.0839313	0.269899	-0.166684	0.250467	0.985013	-0.339557	0.236325	0.765052	0.122939	0.294755	0.653825	-0.110716	0.0810682	0.363249
NAE 20:2	NAE	HILIC_PosMS1_1218		Y	nonGL	NAE 20:2 M+H Atlas						Fatty Acyls [FA]	Fatty amides [FA08]	N-acyl ethanolamides (endocannabinoids) [FA0804]	LMFA08040002	Anandamide (20:2, n-6)	NAE 20:2		MWQCBVWCBTUPDQ-HZJYTTRNSA-N	C22H41NO2	1	M+H	352.32		1.11	1.12	99.1892	28.1782	100	100	0.195165	0.0841312	0.269899	-0.0147407	0.919482	0.998614	0.329589	0.251458	0.765052	0.046256	0.694715	0.791208	0.0752759	0.2385	0.443666
Nicotinamide N-oxide	Pyridines and derivatives	HILIC_PosMSMS_208			nonGL	Nicotinamide N-oxide M+H NIST	Organoheterocyclic compounds	Pyridines and derivatives	Pyridinecarboxylic acids and derivatives	HMDB0002730	Nicotinamide N-oxide								USSFUVKEHXDAPM-UHFFFAOYSA-N	C6H6N2O2	1	M+H	139.049		4.08	4.07	18.1081	12.6653	36.8421	100	0.197858	0.0845997	0.269899	0.0780078	0.598028	0.993093	0.190015	0.515861	0.765052	0.0411389	0.73103	0.799097	0.0871465	0.178472	0.418274
alpha-Tocopherol	Vitamins and cofactors	RP_PosMSMS_277			nonGL	(+)-.alpha.-Tocopherol M+H NIST --- alpha-Tocopherol M+H HMDB	Lipids and lipid-like molecules	Prenol lipids	Quinone and hydroquinone lipids	HMDB0001893	alpha-Tocopherol	Prenol Lipids [PR]	Quinones and hydroquinones [PR02]	Vitamin E [PR0202]	LMPR02020001	alpha-tocopherol			GVJHHUAWPYXKBD-IEOSBIPESA-N	C29H50O2	2	M+H	431.386	165.09	6.02	6	79.3011	14.3167	100	100	0.184839	0.0846855	0.269899	0.0249437	0.856914	0.993093	0.0830887	0.761287	0.765052	-0.111394	0.318135	0.654154	0.0674918	0.265485	0.447903
TAG 49:3	TAG	RP_PosMSMS_1126		Y	GL	TG 15:0_16:1_18:2 M+NH4 Atlas	Lipids and lipid-like molecules	Glycerolipids	Triradylcglycerols	HMDB0043206	TG(15:0/16:1(9Z)/18:2(9Z,12Z))	Glycerolipids [GL]	Triradylglycerols [GL03]	Triacylglycerols [GL0301]	LMGL03015036	TG(15:0/16:1(9Z)/18:2(9Z,12Z))[iso6]	TG 49:3	TG 15:0_16:1_18:2	CQSXCZMDDSQLAG-SWVFECATNA-N	C52H94O6	1	M+NH4	832.734		10.37	10.34	70.1613	9.60273	100	100	0.191526	0.0854557	0.271133	0.0541964	0.70598	0.993093	0.193891	0.494521	0.765052	-0.0180711	0.876399	0.827757	0.0807332	0.199259	0.430857
Gly-Glu	Amino acids, peptides, and analogues	RP_PosMS1_225			nonGL	Amlodipine M+H FiehnHILIC --- Amlodipine M+H HMDB --- Amlodipine M+H NIST --- Ginkgolide A M+H HMDB --- Gly-Glu 2M+H NIST --- Levamisole 2M+H NIST --- N6-2-(4-Aminophenyl)ethyladenosine M+Na NIST --- Tetramisole 2M+H NIST	Organic acids and derivatives	Carboxylic acids and derivatives	Amino acids, peptides, and analogues	HMDB0028840	Glycyl-Glutamate								ATXPVVINCAGPKE-UHFFFAOYSA-N, FPUXKXIZEIDQKW-UHFFFAOYSA-N, HLFSDGLLUJUHTE-SNVBAGLBSA-N, HLFSDGLLUJUHTE-UHFFFAOYSA-N, HTIQEAQVCYTUBX-UHFFFAOYNA-N, HTIQEAQVCYTUBX-UHFFFAOYSA-N, IEFJWDNGDZAYNZ-UHFFFAOYSA-N	C11H12N2S, C20H24O9, C20H25ClN2O5, C7H12N2O5	1	2M+H --- M+H --- M+Na	409.16		0.79	0.79	68.8172	15.5621	100	100	0.193418	0.0863921	0.27288	0.201417	0.164375	0.985013	0.136672	0.634688	0.765052	-0.217891	0.0618028	0.444426	0.106938	0.0922319	0.363954
PE O-38:6	PE-O	RP_Pos, RP_NegMSMS_861, 416		Y	nonGL	PE O-18:2_20:4 M+H Atlas, PE O-18:2_20:4 M-H Atlas													QGMRGDWLZOYPFY-YUPWHRRNNA-N	C43H76NO7P	2	M+H, M-H	750.5399, 748.5292	361.2725, 329.2472	6.29	6.275	69.6237	27.5168	100	100	0.187291	0.0873151	0.27457	0.00459026	0.974094	0.998614	0.117763	0.67337	0.765052	0.0464977	0.683996	0.786097	0.0660511	0.286261	0.463424
Cer 34:1;O3	Cer	HILIC_NegMSMS_1215		Y	nonGL	Cer 22:0;2O/12:1;(2OH) M+HCOO Atlas													XMOJSJFMHWTBLC-LVWGJNHUNA-N	C34H67NO4	1	M+HCOO	598.504		1.65	1.81	28.1843	12.1873	78.1955	100	-0.18056	0.0885692	0.277281	-0.0102054	0.940533	0.998614	-0.266574	0.323205	0.765052	0.117754	0.285686	0.653825	-0.072353	0.22708	0.443666
SPB 18:1;O2 --- NAE 16:0	SPB	RP_PosMSMS_1		Y	nonGL	D-erythro-C18-Sphingosine M+H NIST --- Palmitoyl ethanolamide M+H NIST	Organic nitrogen compounds --- Organic acids and derivatives	Organonitrogen compounds --- Carboximidic acids and derivatives	Amines --- Carboximidic acids	HMDB0000252, HMDB0002100	Sphingosine --- Palmitoylethanolamide	Fatty Acyls [FA] --- Sphingolipids [SP]	Fatty amides [FA08] --- Sphingoid bases [SP01]	N-acyl ethanolamides (endocannabinoids) [FA0804] --- Sphing-4-enines (Sphingosines) [SP0101]	LMFA08040013 --- LMSP01010001	Palmitoyl-EA --- Sphingosine	NAE 16:0 --- SPB 18:1;O2		HXYVTAGFYLMHSO-UHFFFAOYSA-N, WWUZIQQURGPMPG-KRWOKUGFSA-N	C18H37NO2	1	M+H	300.289		3.29	3.3	65.8602	29.9704	58.0153	100	0.183098	0.090524	0.281575	0.227523	0.100734	0.985013	0.380404	0.166012	0.765052	-0.10028	0.373224	0.676013	0.120748	0.0467696	0.336408
LPI 22:6	LPI	HILIC_NegMSMS_1245		Y	nonGL	LPI 22:6 M-H Atlas						Glycerophospholipids [GP]	Glycerophosphoinositols [GP06]	Monoacylglycerophosphoinositols [GP0605]	LMGP06050012	PI(22:6(4Z,7Z,10Z,13Z,16Z,19Z)/0:0)	LPI 22:6	LPI 22:6	CAPHXUZAFHNJAV-KUBAVDMBNA-N	C31H49O12P	1	M-H	643.29		10.71	10.7	66.1247	15.4385	90.9774	100	0.175088	0.0907368	0.281575	0.0956539	0.473252	0.985013	-0.103473	0.695051	0.765052	0.146676	0.172317	0.581462	0.0688426	0.239138	0.443666
N-Acetyl-D-glucosamine	Carbohydrates and carbohydrate conjugates	HILIC_PosMSMS_510, 571			nonGL	N-Acetyl-D-glucosamine M+H-H2O NIST, N-Acetyl-D-glucosamine M+H HMDB --- N-Acetyl-D-glucosamine M+H NIST	Organic oxygen compounds	Organooxygen compounds	Carbohydrates and carbohydrate conjugates	HMDB0000215	N-Acetyl-D-glucosamine								OVRNDRQMDRJTHS-PVFLNQBWSA-N, OVRNDRQMDRJTHS-PVFLNQBWSA-N, OVRNDRQMDRJTHS-RTRLPJTCSA-N	C8H15NO6	1	M+H-H2O, M+H	204.0863, 222.0976		10.52	10.545	78.6486	14.0921	97.7444	100	-0.191403	0.0916063	0.281885	-0.443552	0.00190962	0.923985	-0.1617	0.576078	0.765052	0.181126	0.123665	0.519961	-0.154297	0.0149111	0.250915
Octabenzone	Xenobiotics	RP_PosMSMS_49			nonGL	Octabenzone M+H NIST													QUAMTGJKVDWJEQ-UHFFFAOYSA-N	C21H26O3	2	M+H	327.194	137.021	3.82	3.81	86.828	11.4144	100	100	-0.189452	0.0918477	0.281885	-0.143276	0.32187	0.985013	0.0372324	0.896665	0.769105	0.11095	0.342833	0.669896	-0.085863	0.175801	0.415131
Tetradonium	Xenobiotics	HILIC_PosMSMS_724			nonGL	Tetradonium cation Cat NIST													GLFDLEXFOHUASB-UHFFFAOYSA-N	C17H38N	1	Cat	256.3		0.88	0.88	81.8919	8.88253	100	100	0.190955	0.092032	0.281885	0.0250375	0.864033	0.993093	0.00106449	0.997062	0.787268	-0.0758491	0.520721	0.737485	0.0653963	0.307544	0.473052
Trimethylamine N-oxide	Organic nitrogen compounds	HILIC_PosMS1_269			nonGL	Trimethylamine N-oxide 2M+H NIST	Organic nitrogen compounds	Organonitrogen compounds	Aminoxides	HMDB0000925	Trimethylamine N-oxide								UYPYRKYUKCHHIB-UHFFFAOYSA-N	C3H9NO	1	2M+H	151.148		1.25	1.25	95.9459	24.4444	99.2481	100	-0.189282	0.093153	0.284011	-0.235596	0.10293	0.985013	-0.195982	0.495035	0.765052	0.0711525	0.544737	0.750396	-0.115157	0.0692451	0.352426
FA 19:0	FA - Fatty Acids and Conjugates	HILIC_NegMS1_572		Y	nonGL	FA 19:0 M-H Atlas	Lipids and lipid-like molecules	Fatty Acyls	Fatty acids and conjugates	HMDB0000772	Nonadecanoic acid	Fatty Acyls [FA]	Fatty Acids and Conjugates [FA01]	Straight chain fatty acids [FA0101]	LMFA01010019	Nonadecylic acid	FA 19:0		ISYWECDDZWTKFF-UHFFFAOYSA-N	C19H38O2	1	M-H	297.279		1.25	1.26	67.4797	16.0895	100	100	-0.18306	0.0935289	0.284011	-0.281525	0.0433981	0.985013	-0.0694103	0.803103	0.768914	0.0357144	0.753692	0.80495	-0.115804	0.0589956	0.336408
PE O-36:2	PE-O	RP_Pos, RP_NegMSMS_804, 370		Y	nonGL	PE O-18:1_18:1 M+H Atlas, 1-(1Z-Octadecenyl)-2-(9Z-octadecenoyl)-sn-glycero-3-phosphoethanolamine M-H NIST --- PE O-18:1_18:1 M-H Atlas	Lipids and lipid-like molecules	Glycerophospholipids	Glycerophosphoethanolamines	HMDB0011375	PE(P-18:0/18:1(9Z))	Glycerophospholipids [GP]	Glycerophosphoethanolamines [GP02]	1Z-alkenyl,2-acylglycerophosphoethanolamines [GP0203]	LMGP02030004	PE(P-18:0/18:1(9Z))	PE O-36:2	PE P-18:0/18:1	GHNXVMPBTBKJRP-CLFAGFIQNA-N, GHNXVMPBTBKJRP-CLFAGFIQNA-N, XVYPOHCSLJZFED-QZEVRULJSA-N	C41H80NO7P	1, 2	M+H, M-H	730.5703, 728.5602	281.246	7.365	7.35	68.5484	19.0911	98.4733	100	0.179921	0.0943001	0.285129	0.0416089	0.764159	0.993093	0.132555	0.628702	0.765052	0.125601	0.261259	0.636153	0.0715953	0.238569	0.443666
TAG 52:4	TAG	RP_PosMSMS_1261, 1272		Y	GL	TG 16:0_18:2_18:2 M+NH4 Atlas --- TG 16:1_18:1_18:2 M+NH4 Atlas, TG 16:0_16:0_20:4 M+Na Atlas --- TG 16:0_18:2_18:2 M+Na Atlas --- TG 16:1_18:1_18:2 M+Na Atlas	Lipids and lipid-like molecules	Glycerolipids	Triradylcglycerols	HMDB0005390, HMDB0005440, HMDB0031117, HMDB0043908	TG(16:0/18:2(9Z,12Z)/18:2(9Z,12Z)) --- TG(16:1(9Z)/18:1(9Z)/18:2(9Z,12Z)) --- Glycerol 1,2-di-(9Z,12Z-octadecadienoate) 3-hexadecanoate --- TG(16:0/16:0/20:4(8Z,11Z,14Z,17Z))	Glycerolipids [GL]	Triradylglycerols [GL03]	Triacylglycerols [GL0301]	LMGL03010141 --- LMGL03010142	TG(16:0/18:2(9Z,12Z)/18:2(9Z,12Z))[iso3] --- TG(16:1(9Z)/18:1(9Z)/18:2(9Z,12Z))[iso6]	TG 52:4	TG 16:0_18:2_18:2 --- TG 16:1_18:1_18:2	LXAWUIOWWNQCQA-YBQWMRSQNA-N, WHSWXEYWNPTUPW-KPJCRDJJNA-N, GTEUKLVYQXBQGG-OWRUCQERNA-N, LXAWUIOWWNQCQA-YBQWMRSQNA-N, WHSWXEYWNPTUPW-KPJCRDJJNA-N	C55H98O6	2, 1	M+NH4, M+Na	872.7645, 877.7198	337.27	10.61	10.57	97.8495	9.30382	98.4733	100	0.190427	0.095042	0.285212	-0.107309	0.465227	0.985013	0.0125976	0.965463	0.780735	-0.117874	0.320589	0.655091	0.0402399	0.533341	0.590557
PC 38:5	PC	RP_Pos, RP_NegMSMS_1047, 1119, 671		Y	nonGL	1,2-Di-(9Z-octadecenoyl)-sn-glycero-3-phosphocholine M+Na NIST --- PC 16:0_22:5 M+H Atlas --- PC 18:1_20:4 M+H Atlas, PC 38:5 M+Na Atlas, PC 16:0_22:5 M+HCOO Atlas --- PC 18:1_20:4 M+HCOO Atlas	Lipids and lipid-like molecules	Glycerophospholipids	Glycerophosphocholines	HMDB0000593, HMDB0008115, HMDB0007990	PC(18:1(9Z)/18:1(9Z)) --- PC(16:0/22:5(7Z,10Z,13Z,16Z,19Z)) --- PC(18:1(9Z)/20:4(8Z,11Z,14Z,17Z))	Glycerophospholipids [GP]	Glycerophosphocholines [GP01]	Diacylglycerophosphocholines [GP0101]	LMGP01010647 --- LMGP01010876 --- LMGP01010890 --- LMGP01012165, LMGP01010647 --- LMGP01012165	PC(16:0/22:5(7Z,10Z,13Z,16Z,19Z)) --- PC(18:1(9E)/18:1(9E)) --- PC(18:1(9Z)/18:1(9Z)) --- PC(18:1(9Z)/20:4(8Z,11Z,14Z,17Z)), PC(16:0/22:5(7Z,10Z,13Z,16Z,19Z)) --- PC(18:1(9Z)/20:4(8Z,11Z,14Z,17Z))	PC 36:2 --- PC 38:5, PC 38:5	PC 16:0_22:5 --- PC 18:1/18:1 --- PC 18:1_20:4, PC 16:0_22:5 --- PC 18:1_20:4	ARDJUHDXABDVFH-BPFCGSCHNA-N, SNKAWJBJQDLSFF-YEUCEMRASA-N, SWOKEJBWARJLGN-LTLPGSJDNA-N, NXXPLRWFTSQYFC-NREKDWIXNA-N, ARDJUHDXABDVFH-BPFCGSCHNA-N, SWOKEJBWARJLGN-LTLPGSJDNA-N	C44H84NO8P, C46H82NO8P, C46H82NO8P	1, 2	M+H --- M+Na, M+Na, M+HCOO	808.5781, 830.561, 852.574	329.247	5.92	5.9	91.3978	17.5386	98.4733	100	0.182247	0.0956212	0.285212	0.0624097	0.658029	0.993093	0.137622	0.621519	0.765052	-0.118742	0.296511	0.653825	0.0765995	0.214817	0.442614
Xanthine	Purines and purine derivatives	HILIC_Neg, HILIC_PosMSMS_132, 281			nonGL	Oxypurinol M-H HMDB --- Xanthine M-H HMDB, Phenylthiourea M+H HMDB --- Xanthine M+H HMDB --- Xanthine M+H NIST	Organoheterocyclic compounds	Imidazopyrimidines	Purines and purine derivatives	HMDB0000292	Xanthine								HXNFUBHNUDHIGC-UHFFFAOYSA-N, LRFVTYWOQMYALW-UHFFFAOYSA-N, FULZLIGZKMKICU-UHFFFAOYSA-N, LRFVTYWOQMYALW-UHFFFAOYSA-N	C5H4N4O2, C5H4N4O2, C7H8N2S	1	M-H, M+H	151.0259, 153.0403		7.55	7.56	100	22.9217	100	100	0.18534	0.0964183	0.285212	0.109542	0.445531	0.985013	-0.0747956	0.792474	0.76763	0.237006	0.0393723	0.421321	0.0761899	0.226238	0.443666
Lutein --- Zeaxanthin	Xenobiotics	RP_PosMS1_465	RT_1		nonGL	3'-Deoxycapsanthin; FAB-EBEB; MS2; m/z M MassBank --- Cryptocapsin; FAB-EBEB; MS2; m/z M MassBank --- DGTS 2:0_20:2 M+H Atlas --- DGTS 3:0_19:2 M+H Atlas --- DGTS 4:0_18:2 M+H Atlas --- DGTS 5:0_17:2 M+H Atlas --- DGTS 6:0_16:2 M+H Atlas --- Isozeaxanthin; FAB-EBEB; MS2; m/z M MassBank --- LDGCC 22:3 M+H Atlas --- Lutein; FAB-EBEB; MS2; m/z M MassBank --- Lycopene 1,2,1',2'-diepoxide; FAB-EBEB; M…	Lipids and lipid-like molecules	Prenol lipids	Tetraterpenoids	HMDB0002789, HMDB0003233	Zeaxanthin --- Lutein	Prenol Lipids [PR]	Isoprenoids [PR01]	C40 isoprenoids (tetraterpenes) [PR0107]	LMPR01070049 --- LMPR01070261 --- LMPR01070274 --- LMPR01070709 --- LMPR01070711 --- LMPR01070712 --- LMPR01070714 --- LMPR01070877 --- LMPR01070962	Beta-Carotene diepoxide --- Cryptocapsin --- Cryptoxanthin 5',6'-epoxide --- Cryptoxanthin 5,6-epoxide --- Lutein --- Luteochrome --- Semi-alpha-carotenone --- Semi-beta-carotenone --- Zeaxanthin			BIPAHAFBQLWRMC-DKLMTRRANA-N, CMOLUFWHADIFGS-VESOQFFVSA-N, DCWLOCNJVDYFMA-PAZCZHIKSA-N, GMJHZCBAXBEVTL-USJAUHPMNA-N, GYZWNQLEQAGWGD-DKLMTRRANA-N, HSOIPJLINDKQOV-FOTQGIOVSA-N, HTJLMVXKSJHXPR-XVTLYKPTNA-N, IEYAXVIVXCIGBX-QGLGPCELNA-N, ITZNDVRDABSNRE-VUWSZMCHSA-N, JKQXZKUSFCKOGQ-QAYBQHTQSA-N, JLFOTJPFBATTLK-IUXASYQSSA-N, JMZDCQZKLCHTFI-HPLZOGFXSA-N, KBPHJBAIARWVSC-RGZFRNHPSA-N, LLQCIZOXARRMDO-HGTNRAF…	C40H56O2	1	M --- M+H	568.424		4.12	4.1	63.4409	28.8775	71.7557	100	0.185589	0.0969158	0.285212	0.027701	0.847653	0.993093	0.340453	0.230795	0.765052	-0.158127	0.173022	0.581462	0.0809745	0.199466	0.430857
Cer 32:1;O3	Cer	HILIC_NegMS1_1180		Y	nonGL	Cer 14:0;2O/18:1;(2OH) M+HCOO Atlas --- Cer 14:0;2O/18:1;(3OH) M+HCOO Atlas --- Cer 14:0;3O/18:1 M+HCOO Atlas --- Cer 14:1;2O/17:0;(2OH) M+CH3COO Atlas --- Cer 14:1;2O/17:0;(3OH) M+CH3COO Atlas --- Cer 14:1;2O/18:0;(2OH) M+HCOO Atlas --- Cer 14:1;2O/18:0;(3OH) M+HCOO Atlas --- Cer 14:1;3O/17:0 M+CH3COO Atlas --- Cer 14:1;3O/18:0 M+HCOO Atlas --- Cer 15:0;2O/16:1;(2OH) M+CH3COO Atlas --- Cer 15:0;…						Sphingolipids [SP]	Ceramides [SP02]	N-acylsphingosines (ceramides) [SP0201]	LMSP02010155	Cer(d18:1(4E)/14:0(2OH))	Cer 32:1;O3	Cer 18:1;O2/14:0;O	AFMZLVYDVTYTHS-CZIZESTLNA-N, AOCNYVAZNSWFKY-FMQUCBEENA-N, AZEGMEMOYBIAHV-WJTDDFOZNA-N, BHPCLHZIBZFFGP-SHHOIMCANA-N, BIBWNJJMKKINAT-SHHOIMCANA-N, BIFFEMJJRBNLBP-HTXNQAPBNA-N, CAMZKUPIYHEWEM-CZIZESTLNA-N, CBOZDGVCDMZZJQ-SHHOIMCANA-N, CIHYMZSKWQWZEE-YPKPFQOONA-N, CPPSFVMDXRZASR-ZPHPHTNENA-N, DASQDAKWXWNJMA-HTXNQAPBNA-N, DDTUYDMNPONZEA-WJTDDFOZNA-N, DHXSBALQTZVYNX-QBFSEMIENA-N, DPIHAUCQHRYAIX-NXVVXOE…	C32H63NO4	1	M+CH3COO --- M+HCOO	570.478		1.8	1.81	17.0732	12.4134	47.3684	100	-0.175699	0.0969319	0.285212	-0.0113843	0.933544	0.998614	-0.117017	0.664524	0.765052	0.0701227	0.524843	0.737485	-0.063653	0.287348	0.463424
beta-D-Allose	Xenobiotics	HILIC_NegMSMS_762			nonGL	.beta.-D-Allose 2M-H NIST	Organic oxygen compounds	Organooxygen compounds	Carbohydrates and carbohydrate conjugates	HMDB0001151	Allose								WQZGKKKJIJFFOK-QZABAPFNSA-N	C6H12O6	1	2M-H	359.117		12.52	12.52	53.3875	14.0654	95.4887	100	-0.183109	0.0969389	0.285212	-0.181204	0.200985	0.985013	-0.380376	0.174379	0.765052	0.294697	0.00917495	0.283279	-0.111805	0.0714364	0.358232
ST 21:3;O4	ST - Steroids	RP_PosMS1_94		Y	nonGL	(+)-Calycanthine M+H HMDB --- 6-Dimethylamino-4-ketohexanoic acid 2M+H NIST --- Cortexolone M+H HMDB --- Corticosterone M+H FiehnHILIC --- Corticosterone M+H HMDB --- Corticosterone M+H NIST --- Cortodoxone M+H FiehnHILIC --- Cortodoxone M+H NIST --- Reichsteins Substance S M+H HMDB	Lipids and lipid-like molecules --- Organoheterocyclic compounds	Steroids and steroid derivatives --- Quinolines and derivatives	Hydroxysteroids --- Aminoquinolines and derivatives	HMDB0000015, HMDB0001547, HMDB0029561, HMDB0257139	Cortexolone --- Corticosterone --- (+)-Calycanthine --- Reichsteins Substance S	Sterols [ST]	Steroids [ST02]	C21 steroids (gluco/mineralocorticoids, progestogins) and derivatives [ST0203]	LMST02030086 --- LMST02030186	11-deoxycortisol --- corticosterone	ST 21:3;O4		OMFXVFTZEKFJBZ-HJTSIMOOSA-N, OMFXVFTZEKFJBZ-UHFFFAOYNA-N, VLVLXIOXEMIZTI-UHFFFAOYSA-N, WHBHBVVOGNECLV-OBQKJFGGSA-N, WHBHBVVOGNECLV-UHFFFAOYNA-N, WHBHBVVOGNECLV-UHFFFAOYSA-N, XSYCDVWYEVUDKQ-UHFFFAOYSA-N	C21H30O4, C22H26N4	1	2M+H --- M+H	347.215		3.03	3.04	69.086	26.9922	57.2519	100	-0.187137	0.0977299	0.285212	-0.250314	0.0835785	0.985013	-0.0375661	0.896289	0.769105	0.0964377	0.412386	0.692938	-0.109495	0.0850327	0.363249
Cysteine-S-sulfate	Amino acids, peptides, and analogues	HILIC_NegMSMS_285			nonGL	Cysteine S-sulfate; LC-ESI-QTOF; MS2; CE M-H MassBank --- Cysteine-S-sulfate M-H HMDB --- L-Cysteine S-sulfate M-H NIST	Organic acids and derivatives	Carboxylic acids and derivatives	Amino acids, peptides, and analogues	HMDB0000731	Cysteine-S-sulfate								NOKPBJYHPHHWAN-REOHCLBHSA-N	C3H7NO5S2	1	M-H	199.969		13.95	13.97	59.6206	26.9528	54.1353	100	0.184909	0.0977978	0.285212	0.106789	0.457867	0.985013	0.120449	0.672246	0.765052	-0.0904251	0.436823	0.695343	0.0851656	0.176522	0.415131
Edoxudine	Pyrimidine nucleosides	HILIC_PosMS1_725			nonGL	5'-O-Methylthymidine M+H FiehnHILIC --- Edoxudine M+H HMDB --- Phenol, 4-[(1Z)-2-(3,5-dimethoxyphenyl)ethenyl]- M+H HMDB --- Pterostilbene M+H FiehnHILIC --- Pterostilbene M+H NIST	Nucleosides, nucleotides, and analogues	Pyrimidine nucleosides	Pyrimidine 2'-deoxyribonucleosides	HMDB0251705	Edoxudine	Polyketides [PR]	Aromatic polyketides [PK13]	Diphenyl ethers, biphenyls, dibenzyls and stilbenes [PK1309]	LMPK13090015	Pterostilbene			KTCKNHCDUKONFQ-UHFFFAOYNA-N, VLEUZFDZJKSGMX-ONEGZZNKSA-N, VLEUZFDZJKSGMX-UHFFFAOYSA-N, XACKNLSZYYIACO-UHFFFAOYSA-N	C11H16N2O5, C16H16O3	1	M+H	257.113		5.75	5.75	99.1892	8.41851	100	100	-0.163431	0.098624	0.285212	-0.353835	0.00467861	0.923985	-0.339338	0.176746	0.765052	0.00309702	0.976057	0.841471	-0.136881	0.0131996	0.250915
L-Pipecolic acid	Amino acids, peptides, and analogues	HILIC_PosMSMS_160	RT_4		nonGL	L-Pipecolic acid M+H HMDB	Organic acids and derivatives	Carboxylic acids and derivatives	Amino acids, peptides, and analogues	HMDB0000716, HMDB0005960, HMDB0000070	Pipecolic acid --- L-Pipecolic acid --- D-Pipecolic acid								HXEACLLIILLPRG-YFKPBYRVSA-N	C6H11NO2	1	M+H	130.086		16.27	16.26	66.2162	10.2839	89.4737	100	0.186481	0.0986923	0.285212	-0.0478813	0.742293	0.993093	0.115754	0.687627	0.765052	0.0511202	0.664082	0.785957	0.0555616	0.384476	0.506647
Paraxanthine --- Theobromine	Purines and purine derivatives	HILIC_PosMSMS_426			nonGL	Paraxanthine M+H HMDB --- Theobromine M+H HMDB --- Theobromine M+H NIST	Organoheterocyclic compounds	Imidazopyrimidines	Purines and purine derivatives	HMDB0001860, HMDB0002825	Paraxanthine --- Theobromine								QUNWUDVFRNGTCO-UHFFFAOYSA-N, YAPQBXQYLJRXSA-UHFFFAOYSA-N	C7H8N4O2	2	M+H	181.072	42.0331	1.57	1.56	39.1892	12.7961	96.2406	100	0.183784	0.0987616	0.285212	-0.0444718	0.756704	0.993093	0.347969	0.218568	0.765052	0.187583	0.103815	0.513382	0.0668358	0.288111	0.463424
ST 24:1;O3;S	ST - Steroid conjugates	RP_PosMS1_327		Y	nonGL	SL 12:2;O/12:1;O M+H Atlas --- ST 24:1;O3;S M+NH4 Atlas --- Trp-Ile-Arg M+H NIST						Sterols [ST]	Steroid conjugates [ST05]	Sulfates [ST0502]	LMST05020015	lithocholic acid sulfate	ST 24:1;O3;S		AXDXVEYHEODSPN-HVATVPOCSA-N, GQHAIUPYZPTADF-UHFFFAOYSA-N, KBMQVJDLLNKBOS-TVPPWHHANA-N	C24H40O6S	1	M+H --- M+NH4	474.283		0.8	0.79	85.7527	13.9356	100	100	0.186025	0.0993511	0.285748	0.183001	0.206918	0.985013	0.132661	0.644725	0.765052	-0.21878	0.0607712	0.444426	0.10084	0.112691	0.382475
TAG 53:5	TAG	RP_PosMSMS_1304		Y	GL	TG 17:1_18:1_18:3 M+Na Atlas --- TG 17:1_18:2_18:2 M+Na Atlas --- TG 17:2_18:1_18:2 M+Na Atlas						Glycerolipids [GL]	Triradylglycerols [GL03]	Triacylglycerols [GL0301]	LMGL03010218 --- LMGL03010219 --- LMGL03010223	TG(17:1(9Z)/18:1(9Z)/18:3(9Z,12Z,15Z))[iso6] --- TG(17:1(9Z)/18:2(9Z,12Z)/18:2(9Z,12Z))[iso3] --- TG(17:2(9Z,12Z)/18:1(9Z)/18:2(9Z,12Z))[iso6]	TG 53:5	TG 17:1_18:1_18:3 --- TG 17:1_18:2_18:2 --- TG 17:2_18:1_18:2	PGBGUWBYYROWIR-GYJZPJDZNA-N, QHYAATSKYBYSLG-FLJIINBZNA-N, SJKARBJSGKSAOO-ZALINIDZNA-N	C56H98O6	1	M+Na	889.72		10.51	10.5	72.3118	11.2848	99.2366	100	0.185859	0.0998842	0.2858	-0.0263661	0.856362	0.993093	0.284708	0.321758	0.765052	-0.147852	0.207561	0.61383	0.067865	0.287733	0.463424
PI 34:2	PI	RP_Pos, RP_NegMSMS_1205, 632		Y	nonGL	PI 34:2 M+Na Atlas, PI 16:0_18:2 M-H Atlas	Lipids and lipid-like molecules	Glycerophospholipids	Glycerophosphoinositols	HMDB0009784	PI(16:0/18:2(9Z,12Z))	Glycerophospholipids [GP]	Glycerophosphoinositols [GP06]	Diacylglycerophosphoinositols [GP0601]	LMGP06010959	PI(16:0/18:2(9Z,12Z))	PI 34:2	PI 16:0_18:2	GIASXRZRWQSUOZ-QGLGPCELNA-N, BSNJSZUDOMPYIR-BCTRXSSUNA-N	C43H79O13P	1, 2	M+Na, M-H	857.5113, 833.519	241.011	4.92	4.925	65.3226	19.3165	97.7099	100	0.188114	0.100177	0.2858	0.122716	0.404824	0.985013	0.165583	0.57008	0.765052	0.193143	0.103187	0.513382	0.0914864	0.156226	0.401182
TAG 52:5	TAG	RP_PosMSMS_1256, 1267		Y	GL	TG 16:0_18:2_18:3 M+NH4 Atlas, TG 16:0_18:2_18:3 M+Na Atlas --- TG 16:1_16:1_20:3 M+Na Atlas --- TG 16:1_18:2_18:2 M+Na Atlas	Lipids and lipid-like molecules	Glycerolipids	Triradylcglycerols	HMDB0044270, HMDB0005446, HMDB0044270	TG(16:1(9Z)/18:2(9Z,12Z)/18:2(9Z,12Z)) --- TG(16:0/18:2(9Z,12Z)/18:3(9Z,12Z,15Z))	Glycerolipids [GL]	Triradylglycerols [GL03]	Triacylglycerols [GL0301]	LMGL03010167, LMGL03010163 --- LMGL03010167	TG(16:0/18:2(9Z,12Z)/18:3(9Z,12Z,15Z))[iso6], TG(16:0/18:2(9Z,12Z)/18:3(9Z,12Z,15Z))[iso6] --- TG(16:1(9Z)/18:2(9Z,12Z)/18:2(9Z,12Z))[iso3]	TG 52:5	TG 16:0_18:2_18:3, TG 16:0_18:2_18:3 --- TG 16:1_18:2_18:2	MVAGPZSVOSGBMR-NTBFVYIFNA-N, CQZAAIKPSLHIBC-BDMHOKOONA-N, MVAGPZSVOSGBMR-NTBFVYIFNA-N, WSUXTFXYYDVMHN-BWRFOULENA-N	C55H96O6	1	M+NH4, M+Na	870.7486, 875.704		10.35	10.31	95.6989	10.1878	100	100	0.186963	0.102946	0.29252	-0.0268868	0.85568	0.993093	0.114279	0.695742	0.765052	-0.141051	0.236352	0.627436	0.0596961	0.357163	0.498192
TAG 46:2	TAG	RP_PosMSMS_996		Y	GL	TG 12:0_12:0_22:2 M+NH4 Atlas --- TG 12:0_16:0_18:2 M+NH4 Atlas --- TG 12:0_16:1_18:1 M+NH4 Atlas --- TG 14:0_16:1_16:1 M+NH4 Atlas --- TG 14:1_16:0_16:1 M+NH4 Atlas	Lipids and lipid-like molecules	Glycerolipids	Triradylcglycerols	HMDB0042309, HMDB0047771	TG(14:0/16:1(9Z)/16:1(9Z)) --- TG(14:1(9Z)/16:0/16:1(9Z))	Glycerolipids [GL]	Triradylglycerols [GL03]	Triacylglycerols [GL0301]	LMGL03012654 --- LMGL03012787 --- LMGL03013327 --- LMGL03013351 --- LMGL03014627	TG(12:0/12:0/22:2(13Z,16Z))[iso3] --- TG(12:0/16:0/18:2(9Z,12Z))[iso6] --- TG(12:0/16:1(9Z)/18:1(9Z))[iso6] --- TG(14:0/16:1(9Z)/16:1(9Z))[iso3] --- TG(14:1(9Z)/16:0/16:1(9Z))[iso6]	TG 46:2	TG 12:0_12:0_22:2 --- TG 12:0_16:0_18:2 --- TG 12:0_16:1_18:1 --- TG 14:0_16:1_16:1 --- TG 14:1_16:0_16:1	JORMHQSOEAESEA-FRIQFDFRNA-N, MIEULIUWCBAVBF-ZMPCKTLKNA-N, XUEMVUXNOCIHLG-IKJQKJQYNA-N, XYYRUMPXVOZUGQ-PAFQGHGSNA-N, YSIRRKPRSAWHFR-BLWADTQWNA-N	C49H90O6	1	M+NH4	792.702		10.09	10.05	88.7097	6.90148	99.2366	100	0.179105	0.107265	0.303573	0.0304937	0.831554	0.993093	0.19559	0.489725	0.765052	0.0774782	0.503426	0.728004	0.0723037	0.249576	0.444224
Met-Met	Amino acids, peptides, and analogues	HILIC_PosMS1_847			nonGL	Met-Met M+H NIST	Organic acids and derivatives	Carboxylic acids and derivatives	Amino acids, peptides, and analogues	HMDB0028979	Methionyl-Methionine								ZYTPOUNUXRBYGW-UHFFFAOYSA-N	C10H20N2O3S2	1	M+H	281.101		1.44	1.44	63.5135	13.8732	90.2256	100	0.182169	0.108469	0.305757	0.10826	0.458754	0.985013	0.293008	0.309931	0.765052	-0.315453	0.00660671	0.283279	0.0931048	0.145485	0.400083
FA 23:3;O3	FA - Eicosanoids	RP_PosMSMS_169		Y	nonGL	13,14-Dihydro-15-ketoprostaglandin F2.alpha. isopropyl ester M+H-H2O NIST --- Prostaglandin F2.alpha. isopropyl ester M+H-H2O NIST						Fatty Acyls [FA]	Eicosanoids [FA03]	Prostaglandins [FA0301]	LMFA03010076	PGF2alpha isopropyl ester	FA 23:3;O3		FPABVZYYTCHNMK-YNRDDPJXSA-N, HMEIMGKBZAEAEM-KKWQAXMHSA-N	C23H40O5	1	M+H-H2O	379.28		3.65	3.65	100	9.41152	100	100	-0.180437	0.109581	0.30756	-0.199495	0.167957	0.985013	0.0955825	0.739437	0.765052	0.06412	0.585131	0.771265	-0.090981	0.15231	0.401005
PI 36:4	PI	RP_Neg, RP_PosMSMS_680, 1282		Y	nonGL	PI 16:0_20:4 M-H Atlas, PI 36:4 M+Na Atlas	Lipids and lipid-like molecules	Glycerophospholipids	Glycerophosphoinositols	HMDB0009790	PI(16:0/20:4(8Z,11Z,14Z,17Z))								VWRYMIZQLPXULA-JAXHXWBXNA-N, XBRXODRRBPUJTR-XWVIRPHINA-N	C45H79O13P	2, 1	M-H, M+Na	857.5189, 881.5108	241.011	4.89	4.89	67.2043	18.8015	99.2366	100	0.183488	0.110279	0.30756	0.0610627	0.680036	0.993093	0.400271	0.169716	0.765052	0.0875447	0.46419	0.709168	0.0897062	0.166128	0.408039
Indole-3-propionic acid	Indoles and derivatives	HILIC_PosMSMS_458			nonGL	Indole-3-propionic acid M+H FiehnHILIC	Organoheterocyclic compounds	Indoles and derivatives	Indolyl carboxylic acids and derivatives	HMDB0002302	Indole-3-propionic acid								GOLXRNDWAUTYKT-UHFFFAOYSA-N	C11H11NO2	1	M+H	190.086		2.12	2.17	14.8649	15.419	25.5639	98.2456	-0.180442	0.110412	0.30756	-0.314466	0.0289653	0.985013	-0.0517743	0.857385	0.769105	-0.238797	0.0405368	0.428149	-0.120464	0.0576648	0.336408
DAG 40:6	DAG	RP_PosMSMS_685		Y	GL	1-Stearoyl-2-docosahexaenoyl-sn-glycerol M+Na NIST	Lipids and lipid-like molecules	Glycerolipids	Diradylglycerols	HMDB0007179	DG(18:0/22:6(4Z,7Z,10Z,13Z,16Z,19Z)/0:0)	Glycerolipids [GL]	Diradylglycerols [GL02]	Diacylglycerols [GL0201]	LMGL02010216	DG(18:0/22:6(4Z,7Z,10Z,13Z,16Z,19Z)/0:0)[iso2]	DG 40:6	DG 18:0_22:6	LBDXVTOFXXDOGH-KXYFHQNYSA-N	C43H72O5	1	M+Na	691.523		7.58	7.54	36.5591	10.1302	11.4504	100	0.172616	0.111535	0.308597	-0.0118848	0.932266	0.998614	0.0299471	0.913747	0.769107	-0.0164085	0.884601	0.828239	0.0538816	0.379653	0.503742
PC 37:6	PC	RP_PosMSMS_993, 1071		Y	nonGL	PC 15:0_22:6 M+H Atlas --- PC 19:1_18:5 M+H Atlas, PC 37:6 M+Na Atlas	Lipids and lipid-like molecules	Glycerophospholipids	Glycerophosphocholines	HMDB0007958	PC(15:0/22:6(4Z,7Z,10Z,13Z,16Z,19Z))	Glycerophospholipids [GP]	Glycerophosphocholines [GP01]	Diacylglycerophosphocholines [GP0101]	LMGP01011430	PC(15:0/22:6(4Z,7Z,10Z,13Z,16Z,19Z))	PC 37:6	PC 15:0_22:6	GEINPYKZLFHHIL-BDWYRQGHNA-N, IDGKBLBEWIRIHY-YZEBUURHNA-N, IDGKBLBEWIRIHY-YZEBUURHNA-N, MGHQDHJXPCPBOQ-MSXCAIDTNA-N	C45H78NO8P	1	M+H, M+Na	792.5505, 814.5338		5.405	5.39	63.7097	11.7271	98.4733	100	0.169807	0.112126	0.308597	0.128024	0.351749	0.985013	0.210307	0.439459	0.765052	-0.117608	0.289739	0.653825	0.0889195	0.139778	0.394605
FA 20:5;O2 --- FA 20:6;O	FA - Eicosanoids --- FA - Fatty Acids and Conjugates	RP_PosMS1_27		Y	nonGL	11-Oxo-15S-hydroxy-5Z,9,13E-prostatrienoic acid M+H-H2O NIST --- 12(S)-HpEPE M+H-H2O NIST --- 13,14-Dihydro-15-ketoprostaglandin A2 M+H-H2O NIST --- 13,14-Dihydro-15-ketoprostaglandin J2 M+H-H2O NIST --- 15(S)-HpEPE M+H-H2O NIST --- 15-Deoxy-.DELTA.12,14-prostaglandin D2 M+H-H2O NIST --- 15-Deoxy-.DELTA.12,14-prostaglandin J2 M+H NIST --- 20-Carboxyarachidonic acid M+H-H2O NIST --- 8-iso-Prostagl…	Lipids and lipid-like molecules	Fatty Acyls	Eicosanoids	HMDB0002710, HMDB0002752, HMDB0005079	Prostaglandin J2 --- Prostaglandin A2 --- 15-Deoxy-d-12,14-PGJ2	Fatty Acyls [FA]	Eicosanoids [FA03] --- Fatty Acids and Conjugates [FA01]	Dicarboxylic acids [FA0117] --- Hydroxy/hydroperoxyeicosapentaenoic acids [FA0307] --- Isoprostanes [FA0311] --- Prostaglandins [FA0301]	LMFA01170034 --- LMFA03010019 --- LMFA03010021 --- LMFA03010035 --- LMFA03010172 --- LMFA03070012 --- LMFA03110140	12S-HpEPE --- 15-deoxy-delta-12,14-PGA2 --- 15-deoxy-delta-12,14-PGJ2 --- 5Z,8Z,11Z,14Z-Eicosatetraenedioic acid --- PGA2 --- PGJ2 --- ent-15-epi-15-A2-IsoP	FA 20:5;O2 --- FA 20:6;O		APFJUBGRZGMQFF-UHFFFAOYSA-N, BGOJKUCHTMYINI-DTLRTWKJSA-N, BHHHGDAJJMEHST-NBIYZLHXSA-N, CGCZPIJMGKLVTQ-PUQPOMETSA-N, FMKLAIBZMCURLI-MELGOLLOSA-N, FPMFSFWYWZLDKP-DBVSHIMFSA-N, GCYWVCQBMLYQGZ-DAXSKMNVSA-N, HDMYXONNVAOHFR-UOLHMMFFSA-N, ITZOBNKQDZEOCE-UHFFFAOYSA-N, LLZXNUUIBOALNY-UHFFFAOYSA-N, MYHXHCUNDDAEOZ-FOSBLDSVSA-N, MYHXHCUNDDAEOZ-UKUWKSPLSA-N, PDTMWFVVNZYWTR-UHFFFAOYSA-N, PRFXRIUZNKLRHM-UBNQNMC…	C20H28O3, C20H30O4	1	M+H --- M+H-H2O	317.214		0.42	0.4	54.0323	13.8795	94.6565	100	0.179782	0.112534	0.308597	0.201885	0.164798	0.985013	0.220621	0.444187	0.765052	-0.183401	0.118106	0.51752	0.106854	0.0935903	0.363954
TAG 50:3	TAG	RP_PosMSMS_1170, 1184		Y	GL	TG 16:0_16:1_18:2 M+NH4 Atlas --- TG 16:1_16:1_18:1 M+NH4 Atlas, TG 16:0_16:1_18:2 M+Na Atlas	Lipids and lipid-like molecules	Glycerolipids	Triradylcglycerols	HMDB0005379, HMDB0005433	TG(16:0/16:1(9Z)/18:2(9Z,12Z)) --- TG(16:1(9Z)/16:1(9Z)/18:1(9Z))	Glycerolipids [GL]	Triradylglycerols [GL03]	Triacylglycerols [GL0301]	LMGL03010052 --- LMGL03010053, LMGL03010053	TG(16:0/16:1(9Z)/18:2(9Z,12Z))[iso6] --- TG(16:1(9Z)/16:1(9Z)/18:1(9Z))[iso3], TG(16:0/16:1(9Z)/18:2(9Z,12Z))[iso6]	TG 50:3	TG 16:0_16:1_18:2 --- TG 16:1_16:1_18:1, TG 16:0_16:1_18:2	HDFLQJUGWGNORO-RTTOVTDCNA-N, UFHNZOACKFBCOM-ULXWNTFBNA-N, HDFLQJUGWGNORO-RTTOVTDCNA-N	C53H96O6	1	M+NH4, M+Na	846.7488, 851.7042		10.54	10.47	98.1183	7.8086	100	100	0.180964	0.112635	0.308597	0.0146285	0.92075	0.998614	0.132036	0.649564	0.765052	-0.0734221	0.536461	0.74452	0.0666898	0.300739	0.469318
PC 31:1	PC	RP_PosMSMS_766		Y	nonGL	PC 15:0_16:1 M+H Atlas --- PC 16:0_15:1 M+H Atlas	Lipids and lipid-like molecules	Glycerophospholipids	Glycerophosphocholines	HMDB0007936	PC(15:0/16:1(9Z))	Glycerophospholipids [GP]	Glycerophosphocholines [GP01]	Diacylglycerophosphocholines [GP0101]	LMGP01010535 --- LMGP01011464	PC(15:0/16:1(9Z)) --- PC(16:0/15:1(9Z))	PC 31:1	PC 15:0_16:1 --- PC 15:1_16:0	QFVHCMLUKNHDSH-VLGSPTGONA-N, UPVBGIUAKUZSSB-ICFOKQHNNA-N	C39H76NO8P	1	M+H	718.536		5.47	5.42	32.2581	27.129	87.0229	100	0.177151	0.113154	0.308597	0.046971	0.744469	0.993093	0.0521319	0.854861	0.769105	0.0438955	0.706348	0.795815	0.0677807	0.283224	0.463424
PC 35:0	PC	RP_PosMS1_1019		Y	nonGL	NAGlySer 16:3/26:4 M+NH4 Atlas --- NAGlySer 18:3/24:4 M+NH4 Atlas --- NAGlySer 18:5/24:2 M+NH4 Atlas --- NAGlySer 20:2/22:5 M+NH4 Atlas --- NAGlySer 20:3/22:4 M+NH4 Atlas --- NAGlySer 20:4/22:3 M+NH4 Atlas --- NAGlySer 20:5/22:2 M+NH4 Atlas --- NAGlySer 22:3/20:4 M+NH4 Atlas --- NAGlySer 22:4/20:3 M+NH4 Atlas --- NAGlySer 22:5/20:2 M+NH4 Atlas --- NAGlySer 22:6/20:1 M+NH4 Atlas --- NAGlySer 24:4/…	Lipids and lipid-like molecules	Glycerophospholipids	Glycerophosphocholines	HMDB0304666	dehydrocafestol	Glycerophospholipids [GP]	Glycerophosphocholines [GP01]	Diacylglycerophosphocholines [GP0101]	LMGP01010709	PC(17:0/18:0)	PC 35:0	PC 17:0_18:0	BCZZMIJIZSXYMF-MQWJUSMANA-N, BODSPENRFWJIGW-VZAUZSSSNA-N, CDLICNAGIRRULJ-UHFFFAOYNA-N, FWYDEMRSGXNFSY-NNGFZEIVNA-N, GRUQDYJFQMXPMS-IHGCSAEZNA-N, JOWPAQZOHXXTGS-GHVBSFDYNA-N, JQMAMMJOSYFHRZ-BEADTEGNNA-N, LQGLEQNRCHTYGG-UCJAPQOKNA-N, MQVFAEPOELPZLT-RZQRYCFRNA-N, QJGIKJFRJAPIJS-DJNJOQKDNA-N, QKNWGSFAZJCJCG-PDRJBDLBNA-N, RYPYXOHYJHSGAL-HLZDJXKNNA-N, UHIHPRYEEPCCJR-KQTUHKLVNA-N, ULZPSGUIDAXLAN-XVNJIMK…	C43H86NO8P	1	M+NH4 --- M+Na	798.595		6.87	6.84	53.4946	10.6921	100	100	0.177633	0.113402	0.308597	0.0163483	0.910004	0.997945	0.123215	0.666444	0.765052	-0.024477	0.834191	0.818513	0.0655306	0.301252	0.469318
L-Tryptophan	Indoles and derivatives	HILIC_Pos, HILIC_NegMSMS_515, 293, 446, 1435, 879			nonGL	D-Tryptophan M+H HMDB --- L-Tryptophan M+H NIST, D-Tryptophan M-H HMDB --- L-Tryptophan M-H HMDB --- L-Tryptophan M-H NIST --- Tryptophan; LC-ESI-ITFT; MS2; HCD; CE 90.0 eV; [M-H]- M-H MassBank, L-Tryptophan M+H-NH3 NIST, L-Tryptophan 2M+H NIST, L-Tryptophan 2M-H NIST	Organoheterocyclic compounds	Indoles and derivatives	Indolyl carboxylic acids and derivatives	HMDB0013609, HMDB0030396, HMDB0000929	L-Tryptophan --- D-Tryptophan --- (¬±)-Tryptophan								QIVBCDIJIAJPQS-SECBINFHSA-N, QIVBCDIJIAJPQS-UHFFFAOYSA-N, QIVBCDIJIAJPQS-SECBINFHSA-N, QIVBCDIJIAJPQS-UHFFFAOYNA-N, QIVBCDIJIAJPQS-UHFFFAOYSA-N, QIVBCDIJIAJPQS-VIFPVBQESA-N, QIVBCDIJIAJPQS-UHFFFAOYSA-N	C11H12N2O2	1	M+H, M-H, M+H-NH3, 2M+H, 2M-H	205.0969, 203.0824, 188.0709, 409.1864, 407.1703		10.86	10.84	100	6.82793	100	100	0.168656	0.11527	0.311804	0.0722361	0.600487	0.993093	0.0557503	0.838127	0.769105	0.0830343	0.456231	0.706742	0.0701468	0.245903	0.443666
CAR 11:0	CAR	HILIC_PosMSMS_1121		Y	nonGL	CAR 11:0 M Atlas														C18H36NO4	1	M	330.263		1.97	1.97	88.6486	4.55604	100	100	0.164893	0.115461	0.311804	0.083787	0.534497	0.985013	-0.0110073	0.967113	0.781237	-0.0555331	0.610734	0.779737	0.0678876	0.250995	0.444224
ST 19:2;O2;S	ST - Steroid conjugates	RP_PosMS1_147		Y	nonGL	4-Androsten-17.beta.-ol-3-one sulfate M+H NIST	Lipids and lipid-like molecules	Steroids and steroid derivatives	Sulfated steroids	HMDB0002833, HMDB0013230	Testosterone sulfate --- Epitestosterone sulfate	Sterols [ST]	Steroid conjugates [ST05]	Sulfates [ST0502]	LMST05020032 --- LMST05020043	Epitestosterone sulfate --- Testosterone sulfate	ST 19:2;O2;S		WAQBISPOEAOCOG-PPORCNLBSA-N	C19H28O5S	1	M+H	369.168		0.79	0.79	58.6022	12.9208	74.8092	100	0.176713	0.118412	0.318529	0.160271	0.270377	0.985013	0.121601	0.67315	0.765052	-0.222331	0.057107	0.442848	0.0929537	0.144848	0.400083
N-Acetyltryptophan	Amino acids, peptides, and analogues	HILIC_NegMS1_417	RT_1		nonGL	N-Acetyl-D-tryptophan M-H HMDB --- N-Acetyltryptophan M-H FiehnHILIC --- N-Acetyltryptophan M-H HMDB	Organic acids and derivatives	Carboxylic acids and derivatives	Amino acids, peptides, and analogues	HMDB0013713, HMDB0255052	N-Acetyltryptophan --- N-Acetyl-D-tryptophan								DZTHIGRZJZPRDV-LBPRGKRZSA-N, DZTHIGRZJZPRDV-UHFFFAOYNA-N, DZTHIGRZJZPRDV-UHFFFAOYSA-N	C13H14N2O3	1	M-H	245.093		5.45	5.52	83.1978	19.9764	75.9398	100	0.174312	0.119003	0.318529	0.0314233	0.827359	0.993093	0.00824195	0.976924	0.782875	0.103931	0.371417	0.676013	0.0617107	0.328653	0.482274
FA 12:0;O	FA - Fatty Acids and Conjugates	HILIC_NegMS1_280, 932		Y	nonGL	12-Hydroxydodecanoic acid M-H-H2O NIST, 3-Hydroxydodecanoic acid 2M-H NIST	Organic acids and derivatives	Hydroxy acids and derivatives	Medium-chain hydroxy acids and derivatives	HMDB0002059	12-Hydroxydodecanoic acid	Fatty Acyls [FA]	Fatty Acids and Conjugates [FA01]	Hydroxy fatty acids [FA0105]	LMFA01050039, LMFA01050037	Sabinic acid, beta-hydroxylauric acid	FA 12:0;O		ZDHCZVWCTKTBRY-UHFFFAOYSA-N, MUCMKTPAZLSKTL-UHFFFAOYSA-N	C12H24O3	1	M-H-H2O, 2M-H	197.1543, 431.3363		1.26	1.29	68.8347	9.01633	99.2481	100	-0.173983	0.119303	0.318529	-0.0922616	0.521123	0.985013	-0.347298	0.220648	0.765052	-0.127899	0.270332	0.642621	-0.090103	0.152218	0.401005
PC 37:0	PC	RP_PosMSMS_1107		Y	nonGL	NAGly 26:7/26:4 M+H Atlas --- NAGlySer 18:3/26:4 M+NH4 Atlas --- NAGlySer 18:5/26:2 M+NH4 Atlas --- NAGlySer 20:3/24:4 M+NH4 Atlas --- NAGlySer 20:5/24:2 M+NH4 Atlas --- NAGlySer 22:2/22:5 M+NH4 Atlas --- NAGlySer 22:3/22:4 M+NH4 Atlas --- NAGlySer 22:4/22:3 M+NH4 Atlas --- NAGlySer 22:5/22:2 M+NH4 Atlas --- NAGlySer 22:6/22:1 M+NH4 Atlas --- NAGlySer 24:3/20:4 M+NH4 Atlas --- NAGlySer 24:4/20:3 …						Glycerophospholipids [GP]	Glycerophosphocholines [GP01]	Diacylglycerophosphocholines [GP0101]	LMGP01011590	PC(18:0/19:0)	PC 37:0	PC 18:0_19:0	CFTNFZPEPYFOEZ-JDKQWUNENA-N, FDOSHGWBEDHFDD-OIZFGRNMNA-N, GYQYQOZEAIMJRF-OAHMSRQJNA-N, IFJJJCCHAXWTHR-UHFFFAOYNA-N, IZJOANRZHZRHMS-UHFFFAOYNA-N, LMRWLDLVMPCCNM-VKBWLZLZNA-N, LWNJFMDTPCUCKU-ZBDVQUTONA-N, OMPSQNZISYVMFA-BPWHAQPVNA-N, PGICGQDUDVKUEU-GDWOKDOXNA-N, QEDUPJSSSYDLSW-ATUHWPGSNA-N, QFDWQPQJMSDLRK-XKXAXSNGNA-N, QLBQTMUVQNECNS-YYCJEVCSNA-N, QURHJRUOWAZLHJ-ABKIDBDBNA-N, QZEBOMQLRWDGMO-GPDILFH…	C45H90NO8P	1	M+H --- M+NH4 --- M+Na	826.624		7.5	7.51	66.6667	11.5515	99.2366	100	0.169585	0.120947	0.320515	0.0560147	0.690892	0.993093	0.0290374	0.917001	0.769107	-0.181565	0.108752	0.513486	0.0659889	0.285241	0.463424
LPE 20:4	LPE	RP_NegMSMS_125		Y	nonGL	LPE 20:4 M-H Atlas	Lipids and lipid-like molecules	Glycerophospholipids	Glycerophosphoethanolamines	HMDB0011518	LysoPE(20:4(8Z,11Z,14Z,17Z)/0:0)	Glycerophospholipids [GP]	Glycerophosphoethanolamines [GP02]	Monoacylglycerophosphoethanolamines [GP0205]	LMGP02050067	PE(20:4(8Z,11Z,14Z,17Z)/0:0)	LPE 20:4	LPE 20:4	JPNPIRVRGLGTRE-LTKCOYKYNA-N	C25H44NO7P	2	M-H	500.278	303.227	2.56	2.56	77.8976	21.3411	96.9466	100	-0.17331	0.122862	0.320515	-0.0260278	0.857289	0.993093	-0.113783	0.690851	0.765052	0.0481103	0.680889	0.786097	-0.0655642	0.301382	0.469318
TAG 54:8	TAG	RP_PosMSMS_1316, 1328		Y	GL	TG 18:2_18:3_18:3 M+NH4 Atlas, TG 14:0_18:2_22:6 M+Na Atlas --- TG 14:0_20:4_20:4 M+Na Atlas --- TG 16:1_18:2_20:5 M+Na Atlas --- TG 18:2_18:3_18:3 M+Na Atlas	Lipids and lipid-like molecules	Glycerolipids	Triradylcglycerols	HMDB0042539, HMDB0042836, HMDB0048761, HMDB0052749	TG(14:0/18:2(9Z,12Z)/22:6(4Z,7Z,10Z,13Z,16Z,19Z)) --- TG(14:0/20:4(8Z,11Z,14Z,17Z)/20:4(8Z,11Z,14Z,17Z)) --- TG(16:1(9Z)/18:2(9Z,12Z)/20:5(5Z,8Z,11Z,14Z,17Z)) --- TG(18:2(9Z,12Z)/18:3(9Z,12Z,15Z)/18:3(9Z,12Z,15Z))	Glycerolipids [GL]	Triradylglycerols [GL03]	Triacylglycerols [GL0301]	LMGL03010471, LMGL03010471 --- LMGL03010503 --- LMGL03014400	TG(18:2(9Z,12Z)/18:3(9Z,12Z,15Z)/18:3(9Z,12Z,15Z))[iso3], TG(14:0/18:2(9Z,12Z)/22:6(4Z,7Z,10Z,13Z,16Z,19Z))[iso6] --- TG(16:1(9Z)/18:2(9Z,12Z)/20:5(5Z,8Z,11Z,14Z,17Z))[iso6] --- TG(18:2(9Z,12Z)/18:3(9Z,12Z,15Z)/18:3(9Z,12Z,15Z))[iso3]	TG 54:8	TG 18:2_18:3_18:3, TG 14:0_18:2_22:6 --- TG 16:1_18:2_20:5 --- TG 18:2_18:3_18:3	IMPMCCKWZKDAGE-DJOODRDWNA-N, AINACBPMKQPREK-UUCWSGKLNA-N, CJQMVWLALQLDMB-ZHPZIBMJNA-N, IMPMCCKWZKDAGE-DJOODRDWNA-N, WVSDNSFUOYSLDY-YSJMBLHXNA-N	C57H94O6	1	M+NH4, M+Na	892.7325, 897.6912		9.87	9.875	60.4839	14.1938	99.2366	100	0.175782	0.123503	0.320515	0.00739074	0.959918	0.998614	0.198482	0.494374	0.765052	-0.0932525	0.432172	0.695343	0.0669319	0.299051	0.469318
SPB 18:1;O2	SPB	HILIC_PosMSMS_968	RT_2	Y	nonGL	D-erythro-C18-Sphingosine M+H NIST	Organic nitrogen compounds	Organonitrogen compounds	Amines	HMDB0000252	Sphingosine	Sphingolipids [SP]	Sphingoid bases [SP01]	Sphing-4-enines (Sphingosines) [SP0101]	LMSP01010001	Sphingosine	SPB 18:1;O2		WWUZIQQURGPMPG-KRWOKUGFSA-N	C18H37NO2	1	M+H	300.289		7.82	7.85	35.6757	23.5216	12.782	100	0.176574	0.123972	0.320515	0.175706	0.233185	0.985013	0.606165	0.0361196	0.765052	0.121161	0.309732	0.654154	0.119825	0.0629482	0.336408
LPI 16:0	LPI	HILIC_NegMSMS_1182		Y	nonGL	LPI 16:0 M-H Atlas	Lipids and lipid-like molecules	Glycerophospholipids	Glycerophosphoinositols	HMDB0061695	LysoPI(16:0/0:0)	Glycerophospholipids [GP]	Glycerophosphoinositols [GP06]	Monoacylglycerophosphoinositols [GP0605]	LMGP06050002	PI(16:0/0:0)	LPI 16:0	LPI 16:0	UOXRPRZMAROFPH-UHFFFAOYNA-N	C25H49O12P	1	M-H	571.29		10.9	10.89	69.1057	21.2382	98.4962	100	0.175487	0.124565	0.320515	0.111329	0.448889	0.985013	0.300246	0.301065	0.765052	0.139194	0.240642	0.627436	0.0919377	0.153207	0.401005
Deoxyadenosine	Purine nucleosides	HILIC_NegMS1_436			nonGL	2'-Deoxyadenosine M-H FiehnHILIC --- 5'-Deoxyadenosine M-H HMDB --- Cordycepin M-H FiehnHILIC --- Deoxyadenosine M-H FiehnHILIC --- Deoxyadenosine M-H HMDB --- Muramic acid M-H FiehnHILIC	Nucleosides, nucleotides, and analogues	Purine nucleosides --- 5'-deoxyribonucleosides	Purine 2'-deoxyribonucleosides --- NA	HMDB0000101, HMDB0001983	Deoxyadenosine --- 5'-Deoxyadenosine								MSFSPUZXLOGKHJ-UHFFFAOYNA-N, OFEZSBMBBKLLBJ-UHFFFAOYNA-N, OLXZPDWKRNYJJZ-RRKCRQDMSA-N, OLXZPDWKRNYJJZ-UHFFFAOYNA-N, XGYIMTFOTBMPFP-KQYNXXCUSA-N	C10H13N5O3	1	M-H	250.094		8.08	8.1	35.2304	19.9084	97.7444	100	-0.168258	0.125166	0.320515	-0.105435	0.455196	0.985013	-0.408428	0.141858	0.765052	0.0619066	0.587851	0.772347	-0.0938521	0.128684	0.388039
PC 30:1	PC	RP_PosMSMS_719, 787		Y	nonGL	PC 15:0_15:1 M+H Atlas, PC 30:1 M+Na Atlas						Glycerophospholipids [GP]	Glycerophosphocholines [GP01]	Diacylglycerophosphocholines [GP0101]	LMGP01011412	PC(15:0/15:1(9Z))	PC 30:1	PC 15:0_15:1	BOEDQMXDOQTABI-ICFOKQHNNA-N, BOEDQMXDOQTABI-ICFOKQHNNA-N, PUSMCKGZMONNJO-MSUUIHNZNA-N	C38H74NO8P	1	M+H, M+Na	704.5194, 726.5025		5.14	5.13	71.2366	12.5428	100	100	0.173194	0.125181	0.320515	0.0722291	0.61947	0.993093	0.140125	0.6261	0.765052	0.0557063	0.635733	0.785372	0.0757509	0.234591	0.443666
TAG 56:6	TAG	RP_PosMSMS_1394, 1407		Y	GL	TG 16:0_18:1_22:5 M+NH4 Atlas --- TG 18:1_18:1_20:4 M+NH4 Atlas, TG 16:0_18:1_22:5 M+Na Atlas --- TG 18:0_18:1_20:5 M+Na Atlas --- TG 18:1_18:1_20:4 M+Na Atlas	Lipids and lipid-like molecules	Glycerolipids	Triradylcglycerols	HMDB0044134, HMDB0049916, HMDB0044961	TG(16:0/18:1(9Z)/22:5(7Z,10Z,13Z,16Z,19Z)) --- TG(18:0/18:1(9Z)/20:5(5Z,8Z,11Z,14Z,17Z)) --- TG(18:1(9Z)/18:1(9Z)/20:4(8Z,11Z,14Z,17Z))	Glycerolipids [GL]	Triradylglycerols [GL03]	Triacylglycerols [GL0301]	LMGL03010849, LMGL03010683 --- LMGL03010849	TG(16:0/18:1(9Z)/22:5(7Z,10Z,13Z,16Z,19Z))[iso6], TG(16:0/18:1(9Z)/22:5(7Z,10Z,13Z,16Z,19Z))[iso6] --- TG(18:0/18:1(9Z)/20:5(5Z,8Z,11Z,14Z,17Z))[iso6]	TG 56:6	TG 16:0_18:1_22:5, TG 16:0_18:1_22:5 --- TG 18:0_18:1_20:5	LWFHQFIZUUUVSB-BMRXIDLQNA-N, PIUUVQYTIKPYIJ-OKBSSIGONA-N, BLNSKVFNUJRUQY-KYXCFQCLNA-N, LWFHQFIZUUUVSB-BMRXIDLQNA-N, PIUUVQYTIKPYIJ-OKBSSIGONA-N	C59H102O6	2, 1	M+NH4, M+Na	924.7949, 929.7499	339.287	10.82	10.79	87.9032	6.50857	98.4733	100	0.1677	0.125534	0.320515	-0.0568249	0.686925	0.993093	0.0851053	0.760202	0.765052	-0.130952	0.249284	0.634176	0.0463696	0.453781	0.552037
CAR 10:0	CAR	RP_PosMSMS_26		Y	nonGL	CAR 10:0 M Atlas														C17H34NO4	1	M	316.247		0.6	0.6	45.4301	10.9283	100	100	0.168494	0.125745	0.320515	0.215169	0.126924	0.985013	0.22859	0.414118	0.765052	0.116291	0.309164	0.654154	0.106236	0.085882	0.363249
LPA 18:1	LPA	RP_NegMSMS, MS1_80, 94		Y	nonGL	1-Oleoyl-L-.alpha.-lysophosphatidic acid M-H-H2O NIST, 1-Oleoyl-L-.alpha.-lysophosphatidic acid M-H NIST --- LPA 18:1 M-H Atlas						Glycerophospholipids [GP]	Glycerophosphates [GP10]	Monoacylglycerophosphates [GP1005]	LMGP10050008	PA(18:1(9Z)/0:0)	LPA 18:1	LPA 18:1	WRGQSWVCFNIUNZ-GDCKJWNLSA-N, WRGQSWVCFNIUNZ-GDCKJWNLSA-N, WRGQSWVCFNIUNZ-KTKRTIGZNA-N	C21H41O7P	2, 1	M-H-H2O, M-H	417.2411, 435.2516	281.247	2.92	2.915	37.1968	28.1181	99.2366	100	-0.16923	0.126092	0.320515	-0.0400493	0.778699	0.993093	-0.304008	0.279354	0.765052	-0.0843685	0.463544	0.709168	-0.0763751	0.221017	0.443666
Glucoheptonic acid	Xenobiotics	HILIC_NegMSMS_349			nonGL	Glucoheptonic acid M-H NIST	Organic oxygen compounds	Organooxygen compounds	Carbohydrates and carbohydrate conjugates	HMDB0240292, HMDB0252766	2,3,4,5,6,7-Hexahydroxyheptanoic acid --- Glucoheptonic acid								KWMLJOLKUYYJFJ-DIHCEYMBSA-N	C7H14O8	2	M-H	225.061	119.034	11.89	11.88	92.4119	15.7223	81.203	100	-0.165706	0.12634	0.320515	-0.164563	0.237046	0.985013	-0.386579	0.159491	0.765052	0.311456	0.00490609	0.283279	-0.103383	0.0897731	0.363954
DAG 36:6	DAG	RP_PosMS1_523		Y	GL	DG 34:3 M+Na Atlas --- Di-.gamma.-linolenin (6c,9c,12c) M+H NIST --- Dilinolenin (9c,12c,15c) M+H NIST --- TG O-10:0_8:0_16:3 M+Na Atlas --- TG O-16:3_8:0_10:0 M+Na Atlas --- TG O-18:3_8:0_8:0 M+Na Atlas --- TG O-8:0_10:0_16:3 M+Na Atlas --- TG O-8:0_8:0_18:3 M+Na Atlas	Lipids and lipid-like molecules	Fatty Acyls	Lineolic acids and derivatives	HMDB0007278, HMDB0007308	DG(18:3(6Z,9Z,12Z)/18:3(6Z,9Z,12Z)/0:0) --- DG(18:3(9Z,12Z,15Z)/18:3(9Z,12Z,15Z)/0:0)	Glycerolipids [GL]	Diradylglycerols [GL02]	Diacylglycerols [GL0201]	LMGL02010079 --- LMGL02010328	DG(18:3(6Z,9Z,12Z)/18:3(6Z,9Z,12Z)/0:0) --- DG(18:3(9Z,12Z,15Z)/18:3(9Z,12Z,15Z)/0:0)	DG 36:6	DG 18:3_18:3	CJKXNIAUCJAYKE-LJURNQLPNA-N, GGRNGZUFILJWON-NIFPDXOQNA-N, JNUVNONUAFLTRU-JUOVZTPBNA-N, JVRVKOOOXHGJKI-HUYIQXHZSA-N, RAPBJBKXYYMYAY-YTWBPVBXSA-N, RGKZYRNBNHKMQD-MOLFYXCTNA-N, WSRMJAPSRBVVIW-UFKRRDRXNA-N, YHZZZJFFXIZEGA-JUOVZTPBNA-N	C39H64O5	1	M+H --- M+Na	613.477		6.74	6.71	67.4731	19.0628	100	100	0.173588	0.126571	0.320515	-0.00689286	0.962447	0.998614	0.0783956	0.786492	0.765655	-0.00258459	0.982579	0.841471	0.0575467	0.370101	0.500811
PE O-40:7	PE-O	RP_Pos, RP_NegMSMS_946, 477		Y	nonGL	PC O-37:7 M+H Atlas --- PE O-18:1_22:6 M+H Atlas --- PE O-18:2_22:5 M+H Atlas, PE O-18:1_22:6 M-H Atlas --- PE O-18:2_22:5 M-H Atlas													IVBLZGVNSKPGOR-XAJDCCMMNA-N, JNVLVKHBDFWUGW-XXKLZNGKNA-N, ZGFRFFVTVBULAT-WHFSXHQCNA-N, IVBLZGVNSKPGOR-XAJDCCMMNA-N, ZGFRFFVTVBULAT-WHFSXHQCNA-N	C45H78NO7P	1, 2	M+H, M-H	776.5578, 774.5446	464.318	6.68	6.64	87.3656	28.1081	98.4733	100	0.162591	0.126856	0.320515	-0.0537881	0.69497	0.993093	0.34548	0.20108	0.765052	0.0214704	0.846544	0.822718	0.058198	0.333373	0.482641
TAG 50:4	TAG	RP_PosMSMS_1167		Y	GL	TG 16:1_16:1_18:2 M+NH4 Atlas	Lipids and lipid-like molecules	Glycerolipids	Triradylcglycerols	HMDB0005435	TG(16:1(9Z)/16:1(9Z)/18:2(9Z,12Z))	Glycerolipids [GL]	Triradylglycerols [GL03]	Triacylglycerols [GL0301]	LMGL03010064	TG(16:1(9Z)/16:1(9Z)/18:2(9Z,12Z))[iso3]	TG 50:4	TG 16:1_16:1_18:2	PVMBAGXWHHZKFP-BGWVPBAENA-N	C53H94O6	1	M+NH4	844.734		10.25	10.21	81.9892	9.02227	100	100	0.172332	0.126985	0.320515	0.0187509	0.897452	0.997945	0.140862	0.624187	0.765052	-0.0559436	0.634198	0.785372	0.0651866	0.30669	0.473052
Asymmetric dimethylarginine --- Symmetric dimethylarginine	Amino acids, peptides, and analogues	HILIC_PosMSMS_508			nonGL	ADMA M+H FiehnHILIC --- Asymmetric dimethylarginine M+H HMDB --- N,N-Dimethylarginine M+H FiehnHILIC --- NG,NG-Dimethyl-L-arginine M+H NIST --- Symmetric dimethylarginine M+H HMDB	Organic acids and derivatives	Carboxylic acids and derivatives	Amino acids, peptides, and analogues	HMDB0001539, HMDB0003334	Asymmetric dimethylarginine --- Symmetric dimethylarginine								HVPFXCBJHIIJGS-LURJTMIESA-N, NWGZOALPWZDXNG-UHFFFAOYNA-N, YDGMGEXADBMOMJ-LURJTMIESA-N, YDGMGEXADBMOMJ-UHFFFAOYNA-N	C8H18N4O2	1	M+H	203.15		15.38	15.36	74.0541	13.3238	100	100	-0.172506	0.127427	0.320515	-0.295655	0.0404508	0.985013	-0.470334	0.100504	0.765052	0.139144	0.236242	0.627436	-0.134991	0.0331052	0.305104
PC 42:6	PC	RP_PosMS1_1223		Y	nonGL	PC 10:0_32:6 M+H Atlas --- PC 12:0_30:6 M+H Atlas --- PC 14:0_28:6 M+H Atlas --- PC 14:1_28:5 M+H Atlas --- PC 16:0_26:6 M+H Atlas --- PC 16:1_26:5 M+H Atlas --- PC 16:2_26:4 M+H Atlas --- PC 16:3_26:3 M+H Atlas --- PC 18:0_24:6 M+H Atlas --- PC 18:1_24:5 M+H Atlas --- PC 18:2_24:4 M+H Atlas --- PC 18:3_24:3 M+H Atlas --- PC 20:0_22:6 M+H Atlas --- PC 20:1_22:5 M+H Atlas --- PC 20:2_22:4 M+H Atla…	Lipids and lipid-like molecules	Glycerophospholipids	Glycerophosphocholines	HMDB0008288, HMDB0008320, HMDB0008576, HMDB0008608	PC(20:0/22:6(4Z,7Z,10Z,13Z,16Z,19Z)) --- PC(20:1(11Z)/22:5(7Z,10Z,13Z,16Z,19Z)) --- PC(22:1(13Z)/20:5(5Z,8Z,11Z,14Z,17Z)) --- PC(22:2(13Z,16Z)/20:4(8Z,11Z,14Z,17Z))	Glycerophospholipids [GP]	Glycerophosphocholines [GP01]	Diacylglycerophosphocholines [GP0101]	LMGP01011028	PC(20:0/22:6(4Z,7Z,10Z,13Z,16Z,19Z))	PC 42:6	PC 20:0_22:6	AFTRJSVHRLFLAY-PIYZSIFBNA-N, AMOJNOSCFBYKGW-UPASBRHPNA-N, ASYVAXPCTJHFPU-PIKXPDFENA-N, AYUDXLDIRVALGO-QUAAIENRNA-N, BBAHYSGXOGUTLF-IQAYYXADNA-N, BPEUHHPABHCVSG-AIOSOUQUNA-N, CXKIXHCEIMVVIG-BHYFOJFTNA-N, DACCJJIXTGMGHB-CIHXVFMSNA-N, DAJLMTXDNKNEQS-PHMZLQAKNA-N, DVVMJVCDQPHTQM-RFQIHOCNNA-N, DWWMSUBBFUVFIU-GHTSRROENA-N, HBXXJJMCMZIOOS-CALTWKEUNA-N, HJDUIKFMBRCDQU-YQIZYYBANA-N, HWXNFTQLVLBDLK-NFYCTIB…	C50H88NO8P	1	M+H --- M+NH4	862.625		5.39	5.36	48.1183	25.2839	53.4351	100	-0.163306	0.127459	0.320515	-0.233233	0.0887817	0.985013	0.118459	0.664152	0.765052	-0.232501	0.0351734	0.419009	-0.0909383	0.131655	0.388039
O-Arachidonoylglycidol	Xenobiotics	HILIC_PosMSMS_1263			nonGL	O-Arachidonoylglycidol M+H NIST													ACYNJBAUKQMZDF-DOFZRALJSA-N	C23H36O3	1	M+H	361.273		10.6	10.61	67.027	26.0672	96.9925	100	0.16825	0.127778	0.320515	-0.147329	0.299347	0.985013	0.181317	0.519002	0.765052	-0.298631	0.00828054	0.283279	0.033818	0.58849	0.609235
Asp-Pro	Amino acids, peptides, and analogues	HILIC_PosMSMS_608			nonGL	(R)-Naproxen M+H HMDB --- 2-Acetyl-5-(tetrahydroxybutyl)imidazole M+H NIST --- Asp-Pro M+H NIST --- Dihydroresveratrol M+H HMDB --- Kavain, DL- M+H NIST --- Naproxen M+H FiehnHILIC --- Naproxen M+H HMDB --- Naproxen M+H NIST --- Naproxen; LC-ESI-ITFT; MS2; CE M+H MassBank --- Pro-Asp M+H NIST	Organic acids and derivatives	Carboxylic acids and derivatives	Amino acids, peptides, and analogues	HMDB0028761, HMDB0029013	Aspartyl-Proline --- Prolyl-Aspartate	Polyketides [PR]	Aromatic polyketides [PK13]	Diphenyl ethers, biphenyls, dibenzyls and stilbenes [PK1309]	LMPK13090035	Dihydroresveratrol			CMWTZPSULFXXJA-UHFFFAOYNA-N, CMWTZPSULFXXJA-UHFFFAOYSA-N, CMWTZPSULFXXJA-VIFPVBQESA-N, CQSIXFHVGKMLGQ-BWZBUEFSSA-N, GLEOIKLQBZNKJZ-UHFFFAOYSA-N, HITJFUSPLYBJPE-UHFFFAOYSA-N, UKGGPJNBONZZCM-UHFFFAOYSA-N, XEAQIWGXBXCYFX-BQYQJAHWSA-N	C14H14O3, C9H14N2O5	1	M+H	231.097		1.4	1.41	62.1622	10.1834	21.8045	85.0877	0.167475	0.1282	0.320515	0.0836245	0.55514	0.988506	-0.124233	0.657642	0.765052	0.0118093	0.917982	0.833368	0.0630817	0.310283	0.473407
FA 18:0	FA - Fatty Acids and Conjugates	HILIC_NegMS1_532		Y	nonGL	FA 18:0 M-H Atlas --- Methyl Heptadecanoic acid M-H FiehnHILIC --- Stearic acid M-H FiehnHILIC --- Stearic acid M-H HMDB	Lipids and lipid-like molecules	Fatty Acyls	Fatty acids and conjugates	HMDB0000827	Stearic acid	Fatty Acyls [FA]	Fatty Acids and Conjugates [FA01] --- Fatty esters [FA07]	Straight chain fatty acids [FA0101]	LMFA01010018 --- LMFA07010473	Methyl heptadecanoate --- Stearic acid	FA 18:0 --- SFE 18:0		HUEBIMLTDXKIPR-UHFFFAOYSA-N, QIQXTHQIDYTFRH-UHFFFAOYSA-N	C18H36O2	1	M-H	283.265		1.27	1.26	100	14.375	100	100	-0.168356	0.12903	0.321454	-0.180083	0.205754	0.985013	-0.202182	0.473686	0.765052	0.0975656	0.397558	0.687921	-0.0981118	0.115923	0.382475
1-Methyladenosine	Purine nucleosides	HILIC_NegMS1_519			nonGL	1-Methyladenosine M-H FiehnHILIC --- 1-Methyladenosine M-H HMDB --- 2'-O-Methyladenosine M-H FiehnHILIC --- 2-O-Methyladenosine M-H FiehnHILIC --- N6-Methyladenosine M-H FiehnHILIC	Nucleosides, nucleotides, and analogues	Purine nucleosides		HMDB0003331	1-Methyladenosine								FPUGCISOLXNPPC-UHFFFAOYNA-N, GFYLSDSUCHVORB-IOSLPCCCSA-N, GFYLSDSUCHVORB-UHFFFAOYNA-N, IQZWKGWOBPJWMX-UHFFFAOYNA-N, VQAYFKKCNSOZKM-UHFFFAOYNA-N	C11H15N5O4	1	M-H	280.103		14.98	14.99	33.6043	29.7305	63.1579	100	0.171944	0.131547	0.326574	-0.0474792	0.746453	0.993093	0.109937	0.704946	0.765052	0.21041	0.074116	0.475	0.0507457	0.431068	0.537892
FA 20:0	FA - Fatty Acids and Conjugates	HILIC_NegMS1_622		Y	nonGL	Arachidic acid M-H FiehnHILIC --- Arachidic acid M-H HMDB --- FA 20:0 M-H Atlas	Lipids and lipid-like molecules	Fatty Acyls	Fatty acids and conjugates	HMDB0002212	Arachidic acid	Fatty Acyls [FA]	Fatty Acids and Conjugates [FA01]	Straight chain fatty acids [FA0101]	LMFA01010020	Arachidic acid	FA 20:0		VKOBVWXKNCXXDE-UHFFFAOYSA-N	C20H40O2	1	M-H	311.294		1.25	1.26	76.4228	14.1142	100	100	-0.168255	0.132484	0.327751	-0.236457	0.0984493	0.985013	-0.135135	0.635068	0.765052	0.0727735	0.531767	0.741659	-0.105655	0.0928541	0.363954
5-Hydroxy-L-tryptophan	Indoles and derivatives	HILIC_Pos, HILIC_NegMS1, MSMS_564, 333	RT_1		nonGL	5-Hydroxy-L-tryptophan M+H NIST, 5-Hydroxy-L-tryptophan M-H HMDB --- 5-Hydroxy-L-tryptophan M-H NIST --- 5-Hydroxytryptophan M-H FiehnHILIC	Organoheterocyclic compounds	Indoles and derivatives	Tryptamines and derivatives	HMDB0000472	5-Hydroxy-L-tryptophan								LDCYZAJDBXYCGN-VIFPVBQESA-N, LDCYZAJDBXYCGN-UHFFFAOYNA-N, LDCYZAJDBXYCGN-VIFPVBQESA-N	C11H12N2O3	1	M+H, M-H	221.0919, 219.0769		10.67	10.84	92.7027	11.5564	100	100	0.160305	0.134536	0.330474	0.0230818	0.867149	0.993093	-0.0081873	0.976062	0.782875	0.0670277	0.547635	0.750396	0.0548497	0.364744	0.499067
MAG 16:0	MAG	HILIC_PosMSMS_1125		Y	GL	1-Hexadecanoyl-sn-glycerol M+H NIST	Lipids and lipid-like molecules	Glycerolipids	Monoradylglycerols	HMDB0245964	3-Palmitoyl-sn-glycerol	Glycerolipids [GL]	Monoradylglycerols [GL01]	Monoacylglycerols [GL0101]	LMGL01010001	MG(16:0/0:0/0:0)[rac]	MG 16:0	MG 16:0	QHZLMUACJMDIAE-UHFFFAOYSA-N	C19H38O4	1	M+H	331.284		1.27	1.28	100	10.6867	100	100	-0.164975	0.135061	0.330474	-0.246384	0.0808229	0.985013	-0.347609	0.214585	0.765052	0.108298	0.345148	0.669896	-0.117028	0.0588182	0.336408
PE 36:1	PE	RP_Pos, RP_NegMSMS_797, 848, 913, 398		Y	nonGL	1-Stearoyl-2-oleoyl-sn-glycero-3-phosphoethanolamine M+H-H2O NIST, 1-Stearoyl-2-oleoyl-sn-glycero-3-phosphoethanolamine M+H NIST --- PE 18:0_18:1 M+H Atlas, PE 36:1 M+Na Atlas, PE 18:0_18:1 M-H Atlas	Lipids and lipid-like molecules	Glycerophospholipids	Glycerophosphoethanolamines	HMDB0008993, HMDB0256188	PE(18:0/18:1(9Z)) --- Stearoyl-oleoyl-phosphatidyl ethanolamine	Glycerophospholipids [GP]	Glycerophosphoethanolamines [GP02]	Diacylglycerophosphoethanolamines [GP0201]	LMGP02010036	PE(18:0/18:1(9Z))	PE 36:1	PE 18:0_18:1	JQKOHRZNEOQNJE-DJEJVYNPSA-N, JQKOHRZNEOQNJE-DJEJVYNPSA-N, JQKOHRZNEOQNJE-ZZEZOPTANA-N, LJTOUZKCYPAEIL-NXVVXOECNA-N, JQKOHRZNEOQNJE-ZZEZOPTANA-N	C41H80NO8P	1, 2	M+H-H2O, M+H, M+Na, M-H	728.5547, 746.5675, 768.5494, 744.5552	281.247	6.99	6.93	57.2581	12.9731	69.4656	100	0.162624	0.135316	0.330474	0.0792463	0.571783	0.988506	0.128843	0.642072	0.765052	0.0634225	0.5757	0.766286	0.0731994	0.233351	0.443666
PC O-36:2	PC-O	RP_Neg, RP_PosMSMS_594, 934		Y	nonGL	PC O-18:1_18:1 M+HCOO Atlas, 1-(1Z-Octadecenyl)-2-(9Z-octadecenoyl)-sn-glycero-3-phosphocholine M+H NIST	Lipids and lipid-like molecules	Glycerophospholipids	Glycerophosphocholines	HMDB0011243	PC(P-18:0/18:1(9Z))	Glycerophospholipids [GP]	Glycerophosphocholines [GP01]	1Z-alkenyl,2-acylglycerophosphocholines [GP0103]	LMGP01030013	PC(P-18:0/18:1(9Z))	PC O-36:2	PC P-18:0/18:1	SLADRSJRKVHHAA-YEUCEMRANA-N, DSWOVBIRJNAJAF-NVJOKYTBSA-N	C44H86NO7P	1	M+HCOO, M+H	816.6122, 772.617		7.025	7.015	53.6388	18.3704	96.1832	100	-0.164317	0.135453	0.330474	-0.17991	0.202603	0.985013	-0.195366	0.485326	0.765052	-0.216053	0.0571753	0.442848	-0.0964619	0.119301	0.382475
CAR 10:2	CAR	HILIC_PosMSMS_1036		Y	nonGL	CAR 10:2 M Atlas														C17H30NO4	1	M	312.217		2.01	2.01	94.0541	13.0377	100	100	0.157146	0.136226	0.331217	0.117269	0.387132	0.985013	0.0662878	0.805058	0.768914	0.0837899	0.444899	0.698434	0.0757167	0.202863	0.431003
PC 33:1	PC	RP_Pos, RP_NegMSMS_849, 911, 516		Y	nonGL	PC 15:0_18:1 M+H Atlas --- PC 16:0_17:1 M+H Atlas --- PC 17:0_16:1 M+H Atlas, PC 33:1 M+Na Atlas, PC 15:0_18:1 M+HCOO Atlas --- PC 16:0_17:1 M+HCOO Atlas	Lipids and lipid-like molecules	Glycerophospholipids	Glycerophosphocholines	HMDB0007939	PC(15:0/18:1(9Z))	Glycerophospholipids [GP]	Glycerophosphocholines [GP01]	Diacylglycerophosphocholines [GP0101]	LMGP01010571 --- LMGP01011415 --- LMGP01011502, LMGP01011502, LMGP01010571 --- LMGP01011415	PC(15:0/18:1(9Z)) --- PC(16:0/17:1(9Z)) --- PC(17:0/16:1(9Z)), PC(17:0/16:1(9Z)), PC(15:0/18:1(9Z)) --- PC(16:0/17:1(9Z))	PC 33:1	PC 15:0_18:1 --- PC 16:0_17:1 --- PC 16:1_17:0, PC 16:1_17:0, PC 15:0_18:1 --- PC 16:0_17:1	ASFWPRURQHKRSL-ZZEZOPTANA-N, DISVYZNGGMDUPX-ZPHPHTNENA-N, ZEWLMKXMNQOCOQ-MRCUWXFGNA-N, DISVYZNGGMDUPX-ZPHPHTNENA-N, ASFWPRURQHKRSL-ZZEZOPTANA-N, ZEWLMKXMNQOCOQ-MRCUWXFGNA-N	C41H80NO8P	1, 2	M+H, M+Na, M+HCOO	746.565, 768.5513, 790.5582	709.4747, 267.2318	6.07	6.06	90.0538	17.8378	100	100	0.170048	0.137	0.331958	0.0741068	0.614653	0.993093	0.346122	0.232999	0.765052	0.0998348	0.401028	0.68941	0.0852919	0.185674	0.424651
Hex2Cer 34:1;O2	Hex2Cer	RP_Neg, RP_PosMSMS, MS1_740, 1222		Y	nonGL	Hex2Cer 34:1;2O M+HCOO Atlas, Hex2Cer 16:0;2O/18:1 M+H Atlas --- Hex2Cer 16:1;2O/18:0 M+H Atlas --- Hex2Cer 17:0;2O/17:1 M+H Atlas --- Hex2Cer 17:1;2O/17:0 M+H Atlas --- Hex2Cer 18:0;2O/16:1 M+H Atlas --- Hex2Cer 18:1;2O/16:0 M+H Atlas --- Hex2Cer 19:0;2O/15:1 M+H Atlas --- Hex2Cer 19:1;2O/15:0 M+H Atlas --- Hex2Cer 20:0;2O/14:1 M+H Atlas --- Hex2Cer 20:1;2O/14:0 M+H Atlas --- HexCer 11:1;2O/36:1…	Lipids and lipid-like molecules	Sphingolipids	Glycosphingolipids	HMDB0004833, HMDB0006750	Galabiosylceramide (d18:1/16:0) --- LacCer(d18:1/16:0)	Sphingolipids [SP]	Neutral glycosphingolipids [SP05]	Gal- (Gala series) [SP0509] --- Simple Glc series (GlcCer, LacCer, etc.) [SP0501]	LMSP0501AB03 --- LMSP0501AD01 --- LMSP0509AA01	LacCer(d18:1/16:0)	Hex2Cer 34:1;O2	LacCer 18:1;O2/16:0	OMKYKHZREJHWTL-QVIHXGFCNA-N, WHFWLXHFEZNUFX-PFONDFGANA-N, ATNQLANPQBXMBW-MSUUIHNZNA-N, FADNPUUESIQRPZ-BENRWUELNA-N, HLIJNIKSBCIDGO-ORIPQNMZNA-N, OOEVLOCUJFQASU-ORIPQNMZNA-N, PCOYXPGDIRMBSD-ORIPQNMZNA-N, PDABVOULTBGFIS-ORIPQNMZNA-N, PMXXSLBGJSBWTL-OWBHPGMINA-N, QDXMQQRTPRIQPZ-PEZBUJJGNA-N, QISLXWJHWXYMRC-SEEYIZPENA-N, RYWMWMUBDUSGBL-VNBLWANQNA-N, RZUCJWWILYOANS-ICFOKQHNNA-N, VVFYZSAKTCOAAB-LSJFCJD…	C46H87NO13	2, 1	M+HCOO, M+H	906.6157, 862.623	179.054	5.41	5.405	65.5914	26.3632	96.1832	100	-0.153175	0.137648	0.33239	-0.176046	0.18332	0.985013	-0.171192	0.514288	0.765052	-0.0841787	0.432667	0.695343	-0.090991	0.116958	0.382475
SM 38:2;O2	SM	RP_Neg, RP_PosMSMS, MS1_555, 952, 882		Y	nonGL	SM 36:2;2O/2:0 M+HCOO Atlas, SM 38:2;2O M+Na Atlas, SM 10:0;2O/28:2 M+H Atlas --- SM 10:1;2O/28:1 M+H Atlas --- SM 12:0;2O/26:2 M+H Atlas --- SM 12:1;2O/26:1 M+H Atlas --- SM 12:2;2O/26:0 M+H Atlas --- SM 13:2;2O/25:0 M+H Atlas --- SM 14:0;2O/24:2 M+H Atlas --- SM 14:1;2O/24:1 M+H Atlas --- SM 14:2;2O/24:0 M+H Atlas --- SM 15:2;2O/23:0 M+H Atlas --- SM 16:0;2O/22:2 M+H Atlas --- SM 16:1;2O/22:1 M…	Lipids and lipid-like molecules	Sphingolipids	Phosphosphingolipids	HMDB0240610	SM(d18:1/20:1(11Z))	Glycerolipids [GL] --- Sphingolipids [SP]	Phosphosphingolipids [SP03] --- Triradylglycerols [GL03]	Ceramide phosphocholines (sphingomyelins) [SP0301] --- Triacylglycerols [GL0301]	LMGL03012644 --- LMGL03013187 --- LMGL03013269 --- LMSP03010058 --- LMSP03010059	SM(d16:1/22:1) --- SM(d18:1/20:1) --- TG(12:0/12:0/19:1(9Z))[iso3] --- TG(12:0/13:0/18:1(9Z))[iso6] --- TG(12:0/15:0/16:1(9Z))[iso6]	SM 38:2;O2 --- TG 43:1	SM 16:1;O2/22:1 --- SM 18:1;O2/20:1 --- TG 12:0_12:0_19:1 --- TG 12:0_13:0_18:1 --- TG 12:0_15:0_16:1	HHUOBTZXQBFAHH-VIEZPANLNA-N, LBEZWQZVIFGBTP-NFYLBXPENA-N, AGVQEZBXISETOP-FVYVZGATNA-N, AJVVEGLZACEZIS-VQEGRBLQNA-N, AODKHRQKSHISJH-YQBFZXKRNA-N, BCCPMXGGDNXBOP-QINSGFPZNA-N, BYNNVNDPBQKSIU-QCVIXQMPNA-N, BZZQMAXBKKYKAW-VZCXRCSSNA-N, CVDHFXUFZSGSIB-GWRCKUBUNA-N, DCKSDHLMPIZJGP-QCVIXQMPNA-N, DLQOOQIWGMLCTO-UHRQUHAFNA-N, FLNNFKHNOABOIO-YLQHPHCVNA-N, GKWJYHGIRPQDSW-FCQUAONHNA-N, GLSRTVMFILKDDB-WGKWKPJ…	C43H85N2O6P, C43H85N2O6P, C46H86O6	2, 1	M+HCOO, M+Na, M+H --- M+Na	801.613, 779.6005, 757.6168	741.59	6.28	6.29	69.086	25.0573	100	100	-0.167015	0.139381	0.335038	-0.27877	0.0531703	0.985013	-0.0458353	0.87344	0.769105	-0.294268	0.0110364	0.309502	-0.109023	0.0859195	0.363249
PE 36:2	PE	RP_Pos, RP_NegMSMS_843, 902, 392		Y	nonGL	1,2-Di-(9Z-octadecenoyl)-sn-glycero-3-phosphoethanolamine M+H NIST --- 1-Stearoyl-2-linoleoyl-sn-glycero-3-phosphoethanolamine M+H NIST --- PE 18:0_18:2 M+H Atlas, 1,2-Di-(9Z-octadecenoyl)-sn-glycero-3-phosphoethanolamine M+Na NIST --- PE 36:2 M+Na Atlas, PE 18:0_18:2 M-H Atlas	Lipids and lipid-like molecules	Glycerophospholipids	Glycerophosphoethanolamines	HMDB0008994, HMDB0009059	PE(18:0/18:2(9Z,12Z)) --- PE(18:1(9Z)/18:1(9Z))	Glycerophospholipids [GP]	Glycerophosphoethanolamines [GP02]	Diacylglycerophosphoethanolamines [GP0201]	LMGP02010044 --- LMGP02010052, LMGP02010052, LMGP02010044	PE(18:0/18:2(9Z,12Z)) --- PE(18:1(9Z)/18:1(9Z)), PE(18:1(9Z)/18:1(9Z)), PE(18:0/18:2(9Z,12Z))	PE 36:2	PE 18:0_18:2 --- PE 18:1_18:1, PE 18:1_18:1, PE 18:0_18:2	MWRBNPKJOOWZPW-NYVOMTAGSA-N, YDTWOEYVDRKKCR-KNERPIHHSA-N, YDTWOEYVDRKKCR-MLWYYCKJNA-N, MWRBNPKJOOWZPW-NYVOMTAGSA-N, NHOFXTMUIVDIHI-QGLGPCELNA-N, YDTWOEYVDRKKCR-MLWYYCKJNA-N	C41H78NO8P	2	M+H, M+Na, M-H	744.5497, 766.5311, 742.5397	603.5302, 625.5167, 283.2631	6.55	6.51	98.6559	18.6641	96.1832	100	0.169596	0.139692	0.335038	-0.0251181	0.86513	0.993093	0.132578	0.650126	0.765052	0.0929312	0.436372	0.695343	0.0554383	0.392805	0.511007
L-N5-(1-Imino-3-pentenyl) ornithine	Xenobiotics	HILIC_PosMSMS_486			nonGL	L-N5-(1-Imino-3-pentenyl) ornithine M+H-NH3 NIST													JUSNBVJTFYDFKR-SGJFDWMWSA-N	C10H19N3O2	2	M+H-NH3	197.128	70.064	9.78	9.78	29.4595	20.3637	32.3308	100	-0.168042	0.141606	0.338483	-0.0901381	0.54004	0.985013	-0.351978	0.224967	0.765052	0.0918987	0.439467	0.695343	-0.0880412	0.171617	0.413096
FA 5:0	FA - Fatty Acids and Conjugates	HILIC_NegMS1_13		Y	nonGL	FA 5:0 M-H Atlas	Lipids and lipid-like molecules	Fatty Acyls	Fatty acids and conjugates	HMDB0000892	Valeric acid	Fatty Acyls [FA]	Fatty Acids and Conjugates [FA01]	Straight chain fatty acids [FA0101]	LMFA01010005	Valeric acid	FA 5:0		NQPDZGIKBAWPEJ-UHFFFAOYSA-N	C5H10O2	1	M-H	101.061		4.3	4.37	55.2846	19.2356	69.1729	100	0.151202	0.142322	0.339048	0.0319671	0.80964	0.993093	0.0733126	0.77993	0.765052	0.0186874	0.861743	0.825812	0.0577068	0.321276	0.478407
Creatine	Amino acids, peptides, and analogues	HILIC_Pos, HILIC_NegMSMS_167, 62			nonGL	Creatine M+H HMDB --- Creatine M+H NIST, Creatine M-H HMDB	Organic acids and derivatives	Carboxylic acids and derivatives	Amino acids, peptides, and analogues	HMDB0000064	Creatine								CVSVTCORWBXHQV-UHFFFAOYSA-N	C4H9N3O2	1	M+H, M-H	132.0762, 130.0616		13.46	13.44	67.8378	13.0664	100	100	0.165702	0.143491	0.33968	-0.0376157	0.796475	0.993093	0.0236972	0.93452	0.774203	0.120463	0.305801	0.654154	0.0464127	0.468464	0.562486
LPE O-16:1	LPE-O	HILIC_NegMSMS_950		Y	nonGL	LPE O-16:1 M-H Atlas													RRTPYUGIBQLEDN-FPLPWBNLNA-N	C21H44NO6P	1	M-H	436.281		8.83	8.81	32.7913	24.6879	56.391	100	-0.156246	0.143548	0.33968	-0.0942247	0.492872	0.985013	-0.446814	0.0981397	0.765052	0.0836729	0.451242	0.703319	-0.089777	0.135339	0.388039
FA 20:2;O3 --- FA 20:3;O2	FA - Eicosanoids	RP_PosMS1_75		Y	nonGL	(.+/-.)-5,6-Dihydroxy-8Z,11Z,14Z-eicosatrienoic acid M+H NIST --- 11,12-Dihydroxy-5Z,8Z,14Z-eicosatrienoic acid M+H NIST --- 13,14-Dihydro-15(R)-prostaglandin E1 M+H-H2O NIST --- 14,15-Dihydroxy-5Z,8Z,11Z-eicosatrienoic acid M+H NIST --- 8,9-Dihydroxy-5Z,11Z,14Z-eicosatrienoic acid M+H NIST --- 9S,11R,15S-Trihydroxy-13E-prostaenoic acid M+H-H2O NIST --- 9S,11R,15S-Trihydroxy-5Z-prostenoic acid M+…	Lipids and lipid-like molecules	Fatty Acyls	Eicosanoids	HMDB0002311, HMDB0002343, HMDB0002685	8,9-DiHETrE --- 5,6-DHET --- Prostaglandin F1a	Fatty Acyls [FA]	Eicosanoids [FA03]	Hydroxy/hydroperoxyeicosatrienoic acids [FA0305] --- Prostaglandins [FA0301]	LMFA03010079 --- LMFA03010137 --- LMFA03010168 --- LMFA03050004 --- LMFA03050006	(+/-)5,6-DiHETrE --- (+/-)8,9-DiHETrE --- 13,14-dihydro-15-keto-PGF1alpha --- 13,14-dihydro-PGF2alpha --- PGF1alpha	FA 20:2;O3 --- FA 20:3;O2		DCJBINATHQHPKO-TYAUOURKSA-N, DPOINJQWXDTOSF-YWTNHNAXSA-N, DZUXGQBLFALXCR-CDIPTNKSSA-N, FVPKMMQYALWZHV-AKHDSKFASA-N, GFNYAPAJUNPMGH-QNEBEIHSSA-N, LLQBSJQTCKVWTD-NFUXFLSFSA-N, LRPPQRCHCPFBPE-LZXKBWHHSA-N, SYAWGTIVOGUZMM-KZTFMOQPSA-N	C20H34O4, C20H36O5	1	M+H --- M+H-H2O	339.249		3.28	3.27	100	13.7348	100	100	-0.165199	0.145174	0.342384	-0.133156	0.360858	0.985013	0.156717	0.587035	0.765052	0.0887869	0.451426	0.703319	-0.0703214	0.271723	0.451988
TAG 60:12	TAG	RP_PosMSMS_1477, 1486		Y	GL	TG 16:0_22:6_22:6 M+NH4 Atlas --- TG 18:2_20:4_22:6 M+NH4 Atlas --- TG 20:4_20:4_20:4 M+NH4 Atlas, TG 16:0_22:6_22:6 M+Na Atlas --- TG 18:2_20:4_22:6 M+Na Atlas --- TG 20:4_20:4_20:4 M+Na Atlas	Lipids and lipid-like molecules	Glycerolipids	Triradylcglycerols	HMDB0055661	TG(20:4(8Z,11Z,14Z,17Z)/20:4(8Z,11Z,14Z,17Z)/20:4(8Z,11Z,14Z,17Z))								SSTFWICCEAKSBO-ZHKGMDDBSA-N, VLEDHTUUVAXNOJ-QPPLYHLQNA-N, VVQOCJRHOCGAET-FTSCXLDQNA-N	C63H98O6	1	M+NH4, M+Na	968.7635, 973.7198		10.1	10.08	77.957	9.9507	97.7099	100	0.158294	0.148185	0.348325	0.0981034	0.485935	0.985013	0.101595	0.715401	0.765052	-0.0520602	0.647665	0.785372	0.0741231	0.229797	0.443666
LPC 18:1	LPC	RP_Pos, RP_NegMSMS_371, 393, 427, 450, 182		Y	nonGL	1-(9Z-Octadecenoyl)-sn-glycero-3-phosphocholine M+H-H2O NIST, 1-(9Z-Octadecenoyl)-sn-glycero-3-phosphocholine M+H NIST --- PC O-18:1 M+H Atlas, 1-(9Z-Octadecenoyl)-sn-glycero-3-phosphocholine M+Na NIST --- LPC 18:1 M+Na Atlas, 1-(9Z-Octadecenoyl)-sn-glycero-3-phosphocholine M+K NIST, LPC 18:1 M+HCOO Atlas	Lipids and lipid-like molecules	Glycerophospholipids	Glycerophosphocholines	HMDB0002815	LysoPC(18:1(9Z)/0:0)	Glycerophospholipids [GP]	Glycerophosphocholines [GP01]	Monoacylglycerophosphocholines [GP0105]	LMGP01050032, LMGP01050030 --- LMGP01050032 --- LMGP01050114	PC(18:1(9Z)/0:0), PC(18:1(9E)/0:0) --- PC(18:1(9Z)/0:0) --- PC(18:1(9Z)/0:0)[rac]	LPC 18:1	LPC 18:1	YAMUFBLWGFFICM-PTGWMXDISA-N, YAMUFBLWGFFICM-PTGWMXDISA-N, ZXKRRQJZHGEFOW-KHPPLWFENA-N, YAMUFBLWGFFICM-PTGWMXDISA-N, YAMUFBLWGFFICM-SEYXRHQNNA-N, YAMUFBLWGFFICM-SEYXRHQNNA-N	C26H52NO7P	1, 2	M+H-H2O, M+H, M+Na, M+K, M+HCOO	504.34, 522.3534, 544.3351, 560.3089, 566.3467	506.32	2.96	2.98	80.6452	16.6669	100	100	-0.156703	0.149612	0.349806	-0.0455023	0.745164	0.993093	-0.100867	0.715556	0.765052	-0.14659	0.193527	0.597057	-0.0634249	0.30141	0.469318
MAG 18:2	MAG	HILIC_PosMSMS_1236		Y	GL	1-Linoleoylglycerol M+H NIST	Lipids and lipid-like molecules	Fatty Acyls	Lineolic acids and derivatives	HMDB0011568, HMDB0242115	MG(18:2(9Z,12Z)/0:0/0:0) --- Glyceryl monolinoleate	Glycerolipids [GL]	Monoradylglycerols [GL01]	Monoacylglycerols [GL0101]	LMGL01010006	MG(18:2(9Z,12Z)/0:0/0:0)[rac]	MG 18:2	MG 18:2	WECGLUPZRHILCT-KKFOGOCZSA-N	C21H38O4	1	M+H	355.284		1.29	1.3	100	7.85187	100	100	-0.159571	0.150095	0.349806	-0.251998	0.0752076	0.985013	-0.337353	0.230381	0.765052	0.0907079	0.431253	0.695343	-0.115893	0.0624076	0.336408
N-Stearoyltaurine	N-acyl amines	HILIC_NegMS1_846	RT_2		nonGL	N-Stearoyltaurine M-H NIST	Lipids and lipid-like molecules	Fatty Acyls	Fatty amides	HMDB0240595	N-Stearoyltaurine	Fatty Acyls [FA]	Fatty amides [FA08]	N-acyl amines [FA0802]	LMFA08020078	N-stearoyl taurine	NAT 18:0		LMIJIHJZVURGQK-UHFFFAOYSA-N	C20H41NO4S	1	M-H	390.265		6.54	6.55	32.2493	16.4994	51.1278	100	0.161767	0.150299	0.349806	-0.0867668	0.548668	0.9863	-0.167822	0.55744	0.765052	0.00696153	0.952584	0.835284	0.0262137	0.680247	0.635953
FA 4:0;O	FA - Fatty Acids and Conjugates	HILIC_NegMSMS_17		Y	nonGL	2-Hydroxybutyric acid M-H HMDB --- 2-Hydroxyisobutyric acid M-H FiehnHILIC --- 3-Hydroxybutyric acid M-H FiehnHILIC --- alpha-Hydroxyisobutyric acid M-H HMDB	Organic acids and derivatives	Hydroxy acids and derivatives	Alpha hydroxy acids and derivatives	HMDB0000008, HMDB0000729	2-Hydroxybutyric acid --- alpha-Hydroxyisobutyric acid	Fatty Acyls [FA]	Fatty Acids and Conjugates [FA01]	Hydroxy fatty acids [FA0105]	LMFA01050342 --- LMFA01050417	2S-Hydroxybutanoic acid --- alpha-hydroxy-isobutyric acid	FA 4:0;O		AFENDNXGAFYKQO-VKHMYHEASA-N, BWLBGMIXKSTLSX-UHFFFAOYSA-N, WHBMMWSBFZVSSR-UHFFFAOYNA-N	C4H8O3	1	M-H	103.04		2.89	2.89	94.3089	13.4853	100	100	-0.161303	0.150838	0.34991	-0.13565	0.347035	0.985013	-0.439999	0.121514	0.765052	0.0544554	0.641137	0.785372	-0.0990429	0.116753	0.382475
5-Hydroxyindole --- Indoxyl --- 1,3-Dihydro-(2H)-indol-2-one	Indoles and derivatives	HILIC_PosMSMS_180			nonGL	1,3-Dihydro-(2H)-indol-2-one M+H HMDB --- 5-Hydroxyindole M+H HMDB	Organoheterocyclic compounds	Indoles and derivatives	Hydroxyindoles --- Indolines	HMDB0004094, HMDB0059805, HMDB0061918	Indoxyl --- 5-Hydroxyindole --- 1,3-Dihydro-(2H)-indol-2-one								JYGFTBXVXVMTGB-UHFFFAOYSA-N, LMIQERWZRIFWNZ-UHFFFAOYSA-N	C8H7NO	1	M+H	134.06		7.43	7.45	35.1351	15.2631	97.7444	100	0.155134	0.151525	0.350356	-0.125427	0.366843	0.985013	0.258173	0.347449	0.765052	-0.019644	0.861507	0.825812	0.0376876	0.53767	0.591437
LPA 18:2	LPA	HILIC_NegMSMS_938		Y	nonGL	LPA 18:2 M-H Atlas	Lipids and lipid-like molecules	Glycerophospholipids	Glycerophosphates	HMDB0007856	LysoPA(18:2(9Z,12Z)/0:0)	Glycerophospholipids [GP]	Glycerophosphates [GP10]	Monoacylglycerophosphates [GP1005]	LMGP10050017	PA(18:2(9Z,12Z)/0:0)	LPA 18:2	LPA 18:2	ZQTAMPRZFOOEEP-HZJYTTRNNA-N	C21H39O7P	1	M-H	433.234		8.68	8.7	59.8916	23.3014	93.985	100	-0.162812	0.153713	0.354256	0.0507034	0.729977	0.993093	-0.396934	0.169874	0.765052	0.244718	0.0373191	0.419009	-0.0614054	0.340546	0.488223
2-Aminoadipic acid	Amino acids, peptides, and analogues	HILIC_PosMS1_220			nonGL	DL-2-Methylglutamic acid M+H-H2O NIST --- Hexanedioic acid, 2-amino- M+H-H2O NIST --- N-Ethylmaleimide M+H+H2O NIST	Organic acids and derivatives	Carboxylic acids and derivatives	Amino acids, peptides, and analogues	HMDB0302754	2-Aminoadipic acid	Fatty Acyls [FA]	Fatty Acids and Conjugates [FA01]	Dicarboxylic acids [FA0117]	LMFA01170098	Aminoadipic acid			HDFGOPSGAURCEO-UHFFFAOYSA-N, OYIFNHCXNCRBQI-UHFFFAOYSA-N, QHSCIWIRXWFIGH-UHFFFAOYSA-N	C6H11NO4, C6H7NO2	1	M+H+H2O --- M+H-H2O	144.063		15.32	15.31	71.3514	15.232	98.4962	100	-0.161885	0.155096	0.355009	-0.203034	0.163994	0.985013	-0.668394	0.0194043	0.765052	0.114082	0.334662	0.665816	-0.123522	0.0529283	0.336408
TAG 57:10	TAG	RP_PosMS1_1408		Y	GL	DGGA 17:0_27:0 M+NH4 Atlas --- DGGA 18:0_26:0 M+NH4 Atlas --- DGGA 19:0_25:0 M+NH4 Atlas --- DGGA 20:0_24:0 M+NH4 Atlas --- DGGA 21:0_23:0 M+NH4 Atlas --- DGGA 22:0_22:0 M+NH4 Atlas --- TG 10:0_11:0_36:10 M+NH4 Atlas --- TG 10:0_13:1_34:9 M+NH4 Atlas --- TG 10:0_15:1_32:9 M+NH4 Atlas --- TG 10:0_17:2_30:8 M+NH4 Atlas --- TG 11:0_14:1_32:9 M+NH4 Atlas --- TG 11:0_16:2_30:8 M+NH4 Atlas --- TG 11:0_…	Lipids and lipid-like molecules	Glycerolipids	Triradylcglycerols	HMDB0043712, HMDB0043740	TG(15:0/20:4(8Z,11Z,14Z,17Z)/22:6(4Z,7Z,10Z,13Z,16Z,19Z)) --- TG(15:0/20:5(5Z,8Z,11Z,14Z,17Z)/22:5(7Z,10Z,13Z,16Z,19Z))	Glycerolipids [GL]	Triradylglycerols [GL03]	Triacylglycerols [GL0301]	LMGL03011093 --- LMGL03011303 --- LMGL03011309 --- LMGL03011310 --- LMGL03012751 --- LMGL03015326 --- LMGL03015949 --- LMGL03016031 --- LMGL03016574	TG(13:0/22:5(7Z,10Z,13Z,16Z,19Z)/22:5(7Z,10Z,13Z,16Z,19Z))[iso3] --- TG(15:0/20:5(5Z,8Z,11Z,14Z,17Z)/22:5(7Z,10Z,13Z,16Z,19Z))[iso6] --- TG(17:0/18:4(6Z,9Z,12Z,15Z)/22:6(4Z,7Z,10Z,13Z,16Z,19Z))[iso6] --- TG(17:0/20:5(5Z,8Z,11Z,14Z,17Z)/20:5(5Z,8Z,11Z,14Z,17Z))[iso3] --- TG(17:1(9Z)/18:3(9Z,12Z,15Z)/22:6(4Z,7Z,10Z,13Z,16Z,19Z))[iso6] --- TG(17:1(9Z)/18:4(6Z,9Z,12Z,15Z)/22:5(7Z,10Z,13Z,16Z,19Z))[is…	TG 57:10	TG 13:0_22:5_22:5 --- TG 15:0_20:5_22:5 --- TG 17:0_18:4_22:6 --- TG 17:0_20:5_20:5 --- TG 17:1_18:3_22:6 --- TG 17:1_18:4_22:5 --- TG 17:2_18:2_22:6 --- TG 17:2_18:3_22:5 --- TG 18:4_19:1_20:5	AASYHQUIIWQAME-NPLOLFCONA-N, ALZNPNOGKFUSNJ-GPSIMCJLNA-N, ANSKLVDHBRJQPP-NXTNBXLWNA-N, AOJRSUBSKBEIEZ-LTFNYHSZNA-N, AOUFRGGRUYVGKH-COWWSZQRNA-N, ASBDUKULYPPCGE-AHIYUYSHNA-N, ASPQSVUSLUCKAX-GPYZMMRYNA-N, AYUCGYXYJUDZGW-BFWJQUJUNA-N, BHTNWPNYUDLNBU-JZWYWRAPNA-N, BPMUBNDIWDUJLB-XYAOSZBNNA-N, BVYKHTAJCGASSD-IFZDTKGONA-N, BZQNWKBWHNGKJA-RGXKRFOYNA-N, CAVGZHNCGXHLGL-JRFCRFNJNA-N, CDHSCZXLLGFEGO-BRDHJHF…	C60H96O6	1	M+NH4	930.754		10.81	10.79	99.1935	10.0818	100	100	0.158071	0.155266	0.355009	-0.0266424	0.85239	0.993093	0.0909015	0.748116	0.765052	-0.138512	0.229874	0.62499	0.0494333	0.431418	0.537892
1-Methyluric acid	Purines and purine derivatives	HILIC_NegMSMS_244			nonGL	1-Methyluric acid M-H HMDB	Organoheterocyclic compounds	Imidazopyrimidines	Purines and purine derivatives	HMDB0003099	1-Methyluric acid								QFDRTQONISXGJA-UHFFFAOYSA-N	C6H6N4O3	1	M-H	181.036		9.4	9.41	49.3225	25.7068	98.4962	100	-0.153844	0.155545	0.355009	-0.211334	0.127455	0.985013	-0.467854	0.087436	0.765052	0.21862	0.0502846	0.442848	-0.112671	0.0636906	0.336408
Hydroxyurea	Carboximidic acids and derivatives	HILIC_PosMS1_20	RT_3		nonGL	Hydroxyurea M+H NIST	Organic acids and derivatives	Carboximidic acids and derivatives		HMDB0015140	Hydroxyurea								VSNHCAURESNICA-UHFFFAOYSA-N	CH4N2O2	1	M+H	77.0382		10.18	10.19	99.7297	9.24416	99.2481	100	-0.160969	0.156288	0.355558	0.00556888	0.969611	0.998614	-0.483474	0.0920626	0.765052	0.0346558	0.769308	0.806258	-0.0738123	0.248968	0.444224
FA 18:1	FA - Fatty Acids and Conjugates	HILIC_Pos, HILIC_NegMSMS, MS1_870, 523		Y	nonGL	6-Octadecenoic acid, (Z)- M+H NIST, FA 18:1 M-H Atlas --- Oleic acid M-H FiehnHILIC --- Oleic acid M-H HMDB --- Oleic acid; FAB-EBEB; MS2; m/z M-H MassBank --- Vaccenic acid M-H FiehnHILIC --- cis-Vaccenic acid M-H HMDB	Lipids and lipid-like molecules	Fatty Acyls	Fatty acids and conjugates	HMDB0000207, HMDB0062703, HMDB0240219, HMDB0244344	Oleic acid --- Octadec-9-enoic Acid --- cis-Vaccenic acid --- 11-Aoctadecenoic acid	Fatty Acyls [FA]	Fatty Acids and Conjugates [FA01]	Unsaturated fatty acids [FA0103]	LMFA01030066, LMFA01030002 --- LMFA01030076	Petroselinic acid, Oleic acid --- cis-vaccenic acid	FA 18:1		CNVZJPUDSLNTQU-SEYXRHQNSA-N, UWHZIFQPPBDJPM-FPLPWBNLSA-N, UWHZIFQPPBDJPM-UHFFFAOYSA-N, ZQPPMHVWECSIRJ-KTKRTIGZSA-N, ZQPPMHVWECSIRJ-UHFFFAOYSA-N	C18H34O2	1	M+H, M-H	283.2628, 281.2482		1.365	1.335	100	3.08514	100	100	-0.156199	0.15892	0.356612	-0.412415	0.00314882	0.923985	-0.541633	0.0527256	0.765052	-0.151531	0.187263	0.589863	-0.155895	0.0115635	0.245949
Indoxyl glucuronide	Carbohydrates and carbohydrate conjugates	HILIC_NegMS1_609	RT_1		nonGL	Indoxyl glucuronide M-H HMDB	Organic oxygen compounds	Organooxygen compounds	Carbohydrates and carbohydrate conjugates	HMDB0010319	Indoxyl glucuronide								KUYNOZVWCFXSNE-BYNIDDHOSA-N	C14H15NO7	1	M-H	308.072		7.13	7.16	78.0488	15.5303	98.4962	100	-0.158869	0.159797	0.356612	-0.148027	0.307659	0.985013	-0.552655	0.0524563	0.765052	0.171869	0.141817	0.542199	-0.106226	0.0942817	0.363954
Shikimic acid --- L-Arabitol	Alcohols and polyols --- Carbohydrates and carbohydrate conjugates	HILIC_PosMS1_401			nonGL	D-(+)-Arabitol M+Na NIST --- L-Arabinitol M+Na NIST --- L-Thiocitrulline M+H-NH3 NIST --- Ribitol; LC-ESI-ITFT; MS2; m/z M+Na MassBank --- Shikimic acid M+H HMDB	Organic oxygen compounds	Organooxygen compounds	Carbohydrates and carbohydrate conjugates --- Alcohols and polyols	HMDB0003070, HMDB0001851	L-Arabitol --- Shikimic acid								BKGWACHYAMTLAF-BYPYZUCNSA-N, HEBKCHPVOIAQTA-QWWZWVQMSA-N, HEBKCHPVOIAQTA-UHFFFAOYSA-N, HEBKCHPVOIAQTA-ZXFHETKHNA-N, JXOHGGNKMLTUBP-HSUXUTPPSA-N	C5H12O5, C7H10O5	1	M+H --- M+H-NH3 --- M+Na	175.053		2.77	2.61	21.3514	13.4382	57.8947	99.1228	-0.15759	0.160062	0.356612	-0.0946642	0.511654	0.985013	-0.275146	0.334098	0.765052	0.190467	0.100503	0.513382	-0.0818085	0.195459	0.430857
PC 37:5	PC	RP_PosMSMS_1002		Y	nonGL	PC 15:0_22:5 M+H Atlas --- PC 17:1_20:4 M+H Atlas --- PC 19:0_18:5 M+H Atlas	Lipids and lipid-like molecules	Glycerophospholipids	Glycerophosphocholines	HMDB0007957	PC(15:0/22:5(7Z,10Z,13Z,16Z,19Z))								GGSPKQXXUZFLNX-BRBHEONNNA-N, NTTKGYVTNQTIRQ-MVYLFEMBNA-N, URYYGMVXBWUJFP-ATCRTNRPNA-N	C45H80NO8P	1	M+H	794.564		5.62	5.61	34.9462	12.9487	81.6794	100	0.152339	0.160284	0.356612	0.0159931	0.90883	0.997945	0.223238	0.418114	0.765052	-0.188295	0.0930939	0.508125	0.0623874	0.30814	0.473052
D-Lactic acid	Other organic acids and derivatives	HILIC_NegMSMS_9	RT_2		nonGL	D-Lactic acid M-H HMDB	Organic acids and derivatives	Hydroxy acids and derivatives	Alpha hydroxy acids and derivatives	HMDB0001311	D-Lactic acid								JVTAAEKCZFNVCJ-UWTATZPHSA-N	C3H6O3	1	M-H	89.0243		11.89	11.9	8.94309	12.5464	13.5338	100	-0.154498	0.160385	0.356612	-0.213493	0.129619	0.985013	-0.52199	0.0601225	0.765052	0.30895	0.00598789	0.283279	-0.115969	0.0602169	0.336408
Norleucine	Amino acids, peptides, and analogues	HILIC_NegMSMS_65			nonGL	DL-Norleucine M-H HMDB	Organic acids and derivatives	Carboxylic acids and derivatives	Amino acids, peptides, and analogues	HMDB0251526	DL-Norleucine								LRQKBLKVPFOOQJ-UHFFFAOYSA-N	C6H13NO2	1	M-H	130.088		10.35	10.34	100	9.33549	100	100	-0.159132	0.160609	0.356612	-0.130785	0.369413	0.985013	-0.450283	0.116559	0.765052	0.0975013	0.408034	0.69273	-0.0979234	0.124726	0.388039
FA 18:1;O2	FA - Fatty Acids and Conjugates	HILIC_NegMSMS_631		Y	nonGL	12,13-DiHOME M-H NIST --- 9,10-Dihydroxy-12Z-octadecenoic acid M-H NIST --- Octadecanedioic acid M-H FiehnHILIC	Lipids and lipid-like molecules	Fatty Acyls	Fatty acids and conjugates	HMDB0000782	Octadecanedioic acid	Fatty Acyls [FA]	Fatty Acids and Conjugates [FA01]	Dicarboxylic acids [FA0117]	LMFA01170029	Octadecanedioic acid	FA 18:1;O2		BNJOQKFENDDGSC-UHFFFAOYSA-N, CQSLTKIXAJTQGA-GJGKEFFFSA-N, XEBKSQSGNGRGDW-CJWPDFJNSA-N	C18H34O4	1	M-H	313.237		1.77	1.79	98.645	20.4731	98.4962	100	-0.158517	0.161001	0.356612	-0.130812	0.3679	0.985013	-0.369772	0.197055	0.765052	-0.0564607	0.631251	0.785372	-0.093757	0.1406	0.394605
TAG 51:4	TAG	RP_PosMSMS_1210, 1231		Y	GL	TG 15:0_18:2_18:2 M+NH4 Atlas --- TG 15:1_18:1_18:2 M+NH4 Atlas --- TG 16:1_17:1_18:2 M+NH4 Atlas, TG 15:0_18:1_18:3 M+Na Atlas --- TG 15:0_18:2_18:2 M+Na Atlas --- TG 16:1_17:1_18:2 M+Na Atlas	Lipids and lipid-like molecules	Glycerolipids	Triradylcglycerols	HMDB0011711, HMDB0011709, HMDB0011711	TG(15:0/18:1(9Z)/18:3(9Z,12Z,15Z)) --- TG(15:0/18:2(9Z,12Z)/18:2(9Z,12Z))	Glycerolipids [GL]	Triradylglycerols [GL03]	Triacylglycerols [GL0301]	LMGL03010089 --- LMGL03012907 --- LMGL03015497, LMGL03010089 --- LMGL03012907 --- LMGL03015148	TG(15:0/18:2(9Z,12Z)/18:2(9Z,12Z))[iso3] --- TG(15:1(9Z)/18:1(9Z)/18:2(9Z,12Z))[iso6] --- TG(16:1(9Z)/17:1(9Z)/18:2(9Z,12Z))[iso6], TG(15:0/18:1(9Z)/18:3(9Z,12Z,15Z))[iso6] --- TG(15:0/18:2(9Z,12Z)/18:2(9Z,12Z))[iso3] --- TG(16:1(9Z)/17:1(9Z)/18:2(9Z,12Z))[iso6]	TG 51:4	TG 15:0_18:2_18:2 --- TG 15:1_18:1_18:2 --- TG 16:1_17:1_18:2, TG 15:0_18:1_18:3 --- TG 15:0_18:2_18:2 --- TG 16:1_17:1_18:2	JHMHYYIDGDQQFH-DSZOASMONA-N, LJSWNLLJRASQSC-AUOINHTKNA-N, MIHLTJZHRJACQQ-YBQWMRSQNA-N, AKXOSLAHFAWDCG-IPYQHOITNA-N, LJSWNLLJRASQSC-AUOINHTKNA-N, MIHLTJZHRJACQQ-YBQWMRSQNA-N	C54H96O6	1	M+NH4, M+Na	858.7495, 863.7048		10.455	10.44	77.6882	10.277	100	100	0.156857	0.161105	0.356612	-0.00234772	0.987	0.998614	0.170591	0.548969	0.765052	-0.105006	0.366419	0.674204	0.0576768	0.361351	0.499067
ST 27:2;O	ST - Sterols	RP_PosMSMS_178	RT_2	Y	nonGL	Cholestenone M+H HMDB	Lipids and lipid-like molecules	Steroids and steroid derivatives	Cholestane steroids	HMDB0000921	Cholestenone	Sterols [ST]	Sterols [ST01]	Cholesterol and derivatives [ST0101]	LMST01010015	Cholestenone	ST 27:2;O		NYOXRYYXRWJDKP-GYKMGIIDSA-N	C27H44O	1	M+H	385.344		5.35	5.32	84.1398	17.2521	97.7099	100	0.155827	0.161287	0.356612	0.14761	0.301348	0.985013	0.170537	0.546626	0.765052	-0.0963209	0.404643	0.689906	0.0863076	0.168197	0.408222
FA 6:0;O	FA - Fatty Acids and Conjugates	HILIC_PosMSMS_176	RT_1	Y	nonGL	2-Ethyl-2-Hydroxybutyric acid M+H HMDB	Lipids and lipid-like molecules	Fatty Acyls	Fatty acids and conjugates	HMDB0001975	2-Ethyl-2-Hydroxybutyric acid	Fatty Acyls [FA]	Fatty Acids and Conjugates [FA01]	Hydroxy fatty acids [FA0105]	LMFA01050387	2-ethyl-2-hydroxy-butyric acid	FA 6:0;O		LXVSANCQXSSLPA-UHFFFAOYSA-N	C6H12O3	1	M+H	133.085		1.62	1.62	100	6.76691	100	100	-0.154343	0.162337	0.357815	-0.0773388	0.586225	0.993093	-0.266714	0.34171	0.765052	0.068101	0.55326	0.752426	-0.0770172	0.215978	0.443665
Indoleacetic acid	Indoles and derivatives	HILIC_PosMSMS_407			nonGL	3-Indoleacetic acid M+H NIST --- Indoleacetic acid M+H HMDB	Organoheterocyclic compounds	Indoles and derivatives	Indolyl carboxylic acids and derivatives	HMDB0000197	Indoleacetic acid								SEOVTRFCIGRIMH-UHFFFAOYSA-N	C10H9NO2	1	M+H	176.071		2.68	2.7	69.4595	11.3537	86.4662	100	0.154593	0.163013	0.358188	-0.100361	0.48116	0.985013	0.086395	0.759319	0.765052	0.134781	0.240935	0.627436	0.0338722	0.588689	0.609235
2-Pyrrolidinone	Organoheterocyclic compounds	HILIC_PosMSMS_33	RT_1		nonGL	2-Pyrrolidinone M+H HMDB	Organoheterocyclic compounds	Pyrrolidines	Pyrrolidones	HMDB0002039	2-Pyrrolidinone								HNJBEVLQSNELDL-UHFFFAOYSA-N	C4H7NO	2	M+H	86.0597	44.0126	1.58	1.58	100	14.5273	100	100	-0.15588	0.163788	0.358777	-0.263814	0.0648165	0.985013	-0.0416726	0.883711	0.769105	-0.154093	0.184021	0.589712	-0.1024	0.103553	0.369753
ST 21:3;O2	ST - Steroids	RP_PosMS1_24		Y	nonGL	.DELTA.9-Tetrahydrocannabinol M+H NIST --- 5(6)-EpETE methyl ester M+H-H2O NIST --- 5,16-Pregnadien-3.beta.-ol-20-one M+H NIST --- 5.alpha.-Pregnan-3.alpha.-ol-11,20-dione M+H-H2O NIST --- 9(11),(5.beta.)-Pregnen-3,20-dione M+H NIST --- 9(11),16,(5.alpha.)-Pregnadien-3.beta.-ol-20-one M+H NIST --- Progesterone M+H FiehnHILIC --- Progesterone M+H HMDB --- Progesterone; LC-APPI-QQ; MS2; CE M+H Mass…	Lipids and lipid-like molecules --- Organoheterocyclic compounds	Steroids and steroid derivatives --- Benzopyrans	Pregnane steroids --- 1-benzopyrans	HMDB0001830, HMDB0014613, HMDB0248256	Progesterone --- Tetrahydrocannabinol --- Alfaxalone	Polyketides [PR] --- Sterols [ST]	Aromatic polyketides [PK13] --- Steroids [ST02]	C21 steroids (gluco/mineralocorticoids, progestogins) and derivatives [ST0203] --- Other aromatic polyketides [PK1312]	LMPK13120004 --- LMST02030159	Tetrahydrocannabinol --- progesterone	ST 21:3;O2		BDSCYYACNUKQLZ-GJDCDIHCSA-N, BEMDNVDKNPNGEB-YUEQXVCFSA-N, CYQFCXCEBYINGO-IAGOWNOFSA-N, DUHUCHOQIDJXAT-UHFFFAOYSA-N, OAYVNTJIQBDDEZ-PGQHSIFQSA-N, RJKFOVLPORLFTN-LEKSSAKUSA-N, RJKFOVLPORLFTN-UHFFFAOYNA-N, YLFRRPUBVUAHSR-IQJXLZMJSA-N	C21H30O2, C21H32O3	1	M+H --- M+H-H2O	315.234		0.5	0.5	33.3333	23.7596	77.8626	100	0.155488	0.164413	0.359035	0.309	0.0298447	0.985013	0.517962	0.066472	0.765052	0.118738	0.306354	0.654154	0.134529	0.0314391	0.305104
Palmitamide	Other lipids	HILIC_PosMSMS_723		Y	nonGL	Palmitamide M+H NIST	Lipids and lipid-like molecules	Fatty Acyls	Fatty amides	HMDB0012273	Palmitic amide	Fatty Acyls [FA]	Fatty amides [FA08]	Primary amides [FA0801]	LMFA08010009	Palmitamide			HSEMFIZWXHQJAE-UHFFFAOYSA-N	C16H33NO	1	M+H	256.263		1.12	1.12	74.3243	10.6618	99.2481	100	-0.153118	0.164938	0.359073	0.150045	0.289059	0.985013	-0.331807	0.235409	0.765052	0.00917284	0.936287	0.833368	-0.0359319	0.564218	0.601245
Cys-Gly	Amino acids, peptides, and analogues	HILIC_PosMS1_415			nonGL	Cys-Gly M+H NIST --- Cysteinylglycine M+H HMDB --- Cysteinylglycine; LC-ESI-QTOF; MS2; CE M+H MassBank	Organic acids and derivatives	Carboxylic acids and derivatives	Amino acids, peptides, and analogues	HMDB0000078, HMDB0257594	Cysteinylglycine --- 2-[[(2S)-2-Amino-3-sulfanylpropanoyl]amino]acetic acid								ZUKPVRWZDMRIEO-UHFFFAOYSA-N, ZUKPVRWZDMRIEO-VKHMYHEASA-N	C5H10N2O3S	1	M+H	179.045		9.79	9.8	18.1081	20.7176	40.6015	100	-0.146713	0.166912	0.361759	-0.223712	0.0992126	0.985013	-0.265038	0.325361	0.765052	0.213834	0.0506487	0.442848	-0.102784	0.0845624	0.363249
L-Pipecolic acid	Amino acids, peptides, and analogues	HILIC_PosMSMS_158	RT_3		nonGL	L-Lysine M+H-NH3 NIST --- L-Pipecolic acid M+H NIST --- Pipecolic acid M+H HMDB	Organic acids and derivatives	Carboxylic acids and derivatives	Amino acids, peptides, and analogues	HMDB0000716, HMDB0005960, HMDB0000070	Pipecolic acid --- L-Pipecolic acid --- D-Pipecolic acid								HXEACLLIILLPRG-UHFFFAOYSA-N, HXEACLLIILLPRG-YFKPBYRVSA-N, KDXKERNSBIXSRK-UHFFFAOYSA-N	C6H11NO2	1	M+H --- M+H-NH3	130.086		10.24	10.24	45.4054	20.0559	94.7368	100	-0.157783	0.167307	0.361759	-0.0624112	0.671146	0.993093	-0.200116	0.490821	0.765052	0.0934954	0.430973	0.695343	-0.0719348	0.264183	0.447903
CAR 2:0	CAR	HILIC_PosMSMS_512		Y	nonGL	Acetyl-DL-carnitine M+H NIST --- Acetyl-L-carnitine M+H NIST	Lipids and lipid-like molecules	Fatty Acyls	Fatty acid esters	HMDB0240773	DL-Acetylcarnitine	Fatty Acyls [FA]	Fatty esters [FA07]	Fatty acyl carnitines [FA0707]	LMFA07070050 --- LMFA07070060	Acetyl-L-carnitine --- DL-Acetylcarnitine	CAR 2:0		RDHQFKQIGNGIED-MRVPVSSYSA-N, RDHQFKQIGNGIED-UHFFFAOYSA-N	C9H17NO4	1	M+H	204.123		5.5	5.49	53.7838	13.9817	74.4361	100	-0.153324	0.168136	0.361759	-0.103028	0.471223	0.985013	-0.39579	0.160047	0.765052	0.0103149	0.929002	0.833368	-0.0880308	0.159725	0.40357
TAG 52:6	TAG	RP_PosMSMS_1247, 1262		Y	GL	TG 16:1_18:2_18:3 M+NH4 Atlas, TG 16:0_18:3_18:3 M+Na Atlas --- TG 16:1_18:2_18:3 M+Na Atlas	Lipids and lipid-like molecules	Glycerolipids	Triradylcglycerols	HMDB0048758, HMDB0044494, HMDB0048758	TG(16:0/18:3(9Z,12Z,15Z)/18:3(9Z,12Z,15Z)) --- TG(16:1(9Z)/18:2(9Z,12Z)/18:3(9Z,12Z,15Z))	Glycerolipids [GL]	Triradylglycerols [GL03]	Triacylglycerols [GL0301]	LMGL03010193, LMGL03010192 --- LMGL03010193	TG(16:1(9Z)/18:2(9Z,12Z)/18:3(9Z,12Z,15Z))[iso6], TG(16:0/18:3(9Z,12Z,15Z)/18:3(9Z,12Z,15Z))[iso3] --- TG(16:1(9Z)/18:2(9Z,12Z)/18:3(9Z,12Z,15Z))[iso6]	TG 52:6	TG 16:1_18:2_18:3, TG 16:0_18:3_18:3 --- TG 16:1_18:2_18:3	NOOJQDXMGLPOOA-SHCTYRPRNA-N, GLKWVCJIQVMKME-HTINPRBKNA-N, NOOJQDXMGLPOOA-SHCTYRPRNA-N	C55H94O6	1	M+NH4, M+Na	868.7321, 873.6891		10.095	10.065	70.1613	6.3968	98.4733	100	0.154196	0.168217	0.361759	0.0205534	0.886515	0.997945	0.116677	0.681892	0.765052	-0.108734	0.34937	0.669896	0.058593	0.353533	0.495091
MAG 18:0	MAG	HILIC_PosMSMS_1252		Y	GL	Glycerol 1-stearate M+H NIST						Glycerolipids [GL]	Monoradylglycerols [GL01]	Monoacylglycerols [GL0101]	LMGL01010003	MG(18:0/0:0/0:0)[rac]	MG 18:0	MG 18:0	VBICKXHEKHSIBG-UHFFFAOYSA-N	C21H42O4	2	M+H	359.315	97.0998	1.24	1.25	100	9.38252	100	100	-0.148606	0.170296	0.36512	-0.223239	0.107177	0.985013	-0.298625	0.277469	0.765052	0.129003	0.251081	0.634176	-0.104952	0.084506	0.363249
Phe-Phe	Amino acids, peptides, and analogues	HILIC_PosMSMS_1040			nonGL	Phe-Phe M+H NIST	Organic acids and derivatives	Carboxylic acids and derivatives	Amino acids, peptides, and analogues	HMDB0013302	Phenylalanylphenylalanine								GKZIWHRNKRBEOH-UHFFFAOYSA-N	C18H20N2O3	1	M+H	313.154		9	9	76.4865	26.8658	48.8722	100	0.156432	0.171777	0.365584	0.152072	0.30067	0.985013	-0.120518	0.678953	0.765052	-0.102262	0.389738	0.68164	0.0729845	0.258086	0.446737
1-Methylhistamine --- 3-Methylhistamine	Amines	HILIC_PosMSMS_141			nonGL	1-Methylhistamine; LC-ESI-QTOF; MS2; CE M+H MassBank --- 3-Methylhistamine M+H HMDB	Organic nitrogen compounds	Organonitrogen compounds	Amines	HMDB0000898, HMDB0001861	1-Methylhistamine --- 3-Methylhistamine								CPAGZVLINCPJEH-UHFFFAOYSA-N, FHQDWPCFSJMNCT-UHFFFAOYSA-N	C6H11N3	1	M+H	126.102		16.15	16.14	27.8378	19.8686	45.1128	97.3684	0.151747	0.172212	0.365584	0.0095895	0.946555	0.998614	-0.00524961	0.985193	0.783342	0.192947	0.0929581	0.508125	0.0496774	0.428685	0.537892
2(3H)-Benzothiazolethione	Xenobiotics	HILIC_Neg, HILIC_PosMSMS_184, 358			nonGL	2(3H)-Benzothiazolethione M-H HMDB, 2(3H)-Benzothiazolethione M+H HMDB --- 2-Mercaptobenzothiazole M+H NIST	Organoheterocyclic compounds	Benzothiazoles		HMDB0030524	2(3H)-Benzothiazolethione								YXIWHUQXZSMYRE-UHFFFAOYSA-N	C7H5NS2	1, 2	M-H, M+H	165.9789, 167.9939	92.047	1.68	1.69	92.4119	24.9202	100	100	-0.155746	0.172401	0.365584	-0.285502	0.0497044	0.985013	-0.290807	0.315487	0.765052	-0.217315	0.0649682	0.451597	-0.118852	0.063284	0.336408
TAG O-62:10	TAG-O	RP_PosMS1_1525		Y	GL	TG O-18:0_22:4_22:6 M+Na Atlas --- TG O-18:0_22:5_22:5 M+Na Atlas --- TG O-18:1_22:3_22:6 M+Na Atlas --- TG O-18:1_22:4_22:5 M+Na Atlas --- TG O-18:2_22:2_22:6 M+Na Atlas --- TG O-18:2_22:3_22:5 M+Na Atlas --- TG O-18:2_22:4_22:4 M+Na Atlas --- TG O-18:3_22:1_22:6 M+Na Atlas --- TG O-18:3_22:2_22:5 M+Na Atlas --- TG O-18:3_22:3_22:4 M+Na Atlas --- TG O-18:4_22:0_22:6 M+Na Atlas --- TG O-18:4_22:1…	Lipids and lipid-like molecules	Glycerolipids	Triradylcglycerols	HMDB0055887	TG(22:5(7Z,10Z,13Z,16Z,19Z)/22:5(7Z,10Z,13Z,16Z,19Z)/O-18:0)								AEBCIFPRIRRIEA-DVRYVPLUNA-N, ASVWGUAALZUNNC-KEXZJUSQNA-N, ATAFLIORZJUJOU-AAKOKOEGNA-N, AWHASZMULTXMMM-UUEYOQNTNA-N, BAYMJRBFHQOZQX-GWQKBBMNNA-N, BOFJMEJXKQOPFP-QFKUBTEYNA-N, BPWGZJDUCARFHX-DHFWKUJONA-N, BRWJIXBKGIRXRA-JMPDUURONA-N, BTHYHMLCMURXCY-RMQNSOGXNA-N, CPNQLBWLVFBMTE-GFJFWDENNA-N, DGHMIARCEJZQNF-FVYBGTAKNA-N, DNZPCSWNXPLUQE-TVKIPDGXNA-N, DQTGULXWFSWZJZ-QMORMRQSNA-N, DTHLYDNYCWCUEV-MTBYHWL…	C65H108O5	1	M+Na	991.803		11.74	11.69	31.1828	28.297	83.9695	100	0.155262	0.172579	0.365584	0.135622	0.353517	0.985013	0.287558	0.319636	0.765052	0.0139043	0.906547	0.832797	0.0895934	0.16195	0.40357
FA 6:0;O2	FA - Fatty Acids and Conjugates	HILIC_PosMS1_375	RT_1	Y	nonGL	6-Propyl-2-thiouracil M+H NIST --- Mevalonic acid M+Na NIST --- Propylthiouracil M+H HMDB	Lipids and lipid-like molecules --- Organoheterocyclic compounds	Fatty Acyls --- Diazines	Fatty acids and conjugates --- Pyrimidines and pyrimidine derivatives	HMDB0000227, HMDB0014690	Mevalonic acid --- Propylthiouracil	Fatty Acyls [FA]	Fatty Acids and Conjugates [FA01]	Hydroxy fatty acids [FA0105]	LMFA01050352	Mevalonic acid	FA 6:0;O2		KJTLQQUUPVSXIM-ZCFIWIBFSA-N, KNAHARQHSZJURB-UHFFFAOYSA-N	C6H12O4, C7H10N2OS	1	M+H --- M+Na	171.063		10.84	10.84	59.7297	13.9069	61.6541	100	0.149935	0.173855	0.366602	0.0886977	0.531475	0.985013	0.260654	0.351798	0.765052	0.00995278	0.930862	0.833368	0.0775146	0.212011	0.439107
Acrylamide	Carboximidic acids and derivatives	HILIC_PosMS1_15			nonGL	Acrylamide M+H HMDB	Organic acids and derivatives	Carboximidic acids and derivatives	Carboximidic acids	HMDB0004296	Acrylamide								HRPVXLWXLXDGHG-UHFFFAOYSA-N	C3H5NO	1	M+H	72.0441		1.7	1.71	71.0811	15.768	100	100	0.152773	0.174096	0.366602	-0.00808178	0.955444	0.998614	0.552233	0.0512672	0.765052	-0.0249771	0.830869	0.818513	0.0741262	0.241951	0.443666
FA 25:0	FA - Fatty Acids and Conjugates	HILIC_NegMS1_818		Y	nonGL	FA 25:0 M-H Atlas	Lipids and lipid-like molecules	Fatty Acyls	Fatty acids and conjugates	HMDB0002361	Pentacosanoic acid	Fatty Acyls [FA]	Fatty Acids and Conjugates [FA01]	Straight chain fatty acids [FA0101]	LMFA01010025	Hyenic acid	FA 25:0		MWMPEAHGUXCSMY-UHFFFAOYSA-N	C25H50O2	1	M-H	381.372		1.21	1.21	63.1436	24.5909	100	100	-0.151705	0.175091	0.367603	-0.333743	0.0187502	0.985013	-0.139906	0.622883	0.765052	-0.163563	0.157889	0.573244	-0.119434	0.0567762	0.336408
Cer 42:4;O2	Cer	RP_PosMSMS_578		Y	nonGL	Cer 18:1;2O/24:3 M+H Atlas													MRVHMHLOVRJTKO-XZEUHWMINA-N	C42H77NO3	1	M+H	644.591		8.29	8.25	86.5591	8.62269	99.2366	100	0.145916	0.177557	0.371677	-0.0252473	0.856122	0.993093	0.0888232	0.746955	0.765052	-0.116068	0.301319	0.653825	0.0457486	0.454096	0.552037
Galactinol --- Lactulose --- Sucrose --- beta-Lactose --- Cellobiose	Carbohydrates and carbohydrate conjugates	HILIC_NegMS1_718	RT_2		nonGL	2-alpha-Mannobiose M-H FiehnHILIC --- 6.alpha.-Mannobiose M-H NIST --- Cellobiose M-H FiehnHILIC --- Cellobiose M-H HMDB --- D-(+)-Trehalose; LC-ESI-QTOF; MS2; CE M-H MassBank --- Galactinol; LC-ESI-QTOF; MS2; CE M-H MassBank --- Isomaltose M-H FiehnHILIC --- Lactose M-H FiehnHILIC --- Lactulose M-H FiehnHILIC --- Lactulose M-H HMDB --- Maltose M-H FiehnHILIC --- Melibiose M-H FiehnHILIC --- Pala…	Organic oxygen compounds --- Organoheterocyclic compounds --- Lipids and lipid-like molecules	Organooxygen compounds --- Benzodiazepines --- Fatty Acyls	Carbohydrates and carbohydrate conjugates --- 1,4-benzodiazepines --- Fatty acyl glycosides	HMDB0000055, HMDB0000740, HMDB0015527, HMDB0248216, HMDB0259486	Cellobiose --- Lactulose --- Prazepam --- 6-O-alpha-D-Galactopyranosyl-D-galactopyranose --- D-Glucose, 6-O-alpha-D-glucopyranosyl-								AYRXSINWFIIFAE-UHFFFAOYSA-N, CZMRCDWAGMRECN-UGDNZRGBSA-N, CZMRCDWAGMRECN-UHFFFAOYNA-N, DLRVVLDZNNYCBX-UHFFFAOYNA-N, GUBGYTABKSRVRQ-DCSYEGIMSA-N, GUBGYTABKSRVRQ-QRZGKKJRSA-N, GUBGYTABKSRVRQ-UHFFFAOYNA-N, HDTRYLNUVZCQOY-LIZSDCNHSA-N, HDTRYLNUVZCQOY-UHFFFAOYNA-N, HIWPGCMGAMJNRG-UHFFFAOYNA-N, JCQLYHFGKNRPGE-FCVZTGTOSA-N, JCQLYHFGKNRPGE-UHFFFAOYNA-N, PVXPPJIGRGXGCY-TZLCEDOOSA-N, PVXPPJIGRGXGCY-UHFFFAO…	C12H22O11	1	M-H	341.107		12.52	12.52	35.5014	8.80478	98.4962	100	-0.148563	0.179293	0.372724	-0.175699	0.215324	0.985013	-0.374694	0.181153	0.765052	0.26191	0.0211026	0.350248	-0.0995143	0.109358	0.376677
TAG 42:1	TAG	RP_PosMSMS_825		Y	GL	TG 12:0_12:0_18:1 M+NH4 Atlas --- TG 12:0_14:1_16:0 M+NH4 Atlas --- TG 8:0_16:0_18:1 M+NH4 Atlas						Glycerolipids [GL]	Triradylglycerols [GL03]	Triacylglycerols [GL0301]	LMGL03012638 --- LMGL03013240	TG(12:0/12:0/18:1(9Z))[iso3] --- TG(12:0/14:1(9Z)/16:0)[iso6]	TG 42:1	TG 12:0_12:0_18:1 --- TG 12:0_14:1_16:0	GOKZYHOGUBGXBC-DQRAZIAONA-N, KOZSAZQHBRKVPG-VKAVYKQENA-N, VHSCSWKCDUHRCW-DQRAZIAONA-N	C45H84O6	1	M+NH4	738.656		9.58	9.54	61.828	22.016	74.8092	100	0.147279	0.179328	0.372724	-0.124314	0.377462	0.985013	-0.107567	0.699784	0.765052	0.140632	0.216015	0.614668	0.0173481	0.779651	0.654024
PIP(18:1(9Z)/18:1(9Z))	Other lipids	HILIC_NegMS1_1029		Y	nonGL	1,2-Dioleoyl-sn-glycero-3-phospho-(1'-myo-inositol-3'-phosphate) M-2H NIST	Lipids and lipid-like molecules	Glycerophospholipids	Glycerophosphoinositol phosphates	HMDB0009974	PIP(18:1(9Z)/18:1(9Z))								ISKUBHYPLQMTBH-HTTWJMIOSA-N	C45H84O16P2	1	M-2H	470.251		7.41	7.66	77.7778	17.1772	52.6316	99.1228	0.151986	0.179637	0.372724	-0.0402089	0.782591	0.993093	0.455637	0.11157	0.765052	0.230387	0.048345	0.442848	0.0629011	0.324868	0.482274
TAG 49:4	TAG	RP_PosMSMS_1138		Y	GL	TG 10:0_11:0_28:4 M+Na Atlas --- TG 10:0_13:0_26:4 M+Na Atlas --- TG 10:0_13:1_26:3 M+Na Atlas --- TG 10:0_15:0_24:4 M+Na Atlas --- TG 10:0_15:1_24:3 M+Na Atlas --- TG 10:0_16:4_23:0 M+Na Atlas --- TG 10:0_17:0_22:4 M+Na Atlas --- TG 10:0_17:1_22:3 M+Na Atlas --- TG 10:0_17:2_22:2 M+Na Atlas --- TG 10:0_18:2_21:2 M+Na Atlas --- TG 10:0_18:3_21:1 M+Na Atlas --- TG 10:0_18:4_21:0 M+Na Atlas --- TG …	Lipids and lipid-like molecules	Glycerolipids	Triradylcglycerols	HMDB0042116, HMDB0043041, HMDB0043214	TG(14:0/15:0/20:4(8Z,11Z,14Z,17Z)) --- TG(15:0/16:0/18:4(6Z,9Z,12Z,15Z)) --- TG(15:0/16:1(9Z)/18:3(9Z,12Z,15Z))	Glycerolipids [GL]	Triradylglycerols [GL03]	Triacylglycerols [GL0301]	LMGL03010035 --- LMGL03012733 --- LMGL03012904 --- LMGL03013318 --- LMGL03013429 --- LMGL03013521 --- LMGL03013536 --- LMGL03013727 --- LMGL03013910 --- LMGL03013929 --- LMGL03014279 --- LMGL03014301 --- LMGL03014321 --- LMGL03014615 --- LMGL03014684 --- LMGL03014705 --- LMGL03014726 --- LMGL03015014 --- LMGL03015038 --- LMGL03015364 --- LMGL03015387 --- LMGL03015431	TG(12:0/15:1(9Z)/22:3(10Z,13Z,16Z))[iso6] --- TG(12:0/17:2(9Z,12Z)/20:2(11Z,14Z))[iso6] --- TG(12:0/18:3(9Z,12Z,15Z)/19:1(9Z))[iso6] --- TG(12:0/18:4(6Z,9Z,12Z,15Z)/19:0)[iso6] --- TG(13:0/14:1(9Z)/22:3(10Z,13Z,16Z))[iso6] --- TG(13:0/18:0/18:4(6Z,9Z,12Z,15Z))[iso6] --- TG(13:0/18:1(9Z)/18:3(9Z,12Z,15Z))[iso6] --- TG(13:0/18:2(9Z,12Z)/18:2(9Z,12Z))[iso3] --- TG(14:0/17:0/18:4(6Z,9Z,12Z,15Z))[iso6…	TG 49:4	TG 12:0_15:1_22:3 --- TG 12:0_17:2_20:2 --- TG 12:0_18:3_19:1 --- TG 12:0_18:4_19:0 --- TG 13:0_14:1_22:3 --- TG 13:0_18:0_18:4 --- TG 13:0_18:1_18:3 --- TG 13:0_18:2_18:2 --- TG 14:0_17:0_18:4 --- TG 14:0_17:1_18:3 --- TG 14:0_17:2_18:2 --- TG 14:1_15:1_20:2 --- TG 14:1_17:0_18:3 --- TG 14:1_17:1_18:2 --- TG 14:1_17:2_18:1 --- TG 15:0_16:0_18:4 --- TG 15:0_16:1_18:3 --- TG 15:0_17:2_17:2 --- TG …	AESJJSXQLQHEBP-RFWOPXHNNA-N, ARDVTRAPTXYLFE-UPWYTWOYNA-N, AVTOCQWXHJVDFS-NBKYDHCHNA-N, AXMBZOOUHGEOLO-WIJCIVSENA-N, BCJXZZQLKXOBHX-KCEVUTCSNA-N, BGCDESMHBOGEAW-DKSIPLKENA-N, BJILSCTYCQWNLV-HPTPKDNANA-N, BKRHAMBZZKKNDU-PAJBAMARNA-N, BNNWTQCUDNZFTO-KRUWQHIMNA-N, BQELABAKLKGPKA-RGYBQKTINA-N, BSNIISAHPKGDDL-GMZRDVTMNA-N, BUJMZWBDNCUXKX-BXRBPIJNNA-N, BUMYDPNUJJWRSF-TXKUKGRYNA-N, BVDJODWQTFSOLM-DZJPTJE…	C52H92O6	1	M+Na	835.675		10.12	10.02	14.7849	11.7833	10.687	100	0.144989	0.180435	0.373286	0.113526	0.414254	0.985013	0.0859817	0.754834	0.765052	-0.0122435	0.913423	0.832797	0.0721145	0.237086	0.443666
Oleamide	Other lipids	HILIC_PosMSMS_779		Y	nonGL	9-Octadecenamide, (Z)- M+H-NH3 NIST	Lipids and lipid-like molecules	Fatty Acyls	Fatty amides	HMDB0002117	Oleamide	Fatty Acyls [FA]	Fatty amides [FA08]	Primary amides [FA0801]	LMFA08010004	Oleamide			FATBGEAMYMYZAF-KTKRTIGZSA-N	C18H35NO	1	M+H-NH3	265.252		1.39	1.39	99.7297	26.7509	100	100	0.153533	0.181007	0.373377	-0.0107941	0.941735	0.998614	0.0158689	0.956662	0.778593	0.0419541	0.725244	0.799097	0.0473499	0.465053	0.559375
LPC O-16:0	LPC-O	RP_PosMSMS_337		Y	nonGL	1-Hexadecyl-sn-glycero-3-phosphocholine M+H NIST --- LPC O-16:0 M+H Atlas	Lipids and lipid-like molecules	Glycerophospholipids	Glycerophosphocholines	HMDB0243890	1-O-Hexadecyl-sn-glycero-3-phosphocholine								VLBPIWYTPAXCFJ-UHFFFAOYNA-N, VLBPIWYTPAXCFJ-UHFFFAOYSA-N	C24H52NO6P	1	M+H	482.36		3.09	3.07	17.7419	14.8979	23.6641	100	-0.137131	0.182301	0.373441	-0.107703	0.414801	0.985013	-0.192859	0.460351	0.765052	-0.0894229	0.402325	0.68941	-0.073779	0.202585	0.431003
L-Fucose	Carbohydrates and carbohydrate conjugates	HILIC_NegMS1_661	RT_1		nonGL	L-(-)-Fucose 2M-H NIST	Organic oxygen compounds	Organooxygen compounds	Carbohydrates and carbohydrate conjugates	HMDB0247051	D-Quinovose								SHZGCJCMOBCMKK-UHFFFAOYSA-N	C6H12O5	1	2M-H	327.128		8.98	8.98	34.1463	29.6713	94.7368	100	-0.136895	0.183435	0.373441	-0.0791679	0.549539	0.9863	-0.318464	0.222103	0.765052	-0.2251	0.0334533	0.414557	-0.0743976	0.199177	0.430857
TAG 53:9	TAG	RP_PosMS1_1270		Y	GL	TG 10:0_11:0_32:9 M+NH4 Atlas --- TG 10:0_13:1_30:8 M+NH4 Atlas --- TG 10:0_17:2_26:7 M+NH4 Atlas --- TG 11:0_16:2_26:7 M+NH4 Atlas --- TG 11:0_16:3_26:6 M+NH4 Atlas --- TG 11:0_16:4_26:5 M+NH4 Atlas --- TG 11:0_18:3_24:6 M+NH4 Atlas --- TG 11:0_18:4_24:5 M+NH4 Atlas --- TG 11:0_18:5_24:4 M+NH4 Atlas --- TG 11:0_20:3_22:6 M+NH4 Atlas --- TG 11:0_20:4_22:5 M+NH4 Atlas --- TG 11:0_20:5_22:4 M+NH4 A…	Lipids and lipid-like molecules	Glycerolipids	Triradylcglycerols	HMDB0043681	TG(15:0/18:4(6Z,9Z,12Z,15Z)/20:5(5Z,8Z,11Z,14Z,17Z))	Glycerolipids [GL]	Triradylglycerols [GL03]	Triacylglycerols [GL0301]	LMGL03013010 --- LMGL03014000 --- LMGL03014015 --- LMGL03014746 --- LMGL03015227 --- LMGL03015562 --- LMGL03016093	TG(13:0/18:3(9Z,12Z,15Z)/22:6(4Z,7Z,10Z,13Z,16Z,19Z))[iso6] --- TG(13:0/18:4(6Z,9Z,12Z,15Z)/22:5(7Z,10Z,13Z,16Z,19Z))[iso6] --- TG(14:1(9Z)/17:2(9Z,12Z)/22:6(4Z,7Z,10Z,13Z,16Z,19Z))[iso6] --- TG(15:0/18:4(6Z,9Z,12Z,15Z)/20:5(5Z,8Z,11Z,14Z,17Z))[iso6] --- TG(15:1(9Z)/18:3(9Z,12Z,15Z)/20:5(5Z,8Z,11Z,14Z,17Z))[iso6] --- TG(17:1(9Z)/18:4(6Z,9Z,12Z,15Z)/18:4(6Z,9Z,12Z,15Z))[iso3] --- TG(17:2(9Z,12Z)/1…	TG 53:9	TG 13:0_18:3_22:6 --- TG 13:0_18:4_22:5 --- TG 14:1_17:2_22:6 --- TG 15:0_18:4_20:5 --- TG 15:1_18:3_20:5 --- TG 17:1_18:4_18:4 --- TG 17:2_18:3_18:4	AGMOSFLDTWOZKG-JAUUBXJONA-N, ANJMBAFAEGSLOB-KUCOBKKINA-N, AZSCFEZUSBGWJA-JNTVCBAINA-N, BHPRDHPGJGUKNN-XYWIMTPHNA-N, BXGFFDXBRBDCBP-YEZXMMANNA-N, CBADSBHOQYLYDB-DWVYNEJFNA-N, CDPUGBIDPHJKCC-QVMZBENRNA-N, CDXYHNDBWIZRMQ-AGVFXMICNA-N, CNLUDDYSSFBGTQ-NIKIUKNRNA-N, CXPUADHKGMCRHP-FNCJLJBQNA-N, DAAGXYXVECIIMA-ZELULIAWNA-N, DBFZUDORAPUHGF-QYVATBQJNA-N, DJQQTJPAWBZBSZ-VYUPEIDGNA-N, DSRKPEHAZZBLLY-MOCBDAJ…	C56H90O6	1	M+NH4	876.708		10.34	10.31	95.6989	8.87823	100	100	0.152762	0.183477	0.373441	-0.0247185	0.867141	0.993093	0.0381553	0.896098	0.769105	-0.156661	0.187852	0.589863	0.0455172	0.482799	0.572409
FA 18:2;O	FA - Octadecanoids	HILIC_NegMSMS_563		Y	nonGL	12(13)-Epoxy-9Z-octadecenoic acid M-H NIST --- 12,13-DiHOME M-H-H2O NIST --- 12,13-EODE; LC-ESI-QIT; MS2; CE M-H MassBank --- 13-HODE M-H NIST --- 9(10)-EpOME M-H NIST	Lipids and lipid-like molecules	Fatty Acyls	Fatty acids and conjugates	HMDB0004702	12,13-EpOME	Fatty Acyls [FA]	Octadecanoids [FA02]	Other Octadecanoids [FA0200]	LMFA02000038 --- LMFA02000154	12(13)-EpOME --- Coriolic acid	FA 18:2;O		CCPPLLJZDQAOHD-DHZHZOJONA-N, CCPPLLJZDQAOHD-FLIBITNWSA-N, CQSLTKIXAJTQGA-GJGKEFFFSA-N, FBUKMFOXMZRGRB-XKJZPFPASA-N, HNICUWMFWZBIFP-BSZOFBHHSA-N	C18H32O3	1	M-H --- M-H-H2O	295.227		1.53	1.53	95.935	17.2359	100	100	-0.150539	0.184083	0.373441	-0.148551	0.307058	0.985013	-0.412568	0.150335	0.765052	0.0935103	0.426962	0.695343	-0.0967687	0.128792	0.388039
PE 38:4	PE	RP_Pos, RP_NegMSMS_912, 453		Y	nonGL	1-Octadecanoyl-2-(5Z,8Z,11Z,14Z-eicosatetraenoyl)-sn-glycero-3-phosphoethanolamine M+H NIST --- 1-Stearoyl-2-oleoyl-sn-glycero-3-phosphoethanolamine M+Na NIST, 1-Octadecanoyl-2-(5Z,8Z,11Z,14Z-eicosatetraenoyl)-sn-glycero-3-phosphoethanolamine M-H NIST --- PE 18:0_20:4 M-H Atlas	Lipids and lipid-like molecules	Glycerophospholipids	Glycerophosphoethanolamines	HMDB0008993, HMDB0009003	PE(18:0/18:1(9Z)) --- PE(18:0/20:4(5Z,8Z,11Z,14Z))	Glycerophospholipids [GP]	Glycerophosphoethanolamines [GP02]	Diacylglycerophosphoethanolamines [GP0201]	LMGP02010036 --- LMGP02010118, LMGP02010118	PE(18:0/18:1(9Z)) --- PE(18:0/20:4(5Z,8Z,11Z,14Z)), PE(18:0/20:4(5Z,8Z,11Z,14Z))	PE 36:1 --- PE 38:4, PE 38:4	PE 18:0_18:1 --- PE 18:0_20:4, PE 18:0_20:4	ANRKEHNWXKCXDB-BHFWLYLHSA-N, JQKOHRZNEOQNJE-DJEJVYNPSA-N, ANRKEHNWXKCXDB-BHFWLYLHSA-N, YEHAZLUVAZKVRO-ZKVKLVECNA-N	C41H80NO8P, C43H78NO8P, C43H78NO8P	2	M+H --- M+Na, M-H	768.55, 766.5396	627.5403, 303.2306	6.5	6.45	92.2043	21.7455	98.4733	100	0.147676	0.184372	0.373441	-0.0552428	0.699432	0.993093	0.0468568	0.868498	0.769105	0.0375838	0.745305	0.80495	0.0384406	0.540744	0.592464
TAG 53:10	TAG	RP_PosMS1_1265		Y	GL	DGGA 13:0_27:0 M+NH4 Atlas --- DGGA 14:0_26:0 M+NH4 Atlas --- DGGA 15:0_25:0 M+NH4 Atlas --- DGGA 16:0_24:0 M+NH4 Atlas --- DGGA 17:0_23:0 M+NH4 Atlas --- DGGA 18:0_22:0 M+NH4 Atlas --- DGGA 19:0_21:0 M+NH4 Atlas --- DGGA 20:0_20:0 M+NH4 Atlas --- TG 11:0_16:3_26:7 M+NH4 Atlas --- TG 11:0_16:4_26:6 M+NH4 Atlas --- TG 11:0_18:4_24:6 M+NH4 Atlas --- TG 11:0_18:5_24:5 M+NH4 Atlas --- TG 11:0_20:4_22…						Glycerolipids [GL]	Triradylglycerols [GL03]	Triacylglycerols [GL0301]	LMGL03012744 --- LMGL03013018 --- LMGL03014016 --- LMGL03015578	TG(13:0/18:4(6Z,9Z,12Z,15Z)/22:6(4Z,7Z,10Z,13Z,16Z,19Z))[iso6] --- TG(13:0/20:5(5Z,8Z,11Z,14Z,17Z)/20:5(5Z,8Z,11Z,14Z,17Z))[iso3] --- TG(15:1(9Z)/18:4(6Z,9Z,12Z,15Z)/20:5(5Z,8Z,11Z,14Z,17Z))[iso6] --- TG(17:2(9Z,12Z)/18:4(6Z,9Z,12Z,15Z)/18:4(6Z,9Z,12Z,15Z))[iso3]	TG 53:10	TG 13:0_18:4_22:6 --- TG 13:0_20:5_20:5 --- TG 15:1_18:4_20:5 --- TG 17:2_18:4_18:4	AKIFDHDKMAYVIC-UHFFFAOYNA-N, AWGWXJJVNRZGAP-VZZOOVHRNA-N, BRYBHUDLFVCRMY-DVPXPKKENA-N, BTRDUZROPJXQCJ-UHFFFAOYNA-N, BYIHTWZCMQKBRF-AWZDZJDPNA-N, CCGKNNNSYRHCOD-QGVQNHSRNA-N, CZLLCVJCCWYWEN-OMKQUPNGNA-N, DVMNBZWKBQCUQH-VQEBDTOVNA-N, DVNNGKKEYHKHMY-HGLRFDLQNA-N, FTJVXZJRNMEFLY-UHFFFAOYNA-N, FUWZOUCSVODWML-NVRPFKRQNA-N, HETOCBBOOIWSGD-MAAVHZEXNA-N, HLAOEXLGAXUUOH-AFLVBVLJNA-N, HOQWEPIRKTVDBT-BDGQVXQ…	C56H88O6	1	M+NH4	874.693		10.08	10.08	70.9677	7.58118	100	100	0.148396	0.184458	0.373441	0.0123156	0.931778	0.998614	0.0975993	0.731447	0.765052	-0.120109	0.300496	0.653825	0.054222	0.390206	0.510697
PC 38:6	PC	RP_Pos, RP_NegMSMS_1040, 1111, 667		Y	nonGL	1-Palmitoyl-2-docosahexaenoyl-sn-glycero-3-phosphocholine M+H NIST --- PC 36:3 M+Na Atlas, PC 38:6 M+Na Atlas, PC 16:0_22:6 M+HCOO Atlas --- PC 18:2_20:4 M+HCOO Atlas	Lipids and lipid-like molecules	Glycerophospholipids	Glycerophosphocholines	HMDB0007991, HMDB0007991, HMDB0008148	PC(16:0/22:6(4Z,7Z,10Z,13Z,16Z,19Z)) --- PC(18:2(9Z,12Z)/20:4(8Z,11Z,14Z,17Z))	Glycerophospholipids [GP]	Glycerophosphocholines [GP01]	Diacylglycerophosphocholines [GP0101]	LMGP01012137, LMGP01010650 --- LMGP01012137 --- LMGP01012171	PC(16:0/22:6(4Z,7Z,10Z,13Z,16Z,19Z)), PC(16:0/22:6(4E,7E,10E,13E,16E,19E)) --- PC(16:0/22:6(4Z,7Z,10Z,13Z,16Z,19Z)) --- PC(18:2(9Z,12Z)/20:4(8Z,11Z,14Z,17Z))	PC 38:6	PC 16:0_22:6, PC 16:0_22:6 --- PC 18:2_20:4	GDWULUGDXGHJIJ-RWLIYIGXNA-N, IESVDEZGAHUQJU-ZLBXKVHBSA-N, KFEJJJVOBLNOCQ-WZUSAPNINA-N, JIEQRHOWVOAZRM-RHJXZECXNA-N, MSQRKPKYVJEFQD-QUAAIENRNA-N, IESVDEZGAHUQJU-SYGPSSPWNA-N, RUHBZJXWUDKAMZ-ODAJXHQSNA-N	C46H80NO8P	2	M+H --- M+Na, M+Na, M+HCOO	806.564, 828.5475, 850.5607	184.0718, 645.4809, 168.0415	5.71	5.71	99.7312	15.5908	100	100	0.145793	0.184733	0.373441	0.00366767	0.979311	0.998614	0.188353	0.500117	0.765052	-0.162785	0.152455	0.563579	0.0562099	0.364791	0.499067
LPC 18:2	LPC	RP_Pos, RP_NegMSMS_391, 424, 179		Y	nonGL	LPC 18:2-SN1 M+H Atlas --- PC O-18:2 M+H Atlas, LPC 18:2 M+Na Atlas, LPC 18:2 M+HCOO Atlas	Lipids and lipid-like molecules	Glycerophospholipids	Glycerophosphocholines	HMDB0010386	LysoPC(18:2(9Z,12Z)/0:0)	Glycerophospholipids [GP]	Glycerophosphocholines [GP01]	Monoacylglycerophosphocholines [GP0105]	LMGP01050035	PC(18:2(9Z,12Z)/0:0)	LPC 18:2	LPC 18:2	JVDZMIANQJZKTI-MURFETPANA-N, SPJFYYJXNPEZDW-UTJQPWESNA-N, SPJFYYJXNPEZDW-UTJQPWESNA-N	C26H50NO7P	2, 1	M+H, M+Na, M+HCOO	520.3378, 542.3198, 564.3308	184.0731, 224.0643	2.6	2.59	68.5484	12.5913	100	100	-0.137508	0.186601	0.375832	-0.00766988	0.954339	0.998614	-0.121626	0.645919	0.765052	-0.153036	0.155556	0.567306	-0.0510614	0.384815	0.506647
TAG O-58:4	TAG-O	RP_PosMS1_1439		Y	GL	TG O-14:0_22:0_22:4 M+Na Atlas --- TG O-14:0_22:1_22:3 M+Na Atlas --- TG O-14:0_22:2_22:2 M+Na Atlas --- TG O-14:1_22:0_22:3 M+Na Atlas --- TG O-14:1_22:1_22:2 M+Na Atlas --- TG O-16:0_20:0_22:4 M+Na Atlas --- TG O-16:0_20:1_22:3 M+Na Atlas --- TG O-16:0_20:2_22:2 M+Na Atlas --- TG O-16:0_20:3_22:1 M+Na Atlas --- TG O-16:0_20:4_22:0 M+Na Atlas --- TG O-16:1_20:0_22:3 M+Na Atlas --- TG O-16:1_20:1…	Lipids and lipid-like molecules	Glycerolipids	Triradylcglycerols	HMDB0046880, HMDB0051815, HMDB0053497, HMDB0054500, HMDB0055560	TG(22:0/18:4(6Z,9Z,12Z,15Z)/O-18:0) --- TG(22:1(13Z)/18:3(9Z,12Z,15Z)/O-18:0) --- TG(20:2n6/20:2n6/O-18:0) --- TG(22:2(13Z,16Z)/18:2(9Z,12Z)/O-18:0) --- TG(20:4(8Z,11Z,14Z,17Z)/20:0/O-18:0)								AHWAAIWRGKZIQL-BHZZOFANNA-N, AKQZTODFGYWKJU-SHAHUVMBNA-N, AREVHDOEQVXXJH-AYQSLVJKNA-N, ATECGOHEGHYRDO-ZBTSZJFVNA-N, AXCNNPIKJGVNST-YBQWMRSQNA-N, BBPUKOYMVVELSS-NCBYOJCUNA-N, BGOMLLYGSVXTHS-RKQAISDRNA-N, BLHKJLAZSOXYQQ-BDEXLAGBNA-N, BTWZGYSVNJRJHZ-KNNOKYKTNA-N, BZVGAEOGMWOCER-KTYNSHOANA-N, BZVYNHAMNGVMLB-OQXJPCJRNA-N, CANUMAUENOKSHR-JCHXJBCLNA-N, CDIAEAQVXSBFAR-YBQWMRSQNA-N, CGRJBUQHZIXANE-XRKNARF…	C61H112O5	1	M+Na	947.838		11.96	11.95	34.9462	21.7417	89.313	100	0.150801	0.186978	0.375832	0.0794622	0.588607	0.993093	-0.0885818	0.760541	0.765052	-0.050322	0.671927	0.785957	0.0587551	0.362162	0.499067
PG 33:0	PG	RP_NegMSMS_379		Y	nonGL	PG 16:0_17:0 M-H Atlas						Glycerophospholipids [GP]	Glycerophosphoglycerols [GP04]	Diacylglycerophosphoglycerols [GP0401]	LMGP04010909	PG(16:0/17:0)	PG 33:0	PG 16:0_17:0	MXWSMQMRZPPNRI-UHFFFAOYNA-N	C39H77O10P	2	M-H	735.521	256.233	3.5	3.49	15.903	19.5763	33.5878	100	-0.147464	0.187648	0.37611	-0.0926762	0.519382	0.985013	-0.111497	0.695235	0.765052	0.192421	0.0960475	0.513382	-0.0701324	0.266233	0.447903
PC 40:8	PC	RP_Pos, RP_NegMSMS_1120, 1185, 709		Y	nonGL	1,2-Diarachidonoyl-sn-glycero-3-phosphocholine M+H NIST, PC 40:8 M+Na Atlas, PC 18:2_22:6 M+HCOO Atlas --- PC 20:4_20:4 M+HCOO Atlas	Lipids and lipid-like molecules	Glycerophospholipids	Glycerophosphocholines	HMDB0008443, HMDB0008477, HMDB0008156	PC(18:2(9Z,12Z)/22:6(4Z,7Z,10Z,13Z,16Z,19Z)) --- PC(20:4(5Z,8Z,11Z,14Z)/20:4(5Z,8Z,11Z,14Z)) --- PC(20:4(8Z,11Z,14Z,17Z)/20:4(8Z,11Z,14Z,17Z))	Glycerophospholipids [GP]	Glycerophosphocholines [GP01]	Diacylglycerophosphocholines [GP0101]	LMGP01011052, LMGP01010947	PC(20:4(5Z,8Z,11Z,14Z)/20:4(5Z,8Z,11Z,14Z)), PC(18:2(9Z,12Z)/22:6(4Z,7Z,10Z,13Z,16Z,19Z))	PC 40:8	PC 20:4/20:4, PC 18:2_22:6	LZLVZIFMYXDKCN-QJWFYWCHSA-N, BFCSBEFTXQRIOJ-QIURYZFVNA-N, YFPZDRPTUVXQJW-CLUYAFRTNA-N, BFCSBEFTXQRIOJ-QIURYZFVNA-N, FCTKCFNDGVBOBD-ZPBIJWSINA-N	C48H80NO8P	1, 2	M+H, M+Na, M+HCOO	830.5642, 852.5478, 874.5596	669.4783, 814.544	5.36	5.32	66.129	26.8607	95.4198	100	0.144191	0.18842	0.376591	0.044189	0.753987	0.993093	0.32718	0.23908	0.765052	-0.233309	0.038641	0.419009	0.070385	0.254574	0.445606
PI 40:5	PI	RP_NegMSMS_742		Y	nonGL	PI 18:0_22:5 M-H Atlas	Lipids and lipid-like molecules	Glycerophospholipids	Glycerophosphoinositols	HMDB0009820	PI(18:0/22:5(7Z,10Z,13Z,16Z,19Z))								QLABQLNIHHHJCI-NIZIMQIGNA-N	C49H85O13P	1	M-H	911.565		5.45	5.45	59.5687	11.2739	95.4198	99.1228	0.146726	0.191289	0.379433	0.0713338	0.621196	0.993093	0.0513604	0.857277	0.769105	0.034462	0.767881	0.805802	0.0628066	0.321247	0.478407
PC 39:6	PC	RP_PosMSMS_1087, 1160		Y	nonGL	PC 17:0_22:6 M+H Atlas --- PC 19:2_20:4 M+H Atlas, PC 39:6 M+Na Atlas	Lipids and lipid-like molecules	Glycerophospholipids	Glycerophosphocholines	HMDB0240629	PC(17:0/22:6(4Z,7Z,10Z,13Z,16Z,19Z))	Glycerophospholipids [GP]	Glycerophosphocholines [GP01]	Diacylglycerophosphocholines [GP0101]	LMGP01010720	PC(17:0/22:6(4Z,7Z,10Z,13Z,16Z,19Z))	PC 39:6	PC 17:0_22:6	KSRURLYJRNYEOH-CRVSLQDRNA-N, VOGPNOFJLLXVKY-FJVCFRLJNA-N, VOGPNOFJLLXVKY-FJVCFRLJNA-N, XDEWGGXVYRMEIR-MSXCAIDTNA-N	C47H82NO8P	1, 2	M+H, M+Na	820.5797, 842.5634	659.501	6.01	6.015	69.086	17.8534	97.7099	100	0.142722	0.191298	0.379433	0.165923	0.235986	0.985013	0.349541	0.206515	0.765052	-0.125281	0.26864	0.640907	0.0945332	0.123521	0.388039
Phe-Pro	Amino acids, peptides, and analogues	HILIC_PosMSMS_767	RT_1		nonGL	Phe-Pro M+H NIST	Organic acids and derivatives	Carboxylic acids and derivatives	Amino acids, peptides, and analogues	HMDB0011177	Phenylalanylproline								WEQJQNWXCSUVMA-UHFFFAOYSA-N	C14H18N2O3	1	M+H	263.139		10.05	10.04	57.8378	17.801	70.6767	100	0.141228	0.191932	0.379433	-0.165059	0.234155	0.985013	-0.162157	0.555508	0.765052	0.253649	0.0224426	0.358076	0.00486585	0.936613	0.698314
PE O-34:2	PE-O	RP_Neg, RP_PosMSMS_319, 716		Y	nonGL	PE O-16:1_18:1 M-H Atlas, PE O-16:1_18:1 M+H Atlas --- PE O-18:2_16:0 M+H Atlas													RFPQMVKZNQOUGY-KXYOHKLBNA-N, DTCDFXFLIGTQDK-BCTRXSSUNA-N, RFPQMVKZNQOUGY-KXYOHKLBNA-N	C39H76NO7P	2, 1	M-H, M+H	700.5286, 702.5391	281.247	6.745	6.695	67.2043	28.2864	94.6565	100	0.14669	0.192407	0.379433	-0.0906834	0.530647	0.985013	0.215088	0.451774	0.765052	0.158124	0.174729	0.582385	0.0395938	0.533311	0.590557
ST 21:2;O2	ST - Steroids	RP_PosMS1_28		Y	nonGL	14(15)-EET methyl ester M+H-H2O NIST --- 5(6)-EET methyl ester M+H-H2O NIST --- 5-(8,11-Pentadecadienyl)-1,3-benzenediol M+H HMDB --- 5-Pregnen-3.beta.-ol-20-one M+H NIST --- 5.alpha.-Pregnan-3,20-dione M+H NIST --- 8(9)-EET methyl ester M+H-H2O NIST --- Bolasterone M+H NIST	Lipids and lipid-like molecules --- Benzenoids	Steroids and steroid derivatives --- Phenols	Pregnane steroids --- Androstane steroids --- Benzenediols	HMDB0000253, HMDB0006048, HMDB0038534	Pregnenolone --- Bolasterone --- 5-(8,11-Pentadecadienyl)-1,3-benzenediol	Polyketides [PR] --- Sterols [ST]	Steroids [ST02]	C19 steroids (androgens) and derivatives [ST0202] --- C21 steroids (gluco/mineralocorticoids, progestogins) and derivatives [ST0203]	LMPK15030021 --- LMST02020017 --- LMST02030088	5-((8Z,11Z)-pentadeca-8,11-dien-1-yl)resorcinol --- Bolasterone --- Pregnenolone	ST 21:2;O2		IVFYLRMMHVYGJH-VLOLGRDOSA-N, MQCWCUDQEBWUAM-PHTXUDHCSA-N, ORNBQBCIOKFOEO-QGVNFLHTSA-N, UFMJCOLGRWKUKO-UTOQUPLUSA-N, XAOMBLXPIQCTNG-LKRWDBQESA-N, XGESKIWNDBIILZ-JPFHKJGASA-N, XMRPGKVKISIQBV-VLARAHDLSA-N	C21H32O2	1	M+H --- M+H-H2O	317.251		0.6	0.6	34.4086	12.0949	97.7099	100	0.144418	0.192524	0.379433	0.216478	0.126665	0.985013	0.282517	0.315011	0.765052	0.138991	0.226178	0.622717	0.101523	0.102819	0.369753
LNAPE N-40:3	LNAPE	RP_NegMSMS_537		Y	nonGL	LNAPE 20:3/N-20:0 M-H Atlas													QMLKZGPQQANVQF-HLMRNWPHNA-N	C45H84NO8P	2	M-H	796.585	305.248	6.79	6.77	62.2642	14.0079	97.7099	100	0.146707	0.195671	0.384565	0.158807	0.274753	0.985013	0.276908	0.335805	0.765052	0.0745797	0.526658	0.737485	0.0908342	0.154294	0.401005
FA 5:1;O2	FA - Fatty Acids and Conjugates	HILIC_PosMS1_173		Y	nonGL	D-(-)-Ribose M+H-H2O NIST --- D-Arabinose M+H-H2O NIST --- D-Lyxose M+H-H2O NIST --- D-Xylose M+H-H2O NIST --- D-Xylulose M+H-H2O NIST --- DL-Arabinose M+H-H2O NIST --- Ethyl hydrogen malonate M+H NIST --- Ethylmalonic acid M+H NIST --- Glutaric acid M+H NIST --- L-Xylulose M+H-H2O NIST	Organic acids and derivatives --- Lipids and lipid-like molecules --- Organic oxygen compounds	Carboxylic acids and derivatives --- Fatty Acyls --- Organooxygen compounds	Dicarboxylic acids and derivatives --- Fatty acids and conjugates --- Carbohydrates and carbohydrate conjugates	HMDB0000576, HMDB0000622, HMDB0000661, HMDB0250736	Monoethyl malonic acid --- Ethylmalonic acid --- Glutaric acid --- D-Arabinopyranose	Fatty Acyls [FA]	Fatty Acids and Conjugates [FA01]	Dicarboxylic acids [FA0117]	LMFA01170105	Ethylmalonic acid	FA 5:1;O2		HGINADPHJQTSKN-UHFFFAOYSA-N, HMFHBZSHGGEWLO-OWMBCFKOSA-N, HMFHBZSHGGEWLO-YJJZDMTNSA-N, JFCQEDHGNNZCLN-UHFFFAOYSA-N, LQXVFWRQNMEDEE-OVEKKEMJSA-N, SRBFZHDQGSBBOR-GTRNTEOOSA-N, SRBFZHDQGSBBOR-NLJOEYPJSA-N, SRBFZHDQGSBBOR-UHFFFAOYSA-N, UKFXDFUAPNAMPJ-UHFFFAOYSA-N, ZAQJHHRNXZUBTE-UHFFFAOYSA-N	C5H10O5, C5H8O4	1	M+H --- M+H-H2O	133.052		7.44	7.46	50.8108	16.7304	90.9774	100	0.139988	0.196406	0.38494	-0.0260487	0.851742	0.993093	0.395576	0.149084	0.765052	0.00620405	0.956099	0.835284	0.0588672	0.335413	0.482641
MAG 18:1	MAG	RP_PosMSMS_115		Y	GL	Monoelaidin M+H NIST --- Monoolein M+H NIST						Glycerolipids [GL]	Monoradylglycerols [GL01]	Monoacylglycerols [GL0101]	LMGL01010005	MG(18:1(9Z)/0:0/0:0)[rac]	MG 18:1	MG 18:1	RZRNAYUHWVFMIP-KTKRTIGZSA-N, RZRNAYUHWVFMIP-MDZDMXLPSA-N	C21H40O4	1	M+H	357.298		3.65	3.65	100	7.87941	100	100	-0.144208	0.197764	0.38653	-0.194656	0.174514	0.985013	0.167279	0.556589	0.765052	0.16705	0.149283	0.556915	-0.0750251	0.234197	0.443666
LPE 20:2	LPE	HILIC_NegMS1_1086		Y	nonGL	LPE 20:2 M-H Atlas --- PE O-16:2_4:0 M-H Atlas --- PE O-17:2_3:0 M-H Atlas --- PE O-18:2_2:0 M-H Atlas	Lipids and lipid-like molecules	Glycerophospholipids	Glycerophosphoethanolamines	HMDB0011513	LysoPE(20:2(11Z,14Z)/0:0)	Glycerophospholipids [GP]	Glycerophosphoethanolamines [GP02]	Monoacylglycerophosphoethanolamines [GP0205]	LMGP02050021	PE(20:2(11Z,14Z)/0:0)	LPE 20:2	LPE 20:2	CRULCECOKDAPHA-NQLNTKRDNA-N, QJHRNPQXCMXOOH-HZJYTTRNNA-N, RPFNYMHCQXBGNI-HZJYTTRNNA-N, XZGCGZSTIBJSRE-NQLNTKRDNA-N	C25H48NO7P	1	M-H	504.307		8.1	8.1	56.3686	10.5598	100	100	-0.137508	0.198688	0.387266	-0.0882226	0.521026	0.985013	-0.256827	0.344152	0.765052	-0.14756	0.182812	0.589712	-0.073296	0.223779	0.443666
DAG 16:0	DAG	HILIC_PosMS1_1270		Y	GL	DG 8:0_8:0 M+NH4 Atlas	Lipids and lipid-like molecules	Glycerolipids	Diradylglycerols	HMDB0116368, HMDB0244086	DG(8:0/8:0/0:0) --- 1,2-Dioctanoylglycerol								ZQBULZYTDGUSSK-UHFFFAOYNA-N	C19H36O5	1	M+NH4	362.289		1.34	1.33	42.7027	15.8789	76.6917	100	-0.143089	0.200369	0.389471	-0.130556	0.362694	0.985013	-0.128955	0.649836	0.765052	0.106581	0.358044	0.671205	-0.0769238	0.221535	0.443666
LNAPE N-38:1	LNAPE	RP_NegMSMS_471		Y	nonGL	LNAPE 18:1/N-20:0 M-H Atlas													FPTSLKCBYZXNAK-UZYVYHOENA-N	C43H84NO8P	2	M-H	772.586	283.263	7.05	7.03	63.6119	13.5631	97.7099	100	0.145182	0.2019	0.391371	0.12964	0.37468	0.985013	0.072192	0.80293	0.768914	0.133164	0.258816	0.636017	0.0746064	0.244344	0.443666
TAG 48:4	TAG	RP_PosMSMS_1081		Y	GL	TG 12:0_18:2_18:2 M+NH4 Atlas						Glycerolipids [GL]	Triradylglycerols [GL03]	Triacylglycerols [GL0301]	LMGL03012671	TG(12:0/18:2(9Z,12Z)/18:2(9Z,12Z))[iso3]	TG 48:4	TG 12:0_18:2_18:2	QYGNVKAJARKXER-BHNJGKJNNA-N	C51H90O6	1	M+NH4	816.702		9.88	9.83	43.5484	12.042	22.9008	100	0.141452	0.202822	0.391699	0.0380358	0.790004	0.993093	0.139063	0.62228	0.765052	0.0353892	0.759248	0.80495	0.0590367	0.345929	0.491928
TAG 58:11	TAG	RP_PosMSMS_1428, 1438		Y	GL	TG 16:0_20:5_22:6 M+NH4 Atlas --- TG 18:2_20:4_20:5 M+NH4 Atlas, TG 16:0_20:5_22:6 M+Na Atlas --- TG 18:2_20:4_20:5 M+Na Atlas	Lipids and lipid-like molecules	Glycerolipids	Triradylcglycerols	HMDB0044583, HMDB0052782	TG(16:0/20:5(5Z,8Z,11Z,14Z,17Z)/22:6(4Z,7Z,10Z,13Z,16Z,19Z)) --- TG(18:2(9Z,12Z)/20:4(8Z,11Z,14Z,17Z)/20:5(5Z,8Z,11Z,14Z,17Z))	Glycerolipids [GL]	Triradylglycerols [GL03]	Triacylglycerols [GL0301]	LMGL03011613	TG(16:0/20:5(5Z,8Z,11Z,14Z,17Z)/22:6(4Z,7Z,10Z,13Z,16Z,19Z))[iso6]	TG 58:11	TG 16:0_20:5_22:6	UGZBFOQDGPJMST-DIILDJLYNA-N, UZFNMPJCAIVEGV-RJPYUBGTNA-N	C61H96O6	1	M+NH4, M+Na	942.7478, 947.705		9.955	9.92	68.0108	7.37601	98.4733	100	0.134029	0.203176	0.391699	0.0905594	0.50332	0.985013	0.137641	0.607102	0.765052	-0.112679	0.302283	0.653825	0.0667578	0.26059	0.447247
FA 23:0	FA - Fatty Acids and Conjugates	HILIC_NegMS1_747		Y	nonGL	FA 23:0 M-H Atlas --- Tricosanoic acid M-H HMDB	Lipids and lipid-like molecules	Fatty Acyls	Fatty acids and conjugates	HMDB0001160	Tricosanoic acid	Fatty Acyls [FA]	Fatty Acids and Conjugates [FA01]	Straight chain fatty acids [FA0101]	LMFA01010023	Tricosylic acid	FA 23:0		XEZVDURJDFGERA-UHFFFAOYSA-N	C23H46O2	1	M-H	353.341		1.22	1.23	46.3415	21.6866	84.9624	100	-0.1444	0.204552	0.393279	-0.33354	0.0209365	0.985013	-0.253647	0.379939	0.765052	-0.0948468	0.422172	0.695343	-0.122699	0.0542109	0.336408
TAG 50:5	TAG	RP_PosMSMS_1162		Y	GL	TG 14:0_18:2_18:3 M+NH4 Atlas	Lipids and lipid-like molecules	Glycerolipids	Triradylcglycerols	HMDB0042534	TG(14:0/18:2(9Z,12Z)/18:3(9Z,12Z,15Z))	Glycerolipids [GL]	Triradylglycerols [GL03]	Triacylglycerols [GL0301]	LMGL03014383	TG(14:0/18:2(9Z,12Z)/18:3(9Z,12Z,15Z))[iso6]	TG 50:5	TG 14:0_18:2_18:3	BVZCCLFFAYZNFZ-ZBLLSRFYNA-N	C53H92O6	1	M+NH4	842.718		10	9.99	73.3871	7.48531	100	100	0.139482	0.206204	0.393438	0.000661889	0.996279	0.998614	0.12778	0.64867	0.765052	-0.0351658	0.759183	0.80495	0.0506377	0.416033	0.528319
PC 36:2	PC	RP_Pos, RP_NegMSMS_974, 1046, 623		Y	nonGL	1,2-Di-(9Z-octadecenoyl)-sn-glycero-3-phosphocholine M+H NIST --- 1-Stearoyl-2-linoleoyl-sn-glycero-3-phosphocholine M+H NIST, PC 36:2 M+Na Atlas, PC 18:0_18:2 M+HCOO Atlas	Lipids and lipid-like molecules	Glycerophospholipids	Glycerophosphocholines	HMDB0008039, HMDB0000593	PC(18:1(9Z)/18:1(9Z)) --- PC(18:0/18:2(9Z,12Z))	Glycerophospholipids [GP]	Glycerophosphocholines [GP01]	Diacylglycerophosphocholines [GP0101]	LMGP01010768, LMGP01010876 --- LMGP01010890	PC(18:0/18:2(9Z,12Z)), PC(18:1(9E)/18:1(9E)) --- PC(18:1(9Z)/18:1(9Z))	PC 36:2	PC 18:0_18:2, PC 18:1/18:1	FORFDCPQKJHEBF-VPUSDGANSA-N, SNKAWJBJQDLSFF-YEUCEMRASA-N, OQIUJECZRPKREF-GJLVVWLQNA-N, SNKAWJBJQDLSFF-YEUCEMRANA-N, FORFDCPQKJHEBF-IUFKAHDJNA-N	C44H84NO8P	1, 2	M+H, M+Na, M+HCOO	786.5964, 808.5782, 830.5918	146.975, 508.3352	6.59	6.58	99.4624	18.0013	100	100	0.142115	0.20628	0.393438	0.0955808	0.508188	0.985013	0.251416	0.378343	0.765052	-0.0406955	0.727726	0.799097	0.0759097	0.230614	0.443666
Cinnamic acid --- trans-Cinnamic acid	Cinnamic acids and derivatives	HILIC_Neg, HILIC_PosMSMS_114, 163			nonGL	Cinnamic acid M-H HMDB --- trans-Cinnamic acid M-H HMDB, trans-Cinnamic acid M+H-H2O NIST	Phenylpropanoids and polyketides	Cinnamic acids and derivatives	Cinnamic acids	HMDB0000567, HMDB0000930	Cinnamic acid --- trans-Cinnamic acid								WBYWAXJHAXSJNI-SREVYHEPSA-N, WBYWAXJHAXSJNI-VOTSOKGWSA-N, WBYWAXJHAXSJNI-VOTSOKGWSA-N	C9H8O2	1	M-H, M+H-H2O	147.0448, 131.0485		10.185	10.19	100	4.58573	100	100	-0.140587	0.206332	0.393438	-0.0922251	0.518755	0.985013	-0.394416	0.161199	0.765052	0.121769	0.291161	0.653825	-0.0818407	0.191133	0.428791
LPC 20:4	LPC	RP_Pos, RP_NegMSMS_428, 460, 199		Y	nonGL	LPC 20:4-SN1 M+H Atlas --- LPC 20:4-SN2 M+H Atlas --- PC O-20:4 M+H Atlas, LPC 20:4 M+Na Atlas, LPC 20:4 M+HCOO Atlas	Lipids and lipid-like molecules	Glycerophospholipids	Glycerophosphocholines	HMDB0010396	LysoPC(20:4(8Z,11Z,14Z,17Z)/0:0)	Glycerophospholipids [GP]	Glycerophosphocholines [GP01]	Monoacylglycerophosphocholines [GP0105]	LMGP01050140	PC(20:4(8Z,11Z,14Z,17Z)/0:0)	LPC 20:4	LPC 20:4	GOMVPVRDBLLHQC-DOFZRALJNA-N, YDVXUVKGSHUSRO-GKFVBPDJNA-N, GOMVPVRDBLLHQC-DOFZRALJNA-N	C28H50NO7P	1, 2	M+H, M+Na, M+HCOO	544.3375, 566.3195, 588.3309	303.231	2.51	2.56	67.7419	14.9231	100	100	-0.12851	0.206859	0.393438	-0.0191646	0.883626	0.997945	-0.151657	0.557688	0.765052	-0.170348	0.105292	0.513382	-0.0519135	0.36596	0.499067
Methionine sulfone	Amino acids, peptides, and analogues	HILIC_NegMSMS_240			nonGL	DL-Methionine sulfone M-H HMDB --- L-Methionine sulfone; LC-ESI-QTOF; MS2; CE M-H MassBank	Organic acids and derivatives	Carboxylic acids and derivatives	Amino acids, peptides, and analogues	HMDB0062174, HMDB0242144	Methionine sulfone --- DL-Methionine sulfone								UCUNFLYVYCGDHP-BYPYZUCNSA-N, UCUNFLYVYCGDHP-UHFFFAOYSA-N	C5H11NO4S	1	M-H	180.033		12.69	12.69	24.6612	24.5787	68.4211	100	-0.138305	0.20796	0.394472	-0.29699	0.0334645	0.985013	-0.305494	0.272607	0.765052	0.165699	0.144671	0.542199	-0.116269	0.0587715	0.336408
5-Hydroxyindole --- Indoxyl	Indoles and derivatives	HILIC_NegMS1_72	RT_2		nonGL	4-Hydroxybenzeneacetonitrile M-H HMDB --- 4-Hydroxybenzylcyanide M-H FiehnHILIC --- 5-Hydroxyindole M-H HMDB --- Indoxyl M-H HMDB	Organoheterocyclic compounds	Indoles and derivatives	Hydroxyindoles	HMDB0004094, HMDB0059805	Indoxyl --- 5-Hydroxyindole								AYKYOOPFBCOXSL-UHFFFAOYSA-N, LMIQERWZRIFWNZ-UHFFFAOYSA-N, PCKPVGOLPKLUHR-UHFFFAOYSA-N	C8H7NO	1	M-H	132.045		7.45	7.45	33.3333	13.3288	92.4812	100	0.140022	0.20873	0.394504	-0.187236	0.189272	0.985013	0.294909	0.296474	0.765052	-0.0417363	0.718497	0.799097	0.0227771	0.717397	0.64228
CAR 11:1	CAR	HILIC_PosMSMS_1111		Y	nonGL	CAR 11:1 M Atlas														C18H34NO4	2	M	328.248	85.0273	1.99	1.99	90.2703	5.12604	100	100	0.137403	0.209092	0.394504	0.205093	0.142717	0.985013	0.0890941	0.748688	0.765052	-0.0105891	0.925826	0.833368	0.0875478	0.15464	0.401005
N-Cyclohexyltaurine	Xenobiotics	HILIC_Pos, HILIC_NegMSMS_522, 1454, 890, 301			nonGL	2-(Cyclohexylamino)ethanesulfonic acid M+H NIST, 2-(Cyclohexylamino)ethanesulfonic acid 2M+H NIST, 2-(Cyclohexylamino)ethanesulfonic acid 2M-H NIST, 2-(Cyclohexylamino)ethanesulfonic acid M-H NIST --- N-Cyclohexyltaurine M-H HMDB	Organic nitrogen compounds	Organonitrogen compounds	Cyclohexylamines	HMDB0255106	N-Cyclohexyltaurine								MKWKNSIESPFAQN-UHFFFAOYSA-N	C8H17NO3S	2, 1	M+H, 2M+H, 2M-H, M-H	208.1001, 415.1925, 413.1762, 206.0856	108.009	8.27	8.28	44.5946	14.2875	100	100	-0.137737	0.211502	0.397991	-0.13244	0.349122	0.985013	-0.265628	0.342229	0.765052	0.003776	0.97372	0.840737	-0.0823426	0.184309	0.424651
3,4,5-Trimethoxycinnamic acid	Cinnamic acids and derivatives	HILIC_PosMS1_638			nonGL	3,4,5-Trimethoxycinnamic acid M+H HMDB --- 3,4,5-Trimethoxycinnamic acid M+H NIST --- 3,4,5-Trimethoxycinnamic acid; LC-ESI-QTOF; MS2; CE M+H MassBank --- 3,4,5-Trimethoxycinnamic_acid; LC-ESI-ITFT; MS2; CE 35 eV; [M+H]+ M+H MassBank --- 3,4,5-Trimethoxycinnamic_acid; LC-ESI-ITFT; MS2; CE 45 eV; [M+H]+ M+H MassBank --- 3,4,5-Trimethoxycinnamic_acid; LC-ESI-ITFT; MS2; CE 55 eV; [M+H]+ M+H MassBank…	Phenylpropanoids and polyketides	Cinnamic acids and derivatives	Hydroxycinnamic acids and derivatives	HMDB0002511	3,4,5-Trimethoxycinnamic acid								YTFVRYKNXDADBI-SNAWJCMRSA-N	C12H14O5	1	M+H	239.089		13.03	13.03	72.7027	18.4825	60.1504	100	0.14087	0.212921	0.399597	-0.0247948	0.864618	0.993093	0.0751023	0.793934	0.767977	0.113501	0.333291	0.665816	0.0435592	0.49502	0.572409
5-Aminovaleric acid	Amino acids, peptides, and analogues	HILIC_PosMSMS_57			nonGL	5-Aminovaleric acid M+H-H2O NIST	Organic acids and derivatives	Carboxylic acids and derivatives	Amino acids, peptides, and analogues	HMDB0003355	5-Aminopentanoic acid	Fatty Acyls [FA]	Fatty Acids and Conjugates [FA01]	Amino fatty acids [FA0110]	LMFA01100040	5-amino-pentanoic acid			JJMDCOVWQOJGCB-UHFFFAOYSA-N	C5H11NO2	1	M+H-H2O	100.075		1.54	1.53	88.6486	4.38965	68.4211	100	0.138976	0.213941	0.400449	0.046644	0.745591	0.993093	-0.137358	0.628831	0.765052	-0.0148533	0.89834	0.832797	0.046261	0.463525	0.558537
N-Acetylaspartylglutamic acid	Amino acids, peptides, and analogues	HILIC_NegMS1_590	RT_3		nonGL	N-Acetylaspartylglutamic acid M-H FiehnHILIC --- N-Acetylaspartylglutamic acid M-H HMDB --- N-Acetylaspartylglutamic acid M-H NIST	Organic acids and derivatives	Carboxylic acids and derivatives	Amino acids, peptides, and analogues	HMDB0001067	N-Acetylaspartylglutamic acid								OPVPGKGADVGKTG-BQBZGAKWSA-N, OPVPGKGADVGKTG-UHFFFAOYNA-N	C11H16N2O8	1	M-H	303.079		14.18	14.2	25.7453	14.9274	71.4286	100	-0.135816	0.214809	0.401013	-0.0528393	0.707338	0.993093	-0.213531	0.442391	0.765052	-0.00843024	0.940964	0.833617	-0.063788	0.301255	0.469318
L-Cystine	Amino acids, peptides, and analogues	HILIC_PosMSMS_642			nonGL	Cystine M+H HMDB --- L-Cystine M+H HMDB --- L-Cystine M+H NIST	Organic acids and derivatives	Carboxylic acids and derivatives	Amino acids, peptides, and analogues	HMDB0000192, HMDB0250712	L-Cystine --- Cystine								LEVWYRKDKASIDU-IMJSIDKUSA-N, LEVWYRKDKASIDU-UHFFFAOYSA-N	C6H12N2O4S2	2	M+H	241.031	120.01	15.91	15.91	10	13.76	12.0301	80.7018	0.13706	0.217303	0.403788	0.00721186	0.959735	0.998614	-0.150561	0.593744	0.765052	0.176753	0.123688	0.519961	0.0373866	0.551116	0.598504
Cholesterol 3-sulfate	ST - Steroid conjugates	RP_NegMSMS_113		Y	nonGL	Cholesterol 3-sulfate M-H NIST	Lipids and lipid-like molecules	Steroids and steroid derivatives	Cholestane steroids	HMDB0000653	Cholesterol sulfate	Sterols [ST]	Steroid conjugates [ST05]	Sulfates [ST0502]	LMST05020016	cholesterol sulfate	ST 27:1;O;S		BHYOQNUELFTYRT-DPAQBDIFSA-N	C27H46O4S	2	M-H	465.304	96.9591	3.63	3.62	95.9569	26.1961	100	100	0.11542	0.217437	0.403788	-0.0690648	0.565674	0.988506	-0.00110423	0.996297	0.787268	-0.0105975	0.913259	0.832797	0.0231814	0.660959	0.628647
FA 20:5;O2	FA - Eicosanoids	HILIC_NegMSMS_678		Y	nonGL	13,14-Dihydro-15-ketoprostaglandin A2 M-H NIST --- Prostaglandin A2 M-H NIST --- Prostaglandin B2 M-H NIST	Lipids and lipid-like molecules	Fatty Acyls	Eicosanoids	HMDB0002752	Prostaglandin A2	Fatty Acyls [FA]	Eicosanoids [FA03]	Prostaglandins [FA0301]	LMFA03010035	PGA2	FA 20:5;O2		FMKLAIBZMCURLI-MELGOLLOSA-N, MYHXHCUNDDAEOZ-FOSBLDSVSA-N, PRFXRIUZNKLRHM-UBNQNMCKSA-N	C20H30O4	1	M-H	333.206		1.52	1.65	61.2466	29.4142	25.5639	100	0.139472	0.219368	0.406307	-0.00657356	0.964091	0.998614	-0.421386	0.142252	0.765052	0.141197	0.229999	0.62499	0.0221114	0.730319	0.64228
PE 34:1	PE	RP_Pos, RP_NegMSMS_767, 342		Y	nonGL	1-Hexadecanoyl-2-(9Z-octadecenoyl)-sn-glycero-3-phosphoethanolamine M+H NIST --- PE 16:0_18:1 M+H Atlas, PE 16:0_18:1 M-H Atlas	Lipids and lipid-like molecules	Glycerophospholipids	Glycerophosphoethanolamines	HMDB0008927	PE(16:0/18:1(9Z))	Glycerophospholipids [GP]	Glycerophosphoethanolamines [GP02]	Diacylglycerophosphoethanolamines [GP0201]	LMGP02010009	PE(16:0/18:1(9Z))	PE 34:1	PE 16:0_18:1	FHQVHHIBKUMWTI-OTMQOFQLSA-N, FHQVHHIBKUMWTI-ZCXUNETKNA-N, FHQVHHIBKUMWTI-ZCXUNETKNA-N	C39H76NO8P	2	M+H, M-H	718.5337, 716.5238	577.5154, 452.2694	6.365	6.32	93.2796	25.4209	93.1298	100	0.139639	0.219948	0.406319	-0.11502	0.431257	0.985013	0.130025	0.653077	0.765052	0.101116	0.392001	0.682663	0.0284579	0.658026	0.627444
DAG 36:4	DAG	RP_PosMSMS_559		Y	GL	DG 18:2_18:2 M+NH4 Atlas	Lipids and lipid-like molecules	Fatty Acyls	Lineolic acids and derivatives	HMDB0007248	DG(18:2(9Z,12Z)/18:2(9Z,12Z)/0:0)	Glycerolipids [GL]	Diradylglycerols [GL02]	Diacylglycerols [GL0201]	LMGL02010063	DG(18:2(9Z,12Z)/18:2(9Z,12Z)/0:0)	DG 36:4	DG 18:2_18:2	MQGBAQLIFKSMEM-MAZCIEHSNA-N	C39H68O5	1	M+NH4	634.537		6.84	6.84	68.0108	14.7955	100	100	0.14129	0.220738	0.406716	-0.102584	0.488734	0.985013	0.0524066	0.858196	0.769105	-0.139956	0.241663	0.627436	0.0275486	0.672474	0.630337
TAG 62:13	TAG	RP_PosMSMS_1530		Y	GL	TG 18:1_22:6_22:6 M+NH4 Atlas --- TG 20:3_20:4_22:6 M+NH4 Atlas	Lipids and lipid-like molecules	Glycerolipids	Triradylcglycerols	HMDB0050279	TG(18:1(9Z)/22:6(4Z,7Z,10Z,13Z,16Z,19Z)/22:6(4Z,7Z,10Z,13Z,16Z,19Z))	Glycerolipids [GL]	Triradylglycerols [GL03]	Triacylglycerols [GL0301]	LMGL03012399	TG(18:1(9Z)/22:6(4Z,7Z,10Z,13Z,16Z,19Z)/22:6(4Z,7Z,10Z,13Z,16Z,19Z))[iso3]	TG 62:13	TG 18:1_22:6_22:6	PTACBPKQWASVGS-KTSKQPPBNA-N, ZVYZJDLXLBSEEJ-VZENPPDTNA-N	C65H100O6	1	M+NH4	994.779		10.26	10.18	47.8495	20.1044	71.7557	98.2456	0.134638	0.22274	0.408819	0.148265	0.29502	0.985013	0.219136	0.434339	0.765052	-0.0168319	0.883419	0.828239	0.0821202	0.186174	0.424651
DAG 27:0	DAG	HILIC_PosMS1_1705		Y	GL	DG 27:0 M+Na Atlas	Lipids and lipid-like molecules	Glycerolipids	Diradylglycerols	HMDB0092937	DG(8:0/19:0/0:0)								JDIHVLHJBFEPBC-UHFFFAOYNA-N	C30H58O5	1	M+Na	521.418		1.93	1.88	22.7027	7.87018	59.3985	100	-0.133581	0.223035	0.408819	-0.0337539	0.810713	0.993093	-0.087801	0.752677	0.765052	0.10949	0.335553	0.665816	-0.0531838	0.389674	0.510697
2,3-Diaminopropionic acid	Amino acids, peptides, and analogues	HILIC_Pos, HILIC_NegMS1_68, 18			nonGL	2,3-Diaminopropionic acid M+H HMDB --- DL-2,3-Diaminopropionic acid M+H NIST, 2,3-Diaminopropionic acid M-H HMDB --- DL-2,3-Diaminopropionic acid M-H NIST	Organic acids and derivatives	Carboxylic acids and derivatives	Amino acids, peptides, and analogues	HMDB0002006	2,3-Diaminopropionic acid	Fatty Acyls [FA]	Fatty Acids and Conjugates [FA01]	Amino fatty acids [FA0110]	LMFA01100051	2,3-diamino-propionic acid			PECYZEOJVXMISF-REOHCLBHSA-N, PECYZEOJVXMISF-UHFFFAOYSA-N	C3H8N2O2	1	M+H, M-H	105.0693, 103.0554		10.185	10.19	80.4878	17.365	55.6391	100	-0.13697	0.224319	0.409107	-0.0426624	0.768422	0.993093	-0.380418	0.18238	0.765052	0.117195	0.316011	0.654154	-0.0704316	0.267297	0.447903
CAR 5:0	CAR	HILIC_PosMSMS_671	RT_3	Y	nonGL	CAR 5:0 M Atlas														C12H24NO4	1	M	246.17		3.7	3.67	32.7027	18.6246	38.3459	100	0.132462	0.224348	0.409107	-0.0881363	0.529068	0.985013	-0.100144	0.71776	0.765052	0.0743954	0.511069	0.730482	0.0200064	0.745267	0.64228
Pyridoxamine 5-phosphate	Pyridines and derivatives	HILIC_NegMS1_423			nonGL	Propylphosphonic acid 2M-H NIST --- Pyridoxamine 5-phosphate M-H NIST	Organoheterocyclic compounds	Pyridines and derivatives	Pyridoxamines	HMDB0001555	Pyridoxamine 5'-phosphate								NSETWVJZUWGCKE-UHFFFAOYSA-N, ZMJGSOSNSPKHNH-UHFFFAOYSA-N	C3H9O3P, C8H13N2O5P	1	2M-H --- M-H	247.046		6.9	6.9	28.9973	12.7924	66.9173	100	0.135875	0.22511	0.409441	-0.0861186	0.549479	0.9863	-0.0360818	0.899164	0.769105	-0.0887027	0.44551	0.698434	0.0246417	0.696892	0.639858
SL 32:1;O	Other lipids	HILIC_Pos, HILIC_NegMS1_1771, 1184		Y	nonGL	SL 10:0;O/22:1 M+H Atlas --- SL 10:1;O/22:0 M+H Atlas --- SL 11:0;O/21:1 M+H Atlas --- SL 11:1;O/21:0 M+H Atlas --- SL 12:0;O/20:1 M+H Atlas --- SL 12:1;O/20:0 M+H Atlas --- SL 13:0;O/19:1 M+H Atlas --- SL 13:1;O/19:0 M+H Atlas --- SL 14:0;O/18:1 M+H Atlas --- SL 14:1;O/18:0 M+H Atlas --- SL 15:0;O/17:1 M+H Atlas --- SL 15:1;O/17:0 M+H Atlas --- SL 16:0;O/16:1 M+H Atlas --- SL 16:1;O/16:0 M+H Atl…						Sphingolipids [SP]	Other Sphingolipids [SP00]		LMSP00000001				CUMPFNSNCORKMB-IMVLJIQENA-N, GODDOROWGATWSF-NTMALXAHNA-N, HNAXLHCMIKDQME-IMVLJIQENA-N, IAZKAOYXXIDRDN-MSUUIHNZNA-N, IFEAUTMIAIVYCV-IMVLJIQENA-N, JGJNMRTWLNVHFY-IMVLJIQENA-N, LYHQPUODQXQSNY-IMVLJIQENA-N, MISUMPRZSBPMAZ-IMVLJIQENA-N, NOJXTAZDKSKLCP-PFONDFGANA-N, OPODOFGYFLWTMJ-OWBHPGMINA-N, PNHKPHIZYTVDBU-YPKPFQOONA-N, PROHXVUFHAROSA-IMVLJIQENA-N, QBBAMHGFFXHHIG-NXVVXOECNA-N, QPLRICGTBKXCLZ-SQFISAM…	C32H63NO5S	1	M+H, M-H	574.454, 572.437		1.805	1.82	21.6802	6.71991	60.1504	100	-0.130988	0.226968	0.409455	-0.0937265	0.500819	0.985013	-0.285153	0.299528	0.765052	0.0129825	0.908284	0.832797	-0.0736921	0.227241	0.443666
Purine	Purines and purine derivatives	HILIC_NegMSMS_41			nonGL	Purine M-H FiehnHILIC --- Purine M-H HMDB	Organoheterocyclic compounds	Imidazopyrimidines	Purines and purine derivatives	HMDB0001366	Purine								KDCGOANMDULRCW-UHFFFAOYSA-N	C5H4N4	1	M-H	119.035		11.83	11.88	88.0759	16.4761	93.985	100	-0.132726	0.227059	0.409455	-0.198404	0.158076	0.985013	-0.384828	0.166238	0.765052	0.243461	0.0310363	0.414557	-0.0993817	0.107095	0.372645
ST 24:1;O4;S	ST - Steroid conjugates	HILIC_Pos, HILIC_NegMS1_1656, 1030		Y	nonGL	ST 24:1;O4;S M+NH4 Atlas, ST 24:1;O4;S M-H Atlas						Sterols [ST]	Steroid conjugates [ST05]	Sulfates [ST0502]	LMST05020038	3-Sulfodeoxycholic acid	ST 24:1;O4;S		ARGCPGOJOKCMSW-LLQZFEROSA-N	C24H40O7S	1	M+NH4, M-H	490.2846, 471.2436		2.155	2.16	77.8378	14.3689	39.0977	100	-0.136402	0.227619	0.409455	-0.242265	0.0932227	0.985013	-0.620422	0.0289079	0.765052	-0.0710244	0.545225	0.750396	-0.120654	0.0566182	0.336408
ST 24:1;O3	ST - Bile acids	HILIC_PosMS1_1251		Y	nonGL	Lithocholic acid M+H-H2O NIST	Lipids and lipid-like molecules	Steroids and steroid derivatives	Bile acids, alcohols and derivatives	HMDB0000381, HMDB0000713, HMDB0000717, HMDB0000761	Allolithocholic acid --- Isoallolithocholic acid --- Isolithocholic acid --- Lithocholic acid	Sterols [ST]	Bile acids and derivatives [ST04]	C24 bile acids, alcohols, and derivatives [ST0401]	LMST04010003 --- LMST04010004 --- LMST04010005 --- LMST04010006 --- LMST04010323	Alloisolithocholic Acid --- Allolithocholic acid --- Isolithocholic acid --- Lithocholic acid	ST 24:1;O3		SMEROWZSTRWXGI-UHFFFAOYSA-N	C24H40O3	1	M+H-H2O	359.298		1.99	1.95	33.7838	27.146	42.8571	100	0.119233	0.228139	0.409455	0.105236	0.407219	0.985013	-0.0459084	0.855149	0.769105	0.135136	0.186901	0.589863	0.0558375	0.316595	0.47664
CAR 14:2	CAR	HILIC_PosMSMS_1288		Y	nonGL	CAR 14:2 M Atlas														C21H38NO4	1	M	368.278		1.97	1.97	98.3784	6.00008	100	100	-0.134787	0.22816	0.409455	0.0677832	0.637167	0.993093	0.0848949	0.765203	0.765052	-0.158823	0.169882	0.578755	-0.0254267	0.687279	0.638699
Pro-Arg	Amino acids, peptides, and analogues	HILIC_PosMS1_810			nonGL	Atropine M+H-H2O NIST --- Napropamid; LC-ESI-ITFT; MS2; CE M+H MassBank --- Pro-Arg M+H NIST	Organic acids and derivatives	Carboxylic acids and derivatives	Amino acids, peptides, and analogues	HMDB0029011	Prolyl-Arginine								HMNSRTLZAJHSIK-UHFFFAOYSA-N, RKUNBYITZUJHSG-UHFFFAOYSA-N, WXZVAROIGSFCFJ-UHFFFAOYNA-N	C11H21N5O3, C17H23NO3	1	M+H --- M+H-H2O	272.165		5.51	5.52	13.7838	19.781	36.8421	100	-0.136212	0.22867	0.409455	-0.190866	0.187572	0.985013	-0.515977	0.0705117	0.765052	0.0793304	0.499515	0.726729	-0.105508	0.0965298	0.365917
D-myo-Inositol-1,2,3,5,6-pentaphosphate --- D-myo-Inositol-1,3,4,5,6-pentaphosphate	Alcohols and polyols	HILIC_NegMS1_546	RT_2		nonGL	D-myo-Inositol-1,2,3,5,6-pentaphosphate M-2H NIST --- D-myo-Inositol-1,3,4,5,6-pentaphosphate M-2H NIST	Organic oxygen compounds	Organooxygen compounds	Alcohols and polyols	HMDB0003529, HMDB0253492, HMDB0304036, HMDB0304314, HMDB0304315, HMDB0304316	myo-Inositol 1,3,4,5,6-pentakisphosphate --- inositol 1,3,4,5,6-pentakisphosphate --- 1D-myo-inositol (1,2,3,4,6)-pentakisphosphate --- D-myo-inositol (1,2,3,4,5)-pentakisphosphate --- D-myo-inositol (1,2,3,5,6) pentakisphosphate --- D-myo-inositol (1,2,4,5,6)-pentakisphosphate								CTPQAXVNYGZUAJ-OAVICHNKSA-N, CTPQAXVNYGZUAJ-UOTPTPDRSA-N	C6H17O21P5, C6H7O21P5	1	M-2H	288.94		16	16.05	45.5285	28.7704	50.3759	100	0.137336	0.229169	0.409455	0.177654	0.224577	0.985013	0.381993	0.186323	0.765052	-0.124492	0.292988	0.653825	0.0966952	0.131768	0.388039
CerPE 38:1;O2	Other lipids	HILIC_NegMS1_1274		Y	nonGL	FAHFA 22:5/26:4 M-H Atlas --- FAHFA 26:4/22:5 M-H Atlas --- PE-Cer 12:0;2O/26:1 M-H Atlas --- PE-Cer 12:1;2O/26:0 M-H Atlas --- PE-Cer 13:1;2O/25:0 M-H Atlas --- PE-Cer 14:0;2O/24:1 M-H Atlas --- PE-Cer 14:1;2O/24:0 M-H Atlas --- PE-Cer 15:1;2O/23:0 M-H Atlas --- PE-Cer 16:0;2O/22:1 M-H Atlas --- PE-Cer 16:1;2O/22:0 M-H Atlas --- PE-Cer 17:0;2O/21:1 M-H Atlas --- PE-Cer 17:1;2O/21:0 M-H Atlas ---…						Sphingolipids [SP]	Phosphosphingolipids [SP03]	Ceramide phosphoethanolamines [SP0302]	LMSP03020011 --- LMSP03020024	CerPE(d14:1(4E)/24:0) --- CerPE(d16:1(4E)/22:0)	CerPE 38:1;O2	CerPE 14:1;O2/24:0 --- CerPE 16:1;O2/22:0	AFSCCJYVWBFBSB-QOSDPKFLNA-N, AIOCUPOHBQCYRE-BENRWUELNA-N, BFSZAEFBDLYJAQ-QOSDPKFLNA-N, CNKOSPJLPBBTNF-VXPUYCOJNA-N, COZHGJNRPZDAMB-MSUUIHNZNA-N, CPGZIXLZYKCEEX-QOSDPKFLNA-N, FQWHEILARFKOCP-QOSDPKFLNA-N, HLRYYKMQIOXGGN-QOSDPKFLNA-N, HYJUMCSEVXNVRG-HNENSFHCNA-N, IMYXEDWDBUDGOL-PEZBUJJGNA-N, JBWKZAACPVGWJA-SNYPHNRXNA-N, JRYPRJRLBLTVLY-ZCXUNETKNA-N, JTGCYLCCCDMNBI-QOSDPKFLNA-N, LCBYJIDVXIOTKP-QOSDPKF…	C40H81N2O6P	1	M-H	715.57		1.05	1.05	61.2466	14.2371	98.4962	100	-0.128899	0.230322	0.410479	-0.10669	0.43925	0.985013	0.154268	0.571931	0.765052	0.208178	0.0600547	0.444426	-0.0538289	0.374309	0.501635
Guanine	Purines and purine derivatives	HILIC_Pos, HILIC_NegMSMS_273, 129	RT_2		nonGL	Guanine M+H HMDB --- Guanine M+H NIST, Guanine; LC-ESI-QTOF; MS2; CE M-H MassBank	Organoheterocyclic compounds	Imidazopyrimidines	Purines and purine derivatives	HMDB0000132	Guanine								UYTPUPDQBNUYGX-UHFFFAOYSA-N	C5H5N5O	2, 1	M+H, M-H	152.0563, 150.0418	135.029	10.145	10.18	35.4054	14.5057	55.6391	100	0.120346	0.231054	0.410748	0.0907858	0.481644	0.985013	0.156874	0.538724	0.765052	0.172308	0.0966746	0.513382	0.0634157	0.26245	0.447477
TAG 48:3	TAG	RP_PosMSMS_1085		Y	GL	TG 12:0_18:1_18:2 M+NH4 Atlas --- TG 14:0_16:1_18:2 M+NH4 Atlas --- TG 16:1_16:1_16:1 M+NH4 Atlas	Lipids and lipid-like molecules	Glycerolipids	Triradylcglycerols	HMDB0005432	TG(16:1(9Z)/16:1(9Z)/16:1(9Z))	Glycerolipids [GL]	Triradylglycerols [GL03]	Triacylglycerols [GL0301]	LMGL03010020	TG(16:1(9Z)/16:1(9Z)/16:1(9Z))	TG 48:3	TG 16:1_16:1_16:1	IWSNEFQVYNGXGZ-XFYMDHNZNA-N, PURPKTYKZMLEGI-PODSLZKANA-N, SKGWNZXOCSYJQL-BUTYCLJRSA-N	C51H92O6	1	M+NH4	818.718		10.17	10.12	75.5376	9.97332	100	100	0.132984	0.232206	0.411762	0.00450138	0.974905	0.998614	0.173267	0.539914	0.765052	-0.0155102	0.893352	0.832283	0.0515669	0.411408	0.526416
SPB 18:0;O2	SPB	HILIC_PosMSMS_983		Y	nonGL	D-erythro-Sphinganine M+H NIST	Organic nitrogen compounds	Organonitrogen compounds	Amines	HMDB0000269	Sphinganine	Sphingolipids [SP]	Sphingoid bases [SP01]	Sphinganines [SP0102]	LMSP01020001	Sphinganine	SPB 18:0;O2		OTKJDMGTUTTYMP-ZWKOTPCHSA-N	C18H39NO2	1	M+H	302.305		2.27	2.29	98.9189	10.2282	100	100	0.132056	0.233134	0.412373	0.0616523	0.664854	0.993093	0.256888	0.360507	0.765052	0.0909093	0.428973	0.695343	0.0664404	0.286919	0.463424
SM 44:2;O2	SM	RP_Pos, RP_NegMSMS_1158, 730, 1230		Y	nonGL	SM 37:2;2O/7:0 M+H Atlas, SM 37:2;2O/7:0 M+HCOO Atlas, SM 44:2;2O M+Na Atlas													GNOWQGCTMGEYJT-ZENFDKDKNA-N, VLXMWWQFLNFQCC-NFYLBXPENA-N	C49H97N2O6P	1	M+H, M+HCOO, M+Na	841.7093, 885.7077, 863.6934		8.18	8.15	31.1828	16.7872	77.0992	100	0.134119	0.236404	0.416975	0.0280207	0.847386	0.993093	-0.350501	0.221727	0.765052	-0.291124	0.0119996	0.318786	0.0305975	0.632333	0.620637
ST 19:1;O2;S	ST - Steroid conjugates	HILIC_NegMSMS_787	RT_2	Y	nonGL	Androsterone sulfate M-H NIST	Lipids and lipid-like molecules	Steroids and steroid derivatives	Sulfated steroids	HMDB0002759	Androsterone sulfate	Sterols [ST]	Steroid conjugates [ST05]	Sulfates [ST0502]	LMST05020001	5alpha-androstane-3alpha-ol-17-one sulfate	ST 19:1;O2;S		ZMITXKRGXGRMKS-HLUDHZFRSA-N	C19H30O5S	1	M-H	369.173		6.56	6.62	33.8753	12.1529	93.2331	100	0.125153	0.237189	0.416975	0.155209	0.252563	0.985013	0.118211	0.66032	0.765052	0.0087554	0.936583	0.833368	0.0754707	0.205181	0.433229
3,4-Dihydroxyhydrocinnamic acid	Xenobiotics	HILIC_PosMSMS_343			nonGL	7-Hydroxychromanone M+H NIST --- Benzenepropanoic acid, 3,4-dihydroxy- M+H-H2O NIST --- p-Coumaric acid M+H FiehnHILIC	Phenylpropanoids and polyketides	Phenylpropanoic acids		HMDB0000423	3,4-Dihydroxyhydrocinnamic acid								DZAUWHJDUNRCTF-UHFFFAOYSA-N, GPJCOQPUQUEBTB-UHFFFAOYSA-N, NGSWKAQJJWESNS-UHFFFAOYSA-N	C9H10O4	1	M+H --- M+H-H2O	165.054		1.75	1.76	41.8919	13.1343	80.4511	100	-0.132421	0.237888	0.416975	-0.229405	0.109389	0.985013	0.0500256	0.860733	0.769105	0.0870301	0.454812	0.70589	-0.0837923	0.184182	0.424651
2'-O-Methyluridine	Pyrimidine nucleosides	HILIC_NegMSMS_453			nonGL	2'-O-Methyluridine M-H HMDB	Nucleosides, nucleotides, and analogues	Pyrimidine nucleosides		HMDB0240328	2'-O-Methyluridine								SXUXMRMBWZCMEN-ZOQUXTDFSA-N	C10H14N2O6	1	M-H	257.078		3.33	3.37	85.9079	13.6111	61.6541	100	0.127055	0.238092	0.416975	0.160557	0.24452	0.985013	0.00753829	0.978029	0.782875	0.183113	0.0995255	0.513382	0.0716395	0.237311	0.443666
ST 18:3;O3;GlcA	ST - Steroid conjugates	RP_PosMS1_295	RT_2	Y	nonGL	Epiyangambin M+H HMDB --- Estriol 16.alpha.-(.beta.-D-glucuronide) M+H-H2O NIST	Lipids and lipid-like molecules --- Lignans, neolignans and related compounds	Steroids and steroid derivatives --- Furanoid lignans	Steroidal glycosides --- NA	HMDB0006766, HMDB0251868	Estriol-16-Glucuronide --- Epiyangambin	Sterols [ST]	Steroid conjugates [ST05]	Glucuronides [ST0501]	LMST05010008	16alpha,17beta-Estriol 16-(beta-D-glucuronide)	ST 18:3;O3;GlcA		FQYGGFDZJFIDPU-JRSYHJKYSA-N, HRLFUIXSXUASEX-UHFFFAOYSA-N	C24H30O8, C24H32O9	1	M+H --- M+H-H2O	447.204		1.73	1.72	42.2043	29.1682	44.2748	96.4912	0.132848	0.240331	0.419856	0.0592671	0.683498	0.993093	0.132083	0.645831	0.765052	-0.306156	0.00805473	0.283279	0.0600659	0.346225	0.491928
PC 30:0	PC	RP_Pos, RP_NegMSMS, MS1_728, 793, 420		Y	nonGL	1-Myristoyl-2-palmitoyl-sn-glycero-3-phosphocholine M+H NIST --- 1-Palmitoyl-2-myristoyl-sn-glycero-3-phosphocholine M+H NIST, 1-Palmitoyl-2-myristoyl-sn-glycero-3-phosphocholine M+Na NIST --- NAGlySer 18:5/19:2 M+NH4 Atlas --- NAGlySer 20:5/17:2 M+NH4 Atlas --- NAGlySer 22:6/15:1 M+NH4 Atlas --- NAGlySer 24:6/13:1 M+NH4 Atlas --- NAGlySer 26:7/11:0 M+NH4 Atlas --- PC 10:0_22:3 M+H Atlas --- PC 1…	Lipids and lipid-like molecules	Glycerophospholipids	Glycerophosphocholines	HMDB0007869, HMDB0007965, HMDB0007965	PC(14:0/16:0) --- PC(16:0/14:0)	Glycerophospholipids [GP]	Glycerophosphocholines [GP01]	Diacylglycerophosphocholines [GP0101]	LMGP01010481 --- LMGP01010560, LMGP01010560, LMGP01010481	PC(14:0/16:0) --- PC(16:0/14:0), PC(16:0/14:0), PC(14:0/16:0)	PC 30:0	PC 14:0_16:0	RFVFQQWKPSOBED-PSXMRANNSA-N, UIXXHROAQSBBOV-PSXMRANNSA-N, AGQKQQAJRFTOGL-ZWABBIBGNA-N, BABBHZXTJVJYCT-QTUOEJEDNA-N, BLNISTBNTVSITR-QYCRHRGJNA-N, CMNXXXZVRHHXTE-QEBOMEKHNA-N, DKVBESCPYBAPKF-ZNQQJUNXNA-N, DRJYDRMOXGTDIW-XDZFUVEGNA-N, DXZJMBJYBXKRDA-CINKVVBANA-N, FIDVSYAZKIRZID-CDHIEHIBNA-N, FLXFESILEUFIBE-KPJOMIKFNA-N, FVFGQELEZODGAD-QSUMJXGINA-N, FYHTVGWBGSRDNL-SVNQLWEDNA-N, GLAIFIDZABIAJR-KHDVSGD…	C38H76NO8P	1	M+H, M+H --- M+NH4 --- M+Na, M+HCOO	706.5352, 728.517, 750.5288		5.63	5.61	75.5376	9.65703	100	100	0.129721	0.241868	0.421501	0.031226	0.826493	0.993093	0.165309	0.556991	0.765052	0.0301177	0.793706	0.81265	0.0553009	0.376152	0.501635
PE 35:3	PE	RP_NegMSMS_363		Y	nonGL	LNAPE 18:2/N-17:1 M-H Atlas --- PE 17:1_18:2 M-H Atlas						Glycerophospholipids [GP]	Glycerophosphoethanolamines [GP02]	Diacylglycerophosphoethanolamines [GP0201]	LMGP02010573	PE(17:1(9Z)/18:2(9Z,12Z))	PE 35:3	PE 17:1_18:2	HAJJFLNUKSWRNU-DAWNVERKNA-N, PWEQXIQRIREZMU-DAWNVERKNA-N	C40H74NO8P	1	M-H	726.508		5.91	5.81	21.8329	27.3297	23.6641	99.1228	-0.133662	0.242703	0.421917	-0.171042	0.243179	0.985013	-0.344155	0.234927	0.765052	-0.0872995	0.462207	0.709168	-0.0923851	0.150724	0.401005
TAG 62:14	TAG	RP_PosMSMS_1526, 1536		Y	GL	TG 18:2_22:6_22:6 M+NH4 Atlas --- TG 20:4_20:4_22:6 M+NH4 Atlas, TG 18:2_22:6_22:6 M+Na Atlas --- TG 20:4_20:4_22:6 M+Na Atlas	Lipids and lipid-like molecules	Glycerolipids	Triradylcglycerols	HMDB0052829, HMDB0055664	TG(18:2(9Z,12Z)/22:6(4Z,7Z,10Z,13Z,16Z,19Z)/22:6(4Z,7Z,10Z,13Z,16Z,19Z)) --- TG(20:4(8Z,11Z,14Z,17Z)/20:4(8Z,11Z,14Z,17Z)/22:6(4Z,7Z,10Z,13Z,16Z,19Z))	Glycerolipids [GL]	Triradylglycerols [GL03]	Triacylglycerols [GL0301]	LMGL03012429	TG(18:2(9Z,12Z)/22:6(4Z,7Z,10Z,13Z,16Z,19Z)/22:6(4Z,7Z,10Z,13Z,16Z,19Z))[iso3]	TG 62:14	TG 18:2_22:6_22:6	NJFNAWKYWBXFMY-CQMGPDOGNA-N, NVRVRYSEUZDNFH-KXCMKCIENA-N	C65H98O6	1	M+NH4, M+Na	992.7642, 997.7194		9.955	10.065	73.9247	10.5459	90.0763	100	0.129813	0.245272	0.425337	0.0637865	0.656737	0.993093	-0.0426665	0.880547	0.769105	-0.0722262	0.533488	0.741659	0.0513454	0.415065	0.528319
PC O-34:2	PC-O	RP_Neg, RP_PosMSMS_511, 846		Y	nonGL	PC O-16:1_18:1 M+HCOO Atlas, PC O-34:2 M+H Atlas													WDQJCKHLEYAETE-MGXYOJEMNA-N, WBAZRZTVRJLENP-LTXDKZCQNA-N	C42H82NO7P	2, 1	M+HCOO, M+H	788.5812, 744.5864	281.246	6.755	6.755	43.0108	18.4797	100	100	-0.128466	0.247471	0.428101	-0.116453	0.413893	0.985013	-0.159905	0.570778	0.765052	-0.152615	0.184178	0.589712	-0.0710953	0.255591	0.445606
N-Arachidonoyltaurine	N-acyl amines	RP_PosMS1_236			nonGL	N-Arachidonoyltaurine M+H NIST	Lipids and lipid-like molecules	Fatty Acyls	Fatty amides			Fatty Acyls [FA]	Fatty amides [FA08]	N-acyl amines [FA0802]	LMFA08020075	N-arachidonoyl taurine	NAT 20:4		YUNYSWCRLRYOPO-DOFZRALJSA-N	C22H37NO4S	1	M+H	412.252		3.71	3.72	68.0108	10.8763	90.8397	100	-0.129074	0.248541	0.428407	-0.199447	0.163289	0.985013	0.0559785	0.843874	0.769105	-0.00496074	0.965959	0.838407	-0.0766524	0.2233	0.443666
PC 42:10	PC	RP_PosMSMS_1192, 1268		Y	nonGL	PC 20:5_22:5 M+H Atlas, PC 42:10 M+Na Atlas	Lipids and lipid-like molecules	Glycerophospholipids	Glycerophosphocholines	HMDB0008517	PC(20:5(5Z,8Z,11Z,14Z,17Z)/22:5(7Z,10Z,13Z,16Z,19Z))	Glycerophospholipids [GP]	Glycerophosphocholines [GP01]	Diacylglycerophosphocholines [GP0101]	LMGP01011058	PC(20:5(5Z,8Z,11Z,14Z,17Z)/22:5(7Z,10Z,13Z,16Z,19Z))	PC 42:10	PC 20:5_22:5	KJZGPYYLCQSOIZ-DBXDPKMRNA-N	C50H80NO8P	1	M+H, M+Na	854.5638, 876.5469		5.25	5.23	46.5054	22.6374	39.6947	100	0.12641	0.249522	0.428407	-0.0816824	0.562295	0.988506	0.198468	0.476261	0.765052	-0.331514	0.00296968	0.283279	0.0340847	0.582211	0.607844
LPI 18:1	LPI	HILIC_NegMSMS_1214		Y	nonGL	LPI 18:1 M-H Atlas	Lipids and lipid-like molecules	Glycerophospholipids	Glycerophosphoinositols	HMDB0061693, HMDB0242160, HMDB0256522	LysoPI(18:1(9Z)/0:0) --- 1-Oleoyl-sn-glycero-3-phospho-D-myo-inositol(1-) --- PI(18:1(9Z)/0:0)	Glycerophospholipids [GP]	Glycerophosphoinositols [GP06]	Monoacylglycerophosphoinositols [GP0605]	LMGP06050005	PI(18:1(9Z)/0:0)	LPI 18:1	LPI 18:1	UGDOFRYHDCDVHD-KTKRTIGZNA-N	C27H50O12P, C27H51O12P	1	M-H	597.302		10.77	10.8	70.1897	17.2969	99.2481	100	0.129089	0.249706	0.428407	0.097889	0.496539	0.985013	-0.019067	0.946659	0.775558	0.144015	0.214762	0.614668	0.0588674	0.351639	0.495091
Homocysteine	Amino acids, peptides, and analogues	HILIC_PosMS1_186			nonGL	1-Hydroxybenzotriazole M+H HMDB --- DL-Homocysteine M+H NIST --- Homocysteine M+H FiehnHILIC --- L-Homocysteine; LC-ESI-ITFT; MS2; m/z M+H MassBank	Organic acids and derivatives	Carboxylic acids and derivatives	Amino acids, peptides, and analogues	HMDB0000742	Homocysteine								ASOKPJOREAFHNY-UHFFFAOYSA-N, FFFHZYDWPBMWHY-UHFFFAOYNA-N, FFFHZYDWPBMWHY-UHFFFAOYSA-N, FFFHZYDWPBMWHY-VKHMYHEASA-N	C4H9NO2S, C6H5N3O	1	M+H	136.048		13.44	13.44	50.8108	10.26	58.6466	100	0.129134	0.25007	0.428407	-0.0622613	0.665964	0.993093	-0.086649	0.761304	0.765052	0.153984	0.184935	0.589815	0.0246152	0.697767	0.639858
Betaine aldehyde	Quaternary ammonium salts	HILIC_PosMSMS_61, 123			nonGL	Betaine aldehyde cation Cat NIST, Betaine aldehyde cation Cat+H2O NIST	Organic nitrogen compounds	Organonitrogen compounds	Quaternary ammonium salts	HMDB0001252	Betaine aldehyde								SXKNCCSPZDCRFD-UHFFFAOYSA-N	C5H12NO	1	Cat, Cat+H2O	102.091, 120.1011		10.625	10.61	27.2973	14.9841	65.4135	100	0.131001	0.250766	0.428563	0.136179	0.351864	0.985013	0.615223	0.0317831	0.765052	0.0737668	0.5333	0.741659	0.0981982	0.125193	0.388039
PC 34:4	PC	RP_PosMSMS_874, 944		Y	nonGL	PC 17:2_17:2 M+H Atlas, PC 34:4 M+Na Atlas						Glycerophospholipids [GP]	Glycerophosphocholines [GP01]	Diacylglycerophosphocholines [GP0101]	LMGP01010731	PC(17:2(9Z,12Z)/17:2(9Z,12Z))	PC 34:4	PC 17:2/17:2	FJCUMLVANOXIFV-QYCRHRGJNA-N, FJCUMLVANOXIFV-QYCRHRGJNA-N, LZVHQSZWYJXUOJ-KEXYTUSZNA-N	C42H76NO8P	1	M+H, M+Na	754.5342, 776.5176		5.22	5.2	67.4731	19.8597	100	100	0.125977	0.252857	0.431094	0.0197482	0.88907	0.997945	0.0991512	0.723142	0.765052	-0.0673658	0.555888	0.754389	0.0486302	0.433771	0.539839
TAG 60:11	TAG	RP_PosMSMS_1481, 1490		Y	GL	TG 18:1_20:4_22:6 M+NH4 Atlas, TG 16:0_22:5_22:6 M+Na Atlas --- TG 18:1_20:4_22:6 M+Na Atlas	Lipids and lipid-like molecules	Glycerolipids	Triradylcglycerols	HMDB0050219, HMDB0044611	TG(16:0/22:5(7Z,10Z,13Z,16Z,19Z)/22:6(4Z,7Z,10Z,13Z,16Z,19Z)) --- TG(18:1(9Z)/20:4(8Z,11Z,14Z,17Z)/22:6(4Z,7Z,10Z,13Z,16Z,19Z))	Glycerolipids [GL]	Triradylglycerols [GL03]	Triacylglycerols [GL0301]	LMGL03012086	TG(16:0/22:5(7Z,10Z,13Z,16Z,19Z)/22:6(4Z,7Z,10Z,13Z,16Z,19Z))[iso6]	TG 60:11	TG 16:0_22:5_22:6	YDCWNPRKDZMBHL-HLTHBUFLNA-N, QVOHTEKWCOOZBV-JTUQIUDNNA-N, YDCWNPRKDZMBHL-HLTHBUFLNA-N	C63H100O6	1	M+NH4, M+Na	970.7794, 975.7357		10.355	10.325	72.5806	9.28338	97.7099	100	0.125443	0.253577	0.431283	0.0564255	0.68933	0.993093	0.085156	0.760314	0.765052	-0.0803768	0.480869	0.716738	0.0548528	0.375769	0.501635
1,2,3,6-Tetrahydrobenzylalcohol --- exo-Norbornyl alcohol	Xenobiotics	HILIC_PosMSMS_52	RT_1		nonGL	1,2,3,6-Tetrahydrobenzylalcohol M+H-H2O NIST --- exo-Norbornyl alcohol M+H-H2O NIST													VEIYJWQZNGASMA-UHFFFAOYSA-N, ZQTYQMYDIHMKQB-UHFFFAOYSA-N	C7H12O	1	M+H-H2O	95.0852		1.25	1.25	95.1351	12.3014	100	100	-0.128443	0.255193	0.43299	-0.217551	0.131499	0.985013	-0.159825	0.577109	0.765052	-0.0348015	0.766642	0.80554	-0.0906081	0.153127	0.401005
TAG 56:8	TAG	RP_PosMSMS_1384, 1396		Y	GL	TG 16:0_18:2_22:6 M+NH4 Atlas, TG 16:0_18:2_22:6 M+Na Atlas --- TG 16:0_20:4_20:4 M+Na Atlas	Lipids and lipid-like molecules	Glycerolipids	Triradylcglycerols	HMDB0044275, HMDB0044552	TG(16:0/18:2(9Z,12Z)/22:6(4Z,7Z,10Z,13Z,16Z,19Z)) --- TG(16:0/20:4(8Z,11Z,14Z,17Z)/20:4(8Z,11Z,14Z,17Z))	Glycerolipids [GL]	Triradylglycerols [GL03]	Triacylglycerols [GL0301]	LMGL03010999	TG(16:0/18:2(9Z,12Z)/22:6(4Z,7Z,10Z,13Z,16Z,19Z))[iso6]	TG 56:8	TG 16:0_18:2_22:6	RDZINTYLBOTMAU-BUNKRMPENA-N, RDZINTYLBOTMAU-BUNKRMPENA-N, USBFXACLNGOAGV-UTDWZGIUNA-N	C59H98O6	2, 1	M+NH4, M+Na	920.7628, 925.7199	647.503	10.39	10.37	88.7097	10.5613	100	100	0.126002	0.256889	0.434825	-0.0014325	0.991997	0.998614	0.0842787	0.765314	0.765052	-0.154912	0.177761	0.585473	0.043813	0.484589	0.572409
LPE 18:2	LPE	RP_NegMSMS_119		Y	nonGL	LPE 18:2 M-H Atlas	Lipids and lipid-like molecules	Glycerophospholipids	Glycerophosphoethanolamines	HMDB0011507	LysoPE(18:2(9Z,12Z)/0:0)	Glycerophospholipids [GP]	Glycerophosphoethanolamines [GP02]	Monoacylglycerophosphoethanolamines [GP0205]	LMGP02050011	PE(18:2(9Z,12Z)/0:0)	LPE 18:2	LPE 18:2	DBHKHNGBVGWQJE-HZJYTTRNNA-N	C23H44NO7P	2	M-H	476.278	279.226	2.57	2.56	74.6631	20.621	98.4733	100	-0.126143	0.258647	0.43577	-0.0663599	0.643596	0.993093	-0.114139	0.687379	0.765052	0.0192188	0.868431	0.826417	-0.0584247	0.353171	0.495091
CAR 6:0	CAR	HILIC_PosMSMS_746	RT_1	Y	nonGL	CAR 6:0 M Atlas														C13H26NO4	1	M	260.185		2.05	2.06	97.5676	28.6496	100	100	0.118585	0.258679	0.43577	0.229067	0.0871972	0.985013	0.071138	0.78969	0.766802	0.207298	0.055114	0.442848	0.0853279	0.147961	0.400433
ST 27:3;O4	ST - Bile acids	RP_PosMS1_276		Y	nonGL	Cholest-4-en-26-oic acid, 7.alpha.-hydroxy-3-oxo M+H NIST						Sterols [ST]	Bile acids and derivatives [ST04]	C27 bile acids, alcohols, and derivatives [ST0403]	LMST04030242	7alpha-hydroxy-3-oxo-4-cholestenoic acid	ST 27:3;O4		SATGKQGFUDXGAX-SLTBQWEQSA-N	C27H42O4	1	M+H	431.314		1.98	1.98	37.6344	20.1372	100	100	0.125952	0.259496	0.436108	0.396821	0.00480242	0.923985	0.413991	0.142507	0.765052	0.0466608	0.687525	0.787006	0.136994	0.0279337	0.293089
L-Asparagine	Amino acids, peptides, and analogues	HILIC_NegMSMS_66			nonGL	Asparagine M-H FiehnHILIC --- L-Asparagine M-H HMDB	Organic acids and derivatives	Carboxylic acids and derivatives	Amino acids, peptides, and analogues	HMDB0000168	L-Asparagine								DCXYFEDJOCDNAF-REOHCLBHSA-N, DCXYFEDJOCDNAF-UHFFFAOYNA-N	C4H8N2O3	1	M-H	131.046		14.36	14.37	64.2276	18.4133	100	100	-0.124198	0.260733	0.437054	0.0526691	0.710429	0.993093	-0.213607	0.445834	0.765052	-0.0514533	0.653667	0.785957	-0.0397348	0.523592	0.587319
Phosphatidylethanolamine lyso 22	Other lipids	HILIC_NegMS1_1123		Y	nonGL	Phosphatidylethanolamine lyso 22 M-H MassBank													FGMFOVUNMMIBGB-SNPVRQPZNA-N	C27H44NO7P, C27H48NO7P	1	M-H	528.306		8.01	8.01	46.3415	11.4706	96.9925	100	-0.122302	0.261294	0.437054	-0.0716788	0.608175	0.993093	-0.150923	0.58508	0.765052	-0.214107	0.0561091	0.442848	-0.0600518	0.32753	0.482274
TAG 58:10	TAG	RP_PosMSMS_1432, 1441		Y	GL	TG 16:0_20:4_22:6 M+NH4 Atlas --- TG 18:1_18:3_22:6 M+NH4 Atlas --- TG 18:2_18:2_22:6 M+NH4 Atlas --- TG 18:2_20:4_20:4 M+NH4 Atlas, TG 16:0_20:4_22:6 M+Na Atlas --- TG 18:1_20:4_20:5 M+Na Atlas --- TG 18:2_18:2_22:6 M+Na Atlas --- TG 18:2_20:4_20:4 M+Na Atlas	Lipids and lipid-like molecules	Glycerolipids	Triradylcglycerols	HMDB0044555, HMDB0050179, HMDB0052781, HMDB0010496, HMDB0050217	TG(18:2(9Z,12Z)/18:2(9Z,12Z)/22:6(4Z,7Z,10Z,13Z,16Z,19Z)) --- TG(16:0/20:4(8Z,11Z,14Z,17Z)/22:6(4Z,7Z,10Z,13Z,16Z,19Z)) --- TG(18:1(9Z)/18:3(9Z,12Z,15Z)/22:6(4Z,7Z,10Z,13Z,16Z,19Z)) --- TG(18:1(9Z)/20:4(8Z,11Z,14Z,17Z)/20:5(5Z,8Z,11Z,14Z,17Z)) --- TG(18:2(9Z,12Z)/20:4(8Z,11Z,14Z,17Z)/20:4(8Z,11Z,14Z,17Z))	Glycerolipids [GL]	Triradylglycerols [GL03]	Triacylglycerols [GL0301]	LMGL03011543 --- LMGL03011544, LMGL03011544	TG(18:1(9Z)/18:3(9Z,12Z,15Z)/22:6(4Z,7Z,10Z,13Z,16Z,19Z))[iso6] --- TG(18:2(9Z,12Z)/18:2(9Z,12Z)/22:6(4Z,7Z,10Z,13Z,16Z,19Z))[iso3], TG(18:2(9Z,12Z)/18:2(9Z,12Z)/22:6(4Z,7Z,10Z,13Z,16Z,19Z))[iso3]	TG 58:10	TG 18:1_18:3_22:6 --- TG 18:2_18:2_22:6, TG 18:2_18:2_22:6	AHSZOTPDQMNZHG-UUYLMGCANA-N, BHTDMDDGPQHTNH-DAPPMKOPNA-N, HCEQQESIFLFUPF-BZCFYLIVNA-N, YNVHIDISXOPRLL-HQQFMMERNA-N, BHTDMDDGPQHTNH-DAPPMKOPNA-N, HCEQQESIFLFUPF-BZCFYLIVNA-N, KHNMVUXCIUHLCK-SNMYQICYNA-N, YNVHIDISXOPRLL-HQQFMMERNA-N	C61H98O6	2, 1	M+NH4, M+Na	944.763, 949.72	599.497	10.25	10.21	77.6882	10.1396	98.4733	100	0.122565	0.265923	0.443748	-0.0242774	0.863823	0.993093	0.0261782	0.925487	0.769809	-0.139172	0.22228	0.620965	0.0354423	0.568552	0.603774
SM 44:3;O2	SM	RP_PosMSMS_1218		Y	nonGL	SM 44:3;2O M+Na Atlas													JDBHJRJLTGULOS-SKFHMOIXNA-N	C49H95N2O6P	1	M+Na	861.678		7.7	7.67	41.6667	16.1821	98.4733	100	-0.12307	0.266975	0.443787	-0.1592	0.262259	0.985013	-0.621979	0.0253574	0.765052	-0.343284	0.00228543	0.283279	-0.100465	0.106239	0.372645
ST 19:2;O2	ST - Steroids	HILIC_PosMSMS_806		Y	nonGL	5-Androsten-3.beta.-ol-17-one M+H-H2O NIST --- 9(11),(5.alpha.)-Androsten-3.beta.-ol-17-one M+H-H2O NIST	Lipids and lipid-like molecules	Steroids and steroid derivatives	Androstane steroids	HMDB0000077	Dehydroepiandrosterone	Sterols [ST]	Steroids [ST02]	C19 steroids (androgens) and derivatives [ST0202]	LMST02020021	Dehydroepiandrosterone	ST 19:2;O2		FMGSKLZLMKYGDP-USOAJAOKSA-N, VFORKMIYKGJSEC-AMESJLMYSA-N	C19H28O2	1	M+H-H2O	271.205		6.1	6.14	34.8649	13.888	96.9925	100	0.113109	0.267823	0.443787	0.128631	0.325547	0.985013	0.199192	0.441763	0.765052	-0.0336529	0.75092	0.80495	0.0705215	0.21938	0.443666
TAG 55:7	TAG	RP_PosMSMS_1352		Y	GL	TG 10:0_11:0_34:7 M+NH4 Atlas --- TG 10:0_13:0_32:7 M+NH4 Atlas --- TG 10:0_13:1_32:6 M+NH4 Atlas --- TG 10:0_15:0_30:7 M+NH4 Atlas --- TG 10:0_15:1_30:6 M+NH4 Atlas --- TG 10:0_17:0_28:7 M+NH4 Atlas --- TG 10:0_17:1_28:6 M+NH4 Atlas --- TG 10:0_17:2_28:5 M+NH4 Atlas --- TG 10:0_19:0_26:7 M+NH4 Atlas --- TG 10:0_19:1_26:6 M+NH4 Atlas --- TG 10:0_19:2_26:5 M+NH4 Atlas --- TG 10:0_21:1_24:6 M+NH4 A…	Lipids and lipid-like molecules	Glycerolipids	Triradylcglycerols	HMDB0043277, HMDB0043421, HMDB0043478	TG(15:0/18:1(9Z)/22:6(4Z,7Z,10Z,13Z,16Z,19Z)) --- TG(15:0/18:2(9Z,12Z)/22:5(7Z,10Z,13Z,16Z,19Z)) --- TG(15:0/20:2n6/20:5(5Z,8Z,11Z,14Z,17Z))	Glycerolipids [GL]	Triradylglycerols [GL03]	Triacylglycerols [GL0301]	LMGL03010543 --- LMGL03010560 --- LMGL03010561 --- LMGL03010562 --- LMGL03010711 --- LMGL03010712 --- LMGL03010714 --- LMGL03010715 --- LMGL03013082 --- LMGL03014070 --- LMGL03014080 --- LMGL03014104 --- LMGL03014480 --- LMGL03014872 --- LMGL03014885 --- LMGL03015165 --- LMGL03015183 --- LMGL03015232 --- LMGL03015292 --- LMGL03015496 --- LMGL03015515 --- LMGL03015567 --- LMGL03015582 --- LMGL0301…	TG(13:0/20:1(11Z)/22:6(4Z,7Z,10Z,13Z,16Z,19Z))[iso6] --- TG(13:0/20:2(11Z,14Z)/22:5(7Z,10Z,13Z,16Z,19Z))[iso6] --- TG(13:0/20:5(5Z,8Z,11Z,14Z,17Z)/22:2(13Z,16Z))[iso6] --- TG(14:0/19:1(9Z)/22:6(4Z,7Z,10Z,13Z,16Z,19Z))[iso6] --- TG(14:1(9Z)/19:0/22:6(4Z,7Z,10Z,13Z,16Z,19Z))[iso6] --- TG(14:1(9Z)/19:1(9Z)/22:5(7Z,10Z,13Z,16Z,19Z))[iso6] --- TG(15:0/18:1(9Z)/22:6(4Z,7Z,10Z,13Z,16Z,19Z))[iso6] --- TG…	TG 55:7	TG 13:0_20:1_22:6 --- TG 13:0_20:2_22:5 --- TG 13:0_20:5_22:2 --- TG 14:0_19:1_22:6 --- TG 14:1_19:0_22:6 --- TG 14:1_19:1_22:5 --- TG 15:0_18:1_22:6 --- TG 15:0_18:2_22:5 --- TG 15:0_18:4_22:3 --- TG 15:0_20:2_20:5 --- TG 15:1_18:0_22:6 --- TG 15:1_18:1_22:5 --- TG 15:1_18:3_22:3 --- TG 15:1_18:4_22:2 --- TG 15:1_20:1_20:5 --- TG 16:0_17:1_22:6 --- TG 16:0_17:2_22:5 --- TG 16:1_17:0_22:6 --- TG …	AALNHBCFJBISAW-RSILMUHANA-N, ACJTYPJFINZIBK-SCZPNVMENA-N, AGBVOSQKMBEOMR-GJCOZSHDNA-N, AHKBIFOIBCTDDE-IURQDWFINA-N, AJPMDOWSMZIGDB-PRBLUXKINA-N, AKDXFTUXZSCYDR-ZRZQNYRSNA-N, AKHZMTZZSCCJJY-UYPFJPMFNA-N, ALULOWZNTGURIV-JBWDVDSONA-N, AMDSVOUOPNTSLO-GTTJEWSBNA-N, ASHYPKAQBLSNHV-KBPATUDGNA-N, AUCAJUCNMSTNMJ-KQDKGLBONA-N, AYWJZJJUFAYUTL-IYNPXTIGNA-N, BAQSBBCFJUNIHC-DGBUTCIRNA-N, BGPCOCYUZRYBLB-BLXBUHL…	C58H98O6	1	M+NH4	908.769		11.14	11.15	100	9.22671	100	100	0.123812	0.267828	0.443787	0.0687447	0.631866	0.993093	0.620959	0.0268	0.765052	-0.155708	0.177815	0.585473	0.0831807	0.185431	0.424651
Alanine	Amino acids, peptides, and analogues	HILIC_NegMS1_6	RT_1		nonGL	Alanine M-H FiehnHILIC --- D-Alanine M-H HMDB --- L-Alanine M-H HMDB --- Sarcosine M-H FiehnHILIC --- Sarcosine M-H HMDB --- beta-Alanine M-H HMDB	Organic acids and derivatives	Carboxylic acids and derivatives	Amino acids, peptides, and analogues	HMDB0000056, HMDB0000161, HMDB0001310	beta-Alanine --- L-Alanine --- D-Alanine								FSYKKLYZXJSNPZ-UHFFFAOYSA-N, QNAYBMKLOCPYGJ-REOHCLBHSA-N, QNAYBMKLOCPYGJ-UHFFFAOYNA-N, QNAYBMKLOCPYGJ-UWTATZPHSA-N, UCMIRNVEIXFBKS-UHFFFAOYSA-N	C3H7NO2	1	M-H	88.0406		4.18	4.23	97.561	16.8205	100	100	-0.120876	0.269491	0.443835	-0.205854	0.141137	0.985013	-0.55039	0.0456114	0.765052	0.225254	0.0454189	0.442848	-0.105243	0.086285	0.363249
L-Serine	Amino acids, peptides, and analogues	HILIC_NegMSMS_19			nonGL	L-Serine M-H HMDB --- L-Serine M-H NIST	Organic acids and derivatives	Carboxylic acids and derivatives	Amino acids, peptides, and analogues	HMDB0000187	L-Serine	Fatty Acyls [FA]	Fatty Acids and Conjugates [FA01]	Amino fatty acids [FA0110]	LMFA01100045	2-Amino-3-hydroxypropanoic acid			MTCFGRXMJLQNBG-REOHCLBHSA-N, MTCFGRXMJLQNBG-UHFFFAOYSA-N	C3H7NO3	1	M-H	104.035		14.72	14.74	95.122	19.1446	100	100	-0.121694	0.270407	0.443835	-0.165686	0.241236	0.985013	-0.67011	0.0153431	0.765052	0.00469899	0.967324	0.838689	-0.103659	0.0940564	0.363954
TAG 60:13	TAG	RP_PosMSMS_1483		Y	GL	TG 18:2_20:5_22:6 M+Na Atlas --- TG 20:4_20:4_20:5 M+Na Atlas	Lipids and lipid-like molecules	Glycerolipids	Triradylcglycerols	HMDB0052799, HMDB0055662	TG(18:2(9Z,12Z)/20:5(5Z,8Z,11Z,14Z,17Z)/22:6(4Z,7Z,10Z,13Z,16Z,19Z)) --- TG(20:4(8Z,11Z,14Z,17Z)/20:4(8Z,11Z,14Z,17Z)/20:5(5Z,8Z,11Z,14Z,17Z))	Glycerolipids [GL]	Triradylglycerols [GL03]	Triacylglycerols [GL0301]	LMGL03012093	TG(18:2(9Z,12Z)/20:5(5Z,8Z,11Z,14Z,17Z)/22:6(4Z,7Z,10Z,13Z,16Z,19Z))[iso6]	TG 60:13	TG 18:2_20:5_22:6	GKGVYCDLFAHWTQ-WBRURSTNNA-N, WXFBMZFHVGMSBL-CWBUQHRONA-N	C63H96O6	1	M+Na	971.705		9.84	9.76	70.6989	12.8216	96.1832	100	0.121619	0.271658	0.443835	0.138659	0.328183	0.985013	0.2614	0.351324	0.765052	-0.0504775	0.660371	0.785957	0.0782274	0.208667	0.436535
Cytosine	Pyrimidines and pyrimidine derivatives	HILIC_PosMSMS_85	RT_4		nonGL	Cytosine M+H HMDB	Organoheterocyclic compounds	Diazines	Pyrimidines and pyrimidine derivatives	HMDB0000630	Cytosine								OPTASPLRGRRNAP-UHFFFAOYSA-N	C4H5N3O	1	M+H	112.05		7.17	7.18	54.3243	13.3289	95.4887	100	0.115268	0.272105	0.443835	-0.0658533	0.625107	0.993093	0.18063	0.497647	0.765052	0.0771925	0.478408	0.716738	0.03273	0.580457	0.607844
PE O-38:5	PE-O	RP_Neg, RP_PosMSMS_421, 865		Y	nonGL	PE O-16:1_22:4 M-H Atlas --- PE O-18:1_20:4 M-H Atlas, 1-(1Z-Octadecenyl)-2-(5Z,8Z,11Z,14Z-eicosatetraenoyl)-sn-glycero-3-phosphoethanolamine M+H NIST --- PE O-16:1_22:4 M+H Atlas --- PE O-18:1_20:4 M+H Atlas	Lipids and lipid-like molecules	Glycerophospholipids	Glycerophosphoethanolamines	HMDB0005779	PE(P-18:0/20:4(5Z,8Z,11Z,14Z))	Glycerophospholipids [GP]	Glycerophosphoethanolamines [GP02]	1Z-alkenyl,2-acylglycerophosphoethanolamines [GP0203]	LMGP02030003	PE(P-18:0/20:4(5Z,8Z,11Z,14Z))	PE O-38:5	PE P-18:0/20:4	OZSVECGNTALICE-GKPKDRHFNA-N, VLIJZYIABFUKFN-JZELYBSLNA-N, OZSVECGNTALICE-GKPKDRHFNA-N, URPXXNCTXCOATD-FXMFQVEGSA-N, VLIJZYIABFUKFN-JZELYBSLNA-N	C43H78NO7P	2, 1	M-H, M+H	750.5446, 752.5578	303.231	6.89	6.865	100	20.958	100	100	0.117984	0.272173	0.443835	0.116092	0.399537	0.985013	0.274731	0.312956	0.765052	0.293205	0.00748966	0.283279	0.0733758	0.224755	0.443666
HexCer 42:2;O2	HexCer	RP_NegMSMS_674		Y	nonGL	HexCer 18:1;2O/24:1 M+HCOO Atlas --- HexCer 20:2;2O/22:0 M+HCOO Atlas --- HexCer 38:2;2O/4:0 M+HCOO Atlas													PPSREVDUNDPZIG-AKTWBEBINA-N, SOKRXQYNCUAJQC-GHQHJQBONA-N, SXKXLURKFYWIIK-KSTNLYEANA-N	C48H91NO8	1	M+HCOO	854.673		7.59	7.54	61.4555	17.0669	97.7099	98.2456	-0.12074	0.272446	0.443835	-0.0983529	0.48603	0.985013	-0.298151	0.284712	0.765052	-0.072377	0.526135	0.737485	-0.0719802	0.244955	0.443666
CAR 12:0	CAR	RP_PosMSMS_88		Y	nonGL	CAR 12:0 M Atlas														C19H38NO4	1	M	344.279		1.12	1.14	65.3226	15.6364	100	100	0.122604	0.272688	0.443835	0.192613	0.177865	0.985013	0.21464	0.449069	0.765052	0.0319765	0.782975	0.809112	0.0866495	0.167718	0.408222
SM 34:1;O3	SM+O	RP_PosMSMS_771		Y	nonGL	SM 34:1;3O M+H Atlas													APEINLODEDRYLB-VLGSPTGONA-N, XIYNMXJEMPRQPO-WJTDDFOZNA-N	C39H79N2O7P	1	M+H	719.566		5.26	5.23	52.6882	16.5363	57.2519	100	0.126617	0.272876	0.443835	0.0136126	0.926896	0.998614	-0.0107334	0.970815	0.782562	-0.198484	0.0956833	0.513382	0.0422204	0.516838	0.585237
FA 3:0	FA - Fatty Acids and Conjugates	HILIC_NegMSMS_1		Y	nonGL	Propionic acid M-H FiehnHILIC	Organic acids and derivatives	Carboxylic acids and derivatives	Carboxylic acids	HMDB0000237	Propionic acid	Fatty Acyls [FA]	Fatty Acids and Conjugates [FA01]	Straight chain fatty acids [FA0101]	LMFA01010003	Propionic acid	FA 3:0		XBDQKXXYIPTUBI-UHFFFAOYSA-N	C3H6O2	1	M-H	73.0297		3.14	3.19	41.7344	17.8379	100	100	-0.121105	0.274794	0.44593	-0.159724	0.26074	0.985013	-0.512885	0.0663519	0.765052	0.148601	0.195166	0.598955	-0.0945545	0.12877	0.388039
CAR 12:2	CAR	HILIC_PosMSMS_1164		Y	nonGL	CAR 12:2 M Atlas														C19H34NO4	1	M	340.254		1.99	1.92	90.8108	8.25346	99.2481	100	0.11701	0.278303	0.450094	0.00465138	0.97324	0.998614	-0.022052	0.935893	0.774203	-0.0543978	0.627319	0.785372	0.0368863	0.544578	0.593294
PI 37:0	PI	RP_NegMS1_721		Y	nonGL	PI 10:0_27:0 M-H Atlas --- PI 11:0_26:0 M-H Atlas --- PI 12:0_25:0 M-H Atlas --- PI 13:0_24:0 M-H Atlas --- PI 14:0_23:0 M-H Atlas --- PI 15:0_22:0 M-H Atlas --- PI 16:0_21:0 M-H Atlas --- PI 17:0_20:0 M-H Atlas --- PI 18:0_19:0 M-H Atlas						Glycerophospholipids [GP]	Glycerophosphoinositols [GP06]	Diacylglycerophosphoinositols [GP0601]	LMGP06010124 --- LMGP06010166 --- LMGP06010285 --- LMGP06010937	PI(15:0/22:0) --- PI(16:0/21:0) --- PI(17:0/20:0) --- PI(18:0/19:0)	PI 37:0	PI 15:0_22:0 --- PI 16:0_21:0 --- PI 17:0_20:0 --- PI 18:0_19:0	DKKFGDDOHWEHMM-UHFFFAOYNA-N, DMHCIHNLPQMIEE-UHFFFAOYNA-N, DSOVNIFWDKUDSN-UHFFFAOYNA-N, LTQVRLDWXAUPNT-UHFFFAOYNA-N, MBLZEKZNNNPLCE-UHFFFAOYNA-N, RRICLQJDDNAOFR-UHFFFAOYNA-N, TYKFLBDWLSCVSF-UHFFFAOYNA-N, UQFBNYCSMYEKEY-UHFFFAOYNA-N, XLKDZPXJCBEKFN-UHFFFAOYNA-N	C46H89O13P	1	M-H	879.595		6.32	6.32	62.5337	23.1328	98.4733	98.2456	0.119823	0.278633	0.450094	0.125483	0.37623	0.985013	0.157796	0.574057	0.765052	-0.0571154	0.618861	0.784484	0.0699964	0.260781	0.447247
FA 6:1;O	FA - Fatty Acids and Conjugates	HILIC_NegMSMS_60		Y	nonGL	3-Methyl-2-oxovaleric acid M-H FiehnHILIC --- 4-Acetylbutyric acid M-H FiehnHILIC	Lipids and lipid-like molecules	Fatty Acyls	Fatty acids and conjugates	HMDB0061881	4-Acetylbutyrate	Fatty Acyls [FA]	Fatty Acids and Conjugates [FA01]	Oxo fatty acids [FA0106]	LMFA01060010	5-keto-n-caproic acid	FA 6:1;O		JVQYSWDUAOAHFM-UHFFFAOYNA-N, MGTZCLMLSSAXLD-UHFFFAOYSA-N	C6H10O3	1	M-H	129.056		1.81	1.81	20.5962	21.0475	46.6165	100	0.122134	0.280088	0.451234	0.0606254	0.676296	0.993093	0.0430731	0.880792	0.769105	-0.163216	0.162578	0.575938	0.0525365	0.409727	0.525251
2',2'-Difluoro-2'-deoxyuridine	Pyrimidine nucleosides	HILIC_NegMS1_468			nonGL	2',2'-Difluoro-2'-deoxyuridine; LC-ESI-ITFT; MS2; CE M-H MassBank	Nucleosides, nucleotides, and analogues	Pyrimidine nucleosides	Pyrimidine 2'-deoxyribonucleosides	HMDB0060727	2',2'-Difluorodeoxyuridine								FIRDBEQIJQERSE-QPPQHZFASA-N	C9H10F2N2O5	1	M-H	263.044		10.85	10.86	90.2439	26.6427	72.9323	100	0.119436	0.280613	0.451234	0.161424	0.25479	0.985013	0.00250962	0.992879	0.787268	0.00519334	0.963975	0.837579	0.0691443	0.26708	0.447903
Glucosamine --- D-Galactosamine	Amino acids, peptides, and analogues	HILIC_PosMS1_419			nonGL	D-(+)-Galactosamine; LC-ESI-QTOF; MS2; CE M+H MassBank --- D-(+)-Glucosamine; LC-ESI-QTOF; MS2; CE M+H MassBank --- D-Glucosamine M+H NIST --- D-Mannosamine M+H NIST --- Galactosamine M+H FiehnHILIC --- Galactosamine M+H NIST --- Glucosamine M+H HMDB --- N-Tris(hydroxymethyl)methylglycine M+H NIST --- beta-D-Glucosamine M+H HMDB	Organic oxygen compounds	Organooxygen compounds	Carbohydrates and carbohydrate conjugates	HMDB0001514, HMDB0030091, HMDB0245095	Glucosamine --- beta-D-Glucosamine --- beta-D-Galactosamine								MSWZFWKMSRAUBD-CBPJZXOFSA-N, MSWZFWKMSRAUBD-GASJEMHNSA-N, MSWZFWKMSRAUBD-IVMDWMLBSA-N, MSWZFWKMSRAUBD-QZABAPFNSA-N, MSWZFWKMSRAUBD-UHFFFAOYNA-N, MSWZFWKMSRAUBD-UHFFFAOYSA-N, MSWZFWKMSRAUBD-ZVGIEJTISA-N, SEQKRHFRPICQDD-UHFFFAOYSA-N	C6H13NO5	1	M+H	180.086		11.87	11.85	62.4324	12.3489	85.7143	100	-0.116401	0.283194	0.454351	-0.214748	0.121018	0.985013	-0.232357	0.398188	0.765052	0.273068	0.013862	0.318786	-0.0898337	0.140183	0.394605
FA 12:1;O2	FA - Fatty Acids and Conjugates	HILIC_NegMSMS_367		Y	nonGL	Dodecanedioic acid M-H HMDB	Lipids and lipid-like molecules	Fatty Acyls	Fatty acids and conjugates	HMDB0000623	Dodecanedioic acid	Fatty Acyls [FA]	Fatty Acids and Conjugates [FA01]	Dicarboxylic acids [FA0117]	LMFA01170009	Dodecanedioic acid	FA 12:1;O2		TVIDDXQYHWJXFK-UHFFFAOYSA-N	C12H22O4	1	M-H	229.144		2.61	2.64	40.9214	17.962	85.7143	100	-0.121522	0.284103	0.454369	-0.0696355	0.632598	0.993093	-0.482554	0.0917004	0.765052	0.168355	0.150967	0.560626	-0.0757905	0.235008	0.443666
PC 35:2	PC	RP_Pos, RP_NegMSMS_932, 1001, 593		Y	nonGL	PC 17:0_18:2 M+H Atlas --- PC 18:0_17:2 M+H Atlas, PC 35:2 M+Na Atlas --- PE 18:0_22:5 M+H Atlas --- PE 20:2_20:3 M+H Atlas, PC 17:0_18:2 M+HCOO Atlas	Lipids and lipid-like molecules	Glycerophospholipids	Glycerophosphoethanolamines	HMDB0009011	PE(18:0/22:5(7Z,10Z,13Z,16Z,19Z))	Glycerophospholipids [GP]	Glycerophosphocholines [GP01]	Diacylglycerophosphocholines [GP0101]	LMGP01011505 --- LMGP01011587, LMGP01011587, LMGP01011505	PC(17:0/18:2(9Z,12Z)) --- PC(18:0/17:2(9Z,12Z)), PC(18:0/17:2(9Z,12Z)), PC(17:0/18:2(9Z,12Z))	PC 35:2	PC 17:0_18:2 --- PC 17:2_18:0, PC 17:2_18:0, PC 17:0_18:2	QHSSPICKLMYIHE-RYKNKZFFNA-N, ZSKWZJYUVZYDQU-DYMXKLMANA-N, DOPWEOPNLIWONK-LTXDKZCQNA-N, GBTFQLZIZAVHPG-DYXXURTGNA-N, KYERVKWKQQBRQB-NIZIMQIGNA-N, QHSSPICKLMYIHE-RYKNKZFFNA-N, ZSKWZJYUVZYDQU-DYMXKLMANA-N	C43H82NO8P, C43H82NO8P, C45H80NO8P	1, 2	M+H, M+H --- M+Na, M+HCOO	772.5803, 794.5691, 816.5763	303.229	6.21	6.19	91.6667	15.6047	100	100	0.1198	0.28449	0.454369	-0.0774444	0.5899	0.993093	0.24797	0.382214	0.765052	-0.206325	0.0736173	0.475	0.0352537	0.576614	0.606107
18a-Glycyrrhetinic acid --- beta-Glycyrrhetinic acid	Other lipids	HILIC_PosMS1_1602	RT_1	Y	nonGL	11-Keto-.beta.-boswellic acid M+H NIST --- 18.alpha.-Glycyrrhetinic acid M+H NIST --- 18.beta.-Glycyrrhetinic acid M+H NIST --- 18a-Glycyrrhetinic acid M+H HMDB --- beta-Glycyrrhetinic acid M+H HMDB	Lipids and lipid-like molecules	Prenol lipids	Triterpenoids	HMDB0034517, HMDB0244828	beta-Glycyrrhetinic acid --- 18a-Glycyrrhetinic acid	Prenol Lipids [PR]	Isoprenoids [PR01]	C30 isoprenoids (triterpenes) [PR0106]	LMPR0106150014 --- LMPR0106150026	18alpha-Glycyrrhetinic acid --- Glycyrrhetinic acid			MPDGHEJMBKOTSU-PMTKVOBESA-N, MPDGHEJMBKOTSU-UHFFFAOYSA-N, MPDGHEJMBKOTSU-UPUJGSTDSA-N, MPDGHEJMBKOTSU-YKLVYJNSSA-N, YIMHGPSYDOGBPI-IQQSWPBXSA-N	C30H46O4	1	M+H	471.352		1.05	1.05	28.9189	22.8559	60.9023	99.1228	-0.119704	0.286094	0.455902	-0.235854	0.0994952	0.985013	-0.391303	0.167773	0.765052	-0.0511119	0.660848	0.785957	-0.102807	0.102305	0.369753
CAR 6:0	CAR	HILIC_PosMSMS_747	RT_2	Y	nonGL	CAR 6:0 M Atlas														C13H26NO4	1	M	260.187		2.84	2.85	10.8108	8.83158	27.0677	100	0.120466	0.287423	0.456991	0.0394409	0.786254	0.993093	-0.0289912	0.919715	0.769107	0.0971681	0.407918	0.69273	0.0443574	0.487234	0.572409
Phosphatidylcholine 20	Other lipids	HILIC_NegMS1_1472		Y	nonGL	Phosphatidylcholine 20 M+CH3COO MassBank													IFGVQRXZWAJKEC-BXNVUMEENA-N	C46H88NO8P, C46H90NO8P, C48H88NO8P, C50H84NO8P, C50H86NO8P, C50H88NO8P	1	M+CH3COO	888.611		6.55	6.56	13.5501	27.7565	37.594	98.2456	0.120443	0.29073	0.460072	-0.00476772	0.974027	0.998614	-0.175584	0.543877	0.765052	-0.0614816	0.603324	0.779737	0.0285717	0.656892	0.627444
CAR 10:1	CAR	RP_PosMSMS_20		Y	nonGL	CAR 10:1 M Atlas														C17H32NO4	1	M	314.232		0.5	0.5	64.2473	11.2636	100	100	0.112347	0.291214	0.460072	0.252872	0.0620919	0.985013	0.239547	0.374652	0.765052	0.115146	0.29629	0.653825	0.0962669	0.106826	0.372645
CAR 9:0	CAR	HILIC_PosMSMS_981		Y	nonGL	CAR 9:0 M Atlas														C16H32NO4	1	M	302.232		1.99	1.99	92.973	10.0979	100	100	0.114203	0.291312	0.460072	-0.00640608	0.963245	0.998614	-0.0722758	0.792564	0.76763	-0.0465826	0.678422	0.785957	0.0313807	0.607245	0.609668
TAG 56:9	TAG	RP_PosMSMS_1379, 1391		Y	GL	TG 16:0_20:4_20:5 M+NH4 Atlas, TG 16:0_18:3_22:6 M+Na Atlas --- TG 16:0_20:4_20:5 M+Na Atlas --- TG 16:1_18:2_22:6 M+Na Atlas	Lipids and lipid-like molecules	Glycerolipids	Triradylcglycerols	HMDB0044553, HMDB0044499, HMDB0048763	TG(16:0/18:3(9Z,12Z,15Z)/22:6(4Z,7Z,10Z,13Z,16Z,19Z)) --- TG(16:0/20:4(8Z,11Z,14Z,17Z)/20:5(5Z,8Z,11Z,14Z,17Z)) --- TG(16:1(9Z)/18:2(9Z,12Z)/22:6(4Z,7Z,10Z,13Z,16Z,19Z))	Glycerolipids [GL]	Triradylglycerols [GL03]	Triacylglycerols [GL0301]	LMGL03011074 --- LMGL03011075	TG(16:0/18:3(9Z,12Z,15Z)/22:6(4Z,7Z,10Z,13Z,16Z,19Z))[iso6] --- TG(16:1(9Z)/18:2(9Z,12Z)/22:6(4Z,7Z,10Z,13Z,16Z,19Z))[iso6]	TG 56:9	TG 16:0_18:3_22:6 --- TG 16:1_18:2_22:6	PHOOIXVIRZQNMT-LSEXFVLJNA-N, AWKZRMLSPPFBRT-XVRYQBSVNA-N, NPWRXJYSKONMPV-IJGJWFDLNA-N, PHOOIXVIRZQNMT-LSEXFVLJNA-N	C59H96O6	1	M+NH4, M+Na	918.747, 923.7056		10.1	10.065	67.2043	14.5149	99.2366	100	0.110524	0.294513	0.463271	0.107507	0.426564	0.985013	-0.0460679	0.863402	0.769105	-0.0621411	0.570059	0.763778	0.0535086	0.367635	0.499067
FA 22:0	FA - Fatty Acids and Conjugates	RP_NegMS1_26		Y	nonGL	Behenic acid M-H HMDB --- FA 22:0 M-H Atlas	Lipids and lipid-like molecules	Fatty Acyls	Fatty acids and conjugates	HMDB0000944	Behenic acid	Fatty Acyls [FA]	Fatty Acids and Conjugates [FA01]	Straight chain fatty acids [FA0101]	LMFA01010022	Behenic acid	FA 22:0		UKMSUNONTOPOIO-UHFFFAOYSA-N	C22H44O2	1	M-H	339.327		5.15	5.13	65.7682	27.7405	88.5496	100	-0.117634	0.29499	0.463271	-0.172745	0.229513	0.985013	-0.312476	0.271937	0.765052	0.123647	0.287812	0.653825	-0.0860702	0.172628	0.413096
Indoleacetaldehyde --- Serotonin	Indoles and derivatives	HILIC_PosMSMS_319	RT_1		nonGL	3-Acetylindole; LC-ESI-QTOF; MS2; CE M+H MassBank --- Indole-3-acetaldehyde; LC-ESI-QTOF; MS2; CE M+H MassBank --- L-Canavanine M+H-NH3 NIST --- N-Acetylindole; LC-ESI-QTOF; MS2; CE M+H MassBank --- Serotonin M+H-NH3 NIST	Organoheterocyclic compounds	Indoles and derivatives	Tryptamines and derivatives --- Indoles	HMDB0000259, HMDB0001190	Serotonin --- Indoleacetaldehyde								FSBIGDSBMBYOPN-UHFFFAOYSA-N, QZAYGJVTTNCVMB-UHFFFAOYSA-N, UUCUQJHYUPXDHN-UHFFFAOYSA-N, VUIMBZIZZFSQEE-UHFFFAOYSA-N, WHOOUMGHGSPMGR-UHFFFAOYSA-N	C10H12N2O, C10H9NO	1	M+H --- M+H-NH3	160.075		10.85	10.84	55.6757	9.12018	87.218	100	0.115656	0.295302	0.463271	0.157474	0.265776	0.985013	0.0432253	0.877598	0.769105	-0.00151431	0.989473	0.841471	0.0691948	0.265831	0.447903
FA 14:1	FA - Fatty Acids and Conjugates	HILIC_NegMS1_356	RT_1	Y	nonGL	FA 14:1 M-H Atlas	Lipids and lipid-like molecules	Fatty Acyls	Fatty acids and conjugates	HMDB0002000	Myristoleic acid	Fatty Acyls [FA]	Fatty Acids and Conjugates [FA01]	Unsaturated fatty acids [FA0103]	LMFA01030051	Myristoleic acid	FA 14:1		YWWVWXASSLXJHU-WAYWQWQTSA-N	C14H26O2	1	M-H	225.185		1.36	1.37	65.3117	16.2481	100	100	-0.116753	0.300371	0.468064	0.0126287	0.930498	0.998614	0.0783357	0.784348	0.765052	0.0573842	0.623813	0.78534	-0.0306878	0.629412	0.620316
LPI 18:2	LPI	HILIC_NegMSMS_1212		Y	nonGL	LPI 18:2 M-H Atlas	Lipids and lipid-like molecules --- NA	Glycerophospholipids --- NA	Glycerophosphoinositols --- NA	HMDB0240597, HMDB0242155	LysoPI(18:2(9Z,12Z)/0:0) --- (2R)-2-Hydroxy-3-[(hydroxy{[(1S,2R,3R,4S,5S,6R)-2,3,4,5,6-pentahydroxycyclohexyl]oxy}phosphoryl)oxy]propyl (9Z,12Z)-octadeca-9,12-dienoate	Glycerophospholipids [GP]	Glycerophosphoinositols [GP06]	Monoacylglycerophosphoinositols [GP0605]	LMGP06050010	PI(18:2(9Z,12Z)/0:0)	LPI 18:2	LPI 18:2	SAHCQBPGXQFTRA-HZJYTTRNNA-N	C27H49O12P	1	M-H	595.287		10.85	10.84	75.6098	19.3802	100	100	0.117096	0.301608	0.468064	0.0916352	0.52868	0.985013	-0.112097	0.696881	0.765052	0.163109	0.163809	0.575938	0.0492643	0.440629	0.545388
PC 35:5	PC	RP_PosMSMS_903		Y	nonGL	PC 17:2_18:3 M+H Atlas						Glycerophospholipids [GP]	Glycerophosphocholines [GP01]	Diacylglycerophosphocholines [GP0101]	LMGP01011565	PC(17:2(9Z,12Z)/18:3(9Z,12Z,15Z))	PC 35:5	PC 17:2_18:3	ISRXFUSSZHWGNX-MJXYYAAPNA-N	C43H76NO8P	1	M+H	766.536		5.17	5.16	26.0753	10.4049	58.7786	100	0.110175	0.301713	0.468064	0.0587378	0.668005	0.993093	0.215974	0.424609	0.765052	-0.153751	0.163119	0.575938	0.056923	0.343384	0.490902
2-Buten-1-ol	Alcohols and polyols	HILIC_PosMS1_1			nonGL	3-Buten-2-ol M+H-H2O NIST --- Crotyl alcohol M+H-H2O NIST	Organic oxygen compounds	Organooxygen compounds	Alcohols and polyols	HMDB0033858	2-Buten-1-ol								MKUWVMRNQOOSAT-UHFFFAOYSA-N, WCASXYBKJHWFMY-NSCUHMNNSA-N	C4H8O	1	M+H-H2O	55.054		11.61	11.62	99.7297	8.24326	99.2481	100	-0.118206	0.301724	0.468064	-0.104289	0.477514	0.985013	-0.112594	0.698391	0.765052	0.176338	0.135731	0.542199	-0.0631582	0.32709	0.482274
FA 14:1	FA - Fatty Acids and Conjugates	HILIC_NegMS1_989	RT_2	Y	nonGL	FAHFA 10:0/18:1 M-H Atlas --- FAHFA 11:0/17:1 M-H Atlas --- FAHFA 12:0/16:1 M-H Atlas --- FAHFA 13:0/15:1 M-H Atlas --- FAHFA 13:1/15:0 M-H Atlas --- FAHFA 14:0/14:1 M-H Atlas --- FAHFA 14:1/14:0 M-H Atlas --- FAHFA 15:0/13:1 M-H Atlas --- FAHFA 15:1/13:0 M-H Atlas --- FAHFA 16:1/12:0 M-H Atlas --- FAHFA 17:1/11:0 M-H Atlas --- FAHFA 18:1/10:0 M-H Atlas --- FAHFA 19:1/9:0 M-H Atlas --- FAHFA 20:1…	Lipids and lipid-like molecules	Fatty Acyls	Fatty acids and conjugates	HMDB0002000	Myristoleic acid	Fatty Acyls [FA]	Fatty Acids and Conjugates [FA01]	Unsaturated fatty acids [FA0103]	LMFA01030051	Myristoleic acid	FA 14:1		ABYKHVKKRWEJJX-QXMHVHEDSA-N, AJXKRFIULTVKCX-KHPPLWFENA-N, ANEGBHXCLDMCLB-PYCFMQQDNA-N, AXYZKXKHRVFENI-SEYXRHQNNA-N, CDYOPHYCVSTNLB-PYCFMQQDNA-N, DMILZTRWOQNQKG-KHPPLWFENA-N, DSKZOEDCZHTIRI-SEYXRHQNNA-N, HHVMXQCHFUWDEG-PYCFMQQDNA-N, IJLNYZVXCFMITO-QXMHVHEDNA-N, KOBXYJTXKIQRJS-YPKPFQOONA-N, LIMJAQUNDIERMF-YPKPFQOONA-N, LTBCABWXZMVCKB-PYCFMQQDNA-N, NDYIXJZICHORND-PYCFMQQDNA-N, NOCQTOCSXDITQV-SEYXRHQ…	C14H26O2	1	2M-H --- M-H	451.375		1.81	1.83	22.2222	13.127	61.6541	100	-0.115642	0.301907	0.468064	-0.0304961	0.832115	0.993093	-0.103259	0.716536	0.765052	0.107757	0.353228	0.669896	-0.0476337	0.450566	0.552037
PE 36:5	PE	RP_Pos, RP_NegMSMS_821, 380		Y	nonGL	PE 16:0_20:5 M+H Atlas --- PE 18:2_18:3 M+H Atlas --- PE 34:2 M+Na Atlas --- SL 19:3;O/26:7 M+H Atlas, PE 16:0_20:5 M-H Atlas	Lipids and lipid-like molecules	Glycerophospholipids	Glycerophosphoethanolamines	HMDB0008939, HMDB0009095	PE(16:0/20:5(5Z,8Z,11Z,14Z,17Z)) --- PE(18:2(9Z,12Z)/18:3(9Z,12Z,15Z))	Glycerophospholipids [GP]	Glycerophosphoethanolamines [GP02]	Diacylglycerophosphoethanolamines [GP0201]	LMGP02010665 --- LMGP02011221, LMGP02011221	PE(16:0/20:5(5Z,8Z,11Z,14Z,17Z)) --- PE(18:2(9Z,12Z)/18:3(9Z,12Z,15Z)), PE(16:0/20:5(5Z,8Z,11Z,14Z,17Z))	PE 36:5	PE 16:0_20:5 --- PE 18:2_18:3, PE 16:0_20:5	CDSZJQOSKHJRHE-QGLGPCELNA-N, KHLRCNXJXSYNCK-LPHKCNJWNA-N, MLHPDFPCOFJGHH-WKRCQCHFNA-N, ZOXULAUECYWFFP-DYXXURTGNA-N, KHLRCNXJXSYNCK-LPHKCNJWNA-N	C41H72NO8P	1	M+H --- M+Na, M-H	738.5013, 736.4924		5.515	5.47	67.4731	18.5882	33.5878	100	0.114862	0.303783	0.468064	-0.00343662	0.980888	0.998614	0.0462763	0.870397	0.769105	-0.006582	0.954746	0.835284	0.0380188	0.546094	0.593996
CAR 5:0	CAR	HILIC_PosMSMS_670	RT_2	Y	nonGL	CAR 5:0 M Atlas														C12H24NO4	2	M	246.17	85.0276	2.87	2.96	29.1892	13.6039	81.203	100	0.112972	0.303936	0.468064	-0.0913845	0.516882	0.985013	-0.466873	0.0920129	0.765052	0.0561996	0.622169	0.784484	-0.00491108	0.936889	0.698314
Indoxyl sulfate	Other organic acids and derivatives	HILIC_NegMSMS_317			nonGL	3-Indoxyl sulfate; LC-ESI-QTOF; MS2; CE M-H MassBank --- Indoxyl sulfate M-H HMDB	Organic acids and derivatives	Organic sulfuric acids and derivatives	Arylsulfates	HMDB0000682	Indoxyl sulfate								BXFFHSIDQOFMLE-UHFFFAOYSA-N	C8H7NO4S	2	M-H	212.002	132.044	7.46	7.46	52.8455	12.2294	100	100	0.114235	0.304759	0.468064	-0.22413	0.114656	0.985013	0.303294	0.281897	0.765052	-0.0543697	0.637899	0.785372	0.00789527	0.899987	0.682555
FA 18:2	FA - Fatty Acids and Conjugates	HILIC_Pos, HILIC_NegMSMS_768, 517		Y	nonGL	Conjugated linoleic Acid (10E,12Z) M+H-H2O NIST --- Conjugated linoleic acid (9E,11E) M+H-H2O NIST, Linoleic acid M-H HMDB	Lipids and lipid-like molecules	Fatty Acyls	Lineolic acids and derivatives	HMDB0003797, HMDB0005048, HMDB0000673	Linoleic acid --- Bovinic acid --- (10E,12Z)-Octadecadienoic acid	Fatty Acyls [FA]	Fatty Acids and Conjugates [FA01]	Unsaturated fatty acids [FA0103]	LMFA01030118 --- LMFA01030125, LMFA01030120	10E,12Z-octadecadienoic acid --- Rumenic acid, Linoleic acid	FA 18:2		GKJZMAHZJGSBKD-NMMTYZSQSA-N, JBYXPOFIGCOSSB-GOJKSUSPSA-N, OYHQOLUKZRVURQ-HZJYTTRNSA-N	C18H32O2	1	M+H-H2O, M-H	263.2367, 279.2324		1.315	1.325	94.0379	12.8485	100	100	-0.117332	0.305357	0.468064	-0.0912194	0.534549	0.985013	-0.2785	0.336918	0.765052	0.105638	0.373205	0.676013	-0.0685521	0.287287	0.463424
5-Acetylamino-6-amino-3-methyluracil	Organic nitrogen compounds	HILIC_NegMSMS_276			nonGL	5-Acetylamino-6-amino-3-methyluracil M-H HMDB	Organic nitrogen compounds	Organonitrogen compounds	N-arylamides	HMDB0004400	5-Acetylamino-6-amino-3-methyluracil								POQOTWQIYYNXAT-UHFFFAOYSA-N	C7H10N4O3	2	M-H	197.067	98.0335	8.52	8.54	30.8943	13.9582	85.7143	100	-0.112418	0.305512	0.468064	-0.240394	0.0856544	0.985013	-0.48012	0.0825014	0.765052	0.0799139	0.482472	0.716738	-0.105762	0.0852929	0.363249
1,5-Naphthalenediamine --- 2,3-Diaminonaphthalene	Xenobiotics	HILIC_PosMSMS_316			nonGL	1,5-Diaminonaphthalene M+H NIST --- 1,8-Diaminonaphthalene M+H NIST --- 2,3-Diaminonaphthalene M+H NIST	Benzenoids	Naphthalenes		HMDB0244231, HMDB0245385	1,5-Naphthalenediamine --- 2,3-Diaminonaphthalene								KQSABULTKYLFEV-UHFFFAOYSA-N, XTBLDMQMUSHDEN-UHFFFAOYSA-N, YFOOEYJGMMJJLS-UHFFFAOYSA-N	C10H10N2	1	M+H	159.091		10.83	10.84	100	6.82761	100	100	0.111827	0.305634	0.468064	-0.00293602	0.983292	0.998614	-0.0624214	0.821822	0.769105	0.060847	0.591147	0.773359	0.0317849	0.605683	0.609668
NAE 16:1	NAE	HILIC_PosMS1_845		Y	nonGL	Palmitoleoyl ethanolamide M+H-H2O NIST	Organic nitrogen compounds	Organonitrogen compounds	Amines	HMDB0013648	Palmitoleoylethanolamde	Fatty Acyls [FA]	Fatty amides [FA08]	N-acyl ethanolamides (endocannabinoids) [FA0804]	LMFA08040043	Palmitoleoyl-EA	NAE 16:1		WFRLANWAASSSFV-FPLPWBNLSA-N	C18H35NO2	1	M+H-H2O	280.263		1.14	1.14	87.8378	25.1896	98.4962	100	-0.114945	0.306592	0.468518	0.215517	0.13334	0.985013	-0.0182503	0.949031	0.775558	-0.045507	0.696575	0.791208	0.00429615	0.946019	0.699959
Pantothenic acid	Vitamins and cofactors	HILIC_Pos, HILIC_NegMSMS_563, 330			nonGL	D-(+)-Pantothenic acid; LC-ESI-QTOF; MS2; CE M+H MassBank --- Pantothenic acid M+H FiehnHILIC --- Pantothenic acid M+H HMDB --- Pantothenic acid M+H NIST, Pantothenic acid M-H HMDB	Organic oxygen compounds	Organooxygen compounds	Alcohols and polyols	HMDB0000210	Pantothenic acid								GHOKWGTUZJEAQD-UHFFFAOYNA-N, GHOKWGTUZJEAQD-UHFFFAOYSA-N, GHOKWGTUZJEAQD-ZETCQYMHSA-N, GHOKWGTUZJEAQD-ZETCQYMHSA-N	C9H17NO5	1	M+H, M-H	220.1177, 218.103		6.095	6.1	99.729	6.01569	100	100	-0.112392	0.307321	0.468619	-0.143383	0.309301	0.985013	-0.156407	0.575569	0.765052	0.233932	0.0386126	0.419009	-0.0710298	0.251423	0.444224
Panthenol	Alcohols and polyols	HILIC_PosMSMS_517			nonGL	Dexpanthenol M+H NIST --- Panthenol M+H FiehnHILIC --- Panthenol M+H HMDB	Lipids and lipid-like molecules	Fatty Acyls	Fatty amides	HMDB0304820	Pantothenol	Fatty Acyls [FA]	Fatty amides [FA08]	N-acyl amines [FA0802]	LMFA08020198	Pantothenol	NA 9:0;O3		SNPLKNRPJHDVJA-UHFFFAOYNA-N, SNPLKNRPJHDVJA-UHFFFAOYSA-N, SNPLKNRPJHDVJA-ZETCQYMHSA-N	C9H19NO4	1	M+H	206.138		2.67	2.68	46.4865	20.6309	96.2406	100	0.116795	0.309703	0.471235	0.279753	0.0558662	0.985013	0.211289	0.46867	0.765052	-0.27549	0.0193137	0.341462	0.101472	0.115593	0.382475
3-Methylcrotonylglycine --- Tiglylglycine	Amino acids, peptides, and analogues	HILIC_NegMSMS_150			nonGL	3-Methylcrotonylglycine M-H FiehnHILIC --- 3-Methylcrotonylglycine M-H HMDB --- N-Tigloylglycine; LC-ESI-QTOF; MS2; CE M-H MassBank --- Tiglylglycine M-H HMDB	Organic acids and derivatives	Carboxylic acids and derivatives	Amino acids, peptides, and analogues	HMDB0000459, HMDB0000959	3-Methylcrotonylglycine --- Tiglylglycine								PFWQSHXPNKRLIV-UHFFFAOYSA-N, WRUSVQOKJIDBLP-HWKANZROSA-N	C7H11NO3	1	M-H	156.066		1.88	1.85	46.3415	22.0717	93.985	100	-0.113056	0.313183	0.475509	-0.253353	0.076082	0.985013	-0.0265825	0.925593	0.769809	0.0534333	0.646003	0.785372	-0.086065	0.171671	0.413096
PG 35:0	PG	RP_NegMS1_445		Y	nonGL	PG 10:0_25:0 M-H Atlas --- PG 11:0_24:0 M-H Atlas --- PG 12:0_23:0 M-H Atlas --- PG 13:0_22:0 M-H Atlas --- PG 14:0_21:0 M-H Atlas --- PG 15:0_20:0 M-H Atlas --- PG 16:0_19:0 M-H Atlas --- PG 17:0_18:0 M-H Atlas --- PG 8:0_27:0 M-H Atlas --- PG 9:0_26:0 M-H Atlas						Glycerophospholipids [GP]	Glycerophosphoglycerols [GP04]	Diacylglycerophosphoglycerols [GP0401]	LMGP04010088 --- LMGP04010105 --- LMGP04010150 --- LMGP04010894 --- LMGP04010972	PG(13:0/22:0) --- PG(14:0/21:0) --- PG(15:0/20:0) --- PG(16:0/19:0) --- PG(17:0/18:0)	PG 35:0	PG 13:0_22:0 --- PG 14:0_21:0 --- PG 15:0_20:0 --- PG 16:0_19:0 --- PG 17:0_18:0	AKPPWFJNZYYBHE-UHFFFAOYNA-N, BAGOYPVIIVGLBF-UHFFFAOYNA-N, GLKFPORBNMRRRL-UHFFFAOYNA-N, HOOCBGMRESCWSH-UHFFFAOYNA-N, JCSBQIAIVRILDE-UHFFFAOYNA-N, RWTAVNQOBSGVEM-UHFFFAOYNA-N, SZKUUXXOFBYBCB-UHFFFAOYNA-N, XSJKEOCUSUUVLE-UHFFFAOYNA-N, ZRXJWJSUTGGARY-UHFFFAOYNA-N, ZZYYYXJLEUWJEX-UHFFFAOYNA-N	C41H81O10P	1	M-H	763.554		5.62	5.58	34.5013	20.6038	96.1832	100	-0.115415	0.314492	0.476473	-0.276103	0.0586806	0.985013	-0.319683	0.271106	0.765052	-0.260222	0.0270336	0.397529	-0.105684	0.100359	0.369753
Betaine	Amino acids, peptides, and analogues	HILIC_PosMSMS_106, 628			nonGL	Betaine M+H FiehnHILIC, Betaine 2M+H NIST	Organic acids and derivatives	Carboxylic acids and derivatives	Amino acids, peptides, and analogues	HMDB0000043	Betaine								KWIUHFFTVRNATP-UHFFFAOYSA-N	C5H12NO2	2, 1	M+H, 2M+H	118.0861, 235.1662	57.8844	10.215	10.22	58.1081	11.6646	87.9699	100	-0.110629	0.3165	0.478351	-0.153966	0.276237	0.985013	0.0465755	0.868085	0.769105	0.0300559	0.79321	0.81265	-0.0624889	0.314831	0.47664
FA 19:1	FA - Fatty Acids and Conjugates	HILIC_NegMS1_564		Y	nonGL	FA 19:1 M-H Atlas						Fatty Acyls [FA]	Fatty Acids and Conjugates [FA01]	Unsaturated fatty acids [FA0103]	LMFA01030886	19:1(9Z)	FA 19:1		YOKHLRHWEXTWJR-KHPPLWFESA-N	C19H36O2	1	M-H	295.263		1.27	1.26	50.4065	15.8774	89.4737	100	-0.112887	0.31773	0.478351	-0.0699135	0.629706	0.993093	-0.229427	0.423135	0.765052	0.0642957	0.583352	0.770169	-0.0606052	0.340754	0.488223
Cumylamine	Xenobiotics	HILIC_PosMSMS_114			nonGL	Cumylamine M+H-NH3 NIST													KDFDOINBXBEOLZ-UHFFFAOYSA-N	C9H13N	1	M+H-NH3	119.085		1.38	1.37	20	29.3853	33.8346	100	0.113608	0.317759	0.478351	0.149848	0.303524	0.985013	0.31245	0.277777	0.765052	0.171974	0.143073	0.542199	0.0803712	0.208601	0.436535
LNAPE N-34:0	LNAPE	RP_NegMSMS_347		Y	nonGL	LNAPE 16:0/N-18:0 M-H Atlas													FCMWIXDLNNYYPR-UHFFFAOYNA-N	C39H78NO8P	2	M-H	718.534	255.232	6.3	6.29	48.248	20.3006	51.9084	100	0.11488	0.318752	0.478827	-0.156041	0.290254	0.985013	-0.0928071	0.751019	0.765052	0.155784	0.190943	0.594976	0.00168362	0.979343	0.70442
CAR 20:4	CAR	RP_PosMSMS_296		Y	nonGL	CAR 20:4 M Atlas														C27H46NO4	1	M	448.341		2.54	2.53	56.7204	27.4252	68.7023	100	0.112547	0.319738	0.479027	0.157948	0.275423	0.985013	-0.0317058	0.912095	0.769107	0.0327821	0.780097	0.809112	0.0646	0.310268	0.473407
PE 38:6	PE	RP_Pos, RP_NegMSMS_896, 973, 441		Y	nonGL	2-Docosahexaenoyl-1-palmitoyl-sn-glycero-3-phosphoethanolamine M+H NIST --- PE 16:0_22:6 M+H Atlas --- PE 36:3 M+Na Atlas, PE 38:6 M+Na Atlas, PE 16:0_22:6 M-H Atlas	Lipids and lipid-like molecules	Glycerophospholipids	Glycerophosphoethanolamines	HMDB0008946	PE(16:0/22:6(4Z,7Z,10Z,13Z,16Z,19Z))	Glycerophospholipids [GP]	Glycerophosphoethanolamines [GP02]	Diacylglycerophosphoethanolamines [GP0201]	LMGP02010095	PE(16:0/22:6(4Z,7Z,10Z,13Z,16Z,19Z))	PE 38:6	PE 16:0_22:6	IYZKWIIQVVVQHL-LJURNQLPNA-N, MPWUZHVZZKSTPV-LGFBOSHVNA-N, MPWUZHVZZKSTPV-MADBQMNMSA-N, VQKORFNRWMUBAF-CWBKFRHXNA-N, MPWUZHVZZKSTPV-LGFBOSHVNA-N	C43H74NO8P	1, 2	M+H --- M+Na, M+Na, M-H	764.5191, 786.5007, 762.5092	283.239	5.73	5.71	97.5806	25.969	97.7099	100	0.109459	0.320813	0.479027	-0.093522	0.508426	0.985013	-0.0690532	0.805137	0.768914	-0.0224022	0.844829	0.822718	0.0132128	0.831804	0.665833
TAG 56:11	TAG	RP_PosMS1_1369		Y	GL	TG 10:0_16:3_30:8 M+NH4 Atlas --- TG 10:0_16:4_30:7 M+NH4 Atlas --- TG 10:0_18:4_28:7 M+NH4 Atlas --- TG 10:0_18:5_28:6 M+NH4 Atlas --- TG 10:0_20:4_26:7 M+NH4 Atlas --- TG 10:0_20:5_26:6 M+NH4 Atlas --- TG 10:0_22:5_24:6 M+NH4 Atlas --- TG 10:0_22:6_24:5 M+NH4 Atlas --- TG 12:0_16:4_28:7 M+NH4 Atlas --- TG 12:0_18:4_26:7 M+NH4 Atlas --- TG 12:0_18:5_26:6 M+NH4 Atlas --- TG 12:0_20:5_24:6 M+NH4 A…	Lipids and lipid-like molecules	Glycerolipids	Triradylcglycerols	HMDB0042869, HMDB0048320, HMDB0048342, HMDB0048961, HMDB0049003, HMDB0052767, HMDB0055312, HMDB0055318	TG(14:0/20:5(5Z,8Z,11Z,14Z,17Z)/22:6(4Z,7Z,10Z,13Z,16Z,19Z)) --- TG(14:1(9Z)/20:4(8Z,11Z,14Z,17Z)/22:6(4Z,7Z,10Z,13Z,16Z,19Z)) --- TG(14:1(9Z)/20:5(5Z,8Z,11Z,14Z,17Z)/22:5(7Z,10Z,13Z,16Z,19Z)) --- TG(16:1(9Z)/18:4(6Z,9Z,12Z,15Z)/22:6(4Z,7Z,10Z,13Z,16Z,19Z)) --- TG(16:1(9Z)/20:5(5Z,8Z,11Z,14Z,17Z)/20:5(5Z,8Z,11Z,14Z,17Z)) --- TG(18:2(9Z,12Z)/18:4(6Z,9Z,12Z,15Z)/20:5(5Z,8Z,11Z,14Z,17Z)) --- TG(18:3…	Glycerolipids [GL]	Triradylglycerols [GL03]	Triacylglycerols [GL0301]	LMGL03011019 --- LMGL03011026 --- LMGL03013671 --- LMGL03014543 --- LMGL03014948 --- LMGL03015862 --- LMGL03016316	TG(12:0/22:5(7Z,10Z,13Z,16Z,19Z)/22:6(4Z,7Z,10Z,13Z,16Z,19Z))[iso6] --- TG(14:0/20:5(5Z,8Z,11Z,14Z,17Z)/22:6(4Z,7Z,10Z,13Z,16Z,19Z))[iso6] --- TG(14:1(9Z)/20:5(5Z,8Z,11Z,14Z,17Z)/22:5(7Z,10Z,13Z,16Z,19Z))[iso6] --- TG(16:1(9Z)/18:4(6Z,9Z,12Z,15Z)/22:6(4Z,7Z,10Z,13Z,16Z,19Z))[iso6] --- TG(16:1(9Z)/20:5(5Z,8Z,11Z,14Z,17Z)/20:5(5Z,8Z,11Z,14Z,17Z))[iso3] --- TG(18:2(9Z,12Z)/18:4(6Z,9Z,12Z,15Z)/20:5(5…	TG 56:11	TG 12:0_22:5_22:6 --- TG 14:0_20:5_22:6 --- TG 14:1_20:5_22:5 --- TG 16:1_18:4_22:6 --- TG 16:1_20:5_20:5 --- TG 18:2_18:4_20:5 --- TG 18:3_18:3_20:5	ADNBNEBJYPUHCD-BSYGAHHONA-N, AEVKMKZMGCTIPL-UIOTZBHHNA-N, ALAZUESBVKNMMZ-WFBHBKQUNA-N, ALJQKGDUIBJSOW-GYQGKBJZNA-N, BAXBCLLLPCSHJJ-LLEJUKCSNA-N, BDWVZROSCVNRRG-YCJKXXQLNA-N, BFXIKDMCHQLISW-GUVXTBGONA-N, BHFCAALOWUOMKN-BVKUCFDWNA-N, BJAMSMUIYHUDMP-IXIYXLHKNA-N, BNKGSFVRZYMNJN-IYKOYMMQNA-N, DFRVVHDDSHTWQZ-ZJXZFLFCNA-N, DTDBOPVMTFCHSV-JZWKEFNONA-N, DWEMRVQVCGAAOH-MQSVNWBCNA-N, FELHIWUICIZLTM-ACJSROF…	C59H92O6	1	M+NH4	914.723		10.14	10.37	91.129	19.9105	98.4733	100	0.106774	0.320917	0.479027	0.161122	0.241834	0.985013	0.237591	0.383472	0.765052	0.00951856	0.932081	0.833368	0.0766855	0.204666	0.433229
3-Methylhistidine	Amino acids, peptides, and analogues	HILIC_PosMSMS_371			nonGL	3-Methylhistidine M+H FiehnHILIC --- 3-Methylhistidine M+H HMDB --- L-Histidine, 1-methyl- M+H NIST --- L-Histidine, 3-methyl- M+H NIST	Organic acids and derivatives	Carboxylic acids and derivatives	Amino acids, peptides, and analogues	HMDB0000479	3-Methylhistidine								BRMWTNUJHUMWMS-UHFFFAOYSA-N, JDHILDINMRGULE-LURJTMIESA-N, JDHILDINMRGULE-UHFFFAOYNA-N, JDHILDINMRGULE-UHFFFAOYSA-N	C7H11N3O2	1	M+H	170.092		16.02	16	38.3784	16.1164	100	100	0.111703	0.323494	0.481857	-0.060293	0.678001	0.993093	-0.169113	0.555715	0.765052	0.133517	0.254126	0.634176	0.0153986	0.809379	0.663503
Indole-3-carboxylic acid	Indoles and derivatives	HILIC_NegMSMS_161			nonGL	Indole-3-carboxylic acid M-H FiehnHILIC	Organoheterocyclic compounds	Indoles and derivatives	Indolecarboxylic acids and derivatives	HMDB0003320	Indole-3-carboxylic acid								KMAKOBLIOCQGJP-UHFFFAOYSA-N	C9H7NO2	2	M-H	160.04	116.049	2.84	2.89	40.9214	18.381	21.0526	100	0.107553	0.32578	0.484242	-0.2766	0.0468463	0.985013	0.111899	0.687072	0.765052	0.0547458	0.629762	0.785372	-0.0138093	0.823055	0.663503
LNAPE N-38:3	LNAPE	RP_NegMSMS_462		Y	nonGL	LNAPE 20:3/N-18:0 M-H Atlas													DFKIFYUETORPIB-JTBMWNAQNA-N	C43H80NO8P	1	M-H	768.555		6.08	6.06	41.779	28.8906	94.6565	98.2456	0.111725	0.327451	0.485706	-0.0191059	0.896231	0.997945	-0.258947	0.37039	0.765052	-0.0780439	0.509504	0.730482	0.0189225	0.768766	0.648082
Phenyl glucuronide	Carbohydrates and carbohydrate conjugates	HILIC_PosMS1_928	RT_2		nonGL	Phenyl glucuronide M+Na NIST	Organic oxygen compounds	Organooxygen compounds	Carbohydrates and carbohydrate conjugates	HMDB0060014	Phenol glucuronide								WVHAUDNUGBNUDZ-GOVZDWNOSA-N	C12H14O7	1	M+Na	293.063		12.23	12.23	61.6216	24.3551	48.8722	100	0.111524	0.328613	0.486242	-0.00288119	0.984318	0.998614	0.293717	0.309627	0.765052	0.110125	0.351742	0.669896	0.0492907	0.443489	0.546942
Phe-Met	Amino acids, peptides, and analogues	HILIC_PosMSMS_950			nonGL	Phe-Met M+H NIST	Organic acids and derivatives	Carboxylic acids and derivatives	Amino acids, peptides, and analogues	HMDB0029001	Phenylalanylmethionine								PYOHODCEOHCZBM-UHFFFAOYSA-N	C14H20N2O3S	1	M+H	297.127		9.63	9.62	57.5676	13.9078	21.0526	100	-0.109856	0.329679	0.486242	-0.143472	0.32026	0.985013	0.0201959	0.943729	0.77471	-0.0492701	0.673538	0.785957	-0.0615202	0.332195	0.482641
PI 35:6	PI	RP_PosMS1_1207		Y	nonGL	PI 35:6 M+NH4 Atlas						Glycerophospholipids [GP]	Glycerophosphoinositols [GP06]	Diacylglycerophosphoinositols [GP0601]	LMGP06010060	PI(13:0/22:6(4Z,7Z,10Z,13Z,16Z,19Z))	PI 35:6	PI 13:0_22:6	VJGZFQVAXIUBQG-ACOVZCEQNA-N	C44H73O13P	1	M+NH4	858.513		4.96	4.94	63.4409	13.7616	82.4427	100	0.111206	0.330553	0.486242	0.0948707	0.517528	0.985013	0.186565	0.519822	0.765052	0.0524918	0.658041	0.785957	0.062775	0.329193	0.482274
FA 7:1;O2 --- FA 7:2;O	FA - Fatty Acids and Conjugates --- FA - Fatty esters	HILIC_PosMS1_216		Y	nonGL	2-Ethyl-4-hydroxy-5-methyl-3(2H)-furanone M+H NIST --- 3,3-Dimethylglutaric acid M+H-H2O NIST --- 3-Acetyl-3-methyldihydrofuran-2-one M+H NIST --- 3-Methyladipic acid M+H-H2O NIST --- Pimelic acid M+H-H2O NIST	Lipids and lipid-like molecules --- Organoheterocyclic compounds	Fatty Acyls --- Dihydrofurans	Fatty acids and conjugates --- Furanones	HMDB0000857, HMDB0002441, HMDB0033736	Pimelic acid --- 3,3-Dimethylglutaric acid --- Homofureanol	Fatty Acyls [FA]	Fatty Acids and Conjugates [FA01] --- Fatty esters [FA07]	Dicarboxylic acids [FA0117] --- Lactones [FA0704]	LMFA01170051 --- LMFA01170086 --- LMFA01170095 --- LMFA07040006	3,3-dimethyl-glutaric acid --- 3-acetyl-3-methyldihydrofuran-2(3H)-one --- 3-methyl-adipic acid --- Pimelic acid	FA 7:1;O2 --- FA 7:2;O		DUHQIGLHYXLKAE-UHFFFAOYSA-N, GWCRPYGYVRXVLI-UHFFFAOYSA-N, SYEOWUNSTUDKGM-UHFFFAOYSA-N, VKDGCPFTXXDWQJ-UHFFFAOYSA-N, WLJVNTCWHIRURA-UHFFFAOYSA-N	C7H10O3, C7H12O4	1	M+H --- M+H-H2O	143.072		10.84	10.84	88.3784	8.74253	100	100	0.10727	0.330561	0.486242	0.0402184	0.77628	0.993093	-0.103214	0.712222	0.765052	0.0532828	0.641365	0.785372	0.0366599	0.555309	0.600674
N8-Acetylspermidine	Carboximidic acids and derivatives	HILIC_PosMS1_381	RT_1		nonGL	N8-Acetylspermidine M+H-NH3 NIST	Organic acids and derivatives	Carboximidic acids and derivatives	Carboximidic acids	HMDB0002189	N8-Acetylspermidine								FONIWJIDLJEJTL-UHFFFAOYSA-N	C9H21N3O	1	M+H-NH3	171.149		1.14	1.14	56.4865	4.50028	100	100	-0.109793	0.334016	0.490305	-0.198552	0.171602	0.985013	-0.530532	0.063647	0.765052	-0.00646195	0.956321	0.835284	-0.0993404	0.119088	0.382475
FA 12:4;O3	FA - Fatty Acids and Conjugates	HILIC_NegMSMS_388		Y	nonGL	CMPF M-H FiehnHILIC	Lipids and lipid-like molecules	Fatty Acyls	Fatty acids and conjugates	HMDB0061112	3-Carboxy-4-methyl-5-propyl-2-furanpropionic acid	Fatty Acyls [FA]	Fatty Acids and Conjugates [FA01]	Heterocyclic fatty acids [FA0115]	LMFA01150004	3-carboxy-4-methyl-5-propyl-2-furanpropanoic acid	FA 12:4;O3		WMCQWXZMVIETAO-UHFFFAOYSA-N	C12H16O5	1	M-H	239.092		4.54	4.71	31.4363	19.1861	86.4662	100	0.0967273	0.335098	0.490875	0.235441	0.0653338	0.985013	0.207054	0.415597	0.765052	0.198187	0.0548416	0.442848	0.086346	0.125025	0.388039
Glycine	Amino acids, peptides, and analogues	HILIC_NegMS1_2			nonGL	Glycine M-H HMDB	Organic acids and derivatives	Carboxylic acids and derivatives	Amino acids, peptides, and analogues	HMDB0000123	Glycine								DHMQDGOQFOQNFH-UHFFFAOYSA-N	C2H5NO2	1	M-H	74.025		14.35	14.73	89.4309	20.7005	100	100	-0.10673	0.337808	0.493822	-0.148399	0.297946	0.985013	-0.48988	0.0807636	0.765052	-0.0435109	0.706502	0.795815	-0.0866761	0.165656	0.408039
Isobutyrylglycine --- N-Butyrylglycine	Amino acids, peptides, and analogues	HILIC_NegMS1_106			nonGL	4-Acetamidobutyric acid M-H FiehnHILIC --- Butyrylglycine M-H FiehnHILIC --- Isobutyrylglycine M-H HMDB --- N-Butyrylglycine M-H HMDB --- N-Isobutyrylglycine M-H FiehnHILIC	Organic acids and derivatives	Carboxylic acids and derivatives	Amino acids, peptides, and analogues	HMDB0000730, HMDB0000808	Isobutyrylglycine --- N-Butyrylglycine								DCICDMMXFIELDF-UHFFFAOYSA-N, UZTFMUBKZQVKLK-UHFFFAOYSA-N, WPSSBBPLVMTKRN-UHFFFAOYSA-N	C6H11NO3	1	M-H	144.066		3.24	3.3	67.4797	21.7666	99.2481	100	-0.103923	0.342015	0.498692	-0.224442	0.107655	0.985013	-0.314886	0.255194	0.765052	0.157102	0.164372	0.575938	-0.0918283	0.134513	0.388039
FA 22:6;O	FA - Docosanoids	RP_PosMS1_51	RT_1	Y	nonGL	(+/-)-16(17)-Epoxy-4Z,7Z,10Z,13Z,19Z-docosapentaenoic acid M+H-H2O NIST --- (.+/-.)-10-Hydroxy-4Z,7Z,11E,13Z,16Z,19Z-docosahexaenoic acid M+H-H2O NIST --- (.+/-.)-11-Hydroxy-4Z,7Z,9E,13Z,16Z,19Z-docosahexaenoic acid M+H-H2O NIST --- (.+/-.)-13-Hydroxy-4Z,7Z,10Z,14E,16Z,19Z-docosahexaenoic acid M+H-H2O NIST --- (.+/-.)-14-Hydroxy-4Z,7Z,10Z,12E,16Z,19Z-docosahexaenoic acid M+H-H2O NIST --- (.+/-.)-…	Lipids and lipid-like molecules	Fatty Acyls	Fatty acids and conjugates	HMDB0010213, HMDB0013621	17-HDoHE --- 16(17)-EpDPE	Fatty Acyls [FA]	Docosanoids [FA04]		LMFA04000024 --- LMFA04000025 --- LMFA04000026 --- LMFA04000027 --- LMFA04000028 --- LMFA04000029 --- LMFA04000030 --- LMFA04000031 --- LMFA04000032 --- LMFA04000037	(+/-)-10-HDoHE --- (+/-)-11-HDoHE --- (+/-)-13-HDoHE --- (+/-)-14-HDoHE --- (+/-)-16-HDoHE --- (+/-)-17-HDoHE --- (+/-)-4-HDoHE --- (+/-)-7-HDoHE --- (+/-)-8-HDoHE --- 16(17)-EpDPE	FA 22:6;O		BCTXZWCPBLWCRV-ZYADFMMDSA-N, CSXQXWHAGLIFIH-VUARBJEWSA-N, DDCYKEYDTGCKAS-SKSHMZPZSA-N, FRQMUZJSZHZSGN-UHFFFAOYSA-N, IFRKCNPQVIJFAQ-PQVBWYSWSA-N, LTERDCBCHFKFRI-BGKMTWLOSA-N, OSXOPUBJJDUAOJ-MWEXLPNRSA-N, OXENLKNOBTVOJA-JLNKQSITSA-N, OZXAIGIRPOOJTI-XJAVJPOHSA-N, PWVSFTLICCBISU-SEQVKQOISA-N, SEVOKGDVLLIUMT-SKSHMZPZSA-N, SWTYBBUBEPPYCX-VIIQGJSXSA-N, ZHBVYDMSPDDAKE-VTIZNUJUSA-N, ZNEBXONKCYFJAF-BGKMTWL…	C22H32O3	1	M+H --- M+H-H2O	327.239		3.32	3.04	92.2043	12.9781	88.5496	100	-0.108737	0.342733	0.498692	-0.111815	0.446632	0.985013	0.0681618	0.81474	0.768914	0.0435783	0.714042	0.799097	-0.052683	0.414427	0.528319
Indole-3-carboxaldehyde	Indoles and derivatives	HILIC_PosMSMS_232	RT_3		nonGL	1H-Indole-4-carboxaldehyde M+H NIST --- 3-Formylindole; LC-ESI-QTOF; MS2; CE M+H MassBank --- Indole-3-carboxaldehyde M+H HMDB --- Indole-3-carboxyaldehyde; LC-ESI-QTOF; MS2; CE M+H MassBank	Organoheterocyclic compounds	Indoles and derivatives	Indoles	HMDB0029737	Indole-3-carboxaldehyde								JFDDFGLNZWNJTK-UHFFFAOYSA-N, OLNJUISKUQQNIM-UHFFFAOYSA-N	C9H7NO	1	M+H	146.06		10.83	10.84	100	7.20063	100	100	0.104433	0.343254	0.498692	0.00953165	0.94628	0.998614	-0.0717052	0.797651	0.768914	0.0665766	0.560185	0.755981	0.0313909	0.613373	0.612475
Saccharin	Xenobiotics	HILIC_NegMSMS_247			nonGL	Saccharin M-H HMDB	Organoheterocyclic compounds	Benzothiazoles		HMDB0029723	Saccharin								CVHZOJJKTDOEJC-UHFFFAOYSA-N	C7H5NO3S	1	M-H	181.991		6.54	6.55	63.1436	16.356	84.9624	100	-0.103745	0.345475	0.50089	-0.17652	0.209378	0.985013	-0.617947	0.0249839	0.765052	-0.165818	0.144165	0.542199	-0.0974869	0.113834	0.382475
LPC 17:0	LPC	RP_Pos, RP_NegMSMS_381, 406, 173		Y	nonGL	1-Heptadecanoyl-sn-glycero-3-phosphocholine M+H NIST --- LPC 17:0-SN1 M+H Atlas --- PC O-17:0 M+H Atlas, 1-Heptadecanoyl-sn-glycero-3-phosphocholine M+Na NIST --- LPC 17:0 M+Na Atlas, LPC 17:0 M+HCOO Atlas	Lipids and lipid-like molecules	Glycerophospholipids	Glycerophosphocholines	HMDB0012108	LysoPC(17:0/0:0)	Glycerophospholipids [GP]	Glycerophosphocholines [GP01]	Monoacylglycerophosphocholines [GP0105]	LMGP01050024	PC(17:0/0:0)	LPC 17:0	LPC 17:0	SRRQPVVYXBTRQK-UHFFFAOYNA-N, SRRQPVVYXBTRQK-XMMPIXPASA-N, UHSLTHBXDXKKEO-UHFFFAOYNA-N, SRRQPVVYXBTRQK-UHFFFAOYNA-N, SRRQPVVYXBTRQK-XMMPIXPASA-N, SRRQPVVYXBTRQK-UHFFFAOYNA-N	C25H52NO7P	1, 2	M+H, M+Na, M+HCOO	510.3535, 532.3352, 554.3463	269.247	3.1	3.1	67.7419	14.3436	100	100	-0.0968619	0.346746	0.501705	-0.0280015	0.832184	0.993093	-0.206636	0.428366	0.765052	-0.193041	0.0685048	0.468177	-0.0463073	0.424515	0.537141
[truncated: 473 more rows]
