# Supplementary material for: Global molecular landscape of early MASLD progression in human obesity
Source: eLife. 2026 Mar 23;14:RP109534. doi: 10.7554/eLife.109534 (PMC13008360; doi:10.7554/eLife.109534)
Supplement: Supplementary file 4. [file elife-109534-supp4.xlsx]

## Sheet: Liver
Compound	Class	ID	note	Lipid	Glycerolipids	name	super class (HMDB)	class (HMDB)	sub class (HMDB)	accession (HMDB)	name (HMDB)	core (LMSD)	main_class (LMSD)	sub_class (LMSD)	lm_id (LMSD)	name (LMSD)	abbrev (LMSD)	abbrev_chains (LMSD)	InChIKey	formula	MS_level	adduct	precursor_m/z	fragment_m/z	RT (library)	RT	detected_all	CoV_liver	detected_liver	nonzero_rate_liver	coef_Histo_Steatosis	pval_Histo_Steatosis	qval_Histo_Steatosis	coef_Histo_Inflammation	pval_Histo_Inflammation	qval_Histo_Inflammation	coef_Histo_Ballooning	pval_Histo_Ballooning	qval_Histo_Ballooning	coef_Histo_Fibrosis	pval_Histo_Fibrosis	qval_Histo_Fibrosis	coef_Histo_NAS	pval_Histo_NAS	qval_Histo_NAS
DAG 36:2	DAG	RP_PosMS1, MSMS_539, 565		Y	GL	1-Stearoyl-2-linoleoyl-sn-glycerol M+H NIST, DG 18:1_18:1 M+NH4 Atlas	Lipids and lipid-like molecules	Fatty Acyls --- Glycerolipids	Lineolic acids and derivatives --- Diradylglycerols	HMDB0007161, HMDB0007218, HMDB0244087	DG(18:0/18:2(9Z,12Z)/0:0) --- DG(18:1(9Z)/18:1(9Z)/0:0) --- 1,2-Dioleoyl-rac-glycerol	Glycerolipids [GL]	Diradylglycerols [GL02]	Diacylglycerols [GL0201]	LMGL02010050, LMGL02010049	DG(18:0/18:2(9Z,12Z)/0:0)[iso2], DG(18:1(9Z)/18:1(9Z)/0:0)	DG 36:2	DG 18:0_18:2, DG 18:1_18:1	AJMZUFBKADIAKC-SKTOPKGQSA-N, AFSHUZFNMVJNKX-CLFAGFIQNA-N	C39H72O5	1	M+H, M+NH4	621.5406, 638.5679		7.75	7.705	67.7419	7.72169	100	100	0.957833	2.01009e-24	1.19834e-21	0.774412	8.91692e-08	8.07036e-06	1.21074	6.73726e-06	0.000258291	0.472657	3.92854e-05	0.000548707	0.474122	5.39338e-19	1.60766e-16
DAG 34:1	DAG	RP_PosMSMS_500, 522, 528		Y	GL	1-Palmitoyl-2-oleoyl-sn-glycerol M+H NIST, DG 16:0_18:1 M+NH4 Atlas, 1-Palmitoyl-2-oleoyl-sn-glycerol M+Na NIST --- TG O-8:0_8:0_18:1 M+Na Atlas	Lipids and lipid-like molecules	Glycerolipids	Diradylglycerols	HMDB0007102, HMDB0242173	DG(16:0/18:1(9Z)/0:0) --- Diacylglycerol	Glycerolipids [GL]	Diradylglycerols [GL02]	Diacylglycerols [GL0201]	LMGL02010006	DG(16:0/18:1(9Z)/0:0)	DG 34:1	DG 16:0_18:1	YEJYLHKQOBOSCP-OZKTZCCCSA-N, YEJYLHKQOBOSCP-ZCXUNETKNA-N, BKBBVLZTZAFJSN-HNENSFHCNA-N, YEJYLHKQOBOSCP-OZKTZCCCSA-N	C37H70O5	1, 2	M+H, M+NH4, M+Na	595.5256, 612.5527, 617.5083	339.293	7.66	7.64	100	3.59484	100	100	0.954315	2.44702e-23	4.86272e-21	0.776716	1.10777e-07	8.07036e-06	1.22957	5.80584e-06	0.000254724	0.514427	7.75431e-06	0.000222629	0.474522	1.57865e-18	3.13709e-16
TAG 59:6	TAG	RP_PosMS1_1474		Y	GL	TG 10:0_11:0_38:6 M+NH4 Atlas --- TG 10:0_13:0_36:6 M+NH4 Atlas --- TG 10:0_13:1_36:5 M+NH4 Atlas --- TG 10:0_15:0_34:6 M+NH4 Atlas --- TG 10:0_15:1_34:5 M+NH4 Atlas --- TG 10:0_17:0_32:6 M+NH4 Atlas --- TG 10:0_17:1_32:5 M+NH4 Atlas --- TG 10:0_17:2_32:4 M+NH4 Atlas --- TG 10:0_19:0_30:6 M+NH4 Atlas --- TG 10:0_19:1_30:5 M+NH4 Atlas --- TG 10:0_19:2_30:4 M+NH4 Atlas --- TG 10:0_21:0_28:6 M+NH4 A…	Lipids and lipid-like molecules	Glycerolipids	Triradylcglycerols	HMDB0043132, HMDB0043363	TG(15:0/22:0/22:6(4Z,7Z,10Z,13Z,16Z,19Z)) --- TG(15:0/22:1(13Z)/22:5(7Z,10Z,13Z,16Z,19Z))	Glycerolipids [GL]	Triradylglycerols [GL03]	Triacylglycerols [GL0301]	LMGL03011279 --- LMGL03011280 --- LMGL03011324 --- LMGL03011335 --- LMGL03011344 --- LMGL03011378 --- LMGL03011379 --- LMGL03011385 --- LMGL03011435 --- LMGL03011440 --- LMGL03011479 --- LMGL03011535 --- LMGL03011542 --- LMGL03011679 --- LMGL03011687 --- LMGL03012923 --- LMGL03015340 --- LMGL03015690 --- LMGL03015697 --- LMGL03016201 --- LMGL03016337 --- LMGL03016535 --- LMGL03016564 --- LMGL0301…	TG(15:0/22:0/22:6(4Z,7Z,10Z,13Z,16Z,19Z))[iso6] --- TG(15:0/22:3(10Z,13Z,16Z)/22:3(10Z,13Z,16Z))[iso3] --- TG(15:1(9Z)/22:0/22:5(7Z,10Z,13Z,16Z,19Z))[iso6] --- TG(15:1(9Z)/22:2(13Z,16Z)/22:3(10Z,13Z,16Z))[iso6] --- TG(16:0/21:0/22:6(4Z,7Z,10Z,13Z,16Z,19Z))[iso6] --- TG(16:1(9Z)/21:0/22:5(7Z,10Z,13Z,16Z,19Z))[iso6] --- TG(17:0/20:0/22:6(4Z,7Z,10Z,13Z,16Z,19Z))[iso6] --- TG(17:0/20:1(11Z)/22:5(7Z,1…	TG 59:6	TG 15:0_22:0_22:6 --- TG 15:0_22:3_22:3 --- TG 15:1_22:0_22:5 --- TG 15:1_22:2_22:3 --- TG 16:0_21:0_22:6 --- TG 16:1_21:0_22:5 --- TG 17:0_20:0_22:6 --- TG 17:0_20:1_22:5 --- TG 17:0_20:5_22:1 --- TG 17:1_20:0_22:5 --- TG 17:1_20:2_22:3 --- TG 17:1_20:5_22:0 --- TG 17:2_20:1_22:3 --- TG 17:2_20:2_22:2 --- TG 18:0_19:0_22:6 --- TG 18:0_19:1_22:5 --- TG 18:1_19:0_22:5 --- TG 18:1_20:5_21:0 --- TG …	ABYSCRNQSDEDOZ-UIZGHKFKNA-N, ACTZOYBBDCOTMF-RRGCYIAVNA-N, ADSYTCPCLCYGNX-BAEAFIMDNA-N, AEKICJDCDBYGFL-SCXSKNBXNA-N, AGXIGFLBMGIFOZ-BTFPNSQJNA-N, AORVUYKTXIEBRE-YHPMQPPQNA-N, APLGRNNMDNLZOK-PZXPEBJFNA-N, ATDKOAVKEFUBEH-NNPJKANVNA-N, ATHPAVFEQVQTIO-WYKJHYIMNA-N, AURYFJYNFYHJQM-PDLHVDKGNA-N, AWFYVMGTPLJFET-BKIOVJSENA-N, AYRJATMEQUGRKY-USWXWGRZNA-N, BAAJAOGLDXWCJJ-BNUNXXKTNA-N, BAIZRHVSGALDTG-VEWXFON…	C62H108O6	1	M+NH4	966.848		12.01	11.95	67.4731	4.33309	100	100	0.895035	1.90341e-23	4.86272e-21	0.739902	6.11136e-08	8.07036e-06	1.18146	3.06567e-06	0.000248787	0.500147	3.09507e-06	0.000161583	0.448555	4.84999e-19	1.60766e-16
DAG 35:5	DAG	RP_PosMS1_529		Y	GL	Cer 18:3;3O/20:2;(2OH) M+H Atlas --- Cer 20:3;3O/18:2;(2OH) M+H Atlas --- Cer 22:3;3O/16:2;(2OH) M+H Atlas --- DG 11:0_24:5 M+NH4 Atlas --- DG 13:0_22:5 M+NH4 Atlas --- DG 13:1_22:4 M+NH4 Atlas --- DG 15:0_20:5 M+NH4 Atlas --- DG 15:1_20:4 M+NH4 Atlas --- DG 17:0_18:5 M+NH4 Atlas --- DG 17:1_18:4 M+NH4 Atlas --- DG 17:2_18:3 M+NH4 Atlas --- DG 19:1_16:4 M+NH4 Atlas --- DG 19:2_16:3 M+NH4 Atlas --…	Lipids and lipid-like molecules	Glycerolipids	Diradylglycerols	HMDB0007085	DG(15:0/20:5(5Z,8Z,11Z,14Z,17Z)/0:0)	Glycerolipids [GL]	Diradylglycerols [GL02]	Diacylglycerols [GL0201]	LMGL02010051 --- LMGL02010376 --- LMGL02010441	DG(13:0/22:5(7Z,10Z,13Z,16Z,19Z)/0:0)[iso2] --- DG(15:0/20:5(5Z,8Z,11Z,14Z,17Z)/0:0)[iso2] --- DG(17:2(9Z,12Z)/18:3(9Z,12Z,15Z)/0:0)[iso2]	DG 35:5	DG 13:0_22:5 --- DG 15:0_20:5 --- DG 17:2_18:3	AHFVGFDGXIBSAV-GSCXELOCNA-N, ASRLPQUWVHRWNQ-YVAAATNKNA-N, ATQOFARVZHKFEK-UJAGUTTENA-N, BPNCTANBXQESQI-IHDWIWDKNA-N, BQOIYYTYJIEWIF-TYBQXOFFNA-N, CBFSMKQPBJTXBN-GCPCFZCHNA-N, CBRHWBXPNJLUQO-UGTYNFHINA-N, CMXBBYUEFAZMLC-IEZVAYKSNA-N, DWRYUXKSLMHNCO-DBRBFSQJNA-N, FEXILKCHBLKTBA-BCXDOREHNA-N, FWEOUPBVCNEQNG-BBDKIWCZNA-N, GVFMHKNJAGKXGA-XZOQGNSINA-N, HTRAGSOEBRCVDV-JEOQIOCENA-N, JLAJSSUZJWRTIN-PZSNRTD…	C38H64O5	1	M+H --- M+NH4	618.511		7.7	7.64	100	5.85332	100	100	0.945774	5.45091e-23	8.12403e-21	0.761345	1.858e-07	8.3798e-06	1.16877	1.6685e-05	0.000429631	0.506196	1.01247e-05	0.000236514	0.466149	7.8405e-18	6.01252e-16
DAG 35:6	DAG	RP_PosMS1_527		Y	GL	DG 11:0_24:6 M+NH4 Atlas --- DG 13:0_22:6 M+NH4 Atlas --- DG 13:1_22:5 M+NH4 Atlas --- DG 15:1_20:5 M+NH4 Atlas --- DG 17:1_18:5 M+NH4 Atlas --- DG 17:2_18:4 M+NH4 Atlas --- DG 19:2_16:4 M+NH4 Atlas --- DG 9:0_26:6 M+NH4 Atlas --- NAGly 10:0/26:4 M+H Atlas --- NAGly 12:0/24:4 M+H Atlas --- NAGly 14:0/22:4 M+H Atlas --- NAGly 14:1/22:3 M+H Atlas --- NAGly 16:0/20:4 M+H Atlas --- NAGly 16:1/20:3 M+…						Glycerolipids [GL]	Diradylglycerols [GL02]	Diacylglycerols [GL0201]	LMGL02010377 --- LMGL02010465	DG(13:0/22:6(4Z,7Z,10Z,13Z,16Z,19Z)/0:0)[iso2] --- DG(15:1(9Z)/20:5(5Z,8Z,11Z,14Z,17Z)/0:0)[iso2]	DG 35:6	DG 13:0_22:6 --- DG 15:1_20:5	AAMWMMOVOHLPBF-SJCQXOIGNA-N, AHOCUILEFCCWOW-IWPNLYLCNA-N, AJFRWXQDXWVCDV-SJCQXOIGNA-N, ALGIUWNPWVCBND-KUXGPOOQNA-N, ATEHLXWMQBGQJJ-RUGMXPLONA-N, BSMMVYMCDYISRL-XWVIRPHINA-N, BXBAFPCUWPZADF-SJCQXOIGNA-N, CHGWNNHMLPHDSW-SJCQXOIGNA-N, CHNNUGCMJIJKFU-BENRWUELNA-N, CNCIBIDVDQXZJT-RLESYFSLNA-N, DEYDSZRNBDXKMI-SJCQXOIGNA-N, DSBRGELVIIKHLH-ZDMOZKBQNA-N, FKHXHRLBMNWEKS-ACOVZCEQNA-N, FNTUAQXJXCRTAY-HKZRWAB…	C38H62O5	1	M+H --- M+NH4	616.496		7.2	7.16	77.4194	5.59697	100	100	0.95316	1.13462e-22	1.35283e-20	0.758901	3.02682e-07	9.92298e-06	1.2085	1.03343e-05	0.000311031	0.451851	0.000121262	0.00116049	0.469946	1.21787e-17	8.06714e-16
DAG 36:1	DAG	RP_PosMSMS_568		Y	GL	Cer 10:0;3O/29:1;(2OH) M+H Atlas --- Cer 11:0;3O/28:1;(2OH) M+H Atlas --- Cer 12:0;3O/27:1;(2OH) M+H Atlas --- Cer 12:1;3O/27:0;(2OH) M+H Atlas --- Cer 13:0;3O/26:1;(2OH) M+H Atlas --- Cer 13:1;3O/26:0;(2OH) M+H Atlas --- Cer 14:0;3O/25:1;(2OH) M+H Atlas --- Cer 14:1;3O/25:0;(2OH) M+H Atlas --- Cer 15:0;3O/24:1;(2OH) M+H Atlas --- Cer 15:1;3O/24:0;(2OH) M+H Atlas --- Cer 16:0;3O/23:1;(2OH) M+H At…	Lipids and lipid-like molecules	Glycerolipids	Diradylglycerols	HMDB0007029, HMDB0007108, HMDB0007160, HMDB0007360, HMDB0007589	DG(14:0/22:1(13Z)/0:0) --- DG(16:0/20:1(11Z)/0:0) --- DG(18:0/18:1(9Z)/0:0) --- DG(20:0/16:1(9Z)/0:0) --- DG(22:0/14:1(9Z)/0:0)	Glycerolipids [GL]	Diradylglycerols [GL02]	Diacylglycerols [GL0201]	LMGL02010043 --- LMGL02010048	DG(16:0/20:1(11Z)/0:0)[iso2] --- DG(18:0/18:1(9Z)/0:0)[iso2]	DG 36:1	DG 16:0_20:1 --- DG 18:0_18:1	ANKVDPMNEXVLIF-BENRWUELNA-N, AOYBVRPWRVGDCD-VXPUYCOJNA-N, APWHFRSKXPFTKP-VZCXRCSSNA-N, AVLVTUWOYJTWJG-IMVLJIQENA-N, BHRHTLTUTLXTPA-OCEACIFDNA-N, BIHONAORROLAQE-HNENSFHCNA-N, BTWUKXFJGPYANY-ZCXUNETKNA-N, BVPZWAQRNNZQFV-SHHOIMCANA-N, CNDVKAGHXVWFGW-SHHOIMCANA-N, CWEITNMOQNNLPC-SHHOIMCANA-N, DPJTXFJCZAYQOX-VXPUYCOJNA-N, DSDWDISRFDQDEN-HNENSFHCNA-N, FKJACEAUWICJTD-SSZFMOIBNA-N, GMOVQHYWDKDXBB-VXPUYCO…	C39H74O5	1	M+H --- M+NH4	640.582		7.97	8.19	67.4731	11.4414	100	100	0.934723	2.77883e-22	2.07078e-20	0.772354	1.05249e-07	8.07036e-06	1.25226	3.07778e-06	0.000248787	0.467115	5.14087e-05	0.000620032	0.469363	2.53553e-18	3.77895e-16
DAG 36:6	DAG	RP_PosMS1_523		Y	GL	DG 34:3 M+Na Atlas --- Di-.gamma.-linolenin (6c,9c,12c) M+H NIST --- Dilinolenin (9c,12c,15c) M+H NIST --- TG O-10:0_8:0_16:3 M+Na Atlas --- TG O-16:3_8:0_10:0 M+Na Atlas --- TG O-18:3_8:0_8:0 M+Na Atlas --- TG O-8:0_10:0_16:3 M+Na Atlas --- TG O-8:0_8:0_18:3 M+Na Atlas	Lipids and lipid-like molecules	Fatty Acyls	Lineolic acids and derivatives	HMDB0007278, HMDB0007308	DG(18:3(6Z,9Z,12Z)/18:3(6Z,9Z,12Z)/0:0) --- DG(18:3(9Z,12Z,15Z)/18:3(9Z,12Z,15Z)/0:0)	Glycerolipids [GL]	Diradylglycerols [GL02]	Diacylglycerols [GL0201]	LMGL02010079 --- LMGL02010328	DG(18:3(6Z,9Z,12Z)/18:3(6Z,9Z,12Z)/0:0) --- DG(18:3(9Z,12Z,15Z)/18:3(9Z,12Z,15Z)/0:0)	DG 36:6	DG 18:3_18:3	CJKXNIAUCJAYKE-LJURNQLPNA-N, GGRNGZUFILJWON-NIFPDXOQNA-N, JNUVNONUAFLTRU-JUOVZTPBNA-N, JVRVKOOOXHGJKI-HUYIQXHZSA-N, RAPBJBKXYYMYAY-YTWBPVBXSA-N, RGKZYRNBNHKMQD-MOLFYXCTNA-N, WSRMJAPSRBVVIW-UFKRRDRXNA-N, YHZZZJFFXIZEGA-JUOVZTPBNA-N	C39H64O5	1	M+H --- M+Na	613.477		6.74	6.71	67.4731	10.707	99.1736	100	0.948903	2.4039e-22	2.07078e-20	0.766815	2.15722e-07	8.3798e-06	1.16159	2.43753e-05	0.000532554	0.464668	7.38454e-05	0.000805406	0.467621	2.10927e-17	1.14315e-15
TAG 57:6	TAG	RP_PosMS1_1424		Y	GL	TG 10:0_11:0_36:6 M+NH4 Atlas --- TG 10:0_13:0_34:6 M+NH4 Atlas --- TG 10:0_13:1_34:5 M+NH4 Atlas --- TG 10:0_15:0_32:6 M+NH4 Atlas --- TG 10:0_15:1_32:5 M+NH4 Atlas --- TG 10:0_17:0_30:6 M+NH4 Atlas --- TG 10:0_17:1_30:5 M+NH4 Atlas --- TG 10:0_17:2_30:4 M+NH4 Atlas --- TG 10:0_19:0_28:6 M+NH4 Atlas --- TG 10:0_19:1_28:5 M+NH4 Atlas --- TG 10:0_19:2_28:4 M+NH4 Atlas --- TG 10:0_21:0_26:6 M+NH4 A…	Lipids and lipid-like molecules	Glycerolipids	Triradylcglycerols	HMDB0043103, HMDB0043305, HMDB0043704, HMDB0043726	TG(15:0/20:0/22:6(4Z,7Z,10Z,13Z,16Z,19Z)) --- TG(15:0/20:1(11Z)/22:5(7Z,10Z,13Z,16Z,19Z)) --- TG(15:0/20:4(8Z,11Z,14Z,17Z)/22:2(13Z,16Z)) --- TG(15:0/20:5(5Z,8Z,11Z,14Z,17Z)/22:1(13Z))	Glycerolipids [GL]	Triradylglycerols [GL03]	Triacylglycerols [GL0301]	LMGL03010790 --- LMGL03010811 --- LMGL03010812 --- LMGL03010907 --- LMGL03010908 --- LMGL03010909 --- LMGL03010953 --- LMGL03010974 --- LMGL03010996 --- LMGL03010997 --- LMGL03011001 --- LMGL03011060 --- LMGL03011061 --- LMGL03011101 --- LMGL03011108 --- LMGL03011146 --- LMGL03011151 --- LMGL03012749 --- LMGL03014121 --- LMGL03014550 --- LMGL03014955 --- LMGL03015277 --- LMGL03015288 --- LMGL0301…	TG(13:0/22:0/22:6(4Z,7Z,10Z,13Z,16Z,19Z))[iso6] --- TG(13:0/22:3(10Z,13Z,16Z)/22:3(10Z,13Z,16Z))[iso3] --- TG(14:0/21:0/22:6(4Z,7Z,10Z,13Z,16Z,19Z))[iso6] --- TG(14:1(9Z)/21:0/22:5(7Z,10Z,13Z,16Z,19Z))[iso6] --- TG(15:0/20:0/22:6(4Z,7Z,10Z,13Z,16Z,19Z))[iso6] --- TG(15:0/20:1(11Z)/22:5(7Z,10Z,13Z,16Z,19Z))[iso6] --- TG(15:1(9Z)/20:0/22:5(7Z,10Z,13Z,16Z,19Z))[iso6] --- TG(15:1(9Z)/20:2(11Z,14Z)/22…	TG 57:6	TG 13:0_22:0_22:6 --- TG 13:0_22:3_22:3 --- TG 14:0_21:0_22:6 --- TG 14:1_21:0_22:5 --- TG 15:0_20:0_22:6 --- TG 15:0_20:1_22:5 --- TG 15:1_20:0_22:5 --- TG 15:1_20:2_22:3 --- TG 15:1_20:5_22:0 --- TG 16:0_19:0_22:6 --- TG 16:0_19:1_22:5 --- TG 16:1_19:0_22:5 --- TG 16:1_20:5_21:0 --- TG 17:0_18:0_22:6 --- TG 17:0_18:1_22:5 --- TG 17:0_18:3_22:3 --- TG 17:0_18:4_22:2 --- TG 17:0_20:1_20:5 --- TG …	AENLFLCMIPVZOP-VJEFUCHJNA-N, AGGPAQGYZFNSJA-LSYJYILLNA-N, AJUDOVWHNRZPLQ-VVTJGOBYNA-N, AJVWGNRCOIABJN-VQOFFUFCNA-N, ALXYPMDIGNQWGL-BAFVLRKBNA-N, ANWNELKWFBPTGV-ASHXNYRANA-N, AORWANIMKVMQRO-QMIDLTDENA-N, APRCNXIVTFFWIB-SGUAYWQRNA-N, APXPZQFXELEWCF-PAAUMLEUNA-N, ARYUKUHAWDKINO-WYKSHIOTNA-N, ASPGTJOGCUPUDC-YKLZPTNQNA-N, ASWDBPTYBBFUKO-LLEHBTHGNA-N, ATPHWMUELUKHOB-QOPFCPHQNA-N, ATRYEMIXRKYBMO-GZDLQTJ…	C60H104O6	1	M+NH4	938.817		11.68	11.69	68.8172	4.76379	100	100	0.910005	2.76349e-22	2.07078e-20	0.761569	6.72345e-08	8.07036e-06	1.16538	9.23987e-06	0.00030281	0.519611	2.60416e-06	0.000161583	0.45578	3.45724e-18	4.12214e-16
TAG 58:2	TAG	RP_PosMSMS, MS1_1464, 1473		Y	GL	TG 16:0_18:1_24:1 M+NH4 Atlas --- TG 18:0_18:2_22:0 M+NH4 Atlas --- TG 18:1_18:1_22:0 M+NH4 Atlas, TG 10:0_10:0_38:2 M+Na Atlas --- TG 10:0_12:0_36:2 M+Na Atlas --- TG 10:0_14:0_34:2 M+Na Atlas --- TG 10:0_14:1_34:1 M+Na Atlas --- TG 10:0_16:0_32:2 M+Na Atlas --- TG 10:0_16:1_32:1 M+Na Atlas --- TG 10:0_16:2_32:0 M+Na Atlas --- TG 10:0_17:2_31:0 M+Na Atlas --- TG 10:0_18:0_30:2 M+Na Atlas --- TG …	Lipids and lipid-like molecules	Glycerolipids	Triradylcglycerols	HMDB0045075, HMDB0046511, HMDB0005407, HMDB0005450, HMDB0005467, HMDB0042231, HMDB0042464, HMDB0042577, HMDB0043959, HMDB0044148, HMDB0044253, HMDB0044308, HMDB0044766, HMDB0044790, HMDB0044948, HMDB0045075, HMDB0045592, HMDB0046534, HMDB0047270, HMDB0047845, HMDB0048506	TG(18:0/20:1(11Z)/20:1(11Z)) --- TG(18:1(9Z)/20:0/20:1(11Z)) --- TG(18:2(9Z,12Z)/20:0/20:0) --- TG(14:0/22:0/22:2(13Z,16Z)) --- TG(14:0/22:1(13Z)/22:1(13Z)) --- TG(14:0/20:2n6/24:0) --- TG(16:0/20:0/22:2(13Z,16Z)) --- TG(16:0/20:1(11Z)/22:1(13Z)) --- TG(16:0/18:2(9Z,12Z)/24:0) --- TG(16:0/20:2n6/22:0) --- TG(18:0/18:0/22:2(13Z,16Z)) --- TG(18:0/20:0/20:2n6) --- TG(18:0/18:1(9Z)/22:1(13Z)) --- TG(…	Glycerolipids [GL]	Triradylglycerols [GL03]	Triacylglycerols [GL0301]	LMGL03010897 --- LMGL03010898, LMGL03010717 --- LMGL03010719 --- LMGL03010720 --- LMGL03010725 --- LMGL03010892 --- LMGL03010893 --- LMGL03010897 --- LMGL03010899 --- LMGL03010900 --- LMGL03010904 --- LMGL03010934 --- LMGL03010957 --- LMGL03010958 --- LMGL03010959 --- LMGL03010967 --- LMGL03010973 --- LMGL03010983 --- LMGL03010988 --- LMGL03011059 --- LMGL03011107 --- LMGL03013123 --- LMGL0301455…	TG(18:0/18:2(9Z,12Z)/22:0)[iso6] --- TG(18:1(9Z)/18:1(9Z)/22:0)[iso3], TG(14:0/22:0/22:2(13Z,16Z))[iso6] --- TG(15:0/21:0/22:2(13Z,16Z))[iso6] --- TG(16:0/20:0/22:2(13Z,16Z))[iso6] --- TG(16:0/20:1(11Z)/22:1(13Z))[iso6] --- TG(16:0/20:2(11Z,14Z)/22:0)[iso6] --- TG(16:1(9Z)/20:0/22:1(13Z))[iso6] --- TG(16:1(9Z)/20:1(11Z)/22:0)[iso6] --- TG(17:0/19:0/22:2(13Z,16Z))[iso6] --- TG(17:0/20:2(11Z,14Z)/2…	TG 58:2	TG 18:0_18:2_22:0 --- TG 18:1_18:1_22:0, TG 14:0_22:0_22:2 --- TG 15:0_21:0_22:2 --- TG 16:0_20:0_22:2 --- TG 16:0_20:1_22:1 --- TG 16:0_20:2_22:0 --- TG 16:1_20:0_22:1 --- TG 16:1_20:1_22:0 --- TG 17:0_19:0_22:2 --- TG 17:0_20:2_21:0 --- TG 17:1_19:0_22:1 --- TG 17:1_19:1_22:0 --- TG 17:1_20:1_21:0 --- TG 17:2_19:0_22:0 --- TG 17:2_20:0_21:0 --- TG 18:0_18:0_22:2 --- TG 18:0_18:1_22:1 --- TG 18:…	AQSCWFJEOVTYLU-AMAFFKKGNA-N, MAWRDGRSFXIWKV-VBZQPFBYNA-N, VTHDNMHRPKXWMZ-FIQXLTFTNA-N, AEJLXZDAEOYGPN-SAPUMUGNNA-N, AFFQVAIMWFYJJS-RZEXXKRKNA-N, AHOKLOMVXAXXTF-ULHGOQRHNA-N, AJCIAGRKJBJQST-YIFMJORUNA-N, AKWVODKXBRHXIL-NLHRPJCGNA-N, AKZOZLQVXBHJQL-ZPCYYFHENA-N, AOKCBLKXKQIBKY-SMTACHQSNA-N, APBNLRBTALYRHH-YEAYCDIONA-N, AREMZVRDXOGTHG-PCPMOZHJNA-N, ARSZXIDSEUCNLG-GKKPSEFHNA-N, ARWFFQAWGDUXPV-ZPAMSFT…	C61H114O6	2, 1	M+NH4, M+Na	960.8887, 965.8438	687.627	11.955	11.95	56.7204	3.34943	78.5124	100	0.889354	1.08479e-21	7.18565e-20	0.731645	1.61012e-07	8.3798e-06	1.18977	3.9277e-06	0.000254724	0.517261	1.98443e-06	0.000161583	0.445925	8.06833e-18	6.01252e-16
DAG 36:3	DAG	RP_PosMSMS_562		Y	GL	DG 18:1_18:2 M+NH4 Atlas	Lipids and lipid-like molecules	Fatty Acyls	Lineolic acids and derivatives	HMDB0007219	DG(18:1(9Z)/18:2(9Z,12Z)/0:0)	Glycerolipids [GL]	Diradylglycerols [GL02]	Diacylglycerols [GL0201]	LMGL02010056	DG(18:1(9Z)/18:2(9Z,12Z)/0:0)[iso2]	DG 36:3	DG 18:1_18:2	BLZVZPYMHLXLHG-RQOIEFAZNA-N	C39H70O5	1	M+NH4	636.553		7.32	7.29	67.7419	8.27346	100	100	0.920683	3.55906e-21	2.12177e-19	0.728855	6.80241e-07	1.71544e-05	1.16344	1.76128e-05	0.000437881	0.419604	0.000316687	0.0022947	0.452993	1.49932e-16	5.0297e-15
TAG 59:7	TAG	RP_PosMS1_1469		Y	GL	TG 10:0_11:0_38:7 M+NH4 Atlas --- TG 10:0_13:0_36:7 M+NH4 Atlas --- TG 10:0_13:1_36:6 M+NH4 Atlas --- TG 10:0_15:0_34:7 M+NH4 Atlas --- TG 10:0_15:1_34:6 M+NH4 Atlas --- TG 10:0_17:0_32:7 M+NH4 Atlas --- TG 10:0_17:1_32:6 M+NH4 Atlas --- TG 10:0_17:2_32:5 M+NH4 Atlas --- TG 10:0_19:0_30:7 M+NH4 Atlas --- TG 10:0_19:1_30:6 M+NH4 Atlas --- TG 10:0_19:2_30:5 M+NH4 Atlas --- TG 10:0_21:0_28:7 M+NH4 A…	Lipids and lipid-like molecules	Glycerolipids	Triradylcglycerols	HMDB0043364, HMDB0043566	TG(15:0/22:1(13Z)/22:6(4Z,7Z,10Z,13Z,16Z,19Z)) --- TG(15:0/22:2(13Z,16Z)/22:5(7Z,10Z,13Z,16Z,19Z))	Glycerolipids [GL]	Triradylglycerols [GL03]	Triacylglycerols [GL0301]	LMGL03011355 --- LMGL03011400 --- LMGL03011411 --- LMGL03011420 --- LMGL03011455 --- LMGL03011456 --- LMGL03011457 --- LMGL03011463 --- LMGL03011464 --- LMGL03011513 --- LMGL03011554 --- LMGL03011611 --- LMGL03011619 --- LMGL03011761 --- LMGL03012977 --- LMGL03015348 --- LMGL03015691 --- LMGL03016202 --- LMGL03016272 --- LMGL03016536 --- LMGL03016565 --- LMGL03016578 --- LMGL03016718	TG(15:0/22:2(13Z,16Z)/22:5(7Z,10Z,13Z,16Z,19Z))[iso6] --- TG(15:1(9Z)/22:0/22:6(4Z,7Z,10Z,13Z,16Z,19Z))[iso6] --- TG(15:1(9Z)/22:3(10Z,13Z,16Z)/22:3(10Z,13Z,16Z))[iso3] --- TG(16:1(9Z)/21:0/22:6(4Z,7Z,10Z,13Z,16Z,19Z))[iso6] --- TG(17:0/20:1(11Z)/22:6(4Z,7Z,10Z,13Z,16Z,19Z))[iso6] --- TG(17:0/20:2(11Z,14Z)/22:5(7Z,10Z,13Z,16Z,19Z))[iso6] --- TG(17:0/20:5(5Z,8Z,11Z,14Z,17Z)/22:2(13Z,16Z))[iso6] --…	TG 59:7	TG 15:0_22:2_22:5 --- TG 15:1_22:0_22:6 --- TG 15:1_22:3_22:3 --- TG 16:1_21:0_22:6 --- TG 17:0_20:1_22:6 --- TG 17:0_20:2_22:5 --- TG 17:0_20:5_22:2 --- TG 17:1_20:0_22:6 --- TG 17:1_20:1_22:5 --- TG 17:1_20:5_22:1 --- TG 17:2_20:0_22:5 --- TG 17:2_20:2_22:3 --- TG 17:2_20:5_22:0 --- TG 18:0_19:1_22:6 --- TG 18:1_19:0_22:6 --- TG 18:1_19:1_22:5 --- TG 18:2_19:0_22:5 --- TG 18:2_20:5_21:0 --- TG …	ABRBHTPVUSWBRU-AKKHNEAFNA-N, AFVPRALRRYUBBI-RFAWCQTKNA-N, AIKFYOWYBXQFTD-NMZCYYRMNA-N, AKIUWLNGLZXHPK-KONLYDHWNA-N, AOSJSCQVNUGRQN-VGCZWBOBNA-N, APZPPOHKYQPWOP-JIMOSURXNA-N, AQMNSNINQADNRT-XVPJWRSJNA-N, AQONSHBRRCNIST-HCLXAIBNNA-N, ATJHCMMEKZFOFJ-SIENXPGJNA-N, AZLLTOOTWCVASB-VMHZEALVNA-N, BBCYUJFEONDZJE-BRWSMADYNA-N, BBDLQHBKTKMBIX-FXLPEYFKNA-N, BFRFQMJACOBADV-LWPYWVJKNA-N, BGCFSZZWBSXGSU-YEOYFUC…	C62H106O6	1	M+NH4	964.832		11.79	11.73	67.7419	7.42525	100	100	0.856567	4.45739e-21	2.41575e-19	0.733873	5.33291e-08	8.07036e-06	1.14174	5.35617e-06	0.000254724	0.485322	4.88716e-06	0.000194278	0.434385	6.01716e-18	5.97865e-16
TAG 56:2	TAG	RP_PosMSMS_1413		Y	GL	TG 18:0_18:1_20:1 M+NH4 Atlas	Lipids and lipid-like molecules	Glycerolipids	Triradylcglycerols	HMDB0005404	TG(18:0/18:1(9Z)/20:1(11Z))	Glycerolipids [GL]	Triradylglycerols [GL03]	Triacylglycerols [GL0301]	LMGL03010434	TG(18:0/18:1(9Z)/20:1(11Z))[iso6]	TG 56:2	TG 18:0_18:1_20:1	OWMDNFFJJVRJMG-LPUXYYICNA-N	C59H110O6	1	M+NH4	932.858		11.7	11.66	74.1935	6.98291	94.2149	100	0.892069	5.79022e-21	2.87658e-19	0.734587	2.20811e-07	8.3798e-06	1.21225	3.45065e-06	0.000248787	0.493717	8.91207e-06	0.000230282	0.448414	2.0435e-17	1.14315e-15
TAG 55:2	TAG	RP_PosMSMS_1380, 1392		Y	GL	TG 18:0_18:1_19:1 M+NH4 Atlas --- TG 18:1_18:1_19:0 M+NH4 Atlas, TG 18:1_18:1_19:0 M+Na Atlas						Glycerolipids [GL]	Triradylglycerols [GL03]	Triacylglycerols [GL0301]	LMGL03010377 --- LMGL03016144, LMGL03010377	TG(18:0/18:1(9Z)/19:1(9Z))[iso6] --- TG(18:1(9Z)/18:1(9Z)/19:0)[iso3], TG(18:1(9Z)/18:1(9Z)/19:0)[iso3]	TG 55:2	TG 18:0_18:1_19:1 --- TG 18:1_18:1_19:0, TG 18:1_18:1_19:0	FLDIHXYPYWYZFS-GEADDECUNA-N, MQDWFDVGTREOKJ-MIFGFRIJNA-N, MQDWFDVGTREOKJ-MIFGFRIJNA-N	C58H108O6	2, 1	M+NH4, M+Na	918.8419, 923.7968	619.568	11.575	11.515	51.6129	6.50656	83.4711	100	0.901394	1.25483e-20	5.75446e-19	0.702788	1.33424e-06	2.91607e-05	1.10141	4.15333e-05	0.000809322	0.496326	1.12588e-05	0.000242434	0.439605	8.38472e-16	2.27211e-14
TAG 61:7	TAG	RP_PosMS1_1527		Y	GL	TG 10:0_13:0_38:7 M+NH4 Atlas --- TG 10:0_13:1_38:6 M+NH4 Atlas --- TG 10:0_15:0_36:7 M+NH4 Atlas --- TG 10:0_15:1_36:6 M+NH4 Atlas --- TG 10:0_17:0_34:7 M+NH4 Atlas --- TG 10:0_17:1_34:6 M+NH4 Atlas --- TG 10:0_17:2_34:5 M+NH4 Atlas --- TG 10:0_19:0_32:7 M+NH4 Atlas --- TG 10:0_19:1_32:6 M+NH4 Atlas --- TG 10:0_19:2_32:5 M+NH4 Atlas --- TG 10:0_21:0_30:7 M+NH4 Atlas --- TG 10:0_21:1_30:6 M+NH4 A…						Glycerolipids [GL]	Triradylglycerols [GL03]	Triacylglycerols [GL0301]	LMGL03011790 --- LMGL03011912 --- LMGL03011956 --- LMGL03011957 --- LMGL03011962 --- LMGL03011966 --- LMGL03011967 --- LMGL03011973 --- LMGL03012001 --- LMGL03012017 --- LMGL03012081 --- LMGL03012092 --- LMGL03016141 --- LMGL03016649 --- LMGL03016714 --- LMGL03016725	TG(17:0/22:1(13Z)/22:6(4Z,7Z,10Z,13Z,16Z,19Z))[iso6] --- TG(17:0/22:2(13Z,16Z)/22:5(7Z,10Z,13Z,16Z,19Z))[iso6] --- TG(17:1(9Z)/22:0/22:6(4Z,7Z,10Z,13Z,16Z,19Z))[iso6] --- TG(17:1(9Z)/22:1(13Z)/22:5(7Z,10Z,13Z,16Z,19Z))[iso6] --- TG(17:1(9Z)/22:3(10Z,13Z,16Z)/22:3(10Z,13Z,16Z))[iso3] --- TG(17:2(9Z,12Z)/22:0/22:5(7Z,10Z,13Z,16Z,19Z))[iso6] --- TG(17:2(9Z,12Z)/22:2(13Z,16Z)/22:3(10Z,13Z,16Z))[iso6]…	TG 61:7	TG 17:0_22:1_22:6 --- TG 17:0_22:2_22:5 --- TG 17:1_22:0_22:6 --- TG 17:1_22:1_22:5 --- TG 17:1_22:3_22:3 --- TG 17:2_22:0_22:5 --- TG 17:2_22:2_22:3 --- TG 18:1_21:0_22:6 --- TG 18:2_21:0_22:5 --- TG 18:4_21:0_22:3 --- TG 19:0_20:1_22:6 --- TG 19:0_20:2_22:5 --- TG 19:0_20:5_22:2 --- TG 19:1_20:0_22:6 --- TG 19:1_20:1_22:5 --- TG 20:2_20:5_21:0	ABBHQOIQGDETRA-GKSCYKEZNA-N, ABIPWJSRRKBDQO-PHJVTSRLNA-N, ACAKRUMBINKMOX-OTGVAUOANA-N, ACHZKNZKPXYGKF-LWQHXZPXNA-N, AFYJDAJTMOVFAZ-PRBLUXKINA-N, AHFLSUIBBZHODN-GAOPFFRGNA-N, AHKWCYUWPICJFH-PCIBTXFZNA-N, AJDPJFQTPOMLOY-YBPZTCPRNA-N, AKJWDEBKLKRFKI-KSUWDMFLNA-N, ALNDTFOSUWVJNH-VCKIMXBLNA-N, AMXJPWOUJZKNMH-AHYAVOPWNA-N, AQKSMROJLIALGO-YLXIJUMINA-N, AQSSYLGSVSAYCG-KFCKVWTONA-N, AUBAYVLKUXWECX-BJWGETS…	C64H110O6	1	M+NH4	992.863		12.04	11.98	66.9355	6.03689	100	100	0.852928	2.83385e-20	1.20674e-18	0.712669	1.93909e-07	8.3798e-06	1.14552	6.00609e-06	0.000254724	0.47081	1.20528e-05	0.000245347	0.429827	5.02259e-17	2.30328e-15
TAG 54:1	TAG	RP_PosMSMS_1348, 1362		Y	GL	TG 18:0_18:0_18:1 M+NH4 Atlas, TG 18:0_18:0_18:1 M+Na Atlas	Lipids and lipid-like molecules	Glycerolipids	Triradylcglycerols	HMDB0005395, HMDB0034386	TG(18:0/18:0/18:1(9Z)) --- Glycerol 1,2-dioctadecanoate 3-(9Z-octadecenoate)	Glycerolipids [GL]	Triradylglycerols [GL03]	Triacylglycerols [GL0301]	LMGL03010188	TG(18:0/18:0/18:1(9Z))[iso3]	TG 54:1	TG 18:0_18:0_18:1	YFFIQXNTTVSKJC-FVDSYPCUNA-N	C57H108O6	2, 1	M+NH4, M+Na	906.8418, 911.7978	633.586	11.68	11.63	70.6989	9.33136	89.2562	100	0.88751	1.29206e-19	4.95589e-18	0.745636	2.30049e-07	8.3798e-06	1.12871	2.57705e-05	0.000546476	0.535421	1.74728e-06	0.000161583	0.444602	2.91708e-16	8.28118e-15
TAG 59:5	TAG	RP_PosMS1_1479		Y	GL	TG 10:0_11:0_38:5 M+NH4 Atlas --- TG 10:0_13:0_36:5 M+NH4 Atlas --- TG 10:0_13:1_36:4 M+NH4 Atlas --- TG 10:0_15:0_34:5 M+NH4 Atlas --- TG 10:0_15:1_34:4 M+NH4 Atlas --- TG 10:0_17:0_32:5 M+NH4 Atlas --- TG 10:0_17:1_32:4 M+NH4 Atlas --- TG 10:0_17:2_32:3 M+NH4 Atlas --- TG 10:0_18:5_31:0 M+NH4 Atlas --- TG 10:0_19:0_30:5 M+NH4 Atlas --- TG 10:0_19:1_30:4 M+NH4 Atlas --- TG 10:0_19:2_30:3 M+NH4 A…	Lipids and lipid-like molecules	Glycerolipids	Triradylcglycerols	HMDB0043131, HMDB0043719	TG(15:0/22:0/22:5(7Z,10Z,13Z,16Z,19Z)) --- TG(15:0/20:5(5Z,8Z,11Z,14Z,17Z)/24:0)	Glycerolipids [GL]	Triradylglycerols [GL03]	Triacylglycerols [GL0301]	LMGL03011202 --- LMGL03011203 --- LMGL03011204 --- LMGL03011249 --- LMGL03011260 --- LMGL03011271 --- LMGL03011301 --- LMGL03011358 --- LMGL03011363 --- LMGL03011364 --- LMGL03011403 --- LMGL03011406 --- LMGL03011458 --- LMGL03011519 --- LMGL03011604 --- LMGL03012976 --- LMGL03013139 --- LMGL03015339 --- LMGL03015346 --- LMGL03016270 --- LMGL03016336 --- LMGL03016576 --- LMGL03016600	TG(15:0/22:0/22:5(7Z,10Z,13Z,16Z,19Z))[iso6] --- TG(15:0/22:2(13Z,16Z)/22:3(10Z,13Z,16Z))[iso6] --- TG(15:1(9Z)/22:2(13Z,16Z)/22:2(13Z,16Z))[iso3] --- TG(16:0/21:0/22:5(7Z,10Z,13Z,16Z,19Z))[iso6] --- TG(17:0/20:0/22:5(7Z,10Z,13Z,16Z,19Z))[iso6] --- TG(17:0/20:2(11Z,14Z)/22:3(10Z,13Z,16Z))[iso6] --- TG(17:0/20:5(5Z,8Z,11Z,14Z,17Z)/22:0)[iso6] --- TG(17:1(9Z)/20:1(11Z)/22:3(10Z,13Z,16Z))[iso6] --- …	TG 59:5	TG 15:0_22:0_22:5 --- TG 15:0_22:2_22:3 --- TG 15:1_22:2_22:2 --- TG 16:0_21:0_22:5 --- TG 17:0_20:0_22:5 --- TG 17:0_20:2_22:3 --- TG 17:0_20:5_22:0 --- TG 17:1_20:1_22:3 --- TG 17:1_20:2_22:2 --- TG 17:2_20:0_22:3 --- TG 17:2_20:1_22:2 --- TG 17:2_20:2_22:1 --- TG 18:0_19:0_22:5 --- TG 18:0_20:5_21:0 --- TG 18:1_19:1_22:3 --- TG 18:2_19:0_22:3 --- TG 18:2_19:1_22:2 --- TG 18:3_19:0_22:2 --- TG …	AACNUIJGPOHYEH-XLNUGGJPNA-N, AATFMBDAEWQTBC-GXYQIZPENA-N, ADLATCWUQXOESM-HBSIXKEQNA-N, AELZCTOIXUMBTR-BXLTVEKMNA-N, AIXARSARMWOXFP-HKIAUUIONA-N, AJWDWNDNKKJPFP-ZBYKPJNINA-N, AOMBAEOTHSRLGD-NJFAVMRRNA-N, AQKXJPFAGUUKFP-NTMRYDSBNA-N, AQWLJZYQRHQDMG-UTTFEHMVNA-N, ARRQDNVVNVQHKQ-IVZDAQEWNA-N, AUSDKCJHXNLCGB-HVMPLNMBNA-N, AXZCKZFKTHAHGR-IBJMWNKNNA-N, AZOLNQPZSXEPSL-DSKNMILTNA-N, BAIUYCCBKJDWIR-CSKNZAD…	C62H110O6	1	M+NH4	968.863		12.21	12.18	59.1398	7.80816	90.9091	100	0.855234	1.33008e-19	4.95589e-18	0.697401	5.86692e-07	1.53871e-05	1.21004	2.11215e-06	0.000248787	0.489618	6.67283e-06	0.000213515	0.431242	1.51863e-16	5.0297e-15
TAG 58:3	TAG	RP_PosMSMS_1459		Y	GL	TG 18:1_18:1_22:1 M+NH4 Atlas --- TG 18:1_18:2_22:0 M+NH4 Atlas	Lipids and lipid-like molecules	Glycerolipids	Triradylcglycerols	HMDB0010466, HMDB0046636	TG(18:1(9Z)/18:1(9Z)/22:1(13Z)) --- TG(22:0/18:2(9Z,12Z)/18:1(9Z))	Glycerolipids [GL]	Triradylglycerols [GL03]	Triacylglycerols [GL0301]	LMGL03010969 --- LMGL03010976	TG(18:1(9Z)/18:1(9Z)/22:1(13Z))[iso3] --- TG(18:1(9Z)/18:2(9Z,12Z)/22:0)[iso6]	TG 58:3	TG 18:1_18:1_22:1 --- TG 18:1_18:2_22:0	POBQACNRSDFLSN-LBXZNQFPNA-N, TUJAWJCRCOOMQU-KDNOBURDNA-N	C61H112O6	2	M+NH4	958.873	659.595	11.73	11.69	54.5699	6.34908	82.6446	100	0.85851	1.45918e-19	5.11709e-18	0.717655	2.78213e-07	9.60084e-06	1.15729	7.25372e-06	0.000261492	0.512141	2.4168e-06	0.000161583	0.432924	1.61769e-16	5.07581e-15
TAG 56:1	TAG	RP_PosMSMS_1416		Y	GL	TG 16:0_18:1_22:0 M+NH4 Atlas --- TG 18:0_18:1_20:0 M+NH4 Atlas	Lipids and lipid-like molecules	Glycerolipids	Triradylcglycerols	HMDB0005402, HMDB0031143, HMDB0044112	TG(18:0/18:1(9Z)/20:0) --- Glycerol 1-eicosanoate 2-(9Z-octadecenoate) 3-octadecanoate --- TG(16:0/18:1(9Z)/22:0)	Glycerolipids [GL]	Triradylglycerols [GL03]	Triacylglycerols [GL0301]	LMGL03010382 --- LMGL03010511	TG(16:0/18:1(9Z)/22:0)[iso6] --- TG(18:0/18:1(9Z)/20:0)[iso6]	TG 56:1	TG 16:0_18:1_22:0 --- TG 18:0_18:1_20:0	IFLOLSWWIHPMFV-ZXPTYKNPNA-N, OCYFAHIHWCVZKS-QVTSOHHYNA-N	C59H112O6	2	M+NH4	934.873	661.617	11.94	11.92	50	9.96018	68.595	100	0.870474	5.41494e-19	1.79343e-17	0.739398	2.27832e-07	8.3798e-06	1.23367	2.66439e-06	0.000248787	0.47512	2.43876e-05	0.000384746	0.444223	1.29433e-16	5.01433e-15
TAG 60:2	TAG	RP_PosMSMS_1517		Y	GL	TG 18:1_18:1_24:0 M+NH4 Atlas	Lipids and lipid-like molecules	Glycerolipids	Triradylcglycerols	HMDB0047249	TG(24:0/18:1(9Z)/18:1(9Z))								OZGHAUBMNCOWIH-NNBGLWHGNA-N	C63H118O6	1	M+NH4	988.92		12.22	12.21	53.7634	5.86118	74.3802	100	0.857299	8.91523e-19	2.65745e-17	0.741155	1.44569e-07	8.3798e-06	1.21926	2.68909e-06	0.000248787	0.493106	8.37636e-06	0.000227831	0.439997	1.06558e-16	4.53753e-15
TAG 61:5	TAG	RP_PosMS1_1535		Y	GL	TG 10:0_13:0_38:5 M+NH4 Atlas --- TG 10:0_13:1_38:4 M+NH4 Atlas --- TG 10:0_15:0_36:5 M+NH4 Atlas --- TG 10:0_15:1_36:4 M+NH4 Atlas --- TG 10:0_17:0_34:5 M+NH4 Atlas --- TG 10:0_17:1_34:4 M+NH4 Atlas --- TG 10:0_17:2_34:3 M+NH4 Atlas --- TG 10:0_18:5_33:0 M+NH4 Atlas --- TG 10:0_19:0_32:5 M+NH4 Atlas --- TG 10:0_19:1_32:4 M+NH4 Atlas --- TG 10:0_19:2_32:3 M+NH4 Atlas --- TG 10:0_20:5_31:0 M+NH4 A…	Lipids and lipid-like molecules	Glycerolipids	Triradylcglycerols	HMDB0043748	TG(15:0/22:5(7Z,10Z,13Z,16Z,19Z)/24:0)	Glycerolipids [GL]	Triradylglycerols [GL03]	Triacylglycerols [GL0301]	LMGL03011721 --- LMGL03011722 --- LMGL03011727 --- LMGL03011774 --- LMGL03011779 --- LMGL03011822 --- LMGL03011829 --- LMGL03011862 --- LMGL03011869 --- LMGL03011933 --- LMGL03011958 --- LMGL03012000 --- LMGL03015979 --- LMGL03016723 --- LMGL03016733	TG(17:0/22:0/22:5(7Z,10Z,13Z,16Z,19Z))[iso6] --- TG(17:0/22:2(13Z,16Z)/22:3(10Z,13Z,16Z))[iso6] --- TG(17:1(9Z)/22:1(13Z)/22:3(10Z,13Z,16Z))[iso6] --- TG(17:1(9Z)/22:2(13Z,16Z)/22:2(13Z,16Z))[iso3] --- TG(17:2(9Z,12Z)/22:0/22:3(10Z,13Z,16Z))[iso6] --- TG(17:2(9Z,12Z)/22:1(13Z)/22:2(13Z,16Z))[iso6] --- TG(18:0/21:0/22:5(7Z,10Z,13Z,16Z,19Z))[iso6] --- TG(18:2(9Z,12Z)/21:0/22:3(10Z,13Z,16Z))[iso6] -…	TG 61:5	TG 17:0_22:0_22:5 --- TG 17:0_22:2_22:3 --- TG 17:1_22:1_22:3 --- TG 17:1_22:2_22:2 --- TG 17:2_22:0_22:3 --- TG 17:2_22:1_22:2 --- TG 18:0_21:0_22:5 --- TG 18:2_21:0_22:3 --- TG 18:3_21:0_22:2 --- TG 19:0_20:0_22:5 --- TG 19:0_20:2_22:3 --- TG 19:0_20:5_22:0 --- TG 19:1_20:1_22:3 --- TG 19:1_20:2_22:2 --- TG 20:0_20:5_21:0	AHGCCUPYMHFLNE-DECNVBCVNA-N, AJFIGFCJUKLJGZ-APRPQARHNA-N, ALMCLWDOXBXDHM-MTLGXYTQNA-N, AMPRRZMQTYYOFM-DVFZJWTONA-N, AOTUTFKKMIVSQX-OETNGVFGNA-N, AQAUPAGVBDPMDF-UEEJUZCONA-N, ASEVQEPNSDVOAV-JOLZRBAKNA-N, ASRCGRHOEJRCRP-HOXCXTPVNA-N, ATCPZUPMYYDCEZ-UNJQRGLKNA-N, ATXSOVJXMGCNNO-OHBWSINCNA-N, AUGAOXGSZXTZKU-DUFJGDSJNA-N, AUSHQPXGWZDSJC-LFSVJLMBNA-N, AVXLFTUEJRIPJB-YMFPVCFNNA-N, AYKAKJXTYVPUCZ-RBRKGID…	C64H114O6	1	M+NH4	996.894		12.39	12.37	56.9892	12.2392	93.3884	100	0.848713	8.48266e-19	2.65745e-17	0.770294	2.47882e-08	8.07036e-06	1.19672	3.32388e-06	0.000248787	0.49529	5.88432e-06	0.000213515	0.441453	2.36345e-17	1.17416e-15
TAG 60:3	TAG	RP_PosMSMS_1513		Y	GL	TG 18:1_18:1_24:1 M+NH4 Atlas --- TG 18:1_18:2_24:0 M+NH4 Atlas	Lipids and lipid-like molecules	Glycerolipids	Triradylcglycerols	HMDB0047369	TG(24:0/18:2(9Z,12Z)/18:1(9Z))								MDAOMPFQZJLFBG-MSKHGBNANA-N, QGHHAKZNDRIPKE-ZRDYYRANNA-N	C63H116O6	1	M+NH4	986.904		11.97	11.98	52.1505	6.61279	71.9008	100	0.857509	9.79666e-19	2.78113e-17	0.721272	3.60327e-07	1.07771e-05	1.22094	2.66161e-06	0.000248787	0.485283	1.23436e-05	0.000245347	0.436659	2.61052e-16	7.78145e-15
TAG 54:2	TAG	RP_PosMSMS_1344, 1358		Y	GL	TG 18:0_18:1_18:1 M+NH4 Atlas, TG 18:0_18:1_18:1 M+Na Atlas	Lipids and lipid-like molecules	Glycerolipids	Triradylcglycerols	HMDB0005403, HMDB0031144	TG(18:0/18:1(9Z)/18:1(9Z)) --- Glycerol 1,2-di-(9Z-octadecenoate) 3-octadecanoate	Glycerolipids [GL]	Triradylglycerols [GL03]	Triacylglycerols [GL0301]	LMGL03010217	TG(18:0/18:1(9Z)/18:1(9Z))[iso3]	TG 54:2	TG 18:0_18:1_18:1	RYNHWWNZNIGDAQ-CDAVXRBQNA-N	C57H106O6	2, 1	M+NH4, M+Na	904.8267, 909.782	265.249	11.42	11.4	93.8172	2.52391	97.5207	100	0.870047	1.22754e-18	3.32641e-17	0.702581	1.26786e-06	2.86654e-05	1.02717	0.000141167	0.00199568	0.470051	3.41967e-05	0.000504926	0.426655	1.08307e-14	2.32147e-13
TAG 53:1	TAG	RP_PosMSMS_1318, 1329		Y	GL	TG 17:0_18:0_18:1 M+NH4 Atlas, TG 17:0_18:0_18:1 M+Na Atlas						Glycerolipids [GL]	Triradylglycerols [GL03]	Triacylglycerols [GL0301]	LMGL03010119	TG(17:0/18:0/18:1(9Z))[iso6]	TG 53:1	TG 17:0_18:0_18:1	CTYHEFNQFHZLTL-FVDSYPCUNA-N	C56H106O6	2, 1	M+NH4, M+Na	892.826, 897.7812	605.551	11.53	11.515	57.2581	9.13524	87.6033	100	0.876602	1.37878e-18	3.57379e-17	0.666084	6.29233e-06	0.000100627	1.07954	6.84244e-05	0.00120324	0.484181	2.21573e-05	0.000381686	0.424915	3.13752e-14	6.23489e-13
TAG 53:3	TAG	RP_PosMSMS_1302		Y	GL	TG 17:0_18:1_18:2 M+NH4 Atlas --- TG 17:1_18:1_18:1 M+NH4 Atlas						Glycerolipids [GL]	Triradylglycerols [GL03]	Triacylglycerols [GL0301]	LMGL03010161 --- LMGL03010164	TG(17:0/18:1(9Z)/18:2(9Z,12Z))[iso6] --- TG(17:1(9Z)/18:1(9Z)/18:1(9Z))[iso3]	TG 53:3	TG 17:0_18:1_18:2 --- TG 17:1_18:1_18:1	NIBMDPFMDDQNNX-KYDHCSDMNA-N, ZNQBEJJYVJSZLM-NRRKBIGSNA-N	C56H102O6	1	M+NH4	888.795		11	10.99	86.0215	5.41184	94.2149	100	0.884134	1.46563e-18	3.64062e-17	0.650168	1.35421e-05	0.000184982	0.99432	0.00031139	0.0037418	0.454102	9.09675e-05	0.00092178	0.419742	1.71324e-13	2.76045e-12
DAG 34:2	DAG	RP_PosMSMS_518		Y	GL	DG 16:0_18:2 M+NH4 Atlas	Lipids and lipid-like molecules	Fatty Acyls	Lineolic acids and derivatives	HMDB0007103, HMDB0251102	DG(16:0/18:2(9Z,12Z)/0:0) --- 1-O-Palmitoyl-2-O-linoleoyl-D-glycerol	Glycerolipids [GL]	Diradylglycerols [GL02]	Diacylglycerols [GL0201]	LMGL02010027	DG(16:0/18:2(9Z,12Z)/0:0)[iso2]	DG 34:2	DG 16:0_18:2	SVXWJFFKLMLOHO-BCTRXSSUNA-N	C37H68O5	2	M+NH4	610.537	313.272	7.16	7.16	66.3978	8.99085	100	100	0.890728	2.27749e-18	5.431e-17	0.709223	2.13216e-06	4.14417e-05	1.18534	1.57042e-05	0.000419351	0.432518	0.000244658	0.00197556	0.44215	5.71176e-15	1.36205e-13
TAG 61:6	TAG	RP_PosMS1_1531		Y	GL	TG 10:0_13:0_38:6 M+NH4 Atlas --- TG 10:0_13:1_38:5 M+NH4 Atlas --- TG 10:0_15:0_36:6 M+NH4 Atlas --- TG 10:0_15:1_36:5 M+NH4 Atlas --- TG 10:0_17:0_34:6 M+NH4 Atlas --- TG 10:0_17:1_34:5 M+NH4 Atlas --- TG 10:0_17:2_34:4 M+NH4 Atlas --- TG 10:0_19:0_32:6 M+NH4 Atlas --- TG 10:0_19:1_32:5 M+NH4 Atlas --- TG 10:0_19:2_32:4 M+NH4 Atlas --- TG 10:0_21:0_30:6 M+NH4 Atlas --- TG 10:0_21:1_30:5 M+NH4 A…	Lipids and lipid-like molecules	Glycerolipids	Triradylcglycerols	HMDB0043777	TG(15:0/22:6(4Z,7Z,10Z,13Z,16Z,19Z)/24:0)	Glycerolipids [GL]	Triradylglycerols [GL03]	Triacylglycerols [GL0301]	LMGL03011720 --- LMGL03011791 --- LMGL03011844 --- LMGL03011855 --- LMGL03011890 --- LMGL03011891 --- LMGL03011897 --- LMGL03011901 --- LMGL03011908 --- LMGL03011928 --- LMGL03011996 --- LMGL03012021 --- LMGL03012032 --- LMGL03016062 --- LMGL03016648 --- LMGL03016713 --- LMGL03016734 --- LMGL03016758	TG(17:0/22:0/22:6(4Z,7Z,10Z,13Z,16Z,19Z))[iso6] --- TG(17:0/22:1(13Z)/22:5(7Z,10Z,13Z,16Z,19Z))[iso6] --- TG(17:0/22:3(10Z,13Z,16Z)/22:3(10Z,13Z,16Z))[iso3] --- TG(17:1(9Z)/22:0/22:5(7Z,10Z,13Z,16Z,19Z))[iso6] --- TG(17:1(9Z)/22:2(13Z,16Z)/22:3(10Z,13Z,16Z))[iso6] --- TG(17:2(9Z,12Z)/22:1(13Z)/22:3(10Z,13Z,16Z))[iso6] --- TG(17:2(9Z,12Z)/22:2(13Z,16Z)/22:2(13Z,16Z))[iso3] --- TG(18:0/21:0/22:6(4Z…	TG 61:6	TG 17:0_22:0_22:6 --- TG 17:0_22:1_22:5 --- TG 17:0_22:3_22:3 --- TG 17:1_22:0_22:5 --- TG 17:1_22:2_22:3 --- TG 17:2_22:1_22:3 --- TG 17:2_22:2_22:2 --- TG 18:0_21:0_22:6 --- TG 18:1_21:0_22:5 --- TG 18:3_21:0_22:3 --- TG 18:4_21:0_22:2 --- TG 19:0_20:0_22:6 --- TG 19:0_20:1_22:5 --- TG 19:0_20:5_22:1 --- TG 19:1_20:0_22:5 --- TG 19:1_20:2_22:3 --- TG 19:1_20:5_22:0 --- TG 20:1_20:5_21:0	ABDWFJAVZLVJCV-XGJYAVPSNA-N, ACQVTLBYTPWPQM-DXNNEYAONA-N, AEHFUZWVAKBISK-QHPXFDACNA-N, AEJSHIKLOVBVDB-LSYJYILLNA-N, AFOPVHQTORRFSI-ZYJGALPFNA-N, AJMKJUMUDNSNAK-KVDLIKLXNA-N, AJRDNYWRANQDLP-UERMBPGQNA-N, ALWTUZZRQWWZMC-NBGHCZFUNA-N, ANERYYPEFQHQLC-VCNAFCDVNA-N, ANWOISFNFMVXHA-HYIVDKTLNA-N, ARTVPFANQHOOBK-VJEFUCHJNA-N, AULREUVYAVFSKG-ULERDAIYNA-N, AVSANCSYPWUUFT-USWKLIDSNA-N, AWDDPCUICBWASR-FRNOTRN…	C64H112O6	1	M+NH4	994.878		12.24	12.21	65.3226	7.33128	99.1736	100	0.835427	2.39017e-18	5.48047e-17	0.742172	7.40482e-08	8.07036e-06	1.16798	5.05881e-06	0.000254724	0.501804	3.52961e-06	0.000161583	0.431193	1.34577e-16	5.01433e-15
FA 21:2;O2	FA - Eicosanoids	RP_PosMSMS_71		Y	nonGL	Prostaglandin F2.alpha. alcohol methyl ether M+H-H2O NIST						Fatty Acyls [FA]	Eicosanoids [FA03]	Prostaglandins [FA0301]	LMFA03010073	PGF2alpha methyl ether	FA 21:2;O2		VWEVSUSNDAHANL-GPPPFWBLSA-N	C21H38O4	1	M+H-H2O	337.273		7.22	7.16	78.4946	4.19132	100	100	0.882223	3.01087e-18	6.648e-17	0.656738	1.1735e-05	0.000163708	1.08481	7.88919e-05	0.00135429	0.376317	0.00144719	0.00705557	0.425163	8.36909e-14	1.46745e-12
TAG O-60:8	TAG-O	RP_PosMS1_1476		Y	GL	TG O-16:0_22:2_22:6 M+Na Atlas --- TG O-16:0_22:3_22:5 M+Na Atlas --- TG O-16:0_22:4_22:4 M+Na Atlas --- TG O-16:1_22:1_22:6 M+Na Atlas --- TG O-16:1_22:2_22:5 M+Na Atlas --- TG O-16:1_22:3_22:4 M+Na Atlas --- TG O-16:2_22:0_22:6 M+Na Atlas --- TG O-16:2_22:1_22:5 M+Na Atlas --- TG O-16:2_22:2_22:4 M+Na Atlas --- TG O-16:2_22:3_22:3 M+Na Atlas --- TG O-16:3_22:0_22:5 M+Na Atlas --- TG O-16:3_22:1…	Lipids and lipid-like molecules	Glycerolipids	Triradylcglycerols	HMDB0055928	TG(22:6(4Z,7Z,10Z,13Z,16Z,19Z)/20:2n6/O-18:0)								ADOVINVLNMGPCA-BBVSQTKQNA-N, AGJXCDRWZNJPRJ-SIOAFNFSNA-N, AOSIEGZBZCSNAE-ALMBGZEPNA-N, AQGPGCGZHVKPMT-NQBJMNHBNA-N, ARQAVKPKADGPAG-RHXJYLCGNA-N, BBAOQCSGVDSRON-YZPIHWQENA-N, BIQXTBQHRDZZBK-VLRVIMMINA-N, BIVIXVDDHSYUIR-QAYKVYIWNA-N, BKTPHCOXTPSXTK-HWYYOFFJNA-N, BNAQIINGZFAHTN-KLGWTQLBNA-N, BUBLFFRWGTWHOT-WGSMUPIHNA-N, CENNWGJTXGVPPD-PRCNTBHLNA-N, CGTVOXPJKNFERZ-VNBMKEFBNA-N, CLTWRJKKGHRSBZ-UDFHZAQ…	C63H108O5	1	M+Na	967.803		11.85	11.82	54.5699	28.4035	60.3306	100	0.827239	7.28764e-18	1.55164e-16	0.707188	3.61608e-07	1.07771e-05	1.06579	3.75444e-05	0.000751917	0.541804	4.0299e-07	0.000137461	0.417278	3.18619e-15	7.91448e-14
TAG 52:4	TAG	RP_PosMSMS_1261, 1272		Y	GL	TG 16:0_18:2_18:2 M+NH4 Atlas --- TG 16:1_18:1_18:2 M+NH4 Atlas, TG 16:0_16:0_20:4 M+Na Atlas --- TG 16:0_18:2_18:2 M+Na Atlas --- TG 16:1_18:1_18:2 M+Na Atlas	Lipids and lipid-like molecules	Glycerolipids	Triradylcglycerols	HMDB0005390, HMDB0005440, HMDB0031117, HMDB0043908	TG(16:0/18:2(9Z,12Z)/18:2(9Z,12Z)) --- TG(16:1(9Z)/18:1(9Z)/18:2(9Z,12Z)) --- Glycerol 1,2-di-(9Z,12Z-octadecadienoate) 3-hexadecanoate --- TG(16:0/16:0/20:4(8Z,11Z,14Z,17Z))	Glycerolipids [GL]	Triradylglycerols [GL03]	Triacylglycerols [GL0301]	LMGL03010141 --- LMGL03010142	TG(16:0/18:2(9Z,12Z)/18:2(9Z,12Z))[iso3] --- TG(16:1(9Z)/18:1(9Z)/18:2(9Z,12Z))[iso6]	TG 52:4	TG 16:0_18:2_18:2 --- TG 16:1_18:1_18:2	LXAWUIOWWNQCQA-YBQWMRSQNA-N, WHSWXEYWNPTUPW-KPJCRDJJNA-N, GTEUKLVYQXBQGG-OWRUCQERNA-N, LXAWUIOWWNQCQA-YBQWMRSQNA-N, WHSWXEYWNPTUPW-KPJCRDJJNA-N	C55H98O6	2, 1	M+NH4, M+Na	872.7645, 877.7198	337.27	10.61	10.57	97.8495	2.71094	99.1736	100	0.875467	7.98296e-18	1.64108e-16	0.642561	1.91125e-05	0.000232658	0.982409	0.000394746	0.00444698	0.422942	0.000309843	0.0022947	0.415296	5.1384e-13	7.2936e-12
TAG 58:1	TAG	RP_PosMSMS_1467		Y	GL	TG 16:0_18:1_24:0 M+NH4 Atlas	Lipids and lipid-like molecules	Glycerolipids	Triradylcglycerols	HMDB0044113	TG(16:0/18:1(9Z)/24:0)								DFSTYDOPXLRTDY-MKFPQRGTNA-N	C61H116O6	1	M+NH4	962.904		12.19	12.14	55.3763	4.28869	75.2066	100	0.848935	1.04146e-17	2.0696e-16	0.72436	4.21452e-07	1.15139e-05	1.20031	5.18532e-06	0.000254724	0.502994	6.68698e-06	0.000213515	0.433651	1.30044e-15	3.37073e-14
TAG 50:4	TAG	RP_PosMSMS_1167		Y	GL	TG 16:1_16:1_18:2 M+NH4 Atlas	Lipids and lipid-like molecules	Glycerolipids	Triradylcglycerols	HMDB0005435	TG(16:1(9Z)/16:1(9Z)/18:2(9Z,12Z))	Glycerolipids [GL]	Triradylglycerols [GL03]	Triacylglycerols [GL0301]	LMGL03010064	TG(16:1(9Z)/16:1(9Z)/18:2(9Z,12Z))[iso3]	TG 50:4	TG 16:1_16:1_18:2	PVMBAGXWHHZKFP-BGWVPBAENA-N	C53H94O6	1	M+NH4	844.734		10.25	10.21	81.9892	4.22005	100	100	0.889714	1.52962e-17	2.84968e-16	0.647221	2.5913e-05	0.000287973	1.04906	0.000202777	0.0027074	0.415758	0.000541491	0.00350164	0.423733	5.77847e-13	8.01137e-12
TAG O-54:5	TAG-O	RP_PosMS1_1305		Y	GL	TG O-10:0_22:0_22:5 M+Na Atlas --- TG O-10:0_22:1_22:4 M+Na Atlas --- TG O-10:0_22:2_22:3 M+Na Atlas --- TG O-12:0_20:0_22:5 M+Na Atlas --- TG O-12:0_20:1_22:4 M+Na Atlas --- TG O-12:0_20:2_22:3 M+Na Atlas --- TG O-12:0_20:3_22:2 M+Na Atlas --- TG O-12:0_20:4_22:1 M+Na Atlas --- TG O-12:0_20:5_22:0 M+Na Atlas --- TG O-14:0_18:0_22:5 M+Na Atlas --- TG O-14:0_18:1_22:4 M+Na Atlas --- TG O-14:0_18:2…	Lipids and lipid-like molecules	Fatty Acyls --- Glycerolipids	Lineolic acids and derivatives --- Triradylcglycerols	HMDB0055259, HMDB0055422, HMDB0055580, HMDB0055696, HMDB0055806	TG(18:3(9Z,12Z,15Z)/18:2(9Z,12Z)/O-18:0) --- TG(18:4(6Z,9Z,12Z,15Z)/18:1(9Z)/O-18:0) --- TG(20:4(8Z,11Z,14Z,17Z)/16:1(9Z)/O-18:0) --- TG(20:5(5Z,8Z,11Z,14Z,17Z)/16:0/O-18:0) --- TG(22:5(7Z,10Z,13Z,16Z,19Z)/14:0/O-18:0)								AGFTZVSMCLOSIY-FTIGKAJQNA-N, AIUVJALCPQQZKY-ZIIWPKBNNA-N, ALRYGISNCOGPPP-OICHCAPJNA-N, AZLBMOBEDBPFEA-QKLHUKANNA-N, BBVLSHGTNZLNEK-CWYNIMAXNA-N, BHOPMCVPTGXKIG-JBGBZAIHNA-N, BIDAGIJMAYHGCB-VHFYUWFQNA-N, BJCBZBUFEVRHIS-MCWYWDINNA-N, BKBGZMKMOHQABR-RWKWVMFJNA-N, BKYZHIKGJIIPON-IRTFZWGFNA-N, BSAYGCMKJYTXKF-RVEVLWSJNA-N, BVSQGOMLFDHPRF-CMXIPZJXNA-N, BYOHWVYKSSPMGT-MMURQVPWNA-N, BYVJNCWUAAPRAM-HVEFIRB…	C57H102O5	1	M+Na	889.763		10.28	10.18	58.0645	14.4803	95.8678	100	0.867325	1.50998e-17	2.84968e-16	0.61412	4.43626e-05	0.000421554	0.997599	0.000297301	0.00369568	0.555168	9.62088e-07	0.000137461	0.408788	1.20029e-12	1.52248e-11
TAG 59:3	TAG	RP_PosMS1_1496		Y	GL	TG 10:0_13:0_36:3 M+Na Atlas --- TG 10:0_13:1_36:2 M+Na Atlas --- TG 10:0_15:0_34:3 M+Na Atlas --- TG 10:0_15:1_34:2 M+Na Atlas --- TG 10:0_16:3_33:0 M+Na Atlas --- TG 10:0_17:0_32:3 M+Na Atlas --- TG 10:0_17:1_32:2 M+Na Atlas --- TG 10:0_17:2_32:1 M+Na Atlas --- TG 10:0_18:3_31:0 M+Na Atlas --- TG 10:0_19:0_30:3 M+Na Atlas --- TG 10:0_19:1_30:2 M+Na Atlas --- TG 10:0_19:2_30:1 M+Na Atlas --- TG …	Lipids and lipid-like molecules	Glycerolipids	Triradylcglycerols	HMDB0043356	TG(15:0/22:1(13Z)/22:2(13Z,16Z))	Glycerolipids [GL]	Triradylglycerols [GL03]	Triacylglycerols [GL0301]	LMGL03011052 --- LMGL03011081 --- LMGL03011112 --- LMGL03011113 --- LMGL03011119 --- LMGL03011120 --- LMGL03011121 --- LMGL03011205 --- LMGL03011210 --- LMGL03011211 --- LMGL03011254 --- LMGL03011255 --- LMGL03011256 --- LMGL03011266 --- LMGL03011274 --- LMGL03011351 --- LMGL03011366 --- LMGL03011512 --- LMGL03013138 --- LMGL03015337 --- LMGL03015687 --- LMGL03016198 --- LMGL03016334 --- LMGL0301…	TG(15:0/22:0/22:3(10Z,13Z,16Z))[iso6] --- TG(15:1(9Z)/22:0/22:2(13Z,16Z))[iso6] --- TG(16:0/21:0/22:3(10Z,13Z,16Z))[iso6] --- TG(16:1(9Z)/21:0/22:2(13Z,16Z))[iso6] --- TG(17:0/20:0/22:3(10Z,13Z,16Z))[iso6] --- TG(17:0/20:1(11Z)/22:2(13Z,16Z))[iso6] --- TG(17:0/20:2(11Z,14Z)/22:1(13Z))[iso6] --- TG(17:1(9Z)/20:0/22:2(13Z,16Z))[iso6] --- TG(17:1(9Z)/20:1(11Z)/22:1(13Z))[iso6] --- TG(17:1(9Z)/20:2(1…	TG 59:3	TG 15:0_22:0_22:3 --- TG 15:1_22:0_22:2 --- TG 16:0_21:0_22:3 --- TG 16:1_21:0_22:2 --- TG 17:0_20:0_22:3 --- TG 17:0_20:1_22:2 --- TG 17:0_20:2_22:1 --- TG 17:1_20:0_22:2 --- TG 17:1_20:1_22:1 --- TG 17:1_20:2_22:0 --- TG 17:2_20:0_22:1 --- TG 17:2_20:1_22:0 --- TG 18:0_19:0_22:3 --- TG 18:0_19:1_22:2 --- TG 18:1_19:0_22:2 --- TG 18:1_20:2_21:0 --- TG 18:2_19:0_22:1 --- TG 18:2_19:1_22:0 --- TG …	AIBCADAVAQGLQU-QXORKPRHNA-N, AJUVLVCEMPODRA-IKXCIFBPNA-N, ANFLXYQMQDQBRY-FJIRYKCTNA-N, ANVAKBDFPMBCSQ-AAAXEXNWNA-N, AOTHVZQTIVNCEU-ONGBHLIUNA-N, ATDOZXNBHSHFFT-LWIXAHBUNA-N, AVQJTAJHIBFEGF-NFCRBEBANA-N, BFUVDOIFQAYDOE-XXTYUAAQNA-N, BGVXPOXCABKOJS-OVDOLTILNA-N, BHZMKAQZWXZWHH-GEVDZPJCNA-N, BJMKOPVJMQPYSO-BQWKMGCYNA-N, BLQCAPPAOVFKTQ-ABJOXCPJNA-N, BMCUUEIBHRJUCV-XCWSFUEJNA-N, BPBVLPZEEYDCLL-VPTSHLA…	C62H114O6	1	M+Na	977.843		11.82	11.82	45.6989	9.98298	58.6777	100	0.837989	2.42712e-17	4.38471e-16	0.707918	7.11216e-07	1.72712e-05	0.987609	0.000217849	0.00285574	0.445499	7.48074e-05	0.000805406	0.416319	2.99725e-14	6.16152e-13
DAG 35:2	DAG	RP_PosMS1_548		Y	GL	Cer 10:0;3O/28:2;(2OH) M+H Atlas --- Cer 12:0;3O/26:2;(2OH) M+H Atlas --- Cer 12:1;3O/26:1;(2OH) M+H Atlas --- Cer 13:1;3O/25:1;(2OH) M+H Atlas --- Cer 14:0;3O/24:2;(2OH) M+H Atlas --- Cer 14:1;3O/24:1;(2OH) M+H Atlas --- Cer 14:2;3O/24:0;(2OH) M+H Atlas --- Cer 15:1;3O/23:1;(2OH) M+H Atlas --- Cer 15:2;3O/23:0;(2OH) M+H Atlas --- Cer 16:0;3O/22:2;(2OH) M+H Atlas --- Cer 16:1;3O/22:1;(2OH) M+H At…	Lipids and lipid-like molecules	Glycerolipids	Diradylglycerols	HMDB0007080	DG(15:0/20:2(11Z,14Z)/0:0)	Glycerolipids [GL]	Diradylglycerols [GL02]	Diacylglycerols [GL0201]	LMGL02010007 --- LMGL02010034 --- LMGL02010373 --- LMGL02010438 --- LMGL02010461	DG(13:0/22:2(13Z,16Z)/0:0)[iso2] --- DG(15:0/20:2(11Z,14Z)/0:0)[iso2] --- DG(15:1(9Z)/20:1(11Z)/0:0)[iso2] --- DG(17:0/18:2(9Z,12Z)/0:0)[iso2] --- DG(17:1(9Z)/18:1(9Z)/0:0)	DG 35:2	DG 13:0_22:2 --- DG 15:0_20:2 --- DG 15:1_20:1 --- DG 17:0_18:2 --- DG 17:1_18:1	AKNLWXWCZYBSSG-UHFFFAOYNA-N, ANSNQVMESBTIOH-UDJAPEQQNA-N, AWVUMYROWBYWSZ-AUGURXLVNA-N, AXTPXKFEQUVSSY-UHFFFAOYNA-N, AYGWYZZIQGPBBS-UHFFFAOYNA-N, BLIOENUSURSSLH-JIPMDXOYNA-N, BZPWLRVIJUDKRD-JIPMDXOYNA-N, CLLIYAMXQDGBGD-UHFFFAOYNA-N, CTIBVNXGDQYYTM-UHFFFAOYNA-N, FFBJQGBFCFQPQB-UHFFFAOYNA-N, GICFNACOTLUSOD-LTXDKZCQNA-N, GSPZTQLYEVYWQY-DPTWWRMPNA-N, GUHVZTQBIOBUCQ-HHYHAGCXNA-N, HCMARDSZOYULBF-WMBONII…	C37[13]CH70O5, C38H70O5	1	M+H --- M+NH4	624.552		7.45	7.38	29.0323	20.8605	80.1653	100	0.875801	2.54737e-17	4.46659e-16	0.712207	2.09667e-06	4.14417e-05	1.05192	0.000161704	0.00219974	0.409956	0.000562555	0.00358915	0.431305	6.3561e-14	1.15033e-12
TAG 54:4	TAG	RP_PosMSMS_1335, 1346		Y	GL	TG 18:1_18:1_18:2 M+NH4 Atlas, TG 18:1_18:1_18:2 M+Na Atlas	Lipids and lipid-like molecules	Glycerolipids	Triradylcglycerols	HMDB0005455	TG(18:1(9Z)/18:1(9Z)/18:2(9Z,12Z))	Glycerolipids [GL]	Triradylglycerols [GL03]	Triacylglycerols [GL0301]	LMGL03010288	TG(18:1(9Z)/18:1(9Z)/18:2(9Z,12Z))[iso3]	TG 54:4	TG 18:1_18:1_18:2	JTMWOTXEVWLTTO-KTKRTRQNNA-N	C57H102O6	1	M+NH4, M+Na	900.7952, 905.7507		10.91	10.875	95.4301	2.96469	96.6942	100	0.841749	3.41803e-17	5.82198e-16	0.659357	5.81072e-06	9.76902e-05	0.993772	0.000222396	0.0028633	0.432065	0.000145311	0.00135309	0.409205	2.14178e-13	3.36012e-12
TAG 55:3	TAG	RP_PosMSMS_1375, 1387		Y	GL	TG 18:1_18:1_19:1 M+NH4 Atlas, TG 18:1_18:1_19:1 M+Na Atlas						Glycerolipids [GL]	Triradylglycerols [GL03]	Triacylglycerols [GL0301]	LMGL03013031	TG(18:1(9Z)/18:1(9Z)/19:1(9Z))[iso3]	TG 55:3	TG 18:1_18:1_19:1	ASJJOPLGTKDUEX-UWDAMKIQNA-N	C58H106O6	2, 1	M+NH4, M+Na	916.8265, 921.782	617.552	11.325	11.31	63.9785	5.35843	86.7769	100	0.849914	6.15397e-17	1.0191e-15	0.701029	1.77408e-06	3.75229e-05	1.05113	0.000113064	0.00169828	0.482539	2.45684e-05	0.000384746	0.421901	6.36758e-14	1.15033e-12
TAG 52:5	TAG	RP_PosMSMS_1256, 1267		Y	GL	TG 16:0_18:2_18:3 M+NH4 Atlas, TG 16:0_18:2_18:3 M+Na Atlas --- TG 16:1_16:1_20:3 M+Na Atlas --- TG 16:1_18:2_18:2 M+Na Atlas	Lipids and lipid-like molecules	Glycerolipids	Triradylcglycerols	HMDB0044270, HMDB0005446, HMDB0044270	TG(16:1(9Z)/18:2(9Z,12Z)/18:2(9Z,12Z)) --- TG(16:0/18:2(9Z,12Z)/18:3(9Z,12Z,15Z))	Glycerolipids [GL]	Triradylglycerols [GL03]	Triacylglycerols [GL0301]	LMGL03010167, LMGL03010163 --- LMGL03010167	TG(16:0/18:2(9Z,12Z)/18:3(9Z,12Z,15Z))[iso6], TG(16:0/18:2(9Z,12Z)/18:3(9Z,12Z,15Z))[iso6] --- TG(16:1(9Z)/18:2(9Z,12Z)/18:2(9Z,12Z))[iso3]	TG 52:5	TG 16:0_18:2_18:3, TG 16:0_18:2_18:3 --- TG 16:1_18:2_18:2	MVAGPZSVOSGBMR-NTBFVYIFNA-N, CQZAAIKPSLHIBC-BDMHOKOONA-N, MVAGPZSVOSGBMR-NTBFVYIFNA-N, WSUXTFXYYDVMHN-BWRFOULENA-N	C55H96O6	1	M+NH4, M+Na	870.7486, 875.704		10.35	10.31	95.6989	2.13448	99.1736	100	0.87293	6.54784e-17	1.05502e-15	0.642105	2.6964e-05	0.000290056	0.982128	0.000495576	0.00517831	0.385845	0.00130407	0.00671375	0.414476	1.78735e-12	2.17458e-11
TAG 60:1	TAG	RP_PosMSMS_1524		Y	GL	TG 16:0_18:1_26:0 M+NH4 Atlas													DYZHJUXPPHGBHW-JYUHDHNANA-N	C63H120O6	2	M+NH4	990.935	691.66	12.38	12.37	31.9892	9.9799	72.7273	100	0.828073	7.79944e-17	1.19393e-15	0.719635	4.16876e-07	1.15139e-05	1.1284	1.82437e-05	0.000438449	0.498506	7.02369e-06	0.000213515	0.423031	6.77258e-15	1.5529e-13
TAG 60:4	TAG	RP_PosMSMS_1509, 1520		Y	GL	TG 18:1_18:2_24:1 M+NH4 Atlas --- TG 18:2_18:2_24:0 M+NH4 Atlas, TG 10:0_12:0_38:4 M+Na Atlas --- TG 10:0_14:0_36:4 M+Na Atlas --- TG 10:0_14:1_36:3 M+Na Atlas --- TG 10:0_16:0_34:4 M+Na Atlas --- TG 10:0_16:1_34:3 M+Na Atlas --- TG 10:0_16:2_34:2 M+Na Atlas --- TG 10:0_16:3_34:1 M+Na Atlas --- TG 10:0_16:4_34:0 M+Na Atlas --- TG 10:0_18:0_32:4 M+Na Atlas --- TG 10:0_18:1_32:3 M+Na Atlas --- TG 1…	Lipids and lipid-like molecules	Glycerolipids	Triradylcglycerols	HMDB0047374, HMDB0044407, HMDB0044533, HMDB0045144, HMDB0045319, HMDB0045345, HMDB0045602, HMDB0045932, HMDB0046375, HMDB0046549, HMDB0046691, HMDB0047561, HMDB0048711, HMDB0049931, HMDB0050044, HMDB0050515, HMDB0051486, HMDB0051597, HMDB0052461	TG(16:0/22:2(13Z,16Z)/22:2(13Z,16Z)) --- TG(16:0/20:4(8Z,11Z,14Z,17Z)/24:0) --- TG(18:0/20:2n6/22:2(13Z,16Z)) --- TG(18:0/18:4(6Z,9Z,12Z,15Z)/24:0) --- TG(18:0/20:4(8Z,11Z,14Z,17Z)/22:0) --- TG(20:0/20:0/20:4(8Z,11Z,14Z,17Z)) --- TG(20:0/20:2n6/20:2n6) --- TG(22:0/20:0/18:4(6Z,9Z,12Z,15Z)) --- TG(22:0/20:1(11Z)/18:3(9Z,12Z,15Z)) --- TG(22:0/20:2n6/18:2(9Z,12Z)) --- TG(24:0/18:2(9Z,12Z)/18:2(9Z,12…	Glycerolipids [GL]	Triradylglycerols [GL03]	Triacylglycerols [GL0301]	LMGL03011234 --- LMGL03011235 --- LMGL03011356 --- LMGL03011357 --- LMGL03011414 --- LMGL03011415 --- LMGL03011423 --- LMGL03011424 --- LMGL03011425 --- LMGL03011501 --- LMGL03011502 --- LMGL03011516 --- LMGL03011517 --- LMGL03011518 --- LMGL03011578 --- LMGL03011659 --- LMGL03011729 --- LMGL03011733 --- LMGL03013111 --- LMGL03013132 --- LMGL03016589 --- LMGL03016684	TG(16:0/22:1(13Z)/22:3(10Z,13Z,16Z))[iso6] --- TG(16:0/22:2(13Z,16Z)/22:2(13Z,16Z))[iso3] --- TG(16:1(9Z)/22:0/22:3(10Z,13Z,16Z))[iso6] --- TG(16:1(9Z)/22:1(13Z)/22:2(13Z,16Z))[iso6] --- TG(17:1(9Z)/21:0/22:3(10Z,13Z,16Z))[iso6] --- TG(17:2(9Z,12Z)/21:0/22:2(13Z,16Z))[iso6] --- TG(18:0/20:1(11Z)/22:3(10Z,13Z,16Z))[iso6] --- TG(18:0/20:2(11Z,14Z)/22:2(13Z,16Z))[iso6] --- TG(18:1(9Z)/20:0/22:3(10Z,…	TG 60:4	TG 16:0_22:1_22:3 --- TG 16:0_22:2_22:2 --- TG 16:1_22:0_22:3 --- TG 16:1_22:1_22:2 --- TG 17:1_21:0_22:3 --- TG 17:2_21:0_22:2 --- TG 18:0_20:1_22:3 --- TG 18:0_20:2_22:2 --- TG 18:1_20:0_22:3 --- TG 18:1_20:1_22:2 --- TG 18:1_20:2_22:1 --- TG 18:2_20:0_22:2 --- TG 18:2_20:1_22:1 --- TG 18:2_20:2_22:0 --- TG 18:3_20:0_22:1 --- TG 18:3_20:1_22:0 --- TG 18:4_20:0_22:0 --- TG 18:4_21:0_21:0 --- TG …	MENKUUOOQRGDSS-ZQQHQYNCNA-N, XZAGSBKJZPKPEY-YFNLZEDVNA-N, ACZASUQXRILREG-BNINLGCINA-N, ADOBHPWXSADQKB-DITBIAKCNA-N, AFCARJHPTWBXMP-NDJMKUGSNA-N, AGXJZEMUKUFWEP-VEGREPQHNA-N, AHEJGKZSHPHKMW-YEMBNXSPNA-N, AHYOFQHJCROZHS-XIWPLKEYNA-N, AICLQUNXZAFFGB-HRCUNEKLNA-N, AICMDXVOSWMLEK-DXZNHEADNA-N, AIJZDCRCOWFNRQ-YBQWMRSQNA-N, AKPKCLGDROTCJT-MQBCOREXNA-N, ALPJLRIZDZGUSC-ONNGZFICNA-N, AQLOTZOLEYWFCG-SCHCMUD…	C63H114O6	1	M+NH4, M+Na	984.8892, 989.8442		11.8	11.79	45.9677	8.4244	61.157	100	0.820762	7.81055e-17	1.19393e-15	0.662329	3.34622e-06	5.92978e-05	1.11409	1.9832e-05	0.000461246	0.413634	0.000221027	0.00184232	0.410129	4.4605e-14	8.57798e-13
TAG 57:7	TAG	RP_PosMS1_1420		Y	GL	TG 10:0_11:0_36:7 M+NH4 Atlas --- TG 10:0_13:0_34:7 M+NH4 Atlas --- TG 10:0_13:1_34:6 M+NH4 Atlas --- TG 10:0_15:0_32:7 M+NH4 Atlas --- TG 10:0_15:1_32:6 M+NH4 Atlas --- TG 10:0_17:0_30:7 M+NH4 Atlas --- TG 10:0_17:1_30:6 M+NH4 Atlas --- TG 10:0_17:2_30:5 M+NH4 Atlas --- TG 10:0_19:0_28:7 M+NH4 Atlas --- TG 10:0_19:1_28:6 M+NH4 Atlas --- TG 10:0_19:2_28:5 M+NH4 Atlas --- TG 10:0_21:0_26:7 M+NH4 A…	Lipids and lipid-like molecules	Glycerolipids	Triradylcglycerols	HMDB0043306, HMDB0043479, HMDB0043733	TG(15:0/20:1(11Z)/22:6(4Z,7Z,10Z,13Z,16Z,19Z)) --- TG(15:0/20:2n6/22:5(7Z,10Z,13Z,16Z,19Z)) --- TG(15:0/20:5(5Z,8Z,11Z,14Z,17Z)/22:2(13Z,16Z))	Glycerolipids [GL]	Triradylglycerols [GL03]	Triacylglycerols [GL0301]	LMGL03010879 --- LMGL03010880 --- LMGL03010881 --- LMGL03010980 --- LMGL03010981 --- LMGL03011025 --- LMGL03011071 --- LMGL03011072 --- LMGL03011073 --- LMGL03011076 --- LMGL03011077 --- LMGL03011136 --- LMGL03011229 --- LMGL03014129 --- LMGL03014956 --- LMGL03015289 --- LMGL03015299 --- LMGL03015323 --- LMGL03015628 --- LMGL03015639 --- LMGL03015787 --- LMGL03015877 --- LMGL03015946 --- LMGL0301…	TG(13:0/22:2(13Z,16Z)/22:5(7Z,10Z,13Z,16Z,19Z))[iso6] --- TG(14:1(9Z)/21:0/22:6(4Z,7Z,10Z,13Z,16Z,19Z))[iso6] --- TG(15:0/20:1(11Z)/22:6(4Z,7Z,10Z,13Z,16Z,19Z))[iso6] --- TG(15:0/20:2(11Z,14Z)/22:5(7Z,10Z,13Z,16Z,19Z))[iso6] --- TG(15:0/20:5(5Z,8Z,11Z,14Z,17Z)/22:2(13Z,16Z))[iso6] --- TG(15:1(9Z)/20:0/22:6(4Z,7Z,10Z,13Z,16Z,19Z))[iso6] --- TG(15:1(9Z)/20:1(11Z)/22:5(7Z,10Z,13Z,16Z,19Z))[iso6] ---…	TG 57:7	TG 13:0_22:2_22:5 --- TG 14:1_21:0_22:6 --- TG 15:0_20:1_22:6 --- TG 15:0_20:2_22:5 --- TG 15:0_20:5_22:2 --- TG 15:1_20:0_22:6 --- TG 15:1_20:1_22:5 --- TG 16:0_19:1_22:6 --- TG 16:1_19:0_22:6 --- TG 16:1_19:1_22:5 --- TG 17:0_18:1_22:6 --- TG 17:0_18:2_22:5 --- TG 17:0_18:4_22:3 --- TG 17:0_20:2_20:5 --- TG 17:1_18:0_22:6 --- TG 17:1_18:1_22:5 --- TG 17:1_18:3_22:3 --- TG 17:1_18:4_22:2 --- TG …	ABIHZYKHJQIRRS-BWQGAKPSNA-N, AHECPNVJGGXMBX-CNTGQPGTNA-N, AJRLEIAYQWSFPO-JELOBYIYNA-N, AQUHXDMGHQXAAQ-NWAVVKKPNA-N, ATCCFGNTXPYXKT-BEDDTURCNA-N, AULVFZDMHSTHBW-GYLSQDBANA-N, AZVDETBIUDDFMS-RHNYNXFHNA-N, BBCQBYHUQXHRSN-RUWKNYBFNA-N, BCPBCAGXYTYWRU-FHNQPHBPNA-N, BDRFJGUKBPRFCR-HIMZQEJRNA-N, BEBMAFRJXCVJBT-GAOPFFRGNA-N, BEOARQCIBZURTR-KBKNCFMVNA-N, BEWDUIYNCJDHHO-KJFYEOLCNA-N, BNLJLJHFQCSBJR-IIPVNNF…	C60H102O6	1	M+NH4	936.801		11.44	11.44	75	6.64449	100	100	0.819191	1.05896e-16	1.57828e-15	0.667758	2.77702e-06	5.146e-05	1.00892	0.000132307	0.00190783	0.470603	2.13489e-05	0.000381686	0.405035	1.29939e-13	2.15178e-12
22:1-Glc-cholesterol --- 20:0-Glc-Stigmasterol --- 20:1-Glc-Sitosterol	ST - Sterols	RP_PosMS1_1296		Y	nonGL	DGTS 19:0_26:4 M+H Atlas --- DGTS 19:2_26:2 M+H Atlas --- DGTS 21:0_24:4 M+H Atlas --- DGTS 21:2_24:2 M+H Atlas --- DGTS 23:0_22:4 M+H Atlas --- DGTS 25:0_20:4 M+H Atlas --- DGTS 27:0_18:4 M+H Atlas --- ST 27:1;O;Hex;FA 22:1 M+NH4 Atlas --- ST 28:1;O;Hex;FA 21:1 M+NH4 Atlas --- ST 28:2;O;Hex;FA 21:0 M+NH4 Atlas --- ST 29:1;O;Hex;FA 20:1 M+NH4 Atlas --- ST 29:2;O;Hex;FA 20:0 M+NH4 Atlas						Sterols [ST]	Sterols [ST01]	Cholesterol and derivatives [ST0101] --- Stigmasterols and C24-ethyl derivatives [ST0104]	LMST01010380 --- LMST01040212 --- LMST01040220	20:0-Glc-Stigmasterol --- 20:1-Glc-Sitosterol --- 22:1-Glc-cholesterol			AHMUFSDJNIXUNB-MSUUIHNZNA-N, AQDFXHJFXQQRQH-QKDPPNRANA-N, BGDMIUPEQTWCFM-BIONNELKNA-N, BHDQCDQMHMQSEK-XHFJISOBNA-N, DNXLORFBEHTTIB-FRXQITOYNA-N, GBQNICLTGPXXHP-CMXGIODNNA-N, GLIFFCMPKHWBQR-UHFFFAOYNA-N, OWEPGXIQRKLGHT-PFONDFGANA-N, QSRIRQLQFJPCQG-MSUUIHNZNA-N, RUCQBZOIQXMULS-UHFFFAOYNA-N, ZUUDQYPYIQKLLO-RNBIMDHUNA-N, ZXQXKXGUBNASLO-XXXLRELONA-N	C55H96O7	1	M+H --- M+NH4	886.746		9.96	9.89	63.7097	21.5749	98.3471	100	0.861144	1.33782e-16	1.94525e-15	0.646671	2.0137e-05	0.000240059	1.08095	9.90984e-05	0.00164964	0.560282	1.06397e-06	0.000137461	0.417165	7.0245e-13	9.30605e-12
TAG 49:3	TAG	RP_PosMSMS_1126		Y	GL	TG 15:0_16:1_18:2 M+NH4 Atlas	Lipids and lipid-like molecules	Glycerolipids	Triradylcglycerols	HMDB0043206	TG(15:0/16:1(9Z)/18:2(9Z,12Z))	Glycerolipids [GL]	Triradylglycerols [GL03]	Triacylglycerols [GL0301]	LMGL03015036	TG(15:0/16:1(9Z)/18:2(9Z,12Z))[iso6]	TG 49:3	TG 15:0_16:1_18:2	CQSXCZMDDSQLAG-SWVFECATNA-N	C52H94O6	1	M+NH4	832.734		10.37	10.34	70.1613	5.71107	100	100	0.867288	1.91902e-16	2.72392e-15	0.642129	2.90387e-05	0.000307094	1.00215	0.000391921	0.00444698	0.447487	0.000173845	0.00154898	0.413932	2.50282e-12	2.98416e-11
TAG 48:3	TAG	RP_PosMSMS_1085		Y	GL	TG 12:0_18:1_18:2 M+NH4 Atlas --- TG 14:0_16:1_18:2 M+NH4 Atlas --- TG 16:1_16:1_16:1 M+NH4 Atlas	Lipids and lipid-like molecules	Glycerolipids	Triradylcglycerols	HMDB0005432	TG(16:1(9Z)/16:1(9Z)/16:1(9Z))	Glycerolipids [GL]	Triradylglycerols [GL03]	Triacylglycerols [GL0301]	LMGL03010020	TG(16:1(9Z)/16:1(9Z)/16:1(9Z))	TG 48:3	TG 16:1_16:1_16:1	IWSNEFQVYNGXGZ-XFYMDHNZNA-N, PURPKTYKZMLEGI-PODSLZKANA-N, SKGWNZXOCSYJQL-BUTYCLJRSA-N	C51H92O6	1	M+NH4	818.718		10.17	10.12	75.5376	5.20234	99.1736	100	0.866271	2.1462e-16	2.97554e-15	0.617987	6.11454e-05	0.000541773	1.01886	0.000306727	0.0037418	0.416052	0.000518529	0.0034355	0.410296	4.45576e-12	5.10836e-11
TAG 51:3	TAG	RP_PosMSMS_1217		Y	GL	TG 15:0_18:1_18:2 M+NH4 Atlas	Lipids and lipid-like molecules	Glycerolipids	Triradylcglycerols	HMDB0011708	TG(15:0/18:1(9Z)/18:2(9Z,12Z))	Glycerolipids [GL]	Triradylglycerols [GL03]	Triacylglycerols [GL0301]	LMGL03015146	TG(15:0/18:1(9Z)/18:2(9Z,12Z))[iso6]	TG 51:3	TG 15:0_18:1_18:2	AFUGNQFGFOCTMS-FBSASISJNA-N	C54H98O6	1	M+NH4	860.764		10.69	10.66	89.7849	4.08008	100	100	0.861942	2.22262e-16	3.01145e-15	0.644685	2.42644e-05	0.000276252	0.969425	0.000584047	0.00561453	0.475972	5.41565e-05	0.000621941	0.41111	2.87569e-12	3.36152e-11
TAG O-58:8	TAG-O	RP_PosMS1_1425		Y	GL	TG O-14:0_22:2_22:6 M+Na Atlas --- TG O-14:0_22:3_22:5 M+Na Atlas --- TG O-14:0_22:4_22:4 M+Na Atlas --- TG O-14:1_22:1_22:6 M+Na Atlas --- TG O-14:1_22:2_22:5 M+Na Atlas --- TG O-14:1_22:3_22:4 M+Na Atlas --- TG O-16:0_20:2_22:6 M+Na Atlas --- TG O-16:0_20:3_22:5 M+Na Atlas --- TG O-16:0_20:4_22:4 M+Na Atlas --- TG O-16:0_20:5_22:3 M+Na Atlas --- TG O-16:1_20:1_22:6 M+Na Atlas --- TG O-16:1_20:2…	Lipids and lipid-like molecules	Glycerolipids	Triradylcglycerols	HMDB0055665, HMDB0055875, HMDB0055924	TG(20:4(8Z,11Z,14Z,17Z)/20:4(8Z,11Z,14Z,17Z)/O-18:0) --- TG(22:5(7Z,10Z,13Z,16Z,19Z)/18:3(9Z,12Z,15Z)/O-18:0) --- TG(22:6(4Z,7Z,10Z,13Z,16Z,19Z)/18:2(9Z,12Z)/O-18:0)								AHHJCCMBNSDNSM-OSECODGINA-N, ARBXTMKJIREHPF-HCFRXQNUNA-N, ASFUUOMDRHYQBB-QOCIHODJNA-N, ASWWTNDDOJYMOI-ZOQIHZJFNA-N, ATEIXYXYOPYTPF-VITKEJEQNA-N, AURMEAUNTNUNLD-ODZMZKPZNA-N, AWCMKHXLMDRCAR-XECXVXQNNA-N, BBRGEZIQKKCCEK-UJTXMOLFNA-N, BFDDQHXIBZGNEI-FQPFWEJJNA-N, BLICQCDAUJDWPA-OSTOHTDPNA-N, BPDDMFJNGICJTB-VUSPYMQXNA-N, BPYAYANMJZFOSF-RSHDGKHENA-N, BTZYNOJSVMZPNZ-WYJGHMEUNA-N, BXFYVQIDKGQCHV-QSSQYJF…	C61H104O5	1	M+Na	939.772		11.56	11.53	83.6022	11.0781	91.7355	100	0.830816	2.28331e-16	3.02493e-15	0.651437	8.64826e-06	0.000128873	0.906366	0.000875344	0.00761275	0.490446	1.39068e-05	0.000266179	0.400039	1.54121e-12	1.91419e-11
TAG 51:4	TAG	RP_PosMSMS_1210, 1231		Y	GL	TG 15:0_18:2_18:2 M+NH4 Atlas --- TG 15:1_18:1_18:2 M+NH4 Atlas --- TG 16:1_17:1_18:2 M+NH4 Atlas, TG 15:0_18:1_18:3 M+Na Atlas --- TG 15:0_18:2_18:2 M+Na Atlas --- TG 16:1_17:1_18:2 M+Na Atlas	Lipids and lipid-like molecules	Glycerolipids	Triradylcglycerols	HMDB0011711, HMDB0011709, HMDB0011711	TG(15:0/18:1(9Z)/18:3(9Z,12Z,15Z)) --- TG(15:0/18:2(9Z,12Z)/18:2(9Z,12Z))	Glycerolipids [GL]	Triradylglycerols [GL03]	Triacylglycerols [GL0301]	LMGL03010089 --- LMGL03012907 --- LMGL03015497, LMGL03010089 --- LMGL03012907 --- LMGL03015148	TG(15:0/18:2(9Z,12Z)/18:2(9Z,12Z))[iso3] --- TG(15:1(9Z)/18:1(9Z)/18:2(9Z,12Z))[iso6] --- TG(16:1(9Z)/17:1(9Z)/18:2(9Z,12Z))[iso6], TG(15:0/18:1(9Z)/18:3(9Z,12Z,15Z))[iso6] --- TG(15:0/18:2(9Z,12Z)/18:2(9Z,12Z))[iso3] --- TG(16:1(9Z)/17:1(9Z)/18:2(9Z,12Z))[iso6]	TG 51:4	TG 15:0_18:2_18:2 --- TG 15:1_18:1_18:2 --- TG 16:1_17:1_18:2, TG 15:0_18:1_18:3 --- TG 15:0_18:2_18:2 --- TG 16:1_17:1_18:2	JHMHYYIDGDQQFH-DSZOASMONA-N, LJSWNLLJRASQSC-AUOINHTKNA-N, MIHLTJZHRJACQQ-YBQWMRSQNA-N, AKXOSLAHFAWDCG-IPYQHOITNA-N, LJSWNLLJRASQSC-AUOINHTKNA-N, MIHLTJZHRJACQQ-YBQWMRSQNA-N	C54H96O6	1	M+NH4, M+Na	858.7495, 863.7048		10.455	10.44	77.6882	11.6638	97.5207	100	0.851211	2.79379e-16	3.62076e-15	0.555847	0.000282965	0.0019127	0.961654	0.000566416	0.00551862	0.396334	0.000812422	0.00512011	0.392048	2.9451e-11	2.74336e-10
TAG 48:2	TAG	RP_PosMSMS_1090		Y	GL	TG 14:0_16:1_18:1 M+NH4 Atlas	Lipids and lipid-like molecules	Glycerolipids	Triradylcglycerols	HMDB0042311	TG(14:0/16:1(9Z)/18:1(9Z))	Glycerolipids [GL]	Triradylglycerols [GL03]	Triacylglycerols [GL0301]	LMGL03014251	TG(14:0/16:1(9Z)/18:1(9Z))[iso6]	TG 48:2	TG 14:0_16:1_18:1	QABWZGMVIDDGGI-WYERXJFXNA-N	C51H94O6	1	M+NH4	820.733		10.46	10.41	99.4624	4.95986	100	100	0.855512	5.90907e-16	7.49521e-15	0.635045	3.44876e-05	0.000347885	0.983964	0.000490324	0.00517831	0.462335	9.58194e-05	0.000952273	0.408355	5.16377e-12	5.75076e-11
TAG 46:1	TAG	RP_PosMSMS_1005		Y	GL	TG 12:0_16:0_18:1 M+NH4 Atlas --- TG 14:0_16:0_16:1 M+NH4 Atlas	Lipids and lipid-like molecules	Glycerolipids	Triradylcglycerols	HMDB0042129	TG(14:0/16:0/16:1(9Z))	Glycerolipids [GL]	Triradylglycerols [GL03]	Triacylglycerols [GL0301]	LMGL03013326 --- LMGL03014221	TG(12:0/16:0/18:1(9Z))[iso6] --- TG(14:0/16:0/16:1(9Z))[iso6]	TG 46:1	TG 12:0_16:0_18:1 --- TG 14:0_16:0_16:1	JYICXCHHKWVGEI-QOCHGBHMNA-N, KKDKCSAJJXXLKK-VHXPQNKSNA-N	C49H92O6	2	M+NH4	794.717	577.516	10.4	10.37	93.0108	5.11283	100	100	0.838001	6.92644e-16	8.60264e-15	0.620076	3.79226e-05	0.000371116	0.930309	0.000806152	0.00745159	0.435944	0.000186991	0.00163788	0.397867	8.04637e-12	8.41566e-11
TAG 53:9	TAG	RP_PosMS1_1270		Y	GL	TG 10:0_11:0_32:9 M+NH4 Atlas --- TG 10:0_13:1_30:8 M+NH4 Atlas --- TG 10:0_17:2_26:7 M+NH4 Atlas --- TG 11:0_16:2_26:7 M+NH4 Atlas --- TG 11:0_16:3_26:6 M+NH4 Atlas --- TG 11:0_16:4_26:5 M+NH4 Atlas --- TG 11:0_18:3_24:6 M+NH4 Atlas --- TG 11:0_18:4_24:5 M+NH4 Atlas --- TG 11:0_18:5_24:4 M+NH4 Atlas --- TG 11:0_20:3_22:6 M+NH4 Atlas --- TG 11:0_20:4_22:5 M+NH4 Atlas --- TG 11:0_20:5_22:4 M+NH4 A…	Lipids and lipid-like molecules	Glycerolipids	Triradylcglycerols	HMDB0043681	TG(15:0/18:4(6Z,9Z,12Z,15Z)/20:5(5Z,8Z,11Z,14Z,17Z))	Glycerolipids [GL]	Triradylglycerols [GL03]	Triacylglycerols [GL0301]	LMGL03013010 --- LMGL03014000 --- LMGL03014015 --- LMGL03014746 --- LMGL03015227 --- LMGL03015562 --- LMGL03016093	TG(13:0/18:3(9Z,12Z,15Z)/22:6(4Z,7Z,10Z,13Z,16Z,19Z))[iso6] --- TG(13:0/18:4(6Z,9Z,12Z,15Z)/22:5(7Z,10Z,13Z,16Z,19Z))[iso6] --- TG(14:1(9Z)/17:2(9Z,12Z)/22:6(4Z,7Z,10Z,13Z,16Z,19Z))[iso6] --- TG(15:0/18:4(6Z,9Z,12Z,15Z)/20:5(5Z,8Z,11Z,14Z,17Z))[iso6] --- TG(15:1(9Z)/18:3(9Z,12Z,15Z)/20:5(5Z,8Z,11Z,14Z,17Z))[iso6] --- TG(17:1(9Z)/18:4(6Z,9Z,12Z,15Z)/18:4(6Z,9Z,12Z,15Z))[iso3] --- TG(17:2(9Z,12Z)/1…	TG 53:9	TG 13:0_18:3_22:6 --- TG 13:0_18:4_22:5 --- TG 14:1_17:2_22:6 --- TG 15:0_18:4_20:5 --- TG 15:1_18:3_20:5 --- TG 17:1_18:4_18:4 --- TG 17:2_18:3_18:4	AGMOSFLDTWOZKG-JAUUBXJONA-N, ANJMBAFAEGSLOB-KUCOBKKINA-N, AZSCFEZUSBGWJA-JNTVCBAINA-N, BHPRDHPGJGUKNN-XYWIMTPHNA-N, BXGFFDXBRBDCBP-YEZXMMANNA-N, CBADSBHOQYLYDB-DWVYNEJFNA-N, CDPUGBIDPHJKCC-QVMZBENRNA-N, CDXYHNDBWIZRMQ-AGVFXMICNA-N, CNLUDDYSSFBGTQ-NIKIUKNRNA-N, CXPUADHKGMCRHP-FNCJLJBQNA-N, DAAGXYXVECIIMA-ZELULIAWNA-N, DBFZUDORAPUHGF-QYVATBQJNA-N, DJQQTJPAWBZBSZ-VYUPEIDGNA-N, DSRKPEHAZZBLLY-MOCBDAJ…	C56H90O6	1	M+NH4	876.708		10.34	10.31	95.6989	4.43666	100	100	0.846111	8.4115e-16	1.02339e-14	0.626445	3.89829e-05	0.000375882	0.962519	0.000599304	0.00563736	0.381366	0.00138891	0.00685365	0.403017	7.43828e-12	7.91858e-11
DAG 36:4	DAG	RP_PosMSMS_559		Y	GL	DG 18:2_18:2 M+NH4 Atlas	Lipids and lipid-like molecules	Fatty Acyls	Lineolic acids and derivatives	HMDB0007248	DG(18:2(9Z,12Z)/18:2(9Z,12Z)/0:0)	Glycerolipids [GL]	Diradylglycerols [GL02]	Diacylglycerols [GL0201]	LMGL02010063	DG(18:2(9Z,12Z)/18:2(9Z,12Z)/0:0)	DG 36:4	DG 18:2_18:2	MQGBAQLIFKSMEM-MAZCIEHSNA-N	C39H68O5	1	M+NH4	634.537		6.84	6.84	68.0108	23.3831	100	100	0.838285	1.98059e-15	2.36149e-14	0.651846	1.70568e-05	0.000219735	1.22468	7.87784e-06	0.000270467	0.426531	0.000312631	0.0022947	0.419185	5.03676e-13	7.2936e-12
TAG 51:1	TAG	RP_PosMSMS_1236, 1252		Y	GL	TG 16:0_17:0_18:1 M+NH4 Atlas, TG 16:0_17:0_18:1 M+Na Atlas						Glycerolipids [GL]	Triradylglycerols [GL03]	Triacylglycerols [GL0301]	LMGL03010051	TG(16:0/17:0/18:1(9Z))[iso6]	TG 51:1	TG 16:0_17:0_18:1	RHDRMOUSDQDVCE-RFBIWTDZNA-N	C54H102O6	2, 1	M+NH4, M+Na	864.7951, 869.751	565.51	11.235	11.21	80.6452	3.40664	95.8678	100	0.82132	2.37132e-15	2.77194e-14	0.636427	1.91614e-05	0.000232658	0.962874	0.000459365	0.00501812	0.452152	8.92179e-05	0.00092178	0.397698	5.20902e-12	5.75076e-11
TAG 50:5	TAG	RP_PosMSMS_1162		Y	GL	TG 14:0_18:2_18:3 M+NH4 Atlas	Lipids and lipid-like molecules	Glycerolipids	Triradylcglycerols	HMDB0042534	TG(14:0/18:2(9Z,12Z)/18:3(9Z,12Z,15Z))	Glycerolipids [GL]	Triradylglycerols [GL03]	Triacylglycerols [GL0301]	LMGL03014383	TG(14:0/18:2(9Z,12Z)/18:3(9Z,12Z,15Z))[iso6]	TG 50:5	TG 14:0_18:2_18:3	BVZCCLFFAYZNFZ-ZBLLSRFYNA-N	C53H92O6	1	M+NH4	842.718		10	9.99	73.3871	4.52024	100	100	0.844985	3.19524e-15	3.66321e-14	0.590695	0.000142678	0.00108779	1.02741	0.000282289	0.00357063	0.365063	0.00259784	0.0109149	0.399878	2.62399e-11	2.52309e-10
TAG 46:2	TAG	RP_PosMSMS_996		Y	GL	TG 12:0_12:0_22:2 M+NH4 Atlas --- TG 12:0_16:0_18:2 M+NH4 Atlas --- TG 12:0_16:1_18:1 M+NH4 Atlas --- TG 14:0_16:1_16:1 M+NH4 Atlas --- TG 14:1_16:0_16:1 M+NH4 Atlas	Lipids and lipid-like molecules	Glycerolipids	Triradylcglycerols	HMDB0042309, HMDB0047771	TG(14:0/16:1(9Z)/16:1(9Z)) --- TG(14:1(9Z)/16:0/16:1(9Z))	Glycerolipids [GL]	Triradylglycerols [GL03]	Triacylglycerols [GL0301]	LMGL03012654 --- LMGL03012787 --- LMGL03013327 --- LMGL03013351 --- LMGL03014627	TG(12:0/12:0/22:2(13Z,16Z))[iso3] --- TG(12:0/16:0/18:2(9Z,12Z))[iso6] --- TG(12:0/16:1(9Z)/18:1(9Z))[iso6] --- TG(14:0/16:1(9Z)/16:1(9Z))[iso3] --- TG(14:1(9Z)/16:0/16:1(9Z))[iso6]	TG 46:2	TG 12:0_12:0_22:2 --- TG 12:0_16:0_18:2 --- TG 12:0_16:1_18:1 --- TG 14:0_16:1_16:1 --- TG 14:1_16:0_16:1	JORMHQSOEAESEA-FRIQFDFRNA-N, MIEULIUWCBAVBF-ZMPCKTLKNA-N, XUEMVUXNOCIHLG-IKJQKJQYNA-N, XYYRUMPXVOZUGQ-PAFQGHGSNA-N, YSIRRKPRSAWHFR-BLWADTQWNA-N	C49H90O6	1	M+NH4	792.702		10.09	10.05	88.7097	5.90181	100	100	0.836311	3.28118e-15	3.69077e-14	0.594385	0.000108203	0.000886817	0.994423	0.000394583	0.00444698	0.414676	0.000491373	0.00329786	0.39629	2.47077e-11	2.45496e-10
TAG 59:1	TAG	RP_PosMSMS_1493		Y	GL	TG 16:0_18:1_25:0 M+NH4 Atlas													YSRIACJWFZBSML-CLIDGEQKNA-N	C62H118O6	1	M+NH4	976.92		12.26	12.3	17.4731	17.1279	22.314	100	0.813023	3.39877e-15	3.75224e-14	0.685984	2.82544e-06	5.146e-05	1.1391	2.26648e-05	0.000510657	0.46559	4.62103e-05	0.000582461	0.413395	2.24972e-13	3.43895e-12
DAG 33:1	DAG	RP_PosMS1_504		Y	GL	Cer 10:0;3O/26:1;(2OH) M+H Atlas --- Cer 11:0;3O/25:1;(2OH) M+H Atlas --- Cer 12:0;3O/24:1;(2OH) M+H Atlas --- Cer 12:1;3O/24:0;(2OH) M+H Atlas --- Cer 13:0;3O/23:1;(2OH) M+H Atlas --- Cer 13:1;3O/23:0;(2OH) M+H Atlas --- Cer 14:0;3O/22:1;(2OH) M+H Atlas --- Cer 14:1;3O/22:0;(2OH) M+H Atlas --- Cer 15:0;3O/21:1;(2OH) M+H Atlas --- Cer 15:1;3O/21:0;(2OH) M+H Atlas --- Cer 16:0;3O/20:1;(2OH) M+H At…	Lipids and lipid-like molecules	Glycerolipids	Diradylglycerols	HMDB0007073	DG(15:0/18:1(9Z)/0:0)	Glycerolipids [GL]	Diradylglycerols [GL02]	Diacylglycerols [GL0201]	LMGL02010014 --- LMGL02010365 --- LMGL02010432	DG(13:0/20:1(11Z)/0:0)[iso2] --- DG(15:0/18:1(9Z)/0:0)[iso2] --- DG(16:0/17:1(9Z)/0:0)[iso2]	DG 33:1	DG 13:0_20:1 --- DG 15:0_18:1 --- DG 16:0_17:1	AGZNDGFIVFESDX-SQFISAMPNA-N, AOZFDUMPKUDANG-OWBHPGMINA-N, CNVMYUWURZZCCS-ICFOKQHNNA-N, CRSAVOISIVWBTH-XTQSDGFTNA-N, DAMVTUKUHWPMTO-XTQSDGFTNA-N, DDTVGAHYSFONAY-BENRWUELNA-N, DISOPTBQYQYQDC-NTMALXAHNA-N, DJKDYVZXWQKRJI-MSUUIHNZNA-N, DRKQYALGDZTBMP-GHVJWSGMNA-N, DTIQOPZXSHYLFW-HNENSFHCNA-N, GIJPXIULPPSHJA-HNENSFHCNA-N, GWAPRYUVSHVZHN-ZCXUNETKNA-N, JAAANOKYDFNFIW-GHVJWSGMNA-N, JWEAJQTXONIOSM-XTQSDGF…	C36H68O5	1	M+H --- M+NH4	598.537		7.34	7.29	22.8495	27.6872	68.595	96.9388	0.837376	4.07039e-15	4.33322e-14	0.686991	5.99181e-06	9.82164e-05	1.11126	6.8319e-05	0.00120324	0.488972	3.2745e-05	0.000497711	0.419054	8.3404e-13	1.08092e-11
TAG 48:4	TAG	RP_PosMSMS_1081		Y	GL	TG 12:0_18:2_18:2 M+NH4 Atlas						Glycerolipids [GL]	Triradylglycerols [GL03]	Triacylglycerols [GL0301]	LMGL03012671	TG(12:0/18:2(9Z,12Z)/18:2(9Z,12Z))[iso3]	TG 48:4	TG 12:0_18:2_18:2	QYGNVKAJARKXER-BHNJGKJNNA-N	C51H90O6	1	M+NH4	816.702		9.88	9.83	43.5484	4.75555	95.0413	100	0.84175	4.05945e-15	4.33322e-14	0.578371	0.000197392	0.00140679	1.01012	0.000357132	0.0042211	0.374393	0.0019551	0.00918519	0.395872	4.39702e-11	3.74475e-10
TAG 51:2	TAG	RP_PosMSMS_1226, 1244		Y	GL	TG 16:0_17:1_18:1 M+NH4 Atlas, TG 16:0_17:1_18:1 M+Na Atlas						Glycerolipids [GL]	Triradylglycerols [GL03]	Triacylglycerols [GL0301]	LMGL03010061	TG(16:0/17:1(9Z)/18:1(9Z))[iso6]	TG 51:2	TG 16:0_17:1_18:1	QLIUVBJPQMDRHV-IFNXDHGUNA-N	C54H100O6	2, 1	M+NH4, M+Na	862.7797, 867.735	265.247	10.99	10.92	95.1613	3.69842	99.1736	100	0.833289	4.63672e-15	4.84952e-14	0.614847	5.90027e-05	0.00052995	0.940243	0.000847738	0.00761275	0.475504	5.27905e-05	0.000620032	0.396131	2.55629e-11	2.49829e-10
TAG 50:1	TAG	RP_PosMSMS_1129, 1182, 1199		Y	GL	1,2-Dihexadecanoyl-3-(9Z-octadecenoyl)-sn-glycerol M+H NIST, TG 16:0_16:0_18:1 M+NH4 Atlas, TG 16:0_16:0_18:1 M+Na Atlas	Lipids and lipid-like molecules	Glycerolipids	Triradylcglycerols	HMDB0005360, HMDB0031119	TG(16:0/16:0/18:1(9Z)) --- Glycerol 1,2-dihexadecanoate 3-(9Z-octadecenoate)	Glycerolipids [GL]	Triradylglycerols [GL03]	Triacylglycerols [GL0301]	LMGL03010006	TG(16:0/16:0/18:1(9Z))	TG 50:1	TG 16:0_16:0_18:1	YHMDGPZOSGBQRH-YYSBDVFPSA-N, YHMDGPZOSGBQRH-QPLCGJKRNA-N	C53H100O6	1	M+H, M+NH4, M+Na	833.7529, 850.7797, 855.7349		11.08	11.05	98.3871	5.22001	99.1736	100	0.818408	5.5529e-15	5.70761e-14	0.658055	1.04111e-05	0.000148396	0.922208	0.000884757	0.00761275	0.486701	2.41921e-05	0.000384746	0.398495	6.62762e-12	7.18386e-11
TAG 49:8	TAG	RP_PosMS1_1097		Y	GL	SL 23:2;O/26:2;O M+H Atlas --- SL 23:3;O/26:1;O M+H Atlas --- SL 24:3;O/25:1;O M+H Atlas --- SL 25:2;O/24:2;O M+H Atlas --- SL 25:3;O/24:1;O M+H Atlas --- SL 26:3;O/23:1;O M+H Atlas --- TG 10:0_13:1_26:7 M+NH4 Atlas --- TG 10:0_17:2_22:6 M+NH4 Atlas --- TG 11:0_16:2_22:6 M+NH4 Atlas --- TG 11:0_16:3_22:5 M+NH4 Atlas --- TG 11:0_16:4_22:4 M+NH4 Atlas --- TG 11:0_18:3_20:5 M+NH4 Atlas --- TG 11:0_1…						Glycerolipids [GL]	Triradylglycerols [GL03]	Triacylglycerols [GL0301]	LMGL03012736	TG(13:0/18:4(6Z,9Z,12Z,15Z)/18:4(6Z,9Z,12Z,15Z))[iso3]	TG 49:8	TG 13:0_18:4_18:4	AIULRAVKGDYQHV-BWIFZGEKNA-N, AJDFVZMOWSTERS-UVEDHLBXNA-N, ARQCSGXEUJDSSW-JIAAKFCQNA-N, BLZYQCSCXRGNHR-XVWVPVEBNA-N, CHQSHBJBTYYZTB-FHJPHEAZNA-N, DKSCDAJSNGCYTM-HXTXELTENA-N, DMVBTKNGKZNNCU-HZZPUICXNA-N, DVXNJKGQXISRTD-RNRVHAHJNA-N, FZINEMPNJWACSN-QKKHMSHZNA-N, HASWPLMPPKMINL-ZLSAPULVNA-N, HBHQKNSPWUYCQC-WYRGJYFKNA-N, IFSLIJNONPKLMH-ZSMVWCOHNA-N, IMGIDJWIZFDEHG-RSCJFFPONA-N, IPACIXWERHMXMA-QGVLKJD…	C52H84O6	1	M+H --- M+NH4	822.662		9.89	9.86	72.8495	3.95407	100	100	0.834956	7.66248e-15	7.74248e-14	0.570762	0.000239329	0.0016518	0.984509	0.000507906	0.00521107	0.372248	0.00205927	0.00950181	0.391232	8.07928e-11	6.42206e-10
TAG 49:4	TAG	RP_PosMSMS_1138		Y	GL	TG 10:0_11:0_28:4 M+Na Atlas --- TG 10:0_13:0_26:4 M+Na Atlas --- TG 10:0_13:1_26:3 M+Na Atlas --- TG 10:0_15:0_24:4 M+Na Atlas --- TG 10:0_15:1_24:3 M+Na Atlas --- TG 10:0_16:4_23:0 M+Na Atlas --- TG 10:0_17:0_22:4 M+Na Atlas --- TG 10:0_17:1_22:3 M+Na Atlas --- TG 10:0_17:2_22:2 M+Na Atlas --- TG 10:0_18:2_21:2 M+Na Atlas --- TG 10:0_18:3_21:1 M+Na Atlas --- TG 10:0_18:4_21:0 M+Na Atlas --- TG …	Lipids and lipid-like molecules	Glycerolipids	Triradylcglycerols	HMDB0042116, HMDB0043041, HMDB0043214	TG(14:0/15:0/20:4(8Z,11Z,14Z,17Z)) --- TG(15:0/16:0/18:4(6Z,9Z,12Z,15Z)) --- TG(15:0/16:1(9Z)/18:3(9Z,12Z,15Z))	Glycerolipids [GL]	Triradylglycerols [GL03]	Triacylglycerols [GL0301]	LMGL03010035 --- LMGL03012733 --- LMGL03012904 --- LMGL03013318 --- LMGL03013429 --- LMGL03013521 --- LMGL03013536 --- LMGL03013727 --- LMGL03013910 --- LMGL03013929 --- LMGL03014279 --- LMGL03014301 --- LMGL03014321 --- LMGL03014615 --- LMGL03014684 --- LMGL03014705 --- LMGL03014726 --- LMGL03015014 --- LMGL03015038 --- LMGL03015364 --- LMGL03015387 --- LMGL03015431	TG(12:0/15:1(9Z)/22:3(10Z,13Z,16Z))[iso6] --- TG(12:0/17:2(9Z,12Z)/20:2(11Z,14Z))[iso6] --- TG(12:0/18:3(9Z,12Z,15Z)/19:1(9Z))[iso6] --- TG(12:0/18:4(6Z,9Z,12Z,15Z)/19:0)[iso6] --- TG(13:0/14:1(9Z)/22:3(10Z,13Z,16Z))[iso6] --- TG(13:0/18:0/18:4(6Z,9Z,12Z,15Z))[iso6] --- TG(13:0/18:1(9Z)/18:3(9Z,12Z,15Z))[iso6] --- TG(13:0/18:2(9Z,12Z)/18:2(9Z,12Z))[iso3] --- TG(14:0/17:0/18:4(6Z,9Z,12Z,15Z))[iso6…	TG 49:4	TG 12:0_15:1_22:3 --- TG 12:0_17:2_20:2 --- TG 12:0_18:3_19:1 --- TG 12:0_18:4_19:0 --- TG 13:0_14:1_22:3 --- TG 13:0_18:0_18:4 --- TG 13:0_18:1_18:3 --- TG 13:0_18:2_18:2 --- TG 14:0_17:0_18:4 --- TG 14:0_17:1_18:3 --- TG 14:0_17:2_18:2 --- TG 14:1_15:1_20:2 --- TG 14:1_17:0_18:3 --- TG 14:1_17:1_18:2 --- TG 14:1_17:2_18:1 --- TG 15:0_16:0_18:4 --- TG 15:0_16:1_18:3 --- TG 15:0_17:2_17:2 --- TG …	AESJJSXQLQHEBP-RFWOPXHNNA-N, ARDVTRAPTXYLFE-UPWYTWOYNA-N, AVTOCQWXHJVDFS-NBKYDHCHNA-N, AXMBZOOUHGEOLO-WIJCIVSENA-N, BCJXZZQLKXOBHX-KCEVUTCSNA-N, BGCDESMHBOGEAW-DKSIPLKENA-N, BJILSCTYCQWNLV-HPTPKDNANA-N, BKRHAMBZZKKNDU-PAJBAMARNA-N, BNNWTQCUDNZFTO-KRUWQHIMNA-N, BQELABAKLKGPKA-RGYBQKTINA-N, BSNIISAHPKGDDL-GMZRDVTMNA-N, BUJMZWBDNCUXKX-BXRBPIJNNA-N, BUMYDPNUJJWRSF-TXKUKGRYNA-N, BVDJODWQTFSOLM-DZJPTJE…	C52H92O6	1	M+Na	835.675		10.12	10.02	14.7849	8.36992	29.7521	100	0.819675	8.45133e-15	8.39724e-14	0.569673	0.000187424	0.00135042	1.06799	0.000109612	0.00169828	0.328591	0.00590703	0.0199521	0.391114	3.05115e-11	2.79842e-10
TAG 46:3	TAG	RP_PosMSMS_990, 1009		Y	GL	TG 12:0_16:1_18:2 M+NH4 Atlas, TG 12:0_12:0_22:3 M+Na Atlas --- TG 12:0_16:1_18:2 M+Na Atlas --- TG 14:0_14:0_18:3 M+Na Atlas	Lipids and lipid-like molecules	Glycerolipids	Triradylcglycerols	HMDB0042084	TG(14:0/14:0/18:3(9Z,12Z,15Z))	Glycerolipids [GL]	Triradylglycerols [GL03]	Triacylglycerols [GL0301]	LMGL03013352, LMGL03012655 --- LMGL03012765 --- LMGL03013352	TG(12:0/16:1(9Z)/18:2(9Z,12Z))[iso6], TG(12:0/12:0/22:3(10Z,13Z,16Z))[iso3] --- TG(12:0/16:1(9Z)/18:2(9Z,12Z))[iso6] --- TG(14:0/14:0/18:3(9Z,12Z,15Z))[iso3]	TG 46:3	TG 12:0_16:1_18:2, TG 12:0_12:0_22:3 --- TG 12:0_16:1_18:2 --- TG 14:0_14:0_18:3	YCZHBUHPOJGNKX-QGHPQDBUNA-N, AQARPXOEHQBBQN-SVOFSQQFNA-N, BEPUMTHCZRRVQV-CRCXHREWNA-N, YCZHBUHPOJGNKX-QGHPQDBUNA-N	C49H88O6	1	M+NH4, M+Na	790.6877, 795.6428		9.785	9.745	72.3118	2.76345	100	100	0.828265	1.17838e-14	1.15164e-13	0.57864	0.000183268	0.00135015	0.980701	0.000513167	0.00521107	0.392877	0.00106141	0.00596218	0.390498	7.5342e-11	6.15286e-10
TAG O-56:2	TAG-O	RP_PosMS1_1393		Y	GL	TG O-12:0_22:0_22:2 M+Na Atlas --- TG O-12:0_22:1_22:1 M+Na Atlas --- TG O-14:0_20:0_22:2 M+Na Atlas --- TG O-14:0_20:1_22:1 M+Na Atlas --- TG O-14:0_20:2_22:0 M+Na Atlas --- TG O-14:1_20:0_22:1 M+Na Atlas --- TG O-14:1_20:1_22:0 M+Na Atlas --- TG O-16:0_18:0_22:2 M+Na Atlas --- TG O-16:0_18:1_22:1 M+Na Atlas --- TG O-16:0_18:2_22:0 M+Na Atlas --- TG O-16:0_20:0_20:2 M+Na Atlas --- TG O-16:0_20:1…	Lipids and lipid-like molecules	Glycerolipids	Triradylcglycerols	HMDB0045892, HMDB0050508, HMDB0051560, HMDB0053315, HMDB0054370	TG(20:0/18:2(9Z,12Z)/O-18:0) --- TG(20:1(11Z)/18:1(9Z)/O-18:0) --- TG(22:1(13Z)/16:1(9Z)/O-18:0) --- TG(20:2n6/18:0/O-18:0) --- TG(22:2(13Z,16Z)/16:0/O-18:0)								ABSRVGFBFXCQQQ-KWYCXWARNA-N, AEZQVRQUYOLJCS-NAMCCYITNA-N, BDCSDBVNZGJCKJ-OXQPSHBUNA-N, BPRREWCNMINHAG-LBXGSASVNA-N, CNFSLXGBEDOAGF-DSOYXUETNA-N, CTYDXUQBSLUGNA-RRBMBBTGNA-N, DFZWUMPLFOAMAX-OXQPSHBUNA-N, DRVVRWBANXIQND-HBLVUIEFNA-N, FEQGTAIRRDJZLL-LPUXYYICNA-N, FMXZQUNYDWFSOP-KDGQPXOJNA-N, GRWAFFDXKWCYFG-LVBVOWIENA-N, HFKRCXNHVLLWOA-KWYCXWARNA-N, HWCKVFZSLJMYRW-GRGWYUSKNA-N, HZMDDXSLGXHGLR-UHVUIYC…	C59H112O5	1	M+Na	923.837		12.14	12.11	60.4839	22.2718	81.8182	100	0.784418	1.75423e-14	1.68677e-13	0.705879	7.99819e-07	1.87292e-05	1.15525	1.14714e-05	0.000318104	0.51267	3.75201e-06	0.000161583	0.409565	1.22313e-13	2.08337e-12
DAG 32:0	DAG	RP_PosMSMS_492		Y	GL	DG 16:0_16:0 M+NH4 Atlas	Lipids and lipid-like molecules	Glycerolipids	Diradylglycerols	HMDB0007098	DG(16:0/16:0/0:0)	Glycerolipids [GL]	Diradylglycerols [GL02]	Diacylglycerols [GL0201]	LMGL02010001 --- LMGL02010009	DG(16:0/16:0/0:0) --- DG(16:0/16:0/0:0)[rac]	DG 32:0	DG 16:0_16:0	JEJLGIQLPYYGEE-UHFFFAOYNA-N	C35H68O5	2	M+NH4	586.537	313.271	7.55	7.51	99.1935	15.1631	100	100	0.81381	2.30067e-14	2.17709e-13	0.682246	5.73366e-06	9.76902e-05	1.23834	5.75978e-06	0.000254724	0.446576	0.000146624	0.00135309	0.418246	5.11121e-13	7.2936e-12
22:0-Glc-Cholesterol --- 20:0-Glc-Sitosterol	ST - Sterols	RP_PosMS1_1300		Y	nonGL	DGTS 19:1_26:2 M+H Atlas --- DGTS 21:1_24:2 M+H Atlas --- DGTS 23:0_22:3 M+H Atlas --- DGTS 24:1_21:2 M+H Atlas --- DGTS 25:0_20:3 M+H Atlas --- DGTS 26:1_19:2 M+H Atlas --- DGTS 27:0_18:3 M+H Atlas --- ST 27:1;O;Hex;FA 22:0 M+NH4 Atlas --- ST 28:1;O;Hex;FA 21:0 M+NH4 Atlas --- ST 29:1;O;Hex;FA 20:0 M+NH4 Atlas						Sterols [ST]	Sterols [ST01]	Cholesterol and derivatives [ST0101] --- Stigmasterols and C24-ethyl derivatives [ST0104]	LMST01010370 --- LMST01040208	20:0-Glc-Sitosterol --- 22:0-Glc-Cholesterol			BSVRJCILFNMFMQ-XBLGAFKDNA-N, IALSMCKIVNTXHI-XDZFUVEGNA-N, IRDJWBNBJLFBFN-UHFFFAOYNA-N, NVDTXJPPHULIAQ-UHFFFAOYNA-N, OPSHGHJDUDIEJZ-IIRWCJMTNA-N, QTHRAWOQRBKLOO-OTZAENATNA-N, TXFNGAZZISRWSA-UHFFFAOYNA-N, UQBDGHNVJMRSHT-HCXHDQOBNA-N, VAPSLKMDDXQAJX-OCNVGBQJNA-N, ZVEVCMUDIXWEEY-OTZXFMSTNA-N	C55H98O7	1	M+H --- M+NH4	888.761		10.23	10.18	59.9462	14.7991	98.3471	100	0.809852	3.13848e-14	2.92349e-13	0.517575	0.000786748	0.00419388	0.915922	0.00108597	0.00818548	0.512382	9.69285e-06	0.000236514	0.371076	6.15102e-10	4.26395e-09
TAG 53:4	TAG	RP_PosMSMS_1297, 1313		Y	GL	TG 17:1_18:1_18:2 M+NH4 Atlas, TG 17:1_18:1_18:2 M+Na Atlas --- TG 17:2_18:1_18:1 M+Na Atlas						Glycerolipids [GL]	Triradylglycerols [GL03]	Triacylglycerols [GL0301]	LMGL03010190, LMGL03010187 --- LMGL03010190	TG(17:1(9Z)/18:1(9Z)/18:2(9Z,12Z))[iso6], TG(17:1(9Z)/18:1(9Z)/18:2(9Z,12Z))[iso6] --- TG(17:2(9Z,12Z)/18:1(9Z)/18:1(9Z))[iso3]	TG 53:4	TG 17:1_18:1_18:2, TG 17:1_18:1_18:2 --- TG 17:2_18:1_18:1	VESVDAJIPQIOEH-SWVQGCAJNA-N, BMSDHYZLQWTKSQ-UANKMODMNA-N, VESVDAJIPQIOEH-SWVQGCAJNA-N	C56H100O6	1	M+NH4, M+Na	886.7801, 891.7357		10.74	10.715	84.4086	3.38182	99.1736	100	0.802651	3.64258e-14	3.34087e-13	0.573995	0.000155647	0.00117303	0.960958	0.000529554	0.0053028	0.363098	0.00214366	0.00969483	0.381309	1.03495e-10	8.11834e-10
TAG 54:3	TAG	RP_PosMSMS_1339, 1351		Y	GL	TG 18:1_18:1_18:1 M+NH4 Atlas, TG 18:0_18:1_18:2 M+Na Atlas --- TG 18:1_18:1_18:1 M+Na Atlas	Lipids and lipid-like molecules	Glycerolipids	Triradylcglycerols	HMDB0005453	TG(18:1(9Z)/18:1(9Z)/18:1(9Z))	Glycerolipids [GL]	Triradylglycerols [GL03]	Triacylglycerols [GL0301]	LMGL03010250	TG(18:1(9Z)/18:1(9Z)/18:1(9Z))	TG 54:3	TG 18:1_18:1_18:1	PHYFQTYBJUILEZ-IUPFWZBJSA-N, CNGSOZKJBWHOEG-VBOJLMESNA-N, PHYFQTYBJUILEZ-IUPFWZBJSA-N	C57H104O6	2, 1	M+NH4, M+Na	902.8101, 907.7662	339.283	11.17	11.13	95.4301	7.4942	95.8678	100	0.780123	5.00805e-14	4.52364e-13	0.618889	2.4437e-05	0.000276252	0.868421	0.00140642	0.00947673	0.414171	0.000287778	0.0022197	0.377817	4.36732e-11	3.74475e-10
TAG 50:3	TAG	RP_PosMSMS_1170, 1184		Y	GL	TG 16:0_16:1_18:2 M+NH4 Atlas --- TG 16:1_16:1_18:1 M+NH4 Atlas, TG 16:0_16:1_18:2 M+Na Atlas	Lipids and lipid-like molecules	Glycerolipids	Triradylcglycerols	HMDB0005379, HMDB0005433	TG(16:0/16:1(9Z)/18:2(9Z,12Z)) --- TG(16:1(9Z)/16:1(9Z)/18:1(9Z))	Glycerolipids [GL]	Triradylglycerols [GL03]	Triacylglycerols [GL0301]	LMGL03010052 --- LMGL03010053, LMGL03010053	TG(16:0/16:1(9Z)/18:2(9Z,12Z))[iso6] --- TG(16:1(9Z)/16:1(9Z)/18:1(9Z))[iso3], TG(16:0/16:1(9Z)/18:2(9Z,12Z))[iso6]	TG 50:3	TG 16:0_16:1_18:2 --- TG 16:1_16:1_18:1, TG 16:0_16:1_18:2	HDFLQJUGWGNORO-RTTOVTDCNA-N, UFHNZOACKFBCOM-ULXWNTFBNA-N, HDFLQJUGWGNORO-RTTOVTDCNA-N	C53H96O6	1	M+NH4, M+Na	846.7488, 851.7042		10.54	10.47	98.1183	2.03957	99.1736	100	0.800165	5.79292e-14	5.15449e-13	0.667294	8.47705e-06	0.000128873	0.931974	0.00082454	0.00752509	0.435919	0.000198091	0.00170618	0.395419	1.47026e-11	1.51122e-10
22:1-Glc-Stigmasterol --- 22:2-Glc-Sitosterol	ST - Sterols	RP_PosMS1_1364		Y	nonGL	DGTS 21:1_26:4 M+H Atlas --- DGTS 25:0_22:5 M+H Atlas --- DGTS 27:0_20:5 M+H Atlas --- ST 27:1;O;Hex;FA 24:2 M+NH4 Atlas --- ST 29:1;O;Hex;FA 22:2 M+NH4 Atlas --- ST 29:2;O;Hex;FA 22:1 M+NH4 Atlas						Sterols [ST]	Sterols [ST01]	Stigmasterols and C24-ethyl derivatives [ST0104]	LMST01040224 --- LMST01040234	22:1-Glc-Stigmasterol --- 22:2-Glc-Sitosterol			CNJXKGNFCLQONJ-RMJBQFIFNA-N, FALPSZPQJFHEON-VEIWDTMFNA-N, GYZNBUCGTPBPSE-AUGURXLVNA-N, HPLFUKZIJDINKH-GZMUDWLKNA-N, IBACDPKUXRHCCC-XRNBTWNWNA-N, IFSFJPPKUNXRBP-AUGURXLVNA-N	C57H98O7	1	M+H --- M+NH4	912.759		10.02	10.02	52.1505	25.8572	75.2066	100	0.792689	6.03549e-14	5.29135e-13	0.632926	2.2415e-05	0.000262444	0.917576	0.000898106	0.0076179	0.48758	2.14897e-05	0.000381686	0.386487	3.38438e-11	3.01139e-10
TAG O-50:2	TAG-O	RP_PosMS1_1151		Y	GL	TG O-10:0_18:0_22:2 M+Na Atlas --- TG O-10:0_18:1_22:1 M+Na Atlas --- TG O-10:0_18:2_22:0 M+Na Atlas --- TG O-10:0_20:0_20:2 M+Na Atlas --- TG O-10:0_20:1_20:1 M+Na Atlas --- TG O-12:0_16:0_22:2 M+Na Atlas --- TG O-12:0_16:1_22:1 M+Na Atlas --- TG O-12:0_16:2_22:0 M+Na Atlas --- TG O-12:0_18:0_20:2 M+Na Atlas --- TG O-12:0_18:1_20:1 M+Na Atlas --- TG O-12:0_18:2_20:0 M+Na Atlas --- TG O-14:0_14:0…	Lipids and lipid-like molecules	Glycerolipids --- Fatty Acyls	Triradylcglycerols --- Lineolic acids and derivatives	HMDB0048610, HMDB0049860, HMDB0052410	TG(16:1(9Z)/16:1(9Z)/O-18:0) --- TG(18:1(9Z)/14:1(9Z)/O-18:0) --- TG(18:2(9Z,12Z)/14:0/O-18:0)								ALEPGJFUJLLKPY-MYSACRKYNA-N, BIGPRHAPWIYJJT-MYSACRKYNA-N, BJGDPDQYTDDNGQ-SXAUZNKPNA-N, BUTRUJVANHWKDB-SKZTXPNNNA-N, BUVXHQOGQWQADJ-YPAXQUSRNA-N, CBIXYGLVXFZULT-HBLVUIEFNA-N, COPILEORYXAOGS-DSOYXUETNA-N, CSTLUGJDUBXLFZ-CUVTVMEMNA-N, CVCMPTPONVOCRS-LLMCKSEUNA-N, DGUDJBPAIBRSKW-IUFKAHDJNA-N, DKXHTCKQRBDJSW-XCUCQOFMNA-N, FCHJSFLLEVDZGP-MYSACRKYNA-N, FSNNOVOORDUDBL-LBXGSASVNA-N, FZZUMRFYJKZWIR-JXAXBCJ…	C53H100O5	1	M+Na	839.746		10.9	10.82	55.6452	21.8981	96.6942	100	0.804637	6.63117e-14	5.72933e-13	0.655385	1.50004e-05	0.000200721	0.898896	0.00140525	0.00947673	0.383956	0.00126936	0.00669378	0.392849	3.34647e-11	3.01139e-10
TAG 55:8	TAG	RP_PosMS1_1347		Y	GL	TG 10:0_11:0_34:8 M+NH4 Atlas --- TG 10:0_13:0_32:8 M+NH4 Atlas --- TG 10:0_13:1_32:7 M+NH4 Atlas --- TG 10:0_15:0_30:8 M+NH4 Atlas --- TG 10:0_15:1_30:7 M+NH4 Atlas --- TG 10:0_17:1_28:7 M+NH4 Atlas --- TG 10:0_17:2_28:6 M+NH4 Atlas --- TG 10:0_19:1_26:7 M+NH4 Atlas --- TG 10:0_19:2_26:6 M+NH4 Atlas --- TG 10:0_21:2_24:6 M+NH4 Atlas --- TG 11:0_12:0_32:8 M+NH4 Atlas --- TG 11:0_14:0_30:8 M+NH4 A…	Lipids and lipid-like molecules	Glycerolipids	Triradylcglycerols	HMDB0043422, HMDB0043653, HMDB0043709	TG(15:0/18:2(9Z,12Z)/22:6(4Z,7Z,10Z,13Z,16Z,19Z)) --- TG(15:0/18:3(9Z,12Z,15Z)/22:5(7Z,10Z,13Z,16Z,19Z)) --- TG(15:0/20:4(8Z,11Z,14Z,17Z)/20:4(8Z,11Z,14Z,17Z))	Glycerolipids [GL]	Triradylglycerols [GL03]	Triacylglycerols [GL0301]	LMGL03010618 --- LMGL03010619 --- LMGL03010620 --- LMGL03010780 --- LMGL03010782 --- LMGL03010783 --- LMGL03013087 --- LMGL03014081 --- LMGL03014105 --- LMGL03014886 --- LMGL03015184 --- LMGL03015218 --- LMGL03015516 --- LMGL03015534 --- LMGL03015583 --- LMGL03015643 --- LMGL03016100 --- LMGL03016509	TG(13:0/20:2(11Z,14Z)/22:6(4Z,7Z,10Z,13Z,16Z,19Z))[iso6] --- TG(13:0/20:5(5Z,8Z,11Z,14Z,17Z)/22:3(10Z,13Z,16Z))[iso6] --- TG(14:1(9Z)/19:1(9Z)/22:6(4Z,7Z,10Z,13Z,16Z,19Z))[iso6] --- TG(15:0/18:2(9Z,12Z)/22:6(4Z,7Z,10Z,13Z,16Z,19Z))[iso6] --- TG(15:0/18:3(9Z,12Z,15Z)/22:5(7Z,10Z,13Z,16Z,19Z))[iso6] --- TG(15:1(9Z)/18:1(9Z)/22:6(4Z,7Z,10Z,13Z,16Z,19Z))[iso6] --- TG(15:1(9Z)/18:2(9Z,12Z)/22:5(7Z,10Z…	TG 55:8	TG 13:0_20:2_22:6 --- TG 13:0_20:5_22:3 --- TG 14:1_19:1_22:6 --- TG 15:0_18:2_22:6 --- TG 15:0_18:3_22:5 --- TG 15:1_18:1_22:6 --- TG 15:1_18:2_22:5 --- TG 15:1_18:4_22:3 --- TG 15:1_20:2_20:5 --- TG 16:0_17:2_22:6 --- TG 16:1_17:1_22:6 --- TG 16:1_17:2_22:5 --- TG 17:0_18:3_20:5 --- TG 17:1_18:2_20:5 --- TG 17:2_18:1_20:5 --- TG 17:2_18:4_20:2 --- TG 18:3_18:4_19:1 --- TG 18:4_18:4_19:0	AFDYJFBGCNBYEG-FAOHWIOONA-N, AJPASYSQSXPEHF-ZRZRNRPCNA-N, AJRVVRUWAFMGPL-LUMVODSNNA-N, ANMWEJMEIVWFBI-CJDJHPQWNA-N, AVFZEXKQBPHJBM-BKODHHRQNA-N, BDWVGFVJDJXXGP-VEESLZOSNA-N, BEYNXIJKNWZAOS-WEOJKGLVNA-N, BHBQEPAKIOITSW-ZINKQYAWNA-N, BNBNLFXGRPFQAO-KPNHZLSONA-N, BQJFXVULBXLGEK-VJEPQUHJNA-N, BXWQRIWPXNFFDU-WKKORSOWNA-N, BYBLJAMZRLNIDA-YKVXATCMNA-N, BZAPMJSGGBHFRV-ZUYXXMBMNA-N, CALRAQFXNWTLAW-SIRBSTN…	C58H96O6	1	M+NH4	906.754		10.9	10.89	100	4.36011	100	100	0.766419	7.19837e-14	6.13055e-13	0.605163	2.95259e-05	0.00030729	0.891433	0.000868897	0.00761275	0.403869	0.000344167	0.00243645	0.372716	4.46289e-11	3.74732e-10
TAG 52:1	TAG	RP_PosMSMS_1275, 1288		Y	GL	TG 16:0_18:0_18:1 M+NH4 Atlas, TG 16:0_18:0_18:1 M+Na Atlas	Lipids and lipid-like molecules	Glycerolipids	Triradylcglycerols	HMDB0005367	TG(16:0/18:0/18:1(9Z))	Glycerolipids [GL]	Triradylglycerols [GL03]	Triacylglycerols [GL0301]	LMGL03010085	TG(16:0/18:0/18:1(9Z))[iso6]	TG 52:1	TG 16:0_18:0_18:1	NPCZZYKITFKRQZ-RFBIWTDZNA-N	C55H104O6	2	M+NH4, M+Na	878.8111, 883.7659	605.5467, 605.5485	11.4	11.355	91.129	10.8241	96.6942	100	0.792287	7.77974e-14	6.53235e-13	0.618472	3.78591e-05	0.000371116	0.882285	0.0014929	0.00996627	0.473446	4.12026e-05	0.000560341	0.381959	7.71131e-11	6.2124e-10
TAG 48:1	TAG	RP_PosMSMS_1098		Y	GL	TG 14:0_16:0_18:1 M+NH4 Atlas	Lipids and lipid-like molecules	Glycerolipids	Triradylcglycerols	HMDB0042131	TG(14:0/16:0/18:1(9Z))	Glycerolipids [GL]	Triradylglycerols [GL03]	Triacylglycerols [GL0301]	LMGL03014226	TG(14:0/16:0/18:1(9Z))[iso6]	TG 48:1	TG 14:0_16:0_18:1	GPXZOHHIWJNYTJ-IZHYLOQSNA-N	C51H96O6	2	M+NH4	822.749	551.501	10.76	10.73	97.5806	3.2044	100	100	0.805583	8.02843e-14	6.64754e-13	0.652682	1.77323e-05	0.000223587	0.874948	0.00198908	0.0120585	0.513755	1.05263e-05	0.000236514	0.39137	5.11063e-11	4.2316e-10
TAG 56:3	TAG	RP_PosMSMS_1410, 1418		Y	GL	TG 18:1_18:1_20:1 M+NH4 Atlas, TG 18:1_18:1_20:1 M+Na Atlas	Lipids and lipid-like molecules	Glycerolipids	Triradylcglycerols	HMDB0005454	TG(18:1(9Z)/18:1(9Z)/20:1(11Z))	Glycerolipids [GL]	Triradylglycerols [GL03]	Triacylglycerols [GL0301]	LMGL03010484	TG(18:1(9Z)/18:1(9Z)/20:1(11Z))[iso3]	TG 56:3	TG 18:1_18:1_20:1	QXMHHXQBBKDSSL-DCKNSECYNA-N	C59H108O6	1	M+NH4, M+Na	930.8416, 935.7976		11.45	11.42	77.4194	2.81459	91.7355	100	0.774093	9.39905e-14	7.67581e-13	0.655778	6.75328e-06	0.000105427	0.797802	0.00350505	0.0180208	0.350312	0.00242192	0.010344	0.378804	3.77983e-11	3.3138e-10
TAG O-56:1	TAG-O	RP_PosMS1_1397		Y	GL	TG O-12:0_22:0_22:1 M+Na Atlas --- TG O-14:0_20:0_22:1 M+Na Atlas --- TG O-14:0_20:1_22:0 M+Na Atlas --- TG O-14:1_20:0_22:0 M+Na Atlas --- TG O-16:0_18:0_22:1 M+Na Atlas --- TG O-16:0_18:1_22:0 M+Na Atlas --- TG O-16:0_20:0_20:1 M+Na Atlas --- TG O-16:1_18:0_22:0 M+Na Atlas --- TG O-16:1_20:0_20:0 M+Na Atlas --- TG O-18:0_16:0_22:1 M+Na Atlas --- TG O-18:0_16:1_22:0 M+Na Atlas --- TG O-18:0_18:0…	Lipids and lipid-like molecules	Glycerolipids	Triradylcglycerols	HMDB0045762, HMDB0046480, HMDB0050375, HMDB0051458	TG(20:0/18:1(9Z)/O-18:0) --- TG(22:0/16:1(9Z)/O-18:0) --- TG(20:1(11Z)/18:0/O-18:0) --- TG(22:1(13Z)/16:0/O-18:0)								AHKGDMREJYJJCK-RFBIWTDZNA-N, BKHQIOZWOPXQLF-FSRJSHLRNA-N, BWEBSOREABGWNB-FLFQWRMENA-N, CIFZMDHXYYGBQC-RFBIWTDZNA-N, CUMVKFBVSQBASZ-FLFQWRMENA-N, CYYFZPJFLRWJPB-FLFQWRMENA-N, DNDQJEPSXBZSNW-FVDSYPCUNA-N, DXLAMQSKKMZWNP-RFBIWTDZNA-N, FBDOHMYZBNFGKA-FSRJSHLRNA-N, FCJCIOQPWKFFFN-RFBIWTDZNA-N, GWXLPRMFNYIIKT-LCUIJRPUNA-N, HQBBCXZYICBAKQ-RFBIWTDZNA-N, LFLULLQVQPKAMK-FLFQWRMENA-N, LSQPPKVWGWHSLC-SDXDJHT…	C59H114O5	1	M+Na	925.852		12.37	12.34	52.1505	22.8005	66.1157	97.9592	0.760665	1.69384e-13	1.36459e-12	0.800697	9.11136e-09	5.97405e-06	1.17838	6.8067e-06	0.000258291	0.53908	8.9771e-07	0.000137461	0.420634	1.09033e-14	2.32147e-13
TAG 52:6	TAG	RP_PosMSMS_1247, 1262		Y	GL	TG 16:1_18:2_18:3 M+NH4 Atlas, TG 16:0_18:3_18:3 M+Na Atlas --- TG 16:1_18:2_18:3 M+Na Atlas	Lipids and lipid-like molecules	Glycerolipids	Triradylcglycerols	HMDB0048758, HMDB0044494, HMDB0048758	TG(16:0/18:3(9Z,12Z,15Z)/18:3(9Z,12Z,15Z)) --- TG(16:1(9Z)/18:2(9Z,12Z)/18:3(9Z,12Z,15Z))	Glycerolipids [GL]	Triradylglycerols [GL03]	Triacylglycerols [GL0301]	LMGL03010193, LMGL03010192 --- LMGL03010193	TG(16:1(9Z)/18:2(9Z,12Z)/18:3(9Z,12Z,15Z))[iso6], TG(16:0/18:3(9Z,12Z,15Z)/18:3(9Z,12Z,15Z))[iso3] --- TG(16:1(9Z)/18:2(9Z,12Z)/18:3(9Z,12Z,15Z))[iso6]	TG 52:6	TG 16:1_18:2_18:3, TG 16:0_18:3_18:3 --- TG 16:1_18:2_18:3	NOOJQDXMGLPOOA-SHCTYRPRNA-N, GLKWVCJIQVMKME-HTINPRBKNA-N, NOOJQDXMGLPOOA-SHCTYRPRNA-N	C55H94O6	1	M+NH4, M+Na	868.7321, 873.6891		10.095	10.065	70.1613	2.35753	99.1736	100	0.804567	1.76862e-13	1.40584e-12	0.580553	0.000186002	0.00135042	0.920732	0.00122496	0.00857457	0.318277	0.00899659	0.0268747	0.380866	3.56727e-10	2.53175e-09
TAG 44:0	TAG	RP_PosMSMS_918		Y	GL	TG 14:0_14:0_16:0 M+NH4 Atlas	Lipids and lipid-like molecules	Glycerolipids	Triradylcglycerols	HMDB0042063, HMDB0103926	TG(14:0/14:0/16:0) --- TG(16:0/14:0/14:0)	Glycerolipids [GL]	Triradylglycerols [GL03]	Triacylglycerols [GL0301]	LMGL03012756	TG(14:0/14:0/16:0)[iso3]	TG 44:0	TG 14:0_14:0_16:0	AMXRERGJDVUTMF-UHFFFAOYNA-N	C47H90O6	1	M+NH4	768.702		10.36	10.31	86.828	5.24087	99.1736	100	0.77975	2.00271e-13	1.57096e-12	0.586797	9.41104e-05	0.000781082	0.899973	0.00112682	0.00818548	0.424609	0.000255726	0.00202939	0.373761	2.03276e-10	1.54319e-09
TAG 60:9	TAG	RP_PosMS1_1500		Y	GL	TG 10:0_12:0_38:9 M+Na Atlas --- TG 10:0_14:0_36:9 M+Na Atlas --- TG 10:0_14:1_36:8 M+Na Atlas --- TG 10:0_16:0_34:9 M+Na Atlas --- TG 10:0_16:1_34:8 M+Na Atlas --- TG 10:0_16:2_34:7 M+Na Atlas --- TG 10:0_16:3_34:6 M+Na Atlas --- TG 10:0_16:4_34:5 M+Na Atlas --- TG 10:0_18:0_32:9 M+Na Atlas --- TG 10:0_18:1_32:8 M+Na Atlas --- TG 10:0_18:2_32:7 M+Na Atlas --- TG 10:0_18:3_32:6 M+Na Atlas --- TG …	Lipids and lipid-like molecules	Glycerolipids	Triradylcglycerols	HMDB0045367, HMDB0046149, HMDB0046925, HMDB0048873, HMDB0050059, HMDB0050789, HMDB0051844, HMDB0051860, HMDB0052574, HMDB0052663, HMDB0052791, HMDB0053494, HMDB0054594, HMDB0055181, HMDB0055229, HMDB0055384	TG(18:0/20:4(8Z,11Z,14Z,17Z)/22:5(7Z,10Z,13Z,16Z,19Z)) --- TG(20:0/20:4(8Z,11Z,14Z,17Z)/20:5(5Z,8Z,11Z,14Z,17Z)) --- TG(22:0/20:5(5Z,8Z,11Z,14Z,17Z)/18:4(6Z,9Z,12Z,15Z)) --- TG(16:1(9Z)/22:2(13Z,16Z)/22:6(4Z,7Z,10Z,13Z,16Z,19Z)) --- TG(18:1(9Z)/20:2n6/22:6(4Z,7Z,10Z,13Z,16Z,19Z)) --- TG(20:1(11Z)/20:4(8Z,11Z,14Z,17Z)/20:4(8Z,11Z,14Z,17Z)) --- TG(22:1(13Z)/20:4(8Z,11Z,14Z,17Z)/18:4(6Z,9Z,12Z,15Z))…	Glycerolipids [GL]	Triradylglycerols [GL03]	Triacylglycerols [GL0301]	LMGL03011627 --- LMGL03011724 --- LMGL03011786 --- LMGL03011827 --- LMGL03011828 --- LMGL03011836 --- LMGL03011837 --- LMGL03011838 --- LMGL03011872 --- LMGL03011889 --- LMGL03011899 --- LMGL03012028 --- LMGL03016594 --- LMGL03016615 --- LMGL03016639	TG(16:0/22:3(10Z,13Z,16Z)/22:6(4Z,7Z,10Z,13Z,16Z,19Z))[iso6] --- TG(16:1(9Z)/22:2(13Z,16Z)/22:6(4Z,7Z,10Z,13Z,16Z,19Z))[iso6] --- TG(16:1(9Z)/22:3(10Z,13Z,16Z)/22:5(7Z,10Z,13Z,16Z,19Z))[iso6] --- TG(18:1(9Z)/20:2(11Z,14Z)/22:6(4Z,7Z,10Z,13Z,16Z,19Z))[iso6] --- TG(18:1(9Z)/20:5(5Z,8Z,11Z,14Z,17Z)/22:3(10Z,13Z,16Z))[iso6] --- TG(18:2(9Z,12Z)/20:1(11Z)/22:6(4Z,7Z,10Z,13Z,16Z,19Z))[iso6] --- TG(18:2(…	TG 60:9	TG 16:0_22:3_22:6 --- TG 16:1_22:2_22:6 --- TG 16:1_22:3_22:5 --- TG 18:1_20:2_22:6 --- TG 18:1_20:5_22:3 --- TG 18:2_20:1_22:6 --- TG 18:2_20:2_22:5 --- TG 18:2_20:5_22:2 --- TG 18:3_20:0_22:6 --- TG 18:3_20:1_22:5 --- TG 18:3_20:5_22:1 --- TG 18:4_20:0_22:5 --- TG 18:4_20:2_22:3 --- TG 18:4_20:5_22:0 --- TG 20:2_20:2_20:5	AAKFZIDLWHXPLE-VZAIXHNBNA-N, ABLUWXSBXAOOQH-GWECHVTQNA-N, ADSIQCRMWVKEMW-GNENTNQANA-N, AFAPQLPOHNDJJH-BOSPLGJPNA-N, AHTTULMKWLTZHP-DRFLYOLSNA-N, AIBURFDSZYCILF-KPQDVJSINA-N, ALNGUXFZPBQWKO-BRXZAOBNNA-N, ALTGPPWMQCFXKZ-CHEDTDRCNA-N, AMYDUKOMGMPRKZ-DJLCBRLGNA-N, AOTFUYDDGGOHGP-ZZBVYBGYNA-N, APGQRDLPBMTDCS-WQUVXHGKNA-N, ASLDPKXLUPXVFY-QECSQYDQNA-N, AXWKWBHWAYYGSG-ZFBOJPNZNA-N, AZOPEODENZUTAX-CNTUYJS…	C63H104O6	1	M+Na	979.766		10.77	10.76	44.086	21.661	36.3636	100	-0.803025	2.11206e-13	1.63523e-12	-0.530644	0.000695895	0.00383427	-0.929758	0.0010936	0.00818548	-0.367694	0.00238967	0.010344	-0.372152	1.13394e-09	7.59562e-09
TAG 47:1	TAG	RP_PosMSMS_1048		Y	GL	TG 11:0_18:0_18:1 M+NH4 Atlas --- TG 13:0_16:0_18:1 M+NH4 Atlas --- TG 14:0_15:0_18:1 M+NH4 Atlas --- TG 14:0_16:0_17:1 M+NH4 Atlas --- TG 15:0_16:0_16:1 M+NH4 Atlas	Lipids and lipid-like molecules	Glycerolipids	Triradylcglycerols	HMDB0042101, HMDB0043025	TG(14:0/15:0/18:1(9Z)) --- TG(15:0/16:0/16:1(9Z))	Glycerolipids [GL]	Triradylglycerols [GL03]	Triacylglycerols [GL0301]	LMGL03013791 --- LMGL03014173 --- LMGL03014223 --- LMGL03015005	TG(13:0/16:0/18:1(9Z))[iso6] --- TG(14:0/15:0/18:1(9Z))[iso6] --- TG(14:0/16:0/17:1(9Z))[iso6] --- TG(15:0/16:0/16:1(9Z))[iso6]	TG 47:1	TG 13:0_16:0_18:1 --- TG 14:0_15:0_18:1 --- TG 14:0_16:0_17:1 --- TG 15:0_16:0_16:1	ALRNRVFCWUBQCR-IZHYLOQSNA-N, CNTLLRZLLQNETA-BZZOAKBMNA-N, LPFCBOFEKLNOFO-IZHYLOQSNA-N, PGYNJJCWPCAGLG-GYHWCHFENA-N, RCYIETYFTUBXFK-QOCHGBHMNA-N	C50H94O6	2	M+NH4	808.733	535.472	10.58	10.54	95.1613	4.96537	99.1736	100	0.793682	2.68114e-13	2.04922e-12	0.587609	0.000133312	0.00104058	0.925346	0.00104384	0.00818548	0.462505	8.87506e-05	0.00092178	0.379237	2.93059e-10	2.10494e-09
TAG 49:2	TAG	RP_PosMSMS_1133, 1150		Y	GL	TG 14:0_17:0_18:2 M+NH4 Atlas --- TG 15:0_16:1_18:1 M+NH4 Atlas --- TG 15:1_16:0_18:1 M+NH4 Atlas --- TG 16:0_16:1_17:1 M+NH4 Atlas, TG 15:0_15:0_19:2 M+Na Atlas --- TG 15:0_16:1_18:1 M+Na Atlas --- TG 16:0_16:0_17:2 M+Na Atlas	Lipids and lipid-like molecules	Glycerolipids	Triradylcglycerols	HMDB0043201	TG(15:0/16:1(9Z)/18:1(9Z))	Glycerolipids [GL]	Triradylglycerols [GL03]	Triacylglycerols [GL0301]	LMGL03010025 --- LMGL03014276 --- LMGL03015035 --- LMGL03015361, LMGL03010026 --- LMGL03015035	TG(14:0/17:0/18:2(9Z,12Z))[iso6] --- TG(15:0/16:1(9Z)/18:1(9Z))[iso6] --- TG(15:1(9Z)/16:0/18:1(9Z))[iso6] --- TG(16:0/16:1(9Z)/17:1(9Z))[iso6], TG(15:0/16:1(9Z)/18:1(9Z))[iso6] --- TG(16:0/16:0/17:2(9Z,12Z))[iso3]	TG 49:2	TG 14:0_17:0_18:2 --- TG 15:0_16:1_18:1 --- TG 15:1_16:0_18:1 --- TG 16:0_16:1_17:1, TG 15:0_16:1_18:1 --- TG 16:0_16:0_17:2	GDEPXLBAYBPEBZ-XTJQTONKNA-N, PTMMGTLFYOOVNO-LLMCKSEUNA-N, UNLQNCABWOVYJJ-NUJSLWOLNA-N, ZSHVDBVWHRXKEV-UOBUJMOANA-N, JYOMNDSJWZRTQE-XQUUTTIXNA-N, MZJULUYNWGJAQD-BSIAVTDWNA-N, ZSHVDBVWHRXKEV-UOBUJMOANA-N	C52H96O6	1	M+NH4, M+Na	834.7487, 839.7048		10.64	10.6	97.043	3.42308	99.1736	100	0.795411	3.55248e-13	2.67982e-12	0.604951	8.93357e-05	0.000750959	0.931093	0.0010408	0.00818548	0.482791	4.46999e-05	0.000577507	0.383078	2.36669e-10	1.76365e-09
TAG O-48:2	TAG-O	RP_PosMS1_1062		Y	GL	TG O-10:0_16:0_22:2 M+Na Atlas --- TG O-10:0_16:1_22:1 M+Na Atlas --- TG O-10:0_16:2_22:0 M+Na Atlas --- TG O-10:0_18:0_20:2 M+Na Atlas --- TG O-10:0_18:1_20:1 M+Na Atlas --- TG O-10:0_18:2_20:0 M+Na Atlas --- TG O-12:0_14:0_22:2 M+Na Atlas --- TG O-12:0_14:1_22:1 M+Na Atlas --- TG O-12:0_16:0_20:2 M+Na Atlas --- TG O-12:0_16:1_20:1 M+Na Atlas --- TG O-12:0_16:2_20:0 M+Na Atlas --- TG O-12:0_18:0…	Lipids and lipid-like molecules	Glycerolipids	Triradylcglycerols	HMDB0048588	TG(16:1(9Z)/14:1(9Z)/O-18:0)								ACGILWQBAKJOKZ-XCUCQOFMNA-N, ACGXATNVXKGNHE-UHVUIYCVNA-N, ADKRJVMTMSHQPL-NLHRPJCGNA-N, AFFUOZOUGRVQQT-FIBJHCEQNA-N, AULSNQAOMIYJQP-LLMCKSEUNA-N, AWGRJGKDCMXVNW-IZGAEGEENA-N, BBBPVKMDZHJMBD-FGBMEEFRNA-N, BDAHYHUVKCBFLZ-MYSACRKYNA-N, BLVUIDAVAXAKBR-IUFKAHDJNA-N, BODHDPVEUFFEPC-MYSACRKYNA-N, CFYCPMXCODIAEO-SKZTXPNNNA-N, CIMJVVBXIZACOV-UBTQEXSZNA-N, DCHQXEJYFSKXPD-BRBBRKRXNA-N, DISMODDITFGMLP-UBTQEXS…	C51H96O5	1	M+Na	811.714		10.55	10.47	38.7097	18.3285	92.562	100	0.787797	3.5961e-13	2.67982e-12	0.620239	4.72996e-05	0.000439951	0.921135	0.00105762	0.00818548	0.427401	0.000304703	0.0022947	0.383053	1.44017e-10	1.11503e-09
Lutein --- Zeaxanthin	Xenobiotics	RP_PosMS1_468	RT_2		nonGL	Lutein M+H HMDB --- Lutein M+H NIST --- VAE 18:3 M+Na Atlas --- Zeaxanthin M+H HMDB	Lipids and lipid-like molecules	Prenol lipids	Tetraterpenoids	HMDB0002789, HMDB0003233	Zeaxanthin --- Lutein	Prenol Lipids [PR]	Isoprenoids [PR01]	C40 isoprenoids (tetraterpenes) [PR0107]	LMPR01070261 --- LMPR01070274	Lutein --- Zeaxanthin			JKQXZKUSFCKOGQ-QAYBQHTQSA-N, KBPHJBAIARWVSC-RGZFRNHPSA-N, WGYRYGOQDJJQIQ-NFUUMXNPSA-N	C40H56O2	1	M+H --- M+Na	569.429		7.72	7.67	98.9247	14.3221	99.1736	100	-0.783107	3.77127e-13	2.77566e-12	-0.767071	1.91716e-07	8.3798e-06	-1.07457	0.000101089	0.00164964	-0.385974	0.00112838	0.00613824	-0.415629	6.49439e-13	8.79931e-12
TAG 54:5	TAG	RP_PosMSMS_1330, 1341		Y	GL	TG 18:1_18:2_18:2 M+NH4 Atlas, TG 16:0_18:1_20:4 M+Na Atlas --- TG 18:1_18:2_18:2 M+Na Atlas	Lipids and lipid-like molecules	Glycerolipids	Triradylcglycerols	HMDB0005461, HMDB0031115, HMDB0044132	TG(18:1(9Z)/18:2(9Z,12Z)/18:2(9Z,12Z)) --- Glycerol 1,2-di-(9Z,12Z-octadecadienoate) 3-(9Z-octadecenoate) --- TG(16:0/18:1(9Z)/20:4(8Z,11Z,14Z,17Z))	Glycerolipids [GL]	Triradylglycerols [GL03]	Triacylglycerols [GL0301]	LMGL03010327	TG(18:1(9Z)/18:2(9Z,12Z)/18:2(9Z,12Z))[iso3]	TG 54:5	TG 18:1_18:2_18:2	VVEBTVMJPTZDHO-WECKWCTPNA-N, VVEBTVMJPTZDHO-WECKWCTPNA-N, WNGNQJVTTOEUDY-ATPZPQLVNA-N	C57H100O6	1	M+NH4, M+Na	898.7797, 903.7349		10.68	10.66	93.8172	3.32631	95.8678	100	0.771349	4.26343e-13	3.09961e-12	0.577195	0.000123729	0.000991621	0.888711	0.00130021	0.0089381	0.301812	0.0107329	0.0295027	0.369075	3.75968e-10	2.63691e-09
TAG O-58:2	TAG-O	RP_PosMS1_1446		Y	GL	TG O-14:0_22:0_22:2 M+Na Atlas --- TG O-14:0_22:1_22:1 M+Na Atlas --- TG O-14:1_22:0_22:1 M+Na Atlas --- TG O-16:0_20:0_22:2 M+Na Atlas --- TG O-16:0_20:1_22:1 M+Na Atlas --- TG O-16:0_20:2_22:0 M+Na Atlas --- TG O-16:1_20:0_22:1 M+Na Atlas --- TG O-16:1_20:1_22:0 M+Na Atlas --- TG O-16:2_20:0_22:0 M+Na Atlas --- TG O-18:0_18:0_22:2 M+Na Atlas --- TG O-18:0_18:1_22:1 M+Na Atlas --- TG O-18:0_18:2…	Lipids and lipid-like molecules	Glycerolipids	Triradylcglycerols	HMDB0046655, HMDB0050527, HMDB0051594, HMDB0053328, HMDB0054380	TG(22:0/18:2(9Z,12Z)/O-18:0) --- TG(20:1(11Z)/20:1(11Z)/O-18:0) --- TG(22:1(13Z)/18:1(9Z)/O-18:0) --- TG(20:2n6/20:0/O-18:0) --- TG(22:2(13Z,16Z)/18:0/O-18:0)								AQPGNAQHWQBMKT-XWAXDLMJNA-N, BMOVEZNYKLXFQH-QYIMKBBWNA-N, BXFKTWLTXGOBEA-LVBVOWIENA-N, CIXCULDFPCVHHJ-HBLVUIEFNA-N, CJIYDZCBEVDWCW-LVBVOWIENA-N, DYLAPHHDYKOXTM-GRGWYUSKNA-N, DYOMBYVKIKSSKA-FOFJVPNENA-N, FUIZMUJCQMPCQO-AWOVZMASNA-N, GELLCYIBARRGEQ-LBXGSASVNA-N, GVNOVHPRZPBICJ-FIQXLTFTNA-N, GWONLPRKRGHCSH-XWAXDLMJNA-N, GYHLNTVFYDYOSI-RRBMBBTGNA-N, GZLLGJZWPNACTL-LBXGSASVNA-N, HLDABGRURHIGCJ-RZEXXKR…	C61H116O5	1	M+Na	951.868		12.37	12.34	65.0538	27.6968	94.2149	100	0.751904	7.06934e-13	5.07766e-12	0.608176	3.34256e-05	0.00034244	1.09998	3.60139e-05	0.000741871	0.428352	0.000163774	0.00148485	0.380191	2.68162e-11	2.53758e-10
Thyroxine	Amino acids, peptides, and analogues	RP_PosMS1_948			nonGL	L-Thyroxine M+H NIST --- Thyroxine M+H HMDB	Organic acids and derivatives	Carboxylic acids and derivatives	Amino acids, peptides, and analogues	HMDB0000248	Thyroxine								XUIIKFGFIJCVMT-LBPRGKRZSA-N	C15H11I4NO4	1	M+H	777.691		10.36	10.34	31.9892	27.1253	70.2479	84.6939	0.776214	7.42953e-13	5.27285e-12	0.634944	2.69852e-05	0.000290056	0.829482	0.00321716	0.0171777	0.423984	0.000319703	0.0022947	0.377443	2.43542e-10	1.79247e-09
TAG 48:5	TAG	RP_PosMSMS_1086		Y	GL	TG 10:0_10:0_28:5 M+Na Atlas --- TG 10:0_12:0_26:5 M+Na Atlas --- TG 10:0_14:0_24:5 M+Na Atlas --- TG 10:0_14:1_24:4 M+Na Atlas --- TG 10:0_16:0_22:5 M+Na Atlas --- TG 10:0_16:1_22:4 M+Na Atlas --- TG 10:0_16:2_22:3 M+Na Atlas --- TG 10:0_16:3_22:2 M+Na Atlas --- TG 10:0_16:4_22:1 M+Na Atlas --- TG 10:0_18:0_20:5 M+Na Atlas --- TG 10:0_18:1_20:4 M+Na Atlas --- TG 10:0_18:2_20:3 M+Na Atlas --- TG …	Lipids and lipid-like molecules	Glycerolipids	Triradylcglycerols	HMDB0042087, HMDB0042296, HMDB0042325, HMDB0047787, HMDB0047924	TG(14:0/14:0/20:5(5Z,8Z,11Z,14Z,17Z)) --- TG(14:0/14:1(9Z)/20:4(8Z,11Z,14Z,17Z)) --- TG(14:0/16:1(9Z)/18:4(6Z,9Z,12Z,15Z)) --- TG(14:1(9Z)/16:0/18:4(6Z,9Z,12Z,15Z)) --- TG(14:1(9Z)/16:1(9Z)/18:3(9Z,12Z,15Z))	Glycerolipids [GL]	Triradylglycerols [GL03]	Triacylglycerols [GL0301]	LMGL03012720 --- LMGL03012774 --- LMGL03012848 --- LMGL03012936 --- LMGL03013236 --- LMGL03013338 --- LMGL03013465 --- LMGL03013483 --- LMGL03013750 --- LMGL03013867 --- LMGL03013888 --- LMGL03014255 --- LMGL03014636 --- LMGL03014660 --- LMGL03014988	TG(12:0/14:0/22:5(7Z,10Z,13Z,16Z,19Z))[iso6] --- TG(12:0/16:0/20:5(5Z,8Z,11Z,14Z,17Z))[iso6] --- TG(12:0/18:1(9Z)/18:4(6Z,9Z,12Z,15Z))[iso6] --- TG(12:0/18:2(9Z,12Z)/18:3(9Z,12Z,15Z))[iso6] --- TG(13:0/13:0/22:5(7Z,10Z,13Z,16Z,19Z))[iso3] --- TG(13:0/15:0/20:5(5Z,8Z,11Z,14Z,17Z))[iso6] --- TG(13:0/17:1(9Z)/18:4(6Z,9Z,12Z,15Z))[iso6] --- TG(13:0/17:2(9Z,12Z)/18:3(9Z,12Z,15Z))[iso6] --- TG(14:0/14:…	TG 48:5	TG 12:0_14:0_22:5 --- TG 12:0_16:0_20:5 --- TG 12:0_18:1_18:4 --- TG 12:0_18:2_18:3 --- TG 13:0_13:0_22:5 --- TG 13:0_15:0_20:5 --- TG 13:0_17:1_18:4 --- TG 13:0_17:2_18:3 --- TG 14:0_14:0_20:5 --- TG 14:0_16:1_18:4 --- TG 14:1_16:0_18:4 --- TG 14:1_16:1_18:3 --- TG 14:1_17:2_17:2 --- TG 15:0_15:1_18:4 --- TG 15:1_15:1_18:3	AABHFEPCHYLJRN-MACWJNHMNA-N, AADIXRFTTVRVGN-QGYCKAEVNA-N, ABBLNCHSPJSXMK-RGOJOAFFNA-N, BDRDOLCPZFPOPT-ICVDORIFNA-N, BLXHWYMGRTVMSW-JUZLMTJXNA-N, BQEFQVFDQSLBQC-KRFBICOBNA-N, BQGWSZZPTLVJBZ-DSQBCWJYNA-N, BWVGJFBXJRVPRD-DBCKGOJCNA-N, BYTGXWVLWGHFDH-GYMCXTIANA-N, CGDLSVYEFLQRKH-NORMYGAJNA-N, DDLIYMBOXKTSMY-QLLXLXBFNA-N, DFMHASCQQAJUQG-YAQPKWDVNA-N, DGBBVYATEHGBLR-LIEHSWBRNA-N, DKPXWHQONIVYNQ-QNCVTWO…	C51H88O6	1	M+Na	819.642		9.66	9.6	66.9355	4.03287	99.1736	100	0.778495	1.38844e-12	9.73804e-12	0.564462	0.000269005	0.00183728	0.922071	0.00113841	0.00818548	0.318538	0.00861507	0.0264642	0.37066	1.08146e-09	7.32642e-09
TAG 44:1	TAG	RP_PosMSMS_907, 931		Y	GL	TG 10:0_16:0_18:1 M+NH4 Atlas --- TG 12:0_14:0_18:1 M+NH4 Atlas --- TG 12:0_16:0_16:1 M+NH4 Atlas --- TG 14:0_14:1_16:0 M+NH4 Atlas --- TG 14:0_15:0_15:1 M+NH4 Atlas, TG 10:0_10:0_24:1 M+Na Atlas --- TG 10:0_12:0_22:1 M+Na Atlas --- TG 10:0_13:0_21:1 M+Na Atlas --- TG 10:0_13:1_21:0 M+Na Atlas --- TG 10:0_14:0_20:1 M+Na Atlas --- TG 10:0_14:1_20:0 M+Na Atlas --- TG 10:0_15:0_19:1 M+Na Atlas --- T…	Lipids and lipid-like molecules	Glycerolipids	Triradylcglycerols	HMDB0042273, HMDB0243869, HMDB0042069, HMDB0042995	TG(14:0/14:0/16:1(9Z)) --- TG(14:0/14:1(9Z)/16:0) --- TG(15:0/15:0/14:1(9Z)) --- 1-Dodecanoyl-2-hexadecanoyl-3-(9Z-hexadecenoyl)-sn-glycerol	Glycerolipids [GL]	Triradylglycerols [GL03]	Triacylglycerols [GL0301]	LMGL03013217 --- LMGL03013322 --- LMGL03014139 --- LMGL03014166, LMGL03012646 --- LMGL03012701 --- LMGL03012757 --- LMGL03012842 --- LMGL03013193 --- LMGL03013217 --- LMGL03013245 --- LMGL03013271 --- LMGL03013297 --- LMGL03013322 --- LMGL03013678 --- LMGL03013706 --- LMGL03013733 --- LMGL03013759 --- LMGL03014139 --- LMGL03014166	TG(12:0/14:0/18:1(9Z))[iso6] --- TG(12:0/16:0/16:1(9Z))[iso6] --- TG(14:0/14:1(9Z)/16:0)[iso6] --- TG(14:0/15:0/15:1(9Z))[iso6], TG(12:0/12:0/20:1(11Z))[iso3] --- TG(12:0/13:0/19:1(9Z))[iso6] --- TG(12:0/14:0/18:1(9Z))[iso6] --- TG(12:0/14:1(9Z)/18:0)[iso6] --- TG(12:0/15:0/17:1(9Z))[iso6] --- TG(12:0/15:1(9Z)/17:0)[iso6] --- TG(12:0/16:0/16:1(9Z))[iso6] --- TG(13:0/13:0/18:1(9Z))[iso3] --- TG(13…	TG 44:1	TG 12:0_14:0_18:1 --- TG 12:0_16:0_16:1 --- TG 14:0_14:1_16:0 --- TG 14:0_15:0_15:1, TG 12:0_12:0_20:1 --- TG 12:0_13:0_19:1 --- TG 12:0_14:0_18:1 --- TG 12:0_14:1_18:0 --- TG 12:0_15:0_17:1 --- TG 12:0_15:1_17:0 --- TG 12:0_16:0_16:1 --- TG 13:0_13:0_18:1 --- TG 13:0_14:0_17:1 --- TG 13:0_14:1_17:0 --- TG 13:0_15:0_16:1 --- TG 13:0_15:1_16:0 --- TG 14:0_14:0_16:1 --- TG 14:0_14:1_16:0 --- TG 14:…	JCLYCUUABFXFLR-MNDPQUGUNA-N, JRZPEKVQFIJQHH-SDXDJHTJNA-N, MVBJOSAJFXMGHL-FCQUAONHNA-N, OUKDNADVOQVFAR-VZCXRCSSNA-N, PBCMCGPSXULJSG-FCQUAONHNA-N, ABNXDWILIVMNRZ-JZJYNLBNNA-N, AFLAVEXZXAIHHU-QINSGFPZNA-N, AVOSYSUBIBSHKI-VKAVYKQENA-N, BNHHNJCSMWFDJO-FCQUAONHNA-N, BQNTVQLKUUXQOI-PEZBUJJGNA-N, CHUBVMNAICAOHA-VKAVYKQENA-N, CTDXGQTZMWOMFF-VHXPQNKSNA-N, CTFWCRSTRKWODH-KAMYIIQDNA-N, CTGTUNJIKUDUCJ-LNVKXUE…	C47H88O6	2, 1	M+NH4, M+Na	766.6874, 771.6422	493.418	10.01	9.975	97.5806	2.62895	100	100	0.760772	1.41913e-12	9.83756e-12	0.545743	0.000317697	0.00210832	0.877625	0.0015615	0.0102347	0.382617	0.00110617	0.00608141	0.359945	1.4768e-09	9.56968e-09
TAG 53:10	TAG	RP_PosMS1_1265		Y	GL	DGGA 13:0_27:0 M+NH4 Atlas --- DGGA 14:0_26:0 M+NH4 Atlas --- DGGA 15:0_25:0 M+NH4 Atlas --- DGGA 16:0_24:0 M+NH4 Atlas --- DGGA 17:0_23:0 M+NH4 Atlas --- DGGA 18:0_22:0 M+NH4 Atlas --- DGGA 19:0_21:0 M+NH4 Atlas --- DGGA 20:0_20:0 M+NH4 Atlas --- TG 11:0_16:3_26:7 M+NH4 Atlas --- TG 11:0_16:4_26:6 M+NH4 Atlas --- TG 11:0_18:4_24:6 M+NH4 Atlas --- TG 11:0_18:5_24:5 M+NH4 Atlas --- TG 11:0_20:4_22…						Glycerolipids [GL]	Triradylglycerols [GL03]	Triacylglycerols [GL0301]	LMGL03012744 --- LMGL03013018 --- LMGL03014016 --- LMGL03015578	TG(13:0/18:4(6Z,9Z,12Z,15Z)/22:6(4Z,7Z,10Z,13Z,16Z,19Z))[iso6] --- TG(13:0/20:5(5Z,8Z,11Z,14Z,17Z)/20:5(5Z,8Z,11Z,14Z,17Z))[iso3] --- TG(15:1(9Z)/18:4(6Z,9Z,12Z,15Z)/20:5(5Z,8Z,11Z,14Z,17Z))[iso6] --- TG(17:2(9Z,12Z)/18:4(6Z,9Z,12Z,15Z)/18:4(6Z,9Z,12Z,15Z))[iso3]	TG 53:10	TG 13:0_18:4_22:6 --- TG 13:0_20:5_20:5 --- TG 15:1_18:4_20:5 --- TG 17:2_18:4_18:4	AKIFDHDKMAYVIC-UHFFFAOYNA-N, AWGWXJJVNRZGAP-VZZOOVHRNA-N, BRYBHUDLFVCRMY-DVPXPKKENA-N, BTRDUZROPJXQCJ-UHFFFAOYNA-N, BYIHTWZCMQKBRF-AWZDZJDPNA-N, CCGKNNNSYRHCOD-QGVQNHSRNA-N, CZLLCVJCCWYWEN-OMKQUPNGNA-N, DVMNBZWKBQCUQH-VQEBDTOVNA-N, DVNNGKKEYHKHMY-HGLRFDLQNA-N, FTJVXZJRNMEFLY-UHFFFAOYNA-N, FUWZOUCSVODWML-NVRPFKRQNA-N, HETOCBBOOIWSGD-MAAVHZEXNA-N, HLAOEXLGAXUUOH-AFLVBVLJNA-N, HOQWEPIRKTVDBT-BDGQVXQ…	C56H88O6	1	M+NH4	874.693		10.08	10.08	70.9677	3.56806	100	100	0.776277	1.96805e-12	1.34859e-11	0.57353	0.000217464	0.00152109	0.870879	0.00224601	0.0128519	0.300144	0.0137412	0.0347489	0.368892	1.50437e-09	9.64351e-09
TAG O-56:8	TAG-O	RP_PosMS1_1361		Y	GL	TG O-12:0_22:2_22:6 M+Na Atlas --- TG O-12:0_22:3_22:5 M+Na Atlas --- TG O-12:0_22:4_22:4 M+Na Atlas --- TG O-14:0_20:2_22:6 M+Na Atlas --- TG O-14:0_20:3_22:5 M+Na Atlas --- TG O-14:0_20:4_22:4 M+Na Atlas --- TG O-14:0_20:5_22:3 M+Na Atlas --- TG O-14:1_20:1_22:6 M+Na Atlas --- TG O-14:1_20:2_22:5 M+Na Atlas --- TG O-14:1_20:3_22:4 M+Na Atlas --- TG O-14:1_20:4_22:3 M+Na Atlas --- TG O-14:1_20:5…	Lipids and lipid-like molecules	Glycerolipids	Triradylcglycerols	HMDB0055660, HMDB0055780	TG(20:4(8Z,11Z,14Z,17Z)/18:4(6Z,9Z,12Z,15Z)/O-18:0) --- TG(20:5(5Z,8Z,11Z,14Z,17Z)/18:3(9Z,12Z,15Z)/O-18:0)								AHYLJVKWPJAYAT-NQAYCGKSNA-N, ALGJPVSNXCZPNP-YNXFNPAFNA-N, AMTCVYXSHKHGAI-CPRJYEQFNA-N, ANNCSSCTEPBANZ-XBZDXEJUNA-N, ANOJIMODCCBNBH-WGZUGKALNA-N, AUWVWWNVBDUCGC-MYNTXOQANA-N, BDDGXKPAJKWKTC-JADCNTOBNA-N, BFKHVJIDVSMZKN-XRSLUVBANA-N, BGHJNAFTHDBWAH-CVNWYVPDNA-N, BHMFNVIDRMDDTL-BLSPISNXNA-N, BIHYEHDXOUMQJS-IZOCWOLQNA-N, BKUQJHGRQAJKGF-SSUGKINMNA-N, BSPSZEPKAICBKL-RUHWUQOPNA-N, BYDYPYMLNGCZMB-OCNLKIJ…	C59H100O5	1	M+Na	911.741		11.29	11.24	93.5484	14.9736	85.124	100	0.764242	2.60836e-12	1.76704e-11	0.582568	0.000140044	0.00108027	0.880559	0.00175323	0.0109918	0.391309	0.000990295	0.00570488	0.367552	1.04186e-09	7.13928e-09
TAG 59:12	TAG	RP_PosMS1_1450		Y	GL	DGGA 20:0_26:2 M+NH4 Atlas --- DGGA 20:1_26:1 M+NH4 Atlas --- DGGA 22:0_24:2 M+NH4 Atlas --- DGGA 22:1_24:1 M+NH4 Atlas --- DGGA 24:0_22:2 M+NH4 Atlas --- DGGA 25:0_21:2 M+NH4 Atlas --- DGGA 26:0_20:2 M+NH4 Atlas --- DGGA 27:0_19:2 M+NH4 Atlas --- TG 11:0_16:3_32:9 M+NH4 Atlas --- TG 11:0_16:4_32:8 M+NH4 Atlas --- TG 11:0_18:4_30:8 M+NH4 Atlas --- TG 11:0_18:5_30:7 M+NH4 Atlas --- TG 11:0_20:5_28…	Lipids and lipid-like molecules	Glycerolipids	Triradylcglycerols	HMDB0043799	TG(15:0/22:6(4Z,7Z,10Z,13Z,16Z,19Z)/22:6(4Z,7Z,10Z,13Z,16Z,19Z))	Glycerolipids [GL]	Triradylglycerols [GL03]	Triacylglycerols [GL0301]	LMGL03011824 --- LMGL03011833 --- LMGL03012926 --- LMGL03015706	TG(15:0/22:6(4Z,7Z,10Z,13Z,16Z,19Z)/22:6(4Z,7Z,10Z,13Z,16Z,19Z))[iso3] --- TG(15:1(9Z)/22:5(7Z,10Z,13Z,16Z,19Z)/22:6(4Z,7Z,10Z,13Z,16Z,19Z))[iso6] --- TG(17:1(9Z)/20:5(5Z,8Z,11Z,14Z,17Z)/22:6(4Z,7Z,10Z,13Z,16Z,19Z))[iso6] --- TG(17:2(9Z,12Z)/20:5(5Z,8Z,11Z,14Z,17Z)/22:5(7Z,10Z,13Z,16Z,19Z))[iso6]	TG 59:12	TG 15:0_22:6_22:6 --- TG 15:1_22:5_22:6 --- TG 17:1_20:5_22:6 --- TG 17:2_20:5_22:5	ANCCKVYQBMZXIE-LIBKOIKINA-N, AVNCRWKIMVTGDZ-VJVQKSPHNA-N, BCIDVPIAEAFXPU-ITTWRFGSNA-N, BPNXTXWCJVDQLO-BLCHARGVNA-N, BUGAMORLACKMIL-TZKLIYFUNA-N, CLUYFHOWMVMLCQ-URVAWFDXNA-N, CWORXPMNBGEYDO-SEIXGVPGNA-N, DLEVQZGDKJDALJ-WOTREGJNNA-N, DSFZTBOOYWWYBS-IBJRRFJSNA-N, DXRVHKMFONFZTE-CVIFLSHVNA-N, FISDSOJXLVGGQB-OGDCKYMUNA-N, FIVGPDCMLIGIBW-FDORGKCENA-N, FLMTUUXKKZIBQS-BTDQIQSVNA-N, FTQXLKAZNJRPQQ-GMVFLHP…	C62H96O6	1	M+NH4	954.754		10.72	10.7	88.172	7.23515	100	100	-0.768238	3.05425e-12	2.04587e-11	-0.546099	0.000428142	0.00262355	-1.21724	1.03535e-05	0.000311031	-0.354256	0.00327455	0.01282	-0.380215	2.83038e-10	2.05775e-09
TAG 58:4	TAG	RP_PosMSMS_1455		Y	GL	TG 18:1_18:2_22:1 M+NH4 Atlas --- TG 18:2_18:2_22:0 M+NH4 Atlas	Lipids and lipid-like molecules	Glycerolipids	Triradylcglycerols	HMDB0046641, HMDB0050004	TG(22:0/18:2(9Z,12Z)/18:2(9Z,12Z)) --- TG(18:1(9Z)/18:2(9Z,12Z)/22:1(13Z))	Glycerolipids [GL]	Triradylglycerols [GL03]	Triacylglycerols [GL0301]	LMGL03011042 --- LMGL03011049	TG(18:1(9Z)/18:2(9Z,12Z)/22:1(13Z))[iso6] --- TG(18:2(9Z,12Z)/18:2(9Z,12Z)/22:0)[iso3]	TG 58:4	TG 18:1_18:2_22:1 --- TG 18:2_18:2_22:0	OEWUGNNMLZAOCV-FCWOHNRGNA-N, ZIRJXTDTRZMNMW-KPAPURHWNA-N	C61H110O6	1	M+NH4	956.858		11.57	11.53	49.4624	17.0363	64.4628	100	0.736658	3.40716e-12	2.2569e-11	0.581651	8.15539e-05	0.000712967	1.03032	0.000125289	0.00184351	0.344994	0.00284682	0.0116762	0.367473	2.04496e-10	1.54319e-09
TAG 53:2	TAG	RP_PosMSMS_1310, 1325		Y	GL	TG 17:0_18:1_18:1 M+NH4 Atlas, TG 17:0_18:1_18:1 M+Na Atlas	Lipids and lipid-like molecules	Glycerolipids	Triradylcglycerols	HMDB0062701	TG(17:0/18:1(9Z)/18:1(9Z))	Glycerolipids [GL]	Triradylglycerols [GL03]	Triacylglycerols [GL0301]	LMGL03010138	TG(17:0/18:1(9Z)/18:1(9Z))[iso3]	TG 53:2	TG 17:0_18:1_18:1	ANBFFIILUQJIQL-RZEXXKRKNA-N	C56H104O6	2	M+NH4, M+Na	890.8109, 895.7664	265.2507, 603.5379	11.27	11.24	88.4409	4.53493	93.3884	100	0.753178	4.54656e-12	2.97854e-11	0.530177	0.000534764	0.00310291	0.429177	0.133047	0.242235	0.53179	3.5121e-06	0.000161583	0.331179	6.05843e-08	3.25387e-07
TAG 45:0	TAG	RP_PosMSMS_962		Y	GL	TG 13:0_16:0_16:0 M+NH4 Atlas --- TG 14:0_14:0_17:0 M+NH4 Atlas --- TG 14:0_15:0_16:0 M+NH4 Atlas --- TG 15:0_15:0_15:0 M+NH4 Atlas	Lipids and lipid-like molecules	Glycerolipids	Triradylcglycerols	HMDB0042989	TG(15:0/15:0/15:0)	Glycerolipids [GL]	Triradylglycerols [GL03]	Triacylglycerols [GL0301]	LMGL03012621	TG(15:0/15:0/15:0)	TG 45:0	TG 15:0_15:0_15:0	CLJLWABDLPQTHL-UHFFFAOYSA-N, GXBQKNFDIKCBTL-UHFFFAOYNA-N, PFFOZPTURKUJLN-UHFFFAOYNA-N, RIBSYLFDZQICKH-UHFFFAOYNA-N	C48H92O6	1	M+NH4	782.717		10.5	10.47	67.4731	13.3224	93.3884	100	0.73694	7.71491e-12	4.9491e-11	0.528171	0.000466761	0.00280382	0.842167	0.00230391	0.0130544	0.425438	0.000233857	0.00191832	0.348162	4.96428e-09	3.08282e-08
TAG 46:0	TAG	RP_PosMSMS_1016		Y	GL	TG 14:0_16:0_16:0 M+NH4 Atlas	Lipids and lipid-like molecules	Glycerolipids	Triradylcglycerols	HMDB0042123	TG(14:0/16:0/16:0)	Glycerolipids [GL]	Triradylglycerols [GL03]	Triacylglycerols [GL0301]	LMGL03012786	TG(14:0/16:0/16:0)[iso3]	TG 46:0	TG 14:0_16:0_16:0	JWVXCFSNEOMSHH-UHFFFAOYNA-N	C49H94O6	2	M+NH4	796.733	523.476	10.72	10.66	97.8495	13.5064	100	100	0.744975	7.72051e-12	4.9491e-11	0.613202	4.76406e-05	0.000439951	0.798737	0.00436895	0.021575	0.47355	4.37052e-05	0.000577507	0.363061	1.22634e-09	8.12326e-09
DAG 30:0	DAG	RP_PosMSMS, MS1_448, 455		Y	GL	Cer 10:0;3O/23:0;(2OH) M+H Atlas --- Cer 11:0;3O/22:0;(2OH) M+H Atlas --- Cer 12:0;3O/21:0;(2OH) M+H Atlas --- Cer 13:0;3O/20:0;(2OH) M+H Atlas --- Cer 14:0;3O/19:0;(2OH) M+H Atlas --- Cer 15:0;3O/18:0;(2OH) M+H Atlas --- Cer 16:0;3O/17:0;(2OH) M+H Atlas --- Cer 17:0;3O/16:0;(2OH) M+H Atlas --- Cer 18:0;3O/15:0;(2OH) M+H Atlas --- Cer 19:0;3O/14:0;(2OH) M+H Atlas --- Cer 20:0;3O/13:0;(2OH) M+H At…	Lipids and lipid-like molecules	Glycerolipids	Diradylglycerols	HMDB0007011, HMDB0007068, HMDB0092951, HMDB0093001, HMDB0093087, HMDB0093223	DG(14:0/16:0/0:0) --- DG(15:0/15:0/0:0) --- DG(8:0/22:0/0:0) --- DG(10:0/20:0/0:0) --- DG(12:0/18:0/0:0) --- DG(13:0/17:0/0:0)	Glycerolipids [GL]	Diradylglycerols [GL02]	Diacylglycerols [GL0201]	LMGL02010326 --- LMGL02010335 --- LMGL02010356 --- LMGL02010378	DG(12:0/18:0/0:0)[iso2] --- DG(13:0/17:0/0:0)[iso2] --- DG(14:0/16:0/0:0)[iso2] --- DG(15:0/15:0/0:0)	DG 30:0	DG 12:0_18:0 --- DG 13:0_17:0 --- DG 14:0_16:0 --- DG 15:0_15:0	AWIVASZHYYFLKO-UHFFFAOYNA-N, CSHRDHYLKJMKJG-UHFFFAOYNA-N, DTYSVFICHIWUIV-UHFFFAOYNA-N, DUQCMPCUGCLYPR-UHFFFAOYNA-N, FWYXULJVROPNGE-UHFFFAOYNA-N, GBZONYOEPVAVLC-UHFFFAOYNA-N, HDRMGMWQCKNPQD-UHFFFAOYNA-N, HNYMGPOQSLMXCW-UHFFFAOYNA-N, HTNYZZVFWAFPIJ-UHFFFAOYNA-N, JBKDIYVWGKGHKZ-UHFFFAOYNA-N, JYBOVBZXKDOKSB-UHFFFAOYNA-N, LHNCJADNRAAEAW-UHFFFAOYNA-N, MQXLJFBHUBVEQR-UHFFFAOYNA-N, MUSLWUNQWWGKSE-UHFFFAO…	C33H64O5	1	M+H --- M+NH4, M+Na	558.505, 563.4609		6.91	6.87	100	15.218	100	100	0.749284	1.18224e-11	7.4979e-11	0.602794	8.26866e-05	0.000713358	0.885797	0.00171025	0.0108164	0.416035	0.000461435	0.00313767	0.367101	1.31719e-09	8.6292e-09
CE 18:1	CE	RP_PosMS1_645		Y	nonGL	CE 18:1 M+Na Atlas	Lipids and lipid-like molecules	Steroids and steroid derivatives	Steroid esters	HMDB0000918, HMDB0246123	CE(18:1(9Z)) --- Cholest-5-en-3-ol (3beta)-, (9Z)-9-octadecenoate	Sterols [ST]	Sterols [ST01]	Cholesteryl esters [ST0102]	LMST01020003 --- LMST01020030	18:1 Cholesterol ester --- 18:1 Cholesterol ester (d5)	CE 18:1		RJECHNNFRHZQKU-PFONDFGANA-N	C45H73D5O2, C45H78O2	1	M+Na	673.585		11.35	11.31	73.3871	13.3871	95.8678	100	-0.742056	1.7991e-11	1.129e-10	-0.709873	2.14897e-06	4.14417e-05	-1.10462	6.62597e-05	0.00120324	-0.456433	0.000102981	0.00100413	-0.395459	2.2031e-11	2.2261e-10
TAG 43:1	TAG	RP_PosMSMS_866		Y	GL	TG 9:0_16:0_18:1 M+NH4 Atlas													GYAKQOJSBLLBMP-FCQUAONHNA-N	C46H86O6	1	M+NH4	752.671		9.79	9.76	47.043	5.81187	100	100	0.737069	2.35356e-11	1.46156e-10	0.548384	0.000354118	0.00227632	0.925075	0.000959835	0.00795434	0.356085	0.00283944	0.0116762	0.356156	4.11326e-09	2.58122e-08
TAG 49:1	TAG	RP_PosMSMS_1145, 1159		Y	GL	TG 15:0_16:0_18:1 M+NH4 Atlas, TG 15:0_15:0_19:1 M+Na Atlas --- TG 15:0_16:0_18:1 M+Na Atlas	Lipids and lipid-like molecules	Glycerolipids	Triradylcglycerols	HMDB0043027	TG(15:0/16:0/18:1(9Z))	Glycerolipids [GL]	Triradylglycerols [GL03]	Triacylglycerols [GL0301]	LMGL03015010, LMGL03012884 --- LMGL03015010	TG(15:0/16:0/18:1(9Z))[iso6], TG(15:0/15:0/19:1(9Z))[iso3] --- TG(15:0/16:0/18:1(9Z))[iso6]	TG 49:1	TG 15:0_16:0_18:1, TG 15:0_15:0_19:1 --- TG 15:0_16:0_18:1	IVRUJYRTYXTTIH-QPLCGJKRNA-N, CGNSBMCYBIAJRM-RQZHXJHFNA-N, IVRUJYRTYXTTIH-QPLCGJKRNA-N	C52H98O6	2, 1	M+NH4, M+Na	836.764, 841.7204	537.48	10.925	10.89	93.0108	5.67412	97.5207	100	0.732957	4.04227e-11	2.48437e-10	0.530507	0.000595105	0.00336231	0.868846	0.0020859	0.0123271	0.437842	0.000210302	0.00178166	0.348852	1.14569e-08	6.83014e-08
TAG 42:0	TAG	RP_PosMSMS_833		Y	GL	TG 12:0_14:0_16:0 M+NH4 Atlas	Lipids and lipid-like molecules	Glycerolipids	Triradylcglycerols	HMDB0095276, HMDB0103906	TG(12:0/14:0/16:0) --- TG(16:0/14:0/12:0)	Glycerolipids [GL]	Triradylglycerols [GL03]	Triacylglycerols [GL0301]	LMGL03013211	TG(12:0/14:0/16:0)[iso6]	TG 42:0	TG 12:0_14:0_16:0	PGZSAELMQZLYOA-UHFFFAOYNA-N	C45H86O6	1	M+NH4	740.671		9.95	9.92	87.0968	4.88517	100	100	0.712219	4.30814e-11	2.62076e-10	0.52997	0.000410614	0.00256407	0.908837	0.00088694	0.00761275	0.346834	0.00290891	0.0118369	0.344957	5.80074e-09	3.52874e-08
TAG 50:6	TAG	RP_PosMSMS_1154		Y	GL	TG 12:0_16:0_22:6 M+NH4 Atlas --- TG 12:0_18:2_20:4 M+NH4 Atlas						Glycerolipids [GL]	Triradylglycerols [GL03]	Triacylglycerols [GL0301]	LMGL03013346	TG(12:0/16:0/22:6(4Z,7Z,10Z,13Z,16Z,19Z))[iso6]	TG 50:6	TG 12:0_16:0_22:6	MLHGBIWZPHKGMZ-BWODIXBQNA-N, WECMOJMQFLIOCA-XVJNNCPSNA-N	C53H90O6	1	M+NH4	840.702		9.77	9.73	61.5591	4.82129	96.6942	100	0.734578	6.03147e-11	3.63204e-10	0.485394	0.00197674	0.00906357	0.817515	0.00425169	0.0211408	0.276438	0.0236266	0.0500407	0.338672	5.10703e-08	2.79322e-07
TAG 51:5	TAG	RP_PosMSMS_1219		Y	GL	TG 10:0_11:0_30:5 M+Na Atlas --- TG 10:0_13:0_28:5 M+Na Atlas --- TG 10:0_13:1_28:4 M+Na Atlas --- TG 10:0_15:0_26:5 M+Na Atlas --- TG 10:0_15:1_26:4 M+Na Atlas --- TG 10:0_17:0_24:5 M+Na Atlas --- TG 10:0_17:1_24:4 M+Na Atlas --- TG 10:0_17:2_24:3 M+Na Atlas --- TG 10:0_18:5_23:0 M+Na Atlas --- TG 10:0_19:0_22:5 M+Na Atlas --- TG 10:0_19:1_22:4 M+Na Atlas --- TG 10:0_19:2_22:3 M+Na Atlas --- TG …	Lipids and lipid-like molecules	Glycerolipids	Triradylcglycerols	HMDB0042118, HMDB0043043, HMDB0043216, HMDB0043273, HMDB0043417	TG(14:0/15:0/22:5(7Z,10Z,13Z,16Z,19Z)) --- TG(15:0/16:0/20:5(5Z,8Z,11Z,14Z,17Z)) --- TG(15:0/16:1(9Z)/20:4(8Z,11Z,14Z,17Z)) --- TG(15:0/18:1(9Z)/18:4(6Z,9Z,12Z,15Z)) --- TG(15:0/18:2(9Z,12Z)/18:3(9Z,12Z,15Z))	Glycerolipids [GL]	Triradylglycerols [GL03]	Triacylglycerols [GL0301]	LMGL03010081 --- LMGL03010105 --- LMGL03010107 --- LMGL03010108 --- LMGL03012961 --- LMGL03013394 --- LMGL03013437 --- LMGL03013558 --- LMGL03013810 --- LMGL03013918 --- LMGL03013989 --- LMGL03014004 --- LMGL03014192 --- LMGL03014287 --- LMGL03014437 --- LMGL03014623 --- LMGL03014735 --- LMGL03014827 --- LMGL03014842 --- LMGL03015022 --- LMGL03015149 --- LMGL03015167 --- LMGL03015480 --- LMGL0301…	TG(12:0/17:0/22:5(7Z,10Z,13Z,16Z,19Z))[iso6] --- TG(12:0/17:2(9Z,12Z)/22:3(10Z,13Z,16Z))[iso6] --- TG(12:0/19:0/20:5(5Z,8Z,11Z,14Z,17Z))[iso6] --- TG(13:0/16:0/22:5(7Z,10Z,13Z,16Z,19Z))[iso6] --- TG(13:0/18:0/20:5(5Z,8Z,11Z,14Z,17Z))[iso6] --- TG(13:0/18:3(9Z,12Z,15Z)/20:2(11Z,14Z))[iso6] --- TG(13:0/18:4(6Z,9Z,12Z,15Z)/20:1(11Z))[iso6] --- TG(14:0/15:0/22:5(7Z,10Z,13Z,16Z,19Z))[iso6] --- TG(14:0…	TG 51:5	TG 12:0_17:0_22:5 --- TG 12:0_17:2_22:3 --- TG 12:0_19:0_20:5 --- TG 13:0_16:0_22:5 --- TG 13:0_18:0_20:5 --- TG 13:0_18:3_20:2 --- TG 13:0_18:4_20:1 --- TG 14:0_15:0_22:5 --- TG 14:0_17:0_20:5 --- TG 14:0_18:4_19:1 --- TG 14:1_15:1_22:3 --- TG 14:1_17:2_20:2 --- TG 14:1_18:3_19:1 --- TG 14:1_18:4_19:0 --- TG 15:0_16:0_20:5 --- TG 15:0_18:1_18:4 --- TG 15:0_18:2_18:3 --- TG 15:1_18:0_18:4 --- TG …	ACCVGSHKRAHRPS-FHWHOTEENA-N, AKZJJZKGJLRMNT-AKCDRULPNA-N, AMKXSAMRTRLEBZ-BUFYRCOINA-N, AMXXNFGRYHWAIZ-UNZGPCCPNA-N, APTIDLJRIZDMGU-WJGKFJHVNA-N, ASJHAZGUSXEGNS-YTTFAOLSNA-N, BCWXVLSXCLXXQA-GRGFZWLANA-N, BDEHTNRLLBFZCS-GMUXAQIUNA-N, BMQUNSANKJFWMY-KMIOZARSNA-N, BPJQDQAVROPYQF-NTMRYDSBNA-N, BUZJVFPJBPHXEY-KMAJXIHVNA-N, BVAWMQRPOZVGMB-ZBJIVRBXNA-N, CDQCUOVUHMARLK-PWSKTLNONA-N, CKUIZBMCRHVGDA-OAZZTAG…	C54H94O6	1	M+Na	861.689		10.15	10.17	68.2796	7.75951	97.5207	100	0.726229	8.09899e-11	4.82829e-10	0.495357	0.00146435	0.00711207	0.921065	0.00110034	0.00818548	0.287666	0.0176416	0.041253	0.343542	2.37236e-08	1.37311e-07
TAG 43:0	TAG	RP_PosMSMS_875		Y	GL	TG 12:0_15:0_16:0 M+NH4 Atlas --- TG 13:0_14:0_16:0 M+NH4 Atlas --- TG 13:0_15:0_15:0 M+NH4 Atlas	Lipids and lipid-like molecules	Glycerolipids	Triradylcglycerols	HMDB0095418, HMDB0097246, HMDB0097440, HMDB0101349, HMDB0103917, HMDB0104030	TG(12:0/15:0/16:0) --- TG(13:0/14:0/16:0) --- TG(13:0/15:0/15:0) --- TG(15:0/15:0/13:0) --- TG(16:0/14:0/13:0) --- TG(16:0/15:0/12:0)	Glycerolipids [GL]	Triradylglycerols [GL03]	Triacylglycerols [GL0301]	LMGL03012724 --- LMGL03013268 --- LMGL03013675	TG(12:0/15:0/16:0)[iso6] --- TG(13:0/14:0/16:0)[iso6] --- TG(13:0/15:0/15:0)[iso3]	TG 43:0	TG 12:0_15:0_16:0 --- TG 13:0_14:0_16:0 --- TG 13:0_15:0_15:0	IEKCDOQWZSTGGO-UHFFFAOYNA-N, XADPVJYZRZMXLV-UHFFFAOYNA-N, ZRSVGPOZCZNLBE-UHFFFAOYNA-N	C46H88O6	1	M+NH4	754.686		10.1	10.08	44.6237	9.59237	95.8678	100	0.695381	1.11631e-10	6.58909e-10	0.513061	0.000586397	0.00334333	0.884754	0.0011365	0.00818548	0.310048	0.00765895	0.024214	0.335895	1.31062e-08	7.73603e-08
DAG 38:4	DAG	RP_PosMSMS_617		Y	GL	Cer 14:1;2O/27:3;2O M+H Atlas --- Cer 15:1;2O/26:3;2O M+H Atlas --- Cer 15:2;3O/26:2;(2OH) M+H Atlas --- Cer 17:2;3O/24:2;(2OH) M+H Atlas --- Cer 18:3;3O/23:1;(2OH) M+H Atlas --- Cer 19:2;3O/22:2;(2OH) M+H Atlas --- Cer 19:3;3O/22:1;(2OH) M+H Atlas --- Cer 20:3;3O/21:1;(2OH) M+H Atlas --- Cer 21:2;3O/20:2;(2OH) M+H Atlas --- Cer 21:3;3O/20:1;(2OH) M+H Atlas --- Cer 22:3;3O/19:1;(2OH) M+H Atlas --…	Lipids and lipid-like molecules	Glycerolipids	Diradylglycerols	HMDB0007171, HMDB0007254, HMDB0007367, HMDB0007395	DG(18:0/20:4(8Z,11Z,14Z,17Z)/0:0) --- DG(18:2(9Z,12Z)/20:2(11Z,14Z)/0:0) --- DG(20:0/18:4(6Z,9Z,12Z,15Z)/0:0) --- DG(20:1(11Z)/18:3(9Z,12Z,15Z)/0:0)	Glycerolipids [GL]	Diradylglycerols [GL02]	Diacylglycerols [GL0201]	LMGL02010109 --- LMGL02010126	DG(16:1(9Z)/22:3(10Z,13Z,16Z)/0:0)[iso2] --- DG(18:2(9Z,12Z)/20:2(11Z,14Z)/0:0)[iso2]	DG 38:4	DG 16:1_22:3 --- DG 18:2_20:2	AEXAIIXPZOWOHX-OFAZCYPNNA-N, AFNOPTSYGSPVGP-GJLVVWLQNA-N, AIPQKGADTJSOSN-FGIXQLCWNA-N, AWAPLSGLASJPGK-MSIUIGOANA-N, AZHQPCHBAXTAQH-QYZYPKEXNA-N, BRKLTVAHEPCGNK-ZKVKLVECNA-N, CRGUQGDZCIOZCG-MWTPLRSHNA-N, CUYIYOILCBLESE-OWTKOMDYNA-N, DKYPZIPXVSEISV-QVHIDVTGNA-N, DLSSNGXYKOETMU-QPOHJTKGNA-N, DPRVDSVKDBOKKQ-GEECITGANA-N, DQCKXKSZWLBEJN-HIVJQADWNA-N, DQNJOVJIFCFOTK-XZBVEBPXNA-N, FCRBXBWORRJNMH-MRKGEEK…	C41H72O5	1	M+H --- M+NH4	662.567		7.73	7.67	33.6022	22.8455	100	100	0.710196	1.52456e-10	8.91062e-10	0.549099	0.000327229	0.0021243	0.826608	0.00324025	0.0171777	0.347308	0.00350403	0.0135833	0.343357	1.59278e-08	9.30934e-08
TAG 44:3	TAG	RP_PosMSMS_910, 893		Y	GL	TG 10:0_10:0_24:3 M+Na Atlas --- TG 10:0_12:0_22:3 M+Na Atlas --- TG 10:0_13:1_21:2 M+Na Atlas --- TG 10:0_14:0_20:3 M+Na Atlas --- TG 10:0_14:1_20:2 M+Na Atlas --- TG 10:0_15:1_19:2 M+Na Atlas --- TG 10:0_16:1_18:2 M+Na Atlas --- TG 10:0_16:2_18:1 M+Na Atlas --- TG 10:0_16:3_18:0 M+Na Atlas --- TG 10:0_17:1_17:2 M+Na Atlas --- TG 11:0_11:0_22:3 M+Na Atlas --- TG 11:0_13:0_20:3 M+Na Atlas --- TG …	Lipids and lipid-like molecules	Glycerolipids	Triradylcglycerols	HMDB0047886	TG(14:1(9Z)/14:1(9Z)/16:1(9Z))	Glycerolipids [GL]	Triradylglycerols [GL03]	Triacylglycerols [GL0301]	LMGL03012704 --- LMGL03012816 --- LMGL03012843 --- LMGL03013220 --- LMGL03013247 --- LMGL03013299 --- LMGL03013708	TG(12:0/14:0/18:3(9Z,12Z,15Z))[iso6] --- TG(12:0/14:1(9Z)/18:2(9Z,12Z))[iso6] --- TG(12:0/15:1(9Z)/17:2(9Z,12Z))[iso6] --- TG(13:0/13:0/18:3(9Z,12Z,15Z))[iso3] --- TG(13:0/14:1(9Z)/17:2(9Z,12Z))[iso6] --- TG(14:1(9Z)/14:1(9Z)/16:1(9Z))[iso3] --- TG(14:1(9Z)/15:1(9Z)/15:1(9Z))[iso3]	TG 44:3	TG 12:0_14:0_18:3 --- TG 12:0_14:1_18:2 --- TG 12:0_15:1_17:2 --- TG 13:0_13:0_18:3 --- TG 13:0_14:1_17:2 --- TG 14:1_14:1_16:1 --- TG 14:1_15:1_15:1	AJWJMOBQKDZHBI-DTXVDQHXNA-N, AKTVACKDALZZQG-RDQAAGPANA-N, AYDFDLNJBDNTPQ-SVOFSQQFNA-N, BDVVCQAWIGXQJD-XMRVQXCHNA-N, DAYZEYHPONPOJG-JULLPKFUNA-N, DCZYWVXXELEQFD-DLKAWBNBNA-N, DFXKIYFIQPDBTK-VGWFEZHBNA-N, FJKOKKXGRVRNFS-UVQSURNNNA-N, FMJQQNIWKBYWNY-CFIAAYGYNA-N, FNDGGFJWXLWWKI-NBKARYOKNA-N, FWDYJMBFSSEQAT-BMFOWHIUNA-N, GNFGRPRMQNZKAE-WLGLUMGENA-N, GTLNSKFCPCHGHF-RDQAAGPANA-N, GWSWSHIXUNASMW-HCVJXJE…	C47H84O6	1	M+Na, M+NH4	767.6114, 762.6555		9.37	9.325	56.1828	2.88792	100	100	0.719033	1.83882e-10	1.0643e-09	0.523959	0.000782474	0.00419388	0.867187	0.00232681	0.0130544	0.313012	0.00999083	0.0282874	0.343634	2.86212e-08	1.64065e-07
DAG 38:6	DAG	RP_PosMSMS_606		Y	GL	DG 16:0_22:6 M+NH4 Atlas	Lipids and lipid-like molecules	Glycerolipids	Diradylglycerols	HMDB0007121	DG(16:0/22:6(4Z,7Z,10Z,13Z,16Z,19Z)/0:0)	Glycerolipids [GL]	Diradylglycerols [GL02]	Diacylglycerols [GL0201]	LMGL02010162	DG(16:0/22:6(4Z,7Z,10Z,13Z,16Z,19Z)/0:0)[iso2]	DG 38:6	DG 16:0_22:6	BXVYQJJBMVVALQ-LGFBOSHVNA-N	C41H68O5	1	M+NH4	658.536		6.94	6.9	26.8817	12.0938	82.6446	100	0.713259	2.49478e-10	1.43009e-09	0.537297	0.000542688	0.00312127	0.770083	0.00704257	0.0311509	0.268056	0.0278139	0.0559294	0.339155	4.30224e-08	2.37484e-07
alpha-Tocopherol	Vitamins and cofactors	RP_PosMSMS_277			nonGL	(+)-.alpha.-Tocopherol M+H NIST --- alpha-Tocopherol M+H HMDB	Lipids and lipid-like molecules	Prenol lipids	Quinone and hydroquinone lipids	HMDB0001893	alpha-Tocopherol	Prenol Lipids [PR]	Quinones and hydroquinones [PR02]	Vitamin E [PR0202]	LMPR02020001	alpha-tocopherol			GVJHHUAWPYXKBD-IEOSBIPESA-N	C29H50O2	2	M+H	431.386	165.09	6.02	6	79.3011	5.03718	100	100	0.681838	2.79805e-10	1.58865e-09	0.529869	0.000359914	0.00229112	0.745561	0.00644107	0.0292328	0.255093	0.0289084	0.057021	0.327563	3.18394e-08	1.80775e-07
TAG 42:1	TAG	RP_PosMSMS_825		Y	GL	TG 12:0_12:0_18:1 M+NH4 Atlas --- TG 12:0_14:1_16:0 M+NH4 Atlas --- TG 8:0_16:0_18:1 M+NH4 Atlas						Glycerolipids [GL]	Triradylglycerols [GL03]	Triacylglycerols [GL0301]	LMGL03012638 --- LMGL03013240	TG(12:0/12:0/18:1(9Z))[iso3] --- TG(12:0/14:1(9Z)/16:0)[iso6]	TG 42:1	TG 12:0_12:0_18:1 --- TG 12:0_14:1_16:0	GOKZYHOGUBGXBC-DQRAZIAONA-N, KOZSAZQHBRKVPG-VKAVYKQENA-N, VHSCSWKCDUHRCW-DQRAZIAONA-N	C45H84O6	1	M+NH4	738.656		9.58	9.54	61.828	5.28945	100	100	0.695111	3.65234e-10	2.05413e-09	0.490446	0.00137339	0.0067706	0.853801	0.00220409	0.0128155	0.333273	0.00495481	0.017125	0.330204	5.84389e-08	3.16717e-07
TAG 50:2	TAG	RP_PosMSMS_1176		Y	GL	TG 16:0_16:1_18:1 M+NH4 Atlas	Lipids and lipid-like molecules	Glycerolipids	Triradylcglycerols	HMDB0005377	TG(16:0/16:1(9Z)/18:1(9Z))	Glycerolipids [GL]	Triradylglycerols [GL03]	Triacylglycerols [GL0301]	LMGL03010043	TG(16:0/16:1(9Z)/18:1(9Z))[iso6]	TG 50:2	TG 16:0_16:1_18:1	TWJCMQZMAPGUSG-BIDHIOHYNA-N	C53H98O6	2	M+NH4	848.764	577.515	10.81	10.76	98.3871	2.5263	100	100	0.700506	3.83213e-10	2.13511e-09	0.566093	0.000218071	0.00152109	0.698663	0.0138836	0.0521347	0.481213	3.69031e-05	0.000529751	0.336759	3.90906e-08	2.17797e-07
TAG 47:4	TAG	RP_PosMSMS_1044		Y	GL	TG 10:0_11:0_26:4 M+Na Atlas --- TG 10:0_13:0_24:4 M+Na Atlas --- TG 10:0_13:1_24:3 M+Na Atlas --- TG 10:0_15:0_22:4 M+Na Atlas --- TG 10:0_15:1_22:3 M+Na Atlas --- TG 10:0_16:2_21:2 M+Na Atlas --- TG 10:0_16:3_21:1 M+Na Atlas --- TG 10:0_16:4_21:0 M+Na Atlas --- TG 10:0_17:0_20:4 M+Na Atlas --- TG 10:0_17:1_20:3 M+Na Atlas --- TG 10:0_17:2_20:2 M+Na Atlas --- TG 10:0_18:2_19:2 M+Na Atlas --- TG …	Lipids and lipid-like molecules	Glycerolipids	Triradylcglycerols	HMDB0042115, HMDB0047763	TG(14:0/15:0/18:4(6Z,9Z,12Z,15Z)) --- TG(14:1(9Z)/15:0/18:3(9Z,12Z,15Z))	Glycerolipids [GL]	Triradylglycerols [GL03]	Triacylglycerols [GL0301]	LMGL03012730 --- LMGL03012931 --- LMGL03013379 --- LMGL03013401 --- LMGL03013421 --- LMGL03013795 --- LMGL03013819 --- LMGL03014177 --- LMGL03014203 --- LMGL03014582 --- LMGL03014607 --- LMGL03014655	TG(12:0/17:0/18:4(6Z,9Z,12Z,15Z))[iso6] --- TG(12:0/17:1(9Z)/18:3(9Z,12Z,15Z))[iso6] --- TG(12:0/17:2(9Z,12Z)/18:2(9Z,12Z))[iso6] --- TG(13:0/16:0/18:4(6Z,9Z,12Z,15Z))[iso6] --- TG(13:0/16:1(9Z)/18:3(9Z,12Z,15Z))[iso6] --- TG(13:0/17:2(9Z,12Z)/17:2(9Z,12Z))[iso3] --- TG(14:0/15:0/18:4(6Z,9Z,12Z,15Z))[iso6] --- TG(14:0/15:1(9Z)/18:3(9Z,12Z,15Z))[iso6] --- TG(14:1(9Z)/15:0/18:3(9Z,12Z,15Z))[iso6] -…	TG 47:4	TG 12:0_17:0_18:4 --- TG 12:0_17:1_18:3 --- TG 12:0_17:2_18:2 --- TG 13:0_16:0_18:4 --- TG 13:0_16:1_18:3 --- TG 13:0_17:2_17:2 --- TG 14:0_15:0_18:4 --- TG 14:0_15:1_18:3 --- TG 14:1_15:0_18:3 --- TG 14:1_15:1_18:2 --- TG 14:1_16:1_17:2 --- TG 15:1_15:1_17:2	ACBXRRSBCGIQLK-VVOCGCHMNA-N, AGGOUFCXOJTWAB-HELHTZBTNA-N, ALLOHXSQTAEWRB-LTOIRAHBNA-N, ATLQDXZCUXJQKD-JWGNYCBONA-N, AYNSQUNLOYMHNS-SOPXADSZNA-N, BJTQOQAVUSVNMX-XYWOVFNHNA-N, BQFRPSQLEWACHE-IIFAJURONA-N, BTGAKCDSQDACKX-ULPBVQKINA-N, BZHFBZVNEFUTNC-KBJMEUQINA-N, CRAUDHVKWNHPNJ-ZFZSNVORNA-N, CRWOOLAPVVRSLN-HDAPDVLHNA-N, CZBILUQGFAADSB-BRLYFDGPNA-N, CZYJZIRSBKJAHW-QXJJYDIHNA-N, DDWGTOYKCCHZHI-FZNYTDG…	C50H88O6	1	M+Na	807.645		9.71	9.7	25.5376	28.062	74.3802	100	0.666848	1.40687e-09	7.76592e-09	0.600496	5.32646e-05	0.000485056	0.937372	0.00060206	0.00563736	0.374848	0.00124974	0.00669378	0.345871	5.49436e-09	3.37682e-08
CE 24:1	CE	RP_PosMS1_867		Y	nonGL	CE 24:1 M+NH4 Atlas --- SE 28:1/23:1 M+NH4 Atlas --- SE 28:2/23:0 M+NH4 Atlas --- SE 29:1/22:1 M+NH4 Atlas --- SE 29:2/22:0 M+NH4 Atlas						Sterols [ST]	Sterols [ST01]	Cholesteryl esters [ST0102]	LMST01020051 --- LMST01020083	22:0 Stigmasterol ester --- 22:1 Sitosterol ester			DEJZYHBHAOYAFB-UHFFFAOYNA-N, JWVQJSBHHUTPSN-UHFFFAOYNA-N, LEKBVMDOADSUQQ-HNENSFHCNA-N, NHTXXNHMZGOTGQ-MSUUIHNZNA-N, VBOXELVAJXPXMS-WUKNDPDINA-N	C51H90O2	1	M+NH4	752.727		12.3	12.21	32.2581	20.5702	56.1983	100	0.673008	1.95606e-09	1.06984e-08	0.504185	0.00101326	0.00515014	0.773113	0.00594018	0.0276309	0.357716	0.00253727	0.0107477	0.322	1.52831e-07	7.92278e-07
TAG 52:2	TAG	RP_PosMSMS_1271, 1284		Y	GL	TG 16:0_18:1_18:1 M+NH4 Atlas, TG 16:0_18:1_18:1 M+Na Atlas	Lipids and lipid-like molecules	Glycerolipids	Triradylcglycerols	HMDB0005382	TG(16:0/18:1(9Z)/18:1(9Z))	Glycerolipids [GL]	Triradylglycerols [GL03]	Triacylglycerols [GL0301]	LMGL03010100	TG(16:0/18:1(9Z)/18:1(9Z))[iso3]	TG 52:2	TG 16:0_18:1_18:1	JFISYPWOVQNHLS-LBXGSASVNA-N	C55H102O6	2	M+NH4, M+Na	876.7949, 881.7509	313.2702, 625.5117	11.13	11.08	98.1183	3.36632	99.1736	100	0.674004	2.02527e-09	1.09762e-08	0.40369	0.00943264	0.0310948	0.50716	0.0753484	0.167154	0.394002	0.00084844	0.00528268	0.290507	3.33089e-06	1.42859e-05
Estrone	ST - Steroids	HILIC_PosMS1_711	RT_2	Y	nonGL	Estriol; LC-APPI-QQ; MS2; CE M-2H2O+H MassBank --- Estrone M+H-H2O NIST --- Estrone; LC-APPI-QQ; MS2; CE M-H2O+H MassBank	Lipids and lipid-like molecules	Steroids and steroid derivatives	Estrane steroids	HMDB0000145	Estrone	Sterols [ST]	Steroids [ST02]	C18 steroids (estrogens) and derivatives [ST0201]	LMST02010004	Estrone	ST 18:4;O2		DNXHEGUUPJUMQT-CBZIJGRNSA-N, DNXHEGUUPJUMQT-UHFFFAOYNA-N, PROQIPRRNZUXQM-SBZGPEHISA-N	C18H22O2	1	M+H-H2O --- M-2H2O+H --- M-H2O+H	253.156		10.41	10.3	51.0811	15.3022	59.6639	100	-0.674996	2.27784e-09	1.22339e-08	-0.368824	0.0185637	0.0536197	-0.770166	0.00648546	0.0292328	-0.351412	0.00324709	0.0128095	-0.298671	1.78614e-06	8.00623e-06
TAG 47:0	TAG	RP_PosMSMS_1059		Y	GL	TG 15:0_16:0_16:0 M+NH4 Atlas	Lipids and lipid-like molecules	Glycerolipids	Triradylcglycerols	HMDB0043019, HMDB0104090	TG(15:0/16:0/16:0) --- TG(16:0/16:0/15:0)	Glycerolipids [GL]	Triradylglycerols [GL03]	Triacylglycerols [GL0301]	LMGL03012900	TG(15:0/16:0/16:0)[iso3]	TG 47:0	TG 15:0_16:0_16:0	BLIGKERFCBUUQF-UHFFFAOYNA-N	C50H96O6	1	M+NH4	810.749		10.87	10.82	60.2151	18.7481	95.0413	100	0.668523	2.35094e-09	1.25137e-08	0.523581	0.000599982	0.00336231	0.746292	0.0078393	0.0337993	0.426635	0.000259178	0.00202939	0.322692	1.30046e-07	6.86089e-07
TAG 55:9	TAG	RP_PosMS1_1343		Y	GL	TG 10:0_11:0_34:9 M+NH4 Atlas --- TG 10:0_13:0_32:9 M+NH4 Atlas --- TG 10:0_13:1_32:8 M+NH4 Atlas --- TG 10:0_15:1_30:8 M+NH4 Atlas --- TG 10:0_17:2_28:7 M+NH4 Atlas --- TG 10:0_19:2_26:7 M+NH4 Atlas --- TG 11:0_12:0_32:9 M+NH4 Atlas --- TG 11:0_14:1_30:8 M+NH4 Atlas --- TG 11:0_16:2_28:7 M+NH4 Atlas --- TG 11:0_16:3_28:6 M+NH4 Atlas --- TG 11:0_16:4_28:5 M+NH4 Atlas --- TG 11:0_18:2_26:7 M+NH4 A…	Lipids and lipid-like molecules	Glycerolipids	Triradylcglycerols	HMDB0043654, HMDB0043682, HMDB0043710	TG(15:0/18:3(9Z,12Z,15Z)/22:6(4Z,7Z,10Z,13Z,16Z,19Z)) --- TG(15:0/18:4(6Z,9Z,12Z,15Z)/22:5(7Z,10Z,13Z,16Z,19Z)) --- TG(15:0/20:4(8Z,11Z,14Z,17Z)/20:5(5Z,8Z,11Z,14Z,17Z))	Glycerolipids [GL]	Triradylglycerols [GL03]	Triacylglycerols [GL0301]	LMGL03010681 --- LMGL03010682 --- LMGL03010854 --- LMGL03013088 --- LMGL03015219 --- LMGL03015234 --- LMGL03015535 --- LMGL03015569 --- LMGL03015941	TG(15:0/18:3(9Z,12Z,15Z)/22:6(4Z,7Z,10Z,13Z,16Z,19Z))[iso6] --- TG(15:0/18:4(6Z,9Z,12Z,15Z)/22:5(7Z,10Z,13Z,16Z,19Z))[iso6] --- TG(15:1(9Z)/18:2(9Z,12Z)/22:6(4Z,7Z,10Z,13Z,16Z,19Z))[iso6] --- TG(15:1(9Z)/18:3(9Z,12Z,15Z)/22:5(7Z,10Z,13Z,16Z,19Z))[iso6] --- TG(16:1(9Z)/17:2(9Z,12Z)/22:6(4Z,7Z,10Z,13Z,16Z,19Z))[iso6] --- TG(17:0/18:4(6Z,9Z,12Z,15Z)/20:5(5Z,8Z,11Z,14Z,17Z))[iso6] --- TG(17:1(9Z)/18:…	TG 55:9	TG 15:0_18:3_22:6 --- TG 15:0_18:4_22:5 --- TG 15:1_18:2_22:6 --- TG 15:1_18:3_22:5 --- TG 16:1_17:2_22:6 --- TG 17:0_18:4_20:5 --- TG 17:1_18:3_20:5 --- TG 17:2_18:2_20:5 --- TG 18:4_18:4_19:1	ACNNTKLSZQQQKP-FXZWXQSANA-N, AFDJUNKTFRBTJR-MSPREIMINA-N, AFHMLHSZVWBZQC-XRCPUKGLNA-N, AFKHNQOTUOVPSY-MZYYPCICNA-N, ANMCRRUWKDVICV-CUPNEJRENA-N, APSWDBMMSAVNIL-XDTAQBNDNA-N, BASBBLAEGLYGFW-WJWRZQCENA-N, BHFNPIFQXGSRRM-JYWNAVNUNA-N, BNVVILLZZXJTHL-IPXNLGCINA-N, BOJASBUDPYZVEN-FIAMGHDUNA-N, BRBIBAKHCVJZSR-PBWZYCNBNA-N, CBCJXQJAYSAQTE-HAHICZMCNA-N, CNDQEKIUKYBQHM-HCKPUZORNA-N, CRHQNGLILBZGOE-FKDQBZN…	C58H94O6	1	M+NH4	904.738		10.68	10.66	99.1935	3.85491	100	100	0.64731	2.97563e-09	1.56987e-08	0.464838	0.00186036	0.00859004	0.766832	0.00489984	0.0235515	0.219727	0.0600742	0.0954628	0.307417	2.64223e-07	1.33491e-06
TAG 61:14	TAG	RP_PosMS1_1498		Y	GL	TG 11:0_18:5_32:9 M+NH4 Atlas --- TG 13:1_16:4_32:9 M+NH4 Atlas --- TG 13:1_18:5_30:8 M+NH4 Atlas --- TG 13:1_22:6_26:7 M+NH4 Atlas --- TG 17:2_18:5_26:7 M+NH4 Atlas --- TG 17:2_22:6_22:6 M+NH4 Atlas --- TG 9:0_16:4_36:10 M+NH4 Atlas --- TG 9:0_18:5_34:9 M+NH4 Atlas --- TG 9:0_20:5_32:9 M+NH4 Atlas --- TG 9:0_22:6_30:8 M+NH4 Atlas --- TG 9:0_26:7_26:7 M+NH4 Atlas						Glycerolipids [GL]	Triradylglycerols [GL03]	Triacylglycerols [GL0301]	LMGL03012328	TG(17:2(9Z,12Z)/22:6(4Z,7Z,10Z,13Z,16Z,19Z)/22:6(4Z,7Z,10Z,13Z,16Z,19Z))[iso3]	TG 61:14	TG 17:2_22:6_22:6	BUQSICXPXHSLNR-FOLOWWGDNA-N, CRVSQBCFRRGTLT-SBLODSJVNA-N, DFHPEUTWSRPZFY-XKWFAAGPNA-N, FEDWBODUGZGIDK-BJMXYLMWNA-N, HVZROCBNDZWFIX-YLKOBFCRNA-N, OAYKUEKHQQLGLI-DWNOLNOCNA-N, RGXXZWVMQDLPCC-BLLUPCHVNA-N, SIBFXEWHMQKTCB-OFJQWFTGNA-N, SQZPMPQQCNFJTH-KGGHHUIHNA-N, XOMJSQWYDLBSEJ-FUSTUJEONA-N, YSBAGIBTUPAEDC-UBCJNKMBNA-N	C64H96O6	1	M+NH4	978.754		10.62	10.6	66.6667	28.3425	95.8678	100	-0.676308	3.70036e-09	1.9351e-08	-0.591601	0.000131194	0.00103639	-1.34251	9.2836e-07	0.000248787	-0.29062	0.0171731	0.0407103	-0.368576	1.5699e-09	9.95651e-09
TAG 52:0	TAG	RP_PosMSMS_1292		Y	GL	TG 16:0_18:0_18:0 M+Na Atlas	Lipids and lipid-like molecules	Glycerolipids	Triradylcglycerols	HMDB0005365, HMDB0108596	TG(16:0/18:0/18:0) --- TG(18:0/18:0/16:0)	Glycerolipids [GL]	Triradylglycerols [GL03]	Triacylglycerols [GL0301]	LMGL03010069	TG(16:0/18:0/18:0)[iso3]	TG 52:0	TG 16:0_18:0_18:0	SDNYRTVJOFMYIW-UHFFFAOYNA-N	C55H106O6	1	M+Na	885.782		11.65	11.63	67.2043	28.6564	77.686	100	0.649123	3.89486e-09	2.0191e-08	0.481861	0.00136398	0.0067706	1.08621	5.24847e-05	0.000995809	0.327928	0.0048615	0.0170909	0.327917	3.86342e-08	2.17285e-07
TAG 55:6	TAG	RP_PosMS1_1372		Y	GL	TG 10:0_11:0_34:6 M+Na Atlas --- TG 10:0_13:0_32:6 M+Na Atlas --- TG 10:0_13:1_32:5 M+Na Atlas --- TG 10:0_15:0_30:6 M+Na Atlas --- TG 10:0_15:1_30:5 M+Na Atlas --- TG 10:0_17:0_28:6 M+Na Atlas --- TG 10:0_17:1_28:5 M+Na Atlas --- TG 10:0_17:2_28:4 M+Na Atlas --- TG 10:0_19:0_26:6 M+Na Atlas --- TG 10:0_19:1_26:5 M+Na Atlas --- TG 10:0_19:2_26:4 M+Na Atlas --- TG 10:0_21:0_24:6 M+Na Atlas --- TG …	Lipids and lipid-like molecules	Glycerolipids	Triradylcglycerols	HMDB0043074, HMDB0043276, HMDB0043304, HMDB0043477, HMDB0043675	TG(15:0/18:0/22:6(4Z,7Z,10Z,13Z,16Z,19Z)) --- TG(15:0/18:1(9Z)/22:5(7Z,10Z,13Z,16Z,19Z)) --- TG(15:0/20:1(11Z)/20:5(5Z,8Z,11Z,14Z,17Z)) --- TG(15:0/20:2n6/20:4(8Z,11Z,14Z,17Z)) --- TG(15:0/18:4(6Z,9Z,12Z,15Z)/22:2(13Z,16Z))	Glycerolipids [GL]	Triradylglycerols [GL03]	Triacylglycerols [GL0301]	LMGL03010482 --- LMGL03010488 --- LMGL03010489 --- LMGL03010504 --- LMGL03010505 --- LMGL03010577 --- LMGL03010588 --- LMGL03010617 --- LMGL03010646 --- LMGL03010647 --- LMGL03010648 --- LMGL03013650 --- LMGL03014058 --- LMGL03014069 --- LMGL03014466 --- LMGL03014479 --- LMGL03014871 --- LMGL03014942 --- LMGL03015145 --- LMGL03015164 --- LMGL03015216 --- LMGL03015231 --- LMGL03015281 --- LMGL0301…	TG(12:0/21:0/22:6(4Z,7Z,10Z,13Z,16Z,19Z))[iso6] --- TG(13:0/20:0/22:6(4Z,7Z,10Z,13Z,16Z,19Z))[iso6] --- TG(13:0/20:1(11Z)/22:5(7Z,10Z,13Z,16Z,19Z))[iso6] --- TG(14:0/19:0/22:6(4Z,7Z,10Z,13Z,16Z,19Z))[iso6] --- TG(14:0/19:1(9Z)/22:5(7Z,10Z,13Z,16Z,19Z))[iso6] --- TG(14:1(9Z)/19:0/22:5(7Z,10Z,13Z,16Z,19Z))[iso6] --- TG(14:1(9Z)/20:5(5Z,8Z,11Z,14Z,17Z)/21:0)[iso6] --- TG(15:0/18:0/22:6(4Z,7Z,10Z,13Z…	TG 55:6	TG 12:0_21:0_22:6 --- TG 13:0_20:0_22:6 --- TG 13:0_20:1_22:5 --- TG 14:0_19:0_22:6 --- TG 14:0_19:1_22:5 --- TG 14:1_19:0_22:5 --- TG 14:1_20:5_21:0 --- TG 15:0_18:0_22:6 --- TG 15:0_18:1_22:5 --- TG 15:0_18:3_22:3 --- TG 15:0_18:4_22:2 --- TG 15:0_20:1_20:5 --- TG 15:1_18:0_22:5 --- TG 15:1_18:2_22:3 --- TG 15:1_18:3_22:2 --- TG 15:1_20:0_20:5 --- TG 16:0_17:0_22:6 --- TG 16:0_17:1_22:5 --- TG …	ABVFGTCLJUKRIA-ABBHDXQHNA-N, ADSGBFZVHUICFT-LAAQUQGFNA-N, AEIUBYXPUKPTST-SRHLIFMDNA-N, AFOLAZWOEZYEBM-WORGPQJDNA-N, AFZMMZHPURNETO-ILQMLUOONA-N, AIHQNDDTAHSVDF-DXLDMHPINA-N, ALSVWLITJYRXIR-QMQNYPBMNA-N, ANKLIVASCTZPIV-MFCSRANONA-N, AOPDUXKFFUJBBX-SMHOWZPCNA-N, AQHMONKBUMHDLN-KHJOMZKVNA-N, ASDMDHHDQSFVOW-QWVNLIPINA-N, AVHLUYSQTCFVEQ-RQNKUGRMNA-N, AXZZYCNJUIBPOJ-JSYRWOKNNA-N, AYBHYHWZXOVRGB-MICCPEP…	C58H100O6	1	M+Na	915.736		10.65	10.66	62.9032	28.0794	80.9917	100	-0.647883	1.06945e-08	5.49621e-08	-0.535365	0.000465599	0.00280382	-0.756468	0.0072366	0.0316212	-0.363653	0.00215738	0.00969483	-0.319399	2.08374e-07	1.0709e-06
TAG 54:7	TAG	RP_PosMSMS_1322, 1331		Y	GL	TG 16:0_18:2_20:5 M+NH4 Atlas --- TG 16:1_18:2_20:4 M+NH4 Atlas --- TG 18:1_18:3_18:3 M+NH4 Atlas --- TG 18:2_18:2_18:3 M+NH4 Atlas, TG 16:0_18:2_20:5 M+Na Atlas --- TG 18:1_18:3_18:3 M+Na Atlas --- TG 18:2_18:2_18:3 M+Na Atlas	Lipids and lipid-like molecules	Glycerolipids	Triradylcglycerols	HMDB0010490, HMDB0048760, HMDB0050174, HMDB0044273	TG(18:2(9Z,12Z)/18:2(9Z,12Z)/18:3(9Z,12Z,15Z)) --- TG(16:0/18:2(9Z,12Z)/20:5(5Z,8Z,11Z,14Z,17Z)) --- TG(16:1(9Z)/18:2(9Z,12Z)/20:4(8Z,11Z,14Z,17Z)) --- TG(18:1(9Z)/18:3(9Z,12Z,15Z)/18:3(9Z,12Z,15Z))	Glycerolipids [GL]	Triradylglycerols [GL03]	Triacylglycerols [GL0301]	LMGL03010419 --- LMGL03010420 --- LMGL03010451	TG(16:0/18:2(9Z,12Z)/20:5(5Z,8Z,11Z,14Z,17Z))[iso6] --- TG(18:1(9Z)/18:3(9Z,12Z,15Z)/18:3(9Z,12Z,15Z))[iso3] --- TG(18:2(9Z,12Z)/18:2(9Z,12Z)/18:3(9Z,12Z,15Z))[iso3]	TG 54:7	TG 16:0_18:2_20:5 --- TG 18:1_18:3_18:3 --- TG 18:2_18:2_18:3	NGPHUAVENUDDAO-JZRYOQFWNA-N, NSPUDLQBMLPYGF-KXXVTNCTNA-N, PRMRBZVOTCJWQD-XCQZEREDNA-N, RTHDUZGGPUMUEU-HSCVSFFSNA-N, NGPHUAVENUDDAO-JZRYOQFWNA-N, NSPUDLQBMLPYGF-KXXVTNCTNA-N, RTHDUZGGPUMUEU-HSCVSFFSNA-N	C57H96O6	1	M+NH4, M+Na	894.7469, 899.7053		10.18	10.165	75.2688	2.17822	99.1736	100	0.655328	1.19054e-08	6.06625e-08	0.448036	0.00430336	0.0168957	0.618409	0.0316261	0.0908445	0.183546	0.134639	0.153598	0.298865	2.23682e-06	9.95151e-06
TAG 42:2	TAG	RP_PosMSMS_818		Y	GL	TG 8:0_16:0_18:2 M+NH4 Atlas													HANCQHITNUBWIC-RDTMPOLENA-N	C45H82O6	1	M+NH4	736.64		9.23	9.18	41.9355	5.97059	100	100	0.656984	1.35832e-08	6.86251e-08	0.494297	0.00164909	0.00777886	0.806167	0.00493262	0.023552	0.332986	0.0061628	0.0205474	0.317443	4.73551e-07	2.33316e-06
TAG 43:2	TAG	RP_PosMSMS_862		Y	GL	TG 9:0_16:0_18:2 M+NH4 Atlas													ZXLKMKXFKYCCOB-TVHMIOOGNA-N	C46H84O6	1	M+NH4	750.654		9.45	9.41	42.2043	7.25769	99.1736	100	0.654181	1.40303e-08	7.02882e-08	0.495336	0.00154711	0.00740434	0.879367	0.00199028	0.0120585	0.31712	0.00898677	0.0268747	0.320719	3.0906e-07	1.53541e-06
TAG 40:0	TAG	RP_PosMSMS_741		Y	GL	TG 10:0_14:0_16:0 M+NH4 Atlas --- TG 12:0_12:0_16:0 M+NH4 Atlas --- TG 12:0_14:0_14:0 M+NH4 Atlas --- TG 8:0_16:0_16:0 M+NH4 Atlas	NA --- Lipids and lipid-like molecules	NA --- Glycerolipids	NA --- Triradylcglycerols	HMDB0071634, HMDB0071914, HMDB0094986, HMDB0095256, HMDB0099325, HMDB0103498, HMDB0103606, HMDB0103899	TG(10:0/14:0/16:0) --- TG(8:0/16:0/16:0) --- TG(12:0/12:0/16:0) --- TG(12:0/14:0/14:0) --- TG(14:0/14:0/12:0) --- TG(16:0/16:0/8:0) --- TG(16:0/12:0/12:0) --- TG(16:0/14:0/10:0)	Glycerolipids [GL]	Triradylglycerols [GL03]	Triacylglycerols [GL0301]	LMGL03012632 --- LMGL03012660	TG(12:0/12:0/16:0)[iso3] --- TG(12:0/14:0/14:0)[iso3]	TG 40:0	TG 12:0_12:0_16:0 --- TG 12:0_14:0_14:0	RFWJYKONNDGWCW-UHFFFAOYNA-N, SMIGULGEODNQEX-UHFFFAOYNA-N, UGBCBXMLXHJYBS-UHFFFAOYNA-N, XTHFMIVZMLNNFC-UHFFFAOYNA-N	C43H82O6	1	M+NH4	712.64		9.52	9.47	84.6774	5.6845	100	100	0.628563	2.10729e-08	1.0469e-07	0.443352	0.00366311	0.0148259	0.845062	0.0022229	0.0128214	0.269757	0.0226863	0.0484462	0.302452	7.47751e-07	3.56623e-06
TAG 59:8	TAG	RP_PosMS1_1466		Y	GL	TG 10:0_11:0_38:8 M+NH4 Atlas --- TG 10:0_13:0_36:8 M+NH4 Atlas --- TG 10:0_13:1_36:7 M+NH4 Atlas --- TG 10:0_15:0_34:8 M+NH4 Atlas --- TG 10:0_15:1_34:7 M+NH4 Atlas --- TG 10:0_17:0_32:8 M+NH4 Atlas --- TG 10:0_17:1_32:7 M+NH4 Atlas --- TG 10:0_17:2_32:6 M+NH4 Atlas --- TG 10:0_19:0_30:8 M+NH4 Atlas --- TG 10:0_19:1_30:7 M+NH4 Atlas --- TG 10:0_19:2_30:6 M+NH4 Atlas --- TG 10:0_21:1_28:7 M+NH4 A…	Lipids and lipid-like molecules	Glycerolipids	Triradylcglycerols	HMDB0043567	TG(15:0/22:2(13Z,16Z)/22:6(4Z,7Z,10Z,13Z,16Z,19Z))	Glycerolipids [GL]	Triradylglycerols [GL03]	Triacylglycerols [GL0301]	LMGL03011429 --- LMGL03011495 --- LMGL03011532 --- LMGL03011533 --- LMGL03011539 --- LMGL03011540 --- LMGL03011541 --- LMGL03011588 --- LMGL03011629 --- LMGL03011686 --- LMGL03011694 --- LMGL03015349 --- LMGL03015351 --- LMGL03015699 --- LMGL03016273 --- LMGL03016339 --- LMGL03016579 --- LMGL03016729	TG(15:0/22:2(13Z,16Z)/22:6(4Z,7Z,10Z,13Z,16Z,19Z))[iso6] --- TG(15:0/22:3(10Z,13Z,16Z)/22:5(7Z,10Z,13Z,16Z,19Z))[iso6] --- TG(15:1(9Z)/22:2(13Z,16Z)/22:5(7Z,10Z,13Z,16Z,19Z))[iso6] --- TG(17:0/20:2(11Z,14Z)/22:6(4Z,7Z,10Z,13Z,16Z,19Z))[iso6] --- TG(17:0/20:5(5Z,8Z,11Z,14Z,17Z)/22:3(10Z,13Z,16Z))[iso6] --- TG(17:1(9Z)/20:1(11Z)/22:6(4Z,7Z,10Z,13Z,16Z,19Z))[iso6] --- TG(17:1(9Z)/20:2(11Z,14Z)/22:5(…	TG 59:8	TG 15:0_22:2_22:6 --- TG 15:0_22:3_22:5 --- TG 15:1_22:2_22:5 --- TG 17:0_20:2_22:6 --- TG 17:0_20:5_22:3 --- TG 17:1_20:1_22:6 --- TG 17:1_20:2_22:5 --- TG 17:1_20:5_22:2 --- TG 17:2_20:0_22:6 --- TG 17:2_20:1_22:5 --- TG 17:2_20:5_22:1 --- TG 18:1_19:1_22:6 --- TG 18:2_19:0_22:6 --- TG 18:2_19:1_22:5 --- TG 18:3_19:0_22:5 --- TG 18:3_20:5_21:0 --- TG 18:4_19:1_22:3 --- TG 19:1_20:2_20:5	AEELDPMRADELIH-PFNHKVEQNA-N, AFHBGSGQFFFURP-KTJJLZDQNA-N, AFIWMMSQVGMVEV-VLCCJKMUNA-N, AFMRLJGWCDXNNC-KNTBPWTJNA-N, AHGNNSGFOJPNRQ-QBGLOVRRNA-N, AJEUYLBUCQRMPN-AQMJPTKHNA-N, AKZQDKRHDVAYKK-JVRNSECENA-N, ALLBAZDQPHKBFH-ZERKZXFBNA-N, AOBBJLILFAHBBR-KIMDHDNLNA-N, ASFXENQYLWTDSY-YHYFMMNGNA-N, AVOFIQXLCNOMQJ-AEGNTQFJNA-N, AYTKPAIVVJIWEZ-IQQSWGIBNA-N, BACQMVWFDBMHAG-SMTVNIRVNA-N, BANBYWDZERTPSD-PGFNWPO…	C62H104O6	1	M+NH4	962.817		11.59	11.53	67.7419	9.71708	99.1736	100	0.600706	2.39917e-08	1.18206e-07	0.377546	0.0102539	0.0331191	0.706809	0.00803619	0.0342839	0.277503	0.0142767	0.0351333	0.275588	3.04516e-06	1.31551e-05
DAG 42:11	DAG	RP_PosMS1_721		Y	GL	DG 16:4_26:7 M+NH4 Atlas --- DG 18:5_24:6 M+NH4 Atlas --- DG 20:5_22:6 M+NH4 Atlas --- HexCer 10:0;3O/22:1;(2OH) M+H Atlas --- HexCer 11:0;3O/21:1;(2OH) M+H Atlas --- HexCer 12:0;3O/20:1;(2OH) M+H Atlas --- HexCer 12:1;3O/20:0;(2OH) M+H Atlas --- HexCer 13:0;3O/19:1;(2OH) M+H Atlas --- HexCer 13:1;3O/19:0;(2OH) M+H Atlas --- HexCer 14:0;3O/18:1;(2OH) M+H Atlas --- HexCer 14:1;3O/18:0;(2OH) M+H At…	Lipids and lipid-like molecules	Glycerolipids	Diradylglycerols	HMDB0007585	DG(20:5(5Z,8Z,11Z,14Z,17Z)/22:6(4Z,7Z,10Z,13Z,16Z,19Z)/0:0)	Glycerolipids [GL]	Diradylglycerols [GL02]	Diacylglycerols [GL0201]	LMGL02010286	DG(20:5(5Z,8Z,11Z,14Z,17Z)/22:6(4Z,7Z,10Z,13Z,16Z,19Z)/0:0)[iso2]	DG 42:11	DG 20:5_22:6	AABHFILSOBBERE-BENRWUELNA-N, ACOCYHPYVNUQGK-NTMALXAHNA-N, ADDJHLSLCRHXDN-NMZONHKPNA-N, ADDLMWZTUCWJJX-NXVVXOECNA-N, AENCJPCITCAMIO-QOCHGBHMNA-N, BCBLWGUQGUIQPN-QBFSEMIENA-N, BNTOAGFBOCQGHS-HTXNQAPBNA-N, CATVJZIJPKZESO-YPKPFQOONA-N, CBDVLYMQIRLLFB-HTXNQAPBNA-N, DAUDQYOUXHAUAM-BBBVJDBHNA-N, DGQDLQXHXDNNNT-PFONDFGANA-N, DHVJJHUGLYUDGL-HSBBONCLNA-N, DOSZVKNJNYWXEF-HHZQUEMLNA-N, DUVDHEAUMPYXME-KUXGMSQ…	C45H66O5	1	M+H --- M+NH4	704.526		8.66	8.61	38.172	8.30233	67.7686	100	0.64489	2.43447e-08	1.18962e-07	0.542342	0.000486791	0.00286805	0.807566	0.00469056	0.0228502	0.413743	0.000542064	0.00350164	0.322486	2.57198e-07	1.31052e-06
TAG 53:8	TAG	RP_PosMS1_1274		Y	GL	TG 10:0_11:0_32:8 M+NH4 Atlas --- TG 10:0_13:0_30:8 M+NH4 Atlas --- TG 10:0_13:1_30:7 M+NH4 Atlas --- TG 10:0_15:1_28:7 M+NH4 Atlas --- TG 10:0_17:1_26:7 M+NH4 Atlas --- TG 10:0_17:2_26:6 M+NH4 Atlas --- TG 10:0_19:2_24:6 M+NH4 Atlas --- TG 10:0_21:2_22:6 M+NH4 Atlas --- TG 11:0_12:0_30:8 M+NH4 Atlas --- TG 11:0_14:1_28:7 M+NH4 Atlas --- TG 11:0_16:1_26:7 M+NH4 Atlas --- TG 11:0_16:2_26:6 M+NH4 A…	Lipids and lipid-like molecules	Glycerolipids	Triradylcglycerols	HMDB0043652, HMDB0043680	TG(15:0/18:3(9Z,12Z,15Z)/20:5(5Z,8Z,11Z,14Z,17Z)) --- TG(15:0/18:4(6Z,9Z,12Z,15Z)/20:4(8Z,11Z,14Z,17Z))	Glycerolipids [GL]	Triradylglycerols [GL03]	Triacylglycerols [GL0301]	LMGL03010328 --- LMGL03010360 --- LMGL03013002 --- LMGL03013965 --- LMGL03013999 --- LMGL03014340 --- LMGL03014724 --- LMGL03014745 --- LMGL03015211 --- LMGL03015406 --- LMGL03015527 --- LMGL03016014 --- LMGL03016072	TG(13:0/18:2(9Z,12Z)/22:6(4Z,7Z,10Z,13Z,16Z,19Z))[iso6] --- TG(13:0/18:3(9Z,12Z,15Z)/22:5(7Z,10Z,13Z,16Z,19Z))[iso6] --- TG(14:0/17:2(9Z,12Z)/22:6(4Z,7Z,10Z,13Z,16Z,19Z))[iso6] --- TG(14:1(9Z)/17:1(9Z)/22:6(4Z,7Z,10Z,13Z,16Z,19Z))[iso6] --- TG(14:1(9Z)/17:2(9Z,12Z)/22:5(7Z,10Z,13Z,16Z,19Z))[iso6] --- TG(15:0/18:3(9Z,12Z,15Z)/20:5(5Z,8Z,11Z,14Z,17Z))[iso6] --- TG(15:1(9Z)/16:1(9Z)/22:6(4Z,7Z,10Z,1…	TG 53:8	TG 13:0_18:2_22:6 --- TG 13:0_18:3_22:5 --- TG 14:0_17:2_22:6 --- TG 14:1_17:1_22:6 --- TG 14:1_17:2_22:5 --- TG 15:0_18:3_20:5 --- TG 15:1_16:1_22:6 --- TG 15:1_18:2_20:5 --- TG 16:1_17:2_20:5 --- TG 17:0_18:4_18:4 --- TG 17:1_18:3_18:4 --- TG 17:2_18:2_18:4 --- TG 17:2_18:3_18:3	AEJOXQPKYICZOL-AJNIASSTNA-N, AGMXBJVQNYUABP-KRRJXALXNA-N, AHTFYMATDZPORO-DBFCNWIONA-N, AUWRJQMRPQASLA-CQPXPODMNA-N, AVOGAWNGXTWJQN-GSKNAVDBNA-N, BCOKDAKUXUCEOI-PVSINIAANA-N, BPOLNBWBCDMNCS-DCAGAVQPNA-N, BPQKPGMFYAHUFN-NDQPWSTRNA-N, BSOPKHNYWLNQBN-AHONIWKPNA-N, BUJGHKFUDWYNAV-VDNLUATBNA-N, BZHOMLVCFOVEMA-BGHFZHFFNA-N, CBLCEFJCIWAGEF-ZVKMGAIXNA-N, CCJLNEACXLJCOH-ZSXTVTQCNA-N, CJGIMXAFLILVQU-FNRHTQD…	C56H92O6	1	M+NH4	878.723		10.58	10.54	99.7312	3.23863	100	100	0.643672	2.72815e-08	1.32229e-07	0.52775	0.000715357	0.00390866	0.645973	0.0250641	0.0788413	0.352306	0.00357161	0.0136723	0.310979	8.0791e-07	3.79247e-06
TAG 48:0	TAG	RP_PosMSMS_1105		Y	GL	TG 16:0_16:0_16:0 M+NH4 Atlas	Lipids and lipid-like molecules	Glycerolipids	Triradylcglycerols	HMDB0005356	TG(16:0/16:0/16:0)	Glycerolipids [GL]	Triradylglycerols [GL03]	Triacylglycerols [GL0301]	LMGL03010001	TG(16:0/16:0/16:0)	TG 48:0	TG 16:0_16:0_16:0	PVNIQBQSYATKKL-UHFFFAOYSA-N	C51H98O6	2	M+NH4	824.764	579.532	11.06	11.02	97.5806	20.5753	99.1736	100	0.624875	3.32039e-08	1.59636e-07	0.503127	0.00096519	0.00496693	0.687126	0.014329	0.0532525	0.410542	0.000435671	0.00300199	0.303476	8.07148e-07	3.79247e-06
TAG 56:4	TAG	RP_PosMSMS_1406, 1415		Y	GL	TG 18:1_18:2_20:1 M+NH4 Atlas, TG 18:0_18:1_20:3 M+Na Atlas --- TG 18:1_18:2_20:1 M+Na Atlas	Lipids and lipid-like molecules	Glycerolipids	Triradylcglycerols	HMDB0005460	TG(18:1(9Z)/18:2(9Z,12Z)/20:1(11Z))	Glycerolipids [GL]	Triradylglycerols [GL03]	Triacylglycerols [GL0301]	LMGL03010538	TG(18:1(9Z)/18:2(9Z,12Z)/20:1(11Z))[iso6]	TG 56:4	TG 18:1_18:2_20:1	YONCDTJKIZDSKQ-JALPFGDRNA-N, JRSOEXBBHGXQPU-YMXOETFQNA-N, YONCDTJKIZDSKQ-JALPFGDRNA-N	C59H106O6	1	M+NH4, M+Na	928.8248, 933.7813		11.25	11.18	71.5054	11.0864	76.0331	100	0.623931	4.10365e-08	1.95715e-07	0.505039	0.000969643	0.00496693	0.911426	0.00104412	0.00818548	0.314703	0.00817077	0.0255912	0.315478	2.80906e-07	1.40727e-06
PC 37:0	PC	RP_PosMSMS_1107		Y	nonGL	NAGly 26:7/26:4 M+H Atlas --- NAGlySer 18:3/26:4 M+NH4 Atlas --- NAGlySer 18:5/26:2 M+NH4 Atlas --- NAGlySer 20:3/24:4 M+NH4 Atlas --- NAGlySer 20:5/24:2 M+NH4 Atlas --- NAGlySer 22:2/22:5 M+NH4 Atlas --- NAGlySer 22:3/22:4 M+NH4 Atlas --- NAGlySer 22:4/22:3 M+NH4 Atlas --- NAGlySer 22:5/22:2 M+NH4 Atlas --- NAGlySer 22:6/22:1 M+NH4 Atlas --- NAGlySer 24:3/20:4 M+NH4 Atlas --- NAGlySer 24:4/20:3 …						Glycerophospholipids [GP]	Glycerophosphocholines [GP01]	Diacylglycerophosphocholines [GP0101]	LMGP01011590	PC(18:0/19:0)	PC 37:0	PC 18:0_19:0	CFTNFZPEPYFOEZ-JDKQWUNENA-N, FDOSHGWBEDHFDD-OIZFGRNMNA-N, GYQYQOZEAIMJRF-OAHMSRQJNA-N, IFJJJCCHAXWTHR-UHFFFAOYNA-N, IZJOANRZHZRHMS-UHFFFAOYNA-N, LMRWLDLVMPCCNM-VKBWLZLZNA-N, LWNJFMDTPCUCKU-ZBDVQUTONA-N, OMPSQNZISYVMFA-BPWHAQPVNA-N, PGICGQDUDVKUEU-GDWOKDOXNA-N, QEDUPJSSSYDLSW-ATUHWPGSNA-N, QFDWQPQJMSDLRK-XKXAXSNGNA-N, QLBQTMUVQNECNS-YYCJEVCSNA-N, QURHJRUOWAZLHJ-ABKIDBDBNA-N, QZEBOMQLRWDGMO-GPDILFH…	C45H90NO8P	1	M+H --- M+NH4 --- M+Na	826.624		7.5	7.51	66.6667	4.23446	96.6942	100	-0.633923	4.32343e-08	2.0456e-07	-0.6036	8.68957e-05	0.000739935	-0.77667	0.00652784	0.0292328	-0.385773	0.00129621	0.00671375	-0.32845	1.31908e-07	6.89809e-07
TAG O-54:2	TAG-O	RP_PosMS1_1326		Y	GL	TG O-10:0_22:0_22:2 M+Na Atlas --- TG O-10:0_22:1_22:1 M+Na Atlas --- TG O-12:0_20:0_22:2 M+Na Atlas --- TG O-12:0_20:1_22:1 M+Na Atlas --- TG O-12:0_20:2_22:0 M+Na Atlas --- TG O-14:0_18:0_22:2 M+Na Atlas --- TG O-14:0_18:1_22:1 M+Na Atlas --- TG O-14:0_18:2_22:0 M+Na Atlas --- TG O-14:0_20:0_20:2 M+Na Atlas --- TG O-14:0_20:1_20:1 M+Na Atlas --- TG O-14:1_18:0_22:1 M+Na Atlas --- TG O-14:1_18:1…	Lipids and lipid-like molecules	Glycerolipids --- Fatty Acyls	Triradylcglycerols --- Lineolic acids and derivatives	HMDB0049920, HMDB0050470, HMDB0051543, HMDB0052455, HMDB0053302, HMDB0054350	TG(18:1(9Z)/18:1(9Z)/O-18:0) --- TG(20:1(11Z)/16:1(9Z)/O-18:0) --- TG(22:1(13Z)/14:1(9Z)/O-18:0) --- TG(18:2(9Z,12Z)/18:0/O-18:0) --- TG(20:2n6/16:0/O-18:0) --- TG(22:2(13Z,16Z)/14:0/O-18:0)								AMDVXMMDUMNZSD-KIGFJTGBNA-N, ANTIYGSYVYRJNY-LVBVOWIENA-N, BEWKUNRLUXWOMY-KDAZGOSUNA-N, BFNZWFSVWCVPPI-YPAXQUSRNA-N, CBRZBNLRXZCZGU-LBXGSASVNA-N, CDLSWAWZDATCOP-DHSNEXAONA-N, CMJJSBIFDMGWSP-XWAXDLMJNA-N, CYGRMXXTHLGABG-DSOYXUETNA-N, DHEVJGKJKNWUBP-PCPMOZHJNA-N, DOBXZXJTEYLTEX-UHVUIYCVNA-N, DPGZTURRUFNLGU-YPAXQUSRNA-N, FDJGXJOYFFLTRP-MYSACRKYNA-N, FSFZSYNKVRVJGI-HBLVUIEFNA-N, FSPCXKITGCUBNT-DSOYXUE…	C57H108O5	1	M+Na	895.803		11.86	11.89	54.5699	26.7534	70.2479	100	0.603378	4.59108e-08	2.15513e-07	0.471853	0.00152283	0.00734174	1.15696	1.11605e-05	0.000318104	0.241172	0.0381031	0.0700753	0.316847	8.7913e-08	4.67948e-07
TAG 53:5	TAG	RP_PosMSMS_1304		Y	GL	TG 17:1_18:1_18:3 M+Na Atlas --- TG 17:1_18:2_18:2 M+Na Atlas --- TG 17:2_18:1_18:2 M+Na Atlas						Glycerolipids [GL]	Triradylglycerols [GL03]	Triacylglycerols [GL0301]	LMGL03010218 --- LMGL03010219 --- LMGL03010223	TG(17:1(9Z)/18:1(9Z)/18:3(9Z,12Z,15Z))[iso6] --- TG(17:1(9Z)/18:2(9Z,12Z)/18:2(9Z,12Z))[iso3] --- TG(17:2(9Z,12Z)/18:1(9Z)/18:2(9Z,12Z))[iso6]	TG 53:5	TG 17:1_18:1_18:3 --- TG 17:1_18:2_18:2 --- TG 17:2_18:1_18:2	PGBGUWBYYROWIR-GYJZPJDZNA-N, QHYAATSKYBYSLG-FLJIINBZNA-N, SJKARBJSGKSAOO-ZALINIDZNA-N	C56H98O6	1	M+Na	889.72		10.51	10.5	72.3118	19.2647	95.0413	100	0.62105	4.82855e-08	2.2489e-07	0.417303	0.00695083	0.0246002	0.564323	0.0463897	0.118185	0.345645	0.00352209	0.0135833	0.280795	6.93052e-06	2.90965e-05
DAG 40:7	DAG	RP_PosMS1_668		Y	GL	DG 10:0_30:7 M+NH4 Atlas --- DG 12:0_28:7 M+NH4 Atlas --- DG 14:0_26:7 M+NH4 Atlas --- DG 14:1_26:6 M+NH4 Atlas --- DG 16:1_24:6 M+NH4 Atlas --- DG 16:2_24:5 M+NH4 Atlas --- DG 16:3_24:4 M+NH4 Atlas --- DG 18:1_22:6 M+NH4 Atlas --- DG 18:2_22:5 M+NH4 Atlas --- DG 18:3_22:4 M+NH4 Atlas --- DG 20:2_20:5 M+NH4 Atlas --- DG 20:3_20:4 M+NH4 Atlas --- DG 22:2_18:5 M+NH4 Atlas --- DG 22:3_18:4 M+NH4 Atl…	Lipids and lipid-like molecules	Glycerolipids	Diradylglycerols	HMDB0007237, HMDB0007265, HMDB0007433	DG(18:1(9Z)/22:6(4Z,7Z,10Z,13Z,16Z,19Z)/0:0) --- DG(18:2(9Z,12Z)/22:5(7Z,10Z,13Z,16Z,19Z)/0:0) --- DG(20:2(11Z,14Z)/20:5(5Z,8Z,11Z,14Z,17Z)/0:0)	Glycerolipids [GL]	Diradylglycerols [GL02]	Diacylglycerols [GL0201]	LMGL02010198 --- LMGL02010224 --- LMGL02010225	DG(18:1(9Z)/22:6(4Z,7Z,10Z,13Z,16Z,19Z)/0:0)[iso2] --- DG(18:2(9Z,12Z)/22:5(7Z,10Z,13Z,16Z,19Z)/0:0)[iso2] --- DG(20:2(11Z,14Z)/20:5(5Z,8Z,11Z,14Z,17Z)/0:0)[iso2]	DG 40:7	DG 18:1_22:6 --- DG 18:2_22:5 --- DG 20:2_20:5	AJBCKQSBKMQAGD-CWAPQDNJNA-N, ALAVFVDPPMRKHU-ARDMRTSLNA-N, BLOBIPQTAQWYQL-IMDJYZTENA-N, BOIZUMQHKWFZFD-XOMYGGGSNA-N, BQZAGRYOZQAXSA-JNOOXXQHNA-N, BZYYERUNMFYNNB-ZARCXLEVNA-N, CKXIXXIBVQPYSX-IGKYVCMZNA-N, FNNRZRCAHILRLB-KUCZYBFWNA-N, FRZLZYBSVYONAE-LUMHLZSHNA-N, FWULZUOZGBMSDX-RDBVOOLNNA-N, GPZSDDZVLBMJQF-QYPCXAGNNA-N, HABJXYISBDYMCC-MXBGQREFNA-N, HEIJKXBAQIJVGL-GJCLIZKUNA-N, HGLCASCFTIXUJE-UDJAPEQ…	C43H70O5	1	M+H --- M+NH4	684.553		7.05	7	22.3118	25.7013	59.5041	100	0.612519	5.26946e-08	2.43523e-07	0.436831	0.00416401	0.0164471	0.69576	0.0124155	0.0491836	0.277813	0.0186474	0.0426404	0.288775	2.58827e-06	1.13458e-05
CoQ9	Vitamins and cofactors	RP_PosMSMS_1007			nonGL	CoQ9 M+H Atlas	Lipids and lipid-like molecules	Prenol lipids	Quinone and hydroquinone lipids	HMDB0247821	Ubiquinone Q9;CoQ9;Ubiquinone 9								UUGXJSBPSRROMU-UHFFFAOYSA-N	C54H82O4	1	M+H	795.624		9.37	9.34	40.5914	9.14961	98.3471	100	0.601314	7.53384e-08	3.4549e-07	0.351186	0.0212013	0.0589028	0.714335	0.00953647	0.0395153	0.299414	0.010329	0.0288535	0.271539	9.52198e-06	3.96967e-05
TAG 57:12	TAG	RP_PosMS1_1399		Y	GL	DGGA 18:0_26:2 M+NH4 Atlas --- DGGA 18:1_26:1 M+NH4 Atlas --- DGGA 20:0_24:2 M+NH4 Atlas --- DGGA 20:1_24:1 M+NH4 Atlas --- DGGA 22:0_22:2 M+NH4 Atlas --- DGGA 22:1_22:1 M+NH4 Atlas --- DGGA 23:0_21:2 M+NH4 Atlas --- DGGA 24:0_20:2 M+NH4 Atlas --- DGGA 25:0_19:2 M+NH4 Atlas --- DGGA 26:0_18:2 M+NH4 Atlas --- DGGA 27:0_17:2 M+NH4 Atlas --- TG 11:0_16:4_30:8 M+NH4 Atlas --- TG 11:0_18:5_28:7 M+NH4 …						Glycerolipids [GL]	Triradylglycerols [GL03]	Triacylglycerols [GL0301]	LMGL03011244 --- LMGL03012752 --- LMGL03015678 --- LMGL03016111	TG(13:0/22:6(4Z,7Z,10Z,13Z,16Z,19Z)/22:6(4Z,7Z,10Z,13Z,16Z,19Z))[iso3] --- TG(15:1(9Z)/20:5(5Z,8Z,11Z,14Z,17Z)/22:6(4Z,7Z,10Z,13Z,16Z,19Z))[iso6] --- TG(17:2(9Z,12Z)/18:4(6Z,9Z,12Z,15Z)/22:6(4Z,7Z,10Z,13Z,16Z,19Z))[iso6] --- TG(17:2(9Z,12Z)/20:5(5Z,8Z,11Z,14Z,17Z)/20:5(5Z,8Z,11Z,14Z,17Z))[iso3]	TG 57:12	TG 13:0_22:6_22:6 --- TG 15:1_20:5_22:6 --- TG 17:2_18:4_22:6 --- TG 17:2_20:5_20:5	AJIQZBRQXLMYRB-GFYSSKJJNA-N, BGHBPNWEYICEII-CLFAGFIQNA-N, BJWYPFASDAQJPB-NFANCVQSNA-N, BLWNQCTWTGMWKX-LFRSVOOXNA-N, BNVQKZRMYPDIIZ-NXRZPEOKNA-N, BPXPRUUUZAFSRT-QKBLDSFKNA-N, CYGQAVUSNGQUKF-DJYHPHJYNA-N, FLNDTXCADUNPRT-OZKSNGOJNA-N, GQMODZUQUYAVOV-FMWILRCLNA-N, IWFZTVDHBSJQEU-VQTQWEQBNA-N, JIYHQWBIEALILY-LIOWATDWNA-N, JXEBXFRKWKUKRM-PHGQZJAVNA-N, KYGPYAYYVHYFEU-INOCXALLNA-N, NFKUSJGQBOHFLL-ANZMNGL…	C60H92O6	1	M+NH4	926.724		10.38	10.37	70.4301	4.45083	100	100	-0.618038	8.67128e-08	3.94616e-07	-0.469893	0.00252615	0.0111163	-0.978501	0.000475089	0.00511243	-0.382232	0.0013464	0.00675534	-0.311198	6.06493e-07	2.91586e-06
SPB 20:1;O2 --- NAE 18:0	SPB	RP_PosMSMS_57		Y	nonGL	D-erythro-Sphingosine C-20 M+H NIST --- N,N-Dimethylsphingosine M+H NIST --- NAE 18:0 M+H Atlas --- SPB 20:1;2O M+H Atlas	Organic nitrogen compounds	Organonitrogen compounds	Amines	HMDB0013078, HMDB0013645	Stearoylethanolamide --- N,N-Dimethylsphingosine	Fatty Acyls [FA] --- Sphingolipids [SP]	Fatty amides [FA08] --- Sphingoid bases [SP01]	N-acyl ethanolamides (endocannabinoids) [FA0804] --- N-methylated sphingoid bases [SP0107]	LMFA08040051 --- LMSP01070001	N,N-dimethylsphingosine --- Stearoyl-EA	NAE 18:0 --- SPB 20:1;O2		HTJSZHKGNMXZJN-JDASADTNSA-N, HTJSZHKGNMXZJN-WUKNDPDINA-N, OTGQIQQTPXJQRG-UHFFFAOYSA-N, YRXOQXUDKDCXME-YIVRLKKSSA-N	C20H41NO2	1	M+H	328.32		3.79	3.78	61.5591	5.67132	99.1736	100	-0.589852	8.89292e-08	3.99531e-07	-0.638591	9.67583e-06	0.000140981	-1.03034	0.000102962	0.00164964	-0.365474	0.0013286	0.00673141	-0.335484	8.47734e-09	5.1049e-08
TAG 59:11	TAG	RP_PosMS1_1453		Y	GL	TG 10:0_13:1_36:10 M+NH4 Atlas --- TG 10:0_17:2_32:9 M+NH4 Atlas --- TG 11:0_16:2_32:9 M+NH4 Atlas --- TG 11:0_16:3_32:8 M+NH4 Atlas --- TG 11:0_16:4_32:7 M+NH4 Atlas --- TG 11:0_18:3_30:8 M+NH4 Atlas --- TG 11:0_18:4_30:7 M+NH4 Atlas --- TG 11:0_18:5_30:6 M+NH4 Atlas --- TG 11:0_20:4_28:7 M+NH4 Atlas --- TG 11:0_20:5_28:6 M+NH4 Atlas --- TG 11:0_22:4_26:7 M+NH4 Atlas --- TG 11:0_22:5_26:6 M+NH4 …	Lipids and lipid-like molecules	Glycerolipids	Triradylcglycerols	HMDB0043770	TG(15:0/22:5(7Z,10Z,13Z,16Z,19Z)/22:6(4Z,7Z,10Z,13Z,16Z,19Z))	Glycerolipids [GL]	Triradylglycerols [GL03]	Triacylglycerols [GL0301]	LMGL03011753 --- LMGL03011762 --- LMGL03012979 --- LMGL03013142 --- LMGL03015355 --- LMGL03016582	TG(15:0/22:5(7Z,10Z,13Z,16Z,19Z)/22:6(4Z,7Z,10Z,13Z,16Z,19Z))[iso6] --- TG(15:1(9Z)/22:5(7Z,10Z,13Z,16Z,19Z)/22:5(7Z,10Z,13Z,16Z,19Z))[iso3] --- TG(17:0/20:5(5Z,8Z,11Z,14Z,17Z)/22:6(4Z,7Z,10Z,13Z,16Z,19Z))[iso6] --- TG(17:1(9Z)/20:5(5Z,8Z,11Z,14Z,17Z)/22:5(7Z,10Z,13Z,16Z,19Z))[iso6] --- TG(18:4(6Z,9Z,12Z,15Z)/19:1(9Z)/22:6(4Z,7Z,10Z,13Z,16Z,19Z))[iso6] --- TG(19:1(9Z)/20:5(5Z,8Z,11Z,14Z,17Z)/20:5…	TG 59:11	TG 15:0_22:5_22:6 --- TG 15:1_22:5_22:5 --- TG 17:0_20:5_22:6 --- TG 17:1_20:5_22:5 --- TG 18:4_19:1_22:6 --- TG 19:1_20:5_20:5	AARLKRBVHQJMIF-JDSVWTSQNA-N, AELOKTICLXYFNQ-NCEKVRKXNA-N, ALCDZVLFHOQCHN-RCMQXCEKNA-N, ATLNDDJPRRETRP-WFBACOOVNA-N, ATMNOZKNFRYENV-RTZAWDRXNA-N, AUKOAPIRLREGLL-ZYJYYFTLNA-N, BBNASZJBIBSCCH-VMJXORQONA-N, BRHGQKSOHZTEJG-VNTBBQKDNA-N, BSZPSRVMMAHKDP-XFNXXFNNNA-N, CBLXJBBTTNMEFF-ZTRPFPSONA-N, CERREUSYVFBJEA-FGOGNYNFNA-N, CKYNTHVFPCMQGF-KVBUZQTPNA-N, CMOVYKMUSOPXJW-GVQGDUEQNA-N, CTAPFUIALXWLAL-HZVAWZP…	C62H98O6	1	M+NH4	956.769		10.94	10.92	75.8065	26.7435	99.1736	100	-0.612956	8.91331e-08	3.99531e-07	-0.454458	0.00329395	0.0137564	-0.880415	0.00164765	0.0106066	-0.378304	0.00139252	0.00685365	-0.301818	1.18643e-06	5.48298e-06
TAG 41:0	TAG	RP_PosMSMS_788		Y	GL	TG 10:0_15:0_16:0 M+NH4 Atlas --- TG 11:0_14:0_16:0 M+NH4 Atlas --- TG 9:0_16:0_16:0 M+NH4 Atlas	Lipids and lipid-like molecules	Glycerolipids	Triradylcglycerols	HMDB0072597, HMDB0104019	TG(10:0/15:0/16:0) --- TG(16:0/15:0/10:0)								AISYWISOANTPSC-UHFFFAOYNA-N, MDBWPCXCFWWYAL-UHFFFAOYNA-N, SFFOFMGDGQZGOW-UHFFFAOYNA-N	C44H84O6	1	M+NH4	726.656		9.69	9.67	38.172	14.4973	92.562	100	0.60152	1.00103e-07	4.45354e-07	0.450256	0.00309515	0.0130929	0.810142	0.00338438	0.0176818	0.226353	0.056582	0.0919522	0.294072	1.58858e-06	7.1746e-06
DAG 40:6	DAG	RP_PosMSMS_685		Y	GL	1-Stearoyl-2-docosahexaenoyl-sn-glycerol M+Na NIST	Lipids and lipid-like molecules	Glycerolipids	Diradylglycerols	HMDB0007179	DG(18:0/22:6(4Z,7Z,10Z,13Z,16Z,19Z)/0:0)	Glycerolipids [GL]	Diradylglycerols [GL02]	Diacylglycerols [GL0201]	LMGL02010216	DG(18:0/22:6(4Z,7Z,10Z,13Z,16Z,19Z)/0:0)[iso2]	DG 40:6	DG 18:0_22:6	LBDXVTOFXXDOGH-KXYFHQNYSA-N	C43H72O5	1	M+Na	691.523		7.58	7.54	36.5591	6.75131	100	100	0.607815	1.15405e-07	5.09626e-07	0.522845	0.000642368	0.00356934	0.523755	0.0657774	0.153478	0.232199	0.0538576	0.0889229	0.293363	2.50427e-06	1.10588e-05
TAG 54:6	TAG	RP_PosMSMS_1327, 1336		Y	GL	TG 16:0_18:2_20:4 M+NH4 Atlas --- TG 18:1_18:2_18:3 M+NH4 Atlas --- TG 18:2_18:2_18:2 M+NH4 Atlas, TG 16:0_18:2_20:4 M+Na Atlas --- TG 18:2_18:2_18:2 M+Na Atlas	Lipids and lipid-like molecules	Glycerolipids	Triradylcglycerols	HMDB0005474	TG(18:2(9Z,12Z)/18:2(9Z,12Z)/18:2(9Z,12Z))	Glycerolipids [GL]	Triradylglycerols [GL03]	Triacylglycerols [GL0301]	LMGL03010371	TG(18:2(9Z,12Z)/18:2(9Z,12Z)/18:2(9Z,12Z))	TG 54:6	TG 18:2_18:2_18:2	HBOQXIRUPVQLKX-BBWANDEASA-N, NPELAMJIYLFQEL-ISZDOGAUNA-N, OTUIORVXGJUHBH-QSVDUOTDNA-N, HBOQXIRUPVQLKX-BBWANDEASA-N, NPELAMJIYLFQEL-ISZDOGAUNA-N	C57H98O6	1	M+NH4, M+Na	896.7637, 901.7198		10.425	10.425	96.7742	1.86624	98.3471	100	0.604556	1.24976e-07	5.47838e-07	0.390422	0.0117839	0.0367921	0.527108	0.0632107	0.148838	0.145132	0.229781	0.210852	0.269384	1.77265e-05	7.14041e-05
PC 40:8	PC	RP_Pos, RP_NegMSMS_1120, 1185, 709		Y	nonGL	1,2-Diarachidonoyl-sn-glycero-3-phosphocholine M+H NIST, PC 40:8 M+Na Atlas, PC 18:2_22:6 M+HCOO Atlas --- PC 20:4_20:4 M+HCOO Atlas	Lipids and lipid-like molecules	Glycerophospholipids	Glycerophosphocholines	HMDB0008443, HMDB0008477, HMDB0008156	PC(18:2(9Z,12Z)/22:6(4Z,7Z,10Z,13Z,16Z,19Z)) --- PC(20:4(5Z,8Z,11Z,14Z)/20:4(5Z,8Z,11Z,14Z)) --- PC(20:4(8Z,11Z,14Z,17Z)/20:4(8Z,11Z,14Z,17Z))	Glycerophospholipids [GP]	Glycerophosphocholines [GP01]	Diacylglycerophosphocholines [GP0101]	LMGP01011052, LMGP01010947	PC(20:4(5Z,8Z,11Z,14Z)/20:4(5Z,8Z,11Z,14Z)), PC(18:2(9Z,12Z)/22:6(4Z,7Z,10Z,13Z,16Z,19Z))	PC 40:8	PC 20:4/20:4, PC 18:2_22:6	LZLVZIFMYXDKCN-QJWFYWCHSA-N, BFCSBEFTXQRIOJ-QIURYZFVNA-N, YFPZDRPTUVXQJW-CLUYAFRTNA-N, BFCSBEFTXQRIOJ-QIURYZFVNA-N, FCTKCFNDGVBOBD-ZPBIJWSINA-N	C48H80NO8P	1, 2	M+H, M+Na, M+HCOO	830.5642, 852.5478, 874.5596	669.4783, 814.544	5.36	5.32	66.129	8.77328	100	100	-0.596906	1.49938e-07	6.52462e-07	-0.495955	0.00110581	0.00553473	-0.901285	0.0010922	0.00818548	-0.465324	5.23358e-05	0.000620032	-0.305618	5.93624e-07	2.8772e-06
TAG 55:7	TAG	RP_PosMSMS_1352		Y	GL	TG 10:0_11:0_34:7 M+NH4 Atlas --- TG 10:0_13:0_32:7 M+NH4 Atlas --- TG 10:0_13:1_32:6 M+NH4 Atlas --- TG 10:0_15:0_30:7 M+NH4 Atlas --- TG 10:0_15:1_30:6 M+NH4 Atlas --- TG 10:0_17:0_28:7 M+NH4 Atlas --- TG 10:0_17:1_28:6 M+NH4 Atlas --- TG 10:0_17:2_28:5 M+NH4 Atlas --- TG 10:0_19:0_26:7 M+NH4 Atlas --- TG 10:0_19:1_26:6 M+NH4 Atlas --- TG 10:0_19:2_26:5 M+NH4 Atlas --- TG 10:0_21:1_24:6 M+NH4 A…	Lipids and lipid-like molecules	Glycerolipids	Triradylcglycerols	HMDB0043277, HMDB0043421, HMDB0043478	TG(15:0/18:1(9Z)/22:6(4Z,7Z,10Z,13Z,16Z,19Z)) --- TG(15:0/18:2(9Z,12Z)/22:5(7Z,10Z,13Z,16Z,19Z)) --- TG(15:0/20:2n6/20:5(5Z,8Z,11Z,14Z,17Z))	Glycerolipids [GL]	Triradylglycerols [GL03]	Triacylglycerols [GL0301]	LMGL03010543 --- LMGL03010560 --- LMGL03010561 --- LMGL03010562 --- LMGL03010711 --- LMGL03010712 --- LMGL03010714 --- LMGL03010715 --- LMGL03013082 --- LMGL03014070 --- LMGL03014080 --- LMGL03014104 --- LMGL03014480 --- LMGL03014872 --- LMGL03014885 --- LMGL03015165 --- LMGL03015183 --- LMGL03015232 --- LMGL03015292 --- LMGL03015496 --- LMGL03015515 --- LMGL03015567 --- LMGL03015582 --- LMGL0301…	TG(13:0/20:1(11Z)/22:6(4Z,7Z,10Z,13Z,16Z,19Z))[iso6] --- TG(13:0/20:2(11Z,14Z)/22:5(7Z,10Z,13Z,16Z,19Z))[iso6] --- TG(13:0/20:5(5Z,8Z,11Z,14Z,17Z)/22:2(13Z,16Z))[iso6] --- TG(14:0/19:1(9Z)/22:6(4Z,7Z,10Z,13Z,16Z,19Z))[iso6] --- TG(14:1(9Z)/19:0/22:6(4Z,7Z,10Z,13Z,16Z,19Z))[iso6] --- TG(14:1(9Z)/19:1(9Z)/22:5(7Z,10Z,13Z,16Z,19Z))[iso6] --- TG(15:0/18:1(9Z)/22:6(4Z,7Z,10Z,13Z,16Z,19Z))[iso6] --- TG…	TG 55:7	TG 13:0_20:1_22:6 --- TG 13:0_20:2_22:5 --- TG 13:0_20:5_22:2 --- TG 14:0_19:1_22:6 --- TG 14:1_19:0_22:6 --- TG 14:1_19:1_22:5 --- TG 15:0_18:1_22:6 --- TG 15:0_18:2_22:5 --- TG 15:0_18:4_22:3 --- TG 15:0_20:2_20:5 --- TG 15:1_18:0_22:6 --- TG 15:1_18:1_22:5 --- TG 15:1_18:3_22:3 --- TG 15:1_18:4_22:2 --- TG 15:1_20:1_20:5 --- TG 16:0_17:1_22:6 --- TG 16:0_17:2_22:5 --- TG 16:1_17:0_22:6 --- TG …	AALNHBCFJBISAW-RSILMUHANA-N, ACJTYPJFINZIBK-SCZPNVMENA-N, AGBVOSQKMBEOMR-GJCOZSHDNA-N, AHKBIFOIBCTDDE-IURQDWFINA-N, AJPMDOWSMZIGDB-PRBLUXKINA-N, AKDXFTUXZSCYDR-ZRZQNYRSNA-N, AKHZMTZZSCCJJY-UYPFJPMFNA-N, ALULOWZNTGURIV-JBWDVDSONA-N, AMDSVOUOPNTSLO-GTTJEWSBNA-N, ASHYPKAQBLSNHV-KBPATUDGNA-N, AUCAJUCNMSTNMJ-KQDKGLBONA-N, AYWJZJJUFAYUTL-IYNPXTIGNA-N, BAQSBBCFJUNIHC-DGBUTCIRNA-N, BGPCOCYUZRYBLB-BLXBUHL…	C58H98O6	1	M+NH4	908.769		11.14	11.15	100	5.26601	100	100	0.585786	1.55679e-07	6.72535e-07	0.566784	0.000124015	0.000991621	0.65738	0.0168096	0.0599976	0.293295	0.0116201	0.0309542	0.301881	5.04744e-07	2.46646e-06
SPB 18:1;O2 --- NAE 16:0	SPB	RP_PosMSMS_1		Y	nonGL	D-erythro-C18-Sphingosine M+H NIST --- Palmitoyl ethanolamide M+H NIST	Organic nitrogen compounds --- Organic acids and derivatives	Organonitrogen compounds --- Carboximidic acids and derivatives	Amines --- Carboximidic acids	HMDB0000252, HMDB0002100	Sphingosine --- Palmitoylethanolamide	Fatty Acyls [FA] --- Sphingolipids [SP]	Fatty amides [FA08] --- Sphingoid bases [SP01]	N-acyl ethanolamides (endocannabinoids) [FA0804] --- Sphing-4-enines (Sphingosines) [SP0101]	LMFA08040013 --- LMSP01010001	Palmitoyl-EA --- Sphingosine	NAE 16:0 --- SPB 18:1;O2		HXYVTAGFYLMHSO-UHFFFAOYSA-N, WWUZIQQURGPMPG-KRWOKUGFSA-N	C18H37NO2	1	M+H	300.289		3.29	3.3	65.8602	4.93165	100	100	-0.589228	1.61969e-07	6.94673e-07	-0.447491	0.003085	0.0130929	-0.865897	0.00154959	0.0102347	-0.251249	0.0327127	0.0621525	-0.293039	1.46404e-06	6.71384e-06
22:0-Glc-Stigmasterol --- 22:1-Glc-Sitosterol	ST - Sterols	RP_PosMS1_1370		Y	nonGL	DGTS 21:0_26:4 M+H Atlas --- DGTS 21:2_26:2 M+H Atlas --- DGTS 23:0_24:4 M+H Atlas --- DGTS 25:0_22:4 M+H Atlas --- DGTS 27:0_20:4 M+H Atlas --- ST 27:1;O;Hex;FA 24:1 M+NH4 Atlas --- ST 28:2;O;Hex;FA 23:0 M+NH4 Atlas --- ST 29:1;O;Hex;FA 22:1 M+NH4 Atlas --- ST 29:2;O;Hex;FA 22:0 M+NH4 Atlas						Sterols [ST]	Sterols [ST01]	Stigmasterols and C24-ethyl derivatives [ST0104]	LMST01040213 --- LMST01040223	22:0-Glc-Stigmasterol --- 22:1-Glc-Sitosterol			DXMPKCSAAVNDTF-MSUUIHNZNA-N, HSLGELQULTXARA-XHFJISOBNA-N, JEZPHDPYUQKBJL-UHFFFAOYNA-N, NLDJDDXLBKWWMS-MSUUIHNZNA-N, QIVLPQLRFOZNPL-LGUFLKDENA-N, RBKQXSGKLMGOOJ-FRXQITOYNA-N, SWDQONNAXWZGQS-OALTZLDVNA-N, UNNVQNJMZWWACP-QNGVAJRBNA-N, ZLMDMYKUGKMBBT-UHFFFAOYNA-N	C57H100O7	1	M+H --- M+NH4	914.779		10.3	10.28	56.7204	15.4184	85.124	96.9388	0.595353	2.06963e-07	8.81306e-07	0.42676	0.00571628	0.0212954	0.68225	0.0154568	0.0565691	0.412948	0.000422894	0.00295332	0.281382	6.56422e-06	2.77541e-05
TAG 58:5	TAG	RP_PosMSMS_1452, 1460		Y	GL	TG 18:0_18:1_22:4 M+NH4 Atlas, TG 18:0_18:0_22:5 M+Na Atlas --- TG 18:2_18:2_22:1 M+Na Atlas	Lipids and lipid-like molecules	Glycerolipids	Triradylcglycerols	HMDB0044773, HMDB0051665	TG(18:0/18:0/22:5(7Z,10Z,13Z,16Z,19Z)) --- TG(22:1(13Z)/18:2(9Z,12Z)/18:2(9Z,12Z))	Glycerolipids [GL]	Triradylglycerols [GL03]	Triacylglycerols [GL0301]	LMGL03011124 --- LMGL03011150	TG(18:0/18:0/22:5(7Z,10Z,13Z,16Z,19Z))[iso3] --- TG(18:2(9Z,12Z)/18:2(9Z,12Z)/22:1(13Z))[iso3]	TG 58:5	TG 18:0_18:0_22:5 --- TG 18:2_18:2_22:1	XXQLXVNLMLDWDQ-XNRINBKZNA-N, BMAGIXXDTYUYPM-ROCGWMDANA-N, SRYYVIJJOHXIGQ-KNNVLUOCNA-N	C61H108O6	2, 1	M+NH4, M+Na	954.841, 959.7972	681.58	11.355	11.29	55.1075	7.17792	76.8595	100	0.57427	4.76046e-07	2.01276e-06	0.381802	0.0129083	0.0401117	0.590535	0.0350434	0.0990815	0.335992	0.00420862	0.0156472	0.262588	2.46781e-05	9.5533e-05
2-Hydroxycinnamic acid --- 4-Hydroxycinnamic acid	Cinnamic acids and derivatives	HILIC_NegMSMS_170	RT_1		nonGL	4-Hydroxycinnamic acid M-H HMDB --- L-Tyrosine M-H-NH3 NIST --- trans-2-Hydroxycinnamic acid M-H NIST	Phenylpropanoids and polyketides	Cinnamic acids and derivatives	Hydroxycinnamic acids and derivatives	HMDB0002035, HMDB0002641	4-Hydroxycinnamic acid --- 2-Hydroxycinnamic acid								NGSWKAQJJWESNS-ZZXKWVIFSA-N, OUYCCCASQSFEME-UHFFFAOYSA-N, PMOWTIHVNWZYFI-AATRIKPKSA-N	C9H11NO3, C9H8O3	1	M-H --- M-H-NH3	163.04		5.28	5.34	64.7696	10.5646	100	100	-0.579903	6.47957e-07	2.72032e-06	-0.376285	0.0164425	0.0481288	-0.573072	0.0452249	0.116452	-0.303171	0.011796	0.0312616	-0.262302	3.78155e-05	0.000144513
Val-Pro	Amino acids, peptides, and analogues	HILIC_PosMS1_548	RT_1		nonGL	Val-Pro M+H NIST	Organic acids and derivatives	Carboxylic acids and derivatives	Amino acids, peptides, and analogues	HMDB0029135	Valylproline								GIAZPLMMQOERPN-UHFFFAOYSA-N	C10H18N2O3	1	M+H	215.139		1.87	1.86	75.4054	12.7354	100	100	-0.584553	8.2806e-07	3.45214e-06	-0.455582	0.00400357	0.0159093	-0.607762	0.0364803	0.101551	-0.349702	0.00406481	0.0153331	-0.279385	1.42554e-05	5.82089e-05
Alanine	Amino acids, peptides, and analogues	HILIC_NegMS1_7	RT_2		nonGL	Alanine M-H FiehnHILIC --- D-Alanine M-H HMDB --- L-Alanine M-H HMDB --- Sarcosine M-H FiehnHILIC --- Sarcosine M-H HMDB --- beta-Alanine M-H HMDB	Organic acids and derivatives	Carboxylic acids and derivatives	Amino acids, peptides, and analogues	HMDB0000056, HMDB0000161, HMDB0001310	beta-Alanine --- L-Alanine --- D-Alanine								FSYKKLYZXJSNPZ-UHFFFAOYSA-N, QNAYBMKLOCPYGJ-REOHCLBHSA-N, QNAYBMKLOCPYGJ-UHFFFAOYNA-N, QNAYBMKLOCPYGJ-UWTATZPHSA-N, UCMIRNVEIXFBKS-UHFFFAOYSA-N	C3H7NO2	1	M-H	88.0405		13.5	13.54	84.0108	17.3343	75.4237	100	0.564529	1.07911e-06	4.4675e-06	0.341635	0.0283425	0.0734519	0.868466	0.00185414	0.0114257	0.349775	0.00315576	0.0127411	0.267548	2.08648e-05	8.23759e-05
TAG 60:10	TAG	RP_PosMSMS_1484, 1495		Y	GL	TG 18:0_20:4_22:6 M+NH4 Atlas --- TG 18:1_20:4_22:5 M+NH4 Atlas, TG 16:0_22:5_22:5 M+Na Atlas --- TG 18:0_20:4_22:6 M+Na Atlas --- TG 20:2_20:4_20:4 M+Na Atlas	Lipids and lipid-like molecules	Glycerolipids	Triradylcglycerols	HMDB0045368, HMDB0050218, HMDB0044610, HMDB0053597	TG(16:0/22:5(7Z,10Z,13Z,16Z,19Z)/22:5(7Z,10Z,13Z,16Z,19Z)) --- TG(18:0/20:4(8Z,11Z,14Z,17Z)/22:6(4Z,7Z,10Z,13Z,16Z,19Z)) --- TG(18:1(9Z)/20:4(8Z,11Z,14Z,17Z)/22:5(7Z,10Z,13Z,16Z,19Z)) --- TG(20:2n6/20:4(8Z,11Z,14Z,17Z)/20:4(8Z,11Z,14Z,17Z))	Glycerolipids [GL]	Triradylglycerols [GL03]	Triacylglycerols [GL0301]	LMGL03012015	TG(16:0/22:5(7Z,10Z,13Z,16Z,19Z)/22:5(7Z,10Z,13Z,16Z,19Z))[iso3]	TG 60:10	TG 16:0_22:5_22:5	RXVLBDOYHGQIHF-FPCWJJTJNA-N, XOYSWGHQVMLVFO-YAAKUZBFNA-N, DKSGCJPLSFCQNA-ZGEQXYCDNA-N, RXVLBDOYHGQIHF-FPCWJJTJNA-N, XMRBIWWWAIEADV-YYQFQRANNA-N	C63H102O6	1	M+NH4, M+Na	972.7949, 977.75		10.65	10.6	69.3548	6.72144	85.9504	100	-0.563787	1.463e-06	6.01506e-06	-0.441132	0.0046606	0.0181894	-1.05613	0.000145104	0.00201188	-0.247109	0.0414114	0.0740515	-0.294773	2.67507e-06	1.16407e-05
DAG 38:5	DAG	RP_PosMSMS_608		Y	GL	Cer 19:3;3O/22:2;(2OH) M+H Atlas --- Cer 21:3;3O/20:2;(2OH) M+H Atlas --- Cer 23:3;3O/18:2;(2OH) M+H Atlas --- Cer 25:3;3O/16:2;(2OH) M+H Atlas --- DG 10:0_28:5 M+NH4 Atlas --- DG 12:0_26:5 M+NH4 Atlas --- DG 14:0_24:5 M+NH4 Atlas --- DG 14:1_24:4 M+NH4 Atlas --- DG 16:0_22:5 M+NH4 Atlas --- DG 16:1_22:4 M+NH4 Atlas --- DG 16:2_22:3 M+NH4 Atlas --- DG 18:0_20:5 M+NH4 Atlas --- DG 18:1_20:4 M+NH4 …	Lipids and lipid-like molecules	Glycerolipids	Diradylglycerols	HMDB0007120, HMDB0007172, HMDB0007229, HMDB0007396, HMDB0007424	DG(16:0/22:5(7Z,10Z,13Z,16Z,19Z)/0:0) --- DG(18:0/20:5(5Z,8Z,11Z,14Z,17Z)/0:0) --- DG(18:1(9Z)/20:4(8Z,11Z,14Z,17Z)/0:0) --- DG(20:1(11Z)/18:4(6Z,9Z,12Z,15Z)/0:0) --- DG(20:2(11Z,14Z)/18:3(9Z,12Z,15Z)/0:0)	Glycerolipids [GL]	Diradylglycerols [GL02]	Diacylglycerols [GL0201]	LMGL02010122 --- LMGL02010150	DG(16:0/22:5(7Z,10Z,13Z,16Z,19Z)/0:0)[iso2] --- DG(18:0/20:5(5Z,8Z,11Z,14Z,17Z)/0:0)[iso2]	DG 38:5	DG 16:0_22:5 --- DG 18:0_20:5	AJVICDHCQZBZMM-VYARSWGKNA-N, AOLSGZQTHJEDCU-GJCLIZKUNA-N, APADBBPHEBAYDR-UHFFFAOYNA-N, BFTRDKMVYCWZJQ-QXMHVHEDNA-N, BMUGHRFHPAIWJQ-XDNZRWFZNA-N, BRVPDMGQWTUWHG-SWWMJBKRNA-N, BVNOYERWUZNRKD-XFFFEZQMNA-N, BWBIUDHQOIQHSO-WUZLTRMFNA-N, CDIDDLXSXXDECX-HAGCXRLMNA-N, DLLGDCTZGSZLQG-YOJOTYGRNA-N, DYJAOUONXLPPDD-OTDIMJFWNA-N, FLKYYISDTBTDLP-UHFFFAOYNA-N, GBSAELJSWLWUBU-UHFFFAOYNA-N, GRIYZLPCRMCEIJ-LEIQGVM…	C41H70O5	1	M+H --- M+NH4	660.552		7.23	7.13	41.6667	15.631	76.0331	100	0.563973	1.56574e-06	6.39335e-06	0.397267	0.0114183	0.0359936	0.780804	0.00600431	0.0277501	0.276747	0.022344	0.0481129	0.272481	1.83927e-05	7.35905e-05
SM 41:2;O2	SM	RP_Pos, RP_NegMSMS_1021, 654, 1091		Y	nonGL	SM 37:2;2O/4:0 M+H Atlas, SM 37:2;2O/4:0 M+HCOO Atlas, SM 41:2;2O M+Na Atlas													PYHVSHVNGHAESR-GALQSLKWNA-N, GJTYXLQMCXCQCW-GJLVVWLQNA-N	C46H91N2O6P	2, 1	M+H, M+HCOO, M+Na	799.6636, 843.6594, 821.6461	184.072	7.29	7.29	62.2642	11.0938	85	100	-0.553757	1.65192e-06	6.69936e-06	-0.536166	0.000415814	0.00257205	-0.610616	0.0302742	0.0880131	-0.260888	0.0287949	0.0570146	-0.284865	4.52638e-06	1.92746e-05
TAG 55:5	TAG	RP_PosMSMS_1365		Y	GL	TG 17:0_18:1_20:4 M+NH4 Atlas													INUZPYWKYINTOT-SSEISKJWNA-N	C58H102O6	1	M+NH4	912.795		10.97	10.94	24.7312	22.397	28.0992	100	0.555102	1.67268e-06	6.73772e-06	0.321471	0.0391959	0.0911335	0.566639	0.0454204	0.116539	0.139097	0.249758	0.222538	0.245255	0.000108156	0.000377066
TAG 57:10	TAG	RP_PosMS1_1408		Y	GL	DGGA 17:0_27:0 M+NH4 Atlas --- DGGA 18:0_26:0 M+NH4 Atlas --- DGGA 19:0_25:0 M+NH4 Atlas --- DGGA 20:0_24:0 M+NH4 Atlas --- DGGA 21:0_23:0 M+NH4 Atlas --- DGGA 22:0_22:0 M+NH4 Atlas --- TG 10:0_11:0_36:10 M+NH4 Atlas --- TG 10:0_13:1_34:9 M+NH4 Atlas --- TG 10:0_15:1_32:9 M+NH4 Atlas --- TG 10:0_17:2_30:8 M+NH4 Atlas --- TG 11:0_14:1_32:9 M+NH4 Atlas --- TG 11:0_16:2_30:8 M+NH4 Atlas --- TG 11:0_…	Lipids and lipid-like molecules	Glycerolipids	Triradylcglycerols	HMDB0043712, HMDB0043740	TG(15:0/20:4(8Z,11Z,14Z,17Z)/22:6(4Z,7Z,10Z,13Z,16Z,19Z)) --- TG(15:0/20:5(5Z,8Z,11Z,14Z,17Z)/22:5(7Z,10Z,13Z,16Z,19Z))	Glycerolipids [GL]	Triradylglycerols [GL03]	Triacylglycerols [GL0301]	LMGL03011093 --- LMGL03011303 --- LMGL03011309 --- LMGL03011310 --- LMGL03012751 --- LMGL03015326 --- LMGL03015949 --- LMGL03016031 --- LMGL03016574	TG(13:0/22:5(7Z,10Z,13Z,16Z,19Z)/22:5(7Z,10Z,13Z,16Z,19Z))[iso3] --- TG(15:0/20:5(5Z,8Z,11Z,14Z,17Z)/22:5(7Z,10Z,13Z,16Z,19Z))[iso6] --- TG(17:0/18:4(6Z,9Z,12Z,15Z)/22:6(4Z,7Z,10Z,13Z,16Z,19Z))[iso6] --- TG(17:0/20:5(5Z,8Z,11Z,14Z,17Z)/20:5(5Z,8Z,11Z,14Z,17Z))[iso3] --- TG(17:1(9Z)/18:3(9Z,12Z,15Z)/22:6(4Z,7Z,10Z,13Z,16Z,19Z))[iso6] --- TG(17:1(9Z)/18:4(6Z,9Z,12Z,15Z)/22:5(7Z,10Z,13Z,16Z,19Z))[is…	TG 57:10	TG 13:0_22:5_22:5 --- TG 15:0_20:5_22:5 --- TG 17:0_18:4_22:6 --- TG 17:0_20:5_20:5 --- TG 17:1_18:3_22:6 --- TG 17:1_18:4_22:5 --- TG 17:2_18:2_22:6 --- TG 17:2_18:3_22:5 --- TG 18:4_19:1_20:5	AASYHQUIIWQAME-NPLOLFCONA-N, ALZNPNOGKFUSNJ-GPSIMCJLNA-N, ANSKLVDHBRJQPP-NXTNBXLWNA-N, AOJRSUBSKBEIEZ-LTFNYHSZNA-N, AOUFRGGRUYVGKH-COWWSZQRNA-N, ASBDUKULYPPCGE-AHIYUYSHNA-N, ASPQSVUSLUCKAX-GPYZMMRYNA-N, AYUCGYXYJUDZGW-BFWJQUJUNA-N, BHTNWPNYUDLNBU-JZWYWRAPNA-N, BPMUBNDIWDUJLB-XYAOSZBNNA-N, BVYKHTAJCGASSD-IFZDTKGONA-N, BZQNWKBWHNGKJA-RGXKRFOYNA-N, CAVGZHNCGXHLGL-JRFCRFNJNA-N, CDHSCZXLLGFEGO-BRDHJHF…	C60H96O6	1	M+NH4	930.754		10.81	10.79	99.1935	7.11816	100	100	-0.550159	2.1187e-06	8.47708e-06	-0.426884	0.00568825	0.0212954	-0.756877	0.00697916	0.031061	-0.390907	0.000883157	0.00530702	-0.272453	1.37005e-05	5.63287e-05
TAG 47:5	TAG	RP_PosMS1_1038		Y	GL	TG 10:0_11:0_26:5 M+Na Atlas --- TG 10:0_13:0_24:5 M+Na Atlas --- TG 10:0_13:1_24:4 M+Na Atlas --- TG 10:0_15:0_22:5 M+Na Atlas --- TG 10:0_15:1_22:4 M+Na Atlas --- TG 10:0_16:3_21:2 M+Na Atlas --- TG 10:0_16:4_21:1 M+Na Atlas --- TG 10:0_17:0_20:5 M+Na Atlas --- TG 10:0_17:1_20:4 M+Na Atlas --- TG 10:0_17:2_20:3 M+Na Atlas --- TG 10:0_18:3_19:2 M+Na Atlas --- TG 10:0_18:4_19:1 M+Na Atlas --- TG …	Lipids and lipid-like molecules	Glycerolipids	Triradylcglycerols	HMDB0047764	TG(14:1(9Z)/15:0/18:4(6Z,9Z,12Z,15Z))	Glycerolipids [GL]	Triradylglycerols [GL03]	Triacylglycerols [GL0301]	LMGL03013206 --- LMGL03013286 --- LMGL03013402 --- LMGL03013423 --- LMGL03013693 --- LMGL03013820 --- LMGL03014204 --- LMGL03014583 --- LMGL03014609	TG(12:0/13:0/22:5(7Z,10Z,13Z,16Z,19Z))[iso6] --- TG(12:0/15:0/20:5(5Z,8Z,11Z,14Z,17Z))[iso6] --- TG(12:0/17:1(9Z)/18:4(6Z,9Z,12Z,15Z))[iso6] --- TG(12:0/17:2(9Z,12Z)/18:3(9Z,12Z,15Z))[iso6] --- TG(13:0/14:0/20:5(5Z,8Z,11Z,14Z,17Z))[iso6] --- TG(13:0/16:1(9Z)/18:4(6Z,9Z,12Z,15Z))[iso6] --- TG(14:0/15:1(9Z)/18:4(6Z,9Z,12Z,15Z))[iso6] --- TG(14:1(9Z)/15:0/18:4(6Z,9Z,12Z,15Z))[iso6] --- TG(14:1(9Z)/1…	TG 47:5	TG 12:0_13:0_22:5 --- TG 12:0_15:0_20:5 --- TG 12:0_17:1_18:4 --- TG 12:0_17:2_18:3 --- TG 13:0_14:0_20:5 --- TG 13:0_16:1_18:4 --- TG 14:0_15:1_18:4 --- TG 14:1_15:0_18:4 --- TG 14:1_15:1_18:3	AFNOIMUFAHOYAA-QILKFRGSNA-N, AHZXEKPOBYVATK-XIIOUZSANA-N, AQVPZJOVRUUKGR-MVSVTYTGNA-N, ATENQTLUTBGXGO-KKRJSTFMNA-N, BDNGJCPOIWOWDS-DEXDFQHLNA-N, BQFACYKGKSMYHB-IKCOYSNNNA-N, CKDYHACLBCGCQP-KBRCUZJUNA-N, CXLWEDBQJPQFMF-PWSKTLNONA-N, CYIZDKWMTPVKLC-YAQPKWDVNA-N, DFKDCLNAZFDOHM-DKEMIWFZNA-N, DHDNRFGDWHUYOG-RXCCYYBTNA-N, DSVIMRJATCSAQG-XUEQOWQENA-N, FBNRTBKWRHQZEG-JEFOLWGBNA-N, FKPUBQMQRBEXAZ-XCAWXRC…	C50H86O6	1	M+Na	805.626		9.52	9.44	33.6022	11.9003	97.5207	100	0.546738	2.48105e-06	9.86068e-06	0.541691	0.00037127	0.00234068	0.460906	0.10484	0.205546	0.213092	0.0761988	0.110614	0.27586	1.02971e-05	4.26299e-05
TAG 40:2	TAG	RP_PosMS1_742		Y	GL	TG 10:0_10:0_20:2 M+Na Atlas --- TG 10:0_11:0_19:2 M+Na Atlas --- TG 10:0_12:0_18:2 M+Na Atlas --- TG 10:0_13:0_17:2 M+Na Atlas --- TG 10:0_13:1_17:1 M+Na Atlas --- TG 10:0_14:0_16:2 M+Na Atlas --- TG 10:0_14:1_16:1 M+Na Atlas --- TG 10:0_15:1_15:1 M+Na Atlas --- TG 11:0_11:0_18:2 M+Na Atlas --- TG 11:0_12:0_17:2 M+Na Atlas --- TG 11:0_13:0_16:2 M+Na Atlas --- TG 11:0_13:1_16:1 M+Na Atlas --- TG …						Glycerolipids [GL]	Triradylglycerols [GL03]	Triacylglycerols [GL0301]	LMGL03012661	TG(12:0/14:1(9Z)/14:1(9Z))[iso3]	TG 40:2	TG 12:0_14:1_14:1	AHYUTWJPPMYMPO-RRFGMPLONA-N, APDIWXREQVGAIJ-HCWXFRTBNA-N, BAAASXMKEHZORV-GJLVVWLQNA-N, BBYPMVRKJMJUDU-CLFAGFIQNA-N, BYKLPJKAYIKHQU-LTXDKZCQNA-N, CEAIGCQBALVBHB-AJUAVLHQNA-N, CIRZFXVDQOACKA-HMTRZLGANA-N, CRMAOYAMECGFKG-SPNKYUGCNA-N, CTNKKFVFNBQALU-CLFAGFIQNA-N, DAQRCUIWLPJWRF-KSWDIIKGNA-N, FJHRZGCONQAXMQ-VYEFPUSRNA-N, FPFUIASCMNVOKN-BNXAACBSNA-N, GSEABBFQDZDDRF-RYKNKZFFNA-N, GXRODSBSDBCXSO-YJMJMZF…	C43H78O6	1	M+Na	713.568		9.02	8.73	55.1075	6.46706	95.8678	100	0.547462	3.81723e-06	1.50707e-05	0.465469	0.00295883	0.0126799	0.715108	0.0125358	0.0493886	0.312799	0.00982424	0.0282058	0.276226	1.49664e-05	6.06965e-05
S-Adenosylhomocysteine	Organoheterocyclic compounds	HILIC_NegMSMS_823			nonGL	S-Adenosyl-L-homocysteine; LC-ESI-QTOF; MS2; CE M-H MassBank --- S-Adenosyl-homocysteine M-H FiehnHILIC	Organoheterocyclic compounds	Lactones	Gamma butyrolactones	HMDB0000939	S-Adenosylhomocysteine								ZJUKTBDSGOFHSH-UHFFFAOYNA-N, ZJUKTBDSGOFHSH-WFMPWKQPSA-N	C14H20N6O5S	1	M-H	383.115		13.95	13.91	6.23306	14.5191	19.4915	97.9592	0.509083	7.43381e-06	2.91562e-05	0.281252	0.0642233	0.127219	0.563052	0.0408399	0.109081	0.288808	0.0127261	0.0326209	0.224852	0.000282079	0.000894491
TAG 38:0	TAG	RP_PosMSMS_669		Y	GL	TG 12:0_12:0_14:0 M+NH4 Atlas	Lipids and lipid-like molecules	Glycerolipids	Triradylcglycerols	HMDB0031124, HMDB0094966, HMDB0099305	Glycerol 1,2-didodecanoate 3-tetradecanoate --- TG(12:0/12:0/14:0) --- TG(14:0/12:0/12:0)	Glycerolipids [GL]	Triradylglycerols [GL03]	Triacylglycerols [GL0301]	LMGL03012628	TG(12:0/12:0/14:0)[iso3]	TG 38:0	TG 12:0_12:0_14:0	SMUUMIRCIBXLGI-UHFFFAOYNA-N	C41H78O6	1	M+NH4	684.609		9.02	8.99	59.4086	11.5329	80.9917	100	0.527197	8.48827e-06	3.30743e-05	0.366092	0.0200166	0.0565703	0.704287	0.0135232	0.0515873	0.246562	0.042333	0.0749217	0.252427	8.1557e-05	0.000292898
6-Hydroxymelatonin	Indoles and derivatives	HILIC_PosMS1_690			nonGL	6-Hydroxymelatonin M+H NIST	Organoheterocyclic compounds	Indoles and derivatives	Hydroxyindoles	HMDB0004081	6-Hydroxymelatonin								OMYMRCXOJJZYKE-UHFFFAOYSA-N	C13H16N2O3	1	M+H	249.124		1.98	1.99	67.2973	9.87459	100	100	-0.528253	1.08859e-05	4.21412e-05	-0.435043	0.00604472	0.0221416	-0.627798	0.0304078	0.0880465	-0.22301	0.070525	0.103836	-0.260751	5.6866e-05	0.000209267
PE-Cer 34:1;O2	PE-Cer	RP_NegMSMS_272		Y	nonGL	PE-Cer 18:1;2O/16:0 M-H Atlas --- PE-Cer 22:1;2O/12:0 M-H Atlas													JTVNQMOIYKXJKF-ORIPQNMZNA-N, LSRIFFWJXQGMHZ-ORIPQNMZNA-N	C36H73N2O6P	2	M-H	659.514	140.011	5.53	5.52	61.9946	13.2	87.5	100	-0.515461	1.18625e-05	4.56254e-05	-0.571866	0.000175129	0.00130485	-0.962778	0.000541325	0.00534641	-0.190989	0.114625	0.140172	-0.298916	1.58046e-06	7.1746e-06
Sarcosine	Amino acids, peptides, and analogues	HILIC_PosMSMS_41			nonGL	Sarcosine M+H HMDB --- Sarcosine M+H NIST	Organic acids and derivatives	Carboxylic acids and derivatives	Amino acids, peptides, and analogues	HMDB0000271	Sarcosine								FSYKKLYZXJSNPZ-UHFFFAOYSA-N	C3H7NO2	1	M+H	90.0548		13.47	13.47	13.2432	9.53738	41.1765	100	0.514394	1.22771e-05	4.69172e-05	0.375578	0.0159887	0.047222	0.807106	0.00408518	0.0204539	0.392834	0.000879518	0.00530702	0.255901	5.42757e-05	0.000200975
S-Methylthiocitrulline	Amino acids, peptides, and analogues	HILIC_PosMS1_516			nonGL	N-Acetyl-D-galactosaminitol M+H-H2O NIST --- S-Methyl-L-thiocitrulline M+H NIST	Organic acids and derivatives	Carboxylic acids and derivatives	Amino acids, peptides, and analogues	HMDB0257405	S-Methylthiocitrulline								DWAICOVNOFPYLS-UHFFFAOYSA-N, NGVMVBQRKZPFLB-YFKPBYRVSA-N	C7H15N3O2S	1	M+H --- M+H-H2O	206.1		10.84	10.84	100	5.11564	100	100	-0.512702	1.82032e-05	6.91212e-05	-0.331316	0.037006	0.0885538	-0.742624	0.0095296	0.0395153	-0.182475	0.137528	0.156154	-0.244223	0.000160258	0.000539771
N-Acetyl-D-Glucosamine 6-Phosphate	Carbohydrates and carbohydrate conjugates	HILIC_NegMS1_525			nonGL	N-Acetyl-D-glucosamine 6-phosphate M-H-H2O NIST	Organic oxygen compounds	Organooxygen compounds	Carbohydrates and carbohydrate conjugates	HMDB0001062	N-Acetyl-D-Glucosamine 6-Phosphate								BRGMHAYQAZFZDJ-RTRLPJTCSA-N	C8H16NO9P	1	M-H-H2O	282.037		15.25	15.24	28.1843	11.4856	88.1356	100	0.494326	2.05725e-05	7.76233e-05	0.314466	0.0413131	0.0940548	0.704322	0.0112972	0.0455034	0.298241	0.0113061	0.0304314	0.233975	0.000195046	0.000645991
Arg-Thr	Amino acids, peptides, and analogues	HILIC_PosMS1_829			nonGL	Arg-Thr M+H NIST	Organic acids and derivatives	Carboxylic acids and derivatives	Amino acids, peptides, and analogues	HMDB0028719	Arginylthreonine								XNSKSTRGQIPTSE-UHFFFAOYSA-N	C10H21N5O4	1	M+H	276.17		11.16	11.19	64.0541	5.6666	100	100	-0.50766	2.29488e-05	8.60452e-05	-0.434019	0.00587922	0.0217787	-0.63361	0.0279654	0.0830612	-0.395949	0.000970817	0.00570119	-0.254993	7.7526e-05	0.000280108
TAG 41:2	TAG	RP_PosMS1_791		Y	GL	TG 10:0_10:0_21:2 M+Na Atlas --- TG 10:0_11:0_20:2 M+Na Atlas --- TG 10:0_12:0_19:2 M+Na Atlas --- TG 10:0_13:0_18:2 M+Na Atlas --- TG 10:0_13:1_18:1 M+Na Atlas --- TG 10:0_14:0_17:2 M+Na Atlas --- TG 10:0_14:1_17:1 M+Na Atlas --- TG 10:0_15:0_16:2 M+Na Atlas --- TG 10:0_15:1_16:1 M+Na Atlas --- TG 11:0_11:0_19:2 M+Na Atlas --- TG 11:0_12:0_18:2 M+Na Atlas --- TG 11:0_13:0_17:2 M+Na Atlas --- TG …						Glycerolipids [GL]	Triradylglycerols [GL03]	Triacylglycerols [GL0301]	LMGL03012636 --- LMGL03012723 --- LMGL03013239	TG(12:0/12:0/17:2(9Z,12Z))[iso3] --- TG(12:0/14:1(9Z)/15:1(9Z))[iso6] --- TG(13:0/14:1(9Z)/14:1(9Z))[iso3]	TG 41:2	TG 12:0_12:0_17:2 --- TG 12:0_14:1_15:1 --- TG 13:0_14:1_14:1	ABJLBSOKPALWOT-VYEFPUSRNA-N, AUBGZLYDEYXTPK-KSWDIIKGNA-N, AVGSYRSWLVZFPD-KSWDIIKGNA-N, BBIVPCPHDUEBQH-HCWXFRTBNA-N, BIXMJAWVGLHDCK-AJUAVLHQNA-N, CLBATLYZAVRXJM-HMTRZLGANA-N, CQKWVMUCIUBZQA-GFCQZRJLNA-N, DAVYOFDBNDRYIJ-YJMJMZFLNA-N, DMIQIYSVVLSPRX-BNXAACBSNA-N, DUIMWRKUDZVIEO-VQTQWEQBNA-N, GGKRAAMFCKFMEZ-AUYXYSRINA-N, GJSLDNQOVGZKQJ-AUYXYSRINA-N, HDLZVUQMRFMODT-VYEFPUSRNA-N, HJNRIFPBHHQRNV-KMBURPG…	C44H80O6	1	M+Na	727.58		8.98	8.96	31.7204	5.97917	95.0413	100	0.507668	2.36297e-05	8.80443e-05	0.410582	0.00943747	0.0310948	0.729489	0.0111388	0.0453724	0.195939	0.111342	0.137986	0.255987	7.41253e-05	0.000269455
PC 38:0	PC	RP_PosMSMS_1153		Y	nonGL	PC 38:0 M+Na Atlas						Glycerophospholipids [GP]	Glycerophosphocholines [GP01]	Diacylglycerophosphocholines [GP0101]	LMGP01010976	PC(19:0/19:0)	PC 38:0	PC 19:0/19:0	CJXPNBSAXZBLEC-UHFFFAOYNA-N, FRQSHBOBOSOWLP-UHFFFAOYNA-N	C46H92NO8P	1	M+Na	840.64		7.89	7.9	58.871	14.5812	75.2066	100	-0.482445	2.53102e-05	9.37201e-05	-0.500242	0.000780339	0.00419388	-0.355016	0.201238	0.306696	-0.378565	0.000954681	0.00567088	-0.244572	7.14229e-05	0.000261224
1,5-Naphthalenediamine --- 2,3-Diaminonaphthalene	Xenobiotics	HILIC_PosMSMS_316			nonGL	1,5-Diaminonaphthalene M+H NIST --- 1,8-Diaminonaphthalene M+H NIST --- 2,3-Diaminonaphthalene M+H NIST	Benzenoids	Naphthalenes		HMDB0244231, HMDB0245385	1,5-Naphthalenediamine --- 2,3-Diaminonaphthalene								KQSABULTKYLFEV-UHFFFAOYSA-N, XTBLDMQMUSHDEN-UHFFFAOYSA-N, YFOOEYJGMMJJLS-UHFFFAOYSA-N	C10H10N2	1	M+H	159.091		10.83	10.84	100	7.27007	100	100	-0.4943	3.78671e-05	0.000139351	-0.350184	0.0271099	0.0722567	-0.696892	0.0151189	0.0558999	-0.173805	0.157058	0.167697	-0.239837	0.000211377	0.000684861
PE 34:2	PE	RP_Pos, RP_NegMSMS_757, 337		Y	nonGL	2-Linoleoyl-1-palmitoyl-sn-glycero-3-phosphoethanolamine M+H NIST --- PE 16:0_18:2 M+H Atlas --- PE 16:1_18:1 M+H Atlas, 2-Linoleoyl-1-palmitoyl-sn-glycero-3-phosphoethanolamine M-H NIST --- PE 16:1_18:1 M-H Atlas	Lipids and lipid-like molecules	Glycerophospholipids	Glycerophosphoethanolamines	HMDB0008928	PE(16:0/18:2(9Z,12Z))	Glycerophospholipids [GP]	Glycerophosphoethanolamines [GP02]	Diacylglycerophosphoethanolamines [GP0201]	LMGP02010042	PE(16:0/18:2(9Z,12Z))	PE 34:2	PE 16:0_18:2	HBZNVZIRJWODIB-BCTRXSSUNA-N, HBZNVZIRJWODIB-NHCUFCNUSA-N, RAMNOXDFBNFSFC-LJSPAGPLNA-N, HBZNVZIRJWODIB-NHCUFCNUSA-N, RAMNOXDFBNFSFC-LJSPAGPLNA-N	C39H74NO8P	1, 2	M+H, M-H	716.5184, 714.5087	279.231	5.91	5.87	93.2796	4.19492	100	100	-0.46362	4.03814e-05	0.000146791	-0.409505	0.00564088	0.0212561	-0.55319	0.0414145	0.109273	-0.208956	0.0695963	0.103056	-0.233821	0.000117979	0.000406556
Taurine	Other organic acids and derivatives	HILIC_NegMSMS_47			nonGL	Taurine M-H HMDB --- Taurine M-H NIST	Organic acids and derivatives	Organic sulfonic acids and derivatives	Organosulfonic acids and derivatives	HMDB0000251	Taurine								XOAAWQZATWQOTB-UHFFFAOYSA-N	C2H7NO3S	1	M-H	124.007		13.26	13.28	68.2927	5.60233	100	100	0.463732	4.02442e-05	0.000146791	0.453331	0.00207178	0.00943338	0.781869	0.00352424	0.0180208	0.443209	6.68898e-05	0.000751473	0.253709	2.53885e-05	9.7649e-05
LNAPE N-34:1	LNAPE	RP_NegMSMS_341		Y	nonGL	LNAPE 16:1/N-18:0 M-H Atlas													CEIUQQYYUIRFLA-PEZBUJJGNA-N	C39H76NO8P	2	M-H	716.518	255.233	5.7	5.87	38.5445	6.28882	56.6667	100	-0.45302	4.12794e-05	0.000149146	-0.396598	0.00616011	0.0223149	-0.584848	0.0272075	0.0822191	-0.195986	0.0821361	0.114721	-0.230212	0.000105558	0.000370174
Indole-3-carboxaldehyde	Indoles and derivatives	HILIC_PosMSMS_232	RT_3		nonGL	1H-Indole-4-carboxaldehyde M+H NIST --- 3-Formylindole; LC-ESI-QTOF; MS2; CE M+H MassBank --- Indole-3-carboxaldehyde M+H HMDB --- Indole-3-carboxyaldehyde; LC-ESI-QTOF; MS2; CE M+H MassBank	Organoheterocyclic compounds	Indoles and derivatives	Indoles	HMDB0029737	Indole-3-carboxaldehyde								JFDDFGLNZWNJTK-UHFFFAOYSA-N, OLNJUISKUQQNIM-UHFFFAOYSA-N	C9H7NO	1	M+H	146.06		10.83	10.84	100	11.2455	100	100	-0.488803	4.6042e-05	0.000165352	-0.345685	0.0290092	0.0740096	-0.674362	0.0187118	0.0654901	-0.162154	0.186585	0.186869	-0.236277	0.000262065	0.000839959
SM 44:3;O2	SM	RP_PosMSMS_1218		Y	nonGL	SM 44:3;2O M+Na Atlas													JDBHJRJLTGULOS-SKFHMOIXNA-N	C49H95N2O6P	1	M+Na	861.678		7.7	7.67	41.6667	26.1105	21.4876	100	-0.475746	5.10509e-05	0.000182243	-0.47689	0.00179871	0.00836428	-1.50631	6.68685e-09	4.82113e-06	-0.144844	0.228353	0.210852	-0.299827	1.10849e-06	5.16278e-06
FOH 6:0;O4	Other lipids	HILIC_PosMS1_452	RT_2	Y	nonGL	L-Fucitol M+Na NIST	Organic oxygen compounds	Organooxygen compounds	Carbohydrates and carbohydrate conjugates	HMDB0041500	1-Deoxy-D-glucitol	Fatty Acyls [FA]	Fatty alcohols [FA05]		LMFA05000598	1-Deoxy-D-glucitol	FOH 6:0;O4		SKCKOFZKJLZSFA-UHFFFAOYSA-N	C6H14O5	1	M+Na	189.074		10.84	10.84	100	7.76792	100	100	-0.486341	5.2206e-05	0.000185257	-0.35058	0.0269873	0.0722235	-0.639579	0.0262245	0.0808013	-0.173442	0.158083	0.168444	-0.234581	0.000299228	0.000933967
Thiourea	Others	HILIC_PosMS1_19			nonGL	Thiourea M+H HMDB	Organosulfur compounds	Thioureas		HMDB0034155	Thiourea								UMGDCJDMYOKAJW-UHFFFAOYSA-N	CH4N2S	1	M+H	77.0132		10.18	10.19	98.9189	11.3864	98.3193	100	-0.475263	6.05546e-05	0.000213611	-0.121496	0.442056	0.41144	-0.839982	0.00271747	0.0148429	-0.0978521	0.420569	0.301031	-0.201899	0.00174241	0.00429239
FA 6:0;O2	FA - Fatty Acids and Conjugates	HILIC_PosMS1_375	RT_1	Y	nonGL	6-Propyl-2-thiouracil M+H NIST --- Mevalonic acid M+Na NIST --- Propylthiouracil M+H HMDB	Lipids and lipid-like molecules --- Organoheterocyclic compounds	Fatty Acyls --- Diazines	Fatty acids and conjugates --- Pyrimidines and pyrimidine derivatives	HMDB0000227, HMDB0014690	Mevalonic acid --- Propylthiouracil	Fatty Acyls [FA]	Fatty Acids and Conjugates [FA01]	Hydroxy fatty acids [FA0105]	LMFA01050352	Mevalonic acid	FA 6:0;O2		KJTLQQUUPVSXIM-ZCFIWIBFSA-N, KNAHARQHSZJURB-UHFFFAOYSA-N	C6H12O4, C7H10N2OS	1	M+H --- M+Na	171.063		10.84	10.84	59.7297	22.0155	84.0336	100	-0.476082	6.28728e-05	0.000220484	-0.313796	0.0457962	0.101102	-0.650288	0.0221404	0.0732247	-0.161319	0.184479	0.185414	-0.225766	0.000443331	0.00132812
N-octanoyl-homoserine lactone	Amino acids, peptides, and analogues	HILIC_PosMS1_597			nonGL	N-OCTANOYL-L-HOMOSERINE LACTONE M+H HMDB --- N-Octanoyl-L-homoserine lactone M+H NIST	Organic acids and derivatives	Carboxylic acids and derivatives	Amino acids, peptides, and analogues	HMDB0255213	N-OCTANOYL-L-HOMOSERINE LACTONE	Fatty Acyls [FA]	Fatty amides [FA08]	Fatty acyl homoserine lactones [FA0803]	LMFA08030035	N-octanoyl-homoserine lactone			JKEJEOJPJVRHMQ-JTQLQIEISA-N, JKEJEOJPJVRHMQ-UHFFFAOYSA-N	C12H21NO3	1	M+H	228.159		12.01	11.97	57.5676	12.3148	80.6723	100	-0.480689	6.62326e-05	0.000230908	-0.493061	0.00162223	0.00770761	-0.750987	0.00874967	0.0366767	-0.339526	0.00500377	0.017125	-0.263882	4.01773e-05	0.000151596
PyroGlu-Phe	Amino acids, peptides, and analogues	HILIC_PosMSMS_836	RT_2		nonGL	PyroGlu-Phe M+H NIST	Organic acids and derivatives	Carboxylic acids and derivatives	Amino acids, peptides, and analogues										XCEZCXFVJLMPKG-UHFFFAOYSA-N	C14H16N2O4	1	M+H	277.118		6.43	6.44	67.2973	4.6379	100	100	-0.475804	6.68625e-05	0.000231748	-0.366862	0.0193663	0.0554495	-0.63486	0.0260289	0.0808013	-0.208215	0.0865438	0.117697	-0.234172	0.000269341	0.000858665
Trp-Glu	Amino acids, peptides, and analogues	HILIC_PosMS1_1139	RT_2		nonGL	Lomefloxacin M+H-H2O NIST --- Trp-Glu M+H NIST	Organic acids and derivatives	Carboxylic acids and derivatives	Amino acids, peptides, and analogues	HMDB0029082	Tryptophyl-Glutamate								PWIQCLSQVQBOQV-UHFFFAOYSA-N, ZEKZLJVOYLTDKK-UHFFFAOYSA-N	C16H19N3O5, C17H19F2N3O3	1	M+H --- M+H-H2O	334.139		7.51	7.52	64.3243	8.02333	100	100	-0.469248	6.72646e-05	0.000231795	-0.452603	0.00316608	0.0133071	-0.841433	0.00247883	0.0137477	-0.316885	0.00745467	0.0239982	-0.258328	3.86461e-05	0.000146747
D-myo-Inositol 1,3,4,6-tetrakisphosphate	Alcohols and polyols	HILIC_NegMS1_428			nonGL	D-myo-Inositol-1,3,4,6-tetraphosphate M-2H NIST --- D-myo-Inositol-2,3,5,6-tetraphosphate M-2H NIST	Organic oxygen compounds	Organooxygen compounds	Alcohols and polyols	HMDB0001187	D-myo-Inositol 1,3,4,6-tetrakisphosphate								ZAWIXNGTTZTBKV-UHFFFAOYSA-N, ZAWIXNGTTZTBKV-VLFADPLGSA-N	C6H16O18P4	1	M-2H	248.96		12.95	12.94	100	4.7395	100	100	-0.476397	6.88634e-05	0.00023594	-0.260627	0.100263	0.173011	-0.701876	0.0138389	0.0521347	-0.221197	0.0691431	0.102994	-0.219276	0.000713187	0.00196839
TAG 37:0	TAG	RP_PosMS1_649		Y	GL	TG 10:0_10:0_17:0 M+Na Atlas --- TG 10:0_11:0_16:0 M+Na Atlas --- TG 10:0_12:0_15:0 M+Na Atlas --- TG 10:0_13:0_14:0 M+Na Atlas --- TG 11:0_11:0_15:0 M+Na Atlas --- TG 11:0_12:0_14:0 M+Na Atlas --- TG 11:0_13:0_13:0 M+Na Atlas --- TG 12:0_12:0_13:0 M+Na Atlas --- TG 8:0_10:0_19:0 M+Na Atlas --- TG 8:0_11:0_18:0 M+Na Atlas --- TG 8:0_12:0_17:0 M+Na Atlas --- TG 8:0_13:0_16:0 M+Na Atlas --- TG 8:0_…	Lipids and lipid-like molecules	Glycerolipids	Triradylcglycerols	HMDB0065923, HMDB0071505, HMDB0071509, HMDB0071982, HMDB0072388, HMDB0072464, HMDB0072519, HMDB0072537, HMDB0072777, HMDB0094957, HMDB0096761, HMDB0099422, HMDB0101075, HMDB0101519, HMDB0103717, HMDB0105289, HMDB0105379, HMDB0109596	TG(21:0/8:0/8:0) --- TG(10:0/12:0/15:0) --- TG(10:0/10:0/17:0) --- TG(8:0/10:0/19:0) --- TG(8:0/12:0/17:0) --- TG(8:0/14:0/15:0) --- TG(8:0/8:0/21:0) --- TG(8:0/13:0/16:0) --- TG(10:0/13:0/14:0) --- TG(12:0/12:0/13:0) --- TG(13:0/12:0/12:0) --- TG(14:0/13:0/10:0) --- TG(15:0/12:0/10:0) --- TG(15:0/14:0/8:0) --- TG(16:0/13:0/8:0) --- TG(17:0/10:0/10:0) --- TG(17:0/12:0/8:0) --- TG(19:0/10:0/8:0)	Glycerolipids [GL]	Triradylglycerols [GL03]	Triacylglycerols [GL0301]	LMGL03012627	TG(12:0/12:0/13:0)[iso3]	TG 37:0	TG 12:0_12:0_13:0	ALVGCOWYHHCXQT-UHFFFAOYNA-N, AOSMPNJFZVCVJF-UHFFFAOYNA-N, BVRXCCPVHLBYLO-UHFFFAOYNA-N, CWBCTEGFGHGYPV-UHFFFAOYNA-N, GTJWUAYVJWGJRW-UHFFFAOYNA-N, HMNHFMJKHLCGAQ-UHFFFAOYNA-N, IBXMSBYLNJHOJH-UHFFFAOYNA-N, IHRKXLICEICYIW-UHFFFAOYNA-N, IMDMURCOZNWCLZ-UHFFFAOYNA-N, INGACSGOMHZHKI-UHFFFAOYNA-N, KNNRTSQRFHMFJL-UHFFFAOYNA-N, MEUJPGJVLRLKBL-UHFFFAOYNA-N, OERJCCATXMXPHT-UHFFFAOYNA-N, PILGTDVBHGMWSY-UHFFFAO…	C40H76O6	1	M+Na	675.552		8.9	8.83	29.5699	20.1608	47.9339	100	0.472733	7.42402e-05	0.000252909	0.316504	0.0443452	0.0990097	0.643406	0.0239217	0.0763152	0.218227	0.0719838	0.105383	0.224917	0.000480823	0.00143324
L-Phenylalanine	Amino acids, peptides, and analogues	HILIC_Pos, HILIC_NegMSMS_350, 177			nonGL	D-Phenylalanine M+H HMDB --- DL-Phenylalanine M+H NIST --- L-Phenylalanine M+H HMDB, L-Phenylalanine M-H HMDB	Organic acids and derivatives	Carboxylic acids and derivatives	Amino acids, peptides, and analogues	HMDB0000159	L-Phenylalanine								COLNVLDHVKWLRT-QMMMGPOBSA-N, COLNVLDHVKWLRT-UHFFFAOYSA-N, COLNVLDHVKWLRT-QMMMGPOBSA-N	C9H11NO2	1, 2	M+H, M-H	166.0862, 164.0719	103.053	10.175	10.19	100	2.32713	100	100	-0.47192	7.59961e-05	0.00025742	-0.252763	0.109645	0.182928	-0.656096	0.0211484	0.0712509	-0.182753	0.132783	0.153006	-0.21418	0.000916877	0.00245115
Gly-Pro-Arg	Amino acids, peptides, and analogues	HILIC_PosMS1_1117			nonGL	Gly-Pro-Arg M+H NIST	Organic acids and derivatives	Carboxylic acids and derivatives	Amino acids, peptides, and analogues	HMDB0252828	Glycylprolylarginine								JYPCXBJRLBHWME-UHFFFAOYSA-N	C13H24N6O4	1	M+H	329.189		5.64	5.65	63.7838	7.38366	100	100	-0.47427	8.35641e-05	0.000281455	-0.431732	0.00608823	0.0221771	-0.613632	0.0332167	0.0950349	-0.305517	0.0118593	0.031269	-0.243981	0.000162239	0.000543372
Creatine	Amino acids, peptides, and analogues	HILIC_Pos, HILIC_NegMSMS_167, 62			nonGL	Creatine M+H HMDB --- Creatine M+H NIST, Creatine M-H HMDB	Organic acids and derivatives	Carboxylic acids and derivatives	Amino acids, peptides, and analogues	HMDB0000064	Creatine								CVSVTCORWBXHQV-UHFFFAOYSA-N	C4H9N3O2	1	M+H, M-H	132.0762, 130.0616		13.46	13.44	67.8378	3.53321	99.1597	100	0.456728	8.6209e-05	0.000288732	0.294299	0.0552037	0.113465	0.647963	0.0194383	0.0677041	0.384348	0.000883135	0.00530702	0.216689	0.000560947	0.00162337
PC 33:2	PC	RP_Pos, RP_NegMSMS_844, 510		Y	nonGL	PC 15:0_18:2 M+H Atlas, PC 15:0_18:2 M+HCOO Atlas	Lipids and lipid-like molecules	Glycerophospholipids	Glycerophosphocholines	HMDB0007940	PC(15:0/18:2(9Z,12Z))	Glycerophospholipids [GP]	Glycerophosphocholines [GP01]	Diacylglycerophosphocholines [GP0101]	LMGP01010543	PC(15:0/18:2(9Z,12Z))	PC 33:2	PC 15:0_18:2	DGBYUHHIADYUMU-AKMCNLDWNA-N	C41H78NO8P	1, 2	M+H, M+HCOO	744.5498, 788.5443	241.214	5.58	5.565	77.957	19.0783	100	100	-0.465132	8.74904e-05	0.000291387	-0.459729	0.00286298	0.0123883	-0.653898	0.0207134	0.0704438	-0.312777	0.00868856	0.0264642	-0.248421	8.93596e-05	0.000318998
TAG 62:14	TAG	RP_PosMSMS_1526, 1536		Y	GL	TG 18:2_22:6_22:6 M+NH4 Atlas --- TG 20:4_20:4_22:6 M+NH4 Atlas, TG 18:2_22:6_22:6 M+Na Atlas --- TG 20:4_20:4_22:6 M+Na Atlas	Lipids and lipid-like molecules	Glycerolipids	Triradylcglycerols	HMDB0052829, HMDB0055664	TG(18:2(9Z,12Z)/22:6(4Z,7Z,10Z,13Z,16Z,19Z)/22:6(4Z,7Z,10Z,13Z,16Z,19Z)) --- TG(20:4(8Z,11Z,14Z,17Z)/20:4(8Z,11Z,14Z,17Z)/22:6(4Z,7Z,10Z,13Z,16Z,19Z))	Glycerolipids [GL]	Triradylglycerols [GL03]	Triacylglycerols [GL0301]	LMGL03012429	TG(18:2(9Z,12Z)/22:6(4Z,7Z,10Z,13Z,16Z,19Z)/22:6(4Z,7Z,10Z,13Z,16Z,19Z))[iso3]	TG 62:14	TG 18:2_22:6_22:6	NJFNAWKYWBXFMY-CQMGPDOGNA-N, NVRVRYSEUZDNFH-KXCMKCIENA-N	C65H98O6	1	M+NH4, M+Na	992.7642, 997.7194		9.955	10.065	73.9247	3.78202	100	100	-0.473421	8.87511e-05	0.000293943	-0.345884	0.0294895	0.0749433	-0.852693	0.00277686	0.0150532	-0.243431	0.0467735	0.0803053	-0.241404	0.000197693	0.000651141
Indoleacrylic acid	Indoles and derivatives	HILIC_PosMSMS_369			nonGL	3-Indoleacrylic acid M+H-H2O NIST	Organoheterocyclic compounds	Indoles and derivatives	Indoles	HMDB0000734	Indoleacrylic acid								PLVPPLCLBIEYEA-AATRIKPKSA-N	C11H9NO2	1	M+H-H2O	170.06		10.84	10.84	100	10.0933	100	100	-0.471238	9.19755e-05	0.00030294	-0.332589	0.0360257	0.0878104	-0.667098	0.0201773	0.0692741	-0.176484	0.15056	0.163461	-0.228571	0.000433422	0.00130499
TAG 55:11	TAG	RP_PosMS1_1333		Y	GL	DGGA 16:0_26:1 M+NH4 Atlas --- DGGA 18:0_24:1 M+NH4 Atlas --- DGGA 20:0_22:1 M+NH4 Atlas --- DGGA 21:0_21:1 M+NH4 Atlas --- DGGA 22:0_20:1 M+NH4 Atlas --- DGGA 23:0_19:1 M+NH4 Atlas --- DGGA 24:0_18:1 M+NH4 Atlas --- DGGA 25:0_17:1 M+NH4 Atlas --- DGGA 26:0_16:1 M+NH4 Atlas --- DGGA 27:0_15:1 M+NH4 Atlas --- TG 11:0_16:4_28:7 M+NH4 Atlas --- TG 11:0_18:4_26:7 M+NH4 Atlas --- TG 11:0_18:5_26:6 M+N…						Glycerolipids [GL]	Triradylglycerols [GL03]	Triacylglycerols [GL0301]	LMGL03012972 --- LMGL03014108 --- LMGL03015586 --- LMGL03016103	TG(13:0/20:5(5Z,8Z,11Z,14Z,17Z)/22:6(4Z,7Z,10Z,13Z,16Z,19Z))[iso6] --- TG(15:1(9Z)/18:4(6Z,9Z,12Z,15Z)/22:6(4Z,7Z,10Z,13Z,16Z,19Z))[iso6] --- TG(15:1(9Z)/20:5(5Z,8Z,11Z,14Z,17Z)/20:5(5Z,8Z,11Z,14Z,17Z))[iso3] --- TG(17:2(9Z,12Z)/18:4(6Z,9Z,12Z,15Z)/20:5(5Z,8Z,11Z,14Z,17Z))[iso6]	TG 55:11	TG 13:0_20:5_22:6 --- TG 15:1_18:4_22:6 --- TG 15:1_20:5_20:5 --- TG 17:2_18:4_20:5	AXWJYGQVVMWITG-HUPNWCHHNA-N, BUIBYGULCCSLLL-KJLXSEPWNA-N, BVAKKPJATBQDQA-PIKDQZOFNA-N, BZCFKIIFHPNSER-QQTULTPQNA-N, CVSDMYYDTFKCLZ-MRCUWXFGNA-N, CYZWETPNILMRFT-GUVXTBGONA-N, DOLOZBUILCHYCP-XNUQYZRDNA-N, FEWNYTHMMYGYRV-FENBJABLNA-N, GAUVZHKQTZGONR-JNWICJMFNA-N, GKHMKBOPKYODPA-YHAVHNCKNA-N, GUWSQQUHEIJTGD-CDDOXDSXNA-N, GZBDSUQPMBSFJZ-VZCXRCSSNA-N, HETFOPYLYNLPMH-CTBPURIUNA-N, IHSJLNREBCOCHE-LJACGMF…	C58H90O6	1	M+NH4	900.709		10.18	10.15	73.3871	3.54303	100	100	0.467251	9.27696e-05	0.000303876	0.322098	0.040795	0.0936389	0.31674	0.2719	0.361691	0.0536249	0.661411	0.377179	0.206947	0.00141332	0.00358539
1-Methylguanosine --- 2-Methylguanosine	Purine nucleosides	HILIC_PosMS1_955	RT_1		nonGL	1-Methylguanosine M+H FiehnHILIC --- 1-Methylguanosine M+H HMDB --- 2'-O-Methylguanosine M+H FiehnHILIC --- 2-Methylguanosine M+H HMDB --- 3'-O-Methylguanosine M+H FiehnHILIC --- 7-Methylguanosine M FiehnHILIC --- 7-Methylguanosine M+H NIST --- Janex 1 M+H NIST --- N2-Methylguanosine M+H FiehnHILIC	Nucleosides, nucleotides, and analogues	Purine nucleosides		HMDB0001563, HMDB0005862	1-Methylguanosine --- 2-Methylguanosine								HOZUXBLMYUPGPZ-UHFFFAOYSA-N, OGHAROSJZRTIOK-AMKBJPJNSA-N, OVYNGSFVYRPRCG-UHFFFAOYNA-N, SLEHROROQDYRAW-KQYNXXCUSA-N, SLEHROROQDYRAW-UHFFFAOYNA-N, UTAIYTHAJQNQDW-KQYNXXCUSA-N, UTAIYTHAJQNQDW-UHFFFAOYNA-N, UYARPHAXAJAZLU-UHFFFAOYNA-N	C11H15N5O5	1	M --- M+H	298.116		3.89	3.9	62.973	25.6417	96.6387	100	-0.471589	9.88494e-05	0.000322022	-0.315569	0.04804	0.104367	-0.284279	0.33066	0.400675	-0.345467	0.00438813	0.0158773	-0.205315	0.00179336	0.00439972
N-alpha-Acetyl-L-citrulline	Amino acids, peptides, and analogues	HILIC_NegMSMS_328			nonGL	N-alpha-Acetyl-L-citrulline M-H HMDB	Organic acids and derivatives	Carboxylic acids and derivatives	Amino acids, peptides, and analogues	HMDB0000856	N-alpha-Acetyl-L-citrulline								WMQMIOYQXNRROC-LURJTMIESA-N	C8H15N3O4	1	M-H	216.098		8.92	8.95	40.6504	18.5961	65.2542	100	0.460803	0.000107413	0.000348017	0.181659	0.24986	0.306216	0.389128	0.173906	0.281419	0.232729	0.0535287	0.0887942	0.184325	0.00448557	0.00955041
3-Indolebutyric acid	Indoles and derivatives	HILIC_PosMS1_440	RT_2		nonGL	3-Hydroxydiphenylamine M+H NIST --- 4-(Phenylamino)phenol M+H NIST --- Indole-3-butyric acid M+H-H2O NIST	Organoheterocyclic compounds	Indoles and derivatives	Indoles	HMDB0002096	3-Indolebutyric acid								JTEDVYBZBROSJT-UHFFFAOYSA-N, JTTMYKSFKOOQLP-UHFFFAOYSA-N, NDACNGSDAFKTGE-UHFFFAOYSA-N	C12H11NO, C12H13NO2	1	M+H --- M+H-H2O	186.095		3.3	3.3	59.7297	11.8119	100	100	-0.46998	0.000108214	0.000348719	-0.307989	0.0542299	0.112486	-0.269116	0.358096	0.418448	-0.374337	0.00197432	0.00919191	-0.202718	0.00210516	0.00502005
Betonicine	Amino acids, peptides, and analogues	HILIC_PosMSMS_323			nonGL	Betonicine M+H HMDB	Organic acids and derivatives	Carboxylic acids and derivatives	Amino acids, peptides, and analogues	HMDB0029412	Betonicine								MUNWAHDYFVYIKH-RITPCOANSA-N	C7H13NO3	1	M+H	160.095		10.93	10.84	81.6216	10.1376	99.1597	100	-0.452621	0.000113383	0.00036341	-0.217546	0.161189	0.233918	-0.847523	0.00213458	0.0125122	-0.0104346	0.930731	0.449481	-0.212672	0.000785843	0.00214903
Cinnamaldehyde --- L-3-Cyanoalanine	Amino acids, peptides, and analogues	HILIC_PosMSMS_95			nonGL	.beta.-Cyano-L-alanine M+H NIST --- trans-Cinnamaldehyde M+H-H2O NIST	Phenylpropanoids and polyketides --- Organic acids and derivatives	Cinnamaldehydes --- Carboxylic acids and derivatives	NA --- Amino acids, peptides, and analogues	HMDB0003441, HMDB0060245	Cinnamaldehyde --- L-3-Cyanoalanine								BXRLWGXPSRYJDZ-VKHMYHEASA-N, KJPRLNWUNMBNBZ-QPJJXVBHSA-N	C4H6N2O2, C9H8O	1	M+H --- M+H-H2O	115.054		10.85	10.82	72.4324	10.2879	100	100	-0.465536	0.000114507	0.000365052	-0.346702	0.0287298	0.0738717	-0.59617	0.0385753	0.105802	-0.178183	0.146782	0.162779	-0.225642	0.00052232	0.00153392
Melatonin	Indoles and derivatives	HILIC_NegMS1_379			nonGL	Aminoglutethimide M-H HMDB --- Melatonin M-H FiehnHILIC --- Melatonin M-H HMDB	Organoheterocyclic compounds	Indoles and derivatives	Indoles	HMDB0001389	Melatonin								DRLFMBDRBRZALE-UHFFFAOYSA-N, ROBVIMPUHSLWNV-UHFFFAOYSA-N	C13H16N2O2	1	M-H	231.114		6.41	6.42	63.6856	13.7137	100	100	-0.459648	0.000118761	0.000376598	-0.347691	0.0265801	0.0714254	-0.538626	0.0594238	0.142338	-0.279877	0.0200668	0.0448929	-0.22107	0.000597924	0.00171374
N-Acetyllactosamine	Carbohydrates and carbohydrate conjugates	HILIC_PosMS1_1281			nonGL	Glycan Galacto-N-biose M+H-H2O NIST --- Glycan Lacto-N-biose M+H-H2O NIST --- Glycan N-Acetyllactosamine M+H-H2O NIST --- N-Acetyl-D-lactosamine M+H-H2O NIST	Organic oxygen compounds	Organooxygen compounds	Carbohydrates and carbohydrate conjugates	HMDB0001542	N-Acetyllactosamine								KFEUJDWYNGMDBV-LODBTCKLSA-N	C14H25NO11	1	M+H-H2O	366.142		5.64	5.65	64.0541	12.6829	100	100	-0.454399	0.000122338	0.00038589	-0.44843	0.00352698	0.0144533	-0.872834	0.00168942	0.0107792	-0.211013	0.0786458	0.112274	-0.255022	5.11559e-05	0.000191806
Cer 34:1;O2	Cer	RP_Pos, RP_NegMSMS_418, 158, 193		Y	nonGL	Cer 18:1;2O/16:0 M+H Atlas, Cer 18:1;2O/16:0 M-H Atlas, Cer 18:1;2O/16:0 M+HCOO Atlas	Lipids and lipid-like molecules	Sphingolipids	Ceramides	HMDB0004949, HMDB0249508	Cer(d18:1/16:0) --- C16-Ceramide	Sphingolipids [SP]	Ceramides [SP02]	N-acylsphingosines (ceramides) [SP0201]	LMSP02010004	Cer(d18:1/16:0)	Cer 34:1;O2	Cer 18:1;O2/16:0	YDNKGFDKKRUKPY-ORIPQNMZNA-N	C34H67NO3	2	M+H, M-H, M+HCOO	538.5154, 536.5046, 582.5099	264.2633, 237.2212, 237.2216	6.38	6.35	62.6344	6.67813	99.1736	100	-0.433471	0.000124925	0.000391975	-0.483136	0.000919488	0.00478477	-0.828991	0.00179983	0.0111867	-0.200748	0.0798505	0.113619	-0.252792	2.44433e-05	9.52426e-05
CoQ6	Vitamins and cofactors	RP_PosMSMS_494			nonGL	CoQ6 M+H Atlas	Lipids and lipid-like molecules	Prenol lipids	Quinone and hydroquinone lipids	HMDB0036062	Ubiquinone 6								GXNFPEOUKFOTKY-UHFFFAOYSA-N	C39H58O4	2	M+H	591.437	197.079	10.08	10.02	32.5269	14.7791	99.1736	100	0.450125	0.000126872	0.000396	0.269262	0.0822889	0.151557	0.45738	0.104374	0.205546	0.166965	0.162363	0.171169	0.200268	0.00165273	0.00409571
FA 7:1;O2 --- FA 7:2;O	FA - Fatty Acids and Conjugates --- FA - Fatty esters	HILIC_PosMS1_216		Y	nonGL	2-Ethyl-4-hydroxy-5-methyl-3(2H)-furanone M+H NIST --- 3,3-Dimethylglutaric acid M+H-H2O NIST --- 3-Acetyl-3-methyldihydrofuran-2-one M+H NIST --- 3-Methyladipic acid M+H-H2O NIST --- Pimelic acid M+H-H2O NIST	Lipids and lipid-like molecules --- Organoheterocyclic compounds	Fatty Acyls --- Dihydrofurans	Fatty acids and conjugates --- Furanones	HMDB0000857, HMDB0002441, HMDB0033736	Pimelic acid --- 3,3-Dimethylglutaric acid --- Homofureanol	Fatty Acyls [FA]	Fatty Acids and Conjugates [FA01] --- Fatty esters [FA07]	Dicarboxylic acids [FA0117] --- Lactones [FA0704]	LMFA01170051 --- LMFA01170086 --- LMFA01170095 --- LMFA07040006	3,3-dimethyl-glutaric acid --- 3-acetyl-3-methyldihydrofuran-2(3H)-one --- 3-methyl-adipic acid --- Pimelic acid	FA 7:1;O2 --- FA 7:2;O		DUHQIGLHYXLKAE-UHFFFAOYSA-N, GWCRPYGYVRXVLI-UHFFFAOYSA-N, SYEOWUNSTUDKGM-UHFFFAOYSA-N, VKDGCPFTXXDWQJ-UHFFFAOYSA-N, WLJVNTCWHIRURA-UHFFFAOYSA-N	C7H10O3, C7H12O4	1	M+H --- M+H-H2O	143.072		10.84	10.84	88.3784	10.2447	66.3866	100	-0.461051	0.000131923	0.000409621	-0.318885	0.0444089	0.0990097	-0.691991	0.0157318	0.0572847	-0.159165	0.19486	0.191811	-0.22458	0.000546991	0.0015907
Cyproterone	ST - Steroids derivatives	HILIC_PosMS1_1317		Y	nonGL	Cyproteron M+H HMDB --- Cyproterone M+H HMDB --- Cys-Pro-Arg M+H NIST --- Pro-Cys-Arg M+H NIST	Lipids and lipid-like molecules	Steroids and steroid derivatives	Pregnane steroids	HMDB0015587	Cyproterone								AIZVVCMAFRREQS-UHFFFAOYSA-N, DUSHUSLJJMDGTE-UHFFFAOYSA-N, DUSHUSLJJMDGTE-ZJPMUUANSA-N, ZOKPRHVIFAUJPV-UHFFFAOYSA-N	C22H27ClO3	1	M+H	375.175		5.94	5.96	64.3243	24.2083	100	100	-0.458279	0.000136584	0.00041972	-0.414449	0.00816789	0.0277484	-0.828045	0.00345883	0.0179408	-0.307197	0.0108835	0.0296024	-0.247788	0.000113077	0.000391931
FA 5:1;O	FA - Fatty Acids and Conjugates	HILIC_PosMSMS_103		Y	nonGL	Ketoisovaleric acid M+H FiehnHILIC --- alpha-Ketoisovaleric acid M+H HMDB	Organic acids and derivatives	Keto acids and derivatives	Short-chain keto acids and derivatives	HMDB0000019	alpha-Ketoisovaleric acid	Fatty Acyls [FA]	Fatty Acids and Conjugates [FA01]	Methyl branched fatty acids [FA0102]	LMFA01020274	3-methyl-2-oxo-butanoic acid	FA 5:1;O		QHKABHOOEWYVLI-UHFFFAOYSA-N	C5H8O3	1	M+H	117.057		10.84	10.84	100	10.2303	100	100	-0.460877	0.000136459	0.00041972	-0.319703	0.0442057	0.0990097	-0.630507	0.0284886	0.0841797	-0.145474	0.237228	0.215727	-0.221401	0.000677904	0.00189737
Asn-Pro	Amino acids, peptides, and analogues	HILIC_PosMSMS_537	RT_2		nonGL	Asn-Pro M+H-H2O NIST	Organic acids and derivatives	Carboxylic acids and derivatives	Amino acids, peptides, and analogues	HMDB0028739	Asparaginyl-Proline								GADKFYNESXNRLC-UHFFFAOYSA-N	C9H15N3O4	1	M+H-H2O	212.103		3.88	3.88	65.6757	5.20089	100	100	-0.461253	0.000137604	0.000420687	-0.316496	0.0467227	0.102116	-0.268013	0.357831	0.418448	-0.318016	0.00877271	0.0265124	-0.201656	0.00211888	0.00503263
Cholesterol	ST - Cholesterol	RP_PosMS1_181		Y	nonGL	Cholestan-3-one M+H HMDB --- Cholestan-3-one, (5.alpha.)- M+H NIST --- Cholesterol; LC-ESI-QTOF; MS2; CE M+H MassBank --- Coprostanone; LC-APPI-QQ; MS2; CE M+H MassBank --- Epicholesterol M+H HMDB	Lipids and lipid-like molecules	Steroids and steroid derivatives	Cholestane steroids	HMDB0000067	Cholesterol	Sterols [ST]	Sterols [ST01]	Cholesterol and derivatives [ST0101]	LMST01010174	5alpha-cholestanone	ST 27:1;O		HVYWMOMLDIMFJA-UHFFFAOYNA-N, HVYWMOMLDIMFJA-UHFFFAOYSA-N, PESKGJQREUXSRR-JAGYRSRJSA-N, PESKGJQREUXSRR-UHFFFAOYSA-N, PESKGJQREUXSRR-UXIWKSIVSA-N	C27H46O	1	M+H	387.36		9.29	9.22	26.6129	14.7431	81.8182	100	0.44333	0.00014438	0.000439151	0.401971	0.00821595	0.0277678	0.775262	0.0048725	0.0235515	0.275917	0.0187718	0.0427358	0.238516	0.00013026	0.000443746
Cinnamic acid --- trans-Cinnamic acid	Cinnamic acids and derivatives	HILIC_Neg, HILIC_PosMSMS_114, 163			nonGL	Cinnamic acid M-H HMDB --- trans-Cinnamic acid M-H HMDB, trans-Cinnamic acid M+H-H2O NIST	Phenylpropanoids and polyketides	Cinnamic acids and derivatives	Cinnamic acids	HMDB0000567, HMDB0000930	Cinnamic acid --- trans-Cinnamic acid								WBYWAXJHAXSJNI-SREVYHEPSA-N, WBYWAXJHAXSJNI-VOTSOKGWSA-N, WBYWAXJHAXSJNI-VOTSOKGWSA-N	C9H8O2	1	M-H, M+H-H2O	147.0448, 131.0485		10.185	10.19	100	3.93971	100	100	-0.451895	0.000150854	0.000456515	-0.274602	0.080617	0.14974	-0.651665	0.0215439	0.072246	-0.148706	0.220499	0.206463	-0.212049	0.000990822	0.00262528
TAG 58:8	TAG	RP_PosMSMS_1440, 1449		Y	GL	TG 18:0_18:2_22:6 M+NH4 Atlas --- TG 18:1_18:1_22:6 M+NH4 Atlas, TG 18:1_18:1_22:6 M+Na Atlas	Lipids and lipid-like molecules	Glycerolipids	Triradylcglycerols	HMDB0010465, HMDB0045098	TG(18:1(9Z)/18:1(9Z)/22:6(4Z,7Z,10Z,13Z,16Z,19Z)) --- TG(18:0/18:2(9Z,12Z)/22:6(4Z,7Z,10Z,13Z,16Z,19Z))	Glycerolipids [GL]	Triradylglycerols [GL03]	Triacylglycerols [GL0301]	LMGL03011388 --- LMGL03011389, LMGL03011389	TG(18:0/18:2(9Z,12Z)/22:6(4Z,7Z,10Z,13Z,16Z,19Z))[iso6] --- TG(18:1(9Z)/18:1(9Z)/22:6(4Z,7Z,10Z,13Z,16Z,19Z))[iso3], TG(18:1(9Z)/18:1(9Z)/22:6(4Z,7Z,10Z,13Z,16Z,19Z))[iso3]	TG 58:8	TG 18:0_18:2_22:6 --- TG 18:1_18:1_22:6, TG 18:1_18:1_22:6	HHLFQZIIXPUFCA-AQEYAGOHNA-N, QFVBKJOYLFHVKV-DNVUEQEENA-N, QFVBKJOYLFHVKV-DNVUEQEENA-N	C61H102O6	1	M+NH4, M+Na	948.7956, 953.7513		10.755	10.715	71.7742	5.2797	90.0826	100	-0.45546	0.000166069	0.000500017	-0.382244	0.0156065	0.0463019	-0.994912	0.000412634	0.00457697	-0.255274	0.0364699	0.0678906	-0.250213	0.000105286	0.000370174
NAE 18:3	NAE	RP_PosMS1_37	RT_2	Y	nonGL	.alpha.-Linolenoyl ethanolamide M+H NIST --- Alpha-Linolenoyl ethanolamide M+H HMDB --- NAE 18:3 M+H Atlas	Organic nitrogen compounds	Organonitrogen compounds	Amines	HMDB0013624	Alpha-Linolenoyl ethanolamide	Fatty Acyls [FA]	Fatty amides [FA08]	N-acyl ethanolamides (endocannabinoids) [FA0804]	LMFA08040007	Anandamide (18:3, n-3)	NAE 18:3		HBJXRRXWHSHZPU-PDBXOOCHSA-N	C20H35NO2	1	M+H	322.273		3.32	3.33	70.6989	8.97181	100	100	-0.429009	0.000169728	0.000508469	-0.41206	0.0054651	0.0208332	-0.668522	0.0134518	0.0515873	-0.220016	0.056475	0.0919522	-0.230511	0.000156812	0.000531166
Homocysteine	Amino acids, peptides, and analogues	HILIC_PosMS1_186			nonGL	1-Hydroxybenzotriazole M+H HMDB --- DL-Homocysteine M+H NIST --- Homocysteine M+H FiehnHILIC --- L-Homocysteine; LC-ESI-ITFT; MS2; m/z M+H MassBank	Organic acids and derivatives	Carboxylic acids and derivatives	Amino acids, peptides, and analogues	HMDB0000742	Homocysteine								ASOKPJOREAFHNY-UHFFFAOYSA-N, FFFHZYDWPBMWHY-UHFFFAOYNA-N, FFFHZYDWPBMWHY-UHFFFAOYSA-N, FFFHZYDWPBMWHY-VKHMYHEASA-N	C4H9NO2S, C6H5N3O	1	M+H	136.048		13.44	13.44	50.8108	4.52539	92.437	100	0.43944	0.000172411	0.000513922	0.291116	0.058478	0.118707	0.566783	0.0421214	0.110432	0.373987	0.00126879	0.00669378	0.206867	0.0010532	0.0027418
4-Aminohippuric acid	Benzenoids	HILIC_PosMS1_474	RT_2		nonGL	2-[(4-Aminobenzoyl)amino]acetic acid M+H NIST --- 4-Aminohippuric acid M+H HMDB --- Anthrone M+H HMDB	Benzenoids	Benzene and substituted derivatives	Benzoic acids and derivatives	HMDB0001867	4-Aminohippuric acid								HSMNQINEKMPTIC-UHFFFAOYSA-N, RJGDLRCDCYRQOQ-UHFFFAOYSA-N	C14H10O, C9H10N2O3	1	M+H	195.077		3.87	3.88	64.5946	4.73439	100	100	-0.454508	0.000173879	0.000515719	-0.327846	0.0391065	0.0911335	-0.295923	0.309447	0.38392	-0.314124	0.00962628	0.0280351	-0.203204	0.00193634	0.0047107
TAG 39:1	TAG	RP_PosMS1_712		Y	GL	TG 10:0_10:0_19:1 M+Na Atlas --- TG 10:0_11:0_18:1 M+Na Atlas --- TG 10:0_12:0_17:1 M+Na Atlas --- TG 10:0_13:0_16:1 M+Na Atlas --- TG 10:0_13:1_16:0 M+Na Atlas --- TG 10:0_14:0_15:1 M+Na Atlas --- TG 10:0_14:1_15:0 M+Na Atlas --- TG 11:0_11:0_17:1 M+Na Atlas --- TG 11:0_12:0_16:1 M+Na Atlas --- TG 11:0_13:0_15:1 M+Na Atlas --- TG 11:0_13:1_15:0 M+Na Atlas --- TG 11:0_14:0_14:1 M+Na Atlas --- TG …						Glycerolipids [GL]	Triradylglycerols [GL03]	Triacylglycerols [GL0301]	LMGL03012631 --- LMGL03013178	TG(12:0/12:0/15:1(9Z))[iso3] --- TG(12:0/13:0/14:1(9Z))[iso6]	TG 39:1	TG 12:0_12:0_15:1 --- TG 12:0_13:0_14:1	AEPAKQMWLRHTON-DQRAZIAONA-N, AQYPIBYNAADKPO-MNDPQUGUNA-N, BBRIMRPMCQWXEF-MRCUWXFGNA-N, BNWOIAUJPRAQSO-KAMYIIQDNA-N, BQYICJHKMGCXOQ-VLGSPTGONA-N, CRWNGZADMCSVKY-SSZFMOIBNA-N, FAFCXVAVLQJEHP-ZPHPHTNENA-N, FTRINXWVJXWHKR-MRCUWXFGNA-N, GXBQDYJEGMRFDF-HNENSFHCNA-N, HBCNBHWXBORAMB-MRCUWXFGNA-N, HCSZMYATPOLFRR-MRCUWXFGNA-N, IKBBDIHZVHYDEH-VXPUYCOJNA-N, JLXAORICLBIUMF-KAMYIIQDNA-N, JLZOTGJLPOKPEM-MRCUWXF…	C42H78O6	1	M+Na	701.566		8.89	8.86	32.2581	9.14065	95.8678	100	0.453426	0.000193966	0.00057245	0.386278	0.0150369	0.0453442	0.781377	0.00651457	0.0292328	0.287777	0.0185882	0.0426404	0.238976	0.000243636	0.000785114
PE-Cer 40:1;O2	PE-Cer	RP_NegMSMS_397		Y	nonGL	PE-Cer 26:1;2O/14:0 M-H Atlas													ZFNKBBNWUOIMCB-LAPDZXRHNA-N	C42H85N2O6P	2	M-H	743.607	140.01	7.45	7.45	38.0054	19.3754	72.5	100	-0.443507	0.000198323	0.000582425	-0.534589	0.000470388	0.00280382	-0.861004	0.00207928	0.0123271	-0.208814	0.0834333	0.115596	-0.266389	2.37139e-05	9.30084e-05
FAHFA 20:3/18:2	FAHFA	RP_NegMSMS_195		Y	nonGL	FAHFA 20:3/18:2 M-H Atlas													USUSTUYMQMESAZ-MDRZFJLHNA-N	C38H64O4	2	M-H	583.471	255.232	3.59	3.59	12.6685	7.76481	39.1667	100	-0.444438	0.000206829	0.000604428	-0.396943	0.0109939	0.0349922	-0.579098	0.0423608	0.110658	-0.210693	0.0821121	0.114721	-0.227512	0.000400125	0.00121703
CoQ10	Vitamins and cofactors	RP_PosMSMS_1229			nonGL	CoQ10 M+H Atlas	Lipids and lipid-like molecules	Prenol lipids	Quinone and hydroquinone lipids	HMDB0255555	Ensorb								ACTIUHUUMQJHFO-UHFFFAOYSA-N	C59H90O4	1	M+H	863.685		10.09	10.05	41.129	5.24241	100	100	0.437158	0.000210914	0.000613359	0.359369	0.0197631	0.0563394	0.533014	0.0581822	0.140296	0.225528	0.0584062	0.0940298	0.216388	0.000649252	0.00182574
Ala-Ala-Ala	Amino acids, peptides, and analogues	HILIC_PosMS1_1578	RT_1		nonGL	L-Ala-L-Ala-L-Ala 2M+H NIST	Organic acids and derivatives	Carboxylic acids and derivatives	Amino acids, peptides, and analogues	HMDB0248092	Ala-Ala-Ala								BYXHQQCXAJARLQ-ZLUOBGJFSA-N	C9H17N3O4	1	2M+H	463.251		5.1	5.1	62.4324	18.1789	97.479	100	-0.447792	0.000218747	0.000633051	-0.456542	0.00362785	0.0147744	-0.655799	0.0225779	0.0736577	-0.366127	0.00235844	0.0103289	-0.243006	0.000172698	0.00057517
TAG 55:4	TAG	RP_PosMSMS_1371		Y	GL	TG 18:1_18:2_19:1 M+NH4 Atlas						Glycerolipids [GL]	Triradylglycerols [GL03]	Triacylglycerols [GL0301]	LMGL03016219	TG(18:1(9Z)/18:2(9Z,12Z)/19:1(9Z))[iso6]	TG 55:4	TG 18:1_18:2_19:1	DKILRNXFVWECGW-JNKAIAEUNA-N	C58H104O6	1	M+NH4	914.811		11.05	11.05	58.6022	29.124	87.6033	100	0.443715	0.000239283	0.000689134	0.381408	0.0154951	0.0461868	0.764758	0.00728272	0.031631	0.233506	0.0554112	0.0906195	0.234461	0.000287183	0.000905858
L-Tryptophan	Indoles and derivatives	HILIC_Pos, HILIC_NegMSMS_515, 293, 446, 1435, 879			nonGL	D-Tryptophan M+H HMDB --- L-Tryptophan M+H NIST, D-Tryptophan M-H HMDB --- L-Tryptophan M-H HMDB --- L-Tryptophan M-H NIST --- Tryptophan; LC-ESI-ITFT; MS2; HCD; CE 90.0 eV; [M-H]- M-H MassBank, L-Tryptophan M+H-NH3 NIST, L-Tryptophan 2M+H NIST, L-Tryptophan 2M-H NIST	Organoheterocyclic compounds	Indoles and derivatives	Indolyl carboxylic acids and derivatives	HMDB0013609, HMDB0030396, HMDB0000929	L-Tryptophan --- D-Tryptophan --- (¬±)-Tryptophan								QIVBCDIJIAJPQS-SECBINFHSA-N, QIVBCDIJIAJPQS-UHFFFAOYSA-N, QIVBCDIJIAJPQS-SECBINFHSA-N, QIVBCDIJIAJPQS-UHFFFAOYNA-N, QIVBCDIJIAJPQS-UHFFFAOYSA-N, QIVBCDIJIAJPQS-VIFPVBQESA-N, QIVBCDIJIAJPQS-UHFFFAOYSA-N	C11H12N2O2	1	M+H, M-H, M+H-NH3, 2M+H, 2M-H	205.0969, 203.0824, 188.0709, 409.1864, 407.1703		10.86	10.84	100	7.66704	100	100	-0.447126	0.000243278	0.000697272	-0.337621	0.0343623	0.0853423	-0.572122	0.0486517	0.121796	-0.228968	0.0627439	0.0967502	-0.217505	0.00091637	0.00245115
Indoleacetaldehyde --- Serotonin	Indoles and derivatives	HILIC_PosMSMS_319	RT_1		nonGL	3-Acetylindole; LC-ESI-QTOF; MS2; CE M+H MassBank --- Indole-3-acetaldehyde; LC-ESI-QTOF; MS2; CE M+H MassBank --- L-Canavanine M+H-NH3 NIST --- N-Acetylindole; LC-ESI-QTOF; MS2; CE M+H MassBank --- Serotonin M+H-NH3 NIST	Organoheterocyclic compounds	Indoles and derivatives	Tryptamines and derivatives --- Indoles	HMDB0000259, HMDB0001190	Serotonin --- Indoleacetaldehyde								FSBIGDSBMBYOPN-UHFFFAOYSA-N, QZAYGJVTTNCVMB-UHFFFAOYSA-N, UUCUQJHYUPXDHN-UHFFFAOYSA-N, VUIMBZIZZFSQEE-UHFFFAOYSA-N, WHOOUMGHGSPMGR-UHFFFAOYSA-N	C10H12N2O, C10H9NO	1	M+H --- M+H-NH3	160.075		10.85	10.84	55.6757	8.5088	51.2605	100	-0.445335	0.000255274	0.000728154	-0.368121	0.0206247	0.0577908	-0.715736	0.0129619	0.0505154	-0.115044	0.352892	0.273041	-0.229985	0.000427805	0.00129462
Gly-Trp	Amino acids, peptides, and analogues	HILIC_PosMS1_757	RT_1		nonGL	Gly-Trp M+H NIST --- Imazapyr M+H HMDB	Organic acids and derivatives	Carboxylic acids and derivatives	Amino acids, peptides, and analogues	HMDB0028852	Glycyl-Tryptophan								AJHCSUXXECOXOY-UHFFFAOYSA-N, CLQMBPJKHLGMQK-UHFFFAOYSA-N	C13H15N3O3	1	M+H	262.121		2.82	2.8	37.027	7.73643	100	100	-0.444673	0.000260398	0.000739234	-0.309664	0.0525295	0.110166	-0.277983	0.341646	0.405802	-0.366861	0.00241453	0.010344	-0.196248	0.0029158	0.00663467
PG 34:0	PG	RP_Pos, RP_NegMS1_920, 417		Y	nonGL	1-Palmitoyl-2-stearoyl-sn-glycero-3-phospho-rac-1-glycerol M+H+H2O NIST --- SL 20:3;O/26:7 M+NH4 Atlas, 1-Palmitoyl-2-stearoyl-sn-glycero-3-phospho-rac-1-glycerol M-H NIST --- PG 10:0_24:0 M-H Atlas --- PG 11:0_23:0 M-H Atlas --- PG 12:0_22:0 M-H Atlas --- PG 13:0_21:0 M-H Atlas --- PG 14:0_20:0 M-H Atlas --- PG 15:0_19:0 M-H Atlas --- PG 16:0_18:0 M-H Atlas --- PG 17:0_17:0 M-H Atlas --- PG 7:0_…	Lipids and lipid-like molecules	Glycerophospholipids	Glycerophosphoglycerols	HMDB0010572	PG(16:0/18:0)	Glycerophospholipids [GP]	Glycerophosphoglycerols [GP04]	Diacylglycerophosphoglycerols [GP0401]	LMGP04010907, LMGP04010895 --- LMGP04010907 --- LMGP04010913 --- LMGP04010925 --- LMGP04010933 --- LMGP04010939	PG(16:0/18:0), PG(12:0/22:0) --- PG(13:0/21:0) --- PG(14:0/20:0) --- PG(15:0/19:0) --- PG(16:0/18:0) --- PG(17:0/17:0)	PG 34:0	PG 16:0_18:0, PG 12:0_22:0 --- PG 13:0_21:0 --- PG 14:0_20:0 --- PG 15:0_19:0 --- PG 16:0_18:0 --- PG 17:0/17:0	KBPVYRBBONZJHF-YWIOZPJLSA-N, KWXMWQHAJCWDRL-TUYMOWKKNA-N, AUGXCMPPEGEWRY-UHFFFAOYNA-N, COQWJWFHZUPHCO-UHFFFAOYNA-N, FFWBVTHGHZROME-UHFFFAOYNA-N, ICHMRBWWTMPPQQ-UHFFFAOYNA-N, KBPVYRBBONZJHF-UHFFFAOYNA-N, KBPVYRBBONZJHF-YWIOZPJLSA-N, MHMSBAHLAXFCQT-UHFFFAOYNA-N, QVTMHGKJALUQCM-UHFFFAOYNA-N, RHKLEUQCQMMTHF-UHFFFAOYNA-N, SPFRLTWPPAORML-UHFFFAOYNA-N, YZERRSGGSIATBM-UHFFFAOYNA-N, ZBVHXVKEMAIWQQ-UHFFFAO…	C40H79O10P	1	M+H+H2O --- M+NH4, M-H	769.5532, 749.5322		6.37	6.345	100	21.9881	100	100	-0.445292	0.000266968	0.000754291	-0.330919	0.0385782	0.0903377	-0.354744	0.22559	0.32858	-0.153348	0.216026	0.205219	-0.204238	0.00197109	0.00473824
sn-Glycero-3-phosphocholine	Other lipids	HILIC_PosMSMS_733		Y	nonGL	sn-Glycero-3-phosphocholine; LC-ESI-QTOF; MS2; CE M MassBank														C8H21NO6P	2	M	258.11	104.106	14.49	14.46	58.1081	2.65494	100	100	0.426557	0.00028039	0.000788478	0.162195	0.295776	0.337273	0.510373	0.0681868	0.156416	0.227507	0.0546423	0.0899312	0.177571	0.00534647	0.0110672
Met-Gln	Amino acids, peptides, and analogues	HILIC_PosMS1_837			nonGL	Met-Gln M+H NIST	Organic acids and derivatives	Carboxylic acids and derivatives	Amino acids, peptides, and analogues	HMDB0028971	Methionyl-Glutamine								MUMXFARPYQTTSL-UHFFFAOYSA-N	C10H19N3O4S	1	M+H	278.121		6.43	6.44	62.7027	4.99443	100	100	-0.436501	0.000296042	0.000824711	-0.347091	0.0276655	0.0729866	-0.661795	0.0205549	0.0702361	-0.214804	0.0777632	0.111788	-0.2209	0.000647518	0.00182574
PC 35:2	PC	RP_Pos, RP_NegMSMS_932, 1001, 593		Y	nonGL	PC 17:0_18:2 M+H Atlas --- PC 18:0_17:2 M+H Atlas, PC 35:2 M+Na Atlas --- PE 18:0_22:5 M+H Atlas --- PE 20:2_20:3 M+H Atlas, PC 17:0_18:2 M+HCOO Atlas	Lipids and lipid-like molecules	Glycerophospholipids	Glycerophosphoethanolamines	HMDB0009011	PE(18:0/22:5(7Z,10Z,13Z,16Z,19Z))	Glycerophospholipids [GP]	Glycerophosphocholines [GP01]	Diacylglycerophosphocholines [GP0101]	LMGP01011505 --- LMGP01011587, LMGP01011587, LMGP01011505	PC(17:0/18:2(9Z,12Z)) --- PC(18:0/17:2(9Z,12Z)), PC(18:0/17:2(9Z,12Z)), PC(17:0/18:2(9Z,12Z))	PC 35:2	PC 17:0_18:2 --- PC 17:2_18:0, PC 17:2_18:0, PC 17:0_18:2	QHSSPICKLMYIHE-RYKNKZFFNA-N, ZSKWZJYUVZYDQU-DYMXKLMANA-N, DOPWEOPNLIWONK-LTXDKZCQNA-N, GBTFQLZIZAVHPG-DYXXURTGNA-N, KYERVKWKQQBRQB-NIZIMQIGNA-N, QHSSPICKLMYIHE-RYKNKZFFNA-N, ZSKWZJYUVZYDQU-DYMXKLMANA-N	C43H82NO8P, C43H82NO8P, C45H80NO8P	1, 2	M+H, M+H --- M+Na, M+HCOO	772.5803, 794.5691, 816.5763	303.229	6.21	6.19	91.6667	3.56485	100	100	-0.442841	0.000294966	0.000824711	-0.476507	0.00255775	0.0111803	-0.596948	0.0400719	0.10807	-0.218591	0.07677	0.111131	-0.24196	0.000211355	0.000684861
CAR 18:2	CAR	RP_PosMSMS_263		Y	nonGL	CAR 18:2 M Atlas														C25H46NO4	1	M	424.341		2.56	2.56	62.6344	7.17487	84.2975	98.9796	-0.411277	0.00029811	0.00082661	-0.326896	0.0278068	0.0729866	-0.686219	0.0105856	0.043612	-0.0829928	0.472999	0.321264	-0.211446	0.000525712	0.00153631
Hydroxyurea	Carboximidic acids and derivatives	HILIC_PosMS1_285	RT_1		nonGL	Hydroxyurea 2M+H NIST	Organic acids and derivatives	Carboximidic acids and derivatives		HMDB0015140	Hydroxyurea								VSNHCAURESNICA-UHFFFAOYSA-N	CH4N2O2	1	2M+H	153.065		3.89	3.88	64.0541	5.80284	100	100	-0.440473	0.000304923	0.000841587	-0.337074	0.0346266	0.0853521	-0.302646	0.300741	0.380522	-0.320839	0.00843831	0.0261126	-0.201167	0.00227134	0.00532548
Lutein --- Zeaxanthin	Xenobiotics	RP_PosMS1_465	RT_1		nonGL	3'-Deoxycapsanthin; FAB-EBEB; MS2; m/z M MassBank --- Cryptocapsin; FAB-EBEB; MS2; m/z M MassBank --- DGTS 2:0_20:2 M+H Atlas --- DGTS 3:0_19:2 M+H Atlas --- DGTS 4:0_18:2 M+H Atlas --- DGTS 5:0_17:2 M+H Atlas --- DGTS 6:0_16:2 M+H Atlas --- Isozeaxanthin; FAB-EBEB; MS2; m/z M MassBank --- LDGCC 22:3 M+H Atlas --- Lutein; FAB-EBEB; MS2; m/z M MassBank --- Lycopene 1,2,1',2'-diepoxide; FAB-EBEB; M…	Lipids and lipid-like molecules	Prenol lipids	Tetraterpenoids	HMDB0002789, HMDB0003233	Zeaxanthin --- Lutein	Prenol Lipids [PR]	Isoprenoids [PR01]	C40 isoprenoids (tetraterpenes) [PR0107]	LMPR01070049 --- LMPR01070261 --- LMPR01070274 --- LMPR01070709 --- LMPR01070711 --- LMPR01070712 --- LMPR01070714 --- LMPR01070877 --- LMPR01070962	Beta-Carotene diepoxide --- Cryptocapsin --- Cryptoxanthin 5',6'-epoxide --- Cryptoxanthin 5,6-epoxide --- Lutein --- Luteochrome --- Semi-alpha-carotenone --- Semi-beta-carotenone --- Zeaxanthin			BIPAHAFBQLWRMC-DKLMTRRANA-N, CMOLUFWHADIFGS-VESOQFFVSA-N, DCWLOCNJVDYFMA-PAZCZHIKSA-N, GMJHZCBAXBEVTL-USJAUHPMNA-N, GYZWNQLEQAGWGD-DKLMTRRANA-N, HSOIPJLINDKQOV-FOTQGIOVSA-N, HTJLMVXKSJHXPR-XVTLYKPTNA-N, IEYAXVIVXCIGBX-QGLGPCELNA-N, ITZNDVRDABSNRE-VUWSZMCHSA-N, JKQXZKUSFCKOGQ-QAYBQHTQSA-N, JLFOTJPFBATTLK-IUXASYQSSA-N, JMZDCQZKLCHTFI-HPLZOGFXSA-N, KBPHJBAIARWVSC-RGZFRNHPSA-N, LLQCIZOXARRMDO-HGTNRAF…	C40H56O2	1	M --- M+H	568.424		4.12	4.1	63.4409	19.5487	92.562	100	0.434308	0.000309512	0.000850315	0.421198	0.00701607	0.0246002	0.909996	0.00120521	0.00851903	0.115132	0.346521	0.271227	0.246478	0.000119281	0.000408682
PE 36:4	PE	RP_Pos, RP_NegMSMS_830, 384		Y	nonGL	1,2-Dilinoleoyl-sn-glycero-3-phosphoethanolamine M+H NIST --- 1-Hexadecanoyl-2-(9Z-octadecenoyl)-sn-glycero-3-phosphoethanolamine M+Na NIST --- PE 16:0_20:4 M+H Atlas --- PE 18:2_18:2 M+H Atlas, 1-Hexadecanoyl-2-(5Z,8Z,11Z,14Z-eicosatetraenoyl)-sn-glycero-3-phosphoethanolamine M-H NIST --- LNAPE 18:2/N-18:2 M-H Atlas --- PE 16:0_20:4 M-H Atlas --- PE 18:2_18:2 M-H Atlas	Lipids and lipid-like molecules	Glycerophospholipids	Glycerophosphoethanolamines	HMDB0008927, HMDB0009093, HMDB0008937	PE(16:0/18:1(9Z)) --- PE(16:0/20:4(5Z,8Z,11Z,14Z)) --- PE(18:2(9Z,12Z)/18:2(9Z,12Z))	Glycerophospholipids [GP]	Glycerophosphoethanolamines [GP02]	Diacylglycerophosphoethanolamines [GP0201]	LMGP02010009 --- LMGP02010111, LMGP02010096	PE(16:0/18:1(9Z)) --- PE(18:2(9Z,12Z)/18:2(9Z,12Z)), PE(16:0/20:4(5Z,8Z,11Z,14Z))	PE 34:1 --- PE 36:4, PE 36:4	PE 16:0_18:1 --- PE 18:2_18:2, PE 16:0_20:4	FHQVHHIBKUMWTI-OTMQOFQLSA-N, NQIMLWFRWGTTOZ-JAXHXWBXNA-N, SSCDRSKJTAQNNB-DWEQTYCFSA-N, SSCDRSKJTAQNNB-MAZCIEHSNA-N, DRIVXEVMDWCWLI-CAQMIEAISA-N, NQIMLWFRWGTTOZ-JAXHXWBXNA-N, SSCDRSKJTAQNNB-MAZCIEHSNA-N, WXFAAOLVJRKSTM-MAZCIEHSNA-N	C39H76NO8P, C41H74NO8P, C41H74NO8P	1	M+H --- M+Na, M-H	740.5186, 738.509		5.84	5.84	98.1183	4.53074	100	100	-0.434818	0.000337243	0.000922251	-0.198307	0.214878	0.282343	-0.323522	0.26545	0.35773	-0.349774	0.0037152	0.0141174	-0.176323	0.00746085	0.0144881
CAR 20:4	CAR	RP_PosMSMS_296		Y	nonGL	CAR 20:4 M Atlas														C27H46NO4	1	M	448.341		2.54	2.53	56.7204	8.28416	99.1736	100	-0.413013	0.000350741	0.000954784	-0.227017	0.135239	0.210123	-0.386184	0.161931	0.272145	-0.248789	0.0320634	0.0618281	-0.178459	0.00435658	0.00941021
PC 34:2	PC	RP_Pos, RP_NegMSMS_884, 954, 556		Y	nonGL	1-Hexadecanoyl-2-octadecadienoyl-sn-glycero-3-phosphocholine M+H NIST --- 1-Palmitoyl-2-linoleoyl-sn-glycero-3-phosphocholine M+H NIST, 1-Hexadecanoyl-2-octadecadienoyl-sn-glycero-3-phosphocholine M+Na NIST --- PC 34:2 M+Na Atlas, PC 16:0_18:2 M+HCOO Atlas	Lipids and lipid-like molecules	Glycerophospholipids	Glycerophosphocholines	HMDB0007973, HMDB0258399	PC(16:0/18:2(9Z,12Z)) --- Soybean lecithin	Glycerophospholipids [GP]	Glycerophosphocholines [GP01]	Diacylglycerophosphocholines [GP0101]	LMGP01010594, LMGP01010589 --- LMGP01010728, LMGP01010592 --- LMGP01010594	PC(16:0/18:2(9Z,12Z)), PC(16:0/18:2(6Z,9Z)) --- PC(17:1(9Z)/17:1(9Z)), PC(16:0/18:2(9E,12E)) --- PC(16:0/18:2(9Z,12Z))	PC 34:2	PC 16:0_18:2, PC 16:0_18:2 --- PC 17:1/17:1	JLPULHDHAOZNQI-ZTIMHPMXSA-N, NVWYLRLKCCCUBZ-UOBGCCIWSA-N, NVWYLRLKCCCUBZ-UOBGCCIWSA-N, QQAGDZRFSLWFBO-GJLVVWLQNA-N, RXPVDHQFHIMZPN-AUYXYSRINA-N, JLPULHDHAOZNQI-AKMCNLDWNA-N	C42H80NO8P	2, 1	M+H, M+Na, M+HCOO	758.564, 780.5469, 802.5612	184.0722, 462.2915	5.91	5.9	100	2.98969	100	100	-0.427044	0.000412483	0.00111775	-0.439546	0.00494025	0.019054	-0.634967	0.0265575	0.0813043	-0.297974	0.0136689	0.0347489	-0.232984	0.000307166	0.000953751
Citrulline	Amino acids, peptides, and analogues	HILIC_Neg, HILIC_PosMSMS_220, 315, 409			nonGL	Citrulline M-H HMDB, L-Citrulline M+H-NH3 NIST, Citrulline M+H FiehnHILIC --- Citrulline M+H HMDB --- Citrulline; LC-ESI-QTOF; MS2; CE M+H MassBank --- D-Citrulline M+H HMDB --- L-Citrulline M+H NIST	Organic acids and derivatives	Carboxylic acids and derivatives	Amino acids, peptides, and analogues	HMDB0000904, HMDB0250742	Citrulline --- D-Citrulline								RHGKLRLOHDJJDR-BYPYZUCNSA-N, RHGKLRLOHDJJDR-BYPYZUCNSA-N, RHGKLRLOHDJJDR-UHFFFAOYNA-N, RHGKLRLOHDJJDR-UHFFFAOYSA-N	C6H13N3O3	2, 1	M-H, M+H-NH3, M+H	174.0881, 159.0761, 176.1028	131.08	14.82	14.81	66.3957	10.0289	92.3729	100	0.420354	0.00042299	0.00113637	0.253834	0.104839	0.177761	0.424473	0.135648	0.245113	0.171841	0.153962	0.165519	0.187298	0.00367372	0.00817212
PE 40:7	PE	RP_Pos, RP_NegMSMS_985, 509		Y	nonGL	PE 18:1_22:6 M+H Atlas, PE 18:1_22:6 M-H Atlas	Lipids and lipid-like molecules	Glycerophospholipids	Glycerophosphoethanolamines	HMDB0009078	PE(18:1(9Z)/22:6(4Z,7Z,10Z,13Z,16Z,19Z))	Glycerophospholipids [GP]	Glycerophosphoethanolamines [GP02]	Diacylglycerophosphoethanolamines [GP0201]	LMGP02011264	PE(18:1(9Z)/22:6(4Z,7Z,10Z,13Z,16Z,19Z))	PE 40:7	PE 18:1_22:6	JZSZAGWWWKKXLO-HILQMKNTNA-N	C45H76NO8P	1, 2	M+H, M-H	790.5344, 788.5242	281.248	5.82	5.81	82.2581	7.53954	100	100	-0.408761	0.000423164	0.00113637	-0.299767	0.0480709	0.104367	-0.647975	0.0180336	0.0635269	-0.255562	0.0279672	0.0559312	-0.203933	0.00106277	0.00275471
PIP2(16:0/16:0)	Other lipids	HILIC_NegMS1_1056		Y	nonGL	PtdIns-(3,4)-P2 (1,2-dipalmitoyl) M-2H NIST --- PtdIns-(4,5)-P2 (1,2-dipalmitoyl) M-2H NIST	Lipids and lipid-like molecules	Glycerophospholipids	Glycerophosphoinositol phosphates	HMDB0010032	PIP2(16:0/16:0)								HKWJHKSHEWVOSS-CFLDSDIDSA-N, HKWJHKSHEWVOSS-LVPNONNASA-N	C41H81O19P3	1	M-2H	484.22		7.26	7.25	46.8835	25.7988	92.3729	100	-0.430367	0.000429576	0.00114841	-0.47599	0.00250803	0.0111111	-0.396705	0.174085	0.281419	-0.242639	0.04832	0.0826859	-0.227647	0.00050051	0.0014845
O-Phosphoethanolamine	Other organic acids and derivatives	HILIC_NegMS1_90	RT_2		nonGL	O-Phosphocolamine M-H FiehnHILIC --- O-Phosphoethanolamine M-H HMDB --- O-Phosphoethanolamine; LC-ESI-QTOF; MS2; CE M-H MassBank	Organic acids and derivatives	Organic phosphoric acids and derivatives	Phosphate esters	HMDB0000224	O-Phosphoethanolamine								SUHOOTKUPISOBE-UHFFFAOYSA-N	C2H8NO4P	1	M-H	140.012		15.25	15.24	21.6802	22.4926	66.9492	100	0.422095	0.000443014	0.00117905	0.188065	0.234578	0.296044	0.523407	0.0668989	0.155091	0.223227	0.0649515	0.0987237	0.181526	0.0052788	0.0110421
His-Pro	Amino acids, peptides, and analogues	HILIC_PosMSMS_627			nonGL	His-Pro M+H-H2O NIST	Organic acids and derivatives	Carboxylic acids and derivatives	Amino acids, peptides, and analogues	HMDB0304781	Histidinyl-Proline								LNCFUHAPNTYMJB-UHFFFAOYSA-N	C11H16N4O3	1	M+H-H2O	235.119		11.15	11.56	86.2162	5.07271	100	100	-0.422685	0.000448991	0.00118965	-0.339794	0.0305724	0.0770978	-0.0950371	0.742255	0.579582	-0.125263	0.304739	0.249775	-0.18551	0.00441822	0.00950889
2-Hydroxyphenethylamine	Amines	HILIC_PosMSMS_121			nonGL	2-Amino-1-phenylethanol M+H-H2O NIST	Organic nitrogen compounds	Organonitrogen compounds	Amines	HMDB0001065	2-Hydroxyphenethylamine								ULSIYEODSMZIPX-UHFFFAOYSA-N	C8H11NO	1	M+H-H2O	120.081		10.18	10.19	100	2.91885	100	100	-0.413141	0.000504172	0.00132294	-0.145389	0.353004	0.37092	-0.582842	0.038356	0.105802	-0.181011	0.131004	0.152684	-0.174644	0.0066553	0.0132254
Caffeic acid --- M-toluic Acid --- Phenylacetic acid	Benzenoids --- Phenylpropanoids and polyketides	HILIC_NegMS1_81	RT_2		nonGL	2-Methylbenzoic acid M-H HMDB --- 2-Methylbenzoic acid M-H NIST --- Caffeic acid; LC-ESI-QTOF; MS2; CE M-H-CO2 MassBank --- M-toluic Acid M-H HMDB --- Phenylacetic acid M-H HMDB	Benzenoids --- Phenylpropanoids and polyketides --- NA	Benzene and substituted derivatives --- Cinnamic acids and derivatives --- NA	NA --- Hydroxycinnamic acids and derivatives	HMDB0000209, HMDB0003501, HMDB0062810	Phenylacetic acid --- cis-Caffeic acid --- M-toluic Acid								GPSDUZXPYCFOSQ-UHFFFAOYSA-N, QAIPRVGONGVQAS-RQOWECAXSA-N, WLJVXDMOQOGPHL-UHFFFAOYSA-N, ZWLPBLYKEWSWPD-UHFFFAOYSA-N	C8H8O2, C9H8O4	1	M-H --- M-H-CO2	135.045		7	7.02	81.8428	13.7713	77.9661	100	0.417847	0.000505954	0.00132294	0.241243	0.126065	0.200624	0.547173	0.0550366	0.134511	0.308628	0.00997042	0.0282874	0.190903	0.00325236	0.00731671
TAG 58:10	TAG	RP_PosMSMS_1432, 1441		Y	GL	TG 16:0_20:4_22:6 M+NH4 Atlas --- TG 18:1_18:3_22:6 M+NH4 Atlas --- TG 18:2_18:2_22:6 M+NH4 Atlas --- TG 18:2_20:4_20:4 M+NH4 Atlas, TG 16:0_20:4_22:6 M+Na Atlas --- TG 18:1_20:4_20:5 M+Na Atlas --- TG 18:2_18:2_22:6 M+Na Atlas --- TG 18:2_20:4_20:4 M+Na Atlas	Lipids and lipid-like molecules	Glycerolipids	Triradylcglycerols	HMDB0044555, HMDB0050179, HMDB0052781, HMDB0010496, HMDB0050217	TG(18:2(9Z,12Z)/18:2(9Z,12Z)/22:6(4Z,7Z,10Z,13Z,16Z,19Z)) --- TG(16:0/20:4(8Z,11Z,14Z,17Z)/22:6(4Z,7Z,10Z,13Z,16Z,19Z)) --- TG(18:1(9Z)/18:3(9Z,12Z,15Z)/22:6(4Z,7Z,10Z,13Z,16Z,19Z)) --- TG(18:1(9Z)/20:4(8Z,11Z,14Z,17Z)/20:5(5Z,8Z,11Z,14Z,17Z)) --- TG(18:2(9Z,12Z)/20:4(8Z,11Z,14Z,17Z)/20:4(8Z,11Z,14Z,17Z))	Glycerolipids [GL]	Triradylglycerols [GL03]	Triacylglycerols [GL0301]	LMGL03011543 --- LMGL03011544, LMGL03011544	TG(18:1(9Z)/18:3(9Z,12Z,15Z)/22:6(4Z,7Z,10Z,13Z,16Z,19Z))[iso6] --- TG(18:2(9Z,12Z)/18:2(9Z,12Z)/22:6(4Z,7Z,10Z,13Z,16Z,19Z))[iso3], TG(18:2(9Z,12Z)/18:2(9Z,12Z)/22:6(4Z,7Z,10Z,13Z,16Z,19Z))[iso3]	TG 58:10	TG 18:1_18:3_22:6 --- TG 18:2_18:2_22:6, TG 18:2_18:2_22:6	AHSZOTPDQMNZHG-UUYLMGCANA-N, BHTDMDDGPQHTNH-DAPPMKOPNA-N, HCEQQESIFLFUPF-BZCFYLIVNA-N, YNVHIDISXOPRLL-HQQFMMERNA-N, BHTDMDDGPQHTNH-DAPPMKOPNA-N, HCEQQESIFLFUPF-BZCFYLIVNA-N, KHNMVUXCIUHLCK-SNMYQICYNA-N, YNVHIDISXOPRLL-HQQFMMERNA-N	C61H98O6	2, 1	M+NH4, M+Na	944.763, 949.72	599.497	10.25	10.21	77.6882	7.94721	95.0413	100	-0.422262	0.000502897	0.00132294	-0.302519	0.0566316	0.116036	-0.824925	0.00370641	0.0186872	-0.20403	0.0952945	0.124361	-0.217692	0.000820277	0.00223295
2',2'-Difluoro-2'-deoxyuridine	Pyrimidine nucleosides	HILIC_NegMS1_468			nonGL	2',2'-Difluoro-2'-deoxyuridine; LC-ESI-ITFT; MS2; CE M-H MassBank	Nucleosides, nucleotides, and analogues	Pyrimidine nucleosides	Pyrimidine 2'-deoxyribonucleosides	HMDB0060727	2',2'-Difluorodeoxyuridine								FIRDBEQIJQERSE-QPPQHZFASA-N	C9H10F2N2O5	1	M-H	263.044		10.85	10.86	90.2439	22.477	100	100	-0.426338	0.000516273	0.00134402	-0.255139	0.113156	0.185947	-0.30717	0.295406	0.378302	-0.165473	0.182337	0.184402	-0.182996	0.00591745	0.0119991
Hydroxyphenyllactic acid	Phenylpropanoids and polyketides	HILIC_NegMSMS_245			nonGL	Hydroxyphenyllactic acid M-H HMDB --- p-Hydroxyphenyllactic acid M-H NIST	Phenylpropanoids and polyketides	Phenylpropanoic acids		HMDB0000755	Hydroxyphenyllactic acid								JVGVDSSUAVXRDY-UHFFFAOYSA-N	C9H10O4	1	M-H	181.05		7.01	7.02	87.2629	6.08341	61.0169	100	0.419749	0.000522774	0.00135503	0.266838	0.0924075	0.165627	0.405257	0.16021	0.271756	0.310578	0.0100169	0.0282874	0.188384	0.0039628	0.00868552
PE O-38:6	PE-O	RP_Pos, RP_NegMSMS_861, 416		Y	nonGL	PE O-18:2_20:4 M+H Atlas, PE O-18:2_20:4 M-H Atlas													QGMRGDWLZOYPFY-YUPWHRRNNA-N	C43H76NO7P	2	M+H, M-H	750.5399, 748.5292	361.2725, 329.2472	6.29	6.275	69.6237	5.44001	100	100	-0.406557	0.000538221	0.00138903	-0.318126	0.0379209	0.0897604	-0.445843	0.110853	0.212268	0.0464803	0.696663	0.383928	-0.195766	0.00196277	0.00473736
TAG 60:13	TAG	RP_PosMSMS_1483		Y	GL	TG 18:2_20:5_22:6 M+Na Atlas --- TG 20:4_20:4_20:5 M+Na Atlas	Lipids and lipid-like molecules	Glycerolipids	Triradylcglycerols	HMDB0052799, HMDB0055662	TG(18:2(9Z,12Z)/20:5(5Z,8Z,11Z,14Z,17Z)/22:6(4Z,7Z,10Z,13Z,16Z,19Z)) --- TG(20:4(8Z,11Z,14Z,17Z)/20:4(8Z,11Z,14Z,17Z)/20:5(5Z,8Z,11Z,14Z,17Z))	Glycerolipids [GL]	Triradylglycerols [GL03]	Triacylglycerols [GL0301]	LMGL03012093	TG(18:2(9Z,12Z)/20:5(5Z,8Z,11Z,14Z,17Z)/22:6(4Z,7Z,10Z,13Z,16Z,19Z))[iso6]	TG 60:13	TG 18:2_20:5_22:6	GKGVYCDLFAHWTQ-WBRURSTNNA-N, WXFBMZFHVGMSBL-CWBUQHRONA-N	C63H96O6	1	M+Na	971.705		9.84	9.76	70.6989	5.08373	95.0413	100	-0.41548	0.000546981	0.00140555	-0.290038	0.0650551	0.128092	-0.912204	0.00110602	0.00818548	-0.236016	0.0505814	0.085982	-0.218209	0.000696967	0.00193258
LPE 18:2	LPE	RP_NegMSMS_119		Y	nonGL	LPE 18:2 M-H Atlas	Lipids and lipid-like molecules	Glycerophospholipids	Glycerophosphoethanolamines	HMDB0011507	LysoPE(18:2(9Z,12Z)/0:0)	Glycerophospholipids [GP]	Glycerophosphoethanolamines [GP02]	Monoacylglycerophosphoethanolamines [GP0205]	LMGP02050011	PE(18:2(9Z,12Z)/0:0)	LPE 18:2	LPE 18:2	DBHKHNGBVGWQJE-HZJYTTRNNA-N	C23H44NO7P	2	M-H	476.278	279.226	2.57	2.56	74.6631	5.9752	87.5	100	-0.377268	0.000583806	0.00149374	-0.362124	0.0108719	0.0347725	-0.417336	0.109858	0.211217	-0.307717	0.00470023	0.0167518	-0.193592	0.000998191	0.0026331
2,3-Diaminopropionic acid	Amino acids, peptides, and analogues	HILIC_Pos, HILIC_NegMS1_68, 18			nonGL	2,3-Diaminopropionic acid M+H HMDB --- DL-2,3-Diaminopropionic acid M+H NIST, 2,3-Diaminopropionic acid M-H HMDB --- DL-2,3-Diaminopropionic acid M-H NIST	Organic acids and derivatives	Carboxylic acids and derivatives	Amino acids, peptides, and analogues	HMDB0002006	2,3-Diaminopropionic acid	Fatty Acyls [FA]	Fatty Acids and Conjugates [FA01]	Amino fatty acids [FA0110]	LMFA01100051	2,3-diamino-propionic acid			PECYZEOJVXMISF-REOHCLBHSA-N, PECYZEOJVXMISF-UHFFFAOYSA-N	C3H8N2O2	1	M+H, M-H	105.0693, 103.0554		10.185	10.19	80.4878	8.54768	94.958	100	-0.415727	0.000610154	0.00155448	-0.177602	0.265656	0.314786	-0.462916	0.108662	0.210038	-0.206828	0.0902758	0.121177	-0.174651	0.0078765	0.0150021
LNAPE N-37:2	LNAPE	RP_NegMSMS_430		Y	nonGL	LNAPE 18:2/N-19:0 M-H Atlas													UCMCRSUZJUVXPT-MLWYYCKJNA-N	C42H80NO8P	2	M-H	756.555	269.246	5.97	6.16	25.0674	5.61043	59.1667	100	-0.415437	0.000634479	0.00160958	-0.556922	0.000318337	0.00210832	-0.809722	0.0044557	0.0218537	-0.281134	0.0206847	0.045878	-0.259551	5.25276e-05	0.000195718
PC 38:5	PC	RP_Pos, RP_NegMSMS_1047, 1119, 671		Y	nonGL	1,2-Di-(9Z-octadecenoyl)-sn-glycero-3-phosphocholine M+Na NIST --- PC 16:0_22:5 M+H Atlas --- PC 18:1_20:4 M+H Atlas, PC 38:5 M+Na Atlas, PC 16:0_22:5 M+HCOO Atlas --- PC 18:1_20:4 M+HCOO Atlas	Lipids and lipid-like molecules	Glycerophospholipids	Glycerophosphocholines	HMDB0000593, HMDB0008115, HMDB0007990	PC(18:1(9Z)/18:1(9Z)) --- PC(16:0/22:5(7Z,10Z,13Z,16Z,19Z)) --- PC(18:1(9Z)/20:4(8Z,11Z,14Z,17Z))	Glycerophospholipids [GP]	Glycerophosphocholines [GP01]	Diacylglycerophosphocholines [GP0101]	LMGP01010647 --- LMGP01010876 --- LMGP01010890 --- LMGP01012165, LMGP01010647 --- LMGP01012165	PC(16:0/22:5(7Z,10Z,13Z,16Z,19Z)) --- PC(18:1(9E)/18:1(9E)) --- PC(18:1(9Z)/18:1(9Z)) --- PC(18:1(9Z)/20:4(8Z,11Z,14Z,17Z)), PC(16:0/22:5(7Z,10Z,13Z,16Z,19Z)) --- PC(18:1(9Z)/20:4(8Z,11Z,14Z,17Z))	PC 36:2 --- PC 38:5, PC 38:5	PC 16:0_22:5 --- PC 18:1/18:1 --- PC 18:1_20:4, PC 16:0_22:5 --- PC 18:1_20:4	ARDJUHDXABDVFH-BPFCGSCHNA-N, SNKAWJBJQDLSFF-YEUCEMRASA-N, SWOKEJBWARJLGN-LTLPGSJDNA-N, NXXPLRWFTSQYFC-NREKDWIXNA-N, ARDJUHDXABDVFH-BPFCGSCHNA-N, SWOKEJBWARJLGN-LTLPGSJDNA-N	C44H84NO8P, C46H82NO8P, C46H82NO8P	1, 2	M+H --- M+Na, M+Na, M+HCOO	808.5781, 830.561, 852.574	329.247	5.92	5.9	91.3978	2.56783	99.1736	100	-0.397458	0.000654544	0.00165345	-0.467402	0.00179371	0.00836428	-0.828313	0.00233571	0.0130544	-0.293326	0.0115813	0.0309542	-0.239699	0.000104163	0.000369631
ST 24:1;O3;T	ST - Steroid conjugates	HILIC_Pos, HILIC_NegMS1_1646, 1054		Y	nonGL	Lithocholyltaurine M+H HMDB, LPC O-13:1 M+HCOO Atlas --- Lithocholyltaurine M-H HMDB --- SL 10:0;O/16:4 M-H Atlas --- SL 10:1;O/16:3 M-H Atlas --- ST 24:1;O2;T M-H Atlas	Lipids and lipid-like molecules	Steroids and steroid derivatives	Bile acids, alcohols and derivatives	HMDB0000722	Lithocholyltaurine	Sterols [ST]	Steroid conjugates [ST05]	Taurine conjugates [ST0504]	LMST05040003	Taurolithocholic acid	ST 24:1;O3;T		QBYUNVOYXHFVKC-GBURMNQMSA-N, AYVMIQPDRGSKMW-GTGWAOFVNA-N, QBYUNVOYXHFVKC-GBURMNQMSA-N, YOJDHFGTOIRORN-FPLPWBNLNA-N, ZZMBEPXUIWUEBK-PFRBBRRHNA-N	C26H45NO5S	1	M+H, M+HCOO --- M-H	484.3118, 482.2961		10.825	10.815	63.6856	3.96906	99.1597	100	-0.409609	0.000674053	0.00169554	-0.416408	0.00750294	0.0260289	-0.630854	0.0266133	0.0813043	-0.247995	0.039972	0.0717995	-0.223722	0.000505159	0.00149087
PyroGlu-Met	Amino acids, peptides, and analogues	HILIC_PosMSMS_748			nonGL	PyroGlu-Met M+H NIST	Organic acids and derivatives	Carboxylic acids and derivatives	Amino acids, peptides, and analogues										FKWGLFXEKQAERS-UHFFFAOYSA-N	C10H16N2O4S	1	M+H	261.09		6.58	6.58	14.8649	5.71924	46.2185	100	-0.410018	0.000699106	0.00175117	-0.433286	0.00550372	0.0208591	-0.684952	0.0162109	0.0587329	-0.236862	0.0509117	0.085982	-0.229678	0.000366374	0.00112586
CE 18:2	CE	RP_PosMS1_641		Y	nonGL	CE 18:2 M+Na Atlas	Lipids and lipid-like molecules	Steroids and steroid derivatives	Steroid esters	HMDB0000610, HMDB0247126	CE(18:2(9Z,12Z)) --- Cholest-5-en-3-ol (3beta)-, (9Z,12Z)-9,12-octadecadienoate	Sterols [ST]	Sterols [ST01]	Cholesteryl esters [ST0102]	LMST01020008	18:2 Cholesterol ester	CE 18:2		NAACPBBQTFFYQB-HDXUUTQWNA-N	C45H76O2	1	M+Na	671.569		11	10.95	92.4731	17.397	79.3388	100	-0.403091	0.000709476	0.00176971	-0.340605	0.0278561	0.0729866	-0.327354	0.249008	0.346585	-0.284731	0.0165052	0.0394892	-0.192413	0.00268356	0.00617695
3-Indolebutyric acid	Indoles and derivatives	HILIC_PosMS1_439	RT_1		nonGL	3-Hydroxydiphenylamine M+H NIST --- 4-(Phenylamino)phenol M+H NIST --- Indole-3-butyric acid M+H-H2O NIST	Organoheterocyclic compounds	Indoles and derivatives	Indoles	HMDB0002096	3-Indolebutyric acid								JTEDVYBZBROSJT-UHFFFAOYSA-N, JTTMYKSFKOOQLP-UHFFFAOYSA-N, NDACNGSDAFKTGE-UHFFFAOYSA-N	C12H11NO, C12H13NO2	1	M+H --- M+H-H2O	186.095		2.57	2.57	64.0541	13.7242	100	100	-0.412296	0.000714743	0.00177542	-0.340783	0.0316519	0.0792108	-0.529925	0.0666515	0.155015	-0.179898	0.142891	0.159836	-0.205856	0.00165571	0.00409571
FA 20:6;O2	Amino acids, peptides, and analogues	HILIC_NegMS1_630			nonGL	9-Oxo-15S-hydroxy-5Z,10Z,13E,17Z-prostatetraenoic acid M-H-H2O NIST --- 9-Oxo-15S-hydroxy-5Z,8(12),13E,17Z-prostatetraenoic acid M-H-H2O NIST --- Loxistatin acid M-H NIST	Organic acids and derivatives	Carboxylic acids and derivatives	Amino acids, peptides, and analogues	HMDB0247379	N-(N-(3-Carboxyoxirane-2-carbonyl)leucyl)isoamylamine	Fatty Acyls [FA]	Eicosanoids [FA03]	Prostaglandins [FA0301]	LMFA03010140 --- LMFA03010141	PGA3 --- PGB3	FA 20:6;O2		DQRGQQAJYRBDRP-WIYNMSIDSA-N, KSIRMUMXJFWKAC-AWXJZKABSA-N, SCMSYZJDIQPSDI-UNXYVOJBSA-N	C15H26N2O5, C20H28O4	1	M-H --- M-H-H2O	313.179		1.65	1.69	91.5989	10.3203	73.7288	100	-0.411198	0.000728495	0.00180207	-0.422729	0.00717724	0.0250314	-0.382374	0.187217	0.29601	-0.292037	0.0161273	0.0387646	-0.212062	0.00115075	0.00295703
3-Phenoxypropionic acid --- Tropate	Xenobiotics	HILIC_PosMSMS_254			nonGL	3-Phenoxypropionic acid M+H-H2O NIST --- Tropic acid M+H-H2O NIST	Benzenoids --- Organic acids and derivatives	Benzene and substituted derivatives --- Hydroxy acids and derivatives	3-phenoxypropionic acids --- Beta hydroxy acids and derivatives	HMDB0002229, HMDB0062590	3-Phenoxypropionic acid --- Tropate								BUSOTUQRURCMCM-UHFFFAOYSA-N, JACRWUWPXAESPB-UHFFFAOYSA-N	C9H10O3	1	M+H-H2O	149.059		10.18	10.19	100	22.7467	100	100	-0.397756	0.000779238	0.00191963	-0.0776499	0.618526	0.482144	-0.614022	0.0279948	0.0830612	-0.148073	0.215116	0.204731	-0.160024	0.0126953	0.0220653
TAG 58:9	TAG	RP_PosMSMS_1437, 1445		Y	GL	TG 18:1_18:2_22:6 M+NH4 Atlas --- TG 18:1_20:4_20:4 M+NH4 Atlas, TG 18:1_18:2_22:6 M+Na Atlas --- TG 18:1_20:4_20:4 M+Na Atlas	Lipids and lipid-like molecules	Glycerolipids	Triradylcglycerols	HMDB0050019, HMDB0050216	TG(18:1(9Z)/18:2(9Z,12Z)/22:6(4Z,7Z,10Z,13Z,16Z,19Z)) --- TG(18:1(9Z)/20:4(8Z,11Z,14Z,17Z)/20:4(8Z,11Z,14Z,17Z))	Glycerolipids [GL]	Triradylglycerols [GL03]	Triacylglycerols [GL0301]	LMGL03011467	TG(18:1(9Z)/18:2(9Z,12Z)/22:6(4Z,7Z,10Z,13Z,16Z,19Z))[iso6]	TG 58:9	TG 18:1_18:2_22:6	DFNHWVOJZBVVQC-UUKDXEAZNA-N, RLAPDVQGJNAHOC-IPTWROKLNA-N	C61H100O6	1	M+NH4, M+Na	946.7792, 951.7355		10.445	10.44	80.1075	4.20695	85.124	100	-0.40588	0.000811057	0.00198979	-0.277351	0.0798437	0.149568	-0.783942	0.00573445	0.027012	-0.209821	0.0848726	0.116034	-0.206413	0.00149833	0.00376897
PE O-40:8	PE-O	RP_NegMSMS_470		Y	nonGL	PE O-18:2_22:6 M-H Atlas													VVEHXBSUSFPSAC-OJMLKDQNNA-N	C45H76NO7P	2	M-H	772.529	327.233	6.12	6.1	62.2642	13.6855	85	100	-0.396621	0.000823855	0.00201291	-0.323248	0.0362244	0.0879678	-0.637713	0.0225333	0.0736577	-0.143347	0.230931	0.210852	-0.204034	0.00132841	0.00338438
His-His	Amino acids, peptides, and analogues	HILIC_PosMS1_933			nonGL	His-His M+H NIST	Organic acids and derivatives	Carboxylic acids and derivatives	Amino acids, peptides, and analogues	HMDB0028887	Histidylhistidine								SGCGMORCWLEJNZ-UHFFFAOYSA-N	C12H16N6O3	1	M+H	293.132		8.27	8.28	63.5135	16.1486	98.3193	100	-0.396018	0.000844387	0.00205465	-0.288191	0.0626534	0.124485	-0.33403	0.237372	0.335943	-0.295927	0.012198	0.0316772	-0.181553	0.00455472	0.00966314
PC 24:0	PC	RP_PosMSMS_541		Y	nonGL	PC 12:0_12:0 M+H Atlas	Lipids and lipid-like molecules	Glycerophospholipids	Glycerophosphocholines	HMDB0244809	1,2-Dilauroyl-sn-glycero-3-phosphocholine	Glycerophospholipids [GP]	Glycerophosphocholines [GP01]	Diacylglycerophosphocholines [GP0101]	LMGP01010429	PC(12:0/12:0)	PC 24:0	PC 12:0_12:0	IJFVSSZAOYLHEE-UHFFFAOYNA-N	C32H64NO8P	1	M+H	622.441		4.04	4.04	32.2581	12.125	99.1736	100	-0.397139	0.000916937	0.00222212	-0.283115	0.0701473	0.136885	-0.62379	0.0272548	0.0822191	-0.254306	0.0337354	0.0636278	-0.196402	0.00227791	0.00532548
Biocytin	Amino acids, peptides, and analogues	HILIC_PosMS1_1373	RT_2		nonGL	Biocytin M+Na NIST	Organic acids and derivatives	Carboxylic acids and derivatives	Amino acids, peptides, and analogues	HMDB0003134	Biocytin								BAQMYDQNMFBZNA-ATWGWHJKSA-N	C16H28N4O4S	1	M+Na	395.176		5.02	5.04	64.0541	18.5617	100	100	-0.402944	0.000927851	0.00223946	-0.331074	0.0364599	0.087991	-0.523617	0.0692555	0.158013	-0.286796	0.0180289	0.0419689	-0.201143	0.00208001	0.00498
Pyridoxine	Vitamins and cofactors	HILIC_Pos, HILIC_NegMSMS_370, 197			nonGL	Pyridoxine M+H HMDB --- Pyridoxine M+H NIST, Pyridoxine M-H HMDB	Organoheterocyclic compounds	Pyridines and derivatives	Pyridoxines	HMDB0000239	Pyridoxine								LXNHXLLTXMVWPM-UHFFFAOYSA-N	C8H11NO3	1, 2	M+H, M-H	170.081, 168.0668	121.052	10.41	10.36	64.0541	5.05659	100	100	-0.401648	0.000959238	0.00230588	-0.270179	0.0889752	0.161156	-0.332401	0.251188	0.347969	-0.22832	0.0610978	0.0958301	-0.179917	0.00614298	0.0123723
FAHFA 18:0/20:2	FAHFA	RP_NegMSMS_202		Y	nonGL	FAHFA 18:0/20:2 M-H Atlas													HPRZTBFQSJGUBH-GNPIQOGONA-N	C38H70O4	2	M-H	589.518	283.263	4.18	4.17	92.4528	6.84878	87.5	100	-0.397187	0.000984336	0.00234729	-0.320746	0.0408448	0.0936389	-0.575326	0.0433789	0.112753	-0.219468	0.0694382	0.103056	-0.200437	0.00194383	0.0047107
PE-Cer 36:1;O2	PE-Cer	RP_NegMSMS_306		Y	nonGL	PE-Cer 18:1;2O/18:0 M-H Atlas --- PE-Cer 24:1;2O/12:0 M-H Atlas													ODXAYQMCAAQOSY-OWWNRXNENA-N, PKXDUSIGJUEIOS-OWWNRXNENA-N	C38H77N2O6P	2	M-H	687.545	140.01	6.15	6.13	21.5633	13.6526	66.6667	100	-0.398499	0.000981072	0.00234729	-0.493753	0.00141133	0.00690574	-0.708093	0.0126407	0.0495312	-0.161845	0.183841	0.185414	-0.238221	0.000203193	0.000665581
4-Aminohippuric acid	Benzenoids	HILIC_PosMS1_473	RT_1		nonGL	2-[(4-Aminobenzoyl)amino]acetic acid M+H NIST --- 4-Aminohippuric acid M+H HMDB --- Anthrone M+H HMDB	Benzenoids	Benzene and substituted derivatives	Benzoic acids and derivatives	HMDB0001867	4-Aminohippuric acid								HSMNQINEKMPTIC-UHFFFAOYSA-N, RJGDLRCDCYRQOQ-UHFFFAOYSA-N	C14H10O, C9H10N2O3	1	M+H	195.077		2.99	3	88.3784	5.8542	100	100	-0.401775	0.00100271	0.00238158	-0.238697	0.135166	0.210123	-0.12128	0.677636	0.555872	-0.359782	0.00283625	0.0116762	-0.163197	0.013668	0.0234821
TAG 59:13	TAG	RP_PosMS1_1447		Y	GL	TG 11:0_16:4_32:9 M+NH4 Atlas --- TG 11:0_18:5_30:8 M+NH4 Atlas --- TG 11:0_22:6_26:7 M+NH4 Atlas --- TG 13:1_16:4_30:8 M+NH4 Atlas --- TG 13:1_18:5_28:7 M+NH4 Atlas --- TG 13:1_20:5_26:7 M+NH4 Atlas --- TG 13:1_22:6_24:6 M+NH4 Atlas --- TG 15:1_18:5_26:7 M+NH4 Atlas --- TG 15:1_22:6_22:6 M+NH4 Atlas --- TG 16:4_17:2_26:7 M+NH4 Atlas --- TG 17:2_18:5_24:6 M+NH4 Atlas --- TG 17:2_20:5_22:6 M+NH4 A…						Glycerolipids [GL]	Triradylglycerols [GL03]	Triacylglycerols [GL0301]	LMGL03011903 --- LMGL03012980	TG(15:1(9Z)/22:6(4Z,7Z,10Z,13Z,16Z,19Z)/22:6(4Z,7Z,10Z,13Z,16Z,19Z))[iso3] --- TG(17:2(9Z,12Z)/20:5(5Z,8Z,11Z,14Z,17Z)/22:6(4Z,7Z,10Z,13Z,16Z,19Z))[iso6]	TG 59:13	TG 15:1_22:6_22:6 --- TG 17:2_20:5_22:6	BPXXCPBDSLGCBP-FHJHIZFCNA-N, DWAQBUTVLKHYPL-XAHXZNQBNA-N, HEUOKBCCXKKKLB-VZIUNTDVNA-N, HODYKYMOSPIHTB-HLDBDEAVNA-N, INCXFCXIFFAIBL-VUYDXQDYNA-N, JNTBUWGXIQLTSU-HLBOMBALNA-N, JUYSOMKDXLOISI-PNGSVLQDNA-N, KILHORCCCVNHHT-TUTZORJGNA-N, LBQOZUMXFPONBM-FSOPPLPKNA-N, LFDBCVSMZASAOZ-AHNDINEPNA-N, MWAZALVFCDMWDO-PQZCCEINNA-N, ROPPJPIIEVWTBR-ILWHCRBLNA-N, RYGGANBUQRUAKD-FNMFTVHRNA-N, SWQCSLXDEHVREA-CBZVIUO…	C62H94O6	1	M+NH4	952.739		10.44	10.44	69.8925	5.05138	100	100	-0.391406	0.00101315	0.00239683	-0.267544	0.0852342	0.156105	-0.495771	0.078853	0.171758	-0.0099107	0.934464	0.449481	-0.18522	0.00386748	0.0085394
LPC 18:2	LPC	RP_Pos, RP_NegMSMS_391, 424, 179		Y	nonGL	LPC 18:2-SN1 M+H Atlas --- PC O-18:2 M+H Atlas, LPC 18:2 M+Na Atlas, LPC 18:2 M+HCOO Atlas	Lipids and lipid-like molecules	Glycerophospholipids	Glycerophosphocholines	HMDB0010386	LysoPC(18:2(9Z,12Z)/0:0)	Glycerophospholipids [GP]	Glycerophosphocholines [GP01]	Monoacylglycerophosphocholines [GP0105]	LMGP01050035	PC(18:2(9Z,12Z)/0:0)	LPC 18:2	LPC 18:2	JVDZMIANQJZKTI-MURFETPANA-N, SPJFYYJXNPEZDW-UTJQPWESNA-N, SPJFYYJXNPEZDW-UTJQPWESNA-N	C26H50NO7P	2, 1	M+H, M+Na, M+HCOO	520.3378, 542.3198, 564.3308	184.0731, 224.0643	2.6	2.59	68.5484	4.89757	100	100	-0.369774	0.00110967	0.00261479	-0.388608	0.00787583	0.0270762	-0.588462	0.0276137	0.0826104	-0.363448	0.00109254	0.00607107	-0.2052	0.000692082	0.001928
NAE 18:4	NAE	RP_PosMS1_31		Y	nonGL	NAE 18:4 M+H Atlas						Fatty Acyls [FA]	Fatty amides [FA08]	N-acyl ethanolamides (endocannabinoids) [FA0804]	LMFA08040006	Anandamide (18:4, n-3)	NAE 18:4		BSEHZAIYCIVZNE-LTKCOYKYSA-N	C20H33NO2	1	M+H	320.255		2.19	2.17	34.4086	14.2128	99.1736	100	-0.390534	0.00121061	0.00284141	-0.395425	0.0111659	0.035368	-0.642302	0.0237047	0.0759588	-0.319044	0.00762875	0.024214	-0.215197	0.000833144	0.00225767
Cer 42:3;O2	Cer	RP_NegMSMS_258, 310		Y	nonGL	Cer 18:2;2O/24:1 M-H Atlas, Cer 18:2;2O/24:1 M+HCOO Atlas													RYZWCKUTHDRXFD-FTZNQNEXNA-N	C42H79NO3	2	M-H, M+HCOO	644.5983, 690.6042	390.3728, 644.5953	7.82	7.8	52.5606	6.89803	87.5	100	-0.370685	0.00121993	0.00285204	-0.477788	0.00108779	0.0054864	-0.551224	0.0415276	0.109273	-0.3226	0.00439342	0.0158773	-0.21912	0.000317729	0.000981436
alpha-Tocotrienol	Other lipids	RP_PosMS1_268		Y	nonGL	Cholest-5-ene-3.beta.,4.beta.-diol M+Na NIST --- alpha-Tocotrienol; LC-ESI-QTOF; MS2; CE M+H MassBank	Lipids and lipid-like molecules	Prenol lipids	Quinone and hydroquinone lipids	HMDB0006327	alpha-Tocotrienol	Prenol Lipids [PR]	Quinones and hydroquinones [PR02]	Vitamin E [PR0202]	LMPR02020054	alpha-tocotrienol			CZDKQKOAHAICSF-UHFFFAOYSA-N, RZFHLOLGZPDCHJ-XZXLULOTSA-N	C27H46O2, C29H44O2	1	M+H --- M+Na	425.344		2.56	2.56	60.4839	9.26639	79.3388	98.9796	-0.371821	0.00127021	0.002958	-0.131534	0.384925	0.385319	-0.427491	0.118063	0.221095	-0.248573	0.0308037	0.060299	-0.152132	0.0148866	0.0251411
Bilirubin	Bilirubins	RP_Pos, RP_NegMSMS_488, 194			nonGL	Bilirubin M+H HMDB, Bilirubin M-H HMDB	Organoheterocyclic compounds	Tetrapyrroles and derivatives	Bilirubins	HMDB0000054	Bilirubin								BPYKTIZUTYGOLE-IFADSCNNSA-N	C33H36N4O6	1, 2	M+H, M-H	585.2682, 583.2562	285.124	2.24	2.24	53.2258	13.9487	58.6777	96.9388	0.345304	0.00127949	0.00296802	0.303676	0.0290018	0.0740096	0.67425	0.00716539	0.0315009	0.248203	0.0200477	0.0448929	0.187873	0.00103634	0.00270975
FA 4:1	FA - Fatty esters	HILIC_PosMSMS_39		Y	nonGL	4-Hydroxybutanoic acid lactone M+H NIST	Organoheterocyclic compounds	Lactones	Gamma butyrolactones	HMDB0000549	gamma-Butyrolactone	Fatty Acyls [FA]	Fatty esters [FA07]	Lactones [FA0704]	LMFA07040004	Dihydrofuran-2(3H)-one	FA 4:1		YEJRWHAVMIAJKC-UHFFFAOYSA-N	C4H6O2	1	M+H	87.0438		11.9	11.9	31.8919	10.0404	97.479	100	0.375648	0.0013507	0.00312106	0.115264	0.45366	0.415435	0.450149	0.104913	0.205546	0.169467	0.150104	0.163356	0.151579	0.0169583	0.0278508
PA 34:1	PA	RP_NegMSMS_289		Y	nonGL	1-Hexadecanoyl-2-(9Z-octadecenoyl)-sn-glycero-3-phosphoric acid M-H NIST --- 1-Palmitoyl-2-oleoyl-sn-glycero-3-phosphate M-H NIST --- PA 16:0_18:1 M-H Atlas	Lipids and lipid-like molecules	Glycerophospholipids	Glycerophosphates	HMDB0007859	PA(16:0/18:1(9Z))	Glycerophospholipids [GP]	Glycerophosphates [GP10]	Diacylglycerophosphates [GP1001]	LMGP10010032	PA(16:0/18:1(9Z))	PA 34:1	PA 16:0_18:1	OPVZUEPSMJNLOM-QEJMHMKOSA-N, OPVZUEPSMJNLOM-ZCXUNETKNA-N, OPVZUEPSMJNLOM-ZCXUNETKSA-N	C37H71O8P	2	M-H	673.481	255.23	6.31	6.29	14.8248	17.1548	30	100	-0.382958	0.00139562	0.0032124	-0.305128	0.0501664	0.106449	-0.626815	0.0262044	0.0808013	-0.0790489	0.513373	0.333358	-0.19637	0.00223624	0.0052694
PC 42:9	PC	RP_PosMSMS_1203		Y	nonGL	PC 22:4_20:5 M+H Atlas													LTAIQBJVLRPGBI-BQKMNCPVNA-N	C50H82NO8P	1	M+H	856.58		5.5	5.45	22.5806	9.02645	56.1983	100	-0.385427	0.00145033	0.0033255	-0.42612	0.00620249	0.022345	-0.53567	0.0609418	0.145011	-0.295572	0.0139244	0.0347489	-0.213445	0.000948932	0.00252551
Maltol	Xenobiotics	HILIC_PosMSMS_142	RT_1		nonGL	Maltol M+H HMDB	Organoheterocyclic compounds	Pyrans	Pyranones and derivatives	HMDB0030776	Maltol								XPCTZQVDEJYUGT-UHFFFAOYSA-N	C6H6O3	1	M+H	127.038		6.39	6.4	63.7838	7.90209	100	100	-0.385497	0.00146871	0.00335473	-0.233927	0.13936	0.214541	-0.359252	0.211952	0.314434	-0.191531	0.11513	0.140172	-0.17037	0.00920424	0.0168837
ST 20:1;O2	ST - Steroids	RP_PosMS1_515		Y	nonGL	Mesterolone 2M+H NIST --- SL 10:0;O/22:0;O M+NH4 Atlas --- SL 11:0;O/21:0;O M+NH4 Atlas --- SL 12:0;O/20:0;O M+NH4 Atlas --- SL 13:0;O/19:0;O M+NH4 Atlas --- SL 14:0;O/18:0;O M+NH4 Atlas --- SL 15:0;O/17:0;O M+NH4 Atlas --- SL 16:0;O/16:0;O M+NH4 Atlas --- SL 17:0;O/15:0;O M+NH4 Atlas --- SL 18:0;O/14:0;O M+NH4 Atlas --- SL 19:0;O/13:0;O M+NH4 Atlas --- SL 20:0;O/12:0;O M+NH4 Atlas	Lipids and lipid-like molecules	Steroids and steroid derivatives	Androstane steroids	HMDB0006036	Mesterolone	Sterols [ST]	Steroids [ST02]	C19 steroids (androgens) and derivatives [ST0202]	LMST02020107	Mesterolone	ST 20:1;O2		GDOZQPZIXAACSZ-UHFFFAOYNA-N, JKUALCRUMCFJKQ-UHFFFAOYNA-N, LCBCUQRLMHNNBT-UHFFFAOYNA-N, LFDFFLFISZAKJK-UHFFFAOYNA-N, LSAKSTKIRPZIMO-UHFFFAOYNA-N, REFNXAHZRPIDOO-UHFFFAOYNA-N, SIGIGZHIXQPOML-UHFFFAOYNA-N, TWJWJDRAMBQNBG-UHFFFAOYNA-N, UXYRZJKIQKRJCF-TZPFWLJSSA-N, WAGNMMUEZVJMGA-UHFFFAOYNA-N, WSNXRLHJBZKZDW-UHFFFAOYNA-N, ZGSNAGFGBBTVCN-UHFFFAOYNA-N	C20H32O2	1	2M+H --- M+NH4	609.484		5.43	5.39	33.871	20.4278	90.9091	100	-0.380123	0.00147739	0.00336168	-0.221218	0.156721	0.228858	-0.459667	0.104409	0.205546	-0.192667	0.108067	0.135513	-0.171948	0.00765821	0.0146801
Asn-Pro	Amino acids, peptides, and analogues	HILIC_PosMSMS_536	RT_1		nonGL	Asn-Pro M+H-H2O NIST	Organic acids and derivatives	Carboxylic acids and derivatives	Amino acids, peptides, and analogues	HMDB0028739	Asparaginyl-Proline								GADKFYNESXNRLC-UHFFFAOYSA-N	C9H15N3O4	2	M+H-H2O	212.103	195.076	2.99	3	71.0811	5.67007	100	100	-0.386848	0.00149067	0.00337901	-0.253659	0.110291	0.18354	-0.117353	0.686077	0.558901	-0.344219	0.00418226	0.0156472	-0.161344	0.0143165	0.0243856
PC 35:4	PC	RP_PosMSMS_914		Y	nonGL	PC 15:0_20:4 M+H Atlas --- PC 17:2_18:2 M+H Atlas	Lipids and lipid-like molecules	Glycerophospholipids	Glycerophosphocholines	HMDB0007950	PC(15:0/20:4(8Z,11Z,14Z,17Z))	Glycerophospholipids [GP]	Glycerophosphocholines [GP01]	Diacylglycerophosphocholines [GP0101]	LMGP01011563	PC(17:2(9Z,12Z)/18:2(9Z,12Z))	PC 35:4	PC 17:2_18:2	JSXZJOMDSXRJMT-LTFXTMEVNA-N, XSAUCFBUCBKVEB-KWXKLSQINA-N	C43H78NO8P	1	M+H	768.55		5.56	5.55	69.8925	5.37757	100	100	-0.36568	0.0016373	0.00369731	-0.367289	0.0142817	0.0436622	-0.460652	0.0934613	0.190351	-0.214987	0.0640512	0.0976425	-0.193489	0.00184397	0.00450534
dTMP	Pyrimidine deoxyribonucleotides	HILIC_NegMS1_643			nonGL	5-Thymidylic acid M-H HMDB --- Thymidine 5'-monophosphate M-H NIST --- Thymidine-5'-monophosphate; LC-ESI-QTOF; MS2; CE M-H MassBank --- Thymidine??5'-monophosphate M-H FiehnHILIC	Nucleosides, nucleotides, and analogues	Pyrimidine nucleotides	Pyrimidine deoxyribonucleotides	HMDB0001227	5-Thymidylic acid								GYOZYWVXFNDGLU-UHFFFAOYNA-N, GYOZYWVXFNDGLU-XLPZGREQSA-N	C10H15N2O8P	1	M-H	321.052		13.7	13.7	66.3957	11.0254	99.1525	100	0.371951	0.00171325	0.00385422	0.30205	0.0498761	0.106442	0.759352	0.00606846	0.027868	0.304822	0.00945183	0.0277533	0.199735	0.00163268	0.00408966
Cer 33:1;O2	Cer	RP_NegMSMS_186		Y	nonGL	Cer 17:1;2O/16:0 M+HCOO Atlas	Lipids and lipid-like molecules	Sphingolipids	Ceramides	HMDB0240685	Cer(d17:1/16:0)								KXVLPPCAUYSNGY-BYCLXTJYNA-N	C33H65NO3	2	M+HCOO	568.495	280.262	6.05	6.03	6.19946	13.8919	19.1667	100	-0.381481	0.00180475	0.00404481	-0.454142	0.00374768	0.0150751	-0.856484	0.00255151	0.0140428	-0.195793	0.109865	0.136812	-0.234304	0.000296671	0.000930859
Cer 32:1;O2	Cer	RP_NegMSMS_175		Y	nonGL	Cer 16:1;2O/16:0 M+HCOO Atlas	Lipids and lipid-like molecules	Sphingolipids	Ceramides	HMDB0240681	Cer(d16:1/16:0)								PIVKMDKERPTVGC-IMVLJIQENA-N	C32H63NO3	2	M+HCOO	554.479	280.262	5.74	5.71	16.442	19.2126	50	100	-0.371337	0.00182233	0.00406891	-0.638138	1.70916e-05	0.000219735	-0.896813	0.0011283	0.00818548	-0.290137	0.0140532	0.0347489	-0.26582	1.91726e-05	7.61995e-05
2-Pyrrolidinone	Organoheterocyclic compounds	HILIC_PosMSMS_33	RT_1		nonGL	2-Pyrrolidinone M+H HMDB	Organoheterocyclic compounds	Pyrrolidines	Pyrrolidones	HMDB0002039	2-Pyrrolidinone								HNJBEVLQSNELDL-UHFFFAOYSA-N	C4H7NO	2	M+H	86.0597	44.0126	1.58	1.58	100	10.0504	100	100	-0.383675	0.00184123	0.00409576	-0.279223	0.0814748	0.150906	-0.406732	0.163455	0.272799	-0.339942	0.00516663	0.0175661	-0.18032	0.00652994	0.0130197
LPE 20:4	LPE	RP_NegMSMS_125		Y	nonGL	LPE 20:4 M-H Atlas	Lipids and lipid-like molecules	Glycerophospholipids	Glycerophosphoethanolamines	HMDB0011518	LysoPE(20:4(8Z,11Z,14Z,17Z)/0:0)	Glycerophospholipids [GP]	Glycerophosphoethanolamines [GP02]	Monoacylglycerophosphoethanolamines [GP0205]	LMGP02050067	PE(20:4(8Z,11Z,14Z,17Z)/0:0)	LPE 20:4	LPE 20:4	JPNPIRVRGLGTRE-LTKCOYKYNA-N	C25H44NO7P	2	M-H	500.278	303.227	2.56	2.56	77.8976	7.27672	87.5	100	-0.355192	0.0019099	0.00423274	-0.332202	0.024812	0.0675042	-0.492201	0.0683382	0.156416	-0.251126	0.0274072	0.0553268	-0.186015	0.00239425	0.00555391
2-(3-Phenylpropyl)pyridine --- Dibenzylamine	Xenobiotics	HILIC_PosMSMS_491			nonGL	2-(3-Phenylpropyl)pyridine M+H HMDB --- Dibenzylamine M+H HMDB --- Dibenzylamine M+H NIST --- m,m'-Ditolylamine M+H NIST --- p,p'-Ditolylamine M+H NIST	Organoheterocyclic compounds --- Benzenoids	Pyridines and derivatives --- Benzene and substituted derivatives	NA --- Phenylmethylamines	HMDB0036173, HMDB0251169	2-(3-Phenylpropyl)pyridine --- Dibenzylamine								BWLUMTFWVZZZND-UHFFFAOYSA-N, CWVPIIWMONJVGG-UHFFFAOYSA-N, JJJPNTQYUJPWGQ-UHFFFAOYSA-N, RHPVVNRNAHRJOQ-UHFFFAOYSA-N	C14H15N	1	M+H	198.131		1.38	1.37	97.5676	11.1823	100	100	-0.3792	0.0019612	0.00433033	-0.229388	0.151018	0.224023	-0.264399	0.363626	0.421034	-0.237078	0.0524156	0.0876624	-0.162726	0.0138921	0.0237986
PyroGlu-Phe	Amino acids, peptides, and analogues	HILIC_PosMSMS_835	RT_1		nonGL	PyroGlu-Phe M+H NIST	Organic acids and derivatives	Carboxylic acids and derivatives	Amino acids, peptides, and analogues										XCEZCXFVJLMPKG-UHFFFAOYSA-N	C14H16N2O4	1	M+H	277.118		5.82	5.79	33.2432	8.02766	100	100	-0.375537	0.0020991	0.0046177	-0.436233	0.00535385	0.0205284	-0.704387	0.0136897	0.0519479	-0.314167	0.00928168	0.0275669	-0.22137	0.00064597	0.00182574
LPE 18:1	LPE	RP_Pos, RP_NegMSMS_330, 121		Y	nonGL	1-(9Z-Octadecenoyl)-sn-glycero-3-phosphoethanolamine M+H NIST --- LPE 18:1 M+H Atlas, 1-(9Z-Octadecenoyl)-sn-glycero-3-phosphoethanolamine M-H NIST	Lipids and lipid-like molecules	Glycerophospholipids	Glycerophosphoethanolamines	HMDB0011506	LysoPE(18:1(9Z)/0:0)	Glycerophospholipids [GP]	Glycerophosphoethanolamines [GP02]	Monoacylglycerophosphoethanolamines [GP0205]	LMGP02050004	PE(18:1(9Z)/0:0)	LPE 18:1	LPE 18:1	PYVRVRFVLRNJLY-KTKRTIGZNA-N, PYVRVRFVLRNJLY-MZMPXXGTSA-N, PYVRVRFVLRNJLY-MZMPXXGTSA-N	C23H46NO7P	1, 2	M+H, M-H	480.3067, 478.2936	281.247	3	2.995	68.4636	4.49911	100	100	-0.352109	0.00217961	0.00477719	-0.266916	0.0737959	0.141066	-0.29963	0.271646	0.361691	-0.183303	0.110926	0.1378	-0.163436	0.00823648	0.0155144
Gly-Trp-Lys --- Ser-Gln-Arg --- Thr-Asn-Arg	Amino acids, peptides, and analogues	RP_PosMS1_184			nonGL	Alfuzosin M+H FiehnHILIC --- Alfuzosin M+H HMDB --- Alfuzosin M+H NIST --- Gly-Trp-Lys M+H NIST --- Ser-Gln-Arg M+H NIST --- Thr-Asn-Arg M+H NIST --- Trp-Gly-Lys M+H NIST	Organoheterocyclic compounds	Diazanaphthalenes	Benzodiazines		Alfuzosin								IRKWVRSEQFTGGV-UHFFFAOYSA-N, LKJCZEPXHOIAIW-UHFFFAOYSA-N, RNMRYWZYFHHOEV-UHFFFAOYSA-N, WLBZWXXGSOLJBA-UHFFFAOYSA-N, WNMJYKCGWZFFKR-UHFFFAOYNA-N, WNMJYKCGWZFFKR-UHFFFAOYSA-N	C19H27N5O4	1	M+H	390.207		3.32	3.3	17.7419	23.8563	54.5455	100	-0.369038	0.00225509	0.00490504	-0.307081	0.050001	0.106442	-0.616286	0.02985	0.0877016	-0.0257024	0.832825	0.427878	-0.192172	0.00297529	0.00674429
Guanidoacetic acid --- Indole	Amino acids, peptides, and analogues --- Indoles and derivatives	HILIC_NegMS1_35	RT_2		nonGL	Glycocyamine; LC-ESI-QTOF; MS2; CE M-H MassBank --- Guanidinoacetic acid M-H FiehnHILIC --- Guanidoacetic acid M-H HMDB --- Indole M-H HMDB	Organic acids and derivatives --- Organoheterocyclic compounds	Carboxylic acids and derivatives --- Indoles and derivatives	Amino acids, peptides, and analogues --- Indoles	HMDB0000128, HMDB0000738	Guanidoacetic acid --- Indole								BPMFZUMJYQTVII-UHFFFAOYSA-N, SIKJAQJRHWYJAI-UHFFFAOYSA-N	C3H7N3O2, C8H7N	1	M-H	116.051		10.87	10.86	97.29	18.9391	94.9153	100	-0.372703	0.00227085	0.00490504	-0.365713	0.0203502	0.0572661	-0.785093	0.00576967	0.027012	-0.254167	0.0365211	0.0678906	-0.212486	0.00108783	0.00280746
Indomethacin	Indoles and derivatives	HILIC_NegMS1_753			nonGL	Indomethacin M-H FiehnHILIC --- Indomethacin M-H HMDB --- Indomethacin; LC-ESI-ITFT; MS2; CE M-H MassBank --- LNAPS 2:0/N-3:0 M-H Atlas --- LNAPS 3:0/N-2:0 M-H Atlas --- PS 2:0_3:0 M-H Atlas	Organoheterocyclic compounds	Indoles and derivatives	Benzoylindoles	HMDB0014473	Indomethacin								CGIGDMFJXJATDK-UHFFFAOYSA-N, LZEYPKDVMFCPKP-UHFFFAOYNA-N, QJFPSNUFMNRRRJ-UHFFFAOYNA-N, UVUXYOKGIYVSSD-UHFFFAOYNA-N	C19H16ClNO4	1	M-H	356.067		9.41	9.41	63.9566	6.07287	100	100	-0.368138	0.00226292	0.00490504	-0.114279	0.469025	0.421888	-0.586384	0.0385941	0.105802	-0.388013	0.000993522	0.00570488	-0.156509	0.016241	0.0269701
TAG 58:6	TAG	RP_PosMSMS_1448		Y	GL	TG 18:0_18:1_22:5 M+NH4 Atlas --- TG 18:1_18:1_22:4 M+NH4 Atlas	Lipids and lipid-like molecules	Glycerolipids	Triradylcglycerols	HMDB0044962	TG(18:0/18:1(9Z)/22:5(7Z,10Z,13Z,16Z,19Z))	Glycerolipids [GL]	Triradylglycerols [GL03]	Triacylglycerols [GL0301]	LMGL03011227	TG(18:0/18:1(9Z)/22:5(7Z,10Z,13Z,16Z,19Z))[iso6]	TG 58:6	TG 18:0_18:1_22:5	JAESNECUPYJIJZ-BAPPQAHFNA-N, MLZUUSCOTWOREA-BMQZPGLHNA-N	C61H106O6	2	M+NH4	952.826	679.563	11.04	11.02	53.2258	7.32341	57.0248	100	0.364275	0.00226889	0.00490504	0.119964	0.442427	0.41144	0.388768	0.16875	0.277776	0.20568	0.0846006	0.116034	0.145885	0.0238704	0.0372529
TAG 57:11	TAG	RP_PosMS1_1404		Y	GL	DGGA 18:0_26:1 M+NH4 Atlas --- DGGA 20:0_24:1 M+NH4 Atlas --- DGGA 22:0_22:1 M+NH4 Atlas --- DGGA 23:0_21:1 M+NH4 Atlas --- DGGA 24:0_20:1 M+NH4 Atlas --- DGGA 25:0_19:1 M+NH4 Atlas --- DGGA 26:0_18:1 M+NH4 Atlas --- DGGA 27:0_17:1 M+NH4 Atlas --- TG 11:0_16:3_30:8 M+NH4 Atlas --- TG 11:0_16:4_30:7 M+NH4 Atlas --- TG 11:0_18:4_28:7 M+NH4 Atlas --- TG 11:0_18:5_28:6 M+NH4 Atlas --- TG 11:0_20:4_26…	Lipids and lipid-like molecules	Glycerolipids	Triradylcglycerols	HMDB0043741	TG(15:0/20:5(5Z,8Z,11Z,14Z,17Z)/22:6(4Z,7Z,10Z,13Z,16Z,19Z))	Glycerolipids [GL]	Triradylglycerols [GL03]	Triacylglycerols [GL0301]	LMGL03011168 --- LMGL03011387 --- LMGL03014136 --- LMGL03015327 --- LMGL03015677 --- LMGL03016032 --- LMGL03016110	TG(13:0/22:5(7Z,10Z,13Z,16Z,19Z)/22:6(4Z,7Z,10Z,13Z,16Z,19Z))[iso6] --- TG(15:0/20:5(5Z,8Z,11Z,14Z,17Z)/22:6(4Z,7Z,10Z,13Z,16Z,19Z))[iso6] --- TG(15:1(9Z)/20:5(5Z,8Z,11Z,14Z,17Z)/22:5(7Z,10Z,13Z,16Z,19Z))[iso6] --- TG(17:1(9Z)/18:4(6Z,9Z,12Z,15Z)/22:6(4Z,7Z,10Z,13Z,16Z,19Z))[iso6] --- TG(17:1(9Z)/20:5(5Z,8Z,11Z,14Z,17Z)/20:5(5Z,8Z,11Z,14Z,17Z))[iso3] --- TG(17:2(9Z,12Z)/18:3(9Z,12Z,15Z)/22:6(4Z,7…	TG 57:11	TG 13:0_22:5_22:6 --- TG 15:0_20:5_22:6 --- TG 15:1_20:5_22:5 --- TG 17:1_18:4_22:6 --- TG 17:1_20:5_20:5 --- TG 17:2_18:3_22:6 --- TG 17:2_18:4_22:5	AEJUNCAWTIMNDX-VIYSHAHNNA-N, BCFLIYMMYUNOMR-JPFARBKLNA-N, BGLOMFIHEQQTFF-OGRALKHENA-N, BIBFGCFOXDOYRK-APGYTCESNA-N, BKAHLMMQQAEVBF-OOAXWGSJNA-N, BKTRNATYZIJPSH-IMRQLAEWNA-N, BQDICMODFXLECN-IOQDQLDYNA-N, BTXWZTHQFCSBEA-XHGSFUHHNA-N, BYECXWHLJUAVER-TWJWZTBNNA-N, CECJWEBKPLNFQM-ZOXDXHMKNA-N, CGFKFTHJIDNZHR-YGUWVDAVNA-N, CLQBVCASJCVXOF-AACKMNFXNA-N, CXDCIBVBSSLGEK-YBFHQSEGNA-N, DHVDEHQVCJBZCZ-MIAZLBD…	C60H94O6	1	M+NH4	928.739		10.59	10.57	92.2043	3.30706	100	100	-0.372582	0.00233508	0.00502556	-0.348046	0.027854	0.0729866	-0.919247	0.00114667	0.00818548	-0.253114	0.0377708	0.0699622	-0.216492	0.00088642	0.00239117
Pantothenic acid	Vitamins and cofactors	HILIC_Pos, HILIC_NegMSMS_563, 330			nonGL	D-(+)-Pantothenic acid; LC-ESI-QTOF; MS2; CE M+H MassBank --- Pantothenic acid M+H FiehnHILIC --- Pantothenic acid M+H HMDB --- Pantothenic acid M+H NIST, Pantothenic acid M-H HMDB	Organic oxygen compounds	Organooxygen compounds	Alcohols and polyols	HMDB0000210	Pantothenic acid								GHOKWGTUZJEAQD-UHFFFAOYNA-N, GHOKWGTUZJEAQD-UHFFFAOYSA-N, GHOKWGTUZJEAQD-ZETCQYMHSA-N, GHOKWGTUZJEAQD-ZETCQYMHSA-N	C9H17NO5	1	M+H, M-H	220.1177, 218.103		6.095	6.1	99.729	3.68945	100	100	0.365159	0.0023521	0.00504398	0.153852	0.326874	0.361419	0.516972	0.0676999	0.156416	0.274043	0.0214712	0.047217	0.158903	0.0141696	0.0242044
Cer 41:2;O2	Cer	RP_NegMSMS_294		Y	nonGL	Cer 17:1;2O/24:1 M+HCOO Atlas --- Cer 18:2;2O/23:0 M+HCOO Atlas													IHCUODHUCJDYIO-XDORPINWNA-N, YVMFSKMDQVDKIS-QCVIXQMPNA-N	C41H79NO3	2	M+HCOO	678.604	632.59	8.05	8.03	35.0404	7.46985	87.5	100	-0.369733	0.00246497	0.00526709	-0.554805	0.000323402	0.00212045	-0.374372	0.195396	0.303476	-0.322478	0.00747641	0.0239982	-0.222944	0.000582328	0.0016771
PE 35:2	PE	RP_Pos, RP_NegMSMS_803, 369		Y	nonGL	PE 16:1_19:1 M+H Atlas --- PE 17:0_18:2 M+H Atlas, PE 17:0_18:2 M-H Atlas						Glycerophospholipids [GP]	Glycerophosphoethanolamines [GP02]	Diacylglycerophosphoethanolamines [GP0201]	LMGP02010528 --- LMGP02010546, LMGP02010546	PE(16:1(9Z)/19:1(9Z)) --- PE(17:0/18:2(9Z,12Z)), PE(17:0/18:2(9Z,12Z))	PE 35:2	PE 16:1_19:1 --- PE 17:0_18:2, PE 17:0_18:2	UJCJWIHZUHMDIT-OHNCOSGTNA-N, WCYWDSBANAFPOJ-JHHNDBJRNA-N, UJCJWIHZUHMDIT-OHNCOSGTNA-N	C40H76NO8P	1, 2	M+H, M-H	730.5338, 728.524	279.232	6.195	6.16	28.5714	7.16263	86.6667	100	-0.352256	0.00260642	0.00554944	-0.336879	0.025806	0.0699185	-0.407675	0.140439	0.250012	-0.125602	0.284921	0.242177	-0.181498	0.00378569	0.00838987
SM 38:1;O2	SM	RP_Pos, RP_NegMSMS_958, 887, 559		Y	nonGL	SM 38:1;2O M+Na Atlas, SM 18:1;2O/20:0 M+H Atlas --- SM 36:1;2O/2:0 M+H Atlas, SM 18:1;2O/20:0 M+HCOO Atlas --- SM 36:1;2O/2:0 M+HCOO Atlas	Lipids and lipid-like molecules	Sphingolipids	Phosphosphingolipids	HMDB0012102	SM(d18:1/20:0)	Sphingolipids [SP]	Phosphosphingolipids [SP03]	Ceramide phosphocholines (sphingomyelins) [SP0301]	LMSP03010005	SM(d18:1/20:0)	SM 38:1;O2	SM 18:1;O2/20:0	NAIGNGOCIQTQSL-ZCXUNETKNA-N, AADLTHQNYQJHQV-JMUUFCRMNA-N, SKLSBBCBJVDCPQ-BSRQYYOTNA-N	C43H87N2O6P	2, 1	M+Na, M+H, M+HCOO	781.6153, 759.6326, 803.6284	598.5524, 168.0418	6.86	6.8	88.7097	4.74201	100	100	-0.36436	0.00261926	0.00555694	-0.436621	0.00487417	0.0189104	-0.301103	0.294217	0.378122	-0.160012	0.187289	0.187211	-0.196781	0.00235822	0.00549171
PS 36:0	PS	HILIC_NegMSMS_1329		Y	nonGL	1,2-Dioleoyl-sn-glycero-3-phospho-rac-1-glycerol M-H NIST --- 1,2-Distearoyl-sn-glycero-3-phospho-L-serine M-H-NH3 NIST --- 1-Linoleoyl-2-stearoyl-sn-glycero-3-phospho-(1'-sn-glycerol) M-H NIST --- 1-Stearoyl-2-linoleoyl-sn-glycero-3-phospho-(1'-rac-glycerol) M-H NIST --- Nis(monooleoylglycero)phosphate (S,R Isomer) M-H NIST --- PG 10:0_26:2 M-H Atlas --- PG 12:0_24:2 M-H Atlas --- PG 14:0_22:2 M…	Lipids and lipid-like molecules	Glycerophospholipids	Glycerophosphoserines	HMDB0012378	PS(18:0/18:0)	Glycerophospholipids [GP]	Glycerophosphoserines [GP03]	Diacylglycerophosphoserines [GP0301]	LMGP03010036	PS(18:0/18:0)	PS 36:0	PS 18:0/18:0	BGEUWQSTNWMQQX-UDJAPEQQNA-N, BWROGLIMDHGHPP-JSCMVKKRNA-N, CZVJBYZXTBYGJR-RPSBWMBSSA-N, DIGVZHFOQWDIAN-XOMYGGGSNA-N, DSNRWDQKZIEDDB-CLFAGFIQNA-N, DSNRWDQKZIEDDB-GCMPNPAFSA-N, GNCZTBXGLUHKAP-LXNLGIMZSA-N, JCFBOTWFLXFFSP-WITMPDRSNA-N, JPRWHUSRRGNLOV-MLWYYCKJNA-N, JPRWHUSRRGNLOV-PFFGWFQCSA-N, KCKGLJVIRBHMMZ-AUGURXLVNA-N, KDFIYBDWNQKADP-BCTRXSSUNA-N, LUWXRSFMFYJYLK-DUZKARGPNA-N, NZOPAXSEGUBUAI-BIXSNLI…	C42H82NO10P	1	M-H --- M-H-NH3	773.537		6.62	6.62	23.3062	8.61367	72.8814	100	0.367232	0.0027318	0.00577515	0.23072	0.148195	0.221738	0.417647	0.149384	0.262053	0.132502	0.281373	0.240745	0.167692	0.0110625	0.0199245
LPE 22:6	LPE	RP_PosMSMS_399		Y	nonGL	LPE 22:6 M+H Atlas	Lipids and lipid-like molecules	Glycerophospholipids	Glycerophosphoethanolamines	HMDB0011526	LysoPE(22:6(4Z,7Z,10Z,13Z,16Z,19Z)/0:0)	Glycerophospholipids [GP]	Glycerophosphoethanolamines [GP02]	Monoacylglycerophosphoethanolamines [GP0205]	LMGP02050013	PE(22:6(4Z,7Z,10Z,13Z,16Z,19Z)/0:0)	LPE 22:6	LPE 22:6	XEVRBOQZSXWGQO-KUBAVDMBNA-N	C27H44NO7P	1	M+H	526.291		2.56	2.56	67.7419	3.47394	100	100	-0.353864	0.00275914	0.00581233	-0.304788	0.0464857	0.101937	-0.567683	0.0409671	0.109081	-0.310956	0.0076842	0.024214	-0.184844	0.00349325	0.00779976
N-Methylanthranilic acid	Xenobiotics	HILIC_PosMSMS_275	RT_1		nonGL	N-Methylanthranilic acid M+H FiehnHILIC	Benzenoids	Benzene and substituted derivatives	Benzoic acids and derivatives	HMDB0032609	2-(Methylamino)benzoic acid								WVMBPWMAQDVZCM-UHFFFAOYSA-N	C8H9NO2	1	M+H	152.07		10.35	10.35	64.0541	7.16225	100	100	-0.361882	0.00290253	0.00609286	-0.228178	0.149139	0.221738	-0.266419	0.355199	0.417771	-0.233605	0.0536078	0.0887942	-0.157669	0.0161559	0.0269357
Guanidinosuccinic acid --- Indoleacetic acid	Amino acids, peptides, and analogues --- Indoles and derivatives	HILIC_NegMS1_219			nonGL	1-Methoxy-3-carbaldehyde; LC-ESI-QTOF; MS2; CE M-H MassBank --- 3-Indoleacetic acid M-H FiehnHILIC --- Guanidinosuccinic acid M-H HMDB --- Indole-3-acetic acid M-H FiehnHILIC --- Indoleacetic acid; LC-ESI-QTOF; MS2; CE M-H MassBank	Organoheterocyclic compounds --- Organic acids and derivatives	Indoles and derivatives --- Carboxylic acids and derivatives	Indolyl carboxylic acids and derivatives --- Amino acids, peptides, and analogues	HMDB0000197, HMDB0003157	Indoleacetic acid --- Guanidinosuccinic acid								NFGIENSPALNOON-UHFFFAOYSA-N, SEOVTRFCIGRIMH-UHFFFAOYSA-N, VVHOUVWJCQOYGG-REOHCLBHSA-N	C10H9NO2, C5H9N3O4	1	M-H	174.056		1.77	1.79	97.019	7.82164	99.1525	100	-0.365404	0.00298891	0.00625218	-0.187082	0.243778	0.301581	-0.510184	0.0784775	0.171758	-0.232961	0.0574295	0.0930369	-0.16444	0.0131415	0.0226429
PyroGlu-Tyr	Amino acids, peptides, and analogues	HILIC_PosMSMS_930			nonGL	PyroGlu-Tyr M+H NIST	Organic acids and derivatives	Carboxylic acids and derivatives	Amino acids, peptides, and analogues										ILJOYLTXYCZXTB-UHFFFAOYSA-N	C14H16N2O5	2	M+H	293.113	165.054	8.51	8.52	64.0541	4.81695	100	100	-0.363974	0.00300871	0.00627159	-0.32504	0.0405373	0.0935885	-0.591946	0.0398953	0.10807	-0.197049	0.1079	0.135513	-0.192578	0.00334577	0.00749856
PE O-36:5	PE-O	RP_Pos, RP_NegMSMS_784, 357		Y	nonGL	PE O-16:1_20:4 M+H Atlas, PE O-16:1_20:4 M-H Atlas													YATSYZSZUULQDZ-GKPKDRHFNA-N	C41H74NO7P	2	M+H, M-H	724.5236, 722.5139	364.2579, 303.2314	6.195	6.16	82.5269	5.71742	100	100	-0.353742	0.0031079	0.00645578	-0.256917	0.0982133	0.170839	-0.361416	0.201495	0.306696	0.110695	0.356671	0.274297	-0.165437	0.010152	0.0185084
FA 22:6;O	FA - Docosanoids	RP_PosMS1_51	RT_1	Y	nonGL	(+/-)-16(17)-Epoxy-4Z,7Z,10Z,13Z,19Z-docosapentaenoic acid M+H-H2O NIST --- (.+/-.)-10-Hydroxy-4Z,7Z,11E,13Z,16Z,19Z-docosahexaenoic acid M+H-H2O NIST --- (.+/-.)-11-Hydroxy-4Z,7Z,9E,13Z,16Z,19Z-docosahexaenoic acid M+H-H2O NIST --- (.+/-.)-13-Hydroxy-4Z,7Z,10Z,14E,16Z,19Z-docosahexaenoic acid M+H-H2O NIST --- (.+/-.)-14-Hydroxy-4Z,7Z,10Z,12E,16Z,19Z-docosahexaenoic acid M+H-H2O NIST --- (.+/-.)-…	Lipids and lipid-like molecules	Fatty Acyls	Fatty acids and conjugates	HMDB0010213, HMDB0013621	17-HDoHE --- 16(17)-EpDPE	Fatty Acyls [FA]	Docosanoids [FA04]		LMFA04000024 --- LMFA04000025 --- LMFA04000026 --- LMFA04000027 --- LMFA04000028 --- LMFA04000029 --- LMFA04000030 --- LMFA04000031 --- LMFA04000032 --- LMFA04000037	(+/-)-10-HDoHE --- (+/-)-11-HDoHE --- (+/-)-13-HDoHE --- (+/-)-14-HDoHE --- (+/-)-16-HDoHE --- (+/-)-17-HDoHE --- (+/-)-4-HDoHE --- (+/-)-7-HDoHE --- (+/-)-8-HDoHE --- 16(17)-EpDPE	FA 22:6;O		BCTXZWCPBLWCRV-ZYADFMMDSA-N, CSXQXWHAGLIFIH-VUARBJEWSA-N, DDCYKEYDTGCKAS-SKSHMZPZSA-N, FRQMUZJSZHZSGN-UHFFFAOYSA-N, IFRKCNPQVIJFAQ-PQVBWYSWSA-N, LTERDCBCHFKFRI-BGKMTWLOSA-N, OSXOPUBJJDUAOJ-MWEXLPNRSA-N, OXENLKNOBTVOJA-JLNKQSITSA-N, OZXAIGIRPOOJTI-XJAVJPOHSA-N, PWVSFTLICCBISU-SEQVKQOISA-N, SEVOKGDVLLIUMT-SKSHMZPZSA-N, SWTYBBUBEPPYCX-VIIQGJSXSA-N, ZHBVYDMSPDDAKE-VTIZNUJUSA-N, ZNEBXONKCYFJAF-BGKMTWL…	C22H32O3	1	M+H --- M+H-H2O	327.239		3.32	3.04	92.2043	10.7493	88.4298	100	-0.343383	0.0032015	0.0066271	-0.241242	0.11095	0.183703	-0.315461	0.252588	0.348208	-0.263532	0.0224886	0.0482232	-0.157281	0.0121445	0.0214838
PE 33:2	PE	RP_Pos, RP_NegMSMS_715, 318		Y	nonGL	PE 15:0_18:2 M+H Atlas, LNAPE 18:2/N-15:0 M-H Atlas --- PE 15:0_18:2 M-H Atlas	Lipids and lipid-like molecules	Glycerophospholipids	Glycerophosphoethanolamines	HMDB0008895	PE(15:0/18:2(9Z,12Z))	Glycerophospholipids [GP]	Glycerophosphoethanolamines [GP02]	Diacylglycerophosphoethanolamines [GP0201]	LMGP02011232	PE(15:0/18:2(9Z,12Z))	PE 33:2	PE 15:0_18:2	QAXAIGXHZKFJPP-BCTRXSSUNA-N, AKKVFAMHPNGEEV-BCTRXSSUNA-N, QAXAIGXHZKFJPP-BCTRXSSUNA-N	C38H72NO8P	2	M+H, M-H	702.5031, 700.492	561.4875, 279.2315	5.565	5.55	36.9272	7.65694	97.5207	100	-0.34379	0.00327119	0.00672467	-0.217565	0.152519	0.224966	-0.515773	0.0606424	0.144776	-0.0993803	0.397098	0.291499	-0.163904	0.00909103	0.0167317
Ascorbyl palmitate	Other lipids	HILIC_PosMS1_1512		Y	nonGL	Ascorbic acid 6-palmitate M+Na NIST	Lipids and lipid-like molecules	Fatty Acyls	Fatty acid esters	HMDB0039883	Ascorbyl palmitate	Fatty Acyls [FA]	Fatty esters [FA07]	Wax monoesters [FA0701]	LMFA07010788	Ascorbyl palmitate	WE 22:3;O5		QAQJMLQRFWZOBN-UWJYYQICSA-N	C22H38O7	1	M+Na	437.25		12.77	12.76	62.973	7.5704	99.1597	100	-0.353492	0.00326645	0.00672467	-0.266894	0.0869988	0.158452	-0.243543	0.392624	0.434185	-0.303753	0.0104775	0.029111	-0.160843	0.0129335	0.0224141
N-Phenylacetylaspartic acid	Amino acids, peptides, and analogues	HILIC_NegMSMS_435			nonGL	N-Phenylacetylaspartic acid M-H HMDB	Organic acids and derivatives	Carboxylic acids and derivatives	Amino acids, peptides, and analogues	HMDB0029355	N-Phenylacetylaspartic acid								SVFKZPQPMMZHLZ-UHFFFAOYSA-N	C12H13NO5	1	M-H	250.074		7.35	7.36	29.2683	18.4498	72.0339	100	0.34631	0.00331689	0.00679518	0.234117	0.126648	0.201063	0.235796	0.398951	0.438472	0.271102	0.0203059	0.045232	0.152629	0.0163474	0.0270713
Cyclic AMP	Purines and purine derivatives	HILIC_NegMSMS_664			nonGL	Adenosine 2',3'-cyclic monophosphate M-H NIST --- Cyclic AMP M-H HMDB	Nucleosides, nucleotides, and analogues	Purine nucleotides	Cyclic purine nucleotides	HMDB0000058	Cyclic AMP								IVOMOUWHDPKRLL-KQYNXXCUSA-N, KMYWVDDIPVNLME-CRKDRTNXSA-N	C10H12N5O6P	1	M-H	328.046		12.28	12.29	27.3713	21.1567	84.7458	100	0.34175	0.00340307	0.00694785	0.137473	0.366726	0.376331	0.384336	0.163166	0.272799	0.253554	0.02852	0.0566876	0.142279	0.0239454	0.0372723
FA 20:3;O4	FA - Eicosanoids	HILIC_PosMS1_1368		Y	nonGL	19(R)-Hydroxyprostaglandin F2.alpha. M+Na NIST --- 6-Ketoprostaglandin F1.alpha. M+Na NIST --- Ala-Phe-Arg M+H NIST --- Methyl arachidonyl fluorophosphonate M+Na NIST --- Phe-Ala-Arg M+H NIST	Lipids and lipid-like molecules	Fatty Acyls	Eicosanoids	HMDB0002886	6-Keto-prostaglandin F1a	Fatty Acyls [FA]	Eicosanoids [FA03]	Prostaglandins [FA0301]	LMFA03010001 --- LMFA03010042	19R-hydroxy-PGF2alpha --- 6-keto-PGF1alpha	FA 20:3;O4		JVTMTFMMMHAPCR-UHFFFAOYSA-N, KFGOFTHODYBSGM-ZUNNJUQCSA-N, KWKZCGMJGHHOKJ-ZKWNWVNESA-N, PEIBBAXIKUAYGN-UHFFFAOYSA-N, UBWZMPMLSDJDSU-OQRQNLQMSA-N	C20H34O6	1	M+H --- M+Na	393.222		8.65	8.67	54.0541	24.9456	77.3109	100	0.353061	0.00344878	0.00701715	0.210294	0.180753	0.252697	0.777226	0.00559441	0.0265361	0.189748	0.115512	0.140172	0.179193	0.00562233	0.011558
LPC 18:1	LPC	RP_Pos, RP_NegMSMS_371, 393, 427, 450, 182		Y	nonGL	1-(9Z-Octadecenoyl)-sn-glycero-3-phosphocholine M+H-H2O NIST, 1-(9Z-Octadecenoyl)-sn-glycero-3-phosphocholine M+H NIST --- PC O-18:1 M+H Atlas, 1-(9Z-Octadecenoyl)-sn-glycero-3-phosphocholine M+Na NIST --- LPC 18:1 M+Na Atlas, 1-(9Z-Octadecenoyl)-sn-glycero-3-phosphocholine M+K NIST, LPC 18:1 M+HCOO Atlas	Lipids and lipid-like molecules	Glycerophospholipids	Glycerophosphocholines	HMDB0002815	LysoPC(18:1(9Z)/0:0)	Glycerophospholipids [GP]	Glycerophosphocholines [GP01]	Monoacylglycerophosphocholines [GP0105]	LMGP01050032, LMGP01050030 --- LMGP01050032 --- LMGP01050114	PC(18:1(9Z)/0:0), PC(18:1(9E)/0:0) --- PC(18:1(9Z)/0:0) --- PC(18:1(9Z)/0:0)[rac]	LPC 18:1	LPC 18:1	YAMUFBLWGFFICM-PTGWMXDISA-N, YAMUFBLWGFFICM-PTGWMXDISA-N, ZXKRRQJZHGEFOW-KHPPLWFENA-N, YAMUFBLWGFFICM-PTGWMXDISA-N, YAMUFBLWGFFICM-SEYXRHQNNA-N, YAMUFBLWGFFICM-SEYXRHQNNA-N	C26H52NO7P	1, 2	M+H-H2O, M+H, M+Na, M+K, M+HCOO	504.34, 522.3534, 544.3351, 560.3089, 566.3467	506.32	2.96	2.98	80.6452	5.99054	100	100	-0.356631	0.00347343	0.00704327	-0.346107	0.0279403	0.0729866	-0.263834	0.361484	0.421034	-0.268848	0.0263148	0.0537515	-0.176713	0.00696543	0.0136596
N-Acetylmuramate	Carbohydrates and carbohydrate conjugates	HILIC_PosMS1_936			nonGL	N-Acetylmuramate M+H HMDB	Organic oxygen compounds	Organooxygen compounds	Carbohydrates and carbohydrate conjugates	HMDB0060493	N-Acetylmuramate								MNLRQHMNZILYPY-MKFCKLDKSA-N	C11H19NO8	1	M+H	294.116		8.51	8.51	64.0541	7.88636	100	100	-0.356847	0.00355077	0.00717568	-0.187119	0.240624	0.299964	-0.48302	0.0938752	0.190656	-0.173365	0.156589	0.167543	-0.160555	0.0148723	0.0251411
Guanidoacetic acid --- Indole	Amino acids, peptides, and analogues --- Indoles and derivatives	HILIC_NegMS1_34	RT_1		nonGL	Glycocyamine; LC-ESI-QTOF; MS2; CE M-H MassBank --- Guanidinoacetic acid M-H FiehnHILIC --- Guanidoacetic acid M-H HMDB --- Indole M-H HMDB	Organic acids and derivatives --- Organoheterocyclic compounds	Carboxylic acids and derivatives --- Indoles and derivatives	Amino acids, peptides, and analogues --- Indoles	HMDB0000128, HMDB0000738	Guanidoacetic acid --- Indole								BPMFZUMJYQTVII-UHFFFAOYSA-N, SIKJAQJRHWYJAI-UHFFFAOYSA-N	C3H7N3O2, C8H7N	1	M-H	116.051		8.11	8.1	47.6965	28.1773	56.7797	100	-0.346505	0.00365929	0.00737	-0.30967	0.0445466	0.0990097	-0.462428	0.0997178	0.199156	-0.237478	0.0451003	0.078238	-0.177996	0.00532878	0.0110672
Cer 39:1;O2	Cer	RP_NegMSMS_267		Y	nonGL	Cer 16:1;2O/23:0 M+HCOO Atlas --- Cer 17:1;2O/22:0 M+HCOO Atlas --- Cer 18:1;2O/21:0 M+HCOO Atlas	Lipids and lipid-like molecules	Sphingolipids	Ceramides	HMDB0249814	Cer(d16:1/23:0)	Sphingolipids [SP]	Ceramides [SP02]	N-acylsphingosines (ceramides) [SP0201]	LMSP02010017 --- LMSP02010121	Cer(d16:1/23:0) --- Cer(d18:1/21:0)	Cer 39:1;O2	Cer 16:1;O2/23:0 --- Cer 18:1;O2/21:0	FWXJRGLCUAXNLA-NWBJSICCNA-N, NHEGYDMEFDPAEY-NWBJSICCNA-N, WYSRACVJQVNCRW-NWBJSICCNA-N	C39H77NO3	2	M+HCOO	652.588	606.58	7.99	7.96	29.6496	9.22308	87.5	100	-0.346972	0.00369352	0.0074139	-0.526461	0.000489912	0.00286805	-0.474231	0.0919933	0.188963	-0.221356	0.062819	0.0967502	-0.216779	0.000617973	0.00176273
Phenylacetaldehyde	Xenobiotics	HILIC_PosMSMS_63			nonGL	Phenylacetaldehyde M+H-H2O NIST	Benzenoids	Benzene and substituted derivatives	Phenylacetaldehydes	HMDB0006236	Phenylacetaldehyde								DTUQWGWMVIHBKE-UHFFFAOYSA-N	C8H8O	1	M+H-H2O	103.054		10.18	10.19	99.7297	4.23113	100	100	-0.347145	0.00375241	0.00749373	-0.084694	0.588367	0.471608	-0.555455	0.0482298	0.121198	-0.13713	0.253005	0.224656	-0.143671	0.0263269	0.0405192
Quinolinic acid	Pyridines and derivatives	HILIC_NegMSMS_185	RT_1		nonGL	Quinolinic acid M-H HMDB	Organoheterocyclic compounds	Pyridines and derivatives	Pyridinecarboxylic acids and derivatives	HMDB0000232	Quinolinic acid								GJAWHXHKYYXBSV-UHFFFAOYSA-N	C7H5NO4	1	M-H	166.018		9.73	9.71	72.8997	11.2703	96.6102	100	0.343475	0.00375843	0.00749373	0.389391	0.0104813	0.0336876	0.702142	0.0110347	0.0452037	0.367658	0.00149969	0.00724316	0.203867	0.00121531	0.00310951
PI 32:1	PI	HILIC_NegMS1_1378		Y	nonGL	PI 10:0_22:1 M-H Atlas --- PI 11:0_21:1 M-H Atlas --- PI 12:0_20:1 M-H Atlas --- PI 13:0_19:1 M-H Atlas --- PI 14:0_18:1 M-H Atlas --- PI 15:0_17:1 M-H Atlas --- PI 16:0_16:1 M-H Atlas --- PI 17:0_15:1 M-H Atlas --- PI 18:0_14:1 M-H Atlas --- PI 19:0_13:1 M-H Atlas --- PI 6:0_26:1 M-H Atlas --- PI 8:0_24:1 M-H Atlas --- PMeOH 22:5_22:6 M-H Atlas	Lipids and lipid-like molecules	Glycerophospholipids	Glycerophosphoinositols	HMDB0009779	PI(16:0/16:1(9Z))	Glycerophospholipids [GP]	Glycerophosphoinositols [GP06]	Diacylglycerophosphoinositols [GP0601]	LMGP06010027 --- LMGP06010050 --- LMGP06010111 --- LMGP06010196 --- LMGP06010277 --- LMGP06010881 --- LMGP06010960	PI(12:0/20:1(11Z)) --- PI(13:0/19:1(9Z)) --- PI(14:0/18:1(9Z)) --- PI(15:0/17:1(9Z)) --- PI(16:0/16:1(9Z)) --- PI(17:0/15:1(9Z)) --- PI(18:0/14:1(9Z))	PI 32:1	PI 12:0_20:1 --- PI 13:0_19:1 --- PI 14:0_18:1 --- PI 14:1_18:0 --- PI 15:0_17:1 --- PI 15:1_17:0 --- PI 16:0_16:1	BULMMLBXUWTYIM-PFONDFGANA-N, BYMPXXIMCOADAJ-BENRWUELNA-N, DTJJTFMDHAUPET-NXVVXOECNA-N, GBOLMXKIBIRCIT-ICFOKQHNNA-N, IQWCOIUQPOWEBD-NXVVXOECNA-N, JAVDLOQFOQZXOB-PFONDFGANA-N, JLGOXIPEFGVEDZ-ZCXUNETKNA-N, KNFZSKCDYQXLOZ-MSUUIHNZNA-N, MPFAQJGPDDXGFP-OWBHPGMINA-N, QAWXBJDYTIBLRK-PEZBUJJGNA-N, SEWGNFSXDLWWSL-MSUUIHNZNA-N, TUTGRPQTZNQHAV-XPTQMGEGNA-N, URKMQCASNHPHQI-NTMALXAHNA-N	C41H77O13P	1	M-H	807.5		9.1	9.18	57.4526	7.03346	77.9661	100	0.352636	0.00381008	0.00757139	0.305288	0.0528189	0.110166	0.614477	0.0313758	0.0904862	0.306619	0.0107898	0.0295027	0.187071	0.00411166	0.00897879
Hydroxycotinine	Pyridines and derivatives	HILIC_PosMS1_470			nonGL	Hydroxycotinine M+H HMDB	Organoheterocyclic compounds	Pyridines and derivatives	Pyrrolidinylpyridines	HMDB0001390	Hydroxycotinine								XOKCJXZZNAUIQN-IENPIDJESA-N	C10H12N2O2	1	M+H	193.097		9.82	9.81	64.0541	5.35316	100	100	-0.351131	0.00384745	0.00762025	-0.370998	0.0176189	0.0511158	-0.584632	0.0401711	0.10807	-0.290216	0.0156732	0.037849	-0.196577	0.00241824	0.00558782
15-Ketoiloprost	Xenobiotics	RP_NegMSMS_23	RT_2		nonGL	15-Ketoiloprost M-H-H2O NIST													LDICATDQJSBQOX-QRWAJORESA-N	C22H30O4	2	M-H-H2O	339.201	197.025	3.97	3.94	87.6011	27.2082	89.1667	100	-0.347981	0.00396114	0.00781945	-0.157347	0.317577	0.353525	-0.388176	0.173364	0.281419	-0.0879519	0.46804	0.318678	-0.147751	0.0233585	0.0368398
N-Acetylaspartylglutamic acid	Amino acids, peptides, and analogues	HILIC_NegMS1_589	RT_2		nonGL	N-Acetylaspartylglutamic acid M-H FiehnHILIC --- N-Acetylaspartylglutamic acid M-H HMDB --- N-Acetylaspartylglutamic acid M-H NIST	Organic acids and derivatives	Carboxylic acids and derivatives	Amino acids, peptides, and analogues	HMDB0001067	N-Acetylaspartylglutamic acid								OPVPGKGADVGKTG-BQBZGAKWSA-N, OPVPGKGADVGKTG-UHFFFAOYNA-N	C11H16N2O8	1	M-H	303.085		10.61	10.61	63.9566	10.7483	100	100	-0.355013	0.00417339	0.00821125	-0.308301	0.0543842	0.112486	-0.433986	0.137453	0.245909	-0.188528	0.127469	0.150742	-0.178674	0.00716796	0.0140107
1-O-Hexadecyl-2-O-(2E-butenoyl)-sn-glyceryl-3-phosphocholine	Other lipids	RP_PosMSMS_437		Y	nonGL	1-O-Hexadecyl-2-O-(2E-butenoyl)-sn-glyceryl-3-phosphocholine M+H NIST													SRZBVCCSIMMDOV-QPSGOUHRSA-N	C28H56NO7P	1	M+H	550.384		3.42	3.43	64.7849	19.9151	92.562	100	-0.351275	0.00428811	0.00840921	-0.309279	0.0517418	0.109437	-0.223497	0.442899	0.460785	-0.170391	0.165558	0.173195	-0.166576	0.0117349	0.0210719
TAG 55:10	TAG	RP_PosMS1_1337		Y	GL	DGGA 15:0_27:0 M+NH4 Atlas --- DGGA 16:0_26:0 M+NH4 Atlas --- DGGA 17:0_25:0 M+NH4 Atlas --- DGGA 18:0_24:0 M+NH4 Atlas --- DGGA 19:0_23:0 M+NH4 Atlas --- DGGA 20:0_22:0 M+NH4 Atlas --- DGGA 21:0_21:0 M+NH4 Atlas --- TG 10:0_13:1_32:9 M+NH4 Atlas --- TG 11:0_16:3_28:7 M+NH4 Atlas --- TG 11:0_16:4_28:6 M+NH4 Atlas --- TG 11:0_18:3_26:7 M+NH4 Atlas --- TG 11:0_18:4_26:6 M+NH4 Atlas --- TG 11:0_18:5…	Lipids and lipid-like molecules	Glycerolipids	Triradylcglycerols	HMDB0043683, HMDB0043739	TG(15:0/18:4(6Z,9Z,12Z,15Z)/22:6(4Z,7Z,10Z,13Z,16Z,19Z)) --- TG(15:0/20:5(5Z,8Z,11Z,14Z,17Z)/20:5(5Z,8Z,11Z,14Z,17Z))	Glycerolipids [GL]	Triradylglycerols [GL03]	Triacylglycerols [GL0301]	LMGL03010746 --- LMGL03012918 --- LMGL03014107 --- LMGL03015235 --- LMGL03015570 --- LMGL03015585 --- LMGL03016024	TG(13:0/20:5(5Z,8Z,11Z,14Z,17Z)/22:5(7Z,10Z,13Z,16Z,19Z))[iso6] --- TG(15:0/18:4(6Z,9Z,12Z,15Z)/22:6(4Z,7Z,10Z,13Z,16Z,19Z))[iso6] --- TG(15:0/20:5(5Z,8Z,11Z,14Z,17Z)/20:5(5Z,8Z,11Z,14Z,17Z))[iso3] --- TG(15:1(9Z)/18:3(9Z,12Z,15Z)/22:6(4Z,7Z,10Z,13Z,16Z,19Z))[iso6] --- TG(15:1(9Z)/18:4(6Z,9Z,12Z,15Z)/22:5(7Z,10Z,13Z,16Z,19Z))[iso6] --- TG(17:1(9Z)/18:4(6Z,9Z,12Z,15Z)/20:5(5Z,8Z,11Z,14Z,17Z))[iso6…	TG 55:10	TG 13:0_20:5_22:5 --- TG 15:0_18:4_22:6 --- TG 15:0_20:5_20:5 --- TG 15:1_18:3_22:6 --- TG 15:1_18:4_22:5 --- TG 17:1_18:4_20:5 --- TG 17:2_18:3_20:5	AONLVBPDEJXUSZ-FVPWRIEQNA-N, APEFIEPVANKKAU-XTQULDBINA-N, ASHOAAAIVOYOHU-SDRAIUKUNA-N, AXFQNSITNSDDJO-SDFMNNIDNA-N, BBYSGUCNDLVYLR-IUVGNZPTNA-N, BGNBUZLKTGQBNC-QNASFEOMNA-N, BHZRDORMXPOVDH-ZNMRTMOUNA-N, BNWLWXOONZPFOB-DBWZNHQFNA-N, BUXDUTPLXBKQNK-LCQPGIAINA-N, CAICYWGWROITDJ-VNTDCCHZNA-N, COFHQKMQZVBXOA-YEGXZIOQNA-N, COURCTKQFVOBMZ-SCDQLKOUNA-N, COYLYHDCONLGTP-MBQMNJGKNA-N, CRDACMCTWDEWNA-SPXVZEO…	C58H92O6	1	M+NH4	902.723		10.45	10.44	95.6989	3.31908	100	100	0.340653	0.0043333	0.00846997	0.248784	0.108214	0.18109	0.225773	0.424571	0.450185	0.0267957	0.823215	0.427439	0.15305	0.0172973	0.0281748
Cer 42:1;O2	Cer	RP_Pos, RP_NegMSMS_590, 264, 314		Y	nonGL	Cer 18:1;2O/24:0 M+H Atlas --- N-Nervonoyl-D-erythro-sphinganine M+H NIST, Cer 18:1;2O/24:0 M-H Atlas, Cer 18:1;2O/24:0 M+HCOO Atlas	Lipids and lipid-like molecules	Sphingolipids	Ceramides	HMDB0011769, HMDB0004956	Cer(d18:1/24:0) --- Cer(d18:0/24:1(15Z))	Sphingolipids [SP]	Ceramides [SP02]	N-acylsphinganines (dihydroceramides) [SP0202], N-acylsphingosines (ceramides) [SP0201]	LMSP02020011, LMSP02010012	Cer(d18:0/24:1(15Z)), Cer(d18:1/24:0)	Cer 42:1;O2	Cer 18:0;O2/24:1, Cer 18:1;O2/24:0	YUULKFVZRXQHPM-ATHUGRIKSA-N, ZJVVOYPTFQEGPH-MHAUTQJVNA-N, ZJVVOYPTFQEGPH-MHAUTQJVNA-N	C42H83NO3	1, 2	M+H, M-H, M+HCOO	650.6403, 648.6296, 694.6355	392.3846, 392.387	8.84	8.8	90.8356	9.05699	100	100	-0.341567	0.00439644	0.0085653	-0.377989	0.0141257	0.0434827	-0.51086	0.0698577	0.158538	-0.295196	0.0126231	0.0326173	-0.191143	0.0028119	0.00642277
Cer 40:1;O2	Cer	RP_Pos, RP_NegMSMS_543, 238, 283		Y	nonGL	Cer 18:1;2O/22:0 M+H Atlas --- N-Behenoyl-D-erythro-sphingosine M+H NIST, Cer 18:1;2O/22:0 M-H Atlas, Cer 18:1;2O/22:0 M+HCOO Atlas	Lipids and lipid-like molecules	Sphingolipids	Ceramides	HMDB0004952	Cer(d18:1/22:0)	Sphingolipids [SP]	Ceramides [SP02]	N-acylsphingosines (ceramides) [SP0201]	LMSP02010008	Cer(d18:1/22:0)	Cer 40:1;O2	Cer 18:1;O2/22:0	KEPQASGDXIEOIL-GLQCRSEXSA-N, KEPQASGDXIEOIL-LAPDZXRHNA-N, KEPQASGDXIEOIL-LAPDZXRHNA-N	C40H79NO3	1, 2	M+H, M-H, M+HCOO	622.6094, 620.5985, 666.6042	364.3558, 620.5912	8.29	8.25	70.8895	12.8469	100	100	-0.341706	0.00485043	0.009419	-0.514359	0.000803282	0.00424749	-0.749078	0.00787572	0.0337993	-0.270038	0.0244936	0.0512468	-0.227777	0.000373303	0.00114127
N-Acetylhistidine	Amino acids, peptides, and analogues	HILIC_PosMS1_487	RT_1		nonGL	N-Acetylhistidine M+H FiehnHILIC --- N-Acetylhistidine M+H HMDB	Organic acids and derivatives	Carboxylic acids and derivatives	Amino acids, peptides, and analogues	HMDB0032055	N-Acetylhistidine								KBOJOGQFRVVWBH-UHFFFAOYNA-N, KBOJOGQFRVVWBH-ZETCQYMHSA-N	C8H11N3O3	1	M+H	198.085		14.82	14.81	67.2973	17.6716	97.479	100	0.340492	0.00487005	0.00942639	0.178657	0.256189	0.310113	0.220039	0.442027	0.460785	0.0753049	0.534661	0.341118	0.1404	0.0314776	0.0472687
FA 4:0;O	FA - Fatty Acids and Conjugates	HILIC_NegMSMS_17		Y	nonGL	2-Hydroxybutyric acid M-H HMDB --- 2-Hydroxyisobutyric acid M-H FiehnHILIC --- 3-Hydroxybutyric acid M-H FiehnHILIC --- alpha-Hydroxyisobutyric acid M-H HMDB	Organic acids and derivatives	Hydroxy acids and derivatives	Alpha hydroxy acids and derivatives	HMDB0000008, HMDB0000729	2-Hydroxybutyric acid --- alpha-Hydroxyisobutyric acid	Fatty Acyls [FA]	Fatty Acids and Conjugates [FA01]	Hydroxy fatty acids [FA0105]	LMFA01050342 --- LMFA01050417	2S-Hydroxybutanoic acid --- alpha-hydroxy-isobutyric acid	FA 4:0;O		AFENDNXGAFYKQO-VKHMYHEASA-N, BWLBGMIXKSTLSX-UHFFFAOYSA-N, WHBMMWSBFZVSSR-UHFFFAOYNA-N	C4H8O3	1	M-H	103.04		2.89	2.89	94.3089	4.30896	83.0508	100	0.341233	0.00503126	0.00970692	0.265055	0.0925161	0.165627	0.4924	0.0850464	0.178767	0.190811	0.115571	0.140172	0.170258	0.00906566	0.0167317
4-Aminohippuric acid	Amino acids, peptides, and analogues	HILIC_PosMS1_410	RT_4		nonGL	2-[(4-Aminobenzoyl)amino]acetic acid M+H-H2O NIST --- Allantoic acid M+H FiehnHILIC --- Allantoic acid M+H HMDB --- Allantoic acid M+H NIST --- Pemoline M+H FiehnHILIC --- Pemoline M+H HMDB	Benzenoids	Benzene and substituted derivatives	Benzoic acids and derivatives	HMDB0001867	4-Aminohippuric acid								HSMNQINEKMPTIC-UHFFFAOYSA-N, NRNCYVBFPDDJNE-UHFFFAOYNA-N, NRNCYVBFPDDJNE-UHFFFAOYSA-N, NUCLJNSWZCHRKL-UHFFFAOYSA-N	C4H8N4O4, C9H10N2O3, C9H8N2O2	1	M+H --- M+H-H2O	177.07		10.6	10.59	15.6757	26.0501	41.1765	100	-0.338835	0.0051173	0.00984106	-0.277601	0.0762891	0.144779	-0.895819	0.00130169	0.0089381	-0.226001	0.06022	0.0954628	-0.193241	0.00274068	0.00628417
PE 38:5	PE	RP_Pos, RP_NegMSMS_901, 449		Y	nonGL	PC 17:2_18:3 M+H Atlas --- PC 33:2 M+Na Atlas --- PE 18:1_20:4 M+H Atlas --- PE 20:0_18:5 M+H Atlas, PE 18:1_20:4 M-H Atlas	Lipids and lipid-like molecules	Glycerophospholipids	Glycerophosphoethanolamines	HMDB0009070	PE(18:1(9Z)/20:4(8Z,11Z,14Z,17Z))	Glycerophospholipids [GP]	Glycerophosphocholines [GP01]	Diacylglycerophosphocholines [GP0101]	LMGP01011565	PC(17:2(9Z,12Z)/18:3(9Z,12Z,15Z))	PC 35:5	PC 17:2_18:3	AIIVRGFXFCHAQG-OHNCOSGTNA-N, ISRXFUSSZHWGNX-MJXYYAAPNA-N, JUSPAMGHWOKAGR-DTMTYYGTNA-N, ONRFINYAKAREDB-LTXDKZCQNA-N, ZYMZKMQPPJPQHY-HAGCXRLMNA-N, ZYMZKMQPPJPQHY-HAGCXRLMNA-N	C43H76NO8P	1, 2	M+H --- M+Na, M-H	766.5334, 764.5226	329.247	5.915	5.885	93.0108	9.74336	98.3471	100	-0.343732	0.00515929	0.00988992	-0.261668	0.10027	0.173011	-0.598078	0.0376385	0.104372	-0.182251	0.13705	0.156004	-0.176002	0.00751473	0.0144983
PC 34:3;O	OxPC	RP_NegMSMS_591		Y	nonGL	PC 16:0_18:3;O M+HCOO Atlas				HMDB0285985	PC(16:0/18:3(9,11,15)-OH(13))								XNMRFFRAJXHEBK-GEUDNWMBNA-N	C42H78NO9P	2	M+HCOO	816.54	293.21	4.35	4.39	15.903	21.816	49.1667	100	-0.34602	0.00517898	0.00989584	-0.416089	0.00863638	0.0288909	-0.301759	0.302138	0.380522	-0.271337	0.0267611	0.054245	-0.187971	0.00447888	0.00955041
LPE 16:0	LPE	RP_Pos, RP_NegMS1, MSMS_282, 302, 328, 363, 103		Y	nonGL	1-Palmitoyl-2-hydroxy-sn-glycero-3-phosphoethanolamine M+H-H2O NIST --- CerP 19:1;2O/2:0 M+H Atlas --- LPE O-16:2 M+H Atlas, 1-Palmitoyl-2-hydroxy-sn-glycero-3-phosphoethanolamine M+H NIST --- LPE 16:0 M+H Atlas --- LysoPE(16:0/0:0) M+H HMDB, 1-Hexadecanoyl-sn-glycero-3-phosphoethanolamine M+Na NIST --- 1-Palmitoyl-2-hydroxy-sn-glycero-3-phosphoethanolamine M+Na NIST, 1-Palmitoyl-2-hydroxy-sn-gly…	Lipids and lipid-like molecules	Glycerophospholipids	Glycerophosphoethanolamines	HMDB0011503, HMDB0256030	LysoPE(16:0/0:0) --- [3-[2-Aminoethoxy(hydroxy)phosphoryl]oxy-2-hydroxypropyl] hexadecanoate	Glycerophospholipids [GP]	Glycerophosphoethanolamines [GP02]	Monoacylglycerophosphoethanolamines [GP0205]	LMGP02050002	PE(16:0/0:0)	LPE 16:0	LPE 16:0	CBCUHLIURDBHIN-IVDRKEIJSA-N, YNYLMBNSQWIMMP-UTOQUPLUNA-N, YVYMBNSKXOXSKW-HXUWFJFHSA-N, YVYMBNSKXOXSKW-HXUWFJFHSA-N, YVYMBNSKXOXSKW-UHFFFAOYNA-N, YVYMBNSKXOXSKW-HXUWFJFHSA-N, YVYMBNSKXOXSKW-UHFFFAOYSA-N, FWWJVUFXUQOEDM-UHFFFAOYSA-N, YHRCLOURJWJABF-UHFFFAOYSA-N, YVYMBNSKXOXSKW-HXUWFJFHSA-N	C21H44NO7P	1, 2	M+H --- M+H-H2O, M+H, M+Na, M+H --- M-H+2Na, M-H	436.2807, 454.2912, 476.2735, 498.2549, 452.2784	255.224	2.92	2.91	69.8113	11.9713	100	100	-0.338143	0.00527829	0.0100534	-0.174246	0.269134	0.317265	-0.153402	0.593026	0.527217	-0.102499	0.39851	0.291719	-0.135409	0.0385963	0.0557132
PE 27:1	PE	RP_PosMS1_534		Y	nonGL	NAGlySer 16:4/13:1 M+NH4 Atlas --- NAGlySer 18:5/11:0 M+NH4 Atlas --- PC 10:0_14:1 M+H Atlas --- PC 11:0_13:1 M+H Atlas --- PC 8:0_16:1 M+H Atlas --- PC 9:0_15:1 M+H Atlas --- PE 10:0_17:1 M+H Atlas --- PE 11:0_16:1 M+H Atlas --- PE 12:0_15:1 M+H Atlas --- PE 13:0_14:1 M+H Atlas --- PE 14:0_13:1 M+H Atlas --- PE 8:0_19:1 M+H Atlas --- PE 9:0_18:1 M+H Atlas --- PEtOH 13:1_14:1 M+NH4 Atlas --- PMeO…						Glycerophospholipids [GP]	Glycerophosphoethanolamines [GP02]	Diacylglycerophosphoethanolamines [GP0201]	LMGP02010361 --- LMGP02010383	PE(12:0/15:1(9Z)) --- PE(13:0/14:1(9Z))	PE 27:1	PE 12:0_15:1 --- PE 13:0_14:1	ACZXGAKQGDUSDK-BENRWUELNA-N, BJAUEVLAIJBLLG-OWBHPGMINA-N, BKZGDCNIGKJTGE-NTMALXAHNA-N, CHPWQEDDSHJDKM-MIMPSMLTNA-N, IIQCZSRLQPVHEQ-PFONDFGANA-N, LGTIALIAXWQKJN-YPKPFQOONA-N, MBWNQWVMGMSNCS-YPKPFQOONA-N, NUDNYGRPZVIXGA-JDWHMZLXNA-N, NXROMQCNIJYHBX-YJKQCFOZNA-N, OTZSFCSEPJGJCV-CDPSVIDWNA-N, QSIOCJXJDVEDSJ-VRFDNOBANA-N, SYVVHHLOEIRCQF-LUAWRHEFNA-N, VQGXFEKTHHNCIU-PFONDFGANA-N, WCPOOGLRLZREQT-QBFSEMI…	C32H62NO8P	1	M+H --- M+NH4	620.425		3.64	3.65	20.1613	25.9131	55.3719	100	-0.346935	0.00529736	0.0100576	-0.308468	0.0549395	0.113277	-0.115807	0.69436	0.559982	-0.281297	0.0222193	0.0480445	-0.159462	0.0171888	0.0281519
Hydroxyurea	Carboximidic acids and derivatives	HILIC_PosMS1_20	RT_3		nonGL	Hydroxyurea M+H NIST	Organic acids and derivatives	Carboximidic acids and derivatives		HMDB0015140	Hydroxyurea								VSNHCAURESNICA-UHFFFAOYSA-N	CH4N2O2	1	M+H	77.0382		10.18	10.19	99.7297	4.86325	100	100	-0.336106	0.00536659	0.0101567	-0.10585	0.501176	0.438142	-0.690185	0.0141101	0.0527107	-0.116959	0.333012	0.26558	-0.151395	0.0198071	0.031828
PE O-36:4	PE-O	RP_NegMSMS_362		Y	nonGL	PE O-18:2_18:2 M-H Atlas													CVFFRLVFXKZVIJ-MAZCIEHSNA-N	C41H76NO7P	2	M-H	724.523	303.233	6.34	6.16	32.0755	7.07752	70	100	-0.333592	0.00544974	0.0102814	-0.252044	0.105022	0.177761	-0.406143	0.150863	0.264006	0.139787	0.243966	0.218243	-0.161201	0.0123789	0.0217693
TAG 60:11	TAG	RP_PosMSMS_1481, 1490		Y	GL	TG 18:1_20:4_22:6 M+NH4 Atlas, TG 16:0_22:5_22:6 M+Na Atlas --- TG 18:1_20:4_22:6 M+Na Atlas	Lipids and lipid-like molecules	Glycerolipids	Triradylcglycerols	HMDB0050219, HMDB0044611	TG(16:0/22:5(7Z,10Z,13Z,16Z,19Z)/22:6(4Z,7Z,10Z,13Z,16Z,19Z)) --- TG(18:1(9Z)/20:4(8Z,11Z,14Z,17Z)/22:6(4Z,7Z,10Z,13Z,16Z,19Z))	Glycerolipids [GL]	Triradylglycerols [GL03]	Triacylglycerols [GL0301]	LMGL03012086	TG(16:0/22:5(7Z,10Z,13Z,16Z,19Z)/22:6(4Z,7Z,10Z,13Z,16Z,19Z))[iso6]	TG 60:11	TG 16:0_22:5_22:6	YDCWNPRKDZMBHL-HLTHBUFLNA-N, QVOHTEKWCOOZBV-JTUQIUDNNA-N, YDCWNPRKDZMBHL-HLTHBUFLNA-N	C63H100O6	1	M+NH4, M+Na	970.7794, 975.7357		10.355	10.325	72.5806	6.20391	76.8595	100	-0.341722	0.00552592	0.0103922	-0.250134	0.117064	0.189988	-0.685561	0.0169435	0.0601775	-0.184634	0.132619	0.153006	-0.17806	0.00691907	0.0136134
TAG 60:12	TAG	RP_PosMSMS_1477, 1486		Y	GL	TG 16:0_22:6_22:6 M+NH4 Atlas --- TG 18:2_20:4_22:6 M+NH4 Atlas --- TG 20:4_20:4_20:4 M+NH4 Atlas, TG 16:0_22:6_22:6 M+Na Atlas --- TG 18:2_20:4_22:6 M+Na Atlas --- TG 20:4_20:4_20:4 M+Na Atlas	Lipids and lipid-like molecules	Glycerolipids	Triradylcglycerols	HMDB0055661	TG(20:4(8Z,11Z,14Z,17Z)/20:4(8Z,11Z,14Z,17Z)/20:4(8Z,11Z,14Z,17Z))								SSTFWICCEAKSBO-ZHKGMDDBSA-N, VLEDHTUUVAXNOJ-QPPLYHLQNA-N, VVQOCJRHOCGAET-FTSCXLDQNA-N	C63H98O6	1	M+NH4, M+Na	968.7635, 973.7198		10.1	10.08	77.957	2.818	93.3884	100	-0.342275	0.00563102	0.0105566	-0.259963	0.104469	0.177761	-0.727017	0.0114778	0.0457729	-0.229793	0.0613047	0.0958301	-0.182148	0.00587441	0.0119525
PE O-34:1	PE-O	RP_NegMSMS_326		Y	nonGL	PE O-18:1_16:0 M-H Atlas													KJDVLWWPMOBWGU-ZCXUNETKNA-N	C39H78NO7P	2	M-H	702.543	255.231	7.08	6.71	9.16442	6.94924	28.3333	100	-0.336619	0.00567808	0.0106114	-0.366611	0.0190336	0.0547358	-0.456174	0.110994	0.212268	-0.161113	0.184773	0.185414	-0.184822	0.00446304	0.00955041
2',3'-Di-O-acetyladenosine	Xenobiotics	HILIC_PosMSMS_1212			nonGL	2',3'-Di-O-acetyladenosine M+H NIST													OUQFHKYWNKYTTQ-UHFFFAOYSA-N	C14H17N5O6	1	M+H	352.126		6.21	6.3	40.8108	26.3361	60.5042	100	-0.340398	0.00583591	0.0108723	-0.419503	0.00788742	0.0270762	-0.235731	0.419349	0.446862	-0.199189	0.105148	0.13417	-0.183449	0.00544425	0.0112306
Cer 30:1;O2	Cer	RP_PosMS1_315		Y	nonGL	N-(Dodecanoyl)-sphing-4-enine M+H-H2O NIST	Lipids and lipid-like molecules	Sphingolipids	Ceramides	HMDB0004947	Cer(d18:1/12:0)	Sphingolipids [SP]	Ceramides [SP02]	N-acylsphingosines (ceramides) [SP0201]	LMSP02010002	Cer(d18:1/12:0)	Cer 30:1;O2	Cer 18:1;O2/12:0	HXFPPRPLRSPNIB-VARSQMIESA-N	C30H59NO3	1	M+H-H2O	464.442		5.12	5.1	30.914	12.1452	94.2149	100	-0.306482	0.00598229	0.0110415	-0.409002	0.00399131	0.0159093	-0.550423	0.0347633	0.0990667	-0.167298	0.132125	0.153006	-0.188656	0.00143505	0.00362508
Methionine sulfoxide	Amino acids, peptides, and analogues	HILIC_NegMS1_175	RT_3		nonGL	Methioninesulfoxide M-H FiehnHILIC	Organic acids and derivatives	Carboxylic acids and derivatives	Amino acids, peptides, and analogues	HMDB0002005	Methionine sulfoxide								QEFRNWWLZKMPFJ-UHFFFAOYNA-N	C5H11NO3S	1	M-H	164.04		13.98	13.93	36.3144	7.90237	87.2881	100	0.338454	0.0059636	0.0110415	0.278478	0.0801977	0.149568	0.28781	0.322121	0.393635	0.262112	0.031441	0.0610839	0.160931	0.0149379	0.0251564
PE 38:4	PE	RP_Pos, RP_NegMSMS_912, 453		Y	nonGL	1-Octadecanoyl-2-(5Z,8Z,11Z,14Z-eicosatetraenoyl)-sn-glycero-3-phosphoethanolamine M+H NIST --- 1-Stearoyl-2-oleoyl-sn-glycero-3-phosphoethanolamine M+Na NIST, 1-Octadecanoyl-2-(5Z,8Z,11Z,14Z-eicosatetraenoyl)-sn-glycero-3-phosphoethanolamine M-H NIST --- PE 18:0_20:4 M-H Atlas	Lipids and lipid-like molecules	Glycerophospholipids	Glycerophosphoethanolamines	HMDB0008993, HMDB0009003	PE(18:0/18:1(9Z)) --- PE(18:0/20:4(5Z,8Z,11Z,14Z))	Glycerophospholipids [GP]	Glycerophosphoethanolamines [GP02]	Diacylglycerophosphoethanolamines [GP0201]	LMGP02010036 --- LMGP02010118, LMGP02010118	PE(18:0/18:1(9Z)) --- PE(18:0/20:4(5Z,8Z,11Z,14Z)), PE(18:0/20:4(5Z,8Z,11Z,14Z))	PE 36:1 --- PE 38:4, PE 38:4	PE 18:0_18:1 --- PE 18:0_20:4, PE 18:0_20:4	ANRKEHNWXKCXDB-BHFWLYLHSA-N, JQKOHRZNEOQNJE-DJEJVYNPSA-N, ANRKEHNWXKCXDB-BHFWLYLHSA-N, YEHAZLUVAZKVRO-ZKVKLVECNA-N	C41H80NO8P, C43H78NO8P, C43H78NO8P	2	M+H --- M+Na, M-H	768.55, 766.5396	627.5403, 303.2306	6.5	6.45	92.2043	3.31036	100	100	-0.341841	0.00597459	0.0110415	-0.299848	0.0619023	0.123743	-0.470404	0.10756	0.209028	-0.134764	0.278245	0.23886	-0.175364	0.00846784	0.0158748
SM 42:1;O2	SM	RP_Neg, RP_PosMSMS_686, 1146, 1076		Y	nonGL	SM 37:1;2O/5:0 M+HCOO Atlas, SM 42:1;2O M+Na Atlas, SM 18:1;2O/24:0 M+H Atlas --- SM 37:1;2O/5:0 M+H Atlas	Lipids and lipid-like molecules	Sphingolipids	Phosphosphingolipids	HMDB0011697	SM(d18:1/24:0)	Sphingolipids [SP]	Phosphosphingolipids [SP03]	Ceramide phosphocholines (sphingomyelins) [SP0301]	LMSP03010008	SM(d18:1/24:0)	SM 42:1;O2	SM 18:1;O2/24:0	DMTOYHSQEYBHSO-XQQUEIPINA-N, XMLLINSHRHLMER-ZCXUNETKNA-N, DMTOYHSQEYBHSO-XQQUEIPINA-N, QEDPUVGSSDPBMD-OGSMZCTINA-N	C47H95N2O6P	2, 1	M+HCOO, M+Na, M+H	859.6912, 837.6774, 815.6949	168.042	8.23	8.22	90.0538	4.7211	100	100	-0.32948	0.00612661	0.011273	-0.419202	0.00631793	0.0226365	-0.157908	0.578733	0.522282	-0.376189	0.00131213	0.00671375	-0.176133	0.00614113	0.0123723
Cer 42:2;O2	Cer	RP_Pos, RP_NegMSMS_584, 312		Y	nonGL	Cer 18:1;2O/24:1 M+H Atlas, Cer 18:1;2O/24:1 M+HCOO Atlas													HZPUWSUHFOTSAY-AKTWBEBINA-N	C42H81NO3	1, 2	M+H, M+HCOO	648.624, 692.6198	390.369	8.32	8.25	88.4097	6.54543	98.3471	100	-0.312963	0.00633113	0.0116134	-0.218354	0.141665	0.214768	-0.479836	0.0744072	0.166088	-0.292994	0.00936129	0.0276445	-0.153316	0.0126868	0.0220653
Cadaverine	Amines	HILIC_PosMSMS_37	RT_2		nonGL	1,5-Pentanediamine M+H-NH3 NIST	Organic nitrogen compounds	Organonitrogen compounds	Amines	HMDB0002322	Cadaverine								VHRGRCVQAFMJIZ-UHFFFAOYSA-N	C5H14N2	1	M+H-NH3	86.0962		10.52	10.54	100	2.92716	100	100	-0.332167	0.00639157	0.0116867	-0.154607	0.32908	0.362635	-0.432237	0.131391	0.241046	-0.244838	0.0425109	0.0749798	-0.145093	0.0269891	0.0412559
PC 40:7	PC	RP_Pos, RP_NegMSMS_1125, 1191, 717		Y	nonGL	PC 18:1_22:6 M+H Atlas --- PC 20:3_20:4 M+H Atlas --- PC 38:4 M+Na Atlas, PC 40:7 M+Na Atlas, PC 18:1_22:6 M+HCOO Atlas	Lipids and lipid-like molecules	Glycerophospholipids	Glycerophosphocholines	HMDB0008123	PC(18:1(9Z)/22:6(4Z,7Z,10Z,13Z,16Z,19Z))	Glycerophospholipids [GP]	Glycerophosphocholines [GP01]	Diacylglycerophosphocholines [GP0101]	LMGP01010913	PC(18:1(9Z)/22:6(4Z,7Z,10Z,13Z,16Z,19Z))	PC 40:7	PC 18:1_22:6	FPEVDFOXMCHLKL-MIIHFGKENA-N, QFOVTMHNARYFIU-HYOAFMAGNA-N, TWXNOZDNXVHOLP-HBZIWDQGNA-N, LXOBZBKBKRYAFP-ZDNAGYMQNA-N, QFOVTMHNARYFIU-HYOAFMAGNA-N, FPEVDFOXMCHLKL-MIIHFGKENA-N	C48H82NO8P	1, 2	M+H --- M+Na, M+Na, M+HCOO	832.579, 854.5635, 876.576	671.4968, 327.2314	5.78	5.77	100	8.29284	100	100	-0.338825	0.00641027	0.0116867	-0.216445	0.17951	0.252034	-0.499572	0.086896	0.181386	-0.298043	0.0150025	0.0365712	-0.161426	0.0156065	0.0261348
Urocanic acid	Organoheterocyclic compounds	HILIC_Neg, HILIC_PosMSMS_88, 207	RT_2		nonGL	4-Imidazoleacrylic acid M-H NIST --- Urocanic acid M-H FiehnHILIC --- Urocanic acid M-H HMDB, 4-Imidazoleacrylic acid M+H NIST --- Urocanic acid M+H HMDB	Organoheterocyclic compounds	Azoles	Imidazoles	HMDB0000301, HMDB0062562	Urocanic acid --- Trans-urocanate								LOIYMIARKYCTBW-OWOJBTEDSA-N, LOIYMIARKYCTBW-UHFFFAOYSA-N, LOIYMIARKYCTBW-OWOJBTEDSA-N	C6H6N2O2	1, 2	M-H, M+H	137.036, 139.0496	93.0435	9.35	9.37	100	5.80091	100	100	-0.332439	0.00643293	0.0116922	-0.314924	0.0452626	0.100261	-0.64426	0.0236131	0.0759588	-0.199621	0.100038	0.128602	-0.184571	0.00459605	0.00971625
5-Aminoimidazole-4-carboxamide	Organoheterocyclic compounds	HILIC_PosMS1_79			nonGL	5-Aminoimidazole-4-carboxamide M+H-NH3 NIST	Organoheterocyclic compounds	Azoles	Imidazoles	HMDB0003192	5-Aminoimidazole-4-carboxamide								DVNYTAVYBRSTGK-UHFFFAOYSA-N	C4H6N4O	1	M+H-NH3	110.034		7.38	7.38	45.9459	14.9829	43.6975	100	-0.333446	0.00656076	0.0118883	-0.245869	0.121676	0.194585	-0.692388	0.0153194	0.0563523	-0.343396	0.00426213	0.015733	-0.175309	0.00756703	0.0145521
L-N5-(1-Imino-3-pentenyl) ornithine	Xenobiotics	HILIC_PosMSMS_486			nonGL	L-N5-(1-Imino-3-pentenyl) ornithine M+H-NH3 NIST													JUSNBVJTFYDFKR-SGJFDWMWSA-N	C10H19N3O2	2	M+H-NH3	197.128	70.064	9.78	9.78	29.4595	17.1671	55.4622	100	-0.337204	0.00670511	0.0121131	-0.409525	0.0100687	0.0326819	-0.641062	0.0272405	0.0822191	-0.316549	0.00965632	0.0280351	-0.202355	0.00221421	0.0052382
SM 43:2;O2	SM	RP_Pos, RP_NegMSMS_1110, 702, 1177		Y	nonGL	SM 37:2;2O/6:0 M+H Atlas, SM 37:2;2O/6:0 M+HCOO Atlas, SM 43:2;2O M+Na Atlas													BTBMWZWQEWRPHP-FCDJCWBJNA-N, HKPROAQUMPEHJM-GJLVVWLQNA-N	C48H95N2O6P	2, 1	M+H, M+HCOO, M+Na	827.6949, 871.6908, 849.6768	184.0723, 811.6661	7.77	7.77	54.9865	6.05301	63.3333	100	-0.328911	0.00734417	0.0132275	-0.286499	0.070498	0.137031	-0.478136	0.0968607	0.195617	-0.148435	0.225267	0.209379	-0.169737	0.00978032	0.0178854
Urea	Ureas	HILIC_PosMSMS_7			nonGL	Urea M+H NIST	Organic acids and derivatives	Organic carbonic acids and derivatives	Ureas	HMDB0000294	Urea								XSQUKJJJFZCRTK-UHFFFAOYSA-N	CH4N2O	2	M+H	61.0396	44.0129	4.25	4.25	100	4.84442	100	100	-0.326592	0.00767903	0.0137889	-0.472029	0.0024004	0.0107799	-0.533522	0.0629621	0.148835	-0.296308	0.0140321	0.0347489	-0.20456	0.00164755	0.00409571
LPA 16:0	LPA	HILIC_NegMSMS_883		Y	nonGL	LPA 16:0 M-H Atlas	Lipids and lipid-like molecules	Glycerophospholipids	Glycerophosphates	HMDB0007853	LysoPA(16:0/0:0)	Glycerophospholipids [GP]	Glycerophosphates [GP10]	Monoacylglycerophosphates [GP1005]	LMGP10050006 --- LMGP10050041	1-palmitoylglycerol 3-phosphate --- PA(16:0/0:0)	LPA 16:0	LPA 16:0	YNDYKPRNFWPPFU-UHFFFAOYNA-N	C19H39O7P	1	M-H	409.234		8.65	8.73	40.6504	24.4883	43.2203	98.9796	0.325663	0.00771818	0.0138176	0.228506	0.148911	0.221738	0.588014	0.0395418	0.107989	0.157663	0.195714	0.192286	0.164484	0.0120456	0.0213723
Adenine	Purines and purine derivatives	HILIC_Pos, HILIC_NegMSMS_188, 75	RT_2		nonGL	Adenine M+H HMDB, Adenine M-H FiehnHILIC --- Adenine M-H HMDB --- Adenine; LC-ESI-QTOF; MS2; CE M-H MassBank	Organoheterocyclic compounds	Imidazopyrimidines	Purines and purine derivatives	HMDB0000034	Adenine								GFFGJBXGBJISGV-UHFFFAOYSA-N	C5H5N5	1	M+H, M-H	136.0613, 134.047		7.98	8.01	90.5405	10.3497	100	100	0.318124	0.00800763	0.0139807	0.0344762	0.825363	0.544339	0.403859	0.152166	0.264999	-0.0796942	0.50658	0.330965	0.118499	0.0675453	0.084378
FAPy-adenine	Pyrimidines and pyrimidine derivatives	HILIC_PosMSMS_290			nonGL	4,6-Diamino-5-formamidopyrimidine M+H NIST	Organoheterocyclic compounds	Diazines	Pyrimidines and pyrimidine derivatives	HMDB0004816	FAPy-adenine								MVYUVUOSXNYQLL-UHFFFAOYSA-N	C5H7N5O	1	M+H	154.072		11.93	11.92	60	13.2337	92.437	100	-0.322211	0.00802034	0.0139807	-0.19014	0.227785	0.291701	-0.0590709	0.837132	0.608428	-0.314882	0.00831837	0.0258965	-0.128621	0.0498277	0.0686034
Glu-Cys	Amino acids, peptides, and analogues	HILIC_NegMS1_375	RT_1		nonGL	.gamma.-Glu-Cys M-H-H2O NIST	Organic acids and derivatives	Carboxylic acids and derivatives	Amino acids, peptides, and analogues	HMDB0001049, HMDB0303807	gamma-Glutamylcysteine --- N-gamma-Glutamylcysteine								RITKHVBHSGLULN-ROLXFIACSA-N	C8H14N2O5S	1	M-H-H2O	231.046		10.32	10.33	63.9566	6.11617	100	100	-0.329882	0.00789251	0.0139807	-0.310201	0.0525831	0.110166	-0.484097	0.0966086	0.195617	-0.124063	0.317091	0.256847	-0.174489	0.00862059	0.0161105
Gly-Trp	Amino acids, peptides, and analogues	HILIC_PosMS1_758	RT_2		nonGL	Gly-Trp M+H NIST --- Imazapyr M+H HMDB	Organic acids and derivatives	Carboxylic acids and derivatives	Amino acids, peptides, and analogues	HMDB0028852	Glycyl-Tryptophan								AJHCSUXXECOXOY-UHFFFAOYSA-N, CLQMBPJKHLGMQK-UHFFFAOYSA-N	C13H15N3O3	1	M+H	262.119		3.7	3.7	64.0541	7.06114	100	100	-0.324939	0.0079057	0.0139807	-0.113175	0.476969	0.426069	0.361775	0.209087	0.313761	-0.282707	0.0190932	0.0432768	-0.0935069	0.158835	0.161314
L-Pipecolic acid	Amino acids, peptides, and analogues	HILIC_PosMSMS_159	RT_1		nonGL	D-Pipecolinic acid M+H NIST --- L-Lysine M+H-NH3 NIST --- L-Pipecolic acid M+H HMDB --- L-Pipecolic acid M+H NIST --- Pipecolic acid M+H FiehnHILIC	Organic acids and derivatives	Carboxylic acids and derivatives	Amino acids, peptides, and analogues	HMDB0000716, HMDB0005960, HMDB0000070	Pipecolic acid --- L-Pipecolic acid --- D-Pipecolic acid								HXEACLLIILLPRG-RXMQYKEDSA-N, HXEACLLIILLPRG-UHFFFAOYNA-N, HXEACLLIILLPRG-YFKPBYRVSA-N, KDXKERNSBIXSRK-UHFFFAOYSA-N	C6H11NO2	1	M+H --- M+H-NH3	130.086		11.48	11.47	72.1622	4.89118	100	100	0.316166	0.0078831	0.0139807	0.125717	0.416473	0.401816	0.488932	0.07965	0.172971	0.0157913	0.894579	0.442091	0.138468	0.0306505	0.0461429
LPC 20:4	LPC	RP_Pos, RP_NegMSMS_428, 460, 199		Y	nonGL	LPC 20:4-SN1 M+H Atlas --- LPC 20:4-SN2 M+H Atlas --- PC O-20:4 M+H Atlas, LPC 20:4 M+Na Atlas, LPC 20:4 M+HCOO Atlas	Lipids and lipid-like molecules	Glycerophospholipids	Glycerophosphocholines	HMDB0010396	LysoPC(20:4(8Z,11Z,14Z,17Z)/0:0)	Glycerophospholipids [GP]	Glycerophosphocholines [GP01]	Monoacylglycerophosphocholines [GP0105]	LMGP01050140	PC(20:4(8Z,11Z,14Z,17Z)/0:0)	LPC 20:4	LPC 20:4	GOMVPVRDBLLHQC-DOFZRALJNA-N, YDVXUVKGSHUSRO-GKFVBPDJNA-N, GOMVPVRDBLLHQC-DOFZRALJNA-N	C28H50NO7P	1, 2	M+H, M+Na, M+HCOO	544.3375, 566.3195, 588.3309	303.231	2.51	2.56	67.7419	5.96705	100	100	-0.310153	0.00793183	0.0139807	-0.312513	0.0376114	0.0893504	-0.471807	0.0850135	0.178767	-0.280112	0.0148948	0.0364807	-0.168599	0.00691514	0.0136134
PG 37:0	PG	RP_NegMSMS_518		Y	nonGL	PG 18:0_19:0 M-H Atlas						Glycerophospholipids [GP]	Glycerophosphoglycerols [GP04]	Diacylglycerophosphoglycerols [GP0401]	LMGP04010317	PG(18:0/19:0)	PG 37:0	PG 18:0_19:0	XQABIPXCSRJGET-UHFFFAOYNA-N	C43H85O10P	2	M-H	791.583	283.264	3.97	3.94	42.8571	20.099	10	100	-0.308584	0.00800583	0.0139807	-0.156015	0.30188	0.342446	-0.0102711	0.970226	0.646218	-0.147078	0.204836	0.198979	-0.116143	0.0646754	0.0820359
PI 36:1	PI	RP_NegMSMS_692		Y	nonGL	PI 18:0_18:1 M-H Atlas	Lipids and lipid-like molecules	Glycerophospholipids	Glycerophosphoinositols	HMDB0240667	PI(18:0/18:1(9Z))	Glycerophospholipids [GP]	Glycerophosphoinositols [GP06]	Diacylglycerophosphoinositols [GP0601]	LMGP06010957	PI(18:0/18:1(9Z))	PI 36:1	PI 18:0_18:1	YOBFISPJJWPPTK-ZZEZOPTANA-N	C45H85O13P	2	M-H	863.566	241.011	5.83	5.84	61.4555	7.91949	81.6667	100	0.322102	0.00792569	0.0139807	0.376184	0.0154972	0.0461868	0.263096	0.357936	0.418448	0.349201	0.00322003	0.0128005	0.172076	0.00798604	0.0151142
SM 39:1;O2	SM	RP_Pos, RP_NegMSMS_937, 599, 1008		Y	nonGL	SM 37:1;2O/2:0 M+H Atlas, SM 37:1;2O/2:0 M+HCOO Atlas, SM 39:1;2O M+Na Atlas													NRCFATLOSQSVCS-HEFFKOSUNA-N, YNVNEJJGHFZGFO-MHAUTQJVNA-N	C44H89N2O6P	1, 2	M+H, M+HCOO, M+Na	773.6475, 817.644, 795.63	168.041	7.23	7.22	72.043	8.80218	99.1736	100	-0.316724	0.00800383	0.0139807	-0.452239	0.0028719	0.0123883	-0.255878	0.363813	0.421034	-0.217926	0.0658132	0.0997401	-0.183493	0.00393137	0.00864844
SM 40:2;O2	SM	RP_Pos, RP_NegMSMS_971, 620, 1042		Y	nonGL	SM 18:2;2O/22:0 M+H Atlas --- SM 37:2;2O/3:0 M+H Atlas, SM 37:2;2O/3:0 M+HCOO Atlas, SM 40:2;2O M+Na Atlas													LWBJZVWNQXUYSF-JWPISNGYNA-N, UCLWWTCDZKLHGY-INARCNGINA-N, LWBJZVWNQXUYSF-JWPISNGYNA-N, CGPMXFFJDVINHX-NFYLBXPENA-N	C45H89N2O6P	1, 2	M+H, M+HCOO, M+Na	785.6482, 829.644, 807.6307	769.6211, 748.5608	6.95	6.93	69.6237	3.79045	100	100	-0.322748	0.00814316	0.0141196	-0.4271	0.00602108	0.0221416	-0.145466	0.613744	0.536364	-0.200635	0.0978073	0.126627	-0.174931	0.00728288	0.0141888
SM 42:2;O2	SM	RP_Pos, RP_NegMSMS_1136, 681, 1069		Y	nonGL	N-Tetracosenoyl-4-sphingenyl-1-O-phosphorylcholine M+Na NIST --- SM 42:2;2O M+Na Atlas, SM 18:1;2O/24:1 M+HCOO Atlas --- SM 37:2;2O/5:0 M+HCOO Atlas, N-Nervonoyl-D-erythro-sphingosylphosphorylcholine M+H NIST --- N-Tetracosenoyl-4-sphingenyl-1-O-phosphorylcholine M+H NIST --- SM 18:1;2O/24:1 M+H Atlas	Lipids and lipid-like molecules	Sphingolipids	Phosphosphingolipids	HMDB0012107	SM(d18:1/24:1(15Z))	Sphingolipids [SP]	Phosphosphingolipids [SP03]	Ceramide phosphocholines (sphingomyelins) [SP0301]	LMSP03010007	SM(d18:1/24:1(15Z))	SM 42:2;O2	SM 18:1;O2/24:1	CERRQJMSXAXGRO-NFYLBXPENA-N, UYDFMJRVHYJLQZ-KVICREPESA-N, SNJVWPDDBSBJAE-OGZZTDGYNA-N, ZJDDNEXGXYLHDF-AMDQDZSZNA-N, UYDFMJRVHYJLQZ-KVICREPESA-N, WKZHECFHXLTOLJ-QYKFWSDSSA-N, ZJDDNEXGXYLHDF-AMDQDZSZNA-N	C47H93N2O6P	1	M+Na, M+HCOO, M+H	835.6623, 857.6755, 813.6796		7.54	7.51	98.9247	3.5679	100	100	-0.323526	0.00814736	0.0141196	-0.14816	0.351013	0.369701	-0.0455453	0.87482	0.62081	-0.126458	0.30021	0.247912	-0.120914	0.0672041	0.084378
L-Glutamic acid	Amino acids, peptides, and analogues	HILIC_Pos, HILIC_NegMSMS_249, 111			nonGL	DL-Glutamate M+H HMDB --- L-Glutamic acid M+H HMDB --- L-Glutamic acid M+H NIST, L-Glutamic acid M-H HMDB --- L-Glutamic acid M-H NIST	Organic acids and derivatives	Carboxylic acids and derivatives	Amino acids, peptides, and analogues	HMDB0000148, HMDB0060475	L-Glutamic acid --- DL-Glutamate								WHUUTDBJXJRKMK-UHFFFAOYSA-N, WHUUTDBJXJRKMK-VKHMYHEASA-N	C5H9NO4	1, 2	M+H, M-H	148.0604, 146.0459	102.053	14.765	14.745	56.9106	12.9721	86.4407	100	0.314928	0.00819476	0.0141606	0.22272	0.148682	0.221738	0.359994	0.199061	0.306667	0.265387	0.0239729	0.0505668	0.148266	0.0204931	0.0326663
SM 42:3;O2	SM	RP_Neg, RP_PosMSMS_676, 1061, 1127		Y	nonGL	SM 18:2;2O/24:1 M+HCOO Atlas --- SM 37:3;2O/5:0 M+HCOO Atlas, SM 37:3;2O/5:0 M+H Atlas, SM 42:3;2O M+Na Atlas													BOTNSYXPDLQHTH-HRUVKIKFNA-N, FZDRPMALWLYZKK-GPSJJNIRNA-N, FZDRPMALWLYZKK-GPSJJNIRNA-N, WLXNGAXFWMHMSN-SKFHMOIXNA-N	C47H91N2O6P	1, 2	M+HCOO, M+H, M+Na	855.6599, 811.663, 833.6463	650.583	7.02	7	67.7419	4.68721	100	100	-0.317721	0.00822467	0.0141711	-0.229626	0.140047	0.214768	-0.0887565	0.7548	0.582586	-0.0682993	0.570123	0.350335	-0.135842	0.0359361	0.0526381
Glu-Val-Phe	Amino acids, peptides, and analogues	HILIC_PosMSMS_1320			nonGL	Glu-Val-Phe M+H-H2O NIST	Organic acids and derivatives	Carboxylic acids and derivatives	Amino acids, peptides, and analogues										FVGOGEGGQLNZGH-UHFFFAOYSA-N	C19H27N3O6	1	M+H-H2O	376.186		6.12	6.14	64.3243	6.65681	100	100	-0.320095	0.00828216	0.0142291	-0.308367	0.0482807	0.104476	-0.292984	0.30526	0.381435	-0.333262	0.00499196	0.017125	-0.161199	0.0131044	0.0226429
FA 10:1;O2	FA - Fatty Acids and Conjugates	HILIC_NegMSMS_288		Y	nonGL	Sebacic acid M-H HMDB --- Sebacic acid; LC-ESI-QTOF; MS2; CE M-H MassBank	Lipids and lipid-like molecules	Fatty Acyls	Fatty acids and conjugates	HMDB0000792	Sebacic acid	Fatty Acyls [FA]	Fatty Acids and Conjugates [FA01]	Dicarboxylic acids [FA0117]	LMFA01170006	Sebacic acid	FA 10:1;O2		CXMXRPHRNRROMY-UHFFFAOYSA-N	C10H18O4	1	M-H	201.113		3.16	3.21	46.3415	27.0221	67.7966	100	0.32512	0.00833148	0.0142727	0.368033	0.0198635	0.0563806	0.149601	0.607347	0.53401	0.112543	0.360548	0.274913	0.16547	0.0121982	0.0215151
PE O-34:3	PE-O	RP_Pos, RP_NegMSMS_707, 317		Y	nonGL	PE O-16:1_18:2 M+H Atlas, PE O-16:1_18:2 M-H Atlas													RIQAKBUOHSSMTC-PNBIJBBKNA-N	C39H74NO7P	2	M+H, M-H	700.5243, 698.513	337.2702, 279.2314	6.27	6.255	66.9355	7.20063	100	100	-0.313534	0.00841161	0.0143687	-0.216931	0.159143	0.231879	-0.158803	0.57204	0.521891	0.0587545	0.621623	0.366719	-0.136146	0.0335685	0.0497816
PC 42:10	PC	RP_PosMSMS_1192, 1268		Y	nonGL	PC 20:5_22:5 M+H Atlas, PC 42:10 M+Na Atlas	Lipids and lipid-like molecules	Glycerophospholipids	Glycerophosphocholines	HMDB0008517	PC(20:5(5Z,8Z,11Z,14Z,17Z)/22:5(7Z,10Z,13Z,16Z,19Z))	Glycerophospholipids [GP]	Glycerophosphocholines [GP01]	Diacylglycerophosphocholines [GP0101]	LMGP01011058	PC(20:5(5Z,8Z,11Z,14Z,17Z)/22:5(7Z,10Z,13Z,16Z,19Z))	PC 42:10	PC 20:5_22:5	KJZGPYYLCQSOIZ-DBXDPKMRNA-N	C50H80NO8P	1	M+H, M+Na	854.5638, 876.5469		5.25	5.23	46.5054	5.12333	100	100	-0.321481	0.00847959	0.0144023	-0.263433	0.0949847	0.169236	-0.533085	0.062212	0.147546	-0.232087	0.0550877	0.0903765	-0.166491	0.0108882	0.01967
Phosphonic acid, ethyl-, diethyl ester	Xenobiotics	HILIC_PosMSMS_1135			nonGL	Phosphonic acid, ethyl-, diethyl ester 2M+H NIST													AATNZNJRDOVKDD-UHFFFAOYSA-N	C6H15O3P	1	2M+H	333.156		2.67	2.7	29.1892	16.8111	67.2269	100	-0.324434	0.00846872	0.0144023	-0.25859	0.104458	0.177761	-0.169889	0.559401	0.514439	-0.183671	0.134049	0.153263	-0.147159	0.0263712	0.0405192
2-Aminobenzoic acid --- p-Aminobenzoic acid	Benzenoids	HILIC_PosMS1_116	RT_2		nonGL	2-Pyridylacetic acid M+H-H2O NIST --- 3-Pyridylacetic acid M+H-H2O NIST --- 4-Aminobenzoic acid M+H-H2O NIST --- Anthranilic acid M+H-H2O NIST	Benzenoids	Benzene and substituted derivatives	Benzoic acids and derivatives	HMDB0001123, HMDB0001392	2-Aminobenzoic acid --- p-Aminobenzoic acid								ALYNCZNDIQEVRV-UHFFFAOYSA-N, BPSNETAIJADFTO-UHFFFAOYSA-N, RWZYAGGXGHYGMB-UHFFFAOYSA-N, WGNUNYPERJMVRM-UHFFFAOYSA-N	C7H7NO2	1	M+H-H2O	120.045		10.39	10.4	64.0541	21.7973	95.7983	100	-0.318477	0.00858278	0.0145361	-0.177334	0.259327	0.312561	-0.328994	0.248956	0.346585	-0.0970838	0.422681	0.301707	-0.139671	0.0322362	0.0482862
5-Hydroxyindole --- Indoxyl --- 1,3-Dihydro-(2H)-indol-2-one	Indoles and derivatives	HILIC_PosMS1_182			nonGL	1,3-Dihydro-(2H)-indol-2-one M+H HMDB --- 5-Hydroxyindole M+H HMDB --- Indoxyl M+H HMDB	Organoheterocyclic compounds	Indoles and derivatives	Hydroxyindoles --- Indolines	HMDB0004094, HMDB0059805, HMDB0061918	Indoxyl --- 5-Hydroxyindole --- 1,3-Dihydro-(2H)-indol-2-one								JYGFTBXVXVMTGB-UHFFFAOYSA-N, LMIQERWZRIFWNZ-UHFFFAOYSA-N, PCKPVGOLPKLUHR-UHFFFAOYSA-N	C8H7NO	1	M+H	134.06		10.45	10.39	64.0541	8.96586	100	100	-0.322799	0.00867654	0.0146533	-0.125027	0.434165	0.407836	-0.193648	0.504822	0.486179	-0.20474	0.0936798	0.123914	-0.124531	0.0607204	0.0783064
PS 36:2	PS	HILIC_NegMSMS_1323		Y	nonGL	1,2-Di-(9Z-octadecenoyl)-sn-glycero-3-phosphoserine M-H-NH3 NIST --- 1,2-Dilinoleoyl-sn-glycero-3-phospho-(1'-rac-glycerol) M-H NIST	Lipids and lipid-like molecules	Glycerophospholipids	Glycerophosphoserines	HMDB0012390	PS(18:1(9Z)/18:1(9Z))	Glycerophospholipids [GP]	Glycerophosphoserines [GP03]	Diacylglycerophosphoserines [GP0301]	LMGP03010030	PS(18:1(9Z)/18:1(9Z))	PS 36:2	PS 18:1/18:1	AKWGRDPPGYFWIW-ULJYVIMSSA-N, WTBFLCSPLLEDEM-JIDRGYQWSA-N	C42H78NO10P	1	M-H --- M-H-NH3	769.507		6.6	6.63	3.25203	16.4756	10.1695	94.898	0.321469	0.00897945	0.015122	0.182248	0.253419	0.308846	0.321482	0.267223	0.359436	0.0829645	0.499924	0.328902	0.140989	0.0332403	0.0494178
PS 40:6	PS	RP_Pos, RP_NegMSMS_1140, 1208, 636		Y	nonGL	1-Octadecanoyl-2-(4Z,7Z,10Z,13Z,16Z,19Z-docosahexaenoyl)-sn-glycero-3-phospho-L-serine M+H NIST, PS 40:6 M+Na Atlas, 1-Octadecanoyl-2-(4Z,7Z,10Z,13Z,16Z,19Z-docosahexaenoyl)-sn-glycero-3-phospho-L-serine M-H NIST	Lipids and lipid-like molecules	Glycerophospholipids	Glycerophosphoserines	HMDB0010167	PS(18:0/22:6(4Z,7Z,10Z,13Z,16Z,19Z))	Glycerophospholipids [GP]	Glycerophosphoserines [GP03]	Diacylglycerophosphoserines [GP0301]	LMGP03010040	PS(18:0/22:6(4Z,7Z,10Z,13Z,16Z,19Z))	PS 40:6	PS 18:0_22:6	LYYHRRPTEXPVOR-SYEOQEKUSA-N, XKGPGUWUJQTUBU-FEAYMNSJNA-N	C46H78NO10P	2, 1	M+H, M+Na, M-H	836.5386, 858.5208, 834.5284	651.5346, 419.2532	5.56	5.52	44.3548	8.96413	100	100	0.315514	0.00923443	0.0155076	0.352541	0.0233531	0.064167	0.371643	0.192255	0.300795	0.223796	0.06239	0.0967502	0.171822	0.00797337	0.0151142
L-Threonine --- L-Allothreonine ---L- Homoserine	Amino acids, peptides, and analogues	HILIC_PosMSMS_118			nonGL	(R)-3-Amino-4-hydroxybutyric acid; LC-ESI-QTOF; MS2; CE M+H MassBank --- (S)-3-Amino-4-hydroxybutyric acid; LC-ESI-QTOF; MS2; CE M+H MassBank --- Allothreonine M+H FiehnHILIC, Threonine M+H FiehnHILIC --- D-Threonine M+H HMDB --- Homoserine M+H FiehnHILIC --- L-(-)-Threonine; LC-ESI-ITFT; MS2; m/z M+H MassBank --- L-Allothreonine M+H HMDB --- L-Homoserine M+H NIST --- L-Homoserine; LC-ESI-ITFT; M…	Organic acids and derivatives	Carboxylic acids and derivatives	Amino acids, peptides, and analogues	HMDB0000167, HMDB0000719, HMDB0004041, HMDB0250801	L-Threonine --- L-Homoserine --- L-Allothreonine --- D-Threonine								AYFVYJQAPQTCCC-GBXIJSLDSA-N, AYFVYJQAPQTCCC-HRFVKAFMSA-N, AYFVYJQAPQTCCC-UHFFFAOYNA-N, AYFVYJQAPQTCCC-UHFFFAOYSA-N, BUZICZZQJDLXJN-GSVOUGTGSA-N, BUZICZZQJDLXJN-VKHMYHEASA-N, CDUUKBXTEOFITR-UHFFFAOYNA-N, KNTFCRCCPLEUQZ-UHFFFAOYSA-N, PSFABYLDRXJYID-UHFFFAOYNA-N, UKAUYVFTDYCKQA-UHFFFAOYNA-N, UKAUYVFTDYCKQA-VKHMYHEASA-N	C4H9NO3	1	M+H	120.064		13.64	13.63	41.3514	19.4221	99.1597	100	0.315419	0.0092665	0.0155177	0.378874	0.0145931	0.0442977	0.494074	0.0818924	0.175341	0.281996	0.0181835	0.042139	0.182929	0.00462399	0.00974076
Epinephrine --- Normetanephrine	Benzenoids	HILIC_PosMS1_435			nonGL	(-)-Epinephrine M+H NIST --- Epinephrine M+H HMDB --- Normetanephrine M+H HMDB	Benzenoids	Phenols	Benzenediols --- Methoxyphenols	HMDB0000068, HMDB0000819	Epinephrine --- Normetanephrine								UCTWMZQNUQWSLP-VIFPVBQESA-N, YNYAYWLBAHXHLL-UHFFFAOYSA-N	C9H13NO3	1	M+H	184.096		6.1	6.12	60	5.82377	100	100	0.313954	0.00937057	0.0156044	0.142811	0.362716	0.376301	0.490535	0.083125	0.17679	0.265939	0.0256943	0.0530188	0.140919	0.0301297	0.0457051
TAG 54:8	TAG	RP_PosMSMS_1316, 1328		Y	GL	TG 18:2_18:3_18:3 M+NH4 Atlas, TG 14:0_18:2_22:6 M+Na Atlas --- TG 14:0_20:4_20:4 M+Na Atlas --- TG 16:1_18:2_20:5 M+Na Atlas --- TG 18:2_18:3_18:3 M+Na Atlas	Lipids and lipid-like molecules	Glycerolipids	Triradylcglycerols	HMDB0042539, HMDB0042836, HMDB0048761, HMDB0052749	TG(14:0/18:2(9Z,12Z)/22:6(4Z,7Z,10Z,13Z,16Z,19Z)) --- TG(14:0/20:4(8Z,11Z,14Z,17Z)/20:4(8Z,11Z,14Z,17Z)) --- TG(16:1(9Z)/18:2(9Z,12Z)/20:5(5Z,8Z,11Z,14Z,17Z)) --- TG(18:2(9Z,12Z)/18:3(9Z,12Z,15Z)/18:3(9Z,12Z,15Z))	Glycerolipids [GL]	Triradylglycerols [GL03]	Triacylglycerols [GL0301]	LMGL03010471, LMGL03010471 --- LMGL03010503 --- LMGL03014400	TG(18:2(9Z,12Z)/18:3(9Z,12Z,15Z)/18:3(9Z,12Z,15Z))[iso3], TG(14:0/18:2(9Z,12Z)/22:6(4Z,7Z,10Z,13Z,16Z,19Z))[iso6] --- TG(16:1(9Z)/18:2(9Z,12Z)/20:5(5Z,8Z,11Z,14Z,17Z))[iso6] --- TG(18:2(9Z,12Z)/18:3(9Z,12Z,15Z)/18:3(9Z,12Z,15Z))[iso3]	TG 54:8	TG 18:2_18:3_18:3, TG 14:0_18:2_22:6 --- TG 16:1_18:2_20:5 --- TG 18:2_18:3_18:3	IMPMCCKWZKDAGE-DJOODRDWNA-N, AINACBPMKQPREK-UUCWSGKLNA-N, CJQMVWLALQLDMB-ZHPZIBMJNA-N, IMPMCCKWZKDAGE-DJOODRDWNA-N, WVSDNSFUOYSLDY-YSJMBLHXNA-N	C57H94O6	1	M+NH4, M+Na	892.7325, 897.6912		9.87	9.875	60.4839	18.4531	78.5124	100	-0.311836	0.00935401	0.0156044	-0.233792	0.131885	0.206379	-0.585713	0.0364644	0.101551	-0.263988	0.0257509	0.0530188	-0.161335	0.0120275	0.0213723
TAG 62:15	TAG	RP_PosMSMS_1521, 1532		Y	GL	TG 20:4_20:5_22:6 M+NH4 Atlas, TG 20:4_20:5_22:6 M+Na Atlas	Lipids and lipid-like molecules	Glycerolipids	Triradylcglycerols	HMDB0055669	TG(20:4(8Z,11Z,14Z,17Z)/20:5(5Z,8Z,11Z,14Z,17Z)/22:6(4Z,7Z,10Z,13Z,16Z,19Z))								ZRIKAMSSPHWCKG-RBOFUSPWNA-N	C65H96O6	1	M+NH4, M+Na	990.7481, 995.7034		9.66	9.63	46.2366	5.58042	94.2149	100	-0.319179	0.0095852	0.0159173	-0.15491	0.332713	0.362997	-0.58785	0.0410009	0.109081	-0.20814	0.0886893	0.119669	-0.149714	0.0236896	0.0370677
PE 34:0	PE	RP_NegMSMS_346		Y	nonGL	PE 16:0_18:0 M-H Atlas	Lipids and lipid-like molecules	Glycerophospholipids	Glycerophosphoethanolamines	HMDB0008925	PE(16:0/18:0)	Glycerophospholipids [GP]	Glycerophosphoethanolamines [GP02]	Diacylglycerophosphoethanolamines [GP0201]	LMGP02011225	PE(16:0/18:0)	PE 34:0	PE 16:0_18:0	RPJZYOHZALDGKI-UHFFFAOYNA-N	C39H78NO8P	2	M-H	718.539	283.261	6.86	6.84	23.9892	8.24631	74.1667	100	-0.292692	0.0096155	0.0159233	-0.196213	0.180018	0.252207	-0.111062	0.677353	0.555872	0.000137988	0.999027	0.467792	-0.124012	0.0416575	0.0591299
PE 37:6	PE	RP_PosMSMS_860		Y	nonGL	PE 15:0_22:6 M+H Atlas	Lipids and lipid-like molecules	Glycerophospholipids	Glycerophosphoethanolamines	HMDB0008913	PE(15:0/22:6(4Z,7Z,10Z,13Z,16Z,19Z))	Glycerophospholipids [GP]	Glycerophosphoethanolamines [GP02]	Diacylglycerophosphoethanolamines [GP0201]	LMGP02010473	PE(15:0/22:6(4Z,7Z,10Z,13Z,16Z,19Z))	PE 37:6	PE 15:0_22:6	WIJRNOBSWIZHST-JTURFRPLNA-N	C42H72NO8P	1	M+H	750.504		5.44	5.39	32.2581	11.7299	99.1736	100	-0.297357	0.0106679	0.0176119	-0.200134	0.184209	0.256435	-0.471236	0.083936	0.177468	-0.21009	0.0685812	0.102994	-0.1452	0.0201054	0.0322205
SM 43:1;O2	SM	RP_Pos, RP_NegMSMS_1115, 708, 1183		Y	nonGL	SM 37:1;2O/6:0 M+H Atlas, SM 37:1;2O/6:0 M+HCOO Atlas, SM 43:1;2O M+Na Atlas													WTTNEBAVFPINTB-CDJCAARLNA-N, PVVLRRCWOPKLHY-OHYVAXEENA-N	C48H97N2O6P	2, 1	M+H, M+HCOO, M+Na	829.7103, 873.7061, 851.6925	184.0713, 813.6807	8.48	8.48	36.2903	13.8382	50	100	-0.305057	0.0106943	0.0176119	-0.443662	0.00345384	0.0142426	-0.318916	0.256691	0.352515	-0.295045	0.0119535	0.0313573	-0.182007	0.00421595	0.00917292
8-Hydroxydaidzein --- Genistein	Xenobiotics	HILIC_PosMSMS_801	RT_2		nonGL	7,8,4'-Trihydroxyisoflavone M+H NIST --- Genistein M+H HMDB	Phenylpropanoids and polyketides	Isoflavonoids	Isoflav-2-enes	HMDB0003217, HMDB0033860	Genistein --- 8-Hydroxydaidzein	Polyketides [PR]	Flavonoids [PK12]	Isoflavonoids [PK1205]	LMPK12050137 --- LMPK12050218	8-Hydroxydaidzein --- Genistein			BMZFZTMWBCFKSS-UHFFFAOYSA-N, TZBJGXHYKVUXJN-UHFFFAOYSA-N	C15H10O5	1	M+H	271.06		11.07	11.09	30.2703	19.626	24.3697	97.9592	-0.311055	0.0109361	0.0179606	-0.207198	0.190275	0.260455	-0.179933	0.532525	0.500542	-0.243812	0.0435767	0.0763385	-0.134854	0.040368	0.0577117
FA 22:6 --- FA 20:3	FA - Fatty Acids and Conjugates	RP_PosMS1_59		Y	nonGL	Docosahexaenoic acid M+H HMDB --- cis-4,7,10,13,16,19-Docosahexaenoic acid M+H NIST --- cis-5,8,11-Eicosatrienoic acid M+Na NIST	Lipids and lipid-like molecules	Fatty Acyls	Fatty acids and conjugates	HMDB0002183, HMDB0010378	Docosahexaenoic acid --- 5,8,11-Eicosatrienoic acid	Fatty Acyls [FA]	Fatty Acids and Conjugates [FA01]	Unsaturated fatty acids [FA0103]	LMFA01030185 --- LMFA01030381	DHA --- ETrE(5Z, 8Z, 11Z)	FA 20:3 --- FA 22:6		MBMBGCFOFBJSGT-KUBAVDMBSA-N, UNSRRHDPHVZAHH-YOILPLPUSA-N	C20H34O2, C22H32O2	1	M+H --- M+Na	329.242		4.19	4.17	100	4.12931	100	100	-0.29933	0.0110872	0.0181587	-0.298997	0.0485306	0.104671	-0.529851	0.0542826	0.133119	-0.216841	0.0630914	0.0967502	-0.166223	0.00824957	0.0155144
PC 34:1	PC	RP_Pos, RP_NegMSMS_889, 960, 560		Y	nonGL	1-Hexadecanoyl-2-(9Z-octadecenoyl)-sn-glycero-3-phosphocholine M+H NIST --- PC(16:0/18:1(9Z)) M+H HMDB, PC 34:1 M+Na Atlas, PC 16:0_18:1 M+HCOO Atlas	Lipids and lipid-like molecules	Glycerophospholipids	Glycerophosphocholines	HMDB0007972, HMDB0243985	PC(16:0/18:1(9Z)) --- 1-Palmitoyl-2-oleoyl-sn-glycero-3-phosphocholine	Glycerophospholipids [GP]	Glycerophosphocholines [GP01]	Diacylglycerophosphocholines [GP0101]	LMGP01010005, LMGP01011503, LMGP01010005 --- LMGP01010581	PC(16:0/18:1(9Z)), PC(17:0/17:1(9Z)), PC(16:0/18:1(9E)) --- PC(16:0/18:1(9Z))	PC 34:1	PC 16:0_18:1, PC 17:0_17:1	WTJKGGKOPKCXLL-VYOBOKEXSA-N, DKIULVMMIRHYHM-VZCXRCSSNA-N, WTJKGGKOPKCXLL-MRCUWXFGNA-N	C42H82NO8P	2	M+H, M+Na, M+HCOO	760.5806, 782.5626, 804.5766	504.3444, 146.9794, 480.3025	6.4	6.39	99.7312	3.06306	99.1736	100	-0.311069	0.0112739	0.0184139	-0.408672	0.00904668	0.0301099	-0.407844	0.156929	0.270032	-0.110107	0.368496	0.2771	-0.182322	0.00529927	0.0110462
Chlorogenic acid	Alcohols and polyols	HILIC_PosMS1_1146			nonGL	Chlorogenic acid M+H-H2O NIST	Organic oxygen compounds	Organooxygen compounds	Alcohols and polyols	HMDB0003164	Chlorogenic acid								CWVRJTMFETXNAD-VQWGVLBKSA-N	C16H18O9	1	M+H-H2O	337.089		11.99	12	61.3514	11.7348	100	100	-0.311039	0.0114748	0.0186908	-0.333856	0.0345557	0.0853521	-0.455323	0.114362	0.216413	-0.250914	0.0389314	0.0708424	-0.171719	0.00897029	0.0166596
dUMP	Pyrimidine deoxyribonucleotides	HILIC_NegMS1_600	RT_2		nonGL	5-Benzoyl-4-hydroxy-2-methoxybenzenesulfonic acid M-H NIST --- Resveratrol-3-O-sulfate M-H NIST --- Sulisobenzone M-H HMDB --- dUMP M-H HMDB	Nucleosides, nucleotides, and analogues	Pyrimidine nucleotides	Pyrimidine deoxyribonucleotides	HMDB0001409	dUMP								CXVGEDCSTKKODG-UHFFFAOYSA-N, DULQFFCIVGYOFH-OWOJBTEDSA-N, JSRLJPSBLDHEIO-SHYZEUOFSA-N	C14H12O6S, C9H13N2O8P	1	M-H	307.026		10.35	10.36	57.9946	13.9194	99.1525	100	-0.314025	0.0116165	0.01887	-0.392177	0.0136501	0.0422169	-0.568721	0.0502787	0.125001	-0.0904267	0.46655	0.318083	-0.188835	0.00434256	0.00941021
gamma-Glutamylleucine	Amino acids, peptides, and analogues	HILIC_NegMS1_460			nonGL	gamma-Glutamylleucine M-H FiehnHILIC --- gamma-Glutamylleucine M-H HMDB	Organic acids and derivatives	Carboxylic acids and derivatives	Amino acids, peptides, and analogues	HMDB0011171	gamma-Glutamylleucine								MYFMARDICOWMQP-UHFFFAOYNA-N, MYFMARDICOWMQP-YUMQZZPRSA-N	C11H20N2O5	1	M-H	259.129		9.37	9.37	49.8645	18.7891	56.7797	100	-0.313043	0.011812	0.0191355	-0.3892	0.0143172	0.0436622	-0.434655	0.136065	0.245252	0.0240512	0.846524	0.431267	-0.180898	0.00634481	0.012693
LPE 20:1	LPE	RP_PosMS1_376		Y	nonGL	LPC 17:1-SN1 M+H Atlas --- LPC 17:1-SN2 M+H Atlas --- LPE 20:1 M+H Atlas --- PE O-13:1_7:0 M+H Atlas --- PE O-14:1_6:0 M+H Atlas --- PE O-15:1_5:0 M+H Atlas --- PE O-16:1_4:0 M+H Atlas --- PE O-17:1_3:0 M+H Atlas --- PE O-18:1_2:0 M+H Atlas	Lipids and lipid-like molecules	Glycerophospholipids	Glycerophosphoethanolamines	HMDB0011512	LysoPE(20:1(11Z)/0:0)	Glycerophospholipids [GP]	Glycerophosphocholines [GP01] --- Glycerophosphoethanolamines [GP02]	Monoacylglycerophosphocholines [GP0105] --- Monoacylglycerophosphoethanolamines [GP0205]	LMGP01050126 --- LMGP02050020	PC(17:1(9Z)/0:0) --- PE(20:1(11Z)/0:0)	LPC 17:1 --- LPE 20:1	LPC 17:1 --- LPE 20:1	FNCJMPDRDNBYGN-CLFYSBASNA-N, JEAGLCKGAKACCE-KTKRTIGZNA-N, LPMGFNAQZPADDZ-QXMHVHEDNA-N, OLUNFNBCXHYJOB-KTKRTIGZNA-N, PXMGIKBGOYRMPD-KTKRTIGZNA-N, RCANTOMLHCVXSK-KHPPLWFENA-N, XSILRVNWFQONQW-HJWRWDBZNA-N, YATJTJUBHNZPTE-KHPPLWFENA-N	C25H50NO7P	1	M+H	508.339		3.43	3.43	20.9677	17.9758	64.4628	100	-0.293475	0.0120157	0.0194126	-0.328182	0.0284965	0.0735603	-0.399873	0.144567	0.256095	-0.0154387	0.894814	0.442091	-0.162751	0.0090933	0.0167317
Acamprosate	Xenobiotics	HILIC_NegMSMS_238	RT_1		nonGL	Acamprosate M-H HMDB --- Acamprosate M-H NIST --- Acamprosate; LC-ESI-ITFT; MS2; CE M-H MassBank	Organic acids and derivatives	Organic sulfonic acids and derivatives	Organosulfonic acids and derivatives	HMDB0014797	Acamprosate								AFCGFAGUEYAMAO-UHFFFAOYSA-N	C5H11NO4S	1	M-H	180.035		10.61	10.57	21.1382	19.9047	49.1525	100	0.305469	0.0120928	0.0194319	0.342611	0.0281544	0.073254	0.492891	0.0835349	0.17714	0.293935	0.0139691	0.0347489	0.17366	0.00748609	0.01449
PI 34:1	PI	RP_Pos, RP_NegMSMS_1212, 643		Y	nonGL	PI 34:1 M+Na Atlas, 1-Hexadecanoyl-2-(9Z-octadecenoyl)-sn-glycero-3-phospho-(1'-myo-inositol) M-H NIST	Lipids and lipid-like molecules	Glycerophospholipids	Glycerophosphoinositols	HMDB0009783	PI(16:0/18:1(9Z))								IRBFVYAOJSGZPV-NXVVXOECNA-N, PDLAMJKMOKWLAJ-AGORXRROSA-N	C43H81O13P	1, 2	M+Na, M-H	859.5272, 835.5346	391.223	5.315	5.29	67.2043	13.6398	98.3471	100	0.307749	0.0120863	0.0194319	0.314298	0.0461323	0.101502	0.264397	0.359752	0.419702	0.336753	0.00495222	0.017125	0.157188	0.0166971	0.0274977
SM 32:1;O2	SM	RP_Pos, RP_NegMSMS_701, 648, 349		Y	nonGL	SM 32:1;2O M+Na Atlas, SM 16:1;2O/16:0 M+H Atlas --- SM 30:1;2O/2:0 M+H Atlas, SM 16:1;2O/16:0 M+HCOO Atlas --- SM 18:1;2O/14:0 M+HCOO Atlas --- SM 30:1;2O/2:0 M+HCOO Atlas	Lipids and lipid-like molecules	Sphingolipids	Phosphosphingolipids	HMDB0240616, HMDB0012097	SM(d18:1/14:0) --- SM(d16:1/16:0)	Sphingolipids [SP]	Phosphosphingolipids [SP03]	Ceramide phosphocholines (sphingomyelins) [SP0301]	LMSP03010035, LMSP03010028 --- LMSP03010035	SM(d16:1/16:0), SM(d16:1/16:0) --- SM(d18:1/14:0)	SM 32:1;O2	SM 16:1;O2/16:0, SM 16:1;O2/16:0 --- SM 18:1;O2/14:0	UHPVNYAFNAFWTE-ZCXUNETKNA-N, AQXGTEXDSVKFRN-NVQSTNCTNA-N, RPTUKVYGSPDHGQ-SJCQXOIGNA-N, AQXGTEXDSVKFRN-NVQSTNCTNA-N, KYICBZWZQPCUMO-SJCQXOIGNA-N, RPTUKVYGSPDHGQ-SJCQXOIGNA-N	C37H75N2O6P	2, 1	M+Na, M+H, M+HCOO	697.5224, 675.5405, 719.5349	514.4582, 659.5122	4.91	4.91	68.0108	3.96003	100	100	-0.288794	0.0123377	0.0197721	-0.332768	0.0244114	0.0666911	-0.305336	0.260468	0.354998	0.00293413	0.979702	0.46195	-0.157186	0.0108107	0.0195894
N-Stearoyltaurine	N-acyl amines	HILIC_NegMS1_846	RT_2		nonGL	N-Stearoyltaurine M-H NIST	Lipids and lipid-like molecules	Fatty Acyls	Fatty amides	HMDB0240595	N-Stearoyltaurine	Fatty Acyls [FA]	Fatty amides [FA08]	N-acyl amines [FA0802]	LMFA08020078	N-stearoyl taurine	NAT 18:0		LMIJIHJZVURGQK-UHFFFAOYSA-N	C20H41NO4S	1	M-H	390.265		6.54	6.55	32.2493	18.2436	43.2203	95.9184	0.30789	0.0129337	0.0206718	0.300177	0.059587	0.120585	0.663737	0.0211104	0.0712509	0.229715	0.0607984	0.095792	0.176002	0.00771963	0.0147504
SM 41:1;O2	SM	RP_Pos, RP_NegMSMS_1100, 1025, 658		Y	nonGL	SM 41:1;2O M+Na Atlas, SM 18:1;2O/23:0 M+H Atlas --- SM 37:1;2O/4:0 M+H Atlas, SM 18:1;2O/23:0 M+HCOO Atlas --- SM 37:1;2O/4:0 M+HCOO Atlas	Lipids and lipid-like molecules	Sphingolipids	Phosphosphingolipids	HMDB0012105	SM(d18:1/23:0)	Sphingolipids [SP]	Phosphosphingolipids [SP03]	Ceramide phosphocholines (sphingomyelins) [SP0301]	LMSP03010078	SM(d18:1/23:0)	SM 41:1;O2	SM 18:1;O2/23:0	JLSREMDIVVZCAX-NHFVQZBWNA-N, IFWUAILUJWALHR-OGSMZCTINA-N, SXZWBNWTCVLZJN-NHFVQZBWNA-N	C46H93N2O6P	1, 2	M+Na, M+H, M+HCOO	823.662, 801.6793, 845.6754	785.656	7.9	7.87	84.4086	3.2823	100	100	-0.294952	0.013229	0.0210872	-0.442054	0.00340961	0.0141492	-0.211953	0.449643	0.46306	-0.319266	0.00609522	0.0204541	-0.173144	0.00633368	0.012693
Melatonin	Indoles and derivatives	HILIC_PosMS1_621			nonGL	Aminoglutethimide M+H HMDB --- Aminoglutethimide M+H NIST --- Melatonin M+H FiehnHILIC --- Mofebutazone M+H NIST	Organoheterocyclic compounds	Indoles and derivatives	Indoles	HMDB0001389	Melatonin								DRLFMBDRBRZALE-UHFFFAOYSA-N, REOJLIXKJWXUGB-UHFFFAOYSA-N, ROBVIMPUHSLWNV-UHFFFAOYSA-N	C13H16N2O2	1	M+H	233.126		1.45	1.46	42.973	22.1162	70.5882	100	-0.307947	0.0135299	0.0215093	-0.324872	0.0424604	0.0962371	-0.648672	0.0252739	0.0788838	-0.29124	0.0174938	0.0410934	-0.179548	0.00689586	0.0136134
VAE 16:0	Other lipids	RP_PosMSMS_398, 434		Y	nonGL	VAE 16:0 M+H Atlas, VAE 16:0 M+Na Atlas	Lipids and lipid-like molecules	Fatty Acyls	Fatty acid esters	HMDB0243575	[3,7-Dimethyl-9-(2,6,6-trimethylcyclohexen-1-yl)nona-2,4,6,8-tetraenyl] hexadecanoate								VYGQUTWHTHXGQB-UHFFFAOYSA-N	C36H60O2	1	M+H, M+Na	525.4628, 547.447		8.85	8.8	29.3011	10.7861	89.2562	100	-0.301112	0.0136449	0.0216344	-0.173891	0.271232	0.317265	-0.138948	0.629158	0.541305	-0.115757	0.341189	0.268946	-0.123989	0.0593239	0.0776787
LPS 18:2	LPS	HILIC_NegMSMS_1106		Y	nonGL	LPS 18:2 M-H Atlas	Lipids and lipid-like molecules	Glycerophospholipids	Glycerophosphoserines	HMDB0240604	LysoPS(18:2(9Z,12Z)/0:0)	Glycerophospholipids [GP]	Glycerophosphoserines [GP03]	Monoacylglycerophosphoserines [GP0305]	LMGP03050011	PS(18:2(9Z,12Z)/0:0)	LPS 18:2	LPS 18:2	HLISFLFEEBTXRV-HZJYTTRNNA-N	C24H44NO9P	1	M-H	520.27		10.65	10.61	51.2195	4.83657	100	100	-0.270997	0.0137964	0.0218165	-0.240177	0.09029	0.162639	-0.341613	0.185877	0.294537	-0.192392	0.0773735	0.111692	-0.137788	0.0194103	0.0313595
Tryptamine	Indoles and derivatives	HILIC_NegMS1_159			nonGL	Tryptamine M-H HMDB	Organoheterocyclic compounds	Indoles and derivatives	Tryptamines and derivatives	HMDB0000303	Tryptamine								APJYDQYYACXCRM-UHFFFAOYSA-N	C10H12N2	1	M-H	159.092		10.87	10.86	74.7967	17.1324	61.0169	100	-0.29932	0.0146624	0.0231246	-0.258115	0.102465	0.176335	-0.404284	0.15968	0.271756	-0.0547068	0.65485	0.37602	-0.152368	0.0203608	0.0325423
Xanthine	Purines and purine derivatives	HILIC_Neg, HILIC_PosMSMS_132, 281			nonGL	Oxypurinol M-H HMDB --- Xanthine M-H HMDB, Phenylthiourea M+H HMDB --- Xanthine M+H HMDB --- Xanthine M+H NIST	Organoheterocyclic compounds	Imidazopyrimidines	Purines and purine derivatives	HMDB0000292	Xanthine								HXNFUBHNUDHIGC-UHFFFAOYSA-N, LRFVTYWOQMYALW-UHFFFAOYSA-N, FULZLIGZKMKICU-UHFFFAOYSA-N, LRFVTYWOQMYALW-UHFFFAOYSA-N	C5H4N4O2, C5H4N4O2, C7H8N2S	1	M-H, M+H	151.0259, 153.0403		7.55	7.56	100	7.94445	100	100	-0.293555	0.0148772	0.0234016	-0.0361468	0.81734	0.544339	-0.64102	0.0220366	0.0732247	-0.217222	0.0684166	0.102994	-0.124387	0.0551687	0.073578
FA 11:1;O2	FA - Fatty Acids and Conjugates	HILIC_NegMSMS_324		Y	nonGL	Undecanedioic acid M-H HMDB	Lipids and lipid-like molecules	Fatty Acyls	Fatty acids and conjugates	HMDB0000888	Undecanedioic acid	Fatty Acyls [FA]	Fatty Acids and Conjugates [FA01]	Dicarboxylic acids [FA0117]	LMFA01170007	Undecanedioic acid	FA 11:1;O2		LWBHHRRTOZQPDM-UHFFFAOYSA-N	C11H20O4	1	M-H	215.128		2.82	2.87	54.4715	25.9422	37.2881	100	0.301013	0.0151661	0.0237932	0.112464	0.484089	0.429504	-0.308418	0.289631	0.374902	0.0314043	0.799617	0.419372	0.0893805	0.182597	0.178162
N-Acetyltryptophan	Amino acids, peptides, and analogues	HILIC_NegMS1_417	RT_1		nonGL	N-Acetyl-D-tryptophan M-H HMDB --- N-Acetyltryptophan M-H FiehnHILIC --- N-Acetyltryptophan M-H HMDB	Organic acids and derivatives	Carboxylic acids and derivatives	Amino acids, peptides, and analogues	HMDB0013713, HMDB0255052	N-Acetyltryptophan --- N-Acetyl-D-tryptophan								DZTHIGRZJZPRDV-LBPRGKRZSA-N, DZTHIGRZJZPRDV-UHFFFAOYNA-N, DZTHIGRZJZPRDV-UHFFFAOYSA-N	C13H14N2O3	1	M-H	245.093		5.45	5.52	83.1978	17.1249	82.2034	100	0.299457	0.0152499	0.0238619	0.100524	0.529983	0.44887	0.341838	0.2381	0.335943	0.0153566	0.900796	0.442509	0.121445	0.0677007	0.084378
Glutathione	Amino acids, peptides, and analogues	HILIC_NegMS1_598	RT_2		nonGL	Glutathione (reduced) M-H FiehnHILIC --- Glutathione M-H HMDB --- L-Glutathione (reduced form); LC-ESI-ITFT; MS2; m/z M-H MassBank	Organic acids and derivatives	Carboxylic acids and derivatives	Amino acids, peptides, and analogues	HMDB0000125	Glutathione								RWSXRVCMGQZWBV-UHFFFAOYNA-N, RWSXRVCMGQZWBV-WDSKDSINSA-N	C10H17N3O6S	1	M-H	306.08		13.71	13.68	71.8157	8.41327	100	100	-0.300517	0.0154334	0.0240857	-0.0938535	0.559766	0.460237	-0.577529	0.0457814	0.117049	-0.038788	0.754068	0.405282	-0.13312	0.0459586	0.0643161
PC 38:6	PC	RP_Pos, RP_NegMSMS_1040, 1111, 667		Y	nonGL	1-Palmitoyl-2-docosahexaenoyl-sn-glycero-3-phosphocholine M+H NIST --- PC 36:3 M+Na Atlas, PC 38:6 M+Na Atlas, PC 16:0_22:6 M+HCOO Atlas --- PC 18:2_20:4 M+HCOO Atlas	Lipids and lipid-like molecules	Glycerophospholipids	Glycerophosphocholines	HMDB0007991, HMDB0007991, HMDB0008148	PC(16:0/22:6(4Z,7Z,10Z,13Z,16Z,19Z)) --- PC(18:2(9Z,12Z)/20:4(8Z,11Z,14Z,17Z))	Glycerophospholipids [GP]	Glycerophosphocholines [GP01]	Diacylglycerophosphocholines [GP0101]	LMGP01012137, LMGP01010650 --- LMGP01012137 --- LMGP01012171	PC(16:0/22:6(4Z,7Z,10Z,13Z,16Z,19Z)), PC(16:0/22:6(4E,7E,10E,13E,16E,19E)) --- PC(16:0/22:6(4Z,7Z,10Z,13Z,16Z,19Z)) --- PC(18:2(9Z,12Z)/20:4(8Z,11Z,14Z,17Z))	PC 38:6	PC 16:0_22:6, PC 16:0_22:6 --- PC 18:2_20:4	GDWULUGDXGHJIJ-RWLIYIGXNA-N, IESVDEZGAHUQJU-ZLBXKVHBSA-N, KFEJJJVOBLNOCQ-WZUSAPNINA-N, JIEQRHOWVOAZRM-RHJXZECXNA-N, MSQRKPKYVJEFQD-QUAAIENRNA-N, IESVDEZGAHUQJU-SYGPSSPWNA-N, RUHBZJXWUDKAMZ-ODAJXHQSNA-N	C46H80NO8P	2	M+H --- M+Na, M+Na, M+HCOO	806.564, 828.5475, 850.5607	184.0718, 645.4809, 168.0415	5.71	5.71	99.7312	5.94015	100	100	-0.297309	0.0156159	0.024307	-0.283383	0.0732225	0.14038	-0.620836	0.0299237	0.0877016	-0.323798	0.00707911	0.0231543	-0.167748	0.0105848	0.0192386
Creatinine	Amino acids, peptides, and analogues	HILIC_Pos, HILIC_NegMSMS_93, 591, 26			nonGL	Creatinine M+H FiehnHILIC --- Creatinine M+H HMDB --- Creatinine M+H NIST, Creatinine 2M+H NIST, Creatinine M-H HMDB	Organic acids and derivatives	Carboxylic acids and derivatives	Amino acids, peptides, and analogues	HMDB0000562	Creatinine								DDRJAANPRJIHGJ-UHFFFAOYSA-N	C4H7N3O	1, 2	M+H, 2M+H, M-H	114.0659, 227.125, 112.0516	44.0491	10.86	10.89	86.2162	5.89526	89.916	100	0.297457	0.0156777	0.0243396	0.261343	0.0993463	0.172324	0.644249	0.0242675	0.0770771	0.255826	0.0349721	0.0654823	0.165171	0.0119852	0.0213723
Ala-Ala-Ala	Amino acids, peptides, and analogues	HILIC_PosMS1_1579	RT_2		nonGL	L-Ala-L-Ala-L-Ala 2M+H NIST	Organic acids and derivatives	Carboxylic acids and derivatives	Amino acids, peptides, and analogues	HMDB0248092	Ala-Ala-Ala								BYXHQQCXAJARLQ-ZLUOBGJFSA-N	C9H17N3O4	1	2M+H	463.255		7.88	7.89	20.8108	22.3275	61.3445	100	-0.294508	0.0160166	0.0247563	-0.283234	0.0716986	0.138587	-0.700162	0.0134196	0.0515873	-0.233377	0.0532433	0.0887594	-0.171142	0.00865014	0.0161152
PC O-44:5	PC-O	RP_Neg, RP_PosMSMS_751, 1273		Y	nonGL	PC O-24:1_20:4 M+HCOO Atlas, PC O-44:5 M+H Atlas													AGMNLZKCJUYNCT-SVAIAZDFNA-N, NKGFQIYBEVOJQB-HVVPRZNFNA-N	C52H96NO7P	2	M+HCOO, M+H	922.6907, 878.6955	303.2289, 184.0721	8.42	8.41	67.2043	10.9006	98.3471	100	-0.297369	0.0160291	0.0247563	-0.102971	0.5201	0.446939	-0.478197	0.0976633	0.195668	-0.0916284	0.456426	0.31534	-0.128533	0.0529445	0.0712492
Ala-Leu --- Ala-Ile	Amino acids, peptides, and analogues	HILIC_PosMSMS_507			nonGL	Ala-Ile M+H FiehnHILIC --- Ala-Ile M+H NIST --- DL-Alanyl-DL-leucine M+H HMDB --- Ile-Ala M+H NIST --- L-Alanyl-L-norleucine M+H NIST	Organic acids and derivatives	Carboxylic acids and derivatives	Amino acids, peptides, and analogues	HMDB0028900, HMDB0251509	Isoleucyl-Alanine --- DL-Alanyl-DL-leucine								RCFDOSNHHZGBOY-UHFFFAOYSA-N, RDIKFPRVLJLMER-UHFFFAOYSA-N, RSIYBPVKRVHPQK-RQJHMYQMSA-N, ZSOICJZJSRWNHX-UHFFFAOYNA-N, ZSOICJZJSRWNHX-UHFFFAOYSA-N	C9H18N2O3	1	M+H	203.139		9.76	9.76	63.2432	19.4934	99.1597	100	-0.298597	0.01618	0.0249248	-0.521264	0.000844182	0.00442805	-0.831721	0.0035932	0.018244	-0.377053	0.00175654	0.00832804	-0.221059	0.000717147	0.0019702
PE O-34:2	PE-O	RP_Neg, RP_PosMSMS_319, 716		Y	nonGL	PE O-16:1_18:1 M-H Atlas, PE O-16:1_18:1 M+H Atlas --- PE O-18:2_16:0 M+H Atlas													RFPQMVKZNQOUGY-KXYOHKLBNA-N, DTCDFXFLIGTQDK-BCTRXSSUNA-N, RFPQMVKZNQOUGY-KXYOHKLBNA-N	C39H76NO7P	2, 1	M-H, M+H	700.5286, 702.5391	281.247	6.745	6.695	67.2043	6.40179	100	100	-0.280267	0.0163146	0.0250673	-0.0589514	0.696985	0.507769	0.0237078	0.931288	0.635237	0.185924	0.107721	0.135513	-0.0892142	0.157194	0.160193
LPG 22:6	LPG	HILIC_NegMSMS_1162		Y	nonGL	LPG 22:6 M-H Atlas						Glycerophospholipids [GP]	Glycerophosphoglycerols [GP04]	Monoacylglycerophosphoglycerols [GP0405]	LMGP04050016	PG(22:6(4Z,7Z,10Z,13Z,16Z,19Z)/0:0)	LPG 22:6	LPG 22:6	MGCOSBZSSKOQOR-KUBAVDMBNA-N	C28H45O9P	1	M-H	555.275		8.45	8.38	60.4336	6.6499	100	100	0.294908	0.0166719	0.0255505	0.272148	0.0860611	0.15718	0.277414	0.337925	0.403851	0.0899587	0.463572	0.318083	0.146816	0.0261632	0.040408
L-Arginine	Amino acids, peptides, and analogues	HILIC_Pos, HILIC_NegMS1, MSMS_308, 406, 214	RT_1		nonGL	L-Arginine M+H-NH3 NIST, L-Arginine M+H HMDB --- L-Arginine M+H NIST, Arginine M-H FiehnHILIC --- L-(+)-Arginine; LC-ESI-QTOF; MS2; CE M-H MassBank --- N-Methyltryptamine M-H HMDB	Organic acids and derivatives	Carboxylic acids and derivatives	Amino acids, peptides, and analogues	HMDB0000517	L-Arginine								ODKSFYDXXFIFQN-BYPYZUCNSA-N, NCIKQJBVUNUXLW-UHFFFAOYSA-N, ODKSFYDXXFIFQN-BYPYZUCNSA-N, ODKSFYDXXFIFQN-UHFFFAOYNA-N	C6H14N4O2, C11H14N2, C6H14N4O2	1	M+H-NH3, M+H, M-H	158.0912, 175.1185, 173.1045		16.34	16.33	100	6.44674	100	100	0.290314	0.0175775	0.0268692	0.190375	0.228188	0.291701	0.292435	0.308481	0.383466	0.286489	0.0169705	0.0404154	0.13196	0.0445127	0.0625071
(2E)-Decenoyl-ACP	Amino acids, peptides, and analogues	HILIC_PosMS1_162			nonGL	(2E)-Decenoyl-ACP M+H HMDB	Organic acids and derivatives	Carboxylic acids and derivatives	Amino acids, peptides, and analogues	HMDB0062225	(2E)-Decenoyl-ACP								NILQLFBWTXNUOE-UHFFFAOYSA-N	C6H11NO2	1	M+H	130.097		10.24	10.24	60.5405	6.14823	89.0756	100	-0.291925	0.0176288	0.0268787	-0.101212	0.525472	0.448615	-0.368828	0.2009	0.306696	-0.11975	0.32774	0.263409	-0.120848	0.0679372	0.084378
5'-Methylthioadenosine	5'-deoxyribonucleosides	HILIC_Neg, HILIC_PosMSMS_566, 954			nonGL	5'-Methylthioadenosine M-H HMDB, 5'-Methylthioadenosine M+H HMDB --- 5'-S-Methylthioadenosine; LC-ESI-QTOF; MS2; CE M+H MassBank --- Adenosine, 5'-S-methyl-5'-thio- M+H NIST	Nucleosides, nucleotides, and analogues	5'-deoxyribonucleosides	5'-deoxy-5'-thionucleosides	HMDB0001173	5'-Methylthioadenosine								WUUGFSXJNOTRMR-IOSLPCCCSA-N	C11H15N5O3S	1	M-H, M+H	296.0834, 298.0964		4.86	4.92	90.8108	8.06473	100	100	0.284376	0.0178447	0.0271385	-0.0656552	0.6732	0.500616	0.307127	0.275756	0.364801	0.0178246	0.881658	0.438949	0.08614	0.18441	0.17945
ST 19:2;O2;GlcA	ST - Steroid conjugates	HILIC_NegMS1_1015		Y	nonGL	4-Androsten-17.beta.-ol-3-one glucosiduronate M-H NIST	Lipids and lipid-like molecules	Steroids and steroid derivatives	Steroidal glycosides	HMDB0003193, HMDB0258856	Testosterone glucuronide --- Testosterone 17b-(b-D-glucuronide)	Sterols [ST]	Steroid conjugates [ST05]	Glucuronides [ST0501]	LMST05010012	Testosterone glucuronide	ST 19:2;O2;GlcA		NIKZPECGCSUSBV-FWDQRILVSA-N	C25H36O8	1	M-H	463.23		11.67	11.65	63.1436	13.8952	100	100	-0.292959	0.0179641	0.0272506	-0.474561	0.00242324	0.0108085	-0.894127	0.00160973	0.0104558	-0.150827	0.219925	0.206463	-0.214577	0.0010042	0.00263728
L-Alanyl-beta-alanine	Amino acids, peptides, and analogues	HILIC_PosMSMS_217			nonGL	L-Alanyl-.beta.-alanine M+H-H2O NIST	Organic acids and derivatives	Carboxylic acids and derivatives	Amino acids, peptides, and analogues	HMDB0028680	Alanylalanine								LHMWTJPMNYKPGC-BYPYZUCNSA-N	C6H12N2O3	1	M+H-H2O	143.081		1.92	1.92	43.2432	18.0203	12.605	100	-0.289645	0.0181673	0.0274193	-0.192857	0.223383	0.289069	-0.259984	0.366844	0.421833	-0.165003	0.174985	0.179069	-0.130477	0.0476266	0.0664696
SM 34:2;O2	SM	RP_Pos, RP_NegMSMS_709, 405, 782		Y	nonGL	SM 18:2;2O/16:0 M+H Atlas --- SM 32:2;2O/2:0 M+H Atlas, SM 32:2;2O/2:0 M+HCOO Atlas, SM 34:2;2O M+Na Atlas													NSKVLNUBRQLCKS-NIAPBWAINA-N, RYPRHPLEPBYJJE-CUCSTAJMNA-N, NSKVLNUBRQLCKS-NIAPBWAINA-N, YRLHWLLUJAPBIQ-NFYLBXPENA-N	C39H77N2O6P	1, 2	M+H, M+HCOO, M+Na	701.5562, 745.551, 723.5381	168.043	5.03	5.03	67.7419	4.30859	100	100	-0.281191	0.0181513	0.0274193	-0.323178	0.0340016	0.0847674	-0.14702	0.599647	0.53178	-0.130862	0.268615	0.233003	-0.144905	0.0229553	0.0362998
LPC 22:5	LPC	RP_PosMSMS_469		Y	nonGL	LPC 22:5-SN1 M+H Atlas --- PC O-22:5 M+H Atlas	Lipids and lipid-like molecules	Glycerophospholipids	Glycerophosphocholines	HMDB0010403	LysoPC(22:5(7Z,10Z,13Z,16Z,19Z)/0:0)	Glycerophospholipids [GP]	Glycerophosphocholines [GP01]	Monoacylglycerophosphocholines [GP0105]	LMGP01050143	PC(22:5(7Z,10Z,13Z,16Z,19Z)/0:0)	LPC 22:5	LPC 22:5	BIEOSECQPGGZMF-WMPRHZDHNA-N, HCGYVCKZRVBPOW-QXPWYRSVNA-N	C30H52NO7P	1	M+H	570.352		2.62	2.69	64.2473	8.08166	86.7769	100	-0.279358	0.0183561	0.0276343	-0.367251	0.0150762	0.0453442	-0.562078	0.0414569	0.109273	-0.310554	0.00729405	0.0237073	-0.174198	0.00566662	0.011609
NAE 18:1	NAE	RP_PosMSMS_48		Y	nonGL	N-Oleoylethanolamine M+H NIST --- Oleoylethanolamide M+H HMDB	Organic nitrogen compounds	Organonitrogen compounds	Amines	HMDB0002088	Oleoylethanolamide	Fatty Acyls [FA]	Fatty amides [FA08]	N-acyl ethanolamides (endocannabinoids) [FA0804]	LMFA08040015	N-oleoyl ethanolamine	NAE 18:1		BOWVQLFMWHZBEF-KTKRTIGZSA-N	C20H39NO2	1	M+H	326.305		3.42	3.62	49.1935	18.9048	100	100	-0.28158	0.0184323	0.0276791	-0.15121	0.327895	0.361938	-0.517237	0.0633759	0.148838	-0.104404	0.379848	0.282671	-0.134557	0.0357843	0.0525448
LPC 22:6	LPC	RP_Pos, RP_NegMSMS_464, 493, 228		Y	nonGL	LPC 20:3 M+Na Atlas --- LPC 22:6-SN1 M+H Atlas --- LPC 22:6-SN2 M+H Atlas, LPC 22:6 M+Na Atlas, LPC 22:6 M+HCOO Atlas	Lipids and lipid-like molecules	Glycerophospholipids	Glycerophosphocholines	HMDB0010404	LysoPC(22:6(4Z,7Z,10Z,13Z,16Z,19Z)/0:0)	Glycerophospholipids [GP]	Glycerophosphocholines [GP01]	Monoacylglycerophosphocholines [GP0105]	LMGP01050056	PC(22:6(4Z,7Z,10Z,13Z,16Z,19Z)/0:0)	LPC 22:6	LPC 22:6	LSOWKZULVQWMLY-WSDBEMKQNA-N, XUDGAAFUMTTZCO-QNEBEIHSNA-N, LSOWKZULVQWMLY-WSDBEMKQNA-N	C30H50NO7P	1, 2	M+H --- M+Na, M+Na, M+HCOO	568.3373, 590.3193, 612.3309	327.231	2.51	2.53	70.4301	8.30563	100	100	-0.282574	0.0187483	0.0280829	-0.27043	0.0802048	0.149568	-0.493473	0.0786353	0.171758	-0.300969	0.010538	0.0291226	-0.154486	0.0161751	0.0269357
CAR 14:2	CAR	HILIC_PosMSMS_1288		Y	nonGL	CAR 14:2 M Atlas														C21H38NO4	1	M	368.278		1.97	1.97	98.3784	5.97562	96.6387	100	-0.277101	0.0189143	0.0282606	-0.115264	0.450844	0.415435	-0.310504	0.26227	0.356107	-0.119221	0.30975	0.252484	-0.11597	0.0678806	0.084378
Hydroxypyridine	Pyridines and derivatives	HILIC_PosMSMS_55			nonGL	3-Hydroxypyridine M+H NIST --- 4-Hydroxypyridine M+H NIST	Organoheterocyclic compounds	Pyridines and derivatives	Hydropyridines										GCNTZFIIOFTKIY-UHFFFAOYSA-N, GRFNBEZIAWKNCO-UHFFFAOYSA-N	C5H5NO	1	M+H	96.044		5.26	5.19	37.8378	23.0551	30.2521	98.9796	-0.28525	0.0191713	0.028573	-0.0499865	0.751574	0.52874	-0.19626	0.493117	0.48402	-0.279671	0.019324	0.0436087	-0.100772	0.125101	0.133971
DL-Norepinephrine	Benzenoids	HILIC_PosMS1_1157			nonGL	Bavachinin M+H NIST --- Bergamotin M+H NIST --- Bergaptin M+H HMDB --- DL-Norepinephrine 2M+H NIST --- Xanthotoxol geranyl ether M+H NIST	Benzenoids	Phenols	Benzenediols	HMDB0000216	Norepinephrine	Polyketides [PR]	Flavonoids [PK12]	Flavanones [PK1214]	LMPK12140040	Bavachinin			DBMJZOMNXBSRED-OQLLNIDSSA-N, DBMJZOMNXBSRED-UHFFFAOYSA-N, SFLSHLFXELFNJZ-UHFFFAOYSA-N, SOVNCTNQAWWYAQ-OQLLNIDSSA-N, VOCGSQHKPZSIKB-UHFFFAOYSA-N	C21H22O4	1	2M+H --- M+H	339.155		1.51	1.74	65.1351	13.335	42.0168	100	-0.276242	0.0195327	0.029039	-0.196043	0.199147	0.267571	-0.605523	0.0274842	0.0825656	-0.214019	0.0669346	0.101143	-0.145591	0.0214131	0.0340417
Glycine	Amino acids, peptides, and analogues	HILIC_NegMS1_2			nonGL	Glycine M-H HMDB	Organic acids and derivatives	Carboxylic acids and derivatives	Amino acids, peptides, and analogues	HMDB0000123	Glycine								DHMQDGOQFOQNFH-UHFFFAOYSA-N	C2H5NO2	1	M-H	74.025		14.35	14.73	89.4309	8.30682	100	100	0.281401	0.019746	0.029283	0.291087	0.0603272	0.121334	0.220594	0.436801	0.457079	0.208631	0.0803264	0.113672	0.143252	0.0266912	0.0409055
LPG 18:3	LPG	HILIC_NegMSMS_1087		Y	nonGL	LPG 18:3 M-H Atlas						Glycerophospholipids [GP]	Glycerophosphoglycerols [GP04]	Monoacylglycerophosphoglycerols [GP0405]	LMGP04050032	PG(18:3(9Z,12Z,15Z)/0:0)	LPG 18:3	LPG 18:3	AZCURGXIIHFART-PDBXOOCHNA-N	C24H43O9P	1	M-H	505.258		8.52	8.52	47.1545	8.49925	100	100	0.282492	0.0205799	0.0304439	0.233872	0.136732	0.211942	0.276121	0.334939	0.403851	0.0666649	0.583199	0.355386	0.136484	0.0369548	0.0538654
TAG O-60:9	TAG-O	RP_PosMS1_1471		Y	GL	TG O-16:0_22:3_22:6 M+Na Atlas --- TG O-16:0_22:4_22:5 M+Na Atlas --- TG O-16:1_22:2_22:6 M+Na Atlas --- TG O-16:1_22:3_22:5 M+Na Atlas --- TG O-16:1_22:4_22:4 M+Na Atlas --- TG O-16:2_22:1_22:6 M+Na Atlas --- TG O-16:2_22:2_22:5 M+Na Atlas --- TG O-16:2_22:3_22:4 M+Na Atlas --- TG O-16:3_22:0_22:6 M+Na Atlas --- TG O-16:3_22:1_22:5 M+Na Atlas --- TG O-16:3_22:2_22:4 M+Na Atlas --- TG O-16:3_22:3…	Lipids and lipid-like molecules	Glycerolipids	Triradylcglycerols	HMDB0055881	TG(22:5(7Z,10Z,13Z,16Z,19Z)/20:4(8Z,11Z,14Z,17Z)/O-18:0)								ACLLHPVVJBRRGG-OELJJGJZNA-N, AFHXCSADETYJCX-YBWSFGIXNA-N, AFMHSHWSRDLGPZ-VYXQMARKNA-N, AFPPGQLUNKFATR-MPUBHHKXNA-N, AGVDWMNKJATSAM-SGGDAOFANA-N, AJAHNLXPAZHORV-GUBIRTICNA-N, AQFWVJXYQBBCEQ-RSSXNWGJNA-N, AVEOMOMUHKMEPZ-QVBDKLLXNA-N, AWVWSMOAQUXAHG-HTJYJLSGNA-N, BMDNQFRPOWALKP-PUSGTXNYNA-N, BMIZFIUAWCYRBF-MOEBTABINA-N, BMKAUMBRKUXSEV-KENMBZHINA-N, BPNARGDPRIRWDT-GSMQYKADNA-N, BUMZOINJNJREAF-CJTXXYG…	C63H106O5	1	M+Na	965.788		11.59	11.63	55.1075	27.2292	49.5868	98.9796	0.262642	0.0206532	0.0304767	0.36447	0.0116556	0.0365656	0.571555	0.0301086	0.0878861	0.240677	0.0310797	0.0606097	0.169435	0.00491971	0.0103272
LPE 22:4	LPE	HILIC_Pos, HILIC_NegMSMS_1720, 1122		Y	nonGL	LPE 22:4 M+H Atlas, LPE 22:4 M-H Atlas --- Phosphatidylethanolamine lyso 22 M-H MassBank													RSVFMXVZJZRSQQ-LTKCOYKYNA-N, FGMFOVUNMMIBGB-SNPVRQPZNA-N, RSVFMXVZJZRSQQ-LTKCOYKYNA-N	C27H48NO7P, C27H44NO7P, C27H48NO7P	1	M+H, M-H	530.319, 528.3075		8.9	8.9	25.6757	13.6413	75.6303	100	-0.267016	0.0210251	0.030949	-0.381157	0.00960081	0.0314749	-0.70066	0.00869724	0.0366701	-0.161239	0.159712	0.169481	-0.180482	0.00323443	0.00730393
L-Histidine	Amino acids, peptides, and analogues	HILIC_Pos, HILIC_NegMSMS_297, 145			nonGL	Histidine M+H FiehnHILIC --- L-Histidine M+H HMDB --- L-Histidine M+H NIST, L-Histidine M-H HMDB --- L-Histidine M-H NIST	Organic acids and derivatives	Carboxylic acids and derivatives	Amino acids, peptides, and analogues	HMDB0000177	L-Histidine								HNDVDQJCIGZPNO-UHFFFAOYNA-N, HNDVDQJCIGZPNO-YFKPBYRVSA-N, HNDVDQJCIGZPNO-YFKPBYRVSA-N	C6H9N3O2	1	M+H, M-H	156.0763, 154.062		16.34	16.34	100	3.98359	100	100	0.285554	0.0221549	0.0325317	0.345967	0.0301985	0.0764489	0.363218	0.214142	0.31638	0.246349	0.0451152	0.078238	0.161654	0.015247	0.0256046
PC O-34:1	PC-O	RP_Pos, RP_NegMSMS_850, 916, 517		Y	nonGL	1-Hexadecyl-2-(9Z-octadecenoyl)-sn-glycero-3-phosphocholine M+H NIST, 1-Hexadecyl-2-(9Z-octadecenoyl)-sn-glycero-3-phosphocholine M+Na NIST, PC O-18:1_16:0 M+HCOO Atlas	Lipids and lipid-like molecules	Glycerophospholipids	Glycerophosphocholines	HMDB0013426	PC(O-18:1(9Z)/16:0)	Glycerophospholipids [GP]	Glycerophosphocholines [GP01]	1-alkyl,2-acylglycerophosphocholines [GP0102]	LMGP01020003, LMGP01020152	PC(O-16:0/18:1(9Z)), PC(O-18:1(9Z)/16:0)	PC O-34:1	PC O-16:0/18:1, PC O-18:1/16:0	SIEDNCDNGMIKST-IYEJTHTFSA-N, IQLHTKSHLGLPMG-MRCUWXFGNA-N	C42H84NO7P	1, 2	M+H, M+Na, M+HCOO	746.6009, 768.5811, 790.5966	709.5121, 255.231	6.88	6.87	69.086	2.91395	95.8678	100	-0.276075	0.02237	0.0327668	-0.0707642	0.651251	0.49251	-0.213555	0.451938	0.46306	0.147666	0.218136	0.206145	-0.102713	0.114818	0.126525
PA 34:2	PA	RP_NegMSMS_287		Y	nonGL	1-Hexadecanoyl-2-(9Z,12Z-octadecadienoyl)-sn-glycero-3-phosphoric acid M-H NIST --- 1-Palmitoyl-2-linoleoyl-sn-glycero-3-phosphate M-H NIST --- PA 16:0_18:2 M-H Atlas	Lipids and lipid-like molecules	Glycerophospholipids	Glycerophosphates	HMDB0007860	PA(16:0/18:2(9Z,12Z))	Glycerophospholipids [GP]	Glycerophosphates [GP10]	Diacylglycerophosphates [GP1001]	LMGP10010023	PA(16:0/18:2(9Z,12Z))	PA 34:2	PA 16:0_18:2	YQMUIZXKIKXZHD-BCTRXSSUNA-N, YQMUIZXKIKXZHD-BCTRXSSUSA-N, YQMUIZXKIKXZHD-UMKNCJEQSA-N	C37H69O8P	2	M-H	671.466	255.227	5.88	5.87	13.2075	11.4665	16.6667	100	-0.280619	0.0235481	0.034408	-0.255969	0.108267	0.18109	-0.466821	0.106638	0.208359	-0.0194307	0.874911	0.438751	-0.149972	0.0236259	0.0370653
Asymmetric dimethylarginine --- Symmetric dimethylarginine	Amino acids, peptides, and analogues	HILIC_PosMSMS_508			nonGL	ADMA M+H FiehnHILIC --- Asymmetric dimethylarginine M+H HMDB --- N,N-Dimethylarginine M+H FiehnHILIC --- NG,NG-Dimethyl-L-arginine M+H NIST --- Symmetric dimethylarginine M+H HMDB	Organic acids and derivatives	Carboxylic acids and derivatives	Amino acids, peptides, and analogues	HMDB0001539, HMDB0003334	Asymmetric dimethylarginine --- Symmetric dimethylarginine								HVPFXCBJHIIJGS-LURJTMIESA-N, NWGZOALPWZDXNG-UHFFFAOYNA-N, YDGMGEXADBMOMJ-LURJTMIESA-N, YDGMGEXADBMOMJ-UHFFFAOYNA-N	C8H18N4O2	1	M+H	203.15		15.38	15.36	74.0541	3.99499	100	100	0.280958	0.0238498	0.0347635	0.236618	0.139391	0.214541	0.143444	0.62354	0.540341	0.199367	0.104822	0.134086	0.129467	0.0524052	0.0708432
PC 34:1;O3	OxPC	RP_NegMSMS_670		Y	nonGL	PC 16:0_18:1;3O M+HCOO Atlas													MDSQKPDNZVPNQN-QNEJGDQONA-N	C42H82NO11P	2	M+HCOO	852.56	792.54	3.4	3.39	5.12129	8.51239	15.8333	100	-0.275797	0.0246902	0.0359007	-0.330862	0.0351319	0.0862732	-0.175937	0.54186	0.504746	-0.299215	0.0127508	0.0326209	-0.146249	0.0259471	0.0401782
Inositol	Alcohols and polyols	HILIC_NegMSMS_235			nonGL	Inositol M-H FiehnHILIC --- Myoinositol M-H FiehnHILIC --- allo-Inositol M-H HMDB	Organic oxygen compounds	Organooxygen compounds	Alcohols and polyols	HMDB0000211	myo-Inositol								CDAISMWEOUEBRE-OQYPVSDDSA-N, CDAISMWEOUEBRE-UHFFFAOYSA-N	C6H12O6	1	M-H	179.057		14.18	14.12	28.4553	9.62081	88.1356	100	0.267867	0.0249684	0.036217	0.226232	0.141315	0.214768	0.199597	0.476797	0.476127	0.222043	0.0593985	0.0947888	0.12689	0.0477204	0.0664696
PC 38:7	PC	RP_Pos, RP_NegMSMS_1106, 665		Y	nonGL	PC 38:7 M+Na Atlas, PC 16:1_22:6 M+HCOO Atlas	Lipids and lipid-like molecules	Glycerophospholipids	Glycerophosphocholines	HMDB0008023	PC(16:1(9Z)/22:6(4Z,7Z,10Z,13Z,16Z,19Z))	Glycerophospholipids [GP]	Glycerophosphocholines [GP01]	Diacylglycerophosphocholines [GP0101]	LMGP01010696	PC(16:1(9Z)/22:6(4Z,7Z,10Z,13Z,16Z,19Z))	PC 38:7	PC 16:1_22:6	SUXHMUSOGHOWMU-ZDNAGYMQNA-N, WEKYSOYSMAUCCS-PFZRPMEUNA-N, DLRNZUPJXRVWRW-LKDYKOESNA-N	C46H78NO8P	1, 2	M+Na, M+HCOO	826.5326, 848.5439	253.213	5.215	5.195	67.2043	5.41097	100	100	-0.266334	0.0252512	0.0365383	-0.273828	0.0730395	0.14038	-0.579891	0.0358931	0.100694	-0.326584	0.00482796	0.0170892	-0.155037	0.0145874	0.0247761
SM 35:1;O2	SM	RP_Neg, RP_PosMSMS_440, 765, 829		Y	nonGL	SM 33:1;2O/2:0 M+HCOO Atlas, SM 33:1;2O/2:0 M+H Atlas --- SM 9:1;2O/26:0 M+H Atlas, SM 35:1;2O M+Na Atlas													IQBXAJVTUGNXLM-JEIPZWNWNA-N, IQBXAJVTUGNXLM-JEIPZWNWNA-N, MRFQLWWFXNXVPG-QOSDPKFLNA-N, NZVSGOQOFUVMHA-QOSDPKFLNA-N	C40H81N2O6P	2, 1	M+HCOO, M+H, M+Na	761.5807, 717.5869, 739.569	168.0406, 184.0724	5.79	5.77	68.2796	11.4556	100	100	-0.271685	0.0254843	0.0367863	-0.406229	0.00852854	0.0286765	-0.549889	0.0519018	0.128593	-0.0524679	0.66463	0.377179	-0.178191	0.00576999	0.0117803
PE 38:7	PE	RP_NegMSMS_435		Y	nonGL	PE 16:1_22:6 M-H Atlas	Lipids and lipid-like molecules	Glycerophospholipids	Glycerophosphoethanolamines	HMDB0008979	PE(16:1(9Z)/22:6(4Z,7Z,10Z,13Z,16Z,19Z))	Glycerophospholipids [GP]	Glycerophosphoethanolamines [GP02]	Diacylglycerophosphoethanolamines [GP0201]	LMGP02011216	PE(16:1(9Z)/22:6(4Z,7Z,10Z,13Z,16Z,19Z))	PE 38:7	PE 16:1_22:6	PMUXXFUNXMXIFC-LSTLUVPYNA-N	C43H72NO8P	2	M-H	760.492	253.215	5.27	5.26	13.4771	14.4718	41.6667	100	-0.265225	0.0257589	0.0370928	-0.107019	0.486598	0.431146	-0.414986	0.135315	0.245113	-0.0981448	0.406321	0.294504	-0.116688	0.0678265	0.084378
Indolepyruvate	Indoles and derivatives	HILIC_PosMS1_509			nonGL	Indole-3-pyruvic acid M+H FiehnHILIC	Organoheterocyclic compounds	Indoles and derivatives	Indolyl carboxylic acids and derivatives	HMDB0060484	Indolepyruvate								RSTKLPZEZYGQPY-UHFFFAOYSA-N	C11H9NO3	1	M+H	204.069		5.48	5.49	29.1892	10.4421	62.1849	100	-0.275532	0.0265605	0.0380632	-0.281002	0.0779942	0.14695	-0.558542	0.0532206	0.131409	-0.243237	0.0466866	0.0803053	-0.157789	0.0172967	0.0281748
LPC 20:1	LPC	RP_PosMSMS_475		Y	nonGL	1-O-Hexadecyl-2-O-(2E-butenoyl)-sn-glyceryl-3-phosphocholine M+Na NIST --- LPC 20:1 M+Na Atlas	Lipids and lipid-like molecules	Glycerophospholipids	Glycerophosphocholines	HMDB0010391	LysoPC(20:1(11Z)/0:0)	Glycerophospholipids [GP]	Glycerophosphocholines [GP01]	Monoacylglycerophosphocholines [GP0105]	LMGP01050131	PC(20:1(11Z)/0:0)	LPC 20:1	LPC 20:1	SRZBVCCSIMMDOV-QPSGOUHRSA-N, YYSFWGQAKJTHRE-SEYXRHQNNA-N	C28H56NO7P	1	M+Na	572.367		3.42	3.39	23.9247	22.1092	54.5455	100	-0.273972	0.02654	0.0380632	-0.220318	0.165991	0.239198	-0.214514	0.459292	0.467057	-0.143553	0.241141	0.216727	-0.128392	0.0526675	0.0710368
LPG 16:1	LPG	HILIC_NegMSMS_1049		Y	nonGL	LPG 16:1 M-H Atlas						Glycerophospholipids [GP]	Glycerophosphoglycerols [GP04]	Monoacylglycerophosphoglycerols [GP0405]	LMGP04050013	PG(16:1(9Z)/0:0)	LPG 16:1	LPG 16:1	JSKJPUCKVIJTKI-FPLPWBNLNA-N	C22H43O9P	1	M-H	481.258		8.67	8.56	52.5745	7.34376	100	100	0.271747	0.0270813	0.0387165	0.19471	0.219251	0.285798	0.257557	0.371687	0.423648	0.0915479	0.453687	0.31471	0.125556	0.0570374	0.0757314
Nicotinuric acid	Amino acids, peptides, and analogues	HILIC_PosMS1_424			nonGL	Nicotinoylglycine M+H FiehnHILIC --- Nicotinuric acid M+H HMDB --- Nicotinuric acid M+H NIST	Organic acids and derivatives	Carboxylic acids and derivatives	Amino acids, peptides, and analogues	HMDB0003269	Nicotinuric acid								ZBSGKPYXQINNGF-UHFFFAOYSA-N	C8H8N2O3	1	M+H	181.061		7.61	7.62	29.1892	20.3327	58.8235	100	-0.273177	0.027637	0.0394165	-0.27119	0.0885877	0.160899	-0.104808	0.719099	0.568487	-0.205098	0.0939933	0.123914	-0.131249	0.0484358	0.0673088
Suberylglycine	Amino acids, peptides, and analogues	HILIC_PosMS1_615			nonGL	Clasto-lactacystin .beta.-lactone M+H+H2O NIST --- Suberylglycine M+H HMDB	Organic acids and derivatives	Carboxylic acids and derivatives	Amino acids, peptides, and analogues	HMDB0000953	Suberylglycine								FWPWHHUJACGNMZ-OECXWRGYSA-N, HXATVKDSYDWTCX-UHFFFAOYSA-N	C10H17NO5	1	M+H --- M+H+H2O	232.116		12.91	12.91	27.8378	10.4841	44.5378	100	-0.27386	0.0277164	0.0394353	-0.222838	0.164143	0.237579	-0.195466	0.503256	0.485848	-0.214868	0.0800277	0.113619	-0.127789	0.0555562	0.0739294
Glycerol 1-myristate	Xenobiotics	RP_PosMSMS_3			nonGL	Glycerol 1-myristate M+H NIST	Lipids and lipid-like molecules	Glycerolipids	Monoradylglycerols	HMDB0304951	Glycerol 1-myristate								DCBSHORRWZKAKO-UHFFFAOYSA-N	C17H34O4	1	M+H	303.252		3.04	3.04	97.3118	8.41456	99.1736	100	-0.258434	0.0286363	0.0406472	-0.136068	0.372268	0.378343	-0.154386	0.577622	0.522282	-0.153214	0.190126	0.18968	-0.105974	0.0951712	0.109956
3'-O-Methylguanosine	Purine nucleosides	HILIC_NegMSMS_569			nonGL	2'-O-Methylguanosine M-H FiehnHILIC --- 3'-O-Methylguanosine M-H FiehnHILIC	Nucleosides, nucleotides, and analogues	Purine nucleosides		HMDB0006038	3'-O-Methylguanosine								OVYNGSFVYRPRCG-UHFFFAOYNA-N, UYARPHAXAJAZLU-UHFFFAOYNA-N	C11H15N5O5	1	M-H	296.099		8.86	8.86	70.7317	8.47812	99.1525	100	-0.268486	0.0287834	0.0407589	-0.0557828	0.725515	0.518756	-0.489383	0.087216	0.181386	-0.0925181	0.448218	0.312595	-0.112594	0.0880698	0.103558
Pyridoxal	Pyridines and derivatives	HILIC_PosMSMS_362	RT_1		nonGL	Pyridoxal M+H NIST	Organoheterocyclic compounds	Pyridines and derivatives	Pyridine carboxaldehydes	HMDB0001545	Pyridoxal								RADKZDMFGJYCBB-UHFFFAOYSA-N	C8H9NO3	1	M+H	168.065		9.3	9.3	38.6486	18.833	22.6891	100	0.266814	0.0291824	0.0412261	0.0426692	0.787506	0.541242	0.562824	0.0476964	0.120661	0.0345046	0.776775	0.412566	0.113724	0.0836652	0.0993583
gamma-Aminobutyric acid --- 3-Aminoisobutanoic acid --- Dimethylglycine	Amino acids, peptides, and analogues	HILIC_NegMS1_15	RT_2		nonGL	.gamma.-Aminobutyric acid M-H NIST --- 2-Aminoisobutyric acid M-H HMDB --- 3-Aminoisobutanoic acid M-H HMDB --- D-alpha-Aminobutyric acid M-H HMDB --- DL-3-Aminoisobutyric acid; LC-ESI-QTOF; MS2; CE M-H MassBank --- Dimethylglycine M-H HMDB --- N,N-Dimethylglycine M-H FiehnHILIC --- N-Methylalanine M-H FiehnHILIC --- alpha-Aminobutyric acid M-H HMDB --- gamma-Aminobutyric acid M-H FiehnHILIC --- …	Organic acids and derivatives	Carboxylic acids and derivatives	Amino acids, peptides, and analogues	HMDB0000112, HMDB0003911, HMDB0000092	Dimethylglycine --- gamma-Aminobutyric acid --- 3-Aminoisobutanoic acid	Fatty Acyls [FA]	Fatty Acids and Conjugates [FA01]	Amino fatty acids [FA0110]	LMFA01100039 --- LMFA01100043 --- LMFA01100053 --- LMFA01100054	2-amino-isobutyric acid --- 2R-amino-butanoic acid --- 3-amino-isobutanoic acid --- 4-amino-butanoic acid			BTCSSZJGUNDROE-UHFFFAOYSA-N, FFDGPVCHZBVARC-UHFFFAOYSA-N, FUOOLUPWFVMBKG-UHFFFAOYSA-N, GDFAOVXKHJXLEI-UHFFFAOYNA-N, QCHPKSFMDHPSNR-UHFFFAOYNA-N, QCHPKSFMDHPSNR-UHFFFAOYSA-N, QWCKQJZIFLGMSD-GSVOUGTGSA-N, QWCKQJZIFLGMSD-UHFFFAOYSA-N	C4H9NO2	1	M-H	102.056		14.78	14.71	18.6992	26.2732	31.3559	98.9796	0.258594	0.0292786	0.0412642	0.138435	0.366142	0.376331	0.219777	0.429608	0.451518	0.167282	0.154057	0.165519	0.109914	0.084725	0.0998214
L-Tyrosine	Amino acids, peptides, and analogues	HILIC_Neg, HILIC_PosMS1, MSMS_169, 242, 430, 342			nonGL	2-Coumaric acid; LC-ESI-QTOF; MS2; CE M-H MassBank --- 2-Hydroxycinnamic acid M-H FiehnHILIC --- 2-Hydroxycinnamic acid M-H HMDB --- 4-Coumaric acid; LC-ESI-QTOF; MS2; CE M-H MassBank --- 4-Hydroxycinnamic acid M-H FiehnHILIC --- 4-Hydroxycinnamic acid M-H HMDB --- L-Tyrosine M-H-NH3 NIST --- M-Coumaric acid M-H FiehnHILIC --- P-Coumaric acid M-H FiehnHILIC --- Phenylpyruvic acid M-H FiehnHILIC -…	Organic acids and derivatives	Carboxylic acids and derivatives	Amino acids, peptides, and analogues	HMDB0250803, HMDB0000158, HMDB0003831	L-Tyrosine --- Beta-Tyrosine --- D-Tyrosine								BTNMPGBKDVTSJY-UHFFFAOYSA-N, JVGVDSSUAVXRDY-UHFFFAOYSA-N, KKSDGJDHHZEWEP-UHFFFAOYSA-N, NGSWKAQJJWESNS-UHFFFAOYSA-N, NGSWKAQJJWESNS-ZZXKWVIFSA-N, OUYCCCASQSFEME-UHFFFAOYSA-N, PMOWTIHVNWZYFI-AATRIKPKSA-N, PMOWTIHVNWZYFI-UHFFFAOYSA-N, JYPHNHPXFNEZBR-UHFFFAOYSA-N, JZKXXXDKRQWDET-UHFFFAOYNA-N, OUYCCCASQSFEME-QMMMGPOBSA-N, OUYCCCASQSFEME-UHFFFAOYSA-N, OUYCCCASQSFEME-UHFFFAOYNA-N, OUYCCCASQSFEME-UHFFFAO…	C9H10O4, C9H11NO3, C9H8O3, C9H11NO3, C9H10O4, C9H11NO3	1, 2	M-H --- M-H-H2O --- M-H-NH3, M-H, M+H, M+H-H2O --- M+H-NH3	163.0396, 180.0662, 182.0808, 165.0542	136.074	12.56	12.58	100	6.42829	100	100	-0.26795	0.0294197	0.0412679	-0.042415	0.78991	0.541758	-0.530668	0.063765	0.149265	-0.0594811	0.62682	0.368036	-0.112293	0.0895374	0.10487
LPG 17:0	LPG	HILIC_NegMSMS_1078		Y	nonGL	LPG 17:0 M-H Atlas						Glycerophospholipids [GP]	Glycerophosphoglycerols [GP04]	Monoacylglycerophosphoglycerols [GP0405]	LMGP04050033	PG(17:0/0:0)	LPG 17:0	LPG 17:0	WVMGNTLVBBZPKS-UHFFFAOYNA-N	C23H47O9P	1	M-H	497.289		8.47	8.47	27.9133	8.94846	83.8983	100	0.268736	0.0294052	0.0412679	0.180466	0.256668	0.310113	0.394582	0.171185	0.279235	0.133011	0.276995	0.238182	0.129488	0.0502833	0.0689125
LPG 20:4	LPG	HILIC_NegMSMS_1125		Y	nonGL	LPG 20:4 M-H Atlas													IBHAQCAKDSJHDI-LTKCOYKYNA-N	C26H45O9P	1	M-H	531.274		8.48	8.42	65.3117	7.53609	100	100	0.26834	0.0302391	0.0423118	0.150392	0.346752	0.369016	0.159603	0.58293	0.524178	0.071068	0.563657	0.347347	0.111596	0.0936758	0.108861
Lycopene	Xenobiotics	RP_PosMS1_414	RT_1		nonGL	Lycopene M+H HMDB	Lipids and lipid-like molecules	Prenol lipids	Tetraterpenoids	HMDB0003000	Lycopene	Prenol Lipids [PR]	Isoprenoids [PR01]	C40 isoprenoids (tetraterpenes) [PR0107]	LMPR01070257	Lycopene			OAIJSZIZWZSQBC-GYZMGTAESA-N	C40H56	1	M+H	537.44		9.02	9.02	61.5591	7.11646	91.7355	100	0.268735	0.0304478	0.0423118	0.211312	0.186258	0.257646	0.157336	0.589311	0.527072	0.106013	0.38978	0.286942	0.122273	0.066558	0.0840661
N6-Methyladenosine	Purine nucleosides	HILIC_PosMSMS_857	RT_2		nonGL	1-Methyladenosine M+H FiehnHILIC --- 1-Methyladenosine M+H NIST --- N6-Methyladenosine M+H HMDB	Nucleosides, nucleotides, and analogues	Purine nucleosides		HMDB0004044	N6-Methyladenosine								GFYLSDSUCHVORB-FCKMSMMTSA-N, GFYLSDSUCHVORB-UHFFFAOYNA-N, VQAYFKKCNSOZKM-IOSLPCCCSA-N	C11H15N5O4	1	M+H	282.119		11.96	11.99	97.8378	4.0865	99.1597	100	-0.264697	0.0304187	0.0423118	-0.206981	0.188663	0.259876	-0.234122	0.414175	0.445022	-0.275069	0.0217181	0.0475089	-0.124445	0.0577875	0.0760498
PC 34:2;O2	OxPC	RP_NegMSMS_638		Y	nonGL	PC 16:0_18:2;2O M+HCOO Atlas													GMJLRVXYZZADNS-CRWFHCLENA-N	C42H80NO10P	2	M+HCOO	834.549	774.528	3.87	3.88	25.3369	6.20341	78.3333	100	-0.267994	0.0304299	0.0423118	-0.311364	0.0494239	0.106249	-0.18815	0.517209	0.491305	-0.25184	0.0384844	0.0705255	-0.141248	0.032958	0.0491206
NAE 20:3	NAE	RP_PosMS1_98		Y	nonGL	N-(5Z,8Z,11Z-Eicosatrienoyl)ethanolamine M+H NIST --- N-(8Z,11Z,14Z-Eicosatrienoyl)ethanolamine M+H NIST --- NAE 20:3 M+H Atlas --- Prostaglandin F2.alpha. dimethylamine M+H-H2O NIST	Organic nitrogen compounds	Organonitrogen compounds	Amines	HMDB0013625	Dihomo-gamma-linolenoylethanolamide	Fatty Acyls [FA]	Eicosanoids [FA03] --- Fatty amides [FA08]	N-acyl ethanolamides (endocannabinoids) [FA0804] --- Prostaglandins [FA0301]	LMFA03010114 --- LMFA08040005 --- LMFA08040011 --- LMFA08040037	Anandamide (20:3, n-3) --- Dihomo-gamma-linolenoyl-EA --- Mead Acid-EA --- PGE2alpha dimethyl amine	NAE 20:3		IGERBKTWMBMXMC-PDBXOOCHSA-N, ULQWKETUACYZLI-QNEBEIHSSA-N, VNLQPSLXSAMMMJ-PIOKUXGXSA-N, YKGQBEGMUSSPFY-YOILPLPUSA-N	C22H39NO2, C22H41NO3	1	M+H --- M+H-H2O	350.304		3.76	3.75	74.1935	25.8847	100	100	-0.254764	0.0307644	0.0426524	-0.281578	0.0623898	0.124338	-0.652088	0.0167394	0.0599976	-0.245187	0.0342882	0.0644352	-0.15693	0.0124361	0.0218055
PC O-32:0	PC-O	RP_Pos, RP_NegMSMS_776, 450		Y	nonGL	PC O-32:0 M+H Atlas, PC O-16:0_16:0 M+HCOO Atlas						Glycerophospholipids [GP]	Glycerophosphocholines [GP01]	1-alkyl,2-acylglycerophosphocholines [GP0102]	LMGP01020029	PC(O-16:0/16:0)	PC O-32:0	PC O-16:0/16:0	AXEPEEXNGOBZFB-UHFFFAOYNA-N, WOTHHEHCEYHCFE-UHFFFAOYNA-N	C40H82NO7P	2	M+H, M+HCOO	720.5853, 764.5801	184.0701, 255.2307	6.8	6.755	83.6022	4.06049	100	100	-0.264907	0.0316222	0.0437399	-0.14334	0.367609	0.376331	-0.147008	0.611331	0.535554	0.138814	0.255774	0.225938	-0.108707	0.100941	0.114623
LPC 20:3	LPC	RP_Neg, RP_PosMSMS_203, 433		Y	nonGL	LPC 20:3 M+HCOO Atlas, LPC 20:3-SN1 M+H Atlas --- PC O-20:3 M+H Atlas													XUDGAAFUMTTZCO-QNEBEIHSNA-N, BLELCRPIGKRWIH-ORZIMQNZNA-N, XUDGAAFUMTTZCO-QNEBEIHSNA-N	C28H52NO7P	2	M+HCOO, M+H	590.3461, 546.3535	305.2457, 184.0716	2.76	2.82	48.3871	13.1608	40.4959	100	-0.258288	0.0323104	0.0445884	-0.224902	0.147196	0.220851	-0.246662	0.383019	0.428142	-0.140745	0.239004	0.216312	-0.126423	0.0505647	0.0691391
PE 39:6	PE	RP_PosMSMS_951		Y	nonGL	PE 17:0_22:6 M+H Atlas --- PE 19:2_20:4 M+H Atlas						Glycerophospholipids [GP]	Glycerophosphoethanolamines [GP02]	Diacylglycerophosphoethanolamines [GP0201]	LMGP02011210	PE(17:0/22:6(4Z,7Z,10Z,13Z,16Z,19Z))	PE 39:6	PE 17:0_22:6	VOHFIDPWQQXEIA-YRKKIBHTNA-N, WVGREBRFGJNLSB-KAFSZNKPNA-N	C44H76NO8P	1	M+H	778.534		6	5.97	31.4516	10.9198	89.2562	100	-0.246906	0.0323852	0.0445884	-0.285857	0.0529263	0.110166	-0.446006	0.0971664	0.195668	-0.242216	0.0325013	0.0621525	-0.144467	0.0189036	0.0306239
Asp-Ty	Amino acids, peptides, and analogues	HILIC_PosMS1_949			nonGL	2'-Hydroxy-2,5,6'-trimethoxychalcone M+H-H2O NIST --- 2-Hydroxy-2',4',6'-trimethoxychalcone M+H-H2O NIST --- 3,4-Dihydrocoumarin 2M+H NIST --- 3-(3,4-Dimethoxyphenyl)-4-methylcoumarin M+H NIST --- 4',7-Dimethoxy-8-methylisoflavone M+H NIST --- 6-Ethoxy-3-(4-hydroxyphenyl)-4-methylcoumarin M+H NIST --- 6-Methoxy-3-(4-methoxyphenyl)-4-methylcoumarin M+H NIST --- 7-Ethoxy-3-(4-methoxyphenyl)coumarin…	Organic acids and derivatives	Carboxylic acids and derivatives	Amino acids, peptides, and analogues	HMDB0028765	Aspartyl-Tyrosine								FICGIPLFVHBWRP-CMDGGOBGSA-N, IGGNNEJKAJQXOV-VQHVLOKHSA-N, KXVTZKSYTLNZLN-UHFFFAOYSA-N, MOBDZHABRVPJCH-UHFFFAOYSA-N, NALWOULWGHTVDA-UHFFFAOYSA-N, PJVVLWSZQQCBRZ-UHFFFAOYSA-N, QKTZSGVZWBCCAP-UHFFFAOYSA-N, QZOSVNLXLSNHQK-UHFFFAOYSA-N, RFKYCUZYUASZBI-UHFFFAOYSA-N, VMUXSMXIQBNMGZ-UHFFFAOYSA-N, XTQFXRPKOWXOQI-UHFFFAOYSA-N	C13H16N2O6, C9H8O2	1	2M+H --- M+H --- M+H-H2O	297.111		8.26	8.26	38.9189	13.3545	99.1597	100	-0.262644	0.0325633	0.0447303	-0.14947	0.345806	0.369016	-0.31513	0.273155	0.362691	-0.172459	0.155783	0.167026	-0.118082	0.0734248	0.0904399
beta-Estradiol 3,17-disulfate	ST - Steroids derivatives	HILIC_NegMS1_924		Y	nonGL	.beta-Estradiol 3,17-disulfate M-H NIST	Lipids and lipid-like molecules	Steroids and steroid derivatives	Sulfated steroids	HMDB0041620	17-Beta-Estradiol-3,17-beta-sulfate	Sterols [ST]	Steroid conjugates [ST05]	Sulfates [ST0502]	LMST05020041	17-Beta-Estradiol-3,17-beta-sulfate			VPLAJGAMHNQZIY-PAOLREHBSA-N	C18H24O8S2	1	M-H	431.082		6.39	6.26	46.0705	23.4812	38.9831	96.9388	0.250095	0.032679	0.0447859	0.0462148	0.760195	0.532519	-0.00547337	0.984118	0.64899	0.0899778	0.438889	0.308587	0.0793234	0.209015	0.196851
TAG 56:8	TAG	RP_PosMSMS_1384, 1396		Y	GL	TG 16:0_18:2_22:6 M+NH4 Atlas, TG 16:0_18:2_22:6 M+Na Atlas --- TG 16:0_20:4_20:4 M+Na Atlas	Lipids and lipid-like molecules	Glycerolipids	Triradylcglycerols	HMDB0044275, HMDB0044552	TG(16:0/18:2(9Z,12Z)/22:6(4Z,7Z,10Z,13Z,16Z,19Z)) --- TG(16:0/20:4(8Z,11Z,14Z,17Z)/20:4(8Z,11Z,14Z,17Z))	Glycerolipids [GL]	Triradylglycerols [GL03]	Triacylglycerols [GL0301]	LMGL03010999	TG(16:0/18:2(9Z,12Z)/22:6(4Z,7Z,10Z,13Z,16Z,19Z))[iso6]	TG 56:8	TG 16:0_18:2_22:6	RDZINTYLBOTMAU-BUNKRMPENA-N, RDZINTYLBOTMAU-BUNKRMPENA-N, USBFXACLNGOAGV-UTDWZGIUNA-N	C59H98O6	2, 1	M+NH4, M+Na	920.7628, 925.7199	647.503	10.39	10.37	88.7097	3.81289	97.5207	100	-0.263753	0.0330757	0.0452258	-0.235306	0.139097	0.214541	-0.654809	0.0221953	0.0732247	-0.259889	0.0324013	0.0621525	-0.151529	0.0217654	0.0345098
Phenyl glucuronide	Carbohydrates and carbohydrate conjugates	HILIC_PosMS1_928	RT_2		nonGL	Phenyl glucuronide M+Na NIST	Organic oxygen compounds	Organooxygen compounds	Carbohydrates and carbohydrate conjugates	HMDB0060014	Phenol glucuronide								WVHAUDNUGBNUDZ-GOVZDWNOSA-N	C12H14O7	1	M+Na	293.063		12.23	12.23	61.6216	5.16804	99.1597	100	-0.264623	0.0334863	0.0456824	-0.250907	0.116482	0.189513	-0.294266	0.312542	0.384536	-0.232208	0.0580065	0.093678	-0.135328	0.0422362	0.0598088
Glutamine	Amino acids, peptides, and analogues	HILIC_Neg, HILIC_PosMSMS_108, 151, 241			nonGL	Alanylglycine M-H HMDB --- Glutamine M-H FiehnHILIC --- L-Glutamine M-H HMDB, D-Pyroglutamic acid M+H NIST --- L-Glutamic acid M+H-H2O NIST --- L-Glutamine M+H-NH3 NIST --- Pyroglutamic acid M+H HMDB, Glutamine M+H FiehnHILIC --- L-Glutamine M+H HMDB --- L-Glutamine M+H NIST	Organic acids and derivatives	Carboxylic acids and derivatives	Amino acids, peptides, and analogues	HMDB0000641, HMDB0060475	L-Glutamine --- DL-Glutamate								CXISPYVYMQWFLE-VKHMYHEASA-N, ZDXPYRJPNDTMRX-UHFFFAOYNA-N, ZDXPYRJPNDTMRX-VKHMYHEASA-N, ODHCTXKNWHHXJC-GSVOUGTGSA-N, ODHCTXKNWHHXJC-VKHMYHEASA-N, WHUUTDBJXJRKMK-UHFFFAOYSA-N, ZDXPYRJPNDTMRX-GSVOUGTGSA-N, ZDXPYRJPNDTMRX-GSVOUGTGSA-N, ZDXPYRJPNDTMRX-UHFFFAOYNA-N, ZDXPYRJPNDTMRX-VKHMYHEASA-N	C5H10N2O3, C5H10N2O3, C5H7NO3, C5H9NO4	1	M-H, M+H --- M+H-H2O --- M+H-NH3, M+H	145.0616, 130.0494, 147.0762		14.19	14.2	85.3659	8.45978	66.3866	100	0.263872	0.0336109	0.0457476	0.17483	0.274762	0.318965	0.333164	0.25145	0.347969	0.0599953	0.626853	0.368036	0.12384	0.0629925	0.0804146
LPG 22:5	LPG	HILIC_NegMSMS_1164		Y	nonGL	LPG 22:5 M-H Atlas													SFEASCDNRVXVFA-JLNKQSITNA-N	C28H47O9P	1	M-H	557.289		8.33	8.35	44.4444	7.69181	100	100	0.260911	0.0338298	0.0459073	0.189795	0.230724	0.293176	0.237265	0.410222	0.443424	0.0620645	0.611413	0.363723	0.120515	0.0676932	0.084378
SM 34:1;O2	SM	RP_Pos, RP_NegMSMS_786, 718, 414		Y	nonGL	SM 34:1;2O M+Na Atlas, SM 18:1;2O/16:0 M+H Atlas --- SM 32:1;2O/2:0 M+H Atlas, SM 18:1;2O/16:0 M+HCOO Atlas --- SM 32:1;2O/2:0 M+HCOO Atlas	Lipids and lipid-like molecules	Sphingolipids	Phosphosphingolipids	HMDB0010169	SM(d18:1/16:0)	Sphingolipids [SP]	Phosphosphingolipids [SP03]	Ceramide phosphocholines (sphingomyelins) [SP0301]	LMSP03010003	SM(d18:1/16:0)	SM 34:1;O2	SM 18:1;O2/16:0	NENCNFRZZCQXJU-ZCXUNETKNA-N, QURASRMYHHBMAP-ULIFNZDWNA-N, RWKUXQNLWDTSLO-NHQGMKOONA-N	C39H79N2O6P	1, 2	M+Na, M+H, M+HCOO	725.5538, 703.571, 747.5654	184.0709, 281.2453	5.51	5.49	98.1183	3.39045	100	100	-0.263273	0.0338822	0.0459073	-0.238393	0.134954	0.210123	-0.0195691	0.946452	0.64013	0.0203867	0.868762	0.436311	-0.118129	0.0761749	0.0933317
L-Cystine	Amino acids, peptides, and analogues	HILIC_PosMSMS_642			nonGL	Cystine M+H HMDB --- L-Cystine M+H HMDB --- L-Cystine M+H NIST	Organic acids and derivatives	Carboxylic acids and derivatives	Amino acids, peptides, and analogues	HMDB0000192, HMDB0250712	L-Cystine --- Cystine								LEVWYRKDKASIDU-IMJSIDKUSA-N, LEVWYRKDKASIDU-UHFFFAOYSA-N	C6H12N2O4S2	2	M+H	241.031	120.01	15.91	15.91	10	26.477	17.6471	93.8776	0.258965	0.0340799	0.0460705	0.0734684	0.641819	0.490332	0.391032	0.170619	0.278943	0.255016	0.0335029	0.0634206	0.107739	0.100928	0.114623
NAE 18:3	NAE	RP_PosMS1_36	RT_1	Y	nonGL	.alpha.-Linolenoyl ethanolamide M+H NIST --- Alpha-Linolenoyl ethanolamide M+H HMDB --- NAE 18:3 M+H Atlas	Organic nitrogen compounds	Organonitrogen compounds	Amines	HMDB0013624	Alpha-Linolenoyl ethanolamide	Fatty Acyls [FA]	Fatty amides [FA08]	N-acyl ethanolamides (endocannabinoids) [FA0804]	LMFA08040007	Anandamide (18:3, n-3)	NAE 18:3		HBJXRRXWHSHZPU-PDBXOOCHSA-N	C20H35NO2	1	M+H	322.272		2.72	2.72	62.3656	5.27624	100	100	-0.253239	0.0346535	0.0467399	-0.181193	0.240641	0.299964	-0.528124	0.0579851	0.14029	-0.0845558	0.477419	0.322937	-0.132291	0.0391634	0.0563954
4-Penten-1-ol	Xenobiotics	HILIC_PosMSMS_10			nonGL	4-Penten-1-ol M+H-H2O NIST													LQAVWYMTUMSFBE-UHFFFAOYSA-N	C5H10O	1	M+H-H2O	69.0695		10.64	10.64	87.2973	6.18915	100	100	-0.259291	0.0350585	0.0471794	-0.0926065	0.560087	0.460237	-0.322138	0.262946	0.356354	-0.203279	0.09384	0.123914	-0.107523	0.103908	0.1171
1-Methylguanosine --- 2-Methylguanosine	Purine nucleosides	HILIC_NegMSMS_568	RT_3		nonGL	1-Methylguanosine M-H HMDB --- N2-Methylguanosine M-H FiehnHILIC	Nucleosides, nucleotides, and analogues	Purine nucleosides		HMDB0001563, HMDB0005862	1-Methylguanosine --- 2-Methylguanosine								SLEHROROQDYRAW-UHFFFAOYNA-N, UTAIYTHAJQNQDW-KQYNXXCUSA-N	C11H15N5O5	1	M-H	296.1		9.84	9.83	47.9675	11.4691	82.2034	100	-0.260596	0.0355715	0.047762	-0.184865	0.247043	0.304211	-0.441275	0.126934	0.233463	-0.103371	0.400692	0.292475	-0.130417	0.0495327	0.0683551
LPE 18:0	LPE	RP_PosMSMS_335, 369		Y	nonGL	1-Stearoyl-2-hydroxy-sn-glycero-3-phosphoethanolamine M+H NIST --- LPE 18:0 M+H Atlas, 1-Stearoyl-2-hydroxy-sn-glycero-3-phosphoethanolamine M+Na NIST	Lipids and lipid-like molecules	Glycerophospholipids	Glycerophosphoethanolamines	HMDB0011130	LysoPE(18:0/0:0)	Glycerophospholipids [GP]	Glycerophosphoethanolamines [GP02]	Monoacylglycerophosphoethanolamines [GP0205]	LMGP02050001	PE(18:0/0:0)	LPE 18:0	LPE 18:0	BBYWOYAFBUOUFP-JOCHJYFZSA-N, BBYWOYAFBUOUFP-UHFFFAOYNA-N, BBYWOYAFBUOUFP-JOCHJYFZSA-N	C23H48NO7P	1	M+H, M+Na	482.3225, 504.3041		3.4	3.39	61.0215	3.06982	100	100	-0.257591	0.0360935	0.0483539	-0.1525	0.335923	0.365265	-0.109707	0.703607	0.56391	-0.0591319	0.628136	0.368036	-0.106237	0.107781	0.120553
3,4,5-Trimethoxycinnamic acid	Cinnamic acids and derivatives	HILIC_PosMS1_638			nonGL	3,4,5-Trimethoxycinnamic acid M+H HMDB --- 3,4,5-Trimethoxycinnamic acid M+H NIST --- 3,4,5-Trimethoxycinnamic acid; LC-ESI-QTOF; MS2; CE M+H MassBank --- 3,4,5-Trimethoxycinnamic_acid; LC-ESI-ITFT; MS2; CE 35 eV; [M+H]+ M+H MassBank --- 3,4,5-Trimethoxycinnamic_acid; LC-ESI-ITFT; MS2; CE 45 eV; [M+H]+ M+H MassBank --- 3,4,5-Trimethoxycinnamic_acid; LC-ESI-ITFT; MS2; CE 55 eV; [M+H]+ M+H MassBank…	Phenylpropanoids and polyketides	Cinnamic acids and derivatives	Hydroxycinnamic acids and derivatives	HMDB0002511	3,4,5-Trimethoxycinnamic acid								YTFVRYKNXDADBI-SNAWJCMRSA-N	C12H14O5	1	M+H	239.089		13.03	13.03	72.7027	8.66615	95.7983	100	-0.255393	0.0368029	0.0490837	-0.11328	0.47311	0.424259	-0.512093	0.0717992	0.160765	-0.246683	0.0400132	0.0717995	-0.120143	0.0670051	0.084378
PE 26:0	PE	RP_PosMS1_513		Y	nonGL	NAGly 16:4/20:4 M+H Atlas --- NAGly 18:5/18:3 M+H Atlas --- NAGly 20:5/16:3 M+H Atlas --- NAGlySer 16:4/12:0 M+NH4 Atlas --- NAGlySer 18:4/10:0 M+NH4 Atlas --- PC 10:0_13:0 M+H Atlas --- PC 11:0_12:0 M+H Atlas --- PC 8:0_15:0 M+H Atlas --- PC 9:0_14:0 M+H Atlas --- PE 10:0_16:0 M+H Atlas --- PE 11:0_15:0 M+H Atlas --- PE 12:0_14:0 M+H Atlas --- PE 13:0_13:0 M+H Atlas --- PE 8:0_18:0 M+H Atlas ---…						Glycerophospholipids [GP]	Glycerophosphoethanolamines [GP02]	Diacylglycerophosphoethanolamines [GP0201]	LMGP02010058 --- LMGP02010243	PE(12:0/14:0) --- PE(13:0/13:0)	PE 26:0	PE 12:0_14:0 --- PE 13:0_13:0	AWEPKLWMPGQHNQ-UHFFFAOYNA-N, BINJSNVQMGOPEN-QBFSEMIENA-N, CJKCZRZXQYNVCM-UHFFFAOYNA-N, GLVKHGQULFMGAQ-UHFFFAOYNA-N, GPHVMVIRTFBYMU-NFXOOHQPNA-N, KDVDVTILXOIHEU-OWBHPGMINA-N, LLJRGNNRNQSMHQ-LUAWRHEFNA-N, NKLYIQAVLDTWAJ-UHFFFAOYNA-N, NZSPJQLJHNIGIC-WSFNHVCXNA-N, ORPFJMVEZDWOTR-UHFFFAOYNA-N, PCQXXHGOPKFWJS-UHFFFAOYNA-N, QLGWASFCJBTTMO-QSXJKKDDNA-N, QTRFMGRYALIPJP-KUXGPOOQNA-N, SFXBPFZYGBNJED-BENRWUE…	C31H62NO8P	1	M+H --- M+NH4	608.425		3.85	3.84	20.1613	15.8976	61.9835	100	-0.249433	0.0367946	0.0490837	-0.0864806	0.575146	0.466509	-0.210507	0.452021	0.46306	-0.137765	0.244094	0.218243	-0.0976897	0.128395	0.136199
L-Serine	Amino acids, peptides, and analogues	HILIC_NegMSMS_19			nonGL	L-Serine M-H HMDB --- L-Serine M-H NIST	Organic acids and derivatives	Carboxylic acids and derivatives	Amino acids, peptides, and analogues	HMDB0000187	L-Serine	Fatty Acyls [FA]	Fatty Acids and Conjugates [FA01]	Amino fatty acids [FA0110]	LMFA01100045	2-Amino-3-hydroxypropanoic acid			MTCFGRXMJLQNBG-REOHCLBHSA-N, MTCFGRXMJLQNBG-UHFFFAOYSA-N	C3H7NO3	1	M-H	104.035		14.72	14.74	95.122	6.63651	100	100	0.254479	0.0369092	0.0491156	0.302073	0.0527843	0.110166	0.196332	0.492138	0.48402	0.262634	0.0280313	0.0559312	0.13619	0.0367471	0.0536941
PE O-37:5	PE-O	RP_Pos, RP_NegMSMS_824, 381		Y	nonGL	PE O-17:1_20:4 M+H Atlas, PE O-17:1_20:4 M-H Atlas													ZTNZTGXTHOFZGC-LNFNTRPGNA-N	C42H76NO7P	1, 2	M+H, M-H	738.5394, 736.5289	303.229	6.465	6.42	42.0485	5.46349	99.1736	100	-0.253402	0.0379498	0.0503878	-0.357676	0.0214079	0.0592259	-0.309893	0.277819	0.365925	0.0529386	0.662449	0.377179	-0.151677	0.0197751	0.031828
SM 40:1;O2	SM	RP_Pos, RP_NegMSMS_1051, 976, 627		Y	nonGL	SM 40:1;2O M+Na Atlas, N-Docosanoyl-4-sphingenyl-1-O-phosphorylcholine M+H NIST --- SM 18:1;2O/22:0 M+H Atlas --- SM 37:1;2O/3:0 M+H Atlas, SM 18:1;2O/22:0 M+HCOO Atlas --- SM 37:1;2O/3:0 M+HCOO Atlas	Lipids and lipid-like molecules	Sphingolipids	Phosphosphingolipids	HMDB0012103	SM(d18:1/22:0)	Sphingolipids [SP]	Phosphosphingolipids [SP03]	Ceramide phosphocholines (sphingomyelins) [SP0301]	LMSP03010006	SM(d18:1/22:0)	SM 40:1;O2	SM 18:1;O2/22:0	YHGKRGXWJFBPDN-ZCXUNETKNA-N, FJJANLYCZUNFSE-BSKJHSHCNA-N, FJJANLYCZUNFSE-TWKUQIQBSA-N, KXVRRGVVMDPLBD-YMZYAJTMNA-N, FJJANLYCZUNFSE-BSKJHSHCNA-N, KXVRRGVVMDPLBD-YMZYAJTMNA-N	C45H91N2O6P	1	M+Na, M+H, M+HCOO	809.6466, 787.6638, 831.6599		7.55	7.51	95.9677	3.23511	100	100	-0.256305	0.038187	0.0505902	-0.362785	0.0211955	0.0589028	-0.0546244	0.850655	0.610867	-0.279082	0.0211156	0.0466336	-0.139819	0.0343647	0.0508359
PS 36:5	PS	RP_NegMSMS_491		Y	nonGL	Hex2Cer 24:1;2O M+CH3COO Atlas --- Hex2Cer 25:1;2O M+HCOO Atlas --- PS 18:2_18:3 M-H Atlas	Lipids and lipid-like molecules	Glycerophospholipids	Glycerophosphoserines	HMDB0012403	PS(18:2(9Z,12Z)/18:3(9Z,12Z,15Z))	Glycerophospholipids [GP]	Glycerophosphoserines [GP03]	Diacylglycerophosphoserines [GP0301]	LMGP03010352	PS(18:2(9Z,12Z)/18:3(9Z,12Z,15Z))	PS 36:5	PS 18:2_18:3	BUZGPRVYXXZJOM-DYXXURTGNA-N, HEESZPIIMZQZEP-KHPPLWFENA-N, UBJLNBYGBQASKR-QXMHVHEDNA-N	C42H72NO10P	2	M+CH3COO --- M+HCOO --- M-H	780.48	277.217	5.52	5.52	19.1375	8.76959	59.1667	100	-0.251184	0.0386015	0.0510258	-0.214138	0.170169	0.242554	-0.460027	0.103806	0.205546	-0.050574	0.674983	0.379511	-0.133858	0.039283	0.0564312
N6,N6,N6-Trimethyl-L-lysine	Amino acids, peptides, and analogues	HILIC_PosMSMS_456			nonGL	N6,N6,N6-Trimethyl-L-lysine M+H HMDB	Organic acids and derivatives	Carboxylic acids and derivatives	Amino acids, peptides, and analogues	HMDB0001325	N6,N6,N6-Trimethyl-L-lysine								MXNRLFUSFKVQSK-QMMMGPOBSA-N	C9H20N2O2	1	M+H	189.16		15.77	15.77	65.6757	14.5522	91.5966	100	0.250226	0.0391144	0.0515895	0.206214	0.186148	0.257646	0.102545	0.7185	0.568487	0.202252	0.0906595	0.121377	0.113171	0.0820714	0.0982483
Cytosine	Pyrimidines and pyrimidine derivatives	HILIC_PosMSMS_86	RT_1		nonGL	Cytosine M+H FiehnHILIC --- Cytosine M+H HMDB	Organoheterocyclic compounds	Diazines	Pyrimidines and pyrimidine derivatives	HMDB0000630	Cytosine								OPTASPLRGRRNAP-UHFFFAOYSA-N	C4H5N3O	1	M+H	112.05		10.04	10.03	99.4595	9.63837	99.1597	100	-0.251532	0.0394999	0.0518684	-0.0243013	0.877662	0.565282	-0.595247	0.0354564	0.0998576	-0.0270224	0.823802	0.427439	-0.107858	0.100194	0.114428
PC 34:2;O	OxPC	RP_NegMSMS_600		Y	nonGL	PC 16:0_18:2;O M+HCOO Atlas	Lipids and lipid-like molecules	Glycerophospholipids	Glycerophosphocholines	HMDB0285953	PC(16:0/18:1(9Z)-O(12,13))								HZKBHRZARZUXPO-VYIQYICTNA-N	C42H80NO9P	2	M+HCOO	818.554	295.227	4.32	4.33	6.73854	10.3542	20.8333	100	-0.254809	0.039491	0.0518684	-0.25275	0.111418	0.184014	-0.143051	0.621984	0.539683	-0.192027	0.115763	0.140172	-0.124798	0.059807	0.0776787
LPG 18:0	LPG	HILIC_NegMSMS_1095		Y	nonGL	LPG 18:0 M-H Atlas	Lipids and lipid-like molecules	Glycerophospholipids	Glycerophosphoglycerols	HMDB0061697	1-Stearoylglycerophosphoglycerol	Glycerophospholipids [GP]	Glycerophosphoglycerols [GP04]	Monoacylglycerophosphoglycerols [GP0405]	LMGP04050009	PG(18:0/0:0)	LPG 18:0	LPG 18:0	HFJVKBVEKQHVTO-UHFFFAOYNA-N	C24H49O9P	1	M-H	511.301		8.55	8.42	32.5203	7.37157	100	100	0.253553	0.0401872	0.0526549	0.188449	0.236075	0.296528	0.359798	0.212534	0.314649	0.0970734	0.428294	0.304107	0.124696	0.0596258	0.0776787
PC 39:1	PC	RP_PosMSMS_1186		Y	nonGL	NAGlySer 20:4/26:4 M+NH4 Atlas --- NAGlySer 22:4/24:4 M+NH4 Atlas --- NAGlySer 22:6/24:2 M+NH4 Atlas --- NAGlySer 24:3/22:5 M+NH4 Atlas --- NAGlySer 24:4/22:4 M+NH4 Atlas --- NAGlySer 24:5/22:3 M+NH4 Atlas --- NAGlySer 24:6/22:2 M+NH4 Atlas --- NAGlySer 26:4/20:4 M+NH4 Atlas --- NAGlySer 26:5/20:3 M+NH4 Atlas --- NAGlySer 26:6/20:2 M+NH4 Atlas --- NAGlySer 26:7/20:1 M+NH4 Atlas --- PC 39:1 M+Na A…						Glycerophospholipids [GP]	Glycerophosphocholines [GP01]	Diacylglycerophosphocholines [GP0101]	LMGP01011798	PC(20:0/19:1(9Z))	PC 39:1	PC 19:1_20:0	CSVACGZDXQJPEI-XRJABPFONA-N, HFCMVNBXWWWLGN-RYERZOPMNA-N, JKSYHFWDRRBXTO-VXPUYCOJNA-N, KLWBKAKYWOBISY-KMUNNBFLNA-N, LCAMMFLITOOIMD-WHAATSOANA-N, MUBDQVYTGVDPOD-SHUBSKTANA-N, NVTGRBPJTLNUHW-OWPJDSEUNA-N, NWNQZYBSNYYKMN-ITKZVYPDNA-N, NYLGKIZNCJWXJX-DDRXFMCRNA-N, QJFUNGVNSFSHEO-JLNRCLCRNA-N, RKRWSVNEUAUPNM-CKINDYDQNA-N, VAOQRIBDTYYYRR-CZJGBCDCNA-N, VDMGMSAWSWYSPV-NXVVXOECNA-N, VFDFGNSSBZZNDO-BZZOAKB…	C47H92NO8P	1	M+NH4 --- M+Na	852.64		7.54	7.51	67.4731	29.5211	98.3471	100	-0.25236	0.0410278	0.053521	-0.421513	0.00700964	0.0246002	-0.213071	0.461376	0.467856	-0.364482	0.0022879	0.0101056	-0.157423	0.016658	0.0274977
TAG 61:9	TAG	RP_PosMS1_1516		Y	GL	TG 10:0_13:0_38:9 M+NH4 Atlas --- TG 10:0_13:1_38:8 M+NH4 Atlas --- TG 10:0_15:0_36:9 M+NH4 Atlas --- TG 10:0_15:1_36:8 M+NH4 Atlas --- TG 10:0_17:0_34:9 M+NH4 Atlas --- TG 10:0_17:1_34:8 M+NH4 Atlas --- TG 10:0_17:2_34:7 M+NH4 Atlas --- TG 10:0_19:0_32:9 M+NH4 Atlas --- TG 10:0_19:1_32:8 M+NH4 Atlas --- TG 10:0_19:2_32:7 M+NH4 Atlas --- TG 10:0_21:1_30:8 M+NH4 Atlas --- TG 10:0_21:2_30:7 M+NH4 A…						Glycerolipids [GL]	Triradylglycerols [GL03]	Triacylglycerols [GL0301]	LMGL03012018 --- LMGL03012029 --- LMGL03012090 --- LMGL03012133 --- LMGL03012145 --- LMGL03012201 --- LMGL03016651 --- LMGL03016737 --- LMGL03016761	TG(17:0/22:3(10Z,13Z,16Z)/22:6(4Z,7Z,10Z,13Z,16Z,19Z))[iso6] --- TG(17:1(9Z)/22:2(13Z,16Z)/22:6(4Z,7Z,10Z,13Z,16Z,19Z))[iso6] --- TG(17:1(9Z)/22:3(10Z,13Z,16Z)/22:5(7Z,10Z,13Z,16Z,19Z))[iso6] --- TG(17:2(9Z,12Z)/22:1(13Z)/22:6(4Z,7Z,10Z,13Z,16Z,19Z))[iso6] --- TG(17:2(9Z,12Z)/22:2(13Z,16Z)/22:5(7Z,10Z,13Z,16Z,19Z))[iso6] --- TG(18:3(9Z,12Z,15Z)/21:0/22:6(4Z,7Z,10Z,13Z,16Z,19Z))[iso6] --- TG(18:4(…	TG 61:9	TG 17:0_22:3_22:6 --- TG 17:1_22:2_22:6 --- TG 17:1_22:3_22:5 --- TG 17:2_22:1_22:6 --- TG 17:2_22:2_22:5 --- TG 18:3_21:0_22:6 --- TG 18:4_21:0_22:5 --- TG 19:1_20:2_22:6 --- TG 19:1_20:5_22:3	AGSKZINPJMAKAS-FYXDUGRVNA-N, ALYXLDVDMUPJEH-JMPUTPBVNA-N, AOBXOWRGRJMQCI-GWECHVTQNA-N, AQAQVEBFOBNRGO-WIKVDMHHNA-N, AQEYVMJVPDMMJE-NIYMVRGGNA-N, AQQGEBJVZUZMGC-MFPNKTHENA-N, ASZOPKMLYVKBJI-MYPRJFBGNA-N, AUDCMVADWBFISP-IRPXPMHYNA-N, AUEJFEHUCZDIAZ-ZXZFUZJPNA-N, AUPVSWOABGSTIN-VIVBPVQWNA-N, AXKLQUBZURXAIT-NWVCPNKRNA-N, AXRFGFKJFGQNAX-YIKBCVFJNA-N, BIWGGTNGHUPWSO-ACKBTQBGNA-N, BIZRRUIDNGLURQ-IQDBCUB…	C64H106O6	1	M+NH4	988.832		11.66	11.6	60.2151	26.7822	90.9091	100	0.240174	0.0410174	0.053521	0.0949704	0.531296	0.44887	-0.0822373	0.76544	0.58461	0.124505	0.284708	0.242177	0.0809529	0.200987	0.192328
ST 22:4;O4	ST - Steroids	RP_PosMSMS_82		Y	nonGL	15-Ketoiloprost M+H-H2O NIST --- Canrenoic acid M+H-H2O NIST --- Canrenone M+H HMDB --- Spirolactone SC 14266 M+H HMDB	Lipids and lipid-like molecules	Steroids and steroid derivatives	Steroid lactones	HMDB0003033, HMDB0258427	Canrenone --- Spirolactone SC 14266	Sterols [ST]	Steroids [ST02]	C21 steroids (gluco/mineralocorticoids, progestogins) and derivatives [ST0203]	LMST02030154	canrenoic acid	ST 22:4;O4		LDICATDQJSBQOX-QRWAJORESA-N, PBKZPPIHUVSDNM-WNHSNXHDSA-N, UJVLDDZCTMKXJK-UHFFFAOYSA-N, UJVLDDZCTMKXJK-WNHSNXHDSA-N	C22H28O3, C22H30O4	1	M+H --- M+H-H2O	341.208		3.04	3.04	100	21.4674	100	100	-0.245148	0.0411342	0.0535428	-0.0565191	0.715462	0.51607	-0.16182	0.56514	0.518395	-0.142813	0.229139	0.210852	-0.0886187	0.170181	0.170473
LPC 16:0	LPC	RP_Pos, RP_NegMSMS_360, 387, 164		Y	nonGL	Lyso-PC(16:0) M+H NIST --- PC O-16:0 M+H Atlas, LPC 16:0 M+Na Atlas, LPC 16:0 M+HCOO Atlas	Lipids and lipid-like molecules	Glycerophospholipids	Glycerophosphocholines	HMDB0010382, HMDB0010382, HMDB0256091	LysoPC(16:0/0:0) --- 1-Palmitoylphosphatidylcholine	Glycerophospholipids [GP]	Glycerophosphocholines [GP01]	Monoacylglycerophosphocholines [GP0105]	LMGP01050018, LMGP01050018 --- LMGP01050113	PC(16:0/0:0), PC(16:0/0:0) --- PC(16:0/0:0)[rac]	LPC 16:0	LPC 16:0	ASWBNKHCZGQVJV-HSZRJFAPSA-N, GDMHMXIBVHRZGP-UHFFFAOYNA-N, ASWBNKHCZGQVJV-UHFFFAOYNA-N	C24H50NO7P	1, 2	M+H, M+Na, M+HCOO	496.338, 518.3197, 540.3314	480.304	2.87	2.85	80.6452	7.10506	100	100	-0.255391	0.0413725	0.0537355	-0.19994	0.214461	0.282343	-0.090637	0.757548	0.582586	-0.101766	0.412327	0.296658	-0.112914	0.0929316	0.108293
Ectoine	Amino acids, peptides, and analogues	HILIC_Pos, HILIC_NegMSMS, MS1_218, 96			nonGL	Ectoine M+H HMDB, Ectoine M-H HMDB	Organic acids and derivatives	Carboxylic acids and derivatives	Amino acids, peptides, and analogues	HMDB0240650	Ectoine								WQXNXVUDBPYKBA-YFKPBYRVSA-N	C6H10N2O2	1	M+H, M-H	143.0809, 141.0671		12.4	12.36	48.5095	7.43031	100	100	0.249988	0.0415526	0.0538522	0.0679541	0.667927	0.498793	0.149726	0.602513	0.531841	0.174306	0.150147	0.163356	0.0913647	0.16633	0.167499
His-Pro --- Pro-His	Amino acids, peptides, and analogues	HILIC_PosMS1_708	RT_2		nonGL	His-Pro M+H NIST --- N-2-Hydroxyethylpiperazine-N-3-propanesulfonic acid M+H NIST --- Pro-His M+H NIST	Organic acids and derivatives	Carboxylic acids and derivatives	Amino acids, peptides, and analogues	HMDB0029019, HMDB0304781	Prolyl-Histidine --- Histidinyl-Proline								BEPSGCXDIVACBU-UHFFFAOYSA-N, LNCFUHAPNTYMJB-UHFFFAOYSA-N, OWXMKDGYPWMGEB-UHFFFAOYSA-N	C11H16N4O3, C9H20N2O4S	1	M+H	253.129		2.99	2.98	55.1351	6.12283	79.8319	100	0.248025	0.0418704	0.0541463	0.147118	0.348995	0.369016	0.330203	0.246284	0.344792	0.152497	0.205759	0.1995	0.114291	0.0804408	0.0965643
LPS 20:4	LPS	HILIC_NegMSMS_1146		Y	nonGL	LPS 20:4 M-H Atlas													XKQPGKKDUSIGIL-LTKCOYKYNA-N	C26H44NO9P	1	M-H	544.27		10.58	10.5	54.4715	6.09631	100	100	-0.232013	0.0423765	0.0546822	-0.276815	0.0582474	0.118606	-0.360181	0.176836	0.283956	-0.152388	0.177251	0.18103	-0.134055	0.0279694	0.0426451
LPG 14:0	LPG	HILIC_NegMSMS_996		Y	nonGL	LPG 14:0 M-H Atlas						Glycerophospholipids [GP]	Glycerophosphoglycerols [GP04]	Monoacylglycerophosphoglycerols [GP0405]	LMGP04050012	PG(14:0/0:0)	LPG 14:0	LPG 14:0	LUTDZDAPSDZVAL-UHFFFAOYNA-N	C20H41O9P	1	M-H	455.241		8.72	8.65	15.7182	16.493	27.9661	100	0.246863	0.0433797	0.0558559	0.176388	0.262129	0.313338	0.275165	0.335706	0.403851	0.122537	0.311251	0.252929	0.116164	0.0762422	0.0933317
Squalene	Other lipids	RP_PosMS1_235		Y	nonGL	Squalene M+H HMDB	Lipids and lipid-like molecules	Prenol lipids	Triterpenoids	HMDB0000256	Squalene	Prenol Lipids [PR]	Isoprenoids [PR01]	C30 isoprenoids (triterpenes) [PR0106]	LMPR0106010002	Squalene			YYGNTYWPHWGJRM-AAJYLUCBSA-N	C30H50	1	M+H	411.397		8.17	8.12	22.8495	18.5343	70.2479	100	0.242224	0.0434814	0.0558661	0.171776	0.265974	0.314786	0.245423	0.381977	0.428142	-0.0343828	0.772845	0.410901	0.112446	0.0805027	0.0965643
LPI 16:1	LPI	HILIC_NegMSMS_1178		Y	nonGL	LPI 16:1 M-H Atlas						Glycerophospholipids [GP]	Glycerophosphoinositols [GP06]	Monoacylglycerophosphoinositols [GP0605]	LMGP06050009	PI(16:1(9Z)/0:0)	LPI 16:1	LPI 16:1	VPFGUPHJCAHVJV-FPLPWBNLNA-N	C25H47O12P	1	M-H	569.273		10.85	10.94	62.3306	8.69131	56.7797	100	0.246826	0.0448311	0.0574763	0.231762	0.142229	0.214874	0.262075	0.362478	0.421034	0.157111	0.196283	0.192479	0.125169	0.057379	0.0758472
2'-O-Methylinosine	Purine nucleosides	HILIC_Pos, HILIC_NegMSMS_866, 520			nonGL	2'-O-Methylinosine M+H FiehnHILIC, 2'-O-Methylinosine M-H FiehnHILIC	Nucleosides, nucleotides, and analogues	Purine nucleosides		HMDB0341419									HPHXOIULGYVAKW-UHFFFAOYNA-N	C11H14N4O5	1	M+H, M-H	283.1039, 281.0889		6.505	6.52	81.8428	6.4334	99.1525	100	-0.244528	0.044984	0.0575486	-0.00506314	0.97436	0.583345	-0.342099	0.229691	0.331872	-0.0698988	0.563469	0.347347	-0.0890104	0.174997	0.173299
2'-O-Methyluridine	Pyrimidine nucleosides	HILIC_NegMSMS_453			nonGL	2'-O-Methyluridine M-H HMDB	Nucleosides, nucleotides, and analogues	Pyrimidine nucleosides		HMDB0240328	2'-O-Methyluridine								SXUXMRMBWZCMEN-ZOQUXTDFSA-N	C10H14N2O6	1	M-H	257.078		3.33	3.37	85.9079	6.57457	99.1525	100	-0.244482	0.0461699	0.0588133	-0.0458984	0.771869	0.534781	-0.384956	0.178278	0.285003	-0.0898108	0.459977	0.316946	-0.0984396	0.135193	0.141895
PC O-38:7	PC-O	RP_NegMSMS_639		Y	nonGL	PC O-16:1_22:6 M+HCOO Atlas													LSUUYCOJTDXYNX-AQISBKEKNA-N	C46H80NO7P	2	M+HCOO	834.565	774.55	6.06	6	15.3639	22.6011	23.3333	100	-0.239559	0.0461612	0.0588133	-0.267588	0.0819234	0.151309	-0.375431	0.180332	0.2872	-0.161428	0.173674	0.178789	-0.135406	0.0348116	0.0513695
L-Leucine	Amino acids, peptides, and analogues	HILIC_PosMSMS_169	RT_1		nonGL	L-Isoleucine M+H NIST --- L-Leucine M+H HMDB --- L-Leucine M+H NIST --- Leucine M+H FiehnHILIC	Organic acids and derivatives	Carboxylic acids and derivatives	Amino acids, peptides, and analogues	HMDB0000687	L-Leucine	Fatty Acyls [FA]	Fatty Acids and Conjugates [FA01]	Amino fatty acids [FA0110]	LMFA01100048	2-Amino-4-methylpentanoic acid			AGPKZVBTJJNPAG-UHFFFAOYSA-N, ROHFNLRQFUQHCH-UHFFFAOYNA-N, ROHFNLRQFUQHCH-UHFFFAOYSA-N, ROHFNLRQFUQHCH-YFKPBYRVSA-N	C6H13NO2	2	M+H	132.101	44.049	10.47	10.49	100	10.0898	100	100	-0.24816	0.0463105	0.0588667	-0.0186598	0.907631	0.572083	-0.23522	0.4196	0.446862	-0.138254	0.2618	0.228539	-0.0867461	0.195636	0.187651
LPC 17:0	LPC	RP_Pos, RP_NegMSMS_381, 406, 173		Y	nonGL	1-Heptadecanoyl-sn-glycero-3-phosphocholine M+H NIST --- LPC 17:0-SN1 M+H Atlas --- PC O-17:0 M+H Atlas, 1-Heptadecanoyl-sn-glycero-3-phosphocholine M+Na NIST --- LPC 17:0 M+Na Atlas, LPC 17:0 M+HCOO Atlas	Lipids and lipid-like molecules	Glycerophospholipids	Glycerophosphocholines	HMDB0012108	LysoPC(17:0/0:0)	Glycerophospholipids [GP]	Glycerophosphocholines [GP01]	Monoacylglycerophosphocholines [GP0105]	LMGP01050024	PC(17:0/0:0)	LPC 17:0	LPC 17:0	SRRQPVVYXBTRQK-UHFFFAOYNA-N, SRRQPVVYXBTRQK-XMMPIXPASA-N, UHSLTHBXDXKKEO-UHFFFAOYNA-N, SRRQPVVYXBTRQK-UHFFFAOYNA-N, SRRQPVVYXBTRQK-XMMPIXPASA-N, SRRQPVVYXBTRQK-UHFFFAOYNA-N	C25H52NO7P	1, 2	M+H, M+Na, M+HCOO	510.3535, 532.3352, 554.3463	269.247	3.1	3.1	67.7419	5.16569	100	100	-0.24701	0.0468858	0.0594711	-0.263318	0.0982297	0.170839	-0.124544	0.668893	0.553688	-0.149093	0.224984	0.209379	-0.123437	0.0636579	0.0809175
Methyl-beta-galactopyranoside	Carbohydrates and carbohydrate conjugates	HILIC_NegMS1_268			nonGL	Methyl-beta-galactopyranoside M-H FiehnHILIC	Organic oxygen compounds	Organooxygen compounds	Carbohydrates and carbohydrate conjugates	HMDB0029965, HMDB0246173	Methyl beta-D-glucopyranoside --- Methyl alpha-D-galactopyranoside								HOVAGTYPODGVJG-UHFFFAOYNA-N	C7H14O6	1	M-H	193.073		12.84	12.82	63.9566	11.9091	100	100	-0.247393	0.0473831	0.0599744	-0.242419	0.129857	0.204617	0.015682	0.957238	0.643801	-0.107057	0.386364	0.285276	-0.112419	0.0930053	0.108293
PC O-32:1	PC-O	RP_Pos, RP_NegMSMS_769, 443		Y	nonGL	PC O-32:1 M+H Atlas, PC O-16:0_16:1 M+HCOO Atlas --- PC O-16:1_16:0 M+HCOO Atlas	Lipids and lipid-like molecules	Glycerophospholipids	Glycerophosphocholines	HMDB0013404	PC(O-16:0/16:1(9Z))	Glycerophospholipids [GP]	Glycerophosphocholines [GP01]	1-alkyl,2-acylglycerophosphocholines [GP0102]	LMGP01020182	PC(O-16:0/16:1(9Z))	PC O-32:1	PC O-16:0/16:1	LQQMWURSSDKNHJ-VXPUYCOJNA-N, BXQUYBIIGCTQFV-VLGSPTGONA-N, HJVQHTGUAIETCQ-ZPHPHTNENA-N	C40H80NO7P	2	M+H, M+HCOO	718.5707, 762.564	184.0725, 702.5383	6.65	6.645	68.5484	8.5125	100	100	-0.242606	0.0474857	0.0599769	-0.187181	0.234407	0.296044	-0.295127	0.30222	0.380522	0.0616301	0.611761	0.363723	-0.117902	0.0722208	0.0891411
Isopentenyl adenosine	Purine nucleosides	RP_PosMS1_70			nonGL	Isopentenyl-Adenosine; LC-ESI-ITFT; MS2; CE 13.0 eV; [M+H]+ M+H MassBank --- Isopentenyladenosine; LC-ESI-QQ; MS2; CE M+H MassBank --- Isopentenyladenosine; LC-ESI-QTOF; MS2; CE M+H MassBank --- N6-Isopentenyladenosine M+H FiehnHILIC --- Tubastatin A M+H NIST --- isopentenyl-Adenosine-[d6]; LC-ESI-ITFT; MS2; CE 22.0 eV; [M+H]+ M+H MassBank	Nucleosides, nucleotides, and analogues	Purine nucleosides		HMDB0304396	isopentenyl adenosine								GOVYBPLHWIEHEJ-UHFFFAOYSA-N, USVMJSALORZVDV-SDBHATRESA-N, USVMJSALORZVDV-UHFFFAOYNA-N	C15H21N5O4, C20H21N3O2	1	M+H	336.17		0.5	0.5	27.6882	29.1498	72.7273	100	0.242337	0.0477434	0.0601748	-0.0697588	0.65878	0.49478	0.450093	0.114154	0.216413	0.0176297	0.88464	0.439164	0.0810081	0.21903	0.202445
2-Hydroxycinnamic acid --- 4-Hydroxycinnamic acid	Cinnamic acids and derivatives	HILIC_PosMSMS_239	RT_2		nonGL	Chromone M+H NIST --- Coumarin M+H NIST --- p-Coumaric acid M+H-H2O NIST --- trans-2-Hydroxycinnamic acid M+H-H2O NIST --- trans-3-Hydroxycinnamic acid M+H-H2O NIST	Phenylpropanoids and polyketides	Cinnamic acids and derivatives	Hydroxycinnamic acids and derivatives	HMDB0002035, HMDB0002641	4-Hydroxycinnamic acid --- 2-Hydroxycinnamic acid								KKSDGJDHHZEWEP-SNAWJCMRSA-N, NGSWKAQJJWESNS-ZZXKWVIFSA-N, OTAFHZMPRISVEM-UHFFFAOYSA-N, PMOWTIHVNWZYFI-AATRIKPKSA-N, ZYGHJZDHTFUPRJ-UHFFFAOYSA-N	C9H6O2, C9H8O3	1	M+H --- M+H-H2O	147.044		12.56	12.57	97.5676	5.07662	100	100	-0.240191	0.048339	0.0607265	-0.0458569	0.770264	0.534433	-0.515169	0.0681649	0.156416	-0.136449	0.256741	0.226031	-0.104135	0.110789	0.123454
4-Aminohippuric acid	Benzenoids	HILIC_NegMS1_267	RT_3		nonGL	2-[(4-Aminobenzoyl)amino]acetic acid M-H NIST --- 9-Phenanthrenol M-H FiehnHILIC	Benzenoids	Benzene and substituted derivatives	Benzoic acids and derivatives	HMDB0001867	4-Aminohippuric acid								DZKIUEHLEXLYKM-UHFFFAOYSA-N, HSMNQINEKMPTIC-UHFFFAOYSA-N	C14H10O, C9H10N2O3	1	M-H	193.065		15.02	15.01	76.6938	10.1594	100	100	0.247271	0.0483848	0.0607265	0.131203	0.416339	0.401816	0.205697	0.482947	0.478952	0.0784046	0.527852	0.338474	0.104659	0.119721	0.129299
FA 20:3;O4 --- FA 20:4;O3	FA - Eicosanoids	RP_NegMS1_34	RT_2	Y	nonGL	11,15-Dioxo-9S-hydroxy-5Z-prostenoic acid M-H NIST --- 15(R),19(R)-Hydroxyprostaglandin E1 M-H-H2O NIST --- 15(R),19(R)-Hydroxyprostaglandin F2.alpha. M-H-H2O NIST --- 19(R)-Hydroxyprostaglandin F2.alpha. M-H-H2O NIST --- 5(S),14(R)-Lipoxin B4 M-H NIST --- 5(S),6(R),15(R)-Lipoxin A4 M-H NIST --- 5S,12R,20-Trihydroxy-6Z,8E,10E,14Z-eicosatetraenoic acid M-H NIST --- 6,15-Diketo-13,14-dihydro Prosta…	Lipids and lipid-like molecules	Fatty Acyls	Eicosanoids	HMDB0001220, HMDB0001403, HMDB0001509, HMDB0002122, HMDB0004240, HMDB0005077, HMDB0060042	Prostaglandin E2 --- Prostaglandin D2 --- 20-Hydroxy-leukotriene B4 --- Prostaglandin F3a --- 15-Keto-prostaglandin F2a --- 8-iso-15-keto-PGF2a --- 13,14-Dihydro-15-keto-PGD2	Fatty Acyls [FA]	Eicosanoids [FA03]	Isoprostanes [FA0311] --- Leukotrienes [FA0302] --- Lipoxins [FA0304] --- Prostaglandins [FA0301]	LMFA03010003 --- LMFA03010004 --- LMFA03010013 --- LMFA03010022 --- LMFA03010026 --- LMFA03010042 --- LMFA03010138 --- LMFA03010170 --- LMFA03020018 --- LMFA03040003 --- LMFA03110005	13,14-dihydro-15-keto-PGD2 --- 13,14-dihydro-6,15-diketo-PGF1alpha --- 15-keto-PGF2alpha --- 19R-hydroxy-PGF2alpha --- 20-hydroxy LTB4 --- 8-iso-15-keto-PGF2alpha --- PGD2 --- PGE2 --- PGF3alpha --- PGK1 --- epi-Lipoxin A4	FA 20:3;O4 --- FA 20:4;O3		BHMBVRSPMRCCGG-OUTUXVNYSA-N, IXAQOQZEOGMIQS-UZDWIPAXSA-N, IXAQOQZEOGMIQS-XKBKCPIJSA-N, KBHLXKOKUVJZIS-MKXGPGLRSA-N, KJWZYMMLVHIVSU-IYCNHOCDSA-N, LOLJEILMPWPILA-AMFHKTBMSA-N, LOLJEILMPWPILA-RLXHZABYSA-N, PTJFJXLGRSTECQ-PSPARDEHSA-N, PTJFJXLGRSTECQ-QNCDDMJDSA-N, QVVXWHIDRKRPMO-OXSULFDNSA-N, SAKGBZWJAIABSY-SAMSIYEGSA-N, UBWZMPMLSDJDSU-OQRQNLQMSA-N, UBWZMPMLSDJDSU-ZYPCAQTJSA-N, UXVRTOKOJOMENI-XKBCQJQ…	C20H32O5, C20H34O6	1	M-H --- M-H-H2O	351.221		3.63	3.62	96.496	28.7532	91.6667	100	-0.247584	0.0486303	0.0609064	-0.115927	0.47388	0.424259	-0.111391	0.704941	0.563971	-0.161767	0.192129	0.19021	-0.0970509	0.150426	0.153822
SM 33:1;O2	SM	RP_Pos, RP_NegMSMS_678, 377, 735		Y	nonGL	SM 31:1;2O/2:0 M+H Atlas, SM 31:1;2O/2:0 M+HCOO Atlas, SM 33:1;2O M+Na Atlas													SSGGLWRYLYNRJG-QNEJGDQONA-N, YDCVVJDUHPPJFR-OWWNRXNENA-N	C38H77N2O6P	1, 2	M+H, M+HCOO, M+Na	689.5558, 733.5504, 711.5378	673.527	5.21	5.2	67.7419	4.09586	100	100	-0.236142	0.0489668	0.0611992	-0.31807	0.0375584	0.0893504	-0.300813	0.28298	0.36961	0.0140118	0.906299	0.444789	-0.139312	0.029438	0.0447698
Indoleacetic acid	Indoles and derivatives	HILIC_PosMSMS_407			nonGL	3-Indoleacetic acid M+H NIST --- Indoleacetic acid M+H HMDB	Organoheterocyclic compounds	Indoles and derivatives	Indolyl carboxylic acids and derivatives	HMDB0000197	Indoleacetic acid								SEOVTRFCIGRIMH-UHFFFAOYSA-N	C10H9NO2	1	M+H	176.071		2.68	2.7	69.4595	15.9869	31.0924	100	-0.243471	0.0496585	0.0619339	-0.175956	0.270153	0.317265	-0.0650818	0.82282	0.602888	0.00360777	0.97662	0.461189	-0.103939	0.118569	0.128417
Methionine sulfoxide	Amino acids, peptides, and analogues	HILIC_PosMS1_347	RT_2		nonGL	Methioninesulfoxide M+H FiehnHILIC	Organic acids and derivatives	Carboxylic acids and derivatives	Amino acids, peptides, and analogues	HMDB0002005	Methionine sulfoxide								QEFRNWWLZKMPFJ-UHFFFAOYNA-N	C5H11NO3S	1	M+H	166.058		12.55	12.55	34.5946	4.8764	100	100	-0.241348	0.0499065	0.0621133	-0.0510508	0.74792	0.528184	-0.482683	0.0916157	0.188725	-0.0376464	0.757887	0.406714	-0.103648	0.116748	0.127942
LPG 22:4	LPG	HILIC_NegMSMS_1165		Y	nonGL	LPG 22:4 M-H Atlas													KJSNLKUMZOSQGP-LTKCOYKYNA-N	C28H49O9P	1	M-H	559.305		8.33	8.35	31.1653	8.28382	96.6102	100	0.238383	0.0507315	0.0630085	0.143556	0.360885	0.376121	0.204309	0.47423	0.474221	0.080881	0.503604	0.329855	0.104211	0.111511	0.124027
N-Allm	Amino acids, peptides, and analogues	HILIC_NegMS1_864			nonGL	Calpain Inhibitor II M-H NIST	Organic acids and derivatives	Carboxylic acids and derivatives	Amino acids, peptides, and analogues	HMDB0255078	N-Allm								RJWLAIMXRBDUMH-CGZBRXJRSA-N	C19H35N3O4S	1	M-H	400.221		6.35	6.46	45.2575	22.8969	57.6271	100	-0.223456	0.0517304	0.0641155	-0.158642	0.283002	0.326683	-0.178486	0.506693	0.486443	-0.327935	0.00318823	0.0127723	-0.101214	0.100426	0.114474
LPG 19:1	LPG	HILIC_NegMSMS_1110		Y	nonGL	LPG 19:1 M-H Atlas						Glycerophospholipids [GP]	Glycerophosphoglycerols [GP04]	Monoacylglycerophosphoglycerols [GP0405]	LMGP04050022	PG(19:1(9Z)/0:0)	LPG 19:1	LPG 19:1	XEYMIBOUJRVPFY-KHPPLWFENA-N	C25H49O9P	1	M-H	523.306		8.38	8.38	25.2033	9.31301	78.8136	100	0.240736	0.0521232	0.0644684	0.137176	0.390192	0.388726	0.30923	0.285434	0.370799	0.0544589	0.657751	0.376431	0.109348	0.100023	0.114428
[truncated: 622 more rows]
