# Supplementary material for: Global molecular landscape of early MASLD progression in human obesity
Source: eLife. 2026 Mar 23;14:RP109534. doi: 10.7554/eLife.109534 (PMC13008360; doi:10.7554/eLife.109534)
Supplement: Supplementary file 5. [file elife-109534-supp5.xlsx]

## Sheet: stats_wPathway_LinearReg_070923
Gene stable ID	HGNC symbol	Gene description	NCBI gene (formerly Entrezgene) ID	Fibrosis_sig_pathway	Steatosis_sig_pathway	LiverEnriched	CellTypeEriched	coef_Histo_Steatosis	pval_Histo_Steatosis	qval_Histo_Steatosis	coef_Histo_Steatosis_NoAdj	pval_Histo_Steatosis_NoAdj	qval_Histo_Steatosis_NoAdj	coef_Histo_Fibrosis	pval_Histo_Fibrosis	qval_Histo_Fibrosis	coef_Histo_Fibrosis_NoAdj	pval_Histo_Fibrosis_NoAdj	qval_Histo_Fibrosis_NoAdj	coef_Histo_NAS	pval_Histo_NAS	qval_Histo_NAS	coef_Histo_NAS_NoAdj	pval_Histo_NAS_NoAdj	qval_Histo_NAS_NoAdj	coef_Histo_Inflammation	pval_Histo_Inflammation	qval_Histo_Inflammation	coef_Histo_Inflammation_NoAdj	pval_Histo_Inflammation_NoAdj	qval_Histo_Inflammation_NoAdj	coef_Histo_Ballooning	pval_Histo_Ballooning	qval_Histo_Ballooning	coef_Histo_Ballooning_NoAdj	pval_Histo_Ballooning_NoAdj	qval_Histo_Ballooning_NoAdj
ENSG00000165841	CYP2C19	cytochrome P450 family 2 subfamily C member 19 [Source:HGNC Symbol;Acc:HGNC:2621]	1557	small molecule metabolic process; oxidation-reduction process; xenobiotic metabolic process; drug metabolic process; omega-hydroxylase P450 pathway; exogenous drug catabolic process; epoxygenase P450 pathway; steroid metabolic process; arachidonic acid metabolic process	xenobiotic metabolic process; oxidation-reduction process	*	Hepatocytes	-0.433461	0.000119313	0.00787371	-0.507891	3.34229e-06	0.00110289	-0.525664	1.66152e-06	0.00957237	-0.580173	6.71298e-09	3.45703e-05	-0.248368	4.18484e-05	0.011363	-0.284737	2.04462e-06	0.00216296	0.531012	0.000734812	0.453152	0.516319	0.000642119	0.309156	0.94838	0.000909487	0.132253	0.921977	0.000876515	0.136646
ENSG00000214253	FIS1	fission, mitochondrial 1 [Source:HGNC Symbol;Acc:HGNC:21689]	51024					-0.355692	0.00260839	0.0316174	-0.389993	0.000499915	0.0130233	-0.522348	4.4584e-06	0.00961665	-0.519972	3.4991e-07	0.000360391	-0.216367	0.00065215	0.0274409	-0.23302	0.000142201	0.0128141	0.304212	0.0564859	0.770375	0.285953	0.0644849	0.682706	0.84167	0.00319974	0.173065	0.848379	0.00231009	0.169912
ENSG00000242220	TCP10L	t-complex 10 like [Source:HGNC Symbol;Acc:HGNC:11657]	140290		negative regulation of transcription from RNA polymerase II promoter			-0.360463	0.00192037	0.0270659	-0.408811	0.000250893	0.0096175	-0.510678	5.35707e-06	0.00961665	-0.526757	2.32235e-07	0.000360391	-0.193199	0.00213013	0.0431197	-0.216508	0.000440046	0.0205799	0.4455	0.00341187	0.579102	0.48497	0.00140564	0.401719	0.977642	0.000342343	0.121603	1.05416	0.000121965	0.108667
ENSG00000175115	PACS1	phosphofurin acidic cluster sorting protein 1 [Source:HGNC Symbol;Acc:HGNC:30032]	55690					0.160722	0.174491	0.26394	0.21669	0.0587586	0.147726	0.502369	7.29774e-06	0.00961665	0.508891	6.71298e-07	0.000384114	0.0830129	0.195092	0.316484	0.111719	0.0768753	0.21039	0.431446	0.00503346	0.599014	0.443543	0.00364903	0.457325	0.442183	0.119006	0.43787	0.493073	0.0816302	0.421773
ENSG00000160972	PPP1R16A	protein phosphatase 1 regulatory subunit 16A [Source:HGNC Symbol;Acc:HGNC:14941]	84988					-0.414518	0.000431843	0.0133223	-0.443103	6.45331e-05	0.00497836	-0.510313	9.01631e-06	0.00961665	-0.509202	6.59356e-07	0.000384114	-0.199051	0.00193751	0.041847	-0.217283	0.000418255	0.0205799	0.453138	0.00395993	0.595309	0.43261	0.00462482	0.457325	0.578057	0.0455238	0.344307	0.552431	0.0505685	0.374262
ENSG00000198728	LDB1	LIM domain binding 1 [Source:HGNC Symbol;Acc:HGNC:6532]	8861	positive regulation of cell adhesion				0.219023	0.0690311	0.165952	0.194879	0.0897814	0.182931	0.5001	1.33275e-05	0.00961665	0.413797	7.98685e-05	0.00250079	0.147011	0.0233685	0.124753	0.135619	0.0310475	0.137541	0.354499	0.0165425	0.665926	0.408456	0.00764354	0.509046	0.802937	0.00254363	0.1617	0.863384	0.00190941	0.157276
ENSG00000241935	HOGA1	4-hydroxy-2-oxoglutarate aldolase 1 [Source:HGNC Symbol;Acc:HGNC:25155]	112817			*	Cholangiocytes | Hepatocytes	-0.335541	0.00581978	0.0458897	-0.335996	0.00295288	0.0296985	-0.506764	1.62168e-05	0.00961665	-0.456868	1.08576e-05	0.00126952	-0.168209	0.0108627	0.0912882	-0.171412	0.00601374	0.0629422	0.393732	0.0128581	0.63842	0.374926	0.0146545	0.574659	0.605259	0.036141	0.317168	0.591504	0.036023	0.34214
ENSG00000230513	THAP7-AS1	THAP7 antisense RNA 1 [Source:HGNC Symbol;Acc:HGNC:41013]	439931					-0.30972	0.00928666	0.0577627	-0.352808	0.0017518	0.0231401	-0.491791	1.844e-05	0.00961665	-0.494681	1.50025e-06	0.000482872	-0.151073	0.0194676	0.116461	-0.17738	0.00441392	0.0550012	0.508342	0.00111778	0.483952	0.474274	0.00181388	0.42725	0.833946	0.00341636	0.176159	0.800557	0.00414153	0.208271
ENSG00000219607	PPP1R3G	protein phosphatase 1 regulatory subunit 3G [Source:HGNC Symbol;Acc:HGNC:14945]	648791					-0.492745	1.70443e-05	0.00371257	-0.524723	1.41022e-06	0.000656721	-0.485192	2.17858e-05	0.00961665	-0.500084	1.10951e-06	0.000462927	-0.256744	3.71613e-05	0.0107051	-0.274269	5.30183e-06	0.00326473	0.359849	0.0210123	0.684653	0.395251	0.00993971	0.562223	0.904714	0.00118557	0.135225	0.917968	0.000926145	0.136646
ENSG00000243646	IL10RB	interleukin 10 receptor subunit beta [Source:HGNC Symbol;Acc:HGNC:5965]	3588	signal transduction	inflammatory response			0.53228	2.80386e-06	0.00167951	0.538027	6.91926e-07	0.000479477	0.482739	2.47766e-05	0.00961665	0.472933	4.81372e-06	0.000826318	0.246334	8.27362e-05	0.0161504	0.253762	2.97104e-05	0.00771445	0.374271	0.0174745	0.665926	0.32176	0.037016	0.647868	0.989314	0.000421505	0.128576	0.926828	0.000819722	0.13504
ENSG00000006757	PNPLA4	patatin like phospholipase domain containing 4 [Source:HGNC Symbol;Acc:HGNC:24887]	8228					-0.159432	0.16969	0.259463	-0.254657	0.0257745	0.0954794	-0.466264	2.49135e-05	0.00961665	-0.510136	6.24587e-07	0.000384114	-0.11755	0.0601002	0.19136	-0.160044	0.0105302	0.0816162	0.311898	0.0433701	0.754722	0.34876	0.0234882	0.603071	0.397056	0.159175	0.478198	0.428472	0.131025	0.482808
ENSG00000198743	SLC5A3	solute carrier family 5 member 3 [Source:HGNC Symbol;Acc:HGNC:11038]	6526		transmembrane transport; transport			0.333637	0.00515847	0.0426197	0.328102	0.00373877	0.0334341	0.486033	2.61471e-05	0.00961665	0.443207	2.10341e-05	0.00148385	0.213589	0.000836262	0.0287315	0.211051	0.000625705	0.0242713	0.437594	0.00427772	0.599014	0.458548	0.00260994	0.457325	0.273169	0.335934	0.581261	0.293545	0.302485	0.593956
ENSG00000160746	ANO10	anoctamin 10 [Source:HGNC Symbol;Acc:HGNC:25519]	55129	chloride transport; chloride transmembrane transport; ion transmembrane transport	cation transport; transmembrane transport; chloride transmembrane transport; ion transmembrane transport			0.409113	0.000574758	0.0152691	0.413325	0.000211436	0.00896626	0.488248	2.77103e-05	0.00961665	0.457835	1.03499e-05	0.00123953	0.206831	0.00136021	0.0360433	0.211252	0.000617742	0.0241517	0.259573	0.101712	0.793115	0.270552	0.0805498	0.701798	1.3503	6.11422e-07	0.00562191	1.37458	2.33719e-07	0.00223314
ENSG00000172425	TTC36	tetratricopeptide repeat domain 36 [Source:HGNC Symbol;Acc:HGNC:33708]	143941			*	Hepatocytes	-0.322662	0.00682805	0.0496928	-0.347883	0.00204705	0.0252628	-0.483849	2.78216e-05	0.00961665	-0.470346	5.50208e-06	0.000885451	-0.180829	0.0050107	0.063717	-0.1926	0.00190926	0.0381846	0.501012	0.00137542	0.55139	0.499404	0.00098664	0.370583	1.09731	9.05356e-05	0.0910797	1.09087	6.66249e-05	0.108667
ENSG00000116574	RHOU	ras homolog family member U [Source:HGNC Symbol;Acc:HGNC:17794]	58480	actin cytoskeleton organization; regulation of cell shape; cytoskeleton organization; small GTPase mediated signal transduction; regulation of small GTPase mediated signal transduction; metabolic process				0.133722	0.276882	0.332204	0.167167	0.146431	0.236965	0.487247	3.15279e-05	0.00961665	0.462784	8.08403e-06	0.00109555	0.0728458	0.273595	0.365599	0.0916406	0.147874	0.280889	0.366606	0.018624	0.675133	0.378936	0.0135946	0.563079	0.593965	0.0363859	0.318327	0.631916	0.0248454	0.313053
ENSG00000272143	FGF14-AS2	FGF14 antisense RNA 2 [Source:HGNC Symbol;Acc:HGNC:44368]	283481					-0.345717	0.00331969	0.0348409	-0.37516	0.000838362	0.0164024	-0.475887	3.22094e-05	0.00961665	-0.485715	2.44862e-06	0.000554254	-0.177879	0.00534212	0.0659168	-0.198482	0.00135427	0.0340307	0.275661	0.0708354	0.770375	0.310068	0.0446355	0.675607	0.523026	0.0588516	0.364397	0.598083	0.0339581	0.336697
ENSG00000204209	DAXX	death domain associated protein [Source:HGNC Symbol;Acc:HGNC:2681]	1616		positive regulation of protein phosphorylation; apoptotic process			0.350375	0.00327492	0.03472	0.309583	0.00635893	0.044637	0.481147	3.2881e-05	0.00961665	0.401139	0.000136845	0.00306081	0.16231	0.0123906	0.0959708	0.150704	0.0162323	0.101134	0.324388	0.0411285	0.743933	0.298711	0.0532397	0.682706	0.494075	0.0878371	0.407655	0.467016	0.0993812	0.442057
ENSG00000114790	ARHGEF26	Rho guanine nucleotide exchange factor 26 [Source:HGNC Symbol;Acc:HGNC:24490]	26084					-0.214328	0.0686747	0.165674	-0.278512	0.0144809	0.0693964	-0.468057	3.32205e-05	0.00961665	-0.501417	1.02918e-06	0.000462927	-0.0783982	0.220785	0.332651	-0.113618	0.0719059	0.203879	0.314615	0.0500743	0.768799	0.294755	0.0565398	0.682706	0.58208	0.0458013	0.344307	0.566409	0.0448901	0.366118
ENSG00000013619	MAMLD1	mastermind like domain containing 1 [Source:HGNC Symbol;Acc:HGNC:2568]	10046					0.148871	0.212613	0.290766	0.215893	0.0597131	0.148845	0.471108	3.52252e-05	0.00961665	0.49509	1.46664e-06	0.000482872	0.0622529	0.336262	0.403435	0.0957572	0.130308	0.266187	0.280186	0.0798628	0.770751	0.271399	0.0795899	0.700197	0.589646	0.041735	0.333112	0.564754	0.0455334	0.36757
ENSG00000166224	SGPL1	sphingosine-1-phosphate lyase 1 [Source:HGNC Symbol;Acc:HGNC:10817]	8879	spermatogenesis	sphingolipid metabolic process; small molecule metabolic process			0.320018	0.00453379	0.0402902	0.404179	0.000298355	0.0103374	0.452381	3.61518e-05	0.00961665	0.531406	1.74503e-07	0.000360391	0.15458	0.0116718	0.093397	0.199312	0.00128907	0.033074	0.337644	0.0316248	0.71947	0.297844	0.0539496	0.682706	0.541751	0.0582952	0.363699	0.543999	0.0542716	0.380372
ENSG00000198053	SIRPA	signal regulatory protein alpha [Source:HGNC Symbol;Acc:HGNC:9662]	140885	blood coagulation; cell adhesion; leukocyte migration	blood coagulation			0.432346	0.000265835	0.0107956	0.408963	0.000249466	0.0096175	0.482355	3.67687e-05	0.00961665	0.435389	3.03424e-05	0.00178166	0.201686	0.00185609	0.041847	0.200022	0.00123553	0.032606	0.438196	0.00574007	0.605959	0.401519	0.00878362	0.533526	1.0854	0.000120959	0.0910797	1.04142	0.000149527	0.108667
ENSG00000155252	PI4K2A	phosphatidylinositol 4-kinase type 2 alpha [Source:HGNC Symbol;Acc:HGNC:30031]	55361	phosphatidylinositol biosynthetic process; phosphatidylinositol phosphorylation; phospholipid metabolic process				0.247819	0.0395743	0.123571	0.219434	0.055568	0.143626	0.476872	3.77835e-05	0.00961665	0.387353	0.000240318	0.00401812	0.132168	0.0425574	0.164727	0.117662	0.0621827	0.190754	0.379986	0.017157	0.665926	0.378523	0.0137007	0.563079	0.577388	0.0471901	0.344811	0.578891	0.0402762	0.352652
ENSG00000164898	FMC1	formation of mitochondrial complex V assembly factor 1 homolog [Source:HGNC Symbol;Acc:HGNC:26946]	154791					-0.394627	0.000731951	0.0173068	-0.438321	7.86273e-05	0.00555975	-0.471828	3.83918e-05	0.00961665	-0.490704	1.86746e-06	0.000554254	-0.196338	0.00200554	0.041847	-0.219227	0.000367835	0.0199855	0.374145	0.0157662	0.656355	0.398963	0.00924	0.538257	0.625115	0.0267133	0.292922	0.691158	0.0138571	0.279675
ENSG00000154556	SORBS2	sorbin and SH3 domain containing 2 [Source:HGNC Symbol;Acc:HGNC:24098]	8470					-0.313588	0.00857345	0.0558588	-0.365195	0.00117163	0.0195765	-0.472355	4.40321e-05	0.00988962	-0.480512	3.23441e-06	0.000640633	-0.138589	0.032942	0.148454	-0.166676	0.00762922	0.0706447	0.316619	0.0457041	0.760854	0.306419	0.0472642	0.680192	0.777238	0.00637686	0.217894	0.730016	0.00920312	0.253076
ENSG00000075420	FNDC3B	fibronectin type III domain containing 3B [Source:HGNC Symbol;Acc:HGNC:24670]	64778				Plasma cells	0.178469	0.145491	0.241404	0.201026	0.0799528	0.172473	0.478249	4.52056e-05	0.00988962	0.447515	1.7125e-05	0.00142241	0.0533117	0.423554	0.446114	0.0689385	0.277531	0.373072	0.129129	0.41393	0.858212	0.0782251	0.61608	0.881857	0.276968	0.334147	0.580717	0.221525	0.437064	0.654665
ENSG00000169410	PTPN9	protein tyrosine phosphatase non-receptor type 9 [Source:HGNC Symbol;Acc:HGNC:9661]	5780					0.095266	0.418517	0.409551	0.118716	0.30377	0.342055	0.455615	4.87976e-05	0.00988962	0.427353	4.38228e-05	0.0020896	0.0613081	0.335557	0.403025	0.0702367	0.268524	0.36716	0.481175	0.00201822	0.579102	0.458633	0.00260486	0.457325	0.873925	0.00201304	0.149271	0.826356	0.00303587	0.192625
ENSG00000065054	SLC9A3R2	SLC9A3 regulator 2 [Source:HGNC Symbol;Acc:HGNC:11076]	9351				Endothelial cells | Hepatic stellate cells	-0.377907	0.00121151	0.0215285	-0.409007	0.000249049	0.0096175	-0.462797	5.2433e-05	0.00988962	-0.477286	3.835e-06	0.000731458	-0.174894	0.00604571	0.0688796	-0.195072	0.00165492	0.0364837	-0.349638	0.020525	0.682754	-0.327104	0.0339146	0.641302	-0.678329	0.0131131	0.248768	-0.585136	0.0381206	0.346789
ENSG00000143376	SNX27	sorting nexin 27 [Source:HGNC Symbol;Acc:HGNC:20073]	81609	signal transduction; endosomal transport; response to drug; intracellular protein transport				0.256925	0.0242393	0.0954176	0.234591	0.0404018	0.120656	0.444502	5.36938e-05	0.00988962	0.384962	0.000264345	0.00412955	0.143124	0.0202312	0.117931	0.13186	0.0361521	0.149239	-0.22957	0.103523	0.796904	-0.339749	0.027436	0.615334	-0.526778	0.0387525	0.323933	-0.698779	0.0128097	0.271987
ENSG00000187630	DHRS4L2	dehydrogenase/reductase 4 like 2 [Source:HGNC Symbol;Acc:HGNC:19731]	317749	oxidation-reduction process				-0.31503	0.00932173	0.0577627	-0.322102	0.00445601	0.03676	-0.473683	5.56965e-05	0.00988962	-0.441138	2.31956e-05	0.00153769	-0.18479	0.00467478	0.0617312	-0.189726	0.00224905	0.0401379	0.449949	0.00388416	0.592142	0.447961	0.0033101	0.457325	0.514374	0.0731861	0.387188	0.502191	0.076053	0.415875
ENSG00000203896	LIME1	Lck interacting transmembrane adaptor 1 [Source:HGNC Symbol;Acc:HGNC:26016]	54923				Plasma cells | T-cells	-0.341977	0.00444763	0.039962	-0.355247	0.00162036	0.0222786	-0.471671	5.59125e-05	0.00988962	-0.450411	1.48921e-05	0.00137301	-0.18024	0.00564852	0.0672191	-0.188922	0.00235342	0.0409917	0.456231	0.0037879	0.591752	0.417992	0.00628977	0.491239	0.830822	0.00368329	0.176159	0.757555	0.00679706	0.243153
ENSG00000173848	NET1	neuroepithelial cell transforming 1 [Source:HGNC Symbol;Acc:HGNC:14592]	10276					-0.35865	0.00134098	0.0225737	-0.444896	5.98847e-05	0.00483528	-0.441338	5.62118e-05	0.00988962	-0.52362	2.80998e-07	0.000360391	-0.201127	0.000863535	0.028794	-0.242688	7.00001e-05	0.0100502	0.423568	0.00712343	0.605959	0.410983	0.00726184	0.507628	0.667994	0.0200657	0.27187	0.678852	0.0157055	0.287023
ENSG00000253764	KBTBD11-AS1	KBTBD11 antisense RNA 1 [Source:HGNC Symbol;Acc:HGNC:55530]	101928058					-0.213728	0.0785411	0.175985	-0.145934	0.205495	0.280329	-0.468432	5.94304e-05	0.00988962	-0.330138	0.00195172	0.0112805	-0.128861	0.0494598	0.175984	-0.0992356	0.116747	0.252907	-0.235306	0.138041	0.804454	-0.250692	0.105813	0.738429	-0.491198	0.0875394	0.407136	-0.498918	0.0780188	0.418235
ENSG00000043462	LCP2	lymphocyte cytosolic protein 2 [Source:HGNC Symbol;Acc:HGNC:6529]	3937	blood coagulation; platelet activation; intracellular signal transduction; T cell receptor signaling pathway; transmembrane receptor protein tyrosine kinase signaling pathway; innate immune response			Kupffer cells | NK-cells | Macrophages | T-cells | granulocytes	0.0937726	0.423636	0.411527	0.194947	0.0896673	0.182753	0.447487	6.25699e-05	0.00988962	0.512326	5.49809e-07	0.000384114	0.0628502	0.321132	0.393912	0.110121	0.0812663	0.216396	-0.452409	0.00305682	0.579102	-0.490056	0.00124244	0.396646	-0.641108	0.0221001	0.277125	-0.681187	0.0153392	0.287023
ENSG00000001629	ANKIB1	ankyrin repeat and IBR domain containing 1 [Source:HGNC Symbol;Acc:HGNC:22215]	54467	protein ubiquitination involved in ubiquitin-dependent protein catabolic process				0.0805053	0.510481	0.449509	0.136396	0.236953	0.302114	0.466724	6.2804e-05	0.00988962	0.465933	6.89448e-06	0.00104426	0.0514605	0.436652	0.451174	0.0781129	0.218126	0.33452	0.303019	0.045035	0.756922	0.340915	0.0268951	0.614765	0.488489	0.0758871	0.389597	0.583171	0.0387882	0.347639
ENSG00000157191	NECAP2	NECAP endocytosis associated 2 [Source:HGNC Symbol;Acc:HGNC:25528]	55707	endocytosis; protein transport			monocytes	0.284824	0.0172093	0.0797041	0.342978	0.00238504	0.0271586	0.462824	6.32741e-05	0.00988962	0.485243	2.51168e-06	0.000554254	0.133149	0.0403986	0.160434	0.164472	0.00850356	0.074594	0.2711	0.0785255	0.770375	0.258959	0.0946342	0.719375	0.741385	0.00735122	0.222568	0.729302	0.00927434	0.253076
ENSG00000250436	LINC02499	long intergenic non-protein coding RNA 2499 [Source:HGNC Symbol;Acc:HGNC:53484]	728040			*		-0.220729	0.0705133	0.168019	-0.240494	0.0355138	0.112478	-0.468938	6.39801e-05	0.00988962	-0.432534	3.46104e-05	0.00186863	-0.115828	0.0795858	0.217254	-0.124419	0.0483433	0.169533	-0.382762	0.011446	0.63842	-0.415849	0.00657401	0.491239	-0.339663	0.222945	0.520421	-0.394244	0.165106	0.512028
ENSG00000166592	RRAD	RRAD, Ras related glycolysis inhibitor and calcium channel regulator [Source:HGNC Symbol;Acc:HGNC:10446]	6236	small GTPase mediated signal transduction; negative regulation of cell growth			Smooth muscle cells	0.459283	0.000125697	0.00794075	0.433303	9.64546e-05	0.00630558	0.474956	6.46566e-05	0.00988962	0.408418	0.000100658	0.0026547	0.189229	0.00413567	0.0589268	0.184079	0.00307952	0.0451129	0.379026	0.0170921	0.665926	0.353	0.0218054	0.588213	0.916681	0.00128948	0.141376	0.907543	0.0010674	0.136646
ENSG00000204262	COL5A2	collagen type V alpha 2 chain [Source:HGNC Symbol;Acc:HGNC:2210]	1290	extracellular matrix organization; axon guidance; extracellular matrix disassembly			Fibroblasts | Smooth muscle cells	0.288857	0.0160214	0.0770313	0.318351	0.00496438	0.0388275	0.462997	6.70008e-05	0.00988962	0.450104	1.51155e-05	0.00137301	0.124772	0.0559956	0.186044	0.142906	0.0228704	0.119263	0.239881	0.121398	0.797116	0.234343	0.130928	0.770693	0.657802	0.0182592	0.268194	0.657525	0.0194162	0.302148
ENSG00000013364	MVP	major vault protein [Source:HGNC Symbol;Acc:HGNC:7531]	9961	protein transport; mRNA transport	protein transport			0.503671	1.59286e-05	0.00368877	0.469318	2.07972e-05	0.00320258	0.465465	7.11332e-05	0.00988962	0.409474	9.62185e-05	0.00261984	0.25283	7.11775e-05	0.0152316	0.241588	7.60193e-05	0.0100502	0.492808	0.00162064	0.567235	0.50978	0.000759542	0.329187	0.67951	0.0180541	0.26771	0.716994	0.0105809	0.254306
ENSG00000100100	PIK3IP1	phosphoinositide-3-kinase interacting protein 1 [Source:HGNC Symbol;Acc:HGNC:24942]	113791				T-cells	0.367452	0.00220807	0.0291971	0.380132	0.000706767	0.0148412	0.465314	7.48356e-05	0.00988962	0.450688	1.46933e-05	0.00137301	0.156219	0.0173132	0.11036	0.170369	0.00634083	0.064646	0.461193	0.00315524	0.579102	0.480513	0.00156439	0.403576	0.915606	0.00117783	0.135225	0.915674	0.000955673	0.136646
ENSG00000196878	LAMB3	laminin subunit beta 3 [Source:HGNC Symbol;Acc:HGNC:6490]	3914	extracellular matrix organization; cell adhesion; endodermal cell differentiation; extracellular matrix disassembly; cell junction assembly				0.359559	0.00267963	0.0319248	0.35434	0.00166816	0.0226661	0.463606	7.51675e-05	0.00988962	0.422045	5.55976e-05	0.00216905	0.12174	0.0644179	0.197911	0.126417	0.0447765	0.16412	0.39068	0.0143493	0.638764	0.368962	0.0163629	0.574659	0.195182	0.507271	0.654701	0.171026	0.548773	0.696987
ENSG00000136379	ABHD17C	abhydrolase domain containing 17C, depalmitoylase [Source:HGNC Symbol;Acc:HGNC:26925]	58489	metabolic process				0.232745	0.0472932	0.136032	0.298291	0.00865938	0.0515516	0.447254	7.66215e-05	0.00988962	0.486401	2.35973e-06	0.000554254	0.151129	0.0167243	0.108427	0.182051	0.00343896	0.047587	0.305359	0.0529068	0.76927	0.26219	0.0905266	0.716311	0.568852	0.046921	0.344811	0.553683	0.050037	0.374067
ENSG00000227117	HORMAD2-AS1	HORMAD2 and MTMR3 antisense RNA 1 [Source:HGNC Symbol;Acc:HGNC:50729]	101929664			*		-0.315803	0.00751511	0.0525491	-0.308229	0.00660276	0.0452782	-0.453757	7.87696e-05	0.00988962	-0.402703	0.000128178	0.00297024	-0.164264	0.0102968	0.0894676	-0.159985	0.0105601	0.0816162	0.287158	0.0653207	0.770375	0.269623	0.0816123	0.702638	0.315743	0.267352	0.546477	0.329176	0.247212	0.563593
ENSG00000130005	GAMT	guanidinoacetate N-methyltransferase [Source:HGNC Symbol;Acc:HGNC:4136]	2593	small molecule metabolic process; cellular nitrogen compound metabolic process; methylation	muscle contraction	*	Hepatocytes	-0.337085	0.00367121	0.0368043	-0.361671	0.00131573	0.0201955	-0.447274	7.8804e-05	0.00988962	-0.434658	3.13859e-05	0.00181607	-0.185834	0.00304773	0.0511792	-0.193998	0.00176138	0.0365197	0.580436	9.06941e-05	0.453152	0.621193	3.05088e-05	0.242945	0.944718	0.00050688	0.132253	1.0204	0.000207949	0.116877
ENSG00000159398	CES5A	carboxylesterase 5A [Source:HGNC Symbol;Acc:HGNC:26459]	221223			*	Hepatocytes	-0.200382	0.102775	0.203157	-0.229456	0.0450969	0.128282	-0.465707	7.89433e-05	0.00988962	-0.436683	2.85734e-05	0.00173974	-0.0843552	0.205658	0.322586	-0.100018	0.113851	0.250379	0.309817	0.0493285	0.768799	0.295284	0.0560894	0.682706	0.864907	0.00214052	0.15207	0.883652	0.00146782	0.149713
ENSG00000162882	HAAO	3-hydroxyanthranilate 3,4-dioxygenase [Source:HGNC Symbol;Acc:HGNC:4796]	23498	small molecule metabolic process; oxidation-reduction process; cellular nitrogen compound metabolic process; response to cadmium ion	oxidation-reduction process	*	Hepatocytes	-0.364769	0.0022463	0.0291971	-0.38284	0.000643307	0.0140184	-0.460985	7.98911e-05	0.00988962	-0.449815	1.53282e-05	0.00137301	-0.20288	0.00165557	0.0399998	-0.212713	0.000562704	0.0233043	-0.384505	0.0117169	0.63842	-0.329	0.0328678	0.638058	-0.593285	0.0330986	0.305864	-0.514981	0.06875	0.405948
ENSG00000072163	LIMS2	LIM zinc finger domain containing 2 [Source:HGNC Symbol;Acc:HGNC:16084]	55679				Hepatic stellate cells | Endothelial cells	-0.195674	0.0812943	0.178371	-0.266275	0.0195784	0.0817787	-0.425149	8.21433e-05	0.00988962	-0.475386	4.2366e-06	0.000779197	-0.115515	0.0567548	0.186204	-0.146884	0.01924	0.109614	0.322656	0.0399564	0.743933	0.269902	0.0812922	0.702638	0.654843	0.0212756	0.275667	0.550057	0.0515894	0.376511
ENSG00000148057	IDNK	IDNK gluconokinase [Source:HGNC Symbol;Acc:HGNC:31367]	414328					-0.400708	0.000556435	0.0151166	-0.420922	0.000157723	0.00787947	-0.4507	8.24749e-05	0.00988962	-0.443681	2.05666e-05	0.00147102	-0.19496	0.00204746	0.0422455	-0.205294	0.000897045	0.0291318	0.401824	0.0101526	0.63842	0.395133	0.00996275	0.562223	0.577806	0.04326	0.337756	0.546452	0.053172	0.377974
ENSG00000119138	KLF9	KLF transcription factor 9 [Source:HGNC Symbol;Acc:HGNC:1123]	687					-0.264456	0.022247	0.0914268	-0.332608	0.00326994	0.031603	-0.439409	8.71676e-05	0.00988962	-0.484722	2.58305e-06	0.000554254	-0.127499	0.0422839	0.164093	-0.16055	0.0102789	0.0809029	0.531783	0.000616006	0.453152	0.547227	0.000280731	0.309156	0.921455	0.00112329	0.135225	0.939987	0.000682146	0.1278
ENSG00000160613	PCSK7	proprotein convertase subtilisin/kexin type 7 [Source:HGNC Symbol;Acc:HGNC:8748]	9159		protein processing		NK-cells	0.397459	0.00093728	0.0196957	0.320991	0.00460148	0.0373756	0.463686	8.72408e-05	0.00988962	0.335364	0.00163687	0.0102674	0.183464	0.00514022	0.0646791	0.152592	0.0149016	0.0966401	0.164009	0.306458	0.845772	0.138435	0.374188	0.843033	0.402148	0.16623	0.482923	0.408626	0.150063	0.502492
ENSG00000185808	PIGP	phosphatidylinositol glycan anchor biosynthesis class P [Source:HGNC Symbol;Acc:HGNC:3046]	51227					-0.353751	0.00355923	0.0361864	-0.362316	0.0012882	0.0201597	-0.465164	8.75461e-05	0.00988962	-0.433909	3.24889e-05	0.00184548	-0.152254	0.0215797	0.120995	-0.162156	0.00951604	0.078391	0.372312	0.0198111	0.678723	0.371034	0.0157507	0.574659	0.861742	0.00270031	0.16228	0.859067	0.00201771	0.159329
ENSG00000130222	GADD45G	growth arrest and DNA damage inducible gamma [Source:HGNC Symbol;Acc:HGNC:4097]	10912					-0.279494	0.0175165	0.0804016	-0.34642	0.00214306	0.025872	-0.446452	9.058e-05	0.0100356	-0.48478	2.57504e-06	0.000554254	-0.147586	0.0205192	0.118676	-0.180079	0.00382425	0.050415	0.50458	0.000902559	0.453152	0.502785	0.000906622	0.363826	0.941506	0.000632779	0.132253	0.994062	0.000310742	0.127109
ENSG00000258920	FOXN3-AS1	FOXN3 antisense RNA 1 [Source:HGNC Symbol;Acc:HGNC:44290]	400236					-0.179763	0.139209	0.236334	-0.206753	0.0715887	0.16397	-0.455786	9.42524e-05	0.0100375	-0.433591	3.29692e-05	0.00184548	-0.0958046	0.145312	0.282397	-0.110158	0.0811628	0.216221	0.499051	0.00103676	0.476995	0.479261	0.00161181	0.40614	0.935155	0.000693014	0.132253	0.982594	0.000368702	0.127109
ENSG00000153395	LPCAT1	lysophosphatidylcholine acyltransferase 1 [Source:HGNC Symbol;Acc:HGNC:25718]	79888	phospholipid metabolic process; positive regulation of protein catabolic process				0.207494	0.0736067	0.171884	0.287056	0.0116443	0.0615016	0.435327	9.72518e-05	0.0100375	0.497161	1.30706e-06	0.000480788	0.131129	0.0360176	0.153622	0.169751	0.00654194	0.0655016	0.326179	0.0379166	0.737308	0.339608	0.0275018	0.615334	0.603618	0.0343002	0.311666	0.628755	0.0255977	0.316386
ENSG00000204682	MIR1915HG	MIR1915 host gene [Source:HGNC Symbol;Acc:HGNC:31448]	399726					-0.307469	0.0109001	0.0636994	-0.331109	0.00341973	0.0322413	-0.457403	9.77797e-05	0.0100375	-0.447935	1.67832e-05	0.00141916	-0.163634	0.0123276	0.0955812	-0.177597	0.00436352	0.0546497	0.295645	0.0656772	0.770375	0.287005	0.0634904	0.682706	0.458198	0.117152	0.435694	0.445791	0.115968	0.466746
ENSG00000105186	ANKRD27	ankyrin repeat domain 27 [Source:HGNC Symbol;Acc:HGNC:25310]	84079	positive regulation of GTPase activity; protein transport	protein transport			0.340628	0.00346764	0.0356586	0.366977	0.00110437	0.0190369	0.443759	9.84778e-05	0.0100375	0.431782	3.58252e-05	0.00190197	0.189467	0.00261955	0.0488042	0.198421	0.00135915	0.0340307	0.309301	0.0538917	0.770375	0.305313	0.0480863	0.682576	0.454437	0.120179	0.439197	0.473192	0.094922	0.439989
ENSG00000141232	TOB1	transducer of ERBB2, 1 [Source:HGNC Symbol;Acc:HGNC:11979]	10140					-0.411934	0.000555404	0.0151166	-0.420411	0.000160895	0.00790734	-0.458437	9.93092e-05	0.0100375	-0.43782	2.70996e-05	0.00172292	-0.185111	0.00456207	0.0610237	-0.194312	0.0017296	0.0365197	-0.317873	0.0470302	0.765133	-0.306667	0.047082	0.680192	-0.8892	0.00187459	0.147903	-0.86885	0.00177981	0.149713
ENSG00000135932	CAB39	calcium binding protein 39 [Source:HGNC Symbol;Acc:HGNC:20292]	51719	intracellular signal transduction; positive regulation of peptidyl-threonine phosphorylation; cell cycle arrest; positive regulation of peptidyl-serine phosphorylation				0.290289	0.0161109	0.0771522	0.3031	0.00760265	0.0487358	0.454357	0.000104094	0.0103397	0.412718	8.36888e-05	0.00252804	0.157363	0.0159035	0.106359	0.161138	0.00999375	0.0799206	-0.380392	0.0124908	0.63842	-0.433193	0.00456741	0.457325	-0.850355	0.00190359	0.147903	-0.950121	0.000590958	0.1278
ENSG00000164823	OSGIN2	oxidative stress induced growth inhibitor family member 2 [Source:HGNC Symbol;Acc:HGNC:1355]	734					0.323081	0.0059184	0.045912	0.383306	0.000632933	0.0138359	0.443733	0.00010671	0.01042	0.483585	2.74557e-06	0.000565562	0.147719	0.0208242	0.119608	0.179828	0.00387596	0.0507812	-0.338682	0.026378	0.688708	-0.314718	0.0414624	0.670087	-0.429278	0.12385	0.443795	-0.482085	0.0887793	0.430761
ENSG00000189283	FHIT	fragile histidine triad diadenosine triphosphatase [Source:HGNC Symbol;Acc:HGNC:3701]	2272					-0.276932	0.0242066	0.0953892	-0.285463	0.0121331	0.0626512	-0.460155	0.000110994	0.0105383	-0.414835	7.63475e-05	0.00247704	-0.113915	0.0885819	0.228232	-0.122987	0.051041	0.174126	-0.316802	0.0276727	0.697681	-0.404432	0.00828792	0.522093	-0.82062	0.00142994	0.141376	-0.965834	0.000471426	0.127109
ENSG00000278535	DHRS11	dehydrogenase/reductase 11 [Source:HGNC Symbol;Acc:HGNC:28639]	79154	oxidation-reduction process				-0.211764	0.0826246	0.179808	-0.202932	0.0770868	0.169742	-0.454108	0.000111581	0.0105383	-0.392787	0.00019303	0.00359387	-0.120512	0.0676609	0.202206	-0.117302	0.0630015	0.191576	0.270292	0.0835149	0.770751	0.212718	0.170825	0.785315	0.571322	0.0432977	0.337756	0.493923	0.0810967	0.421725
ENSG00000131378	RFTN1	raftlin, lipid raft linker 1 [Source:HGNC Symbol;Acc:HGNC:30278]	23180	T cell receptor signaling pathway; B cell receptor signaling pathway	toll-like receptor 3 signaling pathway		monocytes	0.417977	0.000470067	0.0139438	0.411072	0.000230353	0.00928056	0.455737	0.000115016	0.010669	0.415095	7.54866e-05	0.00247704	0.181007	0.00572237	0.0672191	0.186956	0.00262711	0.0421095	0.40063	0.011578	0.63842	0.393613	0.010263	0.563079	0.805153	0.00501267	0.204847	0.781066	0.00520185	0.222882
ENSG00000164742	ADCY1	adenylate cyclase 1 [Source:HGNC Symbol;Acc:HGNC:232]	107	small molecule metabolic process; response to drug	cellular response to calcium ion; synaptic transmission; circadian rhythm; energy reserve metabolic process; response to drug			-0.338822	0.00317472	0.0343697	-0.414837	0.000199561	0.008643	-0.433254	0.000116668	0.010669	-0.500266	1.09823e-06	0.000462927	-0.155901	0.0127249	0.0968872	-0.197868	0.00140448	0.0341981	-0.340864	0.0267267	0.688708	-0.286714	0.0637636	0.682706	-0.455525	0.105233	0.425477	-0.384252	0.176196	0.520915
ENSG00000213024	NUP62	nucleoporin 62 [Source:HGNC Symbol;Acc:HGNC:8066]	23636	negative regulation of cell proliferation; negative regulation of epidermal growth factor receptor signaling pathway; mRNA transport; spermatogenesis				0.176066	0.152958	0.246792	0.182063	0.113336	0.207273	0.4551	0.000121046	0.0107565	0.39639	0.000166591	0.00337132	0.0946484	0.155654	0.289934	0.0974983	0.123377	0.259651	0.239067	0.129447	0.80019	0.173906	0.263669	0.824143	0.618766	0.0295306	0.29904	0.524686	0.063595	0.396642
ENSG00000114200	BCHE	butyrylcholinesterase [Source:HGNC Symbol;Acc:HGNC:983]	590	response to glucocorticoid; response to drug			Hepatocytes	-0.253342	0.0402211	0.124563	-0.246643	0.0309606	0.104605	-0.45884	0.000121845	0.0107565	-0.395601	0.000172076	0.00339521	-0.149964	0.0244604	0.127238	-0.147202	0.018973	0.109154	-0.212831	0.183064	0.819411	-0.204889	0.187283	0.799221	-0.582377	0.0434327	0.337864	-0.532992	0.0594371	0.386597
ENSG00000151729	SLC25A4	solute carrier family 25 member 4 [Source:HGNC Symbol;Acc:HGNC:10990]	291	small molecule metabolic process; generation of precursor metabolites and energy	energy reserve metabolic process			-0.478173	2.30771e-05	0.00453583	-0.517271	2.07695e-06	0.000820807	-0.434963	0.000127646	0.0107565	-0.463673	7.72991e-06	0.00109555	-0.224466	0.000290122	0.0204913	-0.245384	5.70771e-05	0.00937241	0.342452	0.0319999	0.71947	0.310427	0.0443834	0.675607	0.597204	0.0396514	0.328457	0.563136	0.0461697	0.368215
ENSG00000169085	VXN	vexin [Source:HGNC Symbol;Acc:HGNC:28498]	254778					-0.251845	0.0383233	0.121405	-0.197171	0.0860109	0.178771	-0.450443	0.000128486	0.0107565	-0.340269	0.00138402	0.00934123	-0.141144	0.031752	0.145632	-0.119328	0.0585027	0.185932	0.319268	0.0435428	0.754853	0.333198	0.0306475	0.626541	0.845568	0.00284041	0.16615	0.854879	0.00212806	0.161375
ENSG00000175264	CHST1	carbohydrate sulfotransferase 1 [Source:HGNC Symbol;Acc:HGNC:1969]	8534	glycosaminoglycan metabolic process				0.27607	0.0190898	0.0840278	0.322509	0.00440363	0.0365017	0.437705	0.000129326	0.0107565	0.451738	1.39626e-05	0.00137301	0.148389	0.0199188	0.11771	0.169876	0.00650088	0.0652674	0.420157	0.00742621	0.605959	0.42444	0.00549912	0.478815	0.761194	0.00756763	0.222568	0.749311	0.00745105	0.243153
ENSG00000179698	WDR97	WD repeat domain 97 [Source:HGNC Symbol;Acc:HGNC:26959]	340390					-0.337986	0.00456891	0.0403938	-0.276022	0.0154129	0.0717343	-0.445542	0.000131935	0.0107565	-0.333486	0.00174433	0.0105786	-0.161517	0.0127071	0.0968872	-0.137904	0.0282525	0.132336	0.261966	0.0997779	0.792965	0.24891	0.108353	0.740236	0.766382	0.00723431	0.222568	0.746813	0.0076599	0.243153
ENSG00000139083	ETV6	ETS variant transcription factor 6 [Source:HGNC Symbol;Acc:HGNC:3495]	2120					0.259179	0.0346559	0.115114	0.267027	0.0192258	0.0809397	0.453884	0.000132878	0.0107565	0.410929	9.03953e-05	0.00261132	0.126921	0.0564713	0.186204	0.133176	0.0342896	0.144704	-0.34314	0.0295518	0.713991	-0.378322	0.0137525	0.563079	-0.639026	0.0255262	0.290481	-0.697769	0.0129444	0.272715
ENSG00000124713	GNMT	glycine N-methyltransferase [Source:HGNC Symbol;Acc:HGNC:4415]	27232	one-carbon metabolic process; protein homotetramerization; methylation		*	Hepatocytes | Erythroid cells	-0.339727	0.00460984	0.0404586	-0.371366	0.000953448	0.0176026	-0.447526	0.000135674	0.0107565	-0.44582	1.85744e-05	0.00144907	-0.158302	0.0153013	0.104519	-0.177147	0.00446831	0.0550994	-0.283836	0.0651795	0.770375	-0.322194	0.0367555	0.647868	-0.493923	0.0774298	0.392477	-0.563855	0.045886	0.368133
ENSG00000221869	CEBPD	CCAAT enhancer binding protein delta [Source:HGNC Symbol;Acc:HGNC:1835]	1052					-0.236134	0.0373289	0.119622	-0.30108	0.00803181	0.0498847	-0.418792	0.000136039	0.0107565	-0.453595	1.27533e-05	0.00133035	-0.116357	0.058464	0.189479	-0.143877	0.0219342	0.116271	0.193102	0.226961	0.832847	0.196363	0.206484	0.804834	0.961636	0.00064928	0.132253	0.974228	0.000417083	0.127109
ENSG00000143257	NR1I3	nuclear receptor subfamily 1 group I member 3 [Source:HGNC Symbol;Acc:HGNC:7969]	9970	steroid hormone mediated signaling pathway		*	Hepatocytes	-0.309863	0.00851248	0.0556759	-0.364378	0.00120369	0.0197189	-0.437696	0.000138156	0.0107565	-0.466083	6.84212e-06	0.00104426	-0.179026	0.00483941	0.0628186	-0.203945	0.000974495	0.0299576	0.284404	0.0647561	0.770375	0.307502	0.046471	0.680192	0.32857	0.242697	0.53454	0.342351	0.228658	0.551739
ENSG00000138835	RGS3	regulator of G protein signaling 3 [Source:HGNC Symbol;Acc:HGNC:9999]	5998	positive regulation of GTPase activity			Endothelial cells	0.218507	0.0753944	0.172428	0.246279	0.0312161	0.104855	0.451703	0.000139065	0.0107565	0.428227	4.21241e-05	0.00207616	0.101765	0.12679	0.266153	0.11713	0.063397	0.191576	-0.283291	0.0714558	0.770375	-0.288388	0.0622016	0.682706	-0.268856	0.349388	0.586233	-0.268081	0.346594	0.617961
ENSG00000180425	C11orf71	chromosome 11 open reading frame 71 [Source:HGNC Symbol;Acc:HGNC:25937]	54494					-0.285292	0.0192503	0.0842186	-0.296642	0.00905028	0.0531933	-0.450778	0.000140029	0.0107565	-0.425709	4.7195e-05	0.00213356	-0.150476	0.0226121	0.123082	-0.15997	0.0105674	0.0816162	0.29402	0.0677213	0.770375	0.274378	0.0762875	0.699897	0.771088	0.00765599	0.222721	0.746832	0.00765831	0.243153
ENSG00000087085	ACHE	acetylcholinesterase (Cartwright blood group) [Source:HGNC Symbol;Acc:HGNC:108]	43	cell adhesion; phospholipid metabolic process; synaptic transmission				0.308815	0.0119691	0.0666411	0.285135	0.0122358	0.0628999	0.454773	0.00014406	0.0109205	0.377154	0.000359044	0.00479013	0.153841	0.0210362	0.120095	0.147505	0.0187207	0.108827	0.297523	0.0569672	0.770375	0.286863	0.063624	0.682706	0.527607	0.0631506	0.371978	0.496475	0.0795126	0.419841
ENSG00000141504	SAT2	spermidine/spermine N1-acetyltransferase family member 2 [Source:HGNC Symbol;Acc:HGNC:23160]	112483					-0.367103	0.0020241	0.027972	-0.403497	0.000306002	0.0104974	-0.443445	0.0001479	0.011066	-0.459435	9.55922e-06	0.00120129	-0.202308	0.00164822	0.0399998	-0.222932	0.000286906	0.0186837	0.293573	0.064142	0.770375	0.250306	0.106359	0.73849	0.470128	0.103308	0.423491	0.414207	0.144511	0.496413
ENSG00000204228	HSD17B8	hydroxysteroid 17-beta dehydrogenase 8 [Source:HGNC Symbol;Acc:HGNC:3554]	7923	oxidation-reduction process; androgen metabolic process; fatty acid biosynthetic process				-0.238351	0.0437644	0.130821	-0.291687	0.0103197	0.0575779	-0.433313	0.000151898	0.0112194	-0.447901	1.68102e-05	0.00141916	-0.128116	0.0451995	0.169268	-0.150818	0.0161486	0.101038	-0.334256	0.0351518	0.727113	-0.284962	0.0654337	0.6834	-0.548699	0.0574367	0.363264	-0.491298	0.0827533	0.421773
ENSG00000114354	TFG	trafficking from ER to golgi regulator [Source:HGNC Symbol;Acc:HGNC:11758]	10342	signal transduction				0.261973	0.0316532	0.110234	0.28475	0.0123574	0.0631972	0.446372	0.000158979	0.0115938	0.428306	4.19734e-05	0.00207616	0.120891	0.0678518	0.202386	0.135259	0.0315087	0.138752	0.239395	0.131521	0.803334	0.241897	0.11881	0.756576	0.893101	0.00153917	0.141781	0.872642	0.00169465	0.149713
ENSG00000276409	CCL14	C-C motif chemokine ligand 14 [Source:HGNC Symbol;Acc:HGNC:10612]	6358	cellular response to tumor necrosis factor	cellular response to tumor necrosis factor; positive regulation of cell proliferation		Hepatic stellate cells | Endothelial cells	-0.374195	0.00104876	0.0204234	-0.323108	0.00432774	0.0362192	-0.42473	0.000162731	0.011719	-0.336876	0.0015548	0.00996061	-0.16827	0.0069911	0.0742725	-0.145089	0.0208118	0.113243	-0.346595	0.023916	0.684653	-0.342995	0.0259536	0.608675	-0.941537	0.000573945	0.132253	-0.910086	0.00103123	0.136646
ENSG00000115652	UXS1	UDP-glucuronate decarboxylase 1 [Source:HGNC Symbol;Acc:HGNC:17729]	80146					0.450149	0.000165655	0.00869147	0.433864	9.42888e-05	0.00628253	0.448246	0.000166476	0.0118407	0.409367	9.66585e-05	0.00261984	0.205096	0.00172979	0.0404502	0.205049	0.000910704	0.0291318	0.259717	0.0926387	0.77938	0.290847	0.0599624	0.682706	0.357041	0.204533	0.506502	0.448332	0.113877	0.464274
ENSG00000130227	XPO7	exportin 7 [Source:HGNC Symbol;Acc:HGNC:14108]	23039	mRNA transport			Erythroid cells	0.291034	0.0141741	0.0722692	0.28176	0.0133389	0.0657887	0.434502	0.000169099	0.0118682	0.385087	0.000263029	0.00412955	0.149634	0.0199736	0.11771	0.146474	0.0195896	0.110499	-0.353613	0.0222745	0.684653	-0.378187	0.0137873	0.563079	-0.72606	0.00944179	0.233757	-0.797336	0.00430222	0.214099
ENSG00000103160	HSDL1	hydroxysteroid dehydrogenase like 1 [Source:HGNC Symbol;Acc:HGNC:16475]	83693					0.124879	0.316046	0.352887	0.114852	0.319867	0.35096	0.449345	0.00017106	0.0118682	0.362623	0.000622528	0.00620092	0.0714201	0.289077	0.375957	0.0653744	0.303288	0.386393	-0.276369	0.0730263	0.770375	-0.296316	0.0552184	0.682706	-0.860475	0.0017386	0.146661	-0.881693	0.00150605	0.149713
ENSG00000164850	GPER1	G protein-coupled estrogen receptor 1 [Source:HGNC Symbol;Acc:HGNC:4485]	2852	cellular response to estradiol stimulus; steroid hormone mediated signaling pathway; cellular response to tumor necrosis factor			Hepatocytes | Kupffer cells | Endothelial cells	-0.200089	0.0935344	0.19301	-0.272413	0.0168562	0.0756031	-0.431864	0.00017622	0.0118682	-0.471896	5.07907e-06	0.000843743	-0.112057	0.0824122	0.221389	-0.146605	0.0194776	0.110287	-0.281607	0.0620539	0.770375	-0.352036	0.0221784	0.589408	-0.52811	0.0538072	0.358096	-0.602465	0.0326388	0.333895
ENSG00000161091	MFSD12	major facilitator superfamily domain containing 12 [Source:HGNC Symbol;Acc:HGNC:28299]	126321		transport			0.593972	2.55066e-07	0.000349619	0.541578	5.69542e-07	0.000479477	0.445548	0.000176685	0.0118682	0.370978	0.000455046	0.00532587	0.283179	8.22491e-06	0.0051336	0.263402	1.35196e-05	0.00514219	0.343876	0.0280559	0.699715	0.319756	0.0382388	0.647868	0.697479	0.0138112	0.251853	0.67741	0.0159354	0.288371
ENSG00000080561	MID2	midline 2 [Source:HGNC Symbol;Acc:HGNC:7096]	11043	protein ubiquitination; positive regulation of NF-kappaB transcription factor activity; innate immune response				0.189541	0.121809	0.22112	0.217824	0.0574224	0.14597	0.442533	0.00017858	0.0118682	0.42441	5.00278e-05	0.00216497	0.0847687	0.201914	0.320538	0.101261	0.10937	0.246005	0.357205	0.0253475	0.688559	0.346949	0.0242403	0.606827	0.683958	0.0181881	0.267957	0.68471	0.0148006	0.285115
ENSG00000141293	SKAP1	src kinase associated phosphoprotein 1 [Source:HGNC Symbol;Acc:HGNC:15605]	8631				NK-cells | dendritic cells | granulocytes | T-cells	-0.35396	0.003736	0.0369386	-0.344265	0.00229179	0.0265582	-0.448437	0.000179223	0.0118682	-0.393786	0.000185336	0.0034961	-0.176305	0.00782973	0.0789868	-0.175476	0.00487729	0.0570248	0.252816	0.101642	0.793115	0.263825	0.0885025	0.711371	0.477899	0.0881548	0.407944	0.524583	0.0636483	0.396704
ENSG00000151332	MBIP	MAP3K12 binding inhibitory protein 1 [Source:HGNC Symbol;Acc:HGNC:20427]	51562					-0.336171	0.00314807	0.0343207	-0.319115	0.00485685	0.0383763	-0.417747	0.000185119	0.0120354	-0.374828	0.000392769	0.00498711	-0.114584	0.0669154	0.20156	-0.11581	0.0664947	0.196461	0.166899	0.290084	0.845772	0.113973	0.464708	0.856902	0.571225	0.0443531	0.340867	0.541447	0.0554351	0.380372
ENSG00000077684	JADE1	jade family PHD finger 1 [Source:HGNC Symbol;Acc:HGNC:30027]	79960					-0.320505	0.00650846	0.0485803	-0.270476	0.0176773	0.0774316	-0.430508	0.000185925	0.0120354	-0.342724	0.00127126	0.0089439	-0.141008	0.0280583	0.136285	-0.121957	0.053057	0.177695	0.348371	0.0255446	0.688559	0.287348	0.0631684	0.682706	0.600345	0.0343242	0.311666	0.513032	0.0698244	0.406912
ENSG00000258708	SLC25A21-AS1	SLC25A21 antisense RNA 1 [Source:HGNC Symbol;Acc:HGNC:44298]	100129794					-0.19532	0.105605	0.205439	-0.153572	0.182552	0.265892	-0.433402	0.000198675	0.0123267	-0.34571	0.00114535	0.00854823	-0.124915	0.055037	0.184952	-0.108916	0.0847101	0.219947	0.344231	0.0289108	0.71049	0.322576	0.0365277	0.647868	0.662808	0.0203046	0.27187	0.674492	0.0164097	0.291199
ENSG00000171174	RBKS	ribokinase [Source:HGNC Symbol;Acc:HGNC:30325]	64080					-0.0723817	0.543934	0.462568	-0.0980149	0.396283	0.389129	-0.425259	0.000200747	0.0123267	-0.397518	0.000159026	0.00335634	-0.048372	0.453258	0.459257	-0.0574841	0.365694	0.417515	0.291522	0.0695785	0.770375	0.26417	0.0880796	0.710236	0.640583	0.0273989	0.294438	0.608966	0.0307612	0.330431
ENSG00000166275	BORCS7	BLOC-1 related complex subunit 7 [Source:HGNC Symbol;Acc:HGNC:23516]	119032					-0.217297	0.0776744	0.175023	-0.223892	0.0506879	0.137779	-0.442373	0.000202249	0.0123267	-0.381659	0.000301166	0.00442413	-0.113439	0.0888906	0.228658	-0.11714	0.0633744	0.191576	0.298211	0.0546586	0.770375	0.279998	0.0703565	0.688301	0.689914	0.0137067	0.251853	0.731218	0.00908418	0.253076
ENSG00000197272	IL27	interleukin 27 [Source:HGNC Symbol;Acc:HGNC:19157]	246778			*	Hepatocytes	-0.454865	9.8914e-05	0.00741787	-0.470799	1.94585e-05	0.00316949	-0.434024	0.000202793	0.0123267	-0.436576	2.87155e-05	0.00173974	-0.237944	0.000174847	0.0202023	-0.249084	4.29287e-05	0.00828128	0.192576	0.228919	0.832847	0.14023	0.367999	0.843033	0.517614	0.0734735	0.387189	0.454817	0.10867	0.459621
ENSG00000125652	ALKBH7	alkB homolog 7 [Source:HGNC Symbol;Acc:HGNC:21306]	84266	oxidation-reduction process; fatty acid metabolic process	oxidation-reduction process			-0.382271	0.00130471	0.0220665	-0.385052	0.00059539	0.0134391	-0.435781	0.000203019	0.0123267	-0.416701	7.03784e-05	0.00247704	-0.18014	0.00544296	0.0661799	-0.185817	0.00279859	0.0434445	0.230346	0.150716	0.814915	0.219902	0.156684	0.784872	0.703616	0.0145115	0.251853	0.663866	0.0182413	0.299987
ENSG00000171202	TMEM126A	transmembrane protein 126A [Source:HGNC Symbol;Acc:HGNC:25382]	84233					-0.233928	0.0562846	0.149455	-0.21173	0.0649067	0.156281	-0.440641	0.00020377	0.0123267	-0.372567	0.000428323	0.00521171	-0.0953183	0.152428	0.287672	-0.0920544	0.146032	0.279335	-0.427267	0.00578332	0.605959	-0.449025	0.00323284	0.457325	-0.57781	0.0418198	0.333211	-0.640274	0.0229465	0.306345
ENSG00000162704	ARPC5	actin related protein 2/3 complex subunit 5 [Source:HGNC Symbol;Acc:HGNC:708]	10092	Fc-gamma receptor signaling pathway involved in phagocytosis; actin cytoskeleton organization; cell migration; axon guidance; ephrin receptor signaling pathway; small GTPase mediated signal transduction; movement of cell or subcellular component; innate immune response	Arp2/3 complex-mediated actin nucleation; actin cytoskeleton organization; innate immune response; cell migration; Fc-gamma receptor signaling pathway involved in phagocytosis; ephrin receptor signaling pathway			0.379794	0.00124237	0.0217349	0.423722	0.000141336	0.00777302	0.430869	0.000205402	0.0123267	0.454394	1.22636e-05	0.00133035	0.208406	0.00104671	0.0319603	0.229724	0.000179587	0.0143913	0.292846	0.0599905	0.770375	0.29551	0.0558978	0.682706	0.743664	0.0078893	0.22389	0.723795	0.00984034	0.253076
ENSG00000159110	IFNAR2	interferon alpha and beta receptor subunit 2 [Source:HGNC Symbol;Acc:HGNC:5433]	3455				Plasma cells	0.426548	0.00036107	0.0123917	0.398381	0.000369393	0.0114787	0.440108	0.000211143	0.0124695	0.390947	0.000207981	0.00378465	0.159539	0.015579	0.104978	0.157766	0.0117288	0.0848845	0.417117	0.00751144	0.605959	0.378541	0.0136959	0.563079	0.564926	0.0481881	0.345879	0.540486	0.0558784	0.380687
ENSG00000204219	TCEA3	transcription elongation factor A3 [Source:HGNC Symbol;Acc:HGNC:11615]	6920					-0.297829	0.0129714	0.0694258	-0.340245	0.00259442	0.0277916	-0.432697	0.000214579	0.0124695	-0.442139	2.21255e-05	0.0014995	-0.168489	0.00926306	0.0864419	-0.188051	0.00247133	0.0412643	-0.388715	0.014251	0.638764	-0.400001	0.00905215	0.538257	-0.611869	0.034395	0.311666	-0.646206	0.0216754	0.305717
ENSG00000074660	SCARF1	scavenger receptor class F member 1 [Source:HGNC Symbol;Acc:HGNC:16820]	8578	signal transduction; cell adhesion; positive regulation of neuron projection development			Hepatic stellate cells | Endothelial cells	0.180321	0.134915	0.232231	0.219348	0.0556662	0.143759	0.430427	0.000215522	0.0124695	0.41852	6.4979e-05	0.00240739	0.12108	0.0626276	0.195446	0.13985	0.026043	0.127781	0.321542	0.0440636	0.754853	0.291783	0.0591273	0.682706	0.915415	0.00131257	0.141376	0.844677	0.00241995	0.172554
ENSG00000204822	MRPL53	mitochondrial ribosomal protein L53 [Source:HGNC Symbol;Acc:HGNC:16684]	116540					-0.297112	0.0121233	0.0670067	-0.326719	0.00389418	0.0342886	-0.427439	0.00021644	0.0124695	-0.433144	3.36538e-05	0.00186354	-0.174034	0.00644165	0.0708746	-0.188564	0.00240121	0.0412189	0.270315	0.0916629	0.77938	0.276495	0.0740083	0.694873	0.543517	0.0613186	0.368505	0.561909	0.0466572	0.368735
ENSG00000129214	SHBG	sex hormone binding globulin [Source:HGNC Symbol;Acc:HGNC:10839]	6462			*		-0.445379	0.000149381	0.0084989	-0.449383	4.95819e-05	0.00479191	-0.433303	0.00021864	0.0124716	-0.40443	0.000119203	0.00288202	-0.283793	5.52293e-06	0.0051336	-0.282186	2.59153e-06	0.00239369	-0.23733	0.140803	0.804748	-0.215865	0.164519	0.785315	-0.36134	0.21771	0.517308	-0.333783	0.24061	0.557968
ENSG00000115841	RMDN2	regulator of microtubule dynamics 2 [Source:HGNC Symbol;Acc:HGNC:26567]	151393					-0.24412	0.039566	0.123571	-0.297494	0.00884628	0.0523047	-0.424623	0.000223994	0.0125885	-0.445655	1.87213e-05	0.00144907	-0.116324	0.0706556	0.205125	-0.141533	0.0242522	0.123166	0.288065	0.0713873	0.770375	0.264677	0.0874625	0.710236	0.720482	0.0122506	0.246801	0.690903	0.0138933	0.279675
ENSG00000165458	INPPL1	inositol polyphosphate phosphatase like 1 [Source:HGNC Symbol;Acc:HGNC:6080]	3636	phosphatidylinositol biosynthetic process; cell adhesion; endocytosis; negative regulation of cell proliferation; phospholipid metabolic process; actin filament organization; negative regulation of gene expression				0.284843	0.0200551	0.0865804	0.2647	0.0203351	0.0839068	0.439449	0.000228525	0.0125885	0.37177	0.000441533	0.00525126	0.141525	0.0331666	0.14885	0.134816	0.0320834	0.139954	-0.440511	0.00363522	0.591752	-0.440093	0.00393491	0.457325	-0.484584	0.0827588	0.401695	-0.472208	0.0956213	0.440991
ENSG00000119778	ATAD2B	ATPase family AAA domain containing 2B [Source:HGNC Symbol;Acc:HGNC:29230]	54454					0.369566	0.00210512	0.0284964	0.375945	0.0008162	0.0162995	0.436093	0.000228614	0.0125885	0.399967	0.000143689	0.00314879	0.150761	0.0219581	0.12186	0.157712	0.0117583	0.0850154	0.382244	0.0127713	0.63842	0.301492	0.0510158	0.682706	0.628972	0.0244986	0.286955	0.534286	0.0588099	0.386025
ENSG00000255153	TOLLIP-DT	TOLLIP divergent transcript [Source:HGNC Symbol;Acc:HGNC:27403]	255512					-0.294309	0.0145441	0.0730933	-0.309693	0.00633939	0.0445984	-0.432665	0.00022943	0.0125885	-0.4143	7.81442e-05	0.00249953	-0.150564	0.0211023	0.120095	-0.16102	0.0100502	0.080167	0.225155	0.158679	0.814915	0.214387	0.167459	0.785315	0.486191	0.0929165	0.413587	0.481908	0.0888987	0.430761
ENSG00000100024	UPB1	beta-ureidopropionase 1 [Source:HGNC Symbol;Acc:HGNC:16297]	51733	small molecule metabolic process		*	Hepatocytes | monocytes	-0.26449	0.028655	0.104842	-0.290039	0.0107751	0.0587467	-0.431591	0.000239222	0.0128431	-0.413052	8.24863e-05	0.00252804	-0.137073	0.0363	0.153985	-0.148341	0.0180404	0.10692	0.1672	0.289252	0.845772	0.110608	0.478033	0.856902	0.44879	0.115813	0.434696	0.368248	0.19508	0.529771
ENSG00000080815	PSEN1	presenilin 1 [Source:HGNC Symbol;Acc:HGNC:9508]	5663	extracellular matrix organization; intracellular signal transduction; T cell receptor signaling pathway; canonical Wnt signaling pathway; calcium ion transmembrane transport; Notch signaling pathway; positive regulation of apoptotic process; extracellular matrix disassembly; protein transport; hematopoietic progenitor cell differentiation				0.241067	0.0475088	0.136379	0.27394	0.0162319	0.0740897	0.433165	0.000240323	0.0128431	0.432394	3.48342e-05	0.00186863	0.090278	0.172692	0.3015	0.112719	0.074224	0.206967	-0.44835	0.00253633	0.579102	-0.515696	0.000652549	0.309156	-0.824741	0.00220937	0.15207	-0.90815	0.00105866	0.136646
ENSG00000099860	GADD45B	growth arrest and DNA damage inducible beta [Source:HGNC Symbol;Acc:HGNC:4096]	4616				Smooth muscle cells	-0.444879	7.5723e-05	0.00647973	-0.512034	2.71315e-06	0.000940053	-0.413443	0.0002426	0.0128431	-0.484756	2.57833e-06	0.000554254	-0.207067	0.000769736	0.0281967	-0.24354	6.5651e-05	0.0100502	0.301279	0.0581754	0.770375	0.278712	0.0716801	0.689855	0.774641	0.00670539	0.220985	0.744037	0.00789801	0.245811
ENSG00000205707	ETFRF1	electron transfer flavoprotein regulatory factor 1 [Source:HGNC Symbol;Acc:HGNC:27052]	144363					-0.38244	0.00122383	0.0216621	-0.388107	0.000534556	0.0131668	-0.428617	0.000243858	0.0128431	-0.407596	0.000104246	0.00269648	-0.18499	0.00406945	0.0589268	-0.18927	0.00230767	0.0407278	0.325089	0.0405672	0.743933	0.279692	0.0706703	0.688924	0.960532	0.000667974	0.132253	0.871081	0.00172924	0.149713
ENSG00000156885	COX6A2	cytochrome c oxidase subunit 6A2 [Source:HGNC Symbol;Acc:HGNC:2279]	1339	generation of precursor metabolites and energy; hydrogen ion transmembrane transport				-0.418954	0.000386275	0.012507	-0.450172	4.79499e-05	0.00479191	-0.430122	0.000245474	0.0128431	-0.442593	2.16549e-05	0.0014995	-0.19942	0.00195986	0.041847	-0.220176	0.000345306	0.0192621	0.31394	0.049784	0.768799	0.293409	0.0576999	0.682706	0.606472	0.0365974	0.318383	0.614513	0.0292321	0.327041
ENSG00000137960	GIPC2	GIPC PDZ domain containing family member 2 [Source:HGNC Symbol;Acc:HGNC:18177]	54810					-0.191864	0.115835	0.21526	-0.23146	0.0432132	0.125482	-0.431869	0.000247446	0.0128431	-0.430537	3.79228e-05	0.00197266	-0.0936899	0.15639	0.290581	-0.114389	0.0699632	0.201237	0.548787	0.000430232	0.453152	0.520649	0.000573756	0.309156	1.05804	0.000172547	0.0940049	1.03584	0.000163337	0.108667
ENSG00000131473	ACLY	ATP citrate lyase [Source:HGNC Symbol;Acc:HGNC:115]	47		triglyceride biosynthetic process; small molecule metabolic process			0.360374	0.00180383	0.0261939	0.35808	0.00147887	0.0214412	0.416631	0.000252865	0.0129812	0.390967	0.000207814	0.00378465	0.19235	0.00209654	0.0429431	0.190753	0.00212189	0.0395827	-0.336908	0.0293569	0.712288	-0.352355	0.0220543	0.589408	-0.627779	0.0252632	0.289747	-0.686762	0.0144944	0.283214
ENSG00000010292	NCAPD2	non-SMC condensin I complex subunit D2 [Source:HGNC Symbol;Acc:HGNC:24305]	9918				Erythroid cells	0.340424	0.00413478	0.0382135	0.299973	0.00827599	0.0505831	0.425832	0.000258832	0.0129812	0.353064	0.000882187	0.00734143	0.150289	0.0202749	0.118083	0.136082	0.0304625	0.136544	0.300298	0.0611173	0.770375	0.298399	0.0534941	0.682706	0.0483471	0.869418	0.756142	0.0657915	0.817731	0.778524
ENSG00000017797	RALBP1	ralA binding protein 1 [Source:HGNC Symbol;Acc:HGNC:9841]	10928	signal transduction; endocytosis; positive regulation of GTPase activity; small GTPase mediated signal transduction; regulation of small GTPase mediated signal transduction; chemotaxis	transmembrane transport; regulation of GTPase activity; transport			0.414306	0.000538739	0.0148941	0.364062	0.00121629	0.0198203	0.433984	0.000258869	0.0129812	0.343994	0.00121626	0.00884141	0.201392	0.00201541	0.041847	0.180373	0.00376454	0.0501052	0.219001	0.154493	0.814915	0.230139	0.138067	0.775744	0.530126	0.0565429	0.362048	0.584034	0.0384941	0.34682
ENSG00000138071	ACTR2	actin related protein 2 [Source:HGNC Symbol;Acc:HGNC:169]	10097	Fc-gamma receptor signaling pathway involved in phagocytosis; axon guidance; ephrin receptor signaling pathway; small GTPase mediated signal transduction; movement of cell or subcellular component; innate immune response	Arp2/3 complex-mediated actin nucleation; innate immune response; Fc-gamma receptor signaling pathway involved in phagocytosis; ephrin receptor signaling pathway			0.42737	0.000213763	0.00968866	0.46287	2.76954e-05	0.00383837	0.420469	0.000259119	0.0129812	0.449633	1.54637e-05	0.00137301	0.227851	0.000268805	0.0204913	0.247676	4.78746e-05	0.00862826	0.354393	0.0253401	0.688559	0.310066	0.0446365	0.675607	0.572839	0.0471874	0.344811	0.524069	0.063913	0.39706
ENSG00000104093	DMXL2	Dmx like 2 [Source:HGNC Symbol;Acc:HGNC:2938]	23312				Macrophages | Kupffer cells	0.337451	0.00326442	0.03472	0.388354	0.00052991	0.0131668	0.411121	0.000267408	0.013164	0.46488	7.27258e-06	0.00107006	0.174785	0.0049533	0.0637162	0.205081	0.000908874	0.0291318	-0.362842	0.0232693	0.684653	-0.345023	0.0250621	0.608348	-0.700536	0.0156367	0.255987	-0.698844	0.012801	0.271987
ENSG00000164309	CMYA5	cardiomyopathy associated 5 [Source:HGNC Symbol;Acc:HGNC:14305]	202333					-0.308444	0.00829697	0.055221	-0.292103	0.0102073	0.0573199	-0.416252	0.000272656	0.013164	-0.362074	0.000635299	0.00629161	-0.164885	0.0091396	0.0859975	-0.159427	0.0108438	0.08243	0.218603	0.164397	0.815145	0.176655	0.256143	0.822207	0.399811	0.161333	0.480217	0.339283	0.232889	0.553122
ENSG00000127586	CHTF18	chromosome transmission fidelity factor 18 [Source:HGNC Symbol;Acc:HGNC:18435]	63922					-0.111396	0.370208	0.384268	-0.0705996	0.541576	0.451862	-0.434708	0.000277131	0.013164	-0.321841	0.00256493	0.0130264	-0.0548418	0.415059	0.442459	-0.039219	0.537624	0.492691	0.420594	0.00792418	0.605959	0.38859	0.0113123	0.563079	0.733082	0.0109394	0.237457	0.720555	0.0101873	0.253076
ENSG00000157227	MMP14	matrix metallopeptidase 14 [Source:HGNC Symbol;Acc:HGNC:7160]	4323	extracellular matrix organization; endodermal cell differentiation; positive regulation of cell migration; extracellular matrix disassembly				0.175211	0.144553	0.240686	0.210871	0.0660217	0.157164	0.421452	0.000277726	0.013164	0.425273	4.81283e-05	0.00213356	0.0721302	0.26817	0.362704	0.0933017	0.140584	0.273508	0.336656	0.0279099	0.697681	0.290567	0.0602144	0.682706	0.743779	0.00707354	0.222568	0.629862	0.0253322	0.316386
ENSG00000135447	PPP1R1A	protein phosphatase 1 regulatory inhibitor subunit 1A [Source:HGNC Symbol;Acc:HGNC:9286]	5502				Hepatocytes	-0.208853	0.0808421	0.17814	-0.275734	0.0155242	0.0719153	-0.420837	0.000278892	0.013164	-0.454009	1.24975e-05	0.00133035	-0.109376	0.0912465	0.230571	-0.140973	0.0248364	0.124591	0.392891	0.0120189	0.63842	0.431973	0.00468821	0.457325	0.446841	0.11974	0.438768	0.495207	0.0802967	0.420791
ENSG00000166582	CENPV	centromere protein V [Source:HGNC Symbol;Acc:HGNC:29920]	201161					-0.210791	0.0766564	0.174039	-0.269368	0.0181625	0.0786749	-0.418932	0.000279009	0.013164	-0.456432	1.10934e-05	0.00126952	-0.104244	0.106142	0.245973	-0.137194	0.0290974	0.133795	0.299757	0.0606919	0.770375	0.307943	0.0461512	0.680192	1.05751	0.000173803	0.0940049	1.06227	0.000106956	0.108667
ENSG00000004399	PLXND1	plexin D1 [Source:HGNC Symbol;Acc:HGNC:9107]	23129	axon guidance			Hepatic stellate cells | Endothelial cells | Kupffer cells	0.34908	0.00297876	0.0335177	0.344143	0.00230049	0.0266135	0.419893	0.000282848	0.013164	0.390131	0.000214951	0.00380394	0.203819	0.00128727	0.0355771	0.202968	0.00103431	0.0302336	0.461211	0.00324687	0.579102	0.488793	0.00128127	0.396646	0.405943	0.161546	0.48024	0.442068	0.119086	0.469916
ENSG00000105251	SHD	Src homology 2 domain containing transforming protein D [Source:HGNC Symbol;Acc:HGNC:30633]	56961				Hepatocytes	-0.332388	0.00545006	0.044149	-0.33458	0.00308194	0.0304225	-0.425817	0.000284117	0.013164	-0.401667	0.00013386	0.00304575	-0.189734	0.00328648	0.0527084	-0.191637	0.00201755	0.0388231	0.233577	0.142778	0.806994	0.221995	0.152735	0.784872	0.443336	0.125335	0.445956	0.47896	0.090901	0.432934
ENSG00000214435	AS3MT	arsenite methyltransferase [Source:HGNC Symbol;Acc:HGNC:17452]	57412	methylation				-0.193561	0.108786	0.208188	-0.256234	0.0248461	0.0935036	-0.422926	0.000290051	0.013164	-0.442135	2.21296e-05	0.0014995	-0.0955809	0.1438	0.281504	-0.12529	0.0467613	0.167843	-0.298622	0.0419391	0.750326	-0.370466	0.0159165	0.574659	-0.430267	0.108064	0.428287	-0.467229	0.0992242	0.442057
ENSG00000244067	GSTA2	glutathione S-transferase alpha 2 [Source:HGNC Symbol;Acc:HGNC:4627]	2939	small molecule metabolic process; xenobiotic metabolic process; glutathione metabolic process	xenobiotic metabolic process	*	Cholangiocytes	-0.32687	0.00592492	0.045912	-0.345794	0.00218532	0.0260375	-0.42197	0.000291802	0.013164	-0.415075	7.55545e-05	0.00247704	-0.180218	0.00500675	0.063717	-0.189101	0.00232987	0.0409906	0.272592	0.0865631	0.772937	0.229193	0.139714	0.778278	0.284298	0.327667	0.577282	0.279381	0.326545	0.607415
ENSG00000267680	ZNF224	zinc finger protein 224 [Source:HGNC Symbol;Acc:HGNC:13017]	7767					0.133191	0.257371	0.320869	0.138981	0.228113	0.295533	0.409943	0.000296483	0.013164	0.358233	0.00073157	0.00662932	0.0841225	0.185533	0.309421	0.0876013	0.166785	0.296755	-0.599791	7.8343e-05	0.453152	-0.596164	6.72663e-05	0.242945	-0.930882	0.000856905	0.132253	-0.943576	0.000648473	0.1278
ENSG00000103150	MLYCD	malonyl-CoA decarboxylase [Source:HGNC Symbol;Acc:HGNC:7150]	23417	small molecule metabolic process; cellular lipid metabolic process; fatty acid biosynthetic process				-0.219108	0.0713086	0.169276	-0.257397	0.0241804	0.091952	-0.425717	0.000298456	0.013164	-0.428712	4.12072e-05	0.00207616	-0.103892	0.114781	0.254563	-0.125206	0.0469111	0.168027	0.291713	0.0698062	0.770375	0.285743	0.064685	0.682706	0.219325	0.456311	0.635127	0.237402	0.404807	0.643679
ENSG00000273136	NBPF26	NBPF member 26 [Source:HGNC Symbol;Acc:HGNC:49571]	101060684				Macrophages | Erythroid cells	0.180741	0.136702	0.233538	0.148734	0.196857	0.275974	0.424298	0.000298745	0.013164	0.345873	0.00113882	0.00854059	0.0896671	0.172834	0.301534	0.0807039	0.203112	0.32314	0.271844	0.0851518	0.770751	0.263433	0.0889843	0.713128	0.571237	0.0457073	0.344307	0.533279	0.0592977	0.386385
ENSG00000257093	DENND11	DENN domain containing 11 [Source:HGNC Symbol;Acc:HGNC:29472]	57189				dendritic cells | B-cells | Plasma cells	0.413698	0.000451945	0.0135924	0.397155	0.000386269	0.0117399	0.423894	0.000299029	0.013164	0.396312	0.000167128	0.00337132	0.200819	0.00177967	0.0410574	0.20047	0.0012028	0.032606	0.284888	0.0721925	0.770375	0.28949	0.06119	0.682706	0.93817	0.000856212	0.132253	0.940063	0.000681414	0.1278
ENSG00000163069	SGCB	sarcoglycan beta [Source:HGNC Symbol;Acc:HGNC:10806]	6443					0.389157	0.000859899	0.0187302	0.340943	0.00253941	0.0277638	0.418077	0.000301241	0.013164	0.322601	0.00250224	0.0129127	0.189358	0.00289705	0.050579	0.170034	0.00644916	0.065102	0.464321	0.00308973	0.579102	0.447686	0.00333036	0.457325	1.07795	0.000119466	0.0910797	1.04715	0.000136491	0.108667
ENSG00000005882	PDK2	pyruvate dehydrogenase kinase 2 [Source:HGNC Symbol;Acc:HGNC:8810]	5164	small molecule metabolic process; cellular metabolic process				-0.203378	0.0839238	0.180992	-0.288314	0.0112704	0.060636	-0.411747	0.000301499	0.013164	-0.473433	4.69041e-06	0.000826318	-0.0936014	0.142466	0.280988	-0.138737	0.0272881	0.129851	0.175043	0.271709	0.842326	0.1381	0.375348	0.843033	0.397028	0.168932	0.484565	0.346754	0.22268	0.549502
ENSG00000168411	RFWD3	ring finger and WD repeat domain 3 [Source:HGNC Symbol;Acc:HGNC:25539]	55159	protein ubiquitination				0.206609	0.0946227	0.194217	0.187916	0.102046	0.195828	0.432269	0.000301612	0.013164	0.352163	0.000911151	0.00751958	0.128096	0.0548313	0.184892	0.119256	0.0586571	0.186183	0.433077	0.00408018	0.599014	0.426948	0.00521627	0.475308	0.730254	0.00785981	0.22389	0.761207	0.00652392	0.242701
ENSG00000049540	ELN	elastin [Source:HGNC Symbol;Acc:HGNC:3327]	2006				Fibroblasts	-0.368161	0.00118967	0.021272	-0.410918	0.000231703	0.00928098	-0.405654	0.000305013	0.0132124	-0.453807	1.26212e-05	0.00133035	-0.1582	0.0109209	0.0912882	-0.187078	0.0026094	0.0420995	0.254718	0.113663	0.797116	0.232995	0.133186	0.770693	0.712837	0.0137835	0.251853	0.682938	0.0150694	0.286824
ENSG00000139194	RBP5	retinol binding protein 5 [Source:HGNC Symbol;Acc:HGNC:15847]	83758			*	Hepatocytes	-0.277324	0.0191475	0.0840823	-0.329052	0.00363523	0.0331194	-0.416301	0.000311183	0.0133743	-0.440031	2.44356e-05	0.00157297	-0.150898	0.0184567	0.113402	-0.174232	0.00520302	0.0590544	0.460193	0.00330858	0.579102	0.467728	0.00211388	0.457325	0.638038	0.0264449	0.292922	0.629373	0.0254491	0.316386
ENSG00000134250	NOTCH2	notch receptor 2 [Source:HGNC Symbol;Acc:HGNC:7882]	4853	negative regulation of cell proliferation; cell cycle arrest; Notch signaling pathway				0.22579	0.0483817	0.137588	0.218825	0.0562634	0.144468	0.400238	0.000313396	0.0133743	0.363797	0.000596017	0.00602421	0.0928005	0.135595	0.274259	0.090629	0.152452	0.283749	0.262434	0.0984014	0.792965	0.206302	0.184232	0.798251	0.766594	0.00708362	0.222568	0.696149	0.013163	0.273413
ENSG00000099330	OCEL1	occludin/ELL domain containing 1 [Source:HGNC Symbol;Acc:HGNC:26221]	79629					-0.218756	0.0707962	0.168393	-0.257694	0.0240125	0.0916787	-0.422238	0.000320809	0.0134318	-0.417077	6.92282e-05	0.00245868	-0.126519	0.0531231	0.182515	-0.142999	0.0227794	0.119198	-0.438955	0.00486237	0.599014	-0.417469	0.00635804	0.491239	-0.589604	0.0392533	0.326336	-0.623914	0.0267874	0.318676
ENSG00000146463	ZMYM4	zinc finger MYM-type containing 4 [Source:HGNC Symbol;Acc:HGNC:13055]	9202	cytoskeleton organization				0.233965	0.0535284	0.144954	0.234636	0.0403621	0.12065	0.42317	0.00032091	0.0134318	0.378155	0.000345366	0.00474281	0.0749428	0.256352	0.356033	0.0787959	0.214094	0.331893	0.37091	0.0195965	0.678723	0.383008	0.0125874	0.563079	0.167048	0.568322	0.67438	0.200793	0.481294	0.672027
ENSG00000142168	SOD1	superoxide dismutase 1 [Source:HGNC Symbol;Acc:HGNC:11179]	6647	oxidation-reduction process; response to ethanol; response to reactive oxygen species; response to drug; glutathione metabolic process			Hepatocytes	-0.242898	0.0459214	0.133571	-0.270945	0.0174753	0.0770826	-0.424979	0.000323694	0.0134318	-0.416445	7.11688e-05	0.00247704	-0.128996	0.0501809	0.17737	-0.143839	0.0219702	0.116271	0.292005	0.057649	0.770375	0.239623	0.122364	0.760236	0.693639	0.0123428	0.246801	0.683639	0.0149625	0.286502
ENSG00000112304	ACOT13	acyl-CoA thioesterase 13 [Source:HGNC Symbol;Acc:HGNC:20999]	55856	protein homotetramerization				-0.297082	0.0151943	0.0746524	-0.301802	0.00787608	0.0495657	-0.429659	0.000324068	0.0134318	-0.388177	0.000232522	0.00392602	-0.139193	0.0363225	0.153985	-0.143504	0.0222903	0.117481	0.259097	0.100865	0.792965	0.200243	0.19758	0.803059	0.418024	0.145559	0.466173	0.33292	0.241837	0.559359
ENSG00000109906	ZBTB16	zinc finger and BTB domain containing 16 [Source:HGNC Symbol;Acc:HGNC:12930]	7704					-0.264921	0.0219708	0.0908143	-0.328918	0.00364963	0.0331461	-0.405027	0.000327218	0.0134655	-0.446491	1.79873e-05	0.00144907	-0.0989206	0.116762	0.256684	-0.130418	0.0382889	0.154436	0.28837	0.0659606	0.770375	0.234994	0.129847	0.770693	0.717294	0.0110604	0.237457	0.663369	0.0183313	0.300432
ENSG00000149782	PLCB3	phospholipase C beta 3 [Source:HGNC Symbol;Acc:HGNC:9056]	5331	intracellular signal transduction; synaptic transmission	lipid catabolic process; small molecule metabolic process			0.319618	0.00640615	0.0481668	0.291748	0.010303	0.0575771	0.412762	0.000331912	0.0135618	0.353572	0.000866218	0.00727812	0.139288	0.029314	0.139224	0.133349	0.034051	0.143981	0.258557	0.100827	0.792965	0.274158	0.076527	0.70013	0.61745	0.029978	0.299139	0.648082	0.021286	0.305717
ENSG00000112242	E2F3	E2F transcription factor 3 [Source:HGNC Symbol;Acc:HGNC:3115]	1871	Notch signaling pathway; positive regulation of cell proliferation				0.335604	0.00357563	0.0363018	0.385741	0.000581139	0.0133789	0.406276	0.000338028	0.013684	0.446106	1.83215e-05	0.00144907	0.170141	0.00649898	0.0713727	0.195124	0.00164992	0.0364837	0.21683	0.173218	0.816199	0.21738	0.161546	0.785315	0.707518	0.0132374	0.24906	0.745028	0.00781226	0.245542
ENSG00000117676	RPS6KA1	ribosomal protein S6 kinase A1 [Source:HGNC Symbol;Acc:HGNC:10430]	6195	signal transduction; intracellular signal transduction; protein phosphorylation; axon guidance; synaptic transmission; toll-like receptor 9 signaling pathway; toll-like receptor 2 signaling pathway; toll-like receptor 5 signaling pathway; toll-like receptor 10 signaling pathway; innate immune response; toll-like receptor TLR1:TLR2 signaling pathway; toll-like receptor TLR6:TLR2 signaling pathway;…			NK-cells | monocytes	0.316882	0.00839431	0.0555039	0.329954	0.00353924	0.032832	0.421594	0.000344943	0.013684	0.414755	7.6613e-05	0.00247704	0.163977	0.0118531	0.0941471	0.176134	0.00471239	0.0563943	0.332409	0.0359227	0.728139	0.285277	0.0651308	0.6834	0.603484	0.0359563	0.317168	0.583699	0.0386078	0.347153
ENSG00000169903	TM4SF4	transmembrane 4 L six family member 4 [Source:HGNC Symbol;Acc:HGNC:11856]	7104			*	Cholangiocytes | Hepatocytes	-0.244369	0.0443623	0.131762	-0.237526	0.0379056	0.116421	-0.422604	0.000346271	0.013684	-0.353562	0.000866519	0.00727812	-0.0981801	0.137478	0.2758	-0.0945854	0.135138	0.270332	0.334269	0.0327274	0.724417	0.310496	0.044335	0.675607	0.38927	0.174149	0.486706	0.332499	0.242438	0.559935
ENSG00000101443	WFDC2	WAP four-disulfide core domain 2 [Source:HGNC Symbol;Acc:HGNC:15939]	10406	spermatogenesis				0.0813894	0.498387	0.444375	0.073281	0.526299	0.445903	0.413753	0.000346397	0.013684	0.35671	0.000773293	0.00685418	0.0608979	0.348564	0.409	0.0572236	0.36788	0.418064	0.373502	0.0183996	0.675133	0.367089	0.0169336	0.574659	1.25694	5.15022e-06	0.0236776	1.26566	2.55589e-06	0.0122106
ENSG00000100284	TOM1	target of myb1 membrane trafficking protein [Source:HGNC Symbol;Acc:HGNC:11982]	10043	endocytosis; endosomal transport; protein transport; intracellular protein transport	protein transport			0.337677	0.00447643	0.0400221	0.30883	0.00649354	0.0451331	0.417773	0.000346779	0.013684	0.359012	0.000711038	0.00659493	0.137206	0.0346061	0.150552	0.128365	0.041512	0.158688	0.27832	0.0783382	0.770375	0.295275	0.0560965	0.682706	0.419	0.145541	0.466173	0.443081	0.118232	0.469916
ENSG00000115216	NRBP1	nuclear receptor binding protein 1 [Source:HGNC Symbol;Acc:HGNC:7993]	29959	protein phosphorylation				0.210043	0.0835858	0.180678	0.222823	0.0518247	0.138873	0.419936	0.000357554	0.0140132	0.383243	0.000282954	0.00427036	0.107579	0.101755	0.241912	0.11217	0.0756698	0.208873	0.205152	0.196206	0.824621	0.210007	0.1764	0.792551	0.220867	0.444914	0.632384	0.189966	0.505313	0.683044
ENSG00000158571	PFKFB1	6-phosphofructo-2-kinase/fructose-2,6-biphosphatase 1 [Source:HGNC Symbol;Acc:HGNC:8872]	5207	small molecule metabolic process; response to glucocorticoid; response to cAMP; response to starvation		*	Hepatocytes	-0.197513	0.101361	0.201621	-0.258689	0.0234577	0.0904469	-0.416309	0.000362284	0.0141027	-0.437315	2.77458e-05	0.00173974	-0.130468	0.0446676	0.168371	-0.156855	0.0122403	0.0865519	0.244301	0.126502	0.798269	0.24949	0.10752	0.739675	0.674085	0.0191376	0.27118	0.644113	0.0221167	0.305717
ENSG00000168306	ACOX2	acyl-CoA oxidase 2 [Source:HGNC Symbol;Acc:HGNC:120]	8309	small molecule metabolic process; fatty acid beta-oxidation using acyl-CoA dehydrogenase; bile acid metabolic process; lipid homeostasis; cellular lipid metabolic process; bile acid biosynthetic process		*	Hepatocytes	-0.344446	0.00344047	0.0356249	-0.379812	0.00071464	0.0149612	-0.412632	0.000372245	0.0143931	-0.433765	3.27052e-05	0.00184548	-0.172914	0.00683634	0.0731472	-0.192185	0.00195533	0.0381846	0.309491	0.0518551	0.76927	0.286592	0.0638792	0.682706	0.661382	0.0215611	0.2765	0.593303	0.0354482	0.340403
ENSG00000198792	TMEM184B	transmembrane protein 184B [Source:HGNC Symbol;Acc:HGNC:1310]	25829					0.285635	0.0180253	0.0813346	0.252443	0.0271274	0.0973874	0.41865	0.000386232	0.014582	0.346623	0.0011092	0.00837555	0.151855	0.0202008	0.117931	0.139241	0.026718	0.129038	0.188323	0.218532	0.831711	0.255737	0.0988749	0.729458	0.534417	0.0529667	0.356008	0.634213	0.0243108	0.311327
ENSG00000167244	IGF2	insulin like growth factor 2 [Source:HGNC Symbol;Acc:HGNC:5466]	3481					-0.313068	0.00865985	0.0560016	-0.342332	0.00243316	0.0273463	-0.414902	0.000386401	0.014582	-0.423783	5.14513e-05	0.00216773	-0.168442	0.00905614	0.0859212	-0.184044	0.0030853	0.0451129	0.261328	0.0994691	0.792965	0.241369	0.119629	0.757504	0.415226	0.150169	0.471092	0.441504	0.119564	0.469916
ENSG00000021461	CYP3A43	cytochrome P450 family 3 subfamily A member 43 [Source:HGNC Symbol;Acc:HGNC:17450]	64816	small molecule metabolic process; oxidation-reduction process; xenobiotic metabolic process	xenobiotic metabolic process; oxidation-reduction process	*	Hepatocytes	-0.458924	7.38841e-05	0.00647658	-0.474999	1.60875e-05	0.00293368	-0.412896	0.00038655	0.014582	-0.423955	5.10574e-05	0.00216773	-0.234142	0.000200977	0.0204913	-0.246381	5.28894e-05	0.00917423	-0.354795	0.0227725	0.684653	-0.300658	0.0516746	0.682706	-0.849697	0.0023822	0.158724	-0.735989	0.00862565	0.249812
ENSG00000105355	PLIN3	perilipin 3 [Source:HGNC Symbol;Acc:HGNC:16893]	10226					0.508502	1.39343e-05	0.00368877	0.449282	4.97938e-05	0.00479191	0.420915	0.000387779	0.014582	0.340146	0.00138989	0.00934457	0.278639	1.04871e-05	0.00561047	0.253431	3.05019e-05	0.00771445	-0.338889	0.0297196	0.71547	-0.319493	0.0384013	0.647868	-0.521356	0.0665584	0.378716	-0.527572	0.0621246	0.39262
ENSG00000120907	ADRA1A	adrenoceptor alpha 1A [Source:HGNC Symbol;Acc:HGNC:277]	148	response to drug		*		-0.282537	0.0165475	0.0783552	-0.342665	0.00240821	0.0272644	-0.408579	0.000389785	0.014582	-0.435988	2.95107e-05	0.00176713	-0.130382	0.0418727	0.163343	-0.158345	0.0114136	0.0839189	-0.292444	0.0661932	0.770375	-0.306515	0.0471937	0.680192	-0.462058	0.110768	0.430666	-0.469044	0.0978989	0.442057
ENSG00000168237	GLYCTK	glycerate kinase [Source:HGNC Symbol;Acc:HGNC:24247]	132158			*	Hepatocytes	-0.304115	0.0108136	0.0633972	-0.352997	0.00174127	0.0231155	-0.414129	0.000393854	0.0146392	-0.440781	2.3589e-05	0.00153769	-0.172907	0.00728525	0.076287	-0.196788	0.00149677	0.0349914	-0.282848	0.0763341	0.770375	-0.298373	0.0535152	0.682706	-0.316441	0.277516	0.550888	-0.366809	0.196847	0.531161
ENSG00000164258	NDUFS4	NADH:ubiquinone oxidoreductase subunit S4 [Source:HGNC Symbol;Acc:HGNC:7711]	4724	small molecule metabolic process; respiratory electron transport chain; cellular metabolic process; mitochondrial electron transport, NADH to ubiquinone; response to cAMP				-0.23394	0.0525374	0.143556	-0.233959	0.0409562	0.121457	-0.413784	0.000418908	0.0154706	-0.369535	0.000480633	0.00549315	-0.111739	0.0877572	0.22712	-0.11274	0.0741709	0.206925	-0.317213	0.0429497	0.754722	-0.313829	0.0420536	0.672789	-0.585454	0.0395669	0.328052	-0.643665	0.0222123	0.305717
ENSG00000104870	FCGRT	Fc gamma receptor and transporter [Source:HGNC Symbol;Acc:HGNC:3621]	2217				Kupffer cells	-0.181119	0.128031	0.226952	-0.222397	0.0522832	0.13924	-0.406051	0.000424402	0.0155737	-0.41135	8.87758e-05	0.00261132	-0.0885853	0.169419	0.299816	-0.107003	0.0904132	0.226701	0.237751	0.137536	0.804454	0.218358	0.159648	0.785315	0.7532	0.0086501	0.231209	0.695613	0.013236	0.274117
ENSG00000135677	GNS	glucosamine (N-acetyl)-6-sulfatase [Source:HGNC Symbol;Acc:HGNC:4422]	2799	glycosaminoglycan metabolic process	glycosaminoglycan metabolic process; carbohydrate metabolic process; small molecule metabolic process		Kupffer cells	0.427826	0.000312487	0.0116381	0.420863	0.000158082	0.00787947	0.417024	0.000428715	0.0156324	0.393909	0.000184412	0.00349201	0.249141	9.45874e-05	0.0164754	0.249204	4.25323e-05	0.00828128	0.401794	0.00848343	0.612163	0.450984	0.0030948	0.457325	0.623058	0.0253749	0.290196	0.65365	0.0201657	0.3026
ENSG00000130508	PXDN	peroxidasin [Source:HGNC Symbol;Acc:HGNC:14966]	7837	extracellular matrix organization			Endothelial cells | Hepatic stellate cells	0.138932	0.246988	0.314389	0.168969	0.142078	0.232258	0.407439	0.000437749	0.0158614	0.403225	0.000125404	0.00295414	0.0515753	0.427958	0.44811	0.069966	0.270386	0.368263	0.241764	0.131302	0.803334	0.227016	0.143559	0.782191	0.706719	0.0140792	0.251853	0.721798	0.010053	0.253076
ENSG00000109193	SULT1E1	sulfotransferase family 1E member 1 [Source:HGNC Symbol;Acc:HGNC:11377]	6783	small molecule metabolic process; xenobiotic metabolic process; steroid metabolic process			Hepatocytes	-0.276132	0.0221911	0.0913051	-0.305515	0.00711627	0.0467421	-0.414277	0.000440641	0.0158664	-0.410088	9.37224e-05	0.00261984	-0.120715	0.0660297	0.200295	-0.137337	0.0289257	0.133537	0.228815	0.153096	0.814915	0.186526	0.230337	0.812385	0.470226	0.105319	0.425477	0.448215	0.113972	0.464274
ENSG00000167363	FN3K	fructosamine 3 kinase [Source:HGNC Symbol;Acc:HGNC:24822]	64122					-0.235576	0.0473821	0.136179	-0.301704	0.00789702	0.0495657	-0.40573	0.000447246	0.0160042	-0.444122	2.01399e-05	0.00146078	-0.124182	0.0535152	0.183274	-0.155051	0.0133111	0.0904038	0.353488	0.0246637	0.687441	0.293313	0.0577836	0.682706	0.700423	0.0139515	0.251853	0.624102	0.0267404	0.318676
ENSG00000248144	ADH1C	alcohol dehydrogenase 1C (class I), gamma polypeptide [Source:HGNC Symbol;Acc:HGNC:251]	126	small molecule metabolic process; xenobiotic metabolic process	xenobiotic metabolic process	*	Hepatocytes	-0.365312	0.00230189	0.0297056	-0.39044	0.000492011	0.0129637	-0.415192	0.000452226	0.0160825	-0.414069	7.89318e-05	0.00250079	-0.169048	0.00965157	0.0878478	-0.184337	0.00303626	0.0448716	0.317802	0.0395548	0.743933	0.269585	0.0816559	0.702638	0.498127	0.0765185	0.39105	0.487389	0.0852691	0.426261
ENSG00000197879	MYO1C	myosin IC [Source:HGNC Symbol;Acc:HGNC:7597]	4641	Fc-gamma receptor signaling pathway involved in phagocytosis; positive regulation of cell migration; membrane organization; innate immune response; mRNA transport; metabolic process				0.266568	0.0283031	0.103903	0.252849	0.0268752	0.0972504	0.415589	0.000455717	0.0161072	0.362331	0.000629305	0.00625632	0.0996131	0.132653	0.271239	0.0976414	0.12282	0.25945	0.439533	0.00547704	0.605959	0.40883	0.00758597	0.509046	0.477771	0.101167	0.421825	0.448851	0.113453	0.464274
ENSG00000253598	SLC10A5	solute carrier family 10 member 5 [Source:HGNC Symbol;Acc:HGNC:22981]	347051	bile acid and bile salt transport				-0.375131	0.00158889	0.0244837	-0.39761	0.000379927	0.0116882	-0.411815	0.000460281	0.0161693	-0.422407	5.47098e-05	0.00216773	-0.189381	0.00333217	0.0528757	-0.206443	0.000835544	0.0287166	0.380714	0.0133169	0.638764	0.337721	0.0283978	0.615781	0.838905	0.00244872	0.161219	0.814874	0.00349024	0.198504
ENSG00000158710	TAGLN2	transgelin 2 [Source:HGNC Symbol;Acc:HGNC:11554]	8407					0.366479	0.00222997	0.0291971	0.385894	0.000578019	0.0133789	0.414565	0.000463527	0.0161847	0.410581	9.17576e-05	0.002612	0.150822	0.0214879	0.120917	0.166473	0.0077062	0.0711791	0.153318	0.328131	0.845772	0.168603	0.278609	0.828115	0.559976	0.0472887	0.344811	0.577211	0.0408733	0.355055
ENSG00000115286	NDUFS7	NADH:ubiquinone oxidoreductase core subunit S7 [Source:HGNC Symbol;Acc:HGNC:7714]	374291	small molecule metabolic process; respiratory electron transport chain; cellular metabolic process; mitochondrial electron transport, NADH to ubiquinone				-0.230487	0.0579061	0.151632	-0.245996	0.0314157	0.105418	-0.413348	0.000467873	0.016238	-0.379338	0.000329819	0.00464068	-0.112164	0.0887031	0.228385	-0.118308	0.0607348	0.189202	0.301239	0.057065	0.770375	0.254629	0.100367	0.729458	0.147079	0.612324	0.68986	0.0714377	0.802394	0.772934
ENSG00000130703	OSBPL2	oxysterol binding protein like 2 [Source:HGNC Symbol;Acc:HGNC:15761]	9885					0.210147	0.0885695	0.186424	0.172781	0.133194	0.225117	0.418534	0.000472792	0.0163085	0.327315	0.00214365	0.0119264	0.100674	0.132289	0.270864	0.0864551	0.172463	0.301324	0.326491	0.0370222	0.732896	0.282546	0.0677935	0.6834	0.815931	0.0036892	0.176159	0.808003	0.00379042	0.200828
ENSG00000137720	C11orf1	chromosome 11 open reading frame 1 [Source:HGNC Symbol;Acc:HGNC:1163]	64776					-0.235697	0.0516843	0.142633	-0.241422	0.0347927	0.111181	-0.411716	0.000475564	0.0163085	-0.38828	0.000231568	0.00392602	-0.139091	0.0334496	0.14885	-0.145382	0.0205485	0.113093	-0.242229	0.119492	0.797116	-0.290157	0.0605844	0.682706	-0.372942	0.187664	0.494327	-0.459025	0.105393	0.452386
ENSG00000162695	SLC30A7	solute carrier family 30 member 7 [Source:HGNC Symbol;Acc:HGNC:19306]	148867					0.271251	0.0249677	0.0967483	0.31364	0.00567545	0.0414859	0.412295	0.000481832	0.0164256	0.425132	4.84352e-05	0.00213356	0.113914	0.0836126	0.222495	0.138473	0.0275902	0.130436	0.360395	0.0206825	0.682754	0.302857	0.0499527	0.682706	0.736673	0.00890804	0.231824	0.680393	0.0154629	0.287023
ENSG00000143412	ANXA9	annexin A9 [Source:HGNC Symbol;Acc:HGNC:547]	8416		synaptic transmission		Hepatocytes | Cholangiocytes	-0.320353	0.00685865	0.049798	-0.338571	0.00273071	0.028402	-0.406043	0.000487564	0.0164536	-0.40109	0.000137127	0.00306081	-0.164158	0.0106217	0.0906906	-0.173503	0.00540248	0.0599142	0.362783	0.0220336	0.684653	0.335998	0.0292377	0.619944	0.479803	0.0977228	0.416957	0.481882	0.0889164	0.430761
ENSG00000205981	DNAJC19	DnaJ heat shock protein family (Hsp40) member C19 [Source:HGNC Symbol;Acc:HGNC:30528]	131118					-0.285689	0.0184154	0.082288	-0.310228	0.00624559	0.0441205	-0.413231	0.000488366	0.0164536	-0.406964	0.000107086	0.00274363	-0.134705	0.0407373	0.16118	-0.149289	0.017295	0.104786	0.509597	0.000685949	0.453152	0.526746	0.000488766	0.309156	0.967226	0.000370493	0.121603	0.921448	0.000882918	0.136646
ENSG00000091073	DTX2	deltex E3 ubiquitin ligase 2 [Source:HGNC Symbol;Acc:HGNC:15973]	113878	Notch signaling pathway; protein ubiquitination				0.283602	0.0189486	0.0837138	0.308364	0.0065781	0.0452782	0.411703	0.000493473	0.016529	0.403933	0.000121728	0.00290217	0.107104	0.10425	0.244769	0.123142	0.0507434	0.173419	0.305145	0.0525115	0.76927	0.285248	0.0651586	0.6834	0.694692	0.0144324	0.251853	0.638505	0.0233378	0.306725
ENSG00000060762	MPC1	mitochondrial pyruvate carrier 1 [Source:HGNC Symbol;Acc:HGNC:21606]	51660	small molecule metabolic process; cellular metabolic process				-0.30955	0.00773	0.0530099	-0.352755	0.00175478	0.0231401	-0.397246	0.000500638	0.0166721	-0.420264	6.01666e-05	0.00229514	-0.167525	0.00771517	0.0786195	-0.187126	0.00260243	0.042079	0.351927	0.0252945	0.688559	0.365291	0.0174978	0.574659	0.621231	0.0297938	0.29907	0.627932	0.0257967	0.316386
ENSG00000184924	PTRHD1	peptidyl-tRNA hydrolase domain containing 1 [Source:HGNC Symbol;Acc:HGNC:33782]	391356					-0.172345	0.161957	0.25335	-0.144924	0.208679	0.281994	-0.414533	0.000511127	0.0169176	-0.336413	0.00157956	0.0100298	-0.0932969	0.161741	0.294176	-0.0837189	0.186591	0.312081	0.360949	0.016976	0.665926	0.37732	0.0140135	0.563079	0.581716	0.0347416	0.313084	0.585135	0.0381212	0.346789
ENSG00000174886	NDUFA11	NADH:ubiquinone oxidoreductase subunit A11 [Source:HGNC Symbol;Acc:HGNC:20371]	126328	small molecule metabolic process; respiratory electron transport chain; cellular metabolic process				-0.12795	0.291986	0.340769	-0.186523	0.104649	0.198349	-0.406959	0.000519764	0.0169176	-0.425365	4.79295e-05	0.00213356	-0.0634818	0.334142	0.401906	-0.0916457	0.147852	0.280889	0.250153	0.118768	0.797116	0.228781	0.140436	0.779923	0.563641	0.0520026	0.354188	0.561776	0.0467106	0.368853
ENSG00000173141	MRPL57	mitochondrial ribosomal protein L57 [Source:HGNC Symbol;Acc:HGNC:14514]	78988					-0.173673	0.154611	0.248456	-0.188077	0.101747	0.195828	-0.409943	0.000520819	0.0169176	-0.38554	0.000258343	0.00412955	-0.0927715	0.159991	0.293127	-0.10187	0.107223	0.244621	0.200153	0.207823	0.826434	0.184384	0.235775	0.81583	0.153832	0.595311	0.683944	0.159481	0.576127	0.706921
ENSG00000036672	USP2	ubiquitin specific peptidase 2 [Source:HGNC Symbol;Acc:HGNC:12618]	9099					-0.248108	0.029861	0.107162	-0.312135	0.00592094	0.0426505	-0.386541	0.000524959	0.0169176	-0.444225	2.00417e-05	0.00146078	-0.113128	0.0682878	0.20278	-0.151831	0.0154257	0.0979869	0.39832	0.0110822	0.63842	0.411253	0.00722199	0.507628	0.110824	0.702242	0.716328	0.156754	0.582679	0.710096
ENSG00000108375	RNF43	ring finger protein 43 [Source:HGNC Symbol;Acc:HGNC:18505]	54894					-0.317908	0.00625232	0.0474158	-0.391266	0.000477703	0.0129637	-0.396365	0.00052757	0.0169176	-0.452929	1.31749e-05	0.00133035	-0.189121	0.00252578	0.0471761	-0.223964	0.000267476	0.0180959	0.281036	0.0761589	0.770375	0.269134	0.0821761	0.702638	0.496516	0.0845896	0.403416	0.497981	0.0785893	0.419122
ENSG00000162365	CYP4A22	cytochrome P450 family 4 subfamily A member 22 [Source:HGNC Symbol;Acc:HGNC:20575]	284541	oxidation-reduction process		*	Hepatocytes	-0.26386	0.0269605	0.10138	-0.310265	0.0062392	0.0441205	-0.403651	0.000528001	0.0169176	-0.413723	8.0126e-05	0.00250079	-0.147819	0.0218618	0.12165	-0.16702	0.00750029	0.0704708	0.488848	0.00162457	0.567235	0.451189	0.00308062	0.457325	0.869997	0.0020342	0.149633	0.783867	0.00503596	0.221624
ENSG00000185619	PCGF3	polycomb group ring finger 3 [Source:HGNC Symbol;Acc:HGNC:10066]	10336					0.173111	0.161491	0.253154	0.184162	0.109179	0.203109	0.414721	0.000531963	0.0169176	0.36549	0.000559575	0.00590509	0.079523	0.235295	0.341403	0.0846924	0.181471	0.307485	0.202526	0.208592	0.826434	0.1964	0.206399	0.804834	0.320506	0.273641	0.548733	0.293571	0.302443	0.593956
ENSG00000136881	BAAT	bile acid-CoA:amino acid N-acyltransferase [Source:HGNC Symbol;Acc:HGNC:932]	570	small molecule metabolic process; bile acid and bile salt transport; bile acid metabolic process; fatty acid metabolic process; bile acid biosynthetic process		*	Hepatocytes | Cholangiocytes	-0.354577	0.00256281	0.0312759	-0.388753	0.000522463	0.0131668	-0.402273	0.000534226	0.0169176	-0.408314	0.000101108	0.0026547	-0.176519	0.00571889	0.0672191	-0.19211	0.00196368	0.0381846	0.248326	0.121188	0.797116	0.25307	0.102497	0.732224	0.848739	0.00297166	0.167478	0.812753	0.00358055	0.198792
ENSG00000213853	EMP2	epithelial membrane protein 2 [Source:HGNC Symbol;Acc:HGNC:3334]	2013					-0.23251	0.0444887	0.131762	-0.23881	0.0368549	0.114744	-0.390269	0.000534438	0.0169176	-0.357559	0.00074978	0.00671031	-0.0884994	0.15992	0.293086	-0.0904199	0.153411	0.284752	0.111177	0.483341	0.869048	0.0986037	0.527195	0.867256	0.315695	0.272041	0.547759	0.322164	0.257498	0.568657
ENSG00000128917	DLL4	delta like canonical Notch ligand 4 [Source:HGNC Symbol;Acc:HGNC:2910]	54567	signal transduction; negative regulation of cell proliferation; T cell differentiation; Notch signaling pathway; negative regulation of gene expression			Endothelial cells | Hepatic stellate cells	0.128228	0.288028	0.337821	0.152024	0.187044	0.269917	0.403016	0.000547394	0.0171573	0.378224	0.000344429	0.0047426	0.098568	0.129909	0.26856	0.108791	0.0850749	0.220122	0.267922	0.0931327	0.779653	0.257577	0.0964348	0.722803	0.521882	0.0713174	0.384379	0.504551	0.0746606	0.414373
ENSG00000186635	ARAP1	ArfGAP with RhoGAP domain, ankyrin repeat and PH domain 1 [Source:HGNC Symbol;Acc:HGNC:16925]	116985	regulation of cell shape; positive regulation of filopodium assembly; positive regulation of GTPase activity; small GTPase mediated signal transduction; regulation of small GTPase mediated signal transduction				0.372971	0.00205866	0.0282226	0.339947	0.00261822	0.0277916	0.413477	0.000554006	0.0171573	0.355067	0.000820748	0.00703271	0.199926	0.00227764	0.0450108	0.190166	0.00219376	0.0397671	0.306447	0.0502739	0.76927	0.300846	0.051526	0.682706	0.341093	0.233347	0.526995	0.343892	0.226553	0.55137
ENSG00000172465	TCEAL1	transcription elongation factor A like 1 [Source:HGNC Symbol;Acc:HGNC:11616]	9338		negative regulation of transcription from RNA polymerase II promoter			-0.378071	0.00179489	0.0261939	-0.35478	0.00164482	0.0225167	-0.413835	0.000556574	0.0171573	-0.364401	0.000582779	0.00598949	-0.164166	0.013122	0.0982814	-0.161149	0.00998854	0.0799206	-0.239055	0.135103	0.803334	-0.204793	0.187492	0.799509	-0.695771	0.0155252	0.255827	-0.650676	0.0207575	0.304738
ENSG00000071127	WDR1	WD repeat domain 1 [Source:HGNC Symbol;Acc:HGNC:12754]	9948	blood coagulation; platelet activation; platelet degranulation				0.261572	0.0298299	0.107162	0.294275	0.0096383	0.055427	0.405593	0.000558853	0.0171573	0.40911	9.77278e-05	0.00262523	0.140836	0.0306609	0.14307	0.156567	0.012406	0.0869747	0.414906	0.00781325	0.605959	0.41732	0.00637772	0.491239	0.570278	0.0459369	0.344307	0.532617	0.0596197	0.387258
ENSG00000160868	CYP3A4	cytochrome P450 family 3 subfamily A member 4 [Source:HGNC Symbol;Acc:HGNC:2637]	1576	small molecule metabolic process; oxidation-reduction process; xenobiotic metabolic process; drug metabolic process; exogenous drug catabolic process; steroid metabolic process; androgen metabolic process	xenobiotic metabolic process; oxidation-reduction process	*	Hepatocytes	-0.360722	0.00199166	0.0276906	-0.421265	0.000155621	0.00787947	-0.398436	0.000558921	0.0171573	-0.449139	1.58373e-05	0.00138235	-0.171315	0.00701439	0.0744144	-0.203054	0.00102893	0.0302336	-0.424059	0.00572076	0.605959	-0.46151	0.00243945	0.457325	-0.669612	0.016846	0.263378	-0.737445	0.00848976	0.249812
ENSG00000138448	ITGAV	integrin subunit alpha V [Source:HGNC Symbol;Acc:HGNC:6150]	3685	blood coagulation; extracellular matrix organization; cell adhesion; endodermal cell differentiation; cell migration; positive regulation of cell migration; leukocyte migration; positive regulation of cell adhesion; axon guidance; calcium ion transmembrane transport; positive regulation of cell proliferation; vascular endothelial growth factor receptor signaling pathway	positive regulation of cell adhesion; extrinsic apoptotic signaling pathway in absence of ligand; cell migration; blood coagulation; antigen processing and presentation of exogenous peptide antigen via MHC class I			0.323302	0.00562357	0.0447149	0.335049	0.00303859	0.0302831	0.396209	0.000566203	0.0171573	0.397925	0.000156378	0.00331403	0.110636	0.0839462	0.222958	0.123807	0.0494814	0.171917	0.0909909	0.569717	0.877184	0.10617	0.495914	0.860696	0.473685	0.100834	0.421825	0.430053	0.129592	0.480015
ENSG00000089876	DHX32	DEAH-box helicase 32 (putative) [Source:HGNC Symbol;Acc:HGNC:16717]	55760					0.366063	0.00231931	0.0298716	0.376247	0.000807826	0.0161789	0.409616	0.000567156	0.0171573	0.394939	0.000176811	0.00343599	0.164828	0.0119434	0.0944602	0.173984	0.00527022	0.0594078	0.319762	0.0448881	0.756922	0.282316	0.0680217	0.68369	0.408139	0.161023	0.480163	0.346449	0.22309	0.549847
ENSG00000122641	INHBA	inhibin subunit beta A [Source:HGNC Symbol;Acc:HGNC:6066]	3624	endodermal cell differentiation; negative regulation of cell proliferation; cell cycle arrest; response to drug; hematopoietic progenitor cell differentiation; negative regulation of cell growth			Smooth muscle cells	0.0351666	0.769083	0.544379	0.0877034	0.448009	0.41322	0.397706	0.000568617	0.0171573	0.411166	8.94781e-05	0.00261132	-0.0299894	0.64345	0.5343	-0.000486774	0.993902	0.626052	0.395804	0.00821448	0.610017	0.394015	0.0101829	0.563079	0.675179	0.0132455	0.24906	0.735744	0.00864866	0.249812
ENSG00000168309	FAM107A	family with sequence similarity 107 member A [Source:HGNC Symbol;Acc:HGNC:30827]	11170				Hepatic stellate cells | Endothelial cells	-0.199319	0.0951455	0.19479	-0.14663	0.203325	0.279204	-0.399586	0.000568849	0.0171573	-0.295911	0.0057504	0.0199954	-0.0677047	0.297108	0.380066	-0.0459758	0.469748	0.464585	0.288558	0.0722687	0.770375	0.251636	0.104487	0.73422	0.717938	0.0130131	0.248768	0.66934	0.0172769	0.294781
ENSG00000197114	ZGPAT	zinc finger CCCH-type and G-patch domain containing [Source:HGNC Symbol;Acc:HGNC:15948]	84619				Plasma cells	-0.293434	0.0157552	0.0762616	-0.320082	0.00472367	0.0379295	-0.409962	0.00057179	0.0171573	-0.405177	0.000115508	0.00283258	-0.157551	0.0166006	0.107837	-0.172195	0.00577817	0.0620748	0.22658	0.159767	0.814915	0.194738	0.210297	0.804938	0.444096	0.128782	0.449177	0.418581	0.140269	0.492375
ENSG00000189221	MAOA	monoamine oxidase A [Source:HGNC Symbol;Acc:HGNC:6833]	4128	small molecule metabolic process; oxidation-reduction process; xenobiotic metabolic process				-0.16675	0.17154	0.261623	-0.209736	0.0675197	0.159152	-0.406441	0.00057898	0.017283	-0.40799	0.000102514	0.00266629	-0.0888698	0.178121	0.304657	-0.108913	0.0847184	0.219947	0.514466	0.000891154	0.453152	0.534926	0.000392834	0.309156	0.652657	0.0223887	0.277505	0.65906	0.0191259	0.301011
ENSG00000222033	LINC01124	long intergenic non-protein coding RNA 1124 [Source:HGNC Symbol;Acc:HGNC:49270]	440925					-0.145928	0.218557	0.295744	-0.192006	0.0946929	0.188126	-0.393396	0.00060897	0.0180767	-0.415985	7.26144e-05	0.00247704	-0.0725353	0.258664	0.357655	-0.100111	0.113511	0.250298	0.405756	0.00974747	0.63842	0.395296	0.00993095	0.562223	0.793932	0.00520557	0.209953	0.820145	0.00327462	0.192625
ENSG00000170293	CMTM8	CKLF like MARVEL transmembrane domain containing 8 [Source:HGNC Symbol;Acc:HGNC:19179]	152189					-0.164819	0.177062	0.266203	-0.182565	0.112331	0.206342	-0.405124	0.000613587	0.0180767	-0.372265	0.000433281	0.00521171	-0.0524865	0.428494	0.44849	-0.0622864	0.32683	0.39789	0.235517	0.142975	0.806994	0.218687	0.159014	0.785315	0.683905	0.0180021	0.26771	0.651961	0.0205	0.303103
ENSG00000237988	OR2I1P	olfactory receptor family 2 subfamily I member 1 pseudogene [Source:HGNC Symbol;Acc:HGNC:8258]	442197				granulocytes | monocytes	0.271506	0.0270679	0.10138	0.242045	0.0343159	0.110718	0.411015	0.000614984	0.0180767	0.336712	0.00156353	0.00997743	0.102444	0.125903	0.265772	0.0936335	0.139161	0.272846	0.366504	0.0209446	0.684653	0.374523	0.0147648	0.574659	0.518324	0.07386	0.387501	0.546583	0.0531137	0.377974
ENSG00000104883	PEX11G	peroxisomal biogenesis factor 11 gamma [Source:HGNC Symbol;Acc:HGNC:20208]	92960					-0.296666	0.0130551	0.0697078	-0.343736	0.00232975	0.026818	-0.40047	0.000634208	0.0185472	-0.421115	5.79414e-05	0.00224178	-0.163704	0.0112956	0.0919592	-0.185563	0.00283816	0.0437827	0.292694	0.0615995	0.770375	0.250231	0.106465	0.73849	0.320159	0.26322	0.544433	0.298906	0.293689	0.588872
ENSG00000149124	GLYAT	glycine-N-acyltransferase [Source:HGNC Symbol;Acc:HGNC:13734]	10249	small molecule metabolic process; xenobiotic metabolic process; response to toxic substance	xenobiotic metabolic process	*	Hepatocytes	-0.373592	0.00168322	0.0252062	-0.392655	0.000454513	0.0127613	-0.401853	0.00065268	0.0186564	-0.39499	0.000176437	0.00343599	-0.185394	0.00413534	0.0589268	-0.195152	0.00164724	0.0364837	0.223788	0.153733	0.814915	0.211813	0.172671	0.788364	0.691997	0.014013	0.251853	0.664798	0.0180739	0.298777
ENSG00000111642	CHD4	chromodomain helicase DNA binding protein 4 [Source:HGNC Symbol;Acc:HGNC:1919]	1108	chromatin organization				0.407453	0.000561503	0.0151166	0.37524	0.000836085	0.0164024	0.401329	0.000653404	0.0186564	0.333775	0.0017274	0.0105399	0.201939	0.00167857	0.0401103	0.187241	0.00258571	0.0419041	-0.225355	0.149278	0.814915	-0.285864	0.0645693	0.682706	-0.350399	0.217616	0.517308	-0.427105	0.132275	0.483682
ENSG00000095637	SORBS1	sorbin and SH3 domain containing 1 [Source:HGNC Symbol;Acc:HGNC:14565]	10580					-0.0769919	0.499709	0.444882	-0.189341	0.099434	0.193333	-0.3751	0.000656804	0.0186564	-0.463155	7.93445e-06	0.00109555	-0.0511273	0.407144	0.438958	-0.10225	0.105899	0.243574	0.322377	0.0432255	0.754722	0.28136	0.0689775	0.68585	0.807158	0.00483286	0.200168	0.741792	0.00809534	0.246923
ENSG00000153902	LGI4	leucine rich repeat LGI family member 4 [Source:HGNC Symbol;Acc:HGNC:18712]	163175				Smooth muscle cells	-0.378081	0.00110287	0.020807	-0.359255	0.00142357	0.0211122	-0.392045	0.000659709	0.0186564	-0.367053	0.000527766	0.00575442	-0.186262	0.00312653	0.0517555	-0.183566	0.00316711	0.0457083	0.467979	0.00299442	0.579102	0.43309	0.00457747	0.457325	0.524762	0.0711536	0.384172	0.499075	0.0779236	0.41805
ENSG00000110077	MS4A6A	membrane spanning 4-domains A6A [Source:HGNC Symbol;Acc:HGNC:13375]	64231				Kupffer cells | Macrophages | Hepatic stellate cells | monocytes	-0.288019	0.0123481	0.0677542	-0.204635	0.0745956	0.166634	-0.38468	0.000660112	0.0186564	-0.246261	0.0224084	0.043431	-0.109642	0.0810938	0.219403	-0.0707495	0.265022	0.364649	0.204569	0.194359	0.824621	0.193426	0.213412	0.804938	0.539659	0.057997	0.363699	0.561217	0.0469341	0.369628
ENSG00000051382	PIK3CB	phosphatidylinositol-4,5-bisphosphate 3-kinase catalytic subunit beta [Source:HGNC Symbol;Acc:HGNC:8976]	5291	blood coagulation; Fc-gamma receptor signaling pathway involved in phagocytosis; signal transduction; platelet activation; phosphatidylinositol biosynthetic process; protein phosphorylation; phosphatidylinositol phosphorylation; cell migration; T cell receptor signaling pathway; leukocyte migration; phospholipid metabolic process; platelet aggregation; chemotaxis; transmembrane receptor protein t…	innate immune response; protein phosphorylation; cell migration; blood coagulation; Fc-gamma receptor signaling pathway involved in phagocytosis; phospholipid metabolic process; inflammatory response; small molecule metabolic process			0.354875	0.00362809	0.0366274	0.336954	0.00286845	0.0292742	0.410155	0.000661715	0.0186564	0.356774	0.000771503	0.00685011	0.174209	0.00859936	0.0833218	0.171702	0.00592547	0.0624607	0.277968	0.0780913	0.770375	0.289466	0.0612118	0.682706	0.861153	0.00221618	0.15207	0.859421	0.00200864	0.159329
ENSG00000090686	USP48	ubiquitin specific peptidase 48 [Source:HGNC Symbol;Acc:HGNC:18533]	84196	proteasome-mediated ubiquitin-dependent protein catabolic process				0.249348	0.0384593	0.121588	0.247694	0.0302342	0.103329	0.400003	0.00066683	0.0186564	0.365955	0.000549945	0.00585143	0.149159	0.0217401	0.121189	0.149748	0.0169437	0.103988	0.108963	0.488779	0.869318	0.121588	0.435317	0.850091	0.408638	0.150944	0.472051	0.488878	0.0843034	0.423944
ENSG00000006468	ETV1	ETS variant transcription factor 1 [Source:HGNC Symbol;Acc:HGNC:3490]	2115					-0.174353	0.155912	0.249131	-0.213116	0.0631386	0.153464	-0.405315	0.000668409	0.0186564	-0.396679	0.000164623	0.00337132	-0.105767	0.111099	0.251089	-0.124442	0.0482998	0.169533	0.250644	0.11653	0.797116	0.260169	0.093079	0.719341	0.619214	0.0316754	0.301501	0.62786	0.0258144	0.316386
ENSG00000168256	NKIRAS2	NFKB inhibitor interacting Ras like 2 [Source:HGNC Symbol;Acc:HGNC:17898]	28511	small GTPase mediated signal transduction				0.304273	0.0127311	0.0686504	0.28343	0.0127826	0.0643271	0.407381	0.000675664	0.0186564	0.341548	0.00132416	0.00917286	0.121143	0.0690426	0.20391	0.11469	0.0692152	0.200464	0.326975	0.0408963	0.743933	0.287105	0.0633961	0.682706	0.750498	0.0092269	0.233757	0.709093	0.0115022	0.259295
ENSG00000123179	EBPL	EBP like [Source:HGNC Symbol;Acc:HGNC:18061]	84650				Hepatocytes	-0.223307	0.0639181	0.159862	-0.254791	0.0256946	0.0953976	-0.398848	0.00067591	0.0186564	-0.393905	0.000184441	0.00349201	-0.0957039	0.143696	0.281504	-0.112123	0.0757945	0.208873	0.542008	0.000482696	0.453152	0.541251	0.000330885	0.309156	0.563501	0.0509658	0.352114	0.571799	0.0428467	0.360064
ENSG00000140416	TPM1	tropomyosin 1 [Source:HGNC Symbol;Acc:HGNC:12010]	7168	positive regulation of cell adhesion; cytoskeleton organization; movement of cell or subcellular component	positive regulation of cell adhesion; ruffle organization			0.360272	0.00238403	0.030223	0.3856	0.000584032	0.0133789	0.39892	0.000676601	0.0186564	0.412785	8.34454e-05	0.00252804	0.126633	0.0519889	0.180356	0.146486	0.0195799	0.110499	0.206474	0.197071	0.824621	0.219242	0.157945	0.784872	-0.0235202	0.935807	0.770483	0.0141796	0.960391	0.805212
ENSG00000121039	RDH10	retinol dehydrogenase 10 [Source:HGNC Symbol;Acc:HGNC:19975]	157506					0.333337	0.00453987	0.0402902	0.361892	0.00130624	0.0201597	0.393695	0.000678205	0.0186564	0.410441	9.23117e-05	0.002612	0.136821	0.0330311	0.148612	0.15518	0.013232	0.0901152	0.386902	0.0148038	0.641338	0.350307	0.0228617	0.594937	0.729846	0.0112329	0.237457	0.676088	0.0161488	0.290104
ENSG00000100577	GSTZ1	glutathione S-transferase zeta 1 [Source:HGNC Symbol;Acc:HGNC:4643]	2954	small molecule metabolic process; oxidation-reduction process; cellular nitrogen compound metabolic process; xenobiotic metabolic process; L-phenylalanine catabolic process; glutathione metabolic process			Hepatocytes	-0.16791	0.170608	0.260479	-0.198521	0.0838488	0.176441	-0.403495	0.000680851	0.0186564	-0.383415	0.000281035	0.00425665	-0.119795	0.0696626	0.205022	-0.130553	0.038084	0.153946	0.406689	0.0102883	0.63842	0.40129	0.0088237	0.533526	0.903747	0.00151854	0.141781	0.902451	0.00114328	0.136646
ENSG00000147576	ADHFE1	alcohol dehydrogenase iron containing 1 [Source:HGNC Symbol;Acc:HGNC:16354]	137872	small molecule metabolic process; oxidation-reduction process; cellular metabolic process				-0.278838	0.0194799	0.0850678	-0.324738	0.00412703	0.0354822	-0.396737	0.00068739	0.0186564	-0.422978	5.33339e-05	0.00216773	-0.13497	0.0372136	0.155162	-0.159783	0.0106619	0.0816162	0.29437	0.0636409	0.770375	0.329669	0.0325054	0.638058	0.503015	0.0812663	0.399374	0.54301	0.0547199	0.380372
ENSG00000118298	CA14	carbonic anhydrase 14 [Source:HGNC Symbol;Acc:HGNC:1372]	23632	small molecule metabolic process				-0.442147	0.000115409	0.00787371	-0.396837	0.00039077	0.0117734	-0.391168	0.000692108	0.0186564	-0.341546	0.00132428	0.00917286	-0.231606	0.000197377	0.0204913	-0.21685	0.000430314	0.0205799	0.273214	0.0871651	0.775245	0.244493	0.114852	0.75101	0.430977	0.138097	0.459268	0.384422	0.176003	0.520915
ENSG00000144228	SPOPL	speckle type BTB/POZ protein like [Source:HGNC Symbol;Acc:HGNC:27934]	339745	protein ubiquitination; proteasome-mediated ubiquitin-dependent protein catabolic process				0.190827	0.105683	0.205439	0.250875	0.0281216	0.0992724	0.388708	0.000692154	0.0186564	0.429849	3.91315e-05	0.00201518	0.121232	0.0567574	0.186204	0.149067	0.0174676	0.105452	-0.295091	0.0614561	0.770375	-0.323222	0.0361444	0.647868	-0.224695	0.436679	0.62929	-0.279785	0.325843	0.607403
ENSG00000144395	CCDC150	coiled-coil domain containing 150 [Source:HGNC Symbol;Acc:HGNC:26834]	284992					-0.214559	0.0828319	0.179968	-0.210956	0.0659113	0.157055	-0.407887	0.000697589	0.0186564	-0.351884	0.000920312	0.0075578	-0.120301	0.072089	0.206884	-0.121142	0.0546993	0.179719	0.286166	0.071975	0.770375	0.233736	0.131941	0.770693	0.732291	0.0104795	0.235137	0.662074	0.0185671	0.300502
ENSG00000178449	COX14	cytochrome c oxidase assembly factor COX14 [Source:HGNC Symbol;Acc:HGNC:28216]	84987					-0.115031	0.339797	0.367771	-0.177879	0.121983	0.214924	-0.394836	0.00070101	0.0186564	-0.42332	5.25265e-05	0.00216773	-0.0400449	0.539721	0.494473	-0.0717626	0.258193	0.362229	0.149193	0.357506	0.850281	0.137205	0.378465	0.843033	0.366647	0.212091	0.513442	0.349137	0.219492	0.547574
ENSG00000104774	MAN2B1	mannosidase alpha class 2B member 1 [Source:HGNC Symbol;Acc:HGNC:6826]	4125				Plasma cells | Macrophages	0.240726	0.0446217	0.131929	0.221711	0.0530288	0.140435	0.396205	0.000702346	0.0186564	0.34397	0.00121725	0.00884141	0.095989	0.140978	0.279825	0.0908596	0.151399	0.283292	0.353032	0.0219648	0.684653	0.274134	0.0765532	0.70013	0.599283	0.0325465	0.304263	0.483371	0.0879179	0.430431
ENSG00000161267	BDH1	3-hydroxybutyrate dehydrogenase 1 [Source:HGNC Symbol;Acc:HGNC:1027]	622	small molecule metabolic process; oxidation-reduction process; cellular lipid metabolic process	oxidation-reduction process	*	Hepatocytes	-0.331903	0.0054853	0.044149	-0.365175	0.0011724	0.0195765	-0.399145	0.000702707	0.0186564	-0.408352	0.000100942	0.0026547	-0.175564	0.00668316	0.0722305	-0.191854	0.00199271	0.0385693	0.430412	0.0066445	0.605959	0.420874	0.00592469	0.487795	0.878379	0.00215456	0.15207	0.892319	0.00130904	0.143307
ENSG00000182902	SLC25A18	solute carrier family 25 member 18 [Source:HGNC Symbol;Acc:HGNC:10988]	83733				Hepatocytes	-0.322104	0.00784454	0.053447	-0.323771	0.00424509	0.0358741	-0.403618	0.000708583	0.0186799	-0.359758	0.000691855	0.00650162	-0.164826	0.0121069	0.0948366	-0.165623	0.00803635	0.0729519	0.371707	0.0154078	0.652746	0.379675	0.0134068	0.563079	0.66579	0.0169093	0.263378	0.692684	0.0136416	0.278227
ENSG00000018510	AGPS	alkylglycerone phosphate synthase [Source:HGNC Symbol;Acc:HGNC:327]	8540		small molecule metabolic process			0.346082	0.004163	0.0382656	0.31642	0.00524561	0.0399323	0.403439	0.000713692	0.0186799	0.336211	0.00159042	0.01007	0.171723	0.00884865	0.0848092	0.159084	0.0110216	0.0826818	0.329769	0.0389661	0.743933	0.285741	0.0646867	0.682706	0.767473	0.00764065	0.222721	0.728923	0.00931232	0.253076
ENSG00000128309	MPST	mercaptopyruvate sulfurtransferase [Source:HGNC Symbol;Acc:HGNC:7223]	4357	response to toxic substance			Hepatocytes	-0.251912	0.0349798	0.115549	-0.303128	0.00759698	0.0487358	-0.394677	0.000718019	0.0186799	-0.417789	6.7099e-05	0.00242013	-0.130965	0.0429657	0.165154	-0.154652	0.013559	0.0915824	0.308634	0.0520903	0.76927	0.268354	0.0830832	0.702638	0.583784	0.0428411	0.336968	0.552543	0.0505207	0.374262
ENSG00000124370	MCEE	methylmalonyl-CoA epimerase [Source:HGNC Symbol;Acc:HGNC:16732]	84693	small molecule metabolic process; fatty acid beta-oxidation; cellular lipid metabolic process				-0.46582	6.76643e-05	0.00647658	-0.458632	3.33375e-05	0.00426098	-0.398778	0.000718734	0.0186799	-0.372463	0.000430029	0.00521171	-0.199816	0.00190731	0.041847	-0.200144	0.00122649	0.032606	-0.389196	0.014174	0.638764	-0.389468	0.0111225	0.563079	-0.536067	0.0647633	0.375475	-0.554898	0.0495252	0.374067
ENSG00000105928	GSDME	gasdermin E [Source:HGNC Symbol;Acc:HGNC:2810]	1687					0.178779	0.142636	0.239191	0.22968	0.044883	0.12794	0.400164	0.000719805	0.0186799	0.413161	8.20974e-05	0.00252804	0.0830943	0.208632	0.324494	0.109045	0.0843369	0.219497	-0.313506	0.045706	0.760854	-0.357253	0.0202218	0.584041	-0.421838	0.140757	0.460911	-0.491752	0.0824647	0.421773
ENSG00000116882	HAO2	hydroxyacid oxidase 2 [Source:HGNC Symbol;Acc:HGNC:4810]	51179			*	Hepatocytes	-0.332699	0.00448937	0.0400367	-0.352313	0.00177963	0.0233121	-0.390472	0.000725521	0.0187438	-0.378419	0.000341837	0.0047322	-0.163238	0.0102884	0.0894676	-0.170498	0.00629967	0.0643845	0.478229	0.00252701	0.579102	0.447063	0.00337667	0.457325	0.791756	0.00612149	0.217894	0.752446	0.00719606	0.243153
ENSG00000166228	PCBD1	pterin-4 alpha-carbinolamine dehydratase 1 [Source:HGNC Symbol;Acc:HGNC:8646]	5092	small molecule metabolic process; oxidation-reduction process; cellular nitrogen compound metabolic process; L-phenylalanine catabolic process; protein homotetramerization			Hepatocytes	-0.276217	0.0223202	0.0915446	-0.310963	0.00611864	0.043666	-0.399592	0.000733599	0.0187967	-0.406574	0.000108875	0.00277565	-0.146397	0.0252985	0.129162	-0.164053	0.00867946	0.0751876	0.35111	0.0229824	0.684653	0.316605	0.0402293	0.665476	0.775277	0.00534948	0.210203	0.770652	0.00586205	0.232548
ENSG00000162636	FAM102B	family with sequence similarity 102 member B [Source:HGNC Symbol;Acc:HGNC:27637]	284611					0.0790861	0.484509	0.43978	0.109772	0.341854	0.362949	0.368868	0.000735668	0.0187967	0.377482	0.0003545	0.00478957	0.0413322	0.499561	0.478247	0.0598757	0.345997	0.407184	0.347328	0.026593	0.688708	0.340012	0.0273133	0.615289	0.622544	0.0286677	0.298169	0.620973	0.0275328	0.322979
ENSG00000065057	NTHL1	nth like DNA glycosylase 1 [Source:HGNC Symbol;Acc:HGNC:8028]	4913				Hepatocytes	-0.248152	0.0324848	0.111772	-0.324482	0.00415796	0.0355395	-0.38273	0.000737356	0.0187967	-0.452982	1.3141e-05	0.00133035	-0.112496	0.0743207	0.209986	-0.1522	0.0151699	0.097278	0.389087	0.0128109	0.63842	0.333443	0.0305216	0.625147	0.471637	0.0999296	0.421412	0.435974	0.124329	0.473408
ENSG00000175137	SH3BP5L	SH3 binding domain protein 5 like [Source:HGNC Symbol;Acc:HGNC:29360]	80851	intracellular signal transduction				0.222351	0.0656521	0.161446	0.241769	0.0345267	0.110986	0.396562	0.000749125	0.0189894	0.385487	0.000258883	0.00412955	0.14856	0.0223155	0.122563	0.15616	0.012644	0.0880587	0.33288	0.0371741	0.732896	0.312388	0.0430278	0.675607	0.612725	0.0345902	0.312427	0.603618	0.0322989	0.333895
ENSG00000179636	TPPP2	tubulin polymerization promoting protein family member 2 [Source:HGNC Symbol;Acc:HGNC:19293]	122664					-0.235589	0.0519406	0.142991	-0.267373	0.0190655	0.0807528	-0.398286	0.000751506	0.0189894	-0.392885	0.000192265	0.00359387	-0.135355	0.0387552	0.158175	-0.149396	0.0172125	0.104556	0.383257	0.0118412	0.63842	0.391135	0.0107694	0.563079	0.578757	0.0374089	0.320268	0.596348	0.0344928	0.337331
ENSG00000213398	LCAT	lecithin-cholesterol acyltransferase [Source:HGNC Symbol;Acc:HGNC:6522]	3931	small molecule metabolic process; response to glucocorticoid; high-density lipoprotein particle remodeling; lipoprotein metabolic process; cholesterol homeostasis			Hepatocytes	-0.309594	0.00972842	0.059412	-0.336415	0.00291565	0.0295817	-0.39637	0.000760606	0.0190907	-0.395793	0.000170724	0.00339521	-0.156265	0.0161422	0.107088	-0.169465	0.00663701	0.0660954	0.408753	0.00888129	0.61284	0.342997	0.0259527	0.608675	0.79412	0.00498865	0.204847	0.7548	0.00700974	0.243153
ENSG00000086062	B4GALT1	beta-1,4-galactosyltransferase 1 [Source:HGNC Symbol;Acc:HGNC:924]	2683	extracellular matrix organization; cell adhesion; leukocyte migration; negative regulation of cell proliferation; Notch signaling pathway; glycosaminoglycan metabolic process	glycosaminoglycan metabolic process; carbohydrate metabolic process; small molecule metabolic process			0.34764	0.00411464	0.0381135	0.312551	0.00585219	0.0422431	0.402733	0.000762143	0.0190907	0.340072	0.00139343	0.00934457	0.135406	0.041159	0.162021	0.127602	0.0427669	0.159924	0.374223	0.0171353	0.665926	0.40913	0.00754005	0.509046	0.535364	0.0619823	0.3695	0.54067	0.0557932	0.380687
ENSG00000010379	SLC6A13	solute carrier family 6 member 13 [Source:HGNC Symbol;Acc:HGNC:11046]	6540			*		-0.305105	0.0107717	0.063361	-0.353701	0.0017026	0.0228666	-0.39549	0.000769154	0.0191829	-0.414992	7.58276e-05	0.00247704	-0.138431	0.0334699	0.14885	-0.164943	0.00830976	0.0736836	0.294473	0.0640646	0.770375	0.324036	0.0356673	0.646905	0.24816	0.393765	0.606831	0.263079	0.355709	0.622123
ENSG00000164967	RPP25L	ribonuclease P/MRP subunit p25 like [Source:HGNC Symbol;Acc:HGNC:19909]	138716					-0.332456	0.00585553	0.0458993	-0.341033	0.00253245	0.0277638	-0.399686	0.000777047	0.0192691	-0.385002	0.000263923	0.00412955	-0.163378	0.0126585	0.0968872	-0.170835	0.00619273	0.0640281	0.239987	0.128939	0.798711	0.214225	0.167785	0.785315	0.515985	0.0714489	0.384793	0.476836	0.092366	0.434963
ENSG00000134363	FST	follistatin [Source:HGNC Symbol;Acc:HGNC:3971]	10468	signal transduction; hematopoietic progenitor cell differentiation			Fibroblasts	0.399226	0.000764638	0.017595	0.392003	0.000465264	0.0129345	0.396965	0.000782188	0.0192691	0.375093	0.000388787	0.00496824	0.189856	0.00333019	0.0528757	0.192207	0.00195281	0.0381846	-0.350335	0.0247058	0.687441	-0.390066	0.0109948	0.563079	-0.318038	0.266665	0.546331	-0.366849	0.196798	0.531161
ENSG00000176894	PXMP2	peroxisomal membrane protein 2 [Source:HGNC Symbol;Acc:HGNC:9716]	5827			*	Hepatocytes	-0.262144	0.0298916	0.107162	-0.286753	0.0117358	0.0617806	-0.396486	0.000782644	0.0192691	-0.384825	0.000265786	0.00412955	-0.143571	0.0278906	0.136106	-0.153823	0.0140861	0.0934172	-0.38992	0.0110259	0.63842	-0.454043	0.00288972	0.457325	-0.751254	0.00686032	0.222568	-0.820293	0.00326873	0.192625
ENSG00000134013	LOXL2	lysyl oxidase like 2 [Source:HGNC Symbol;Acc:HGNC:6666]	4017	cell adhesion			Fibroblasts | Endothelial cells | Smooth muscle cells	0.0365467	0.761831	0.541379	0.108719	0.346526	0.365145	0.390731	0.000786217	0.0192747	0.418129	6.61043e-05	0.00242013	0.0471753	0.469095	0.466233	0.0829485	0.190717	0.315341	0.335288	0.0304199	0.71547	0.359624	0.019383	0.578556	0.801065	0.0040131	0.182012	0.868419	0.00178973	0.149713
ENSG00000168077	SCARA3	scavenger receptor class A member 3 [Source:HGNC Symbol;Acc:HGNC:19000]	51435	response to oxidative stress				-0.334318	0.00515199	0.0426152	-0.371306	0.000955363	0.0176026	-0.395566	0.00079341	0.0193686	-0.404252	0.0001201	0.00289012	-0.16876	0.00926593	0.0864419	-0.190461	0.00215731	0.0396914	0.352505	0.0266181	0.688708	0.312929	0.0426602	0.675607	0.486284	0.0940729	0.4136	0.469281	0.0977268	0.442057
ENSG00000215375	MYL5	myosin light chain 5 [Source:HGNC Symbol;Acc:HGNC:7586]	4636		muscle contraction			-0.331182	0.00410786	0.0380998	-0.37167	0.00094372	0.0175045	-0.382221	0.000798626	0.0194137	-0.422358	5.48288e-05	0.00216773	-0.13211	0.0363642	0.154051	-0.158657	0.0112465	0.0836892	0.385618	0.0158833	0.658556	0.382969	0.0125967	0.563079	0.834967	0.00377144	0.176927	0.827366	0.00299859	0.192625
ENSG00000113555	PCDH12	protocadherin 12 [Source:HGNC Symbol;Acc:HGNC:8657]	51294				Endothelial cells | Hepatic stellate cells	0.169915	0.158119	0.250798	0.118025	0.306608	0.343834	0.391256	0.000811257	0.0196379	0.288567	0.00713827	0.0224149	0.0888195	0.172858	0.301534	0.0659116	0.299309	0.384866	0.134772	0.403984	0.85689	0.122909	0.430327	0.850091	0.633705	0.028796	0.298182	0.589397	0.0367061	0.345298
ENSG00000169964	TMEM42	transmembrane protein 42 [Source:HGNC Symbol;Acc:HGNC:28444]	131616					-0.276005	0.0244521	0.0958876	-0.258532	0.0235446	0.0906917	-0.401852	0.000819769	0.0197609	-0.345035	0.00117279	0.00864617	-0.11118	0.0960694	0.236221	-0.107481	0.0889609	0.225192	0.319708	0.0411462	0.743933	0.336677	0.0289047	0.617819	0.457095	0.10948	0.429822	0.487006	0.085519	0.426261
ENSG00000112079	STK38	serine/threonine kinase 38 [Source:HGNC Symbol;Acc:HGNC:17847]	11329	intracellular signal transduction; protein phosphorylation	cellular protein modification process; protein phosphorylation			0.402167	0.000473095	0.0139438	0.412685	0.000216659	0.00899017	0.384025	0.000834329	0.0197984	0.388202	0.000232289	0.00392602	0.196342	0.00173064	0.0404502	0.203892	0.000977623	0.0299576	0.38056	0.0156113	0.656355	0.334035	0.0302202	0.624376	0.937591	0.000870583	0.132253	0.868075	0.00179769	0.149713
ENSG00000130159	ECSIT	ECSIT signaling integrator [Source:HGNC Symbol;Acc:HGNC:29548]	51295	oxidation-reduction process				-0.130024	0.281367	0.334332	-0.170685	0.138026	0.228928	-0.390495	0.000834367	0.0197984	-0.396244	0.000167592	0.00337132	-0.0687717	0.292383	0.377698	-0.092371	0.144635	0.277885	0.176259	0.27529	0.84262	0.156407	0.315077	0.835924	0.766413	0.00790025	0.22389	0.737761	0.00846053	0.249812
ENSG00000077549	CAPZB	capping actin protein of muscle Z-line subunit beta [Source:HGNC Symbol;Acc:HGNC:1491]	832	blood coagulation; actin cytoskeleton organization; cytoskeleton organization; movement of cell or subcellular component; cell morphogenesis	actin cytoskeleton organization; blood coagulation			0.368468	0.00164592	0.024819	0.392878	0.000450887	0.0127529	0.387945	0.000841811	0.0197984	0.405244	0.00011518	0.00283258	0.201902	0.00142212	0.0368562	0.214743	0.000493675	0.0219753	0.309981	0.0509124	0.76927	0.340374	0.0271452	0.615289	0.0897947	0.757961	0.732553	0.118439	0.678127	0.742963
ENSG00000266964	FXYD1	FXYD domain containing ion transport regulator 1 [Source:HGNC Symbol;Acc:HGNC:4025]	5348				Hepatocytes | Smooth muscle cells | Fibroblasts	-0.215722	0.0723647	0.17064	-0.261073	0.0221734	0.0873524	-0.39042	0.000842402	0.0197984	-0.408893	9.86391e-05	0.00263196	-0.1299	0.0450468	0.169099	-0.150376	0.0164733	0.102119	0.319034	0.0365657	0.732896	0.343087	0.0259126	0.608675	0.438432	0.115554	0.434696	0.439894	0.120937	0.470876
ENSG00000179528	LBX2	ladybird homeobox 2 [Source:HGNC Symbol;Acc:HGNC:15525]	85474			*	Hepatocytes	-0.227857	0.063193	0.159324	-0.187964	0.101956	0.195828	-0.398929	0.000846813	0.0197984	-0.311086	0.00361546	0.0155187	-0.0940576	0.158091	0.292005	-0.0811257	0.20074	0.321704	0.330235	0.0335596	0.725558	0.340548	0.0270643	0.614765	0.0954282	0.738371	0.725511	0.136041	0.633524	0.726502
ENSG00000154262	ABCA6	ATP binding cassette subfamily A member 6 [Source:HGNC Symbol;Acc:HGNC:36]	23460	lipid transport			Fibroblasts | Hepatocytes	-0.302639	0.0116258	0.0661884	-0.340504	0.0025739	0.0277916	-0.393342	0.000847109	0.0197984	-0.400906	0.00013818	0.00306081	-0.150072	0.021126	0.120095	-0.168213	0.00706727	0.0684431	0.316908	0.0473878	0.765133	0.290607	0.0601779	0.682706	0.577696	0.0465079	0.344811	0.537305	0.0573672	0.384461
ENSG00000164506	STXBP5	syntaxin binding protein 5 [Source:HGNC Symbol;Acc:HGNC:19665]	134957	positive regulation of GTPase activity; protein transport				0.160557	0.183396	0.270786	0.20418	0.0752551	0.167627	0.390555	0.0008502	0.0197984	0.398708	0.000151393	0.00323501	0.0488987	0.45551	0.460231	0.0716169	0.259167	0.362632	0.42397	0.00673773	0.605959	0.435159	0.00437857	0.457325	0.860109	0.00233739	0.156875	0.826924	0.00301484	0.192625
ENSG00000067177	PHKA1	phosphorylase kinase regulatory subunit alpha 1 [Source:HGNC Symbol;Acc:HGNC:8925]	5255	small molecule metabolic process; generation of precursor metabolites and energy				-0.208496	0.0818332	0.178841	-0.240023	0.0358853	0.113135	-0.389031	0.000852936	0.0197984	-0.395663	0.000171643	0.00339521	-0.121045	0.0615309	0.193575	-0.136723	0.0296688	0.135411	-0.261516	0.0803269	0.770751	-0.297199	0.0544821	0.682706	-0.328684	0.22823	0.524395	-0.384162	0.176298	0.520915
ENSG00000065154	OAT	ornithine aminotransferase [Source:HGNC Symbol;Acc:HGNC:8091]	4942	small molecule metabolic process; cellular nitrogen compound metabolic process				-0.448511	1.59204e-05	0.00368877	-0.556249	2.4943e-07	0.000288075	-0.352405	0.00085637	0.0197984	-0.499161	1.16861e-06	0.000462927	-0.19901	0.000510161	0.0246222	-0.259669	1.8425e-05	0.00597372	0.355395	0.0259915	0.688708	0.33207	0.031231	0.62781	0.855072	0.00285506	0.16615	0.821764	0.00321082	0.192625
ENSG00000076513	ANKRD13A	ankyrin repeat domain 13A [Source:HGNC Symbol;Acc:HGNC:21268]	88455					0.325966	0.00721425	0.051084	0.345132	0.00223091	0.0263396	0.398478	0.00085697	0.0197984	0.386096	0.00025269	0.00411801	0.164739	0.0123189	0.0955812	0.176466	0.00463107	0.0559382	0.341554	0.0294155	0.712288	0.306432	0.0472545	0.680192	0.814841	0.00384348	0.177588	0.786496	0.00488456	0.221624
ENSG00000105063	PPP6R1	protein phosphatase 6 regulatory subunit 1 [Source:HGNC Symbol;Acc:HGNC:29195]	22870					0.34289	0.00349162	0.0358029	0.30948	0.00637708	0.044637	0.386889	0.000860551	0.0197984	0.326065	0.0022339	0.0121752	0.176269	0.00563535	0.0672099	0.160719	0.0101961	0.0809029	0.176143	0.273581	0.842326	0.201855	0.193961	0.800341	0.157451	0.590871	0.682531	0.196781	0.490124	0.677034
ENSG00000153214	TMEM87B	transmembrane protein 87B [Source:HGNC Symbol;Acc:HGNC:25913]	84910					0.523715	5.37973e-06	0.00249013	0.514826	2.35398e-06	0.000858532	0.392245	0.000865628	0.0197984	0.386807	0.000245618	0.00404114	0.248402	8.46767e-05	0.0161504	0.250328	3.89616e-05	0.00828128	-0.378807	0.016796	0.665926	-0.337691	0.0284125	0.615781	-0.307328	0.291665	0.559839	-0.308143	0.278934	0.58269
ENSG00000170345	FOS	Fos proto-oncogene, AP-1 transcription factor subunit [Source:HGNC Symbol;Acc:HGNC:3796]	2353	response to cAMP; response to drug; response to toxic substance	cellular response to calcium ion; cellular response to hormone stimulus; aging; response to lipopolysaccharide; nervous system development; response to drug			-0.389451	0.00109255	0.0206817	-0.407543	0.000263143	0.00966452	-0.395182	0.000866383	0.0197984	-0.399703	0.000145275	0.00315667	-0.193266	0.00288104	0.0505351	-0.206025	0.000857468	0.0287657	0.232891	0.149577	0.814915	0.214687	0.166859	0.785315	0.712763	0.0140398	0.251853	0.680417	0.0154591	0.287023
ENSG00000167105	TMEM92	transmembrane protein 92 [Source:HGNC Symbol;Acc:HGNC:26579]	162461					0.289984	0.0166175	0.0784223	0.26233	0.0215211	0.0860051	0.395483	0.000871593	0.0197984	0.334036	0.0017122	0.010522	0.121339	0.0657786	0.200022	0.112948	0.0736284	0.206162	0.291577	0.0680339	0.770375	0.265057	0.0870009	0.710236	0.750965	0.00894727	0.231824	0.715101	0.0107955	0.254364
ENSG00000137133	HINT2	histidine triad nucleotide binding protein 2 [Source:HGNC Symbol;Acc:HGNC:18344]	84681				Hepatocytes	-0.286497	0.0157493	0.0762616	-0.328585	0.00368575	0.0332677	-0.3875	0.00087613	0.0197984	-0.405381	0.000114514	0.00283258	-0.154576	0.0160562	0.106909	-0.174222	0.00520572	0.0590544	0.370219	0.0134162	0.638764	0.397256	0.00955629	0.553705	0.660284	0.0152244	0.255827	0.653957	0.0201054	0.302525
ENSG00000176953	NFATC2IP	nuclear factor of activated T cells 2 interacting protein [Source:HGNC Symbol;Acc:HGNC:25906]	84901					0.315897	0.00894284	0.0570827	0.326149	0.00395992	0.0346304	0.395764	0.000876309	0.0197984	0.382369	0.00029287	0.00435681	0.163399	0.0125991	0.096869	0.170898	0.00617293	0.0639741	0.330201	0.0374439	0.732896	0.295987	0.0554947	0.682706	0.751532	0.00860674	0.231075	0.717203	0.0105575	0.254306
ENSG00000131910	NR0B2	nuclear receptor subfamily 0 group B member 2 [Source:HGNC Symbol;Acc:HGNC:7961]	8431	steroid hormone mediated signaling pathway		*	Hepatocytes | Cholangiocytes	-0.206419	0.0875409	0.185072	-0.25908	0.023243	0.0900496	-0.391046	0.000884584	0.0199073	-0.410834	9.07666e-05	0.00261132	-0.105326	0.107456	0.24703	-0.130232	0.0385719	0.15507	0.222927	0.162297	0.814915	0.185587	0.232709	0.812385	0.526303	0.068156	0.380413	0.459706	0.10487	0.451873
ENSG00000110031	LPXN	leupaxin [Source:HGNC Symbol;Acc:HGNC:14061]	9404	signal transduction; cell adhesion			T-cells | Plasma cells | Macrophages | dendritic cells | B-cells	0.199608	0.0840411	0.181136	0.300276	0.00820839	0.0504789	0.373548	0.000898665	0.0199893	0.461104	8.79485e-06	0.00116132	0.106018	0.0899869	0.229612	0.153421	0.014348	0.0942411	-0.218821	0.164442	0.815145	-0.234572	0.130547	0.770693	-0.383816	0.179441	0.490212	-0.373149	0.189147	0.525466
ENSG00000163815	CLEC3B	C-type lectin domain family 3 member B [Source:HGNC Symbol;Acc:HGNC:11891]	7123				Fibroblasts | Hepatic stellate cells	-0.285658	0.0119165	0.0665717	-0.242673	0.0338401	0.109938	-0.3706	0.000904397	0.0199893	-0.296319	0.00568075	0.0198875	-0.140585	0.0226084	0.123082	-0.119055	0.0590922	0.186978	0.144485	0.367853	0.852781	0.168482	0.278956	0.828115	0.630545	0.0286042	0.298169	0.667678	0.017565	0.295502
ENSG00000189077	TMEM120A	transmembrane protein 120A [Source:HGNC Symbol;Acc:HGNC:21697]	83862					-0.18255	0.136729	0.233538	-0.20601	0.0726331	0.16511	-0.395556	0.00090481	0.0199893	-0.384783	0.000266228	0.00412955	-0.103198	0.119781	0.259422	-0.117282	0.0630485	0.191576	0.250432	0.115221	0.797116	0.247642	0.110188	0.742935	1.00103	0.000358158	0.121603	0.948549	0.000604328	0.1278
ENSG00000107185	RGP1	RGP1 homolog, RAB6A GEF complex partner 1 [Source:HGNC Symbol;Acc:HGNC:21965]	9827	positive regulation of GTPase activity; retrograde transport, endosome to Golgi				0.300087	0.0122569	0.0674598	0.252433	0.027134	0.0973874	0.390774	0.000905451	0.0199893	0.308639	0.0039026	0.0161296	0.120633	0.064916	0.198696	0.103275	0.102396	0.240583	0.324855	0.0407487	0.743933	0.297812	0.0539757	0.682706	0.447612	0.12242	0.441077	0.414399	0.144323	0.496413
ENSG00000133275	CSNK1G2	casein kinase 1 gamma 2 [Source:HGNC Symbol;Acc:HGNC:2455]	1455	signal transduction; protein phosphorylation; regulation of cell shape; endocytosis; peptidyl-serine phosphorylation	peptidyl-serine phosphorylation; protein phosphorylation; sphingolipid metabolic process; small molecule metabolic process			0.435357	0.000278854	0.0110741	0.395868	0.000404753	0.0120377	0.39839	0.000905701	0.0199893	0.332472	0.0018049	0.0107703	0.215403	0.00096014	0.0309969	0.202375	0.00107226	0.0307892	0.298012	0.0576468	0.770375	0.309906	0.0447498	0.675607	0.813905	0.00380269	0.177456	0.814058	0.00352473	0.198792
ENSG00000089847	ANKRD24	ankyrin repeat domain 24 [Source:HGNC Symbol;Acc:HGNC:29424]	170961					-0.0915453	0.456589	0.427284	-0.147373	0.201024	0.278609	-0.394449	0.000909871	0.0199893	-0.399464	0.000146723	0.00316146	-0.0754084	0.256044	0.355925	-0.0992278	0.116776	0.252907	0.270896	0.0914556	0.77938	0.274867	0.0757557	0.699728	0.910674	0.00142275	0.141376	0.891907	0.00131622	0.143307
ENSG00000086827	ZW10	zw10 kinetochore protein [Source:HGNC Symbol;Acc:HGNC:13194]	9183	small GTPase mediated signal transduction; protein transport				0.226821	0.0615914	0.15712	0.1955	0.0887481	0.18211	0.392367	0.000914367	0.0199893	0.317842	0.00291823	0.0139888	0.104294	0.113176	0.253037	0.0913948	0.148977	0.281444	-0.29911	0.0591294	0.770375	-0.325846	0.0346238	0.643484	-0.236992	0.414084	0.618468	-0.258054	0.365015	0.62615
ENSG00000198585	NUDT16	nudix hydrolase 16 [Source:HGNC Symbol;Acc:HGNC:26442]	131870	small molecule metabolic process			Kupffer cells	-0.116564	0.339582	0.367663	-0.149953	0.193179	0.273687	-0.391701	0.00091677	0.0199893	-0.379561	0.00032696	0.00463014	-0.0759571	0.249522	0.351348	-0.0940959	0.137195	0.271508	-0.2982	0.052998	0.76927	-0.312255	0.0431184	0.675607	-0.489023	0.0811546	0.399374	-0.52109	0.0654672	0.398567
ENSG00000198515	CNGA1	cyclic nucleotide gated channel subunit alpha 1 [Source:HGNC Symbol;Acc:HGNC:2148]	1259					-0.463287	0.000101134	0.00741787	-0.449924	4.84571e-05	0.00479191	-0.397922	0.000919456	0.0199893	-0.372292	0.000432843	0.00521171	-0.235501	0.000279913	0.0204913	-0.234902	0.000124218	0.0119302	0.353203	0.0237491	0.684653	0.338649	0.0279543	0.615781	0.402541	0.159535	0.478283	0.347862	0.221193	0.548379
ENSG00000131653	TRAF7	TNF receptor associated factor 7 [Source:HGNC Symbol;Acc:HGNC:20456]	84231	protein ubiquitination	apoptotic process			0.390807	0.00104108	0.0204234	0.329201	0.00361916	0.0330862	0.392898	0.000927261	0.020059	0.303413	0.00458505	0.017689	0.191027	0.00322739	0.0522085	0.166	0.00788837	0.072031	-0.423471	0.00638394	0.605959	-0.429725	0.00491826	0.467453	-0.669364	0.0181896	0.267957	-0.634028	0.0243534	0.311327
ENSG00000133193	FAM104A	family with sequence similarity 104 member A [Source:HGNC Symbol;Acc:HGNC:25918]	84923					0.0896736	0.462469	0.430154	0.159515	0.166036	0.253763	0.39064	0.000934341	0.020059	0.41053	9.19599e-05	0.002612	0.050593	0.443498	0.455023	0.0821597	0.195009	0.318014	0.297416	0.0639243	0.770375	0.308903	0.0454612	0.679605	0.280435	0.339483	0.582693	0.30646	0.281585	0.583624
ENSG00000072110	ACTN1	actinin alpha 1 [Source:HGNC Symbol;Acc:HGNC:163]	87	blood coagulation; extracellular matrix organization; platelet activation; platelet degranulation; actin filament bundle assembly; cell junction assembly; actin filament organization				0.249058	0.037809	0.120519	0.295973	0.00921321	0.0538313	0.387545	0.000947894	0.020059	0.41472	7.67309e-05	0.00247704	0.14619	0.0239354	0.125869	0.170253	0.00637824	0.0646727	0.37836	0.0172325	0.665926	0.370728	0.0158397	0.574659	0.696033	0.0157793	0.256654	0.679111	0.0156644	0.287023
ENSG00000136603	SKIL	SKI like proto-oncogene [Source:HGNC Symbol;Acc:HGNC:10897]	6498	cell cycle arrest; response to cytokine; transforming growth factor beta receptor signaling pathway; spermatogenesis				0.280784	0.0216558	0.0903435	0.270773	0.0175495	0.0772408	0.396145	0.000950703	0.020059	0.352683	0.000894322	0.0074283	0.0636565	0.341955	0.405828	0.0683919	0.281383	0.375028	0.348084	0.0268114	0.688708	0.360781	0.0189844	0.576312	0.502952	0.0796291	0.397273	0.524721	0.0635772	0.396642
ENSG00000235169	SMIM1	small integral membrane protein 1 (Vel blood group) [Source:HGNC Symbol;Acc:HGNC:44204]	388588				Erythroid cells	-0.334263	0.00306786	0.0338957	-0.390626	0.000488758	0.0129637	-0.369305	0.000953071	0.020059	-0.422673	5.40638e-05	0.00216773	-0.187432	0.00210919	0.0429431	-0.212077	0.000586112	0.0236664	0.247131	0.121856	0.797923	0.20608	0.184709	0.798251	0.667947	0.0202098	0.27187	0.632154	0.0247895	0.312982
ENSG00000100889	PCK2	phosphoenolpyruvate carboxykinase 2, mitochondrial [Source:HGNC Symbol;Acc:HGNC:8725]	5106	small molecule metabolic process		*	Hepatocytes	-0.214269	0.0731132	0.17138	-0.267404	0.0190511	0.0807528	-0.384918	0.000956315	0.020059	-0.409689	9.53383e-05	0.00261984	-0.114842	0.0759054	0.211975	-0.138963	0.0270312	0.129534	0.234758	0.139615	0.804748	0.259474	0.0939697	0.719375	0.644895	0.0242407	0.286103	0.628412	0.0256806	0.316386
ENSG00000107021	TBC1D13	TBC1 domain family member 13 [Source:HGNC Symbol;Acc:HGNC:25571]	54662	positive regulation of GTPase activity			monocytes	0.346283	0.00382853	0.0372337	0.328308	0.00371609	0.0333995	0.391102	0.000957786	0.020059	0.333812	0.0017252	0.010539	0.196169	0.00240422	0.0462909	0.18888	0.00235892	0.0409917	0.200827	0.214355	0.828895	0.206528	0.183746	0.798251	0.713541	0.013857	0.251853	0.72038	0.0102064	0.253076
ENSG00000144908	ALDH1L1	aldehyde dehydrogenase 1 family member L1 [Source:HGNC Symbol;Acc:HGNC:3978]	10840	oxidation-reduction process; one-carbon metabolic process; methylation			Hepatocytes	-0.234904	0.0488575	0.137728	-0.308405	0.00657056	0.0452782	-0.384592	0.000958045	0.020059	-0.428039	4.2484e-05	0.00207616	-0.123237	0.0562991	0.186204	-0.158176	0.0115047	0.0840865	0.172555	0.283578	0.845772	0.158436	0.308804	0.834456	0.93333	0.00102967	0.132253	0.897388	0.00122356	0.139177
ENSG00000099769	IGFALS	insulin like growth factor binding protein acid labile subunit [Source:HGNC Symbol;Acc:HGNC:5468]	3483			*	Hepatocytes | Cholangiocytes	-0.222258	0.0545878	0.14686	-0.315667	0.00535909	0.040158	-0.372565	0.000963062	0.020059	-0.450279	1.49877e-05	0.00137301	-0.100363	0.109821	0.249102	-0.144608	0.0212511	0.11437	0.383509	0.0141754	0.638764	0.367594	0.0167779	0.574659	0.826559	0.0033614	0.176159	0.831363	0.00285493	0.192625
ENSG00000116761	CTH	cystathionine gamma-lyase [Source:HGNC Symbol;Acc:HGNC:2501]	1491	small molecule metabolic process; cellular nitrogen compound metabolic process; protein homotetramerization; sulfur amino acid metabolic process		*	Hepatocytes	-0.409048	0.00043543	0.013369	-0.4476	5.34613e-05	0.00479963	-0.38386	0.000965691	0.020059	-0.42223	5.51429e-05	0.00216773	-0.227184	0.000296836	0.0204913	-0.251856	3.45534e-05	0.00797891	0.202247	0.204222	0.825564	0.200999	0.195876	0.801324	0.301301	0.298306	0.563984	0.262106	0.3575	0.622762
ENSG00000247271	ZBED5-AS1	ZBED5 antisense RNA 1 [Source:HGNC Symbol;Acc:HGNC:48646]	729013					-0.213452	0.0806241	0.17814	-0.237399	0.0380106	0.116443	-0.392801	0.000967299	0.020059	-0.373417	0.000414623	0.00514509	-0.126089	0.0560508	0.186044	-0.136325	0.03016	0.136213	-0.192266	0.193378	0.82374	-0.0902563	0.562816	0.873656	-0.757895	0.0040184	0.182012	-0.581063	0.0395154	0.34965
ENSG00000250799	PRODH2	proline dehydrogenase 2 [Source:HGNC Symbol;Acc:HGNC:17325]	58510	oxidation-reduction process		*	Hepatocytes	-0.199456	0.090126	0.188322	-0.273915	0.0162418	0.0740897	-0.378142	0.000968735	0.020059	-0.423615	5.18405e-05	0.00216773	-0.131778	0.0377146	0.156109	-0.16221	0.00949117	0.078292	0.187707	0.246461	0.841091	0.168676	0.278399	0.828115	0.188898	0.52177	0.659304	0.179206	0.529781	0.692661
ENSG00000105398	SULT2A1	sulfotransferase family 2A member 1 [Source:HGNC Symbol;Acc:HGNC:11458]	6822	small molecule metabolic process; xenobiotic metabolic process; steroid metabolic process; cellular lipid metabolic process	xenobiotic metabolic process	*	Hepatocytes	-0.324662	0.00593381	0.045912	-0.353969	0.00168807	0.0228024	-0.384145	0.000970607	0.020059	-0.386264	0.000250998	0.00410344	-0.153741	0.0165914	0.107837	-0.167141	0.00745521	0.0704708	0.264932	0.0873712	0.775803	0.218135	0.16008	0.785315	0.48911	0.0821213	0.40119	0.415419	0.143327	0.495728
ENSG00000196616	ADH1B	alcohol dehydrogenase 1B (class I), beta polypeptide [Source:HGNC Symbol;Acc:HGNC:250]	125	small molecule metabolic process; xenobiotic metabolic process	xenobiotic metabolic process		Fibroblasts | Hepatocytes	-0.321993	0.00675423	0.0495909	-0.373086	0.000899589	0.0170789	-0.386712	0.000971404	0.020059	-0.41883	6.40968e-05	0.00239864	-0.157606	0.0146503	0.102073	-0.183668	0.00314942	0.0456313	0.314943	0.0383674	0.741814	0.33117	0.0317039	0.632901	0.234685	0.400216	0.610976	0.241389	0.396932	0.641153
ENSG00000157326	DHRS4	dehydrogenase/reductase 4 [Source:HGNC Symbol;Acc:HGNC:16985]	10901	oxidation-reduction process; steroid metabolic process				-0.158803	0.193602	0.27767	-0.206462	0.0719967	0.164385	-0.390957	0.000975316	0.0200678	-0.403668	0.000123091	0.00292116	-0.100831	0.126417	0.266153	-0.123534	0.0499971	0.172717	0.224837	0.161772	0.814915	0.203629	0.190037	0.800341	0.49181	0.0910712	0.410885	0.485901	0.0862425	0.42821
ENSG00000258867	HISLA	HIF1A stabilizing long noncoding RNA [Source:HGNC Symbol;Acc:HGNC:49467]	283587			*		-0.267221	0.0260049	0.0990583	-0.294875	0.00948611	0.0548005	-0.387364	0.000987822	0.0201831	-0.376297	0.000371149	0.00487585	-0.149573	0.0211493	0.120095	-0.160646	0.0102321	0.0809029	-0.294783	0.0622849	0.770375	-0.30485	0.0484332	0.682706	-0.913674	0.00116944	0.135225	-0.868772	0.0017816	0.149713
ENSG00000163884	KLF15	KLF transcription factor 15 [Source:HGNC Symbol;Acc:HGNC:14536]	28999				Hepatocytes	-0.178897	0.131762	0.229808	-0.253307	0.0265926	0.0966821	-0.379536	0.00100703	0.0201831	-0.426757	4.50187e-05	0.00211012	-0.0797824	0.215087	0.328936	-0.115033	0.0683729	0.199379	-0.277783	0.0846433	0.770751	-0.253006	0.102585	0.732224	-0.282085	0.337701	0.581479	-0.258583	0.364028	0.625612
ENSG00000166925	TSC22D4	TSC22 domain family member 4 [Source:HGNC Symbol;Acc:HGNC:21696]	81628					0.393362	0.000975824	0.0199254	0.38921	0.000514042	0.0131668	0.390801	0.00100796	0.0201831	0.349399	0.00100552	0.00796648	0.246851	0.000109589	0.0167511	0.24074	8.09809e-05	0.0103171	0.240469	0.134281	0.803334	0.232405	0.134183	0.770693	0.352972	0.227132	0.523548	0.366934	0.196693	0.531046
ENSG00000105676	ARMC6	armadillo repeat containing 6 [Source:HGNC Symbol;Acc:HGNC:25049]	93436					-0.160811	0.175864	0.265346	-0.237607	0.0378383	0.116329	-0.379366	0.00100824	0.0201831	-0.436835	2.83721e-05	0.00173974	-0.0650357	0.312773	0.38863	-0.104778	0.0974231	0.234757	0.24443	0.126903	0.798269	0.267957	0.0835473	0.703068	0.553863	0.0558733	0.362048	0.572085	0.0427405	0.359811
ENSG00000079805	DNM2	dynamin 2 [Source:HGNC Symbol;Acc:HGNC:2974]	1785	signal transduction; positive regulation of lamellipodium assembly; endocytosis; positive regulation of apoptotic process; antigen processing and presentation of exogenous peptide antigen via MHC class II; membrane organization; spermatogenesis				0.267249	0.0303133	0.107921	0.2521	0.0273428	0.0977076	0.397193	0.00100891	0.0201831	0.341525	0.00132523	0.00917286	0.130199	0.0517431	0.179753	0.126585	0.0444871	0.163546	0.216415	0.175901	0.816199	0.189976	0.221762	0.812014	0.466681	0.107209	0.426384	0.447356	0.114677	0.465263
ENSG00000170634	ACYP2	acylphosphatase 2 [Source:HGNC Symbol;Acc:HGNC:180]	98					-0.326648	0.00660566	0.0491528	-0.332347	0.00329558	0.0317156	-0.39008	0.0010094	0.0201831	-0.355425	0.000810181	0.00698813	-0.164749	0.0115797	0.0928795	-0.166329	0.00776137	0.0715992	0.348848	0.0257002	0.688559	0.364162	0.0178601	0.574909	0.997515	0.000328188	0.121603	0.942646	0.000657043	0.1278
ENSG00000109819	PPARGC1A	PPARG coactivator 1 alpha [Source:HGNC Symbol;Acc:HGNC:9237]	10891	respiratory electron transport chain; androgen metabolic process; response to starvation; cellular response to tumor necrosis factor	cellular response to hypoxia; circadian rhythm; cellular response to tumor necrosis factor			-0.417103	0.000148237	0.0084989	-0.492399	7.1357e-06	0.00175926	-0.363531	0.00101395	0.0201831	-0.445508	1.88529e-05	0.00144907	-0.196734	0.00106179	0.032067	-0.233935	0.000133173	0.0124564	0.247412	0.121774	0.797868	0.250166	0.106558	0.73849	0.3342	0.251149	0.53746	0.341341	0.230045	0.551854
ENSG00000024048	UBR2	ubiquitin protein ligase E3 component n-recognin 2 [Source:HGNC Symbol;Acc:HGNC:21289]	23304	spermatogenesis				0.318059	0.00803043	0.0542436	0.268749	0.0184389	0.0792644	0.388514	0.00101854	0.0201831	0.292994	0.00626994	0.020818	0.166338	0.0105055	0.0901308	0.142914	0.022863	0.119263	0.132879	0.402606	0.856092	0.166143	0.285725	0.831819	0.538634	0.0596115	0.365753	0.549966	0.0516288	0.376511
ENSG00000175287	PHYHD1	phytanoyl-CoA dioxygenase domain containing 1 [Source:HGNC Symbol;Acc:HGNC:23396]	254295	oxidation-reduction process	oxidation-reduction process			-0.365962	0.00181217	0.026209	-0.384543	0.000606102	0.0135485	-0.382726	0.00102015	0.0201831	-0.390772	0.000209463	0.00379819	-0.148929	0.0204735	0.118503	-0.162206	0.00949343	0.078292	-0.297488	0.0557957	0.770375	-0.292948	0.0581024	0.682706	-0.216645	0.447028	0.632545	-0.215824	0.44899	0.661632
ENSG00000100116	GCAT	glycine C-acetyltransferase [Source:HGNC Symbol;Acc:HGNC:4188]	23464	cellular amino acid metabolic process				-0.314672	0.00694382	0.0500792	-0.387554	0.000545141	0.0131668	-0.377542	0.00102434	0.0201831	-0.444371	1.99028e-05	0.00146078	-0.186489	0.00298114	0.0507626	-0.22228	0.000299834	0.0187759	-0.205546	0.196515	0.824621	-0.169681	0.275528	0.828115	-0.655464	0.0219407	0.277125	-0.633244	0.0245351	0.311327
ENSG00000185189	NRBP2	nuclear receptor binding protein 2 [Source:HGNC Symbol;Acc:HGNC:19339]	340371					-0.186451	0.130993	0.229163	-0.195429	0.0888644	0.18211	-0.394242	0.00102438	0.0201831	-0.358281	0.000730287	0.00662932	-0.078631	0.240361	0.345031	-0.0851626	0.179035	0.305953	0.25962	0.103589	0.796904	0.237781	0.125301	0.766034	0.715889	0.0125232	0.246801	0.708582	0.0115641	0.259295
ENSG00000049759	NEDD4L	NEDD4 like E3 ubiquitin protein ligase [Source:HGNC Symbol;Acc:HGNC:7728]	23327	excretion				-0.301422	0.0098594	0.0596356	-0.239662	0.0361717	0.11381	-0.377476	0.00102937	0.0201831	-0.272239	0.0113268	0.029253	-0.144224	0.0230514	0.123942	-0.120062	0.0569387	0.183842	0.251994	0.104011	0.797116	0.20609	0.184686	0.798251	0.721883	0.00946787	0.233757	0.601862	0.0328178	0.334024
ENSG00000132514	CLEC10A	C-type lectin domain containing 10A [Source:HGNC Symbol;Acc:HGNC:16916]	10462				Macrophages | Kupffer cells	-0.13406	0.260033	0.322746	-0.160191	0.164229	0.252584	-0.378816	0.00102997	0.0201831	-0.376467	0.000368706	0.00485614	-0.0487406	0.450049	0.457649	-0.0637705	0.315374	0.392807	0.183221	0.235682	0.834814	0.197936	0.202841	0.804366	0.615035	0.026821	0.292922	0.654638	0.0199722	0.302525
ENSG00000176903	PNMA1	PNMA family member 1 [Source:HGNC Symbol;Acc:HGNC:9158]	9240	positive regulation of apoptotic process				0.233229	0.0464227	0.134226	0.272577	0.0167879	0.0753942	0.3754	0.00103655	0.0201831	0.396264	0.000167453	0.00337132	0.132261	0.0366447	0.154428	0.149669	0.0170037	0.10415	0.308109	0.0532321	0.76927	0.306611	0.0471228	0.680192	0.987789	0.000473265	0.131866	0.97813	0.000393838	0.127109
ENSG00000181513	ACBD4	acyl-CoA binding domain containing 4 [Source:HGNC Symbol;Acc:HGNC:23337]	79777					-0.305805	0.00812982	0.0546142	-0.365039	0.0011777	0.0196141	-0.373554	0.00103746	0.0201831	-0.422662	5.40901e-05	0.00216773	-0.164844	0.00837937	0.0821508	-0.1925	0.00192027	0.0381846	0.284423	0.0697613	0.770375	0.240862	0.120418	0.757504	0.611955	0.0309965	0.299139	0.602476	0.0326354	0.333895
ENSG00000058404	CAMK2B	calcium/calmodulin dependent protein kinase II beta [Source:HGNC Symbol;Acc:HGNC:1461]	816	response to cadmium ion				0.0393542	0.747639	0.536171	-0.00557665	0.961582	0.579374	-0.387747	0.00103774	0.0201831	-0.359906	0.000688108	0.00647824	-0.00872813	0.895098	0.610979	-0.0235631	0.711309	0.553701	0.397689	0.0103316	0.63842	0.349184	0.023315	0.600045	0.735121	0.00898795	0.231824	0.667949	0.0175177	0.295502
ENSG00000131236	CAP1	cyclase associated actin cytoskeleton regulatory protein 1 [Source:HGNC Symbol;Acc:HGNC:20040]	10487	blood coagulation; actin cytoskeleton organization; signal transduction; platelet activation; platelet degranulation; axon guidance	actin cytoskeleton organization; blood coagulation			0.386087	0.0011297	0.0209814	0.393525	0.000440519	0.0125622	0.387156	0.00104047	0.0201831	0.381628	0.000301541	0.00442413	0.198692	0.00201697	0.041847	0.204879	0.000920279	0.0291854	-0.398243	0.0115201	0.63842	-0.357369	0.0201802	0.584041	-0.634301	0.0273366	0.294326	-0.577204	0.0408758	0.355055
ENSG00000087076	HSD17B14	hydroxysteroid 17-beta dehydrogenase 14 [Source:HGNC Symbol;Acc:HGNC:23238]	51171	oxidation-reduction process				-0.271478	0.0224814	0.0918553	-0.327681	0.00378546	0.0336736	-0.382282	0.00104957	0.0202222	-0.425114	4.84733e-05	0.00213356	-0.109997	0.0895549	0.229222	-0.144529	0.0213245	0.114515	0.145129	0.363625	0.852136	0.126384	0.417363	0.849389	0.146283	0.614632	0.690494	0.167705	0.556577	0.700451
ENSG00000155903	RASA2	RAS p21 protein activator 2 [Source:HGNC Symbol;Acc:HGNC:9872]	5922	signal transduction; axon guidance; positive regulation of GTPase activity; small GTPase mediated signal transduction; vascular endothelial growth factor receptor signaling pathway; innate immune response				0.0644528	0.565478	0.471976	0.204505	0.0747836	0.166899	0.355403	0.00105033	0.0202222	0.487262	2.25227e-06	0.000554254	0.0436896	0.47127	0.466895	0.110693	0.0796713	0.21401	0.136722	0.392731	0.854871	0.151688	0.32998	0.839558	0.165908	0.568339	0.67438	0.157438	0.581033	0.709758
ENSG00000106049	HIBADH	3-hydroxyisobutyrate dehydrogenase [Source:HGNC Symbol;Acc:HGNC:4907]	11112	small molecule metabolic process; oxidation-reduction process; cellular nitrogen compound metabolic process; branched-chain amino acid catabolic process				-0.216409	0.072039	0.170254	-0.251491	0.0277275	0.0986347	-0.384241	0.00105651	0.0202222	-0.381957	0.000297665	0.00439228	-0.11127	0.0876552	0.226935	-0.125915	0.0456509	0.165638	-0.349771	0.0267323	0.688708	-0.306118	0.0474867	0.680192	-0.635925	0.0265344	0.292922	-0.547183	0.0528478	0.377668
ENSG00000169738	DCXR	dicarbonyl and L-xylulose reductase [Source:HGNC Symbol;Acc:HGNC:18985]	51181	oxidation-reduction process; protein homotetramerization		*	Hepatocytes	-0.225567	0.0603032	0.155029	-0.261909	0.0217379	0.0864228	-0.383828	0.00105653	0.0202222	-0.390382	0.000212785	0.00380394	-0.126361	0.0516043	0.179737	-0.142647	0.0231264	0.119871	0.13756	0.39144	0.854871	0.133306	0.392221	0.843033	0.468347	0.106198	0.425477	0.436278	0.124064	0.473408
ENSG00000089159	PXN	paxillin [Source:HGNC Symbol;Acc:HGNC:9718]	5829	signal transduction; cell adhesion; regulation of cell shape; cytoskeleton organization; cell junction assembly; vascular endothelial growth factor receptor signaling pathway; transforming growth factor beta receptor signaling pathway				0.295281	0.0121773	0.0672276	0.290471	0.0106539	0.0585337	0.37917	0.00106655	0.0203465	0.353056	0.000882437	0.00734143	0.164384	0.00981661	0.0879354	0.16169	0.00973228	0.0791139	0.134336	0.403681	0.856494	0.106304	0.49537	0.86069	0.489706	0.0916502	0.411316	0.45452	0.108905	0.459621
ENSG00000132744	ACY3	aminoacylase 3 [Source:HGNC Symbol;Acc:HGNC:24104]	91703	small molecule metabolic process; xenobiotic metabolic process		*		-0.31885	0.00883942	0.0566796	-0.334074	0.0031292	0.0308013	-0.392508	0.00107204	0.0203836	-0.375776	0.000378677	0.00491208	-0.163612	0.0132107	0.0984536	-0.174108	0.0052363	0.0592535	0.247519	0.11048	0.797116	0.244882	0.114268	0.749729	0.33272	0.238946	0.531334	0.293936	0.301838	0.59391
ENSG00000107819	SFXN3	sideroflexin 3 [Source:HGNC Symbol;Acc:HGNC:16087]	81855	ion transmembrane transport				0.0658115	0.589796	0.482195	0.0916945	0.427555	0.404973	0.385623	0.00109075	0.0206239	0.360656	0.000669411	0.00643155	0.0560666	0.395361	0.433175	0.068414	0.281227	0.375018	-0.313148	0.0430221	0.754722	-0.355354	0.0209164	0.584041	-0.499604	0.0762099	0.389948	-0.551109	0.0511348	0.375834
ENSG00000121361	KCNJ8	potassium inwardly rectifying channel subfamily J member 8 [Source:HGNC Symbol;Acc:HGNC:6269]	3764		synaptic transmission; response to lipopolysaccharide		Smooth muscle cells	-0.391874	0.000485961	0.0141043	-0.448874	5.06606e-05	0.00479191	-0.366943	0.00109254	0.0206239	-0.415328	7.47237e-05	0.00247704	-0.177537	0.00385468	0.0575117	-0.204434	0.000945729	0.0294863	0.354752	0.021346	0.684653	0.41146	0.00719168	0.507628	0.301439	0.287118	0.556612	0.394949	0.164344	0.511323
ENSG00000268006	PTOV1-AS1	PTOV1 antisense RNA 1 [Source:HGNC Symbol;Acc:HGNC:44174]	100506033					-0.317285	0.00683033	0.0496928	-0.323221	0.00431353	0.0362192	-0.377877	0.00109542	0.0206239	-0.376518	0.000367986	0.00485614	-0.165789	0.0090927	0.0859975	-0.174567	0.00511324	0.0588627	-0.301201	0.0523183	0.76927	-0.363201	0.0181737	0.575376	-0.276169	0.331041	0.57868	-0.354129	0.212917	0.542755
ENSG00000077585	GPR137B	G protein-coupled receptor 137B [Source:HGNC Symbol;Acc:HGNC:11862]	7107					0.0889427	0.454926	0.42656	0.138141	0.23096	0.29748	0.376064	0.00109951	0.0206336	0.384828	0.00026575	0.00412955	0.0574371	0.372153	0.421561	0.0852726	0.178469	0.305551	0.177714	0.245885	0.840985	0.256541	0.0978026	0.726317	0.208133	0.45521	0.634991	0.298787	0.293883	0.588872
ENSG00000139914	FITM1	fat storage inducing transmembrane protein 1 [Source:HGNC Symbol;Acc:HGNC:33714]	161247				Hepatocytes	-0.263484	0.0209552	0.088904	-0.280661	0.0137161	0.0669819	-0.365303	0.00110622	0.0206875	-0.355247	0.000815437	0.00699885	-0.131459	0.0336652	0.14885	-0.136021	0.0305392	0.136607	0.252425	0.116422	0.797116	0.226873	0.143816	0.782191	0.10844	0.712149	0.719413	0.112962	0.692244	0.747695
ENSG00000120738	EGR1	early growth response 1 [Source:HGNC Symbol;Acc:HGNC:3238]	1958	response to ethanol	negative regulation of transcription from RNA polymerase II promoter; circadian rhythm			-0.371783	0.00207984	0.0283141	-0.337869	0.00278974	0.0288039	-0.390817	0.00111639	0.0206875	-0.335521	0.00162821	0.0102465	-0.203258	0.0018547	0.041847	-0.191393	0.00204594	0.0388231	0.241341	0.132825	0.803334	0.220922	0.154749	0.784872	0.447803	0.124457	0.445276	0.446731	0.115191	0.465973
ENSG00000166333	ILK	integrin linked kinase [Source:HGNC Symbol;Acc:HGNC:6040]	3611	protein phosphorylation; positive regulation of cell migration; cell cycle arrest; positive regulation of axon extension; platelet aggregation; peptidyl-serine phosphorylation; positive regulation of cell proliferation; cell junction assembly				0.200953	0.0872934	0.184766	0.243813	0.0329914	0.108738	0.373116	0.00112536	0.0206875	0.403182	0.000125628	0.00295414	0.105342	0.0977735	0.238303	0.128742	0.0409041	0.157978	0.319075	0.0409165	0.743933	0.365724	0.0173603	0.574659	0.364748	0.201339	0.504158	0.453661	0.109584	0.46126
ENSG00000170430	MGMT	O-6-methylguanine-DNA methyltransferase [Source:HGNC Symbol;Acc:HGNC:7059]	4255	response to ethanol; response to drug; response to toxic substance			Hepatocytes	-0.183365	0.130684	0.228839	-0.22176	0.0529762	0.140435	-0.384432	0.00112634	0.0206875	-0.38994	0.000216617	0.00381081	-0.11325	0.0838573	0.222801	-0.130119	0.038745	0.155175	0.295181	0.0622528	0.770375	0.301205	0.0512421	0.682706	0.559161	0.0515567	0.352675	0.522416	0.0647721	0.397508
ENSG00000121310	ECHDC2	enoyl-CoA hydratase domain containing 2 [Source:HGNC Symbol;Acc:HGNC:23408]	55268	fatty acid metabolic process			Hepatocytes	-0.11848	0.33061	0.362055	-0.1523	0.186237	0.269351	-0.384417	0.00112661	0.0206875	-0.366032	0.000548359	0.00584663	-0.0641951	0.329926	0.398885	-0.077188	0.223671	0.338227	0.233675	0.138994	0.804748	0.242387	0.118055	0.756576	0.613228	0.0313013	0.300114	0.667669	0.0175666	0.295502
ENSG00000141380	SS18	SS18 subunit of BAF chromatin remodeling complex [Source:HGNC Symbol;Acc:HGNC:11340]	6760	intracellular signal transduction; ephrin receptor signaling pathway; response to drug; cell morphogenesis	ephrin receptor signaling pathway			0.37477	0.00159154	0.0244837	0.390221	0.000495877	0.0129764	0.384301	0.00112874	0.0206875	0.382762	0.000288375	0.00432964	0.135336	0.0380851	0.156817	0.148295	0.0180773	0.10692	0.271306	0.0891602	0.77938	0.261361	0.0915664	0.718584	0.306189	0.293194	0.56048	0.337578	0.235264	0.554117
ENSG00000262814	MRPL12	mitochondrial ribosomal protein L12 [Source:HGNC Symbol;Acc:HGNC:10378]	6182					-0.117086	0.332457	0.362799	-0.179916	0.117711	0.211374	-0.381267	0.00112933	0.0206875	-0.39982	0.000144572	0.00315472	-0.0601589	0.35752	0.413236	-0.0877044	0.166281	0.2965	0.410938	0.00958149	0.632377	0.385824	0.0119292	0.563079	0.492301	0.0909144	0.410885	0.487029	0.0855039	0.426261
ENSG00000132463	GRSF1	G-rich RNA sequence binding factor 1 [Source:HGNC Symbol;Acc:HGNC:4610]	2926				monocytes	0.383754	0.00149194	0.023821	0.387138	0.000553204	0.0131676	0.391248	0.00113111	0.0206875	0.370353	0.00046598	0.0054047	0.217013	0.000871677	0.0288881	0.220162	0.000345629	0.0192621	-0.31572	0.0350781	0.727113	-0.401301	0.00882183	0.533526	-0.525536	0.0538615	0.358096	-0.643193	0.0223132	0.305717
ENSG00000170248	PDCD6IP	programmed cell death 6 interacting protein [Source:HGNC Symbol;Acc:HGNC:8766]	10015	protein transport	apoptotic process; protein transport			0.337378	0.0050611	0.0425205	0.359535	0.00141069	0.0210226	0.387075	0.00113973	0.0207792	0.389542	0.000220117	0.00385205	0.156048	0.0172404	0.110272	0.170246	0.00638038	0.0646727	0.273735	0.0808778	0.770751	0.260088	0.0931819	0.719375	0.658594	0.019881	0.27187	0.667697	0.0175617	0.295502
ENSG00000168303	MPLKIP	M-phase specific PLK1 interacting protein [Source:HGNC Symbol;Acc:HGNC:16002]	136647					-0.123387	0.300518	0.345013	-0.146625	0.203338	0.279204	-0.375862	0.00114383	0.0207882	-0.374259	0.000401452	0.00502007	-0.0383493	0.552843	0.499303	-0.0568048	0.371412	0.41969	0.39582	0.0117703	0.63842	0.413077	0.00695843	0.499304	0.404489	0.161485	0.480217	0.466983	0.0994055	0.442057
ENSG00000151790	TDO2	tryptophan 2,3-dioxygenase [Source:HGNC Symbol;Acc:HGNC:11708]	6999	small molecule metabolic process; oxidation-reduction process; cellular nitrogen compound metabolic process		*	Cholangiocytes | Hepatocytes	-0.256546	0.034514	0.11497	-0.270309	0.0177497	0.0776505	-0.38626	0.00115061	0.0208456	-0.358697	0.000719282	0.00659493	-0.128706	0.0503934	0.177469	-0.134884	0.0319952	0.139895	0.470986	0.00250905	0.579102	0.4614	0.00244563	0.457325	0.692616	0.015296	0.255827	0.681011	0.0153665	0.287023
ENSG00000109576	AADAT	aminoadipate aminotransferase [Source:HGNC Symbol;Acc:HGNC:17929]	51166	small molecule metabolic process; cellular nitrogen compound metabolic process			Hepatocytes	-0.292305	0.0131518	0.0699226	-0.357636	0.00150029	0.0214802	-0.37668	0.00116236	0.0209259	-0.427909	4.27346e-05	0.00207616	-0.149229	0.0195394	0.116599	-0.181373	0.00356739	0.0487704	0.287432	0.0705444	0.770375	0.277583	0.0728583	0.693084	0.153481	0.598002	0.684858	0.180053	0.527834	0.692221
ENSG00000244687	UBE2V1	ubiquitin conjugating enzyme E2 V1 [Source:HGNC Symbol;Acc:HGNC:12494]	7335	T cell receptor signaling pathway; toll-like receptor 9 signaling pathway; toll-like receptor 2 signaling pathway; positive regulation of NF-kappaB transcription factor activity; toll-like receptor 5 signaling pathway; toll-like receptor 10 signaling pathway; innate immune response; toll-like receptor TLR1:TLR2 signaling pathway; toll-like receptor TLR6:TLR2 signaling pathway; MyD88-dependent tol…			Erythroid cells | Plasma cells	0.270123	0.0168171	0.0789045	0.267296	0.0191012	0.0807528	0.360587	0.00116306	0.0209259	0.319689	0.00274996	0.0134488	0.177177	0.00348603	0.0546229	0.167116	0.00746461	0.0704708	0.162002	0.29097	0.845772	0.22507	0.147065	0.782669	0.49126	0.0761031	0.389835	0.554622	0.0496413	0.374067
ENSG00000146066	HIGD2A	HIG1 hypoxia inducible domain family member 2A [Source:HGNC Symbol;Acc:HGNC:28311]	192286	oxidation-reduction process	oxidation-reduction process			-0.341083	0.00418594	0.0383783	-0.313112	0.00576065	0.0418877	-0.382437	0.00117526	0.0209259	-0.334152	0.0017055	0.010522	-0.154511	0.0172842	0.11036	-0.146289	0.0197496	0.110809	0.173	0.270845	0.842326	0.176603	0.256286	0.822207	0.717472	0.0106774	0.23657	0.715868	0.0107082	0.254364
ENSG00000215712	TMEM242	transmembrane protein 242 [Source:HGNC Symbol;Acc:HGNC:17206]	729515					0.00957026	0.938009	0.596568	-0.0094166	0.935173	0.573224	-0.386014	0.00117648	0.0209259	-0.336871	0.00155509	0.00996061	-0.0165721	0.803404	0.583788	-0.0232149	0.715391	0.55481	0.253721	0.105031	0.797116	0.213435	0.169373	0.785315	0.52071	0.0663689	0.378332	0.491949	0.0823398	0.421773
ENSG00000148339	SLC25A25	solute carrier family 25 member 25 [Source:HGNC Symbol;Acc:HGNC:20663]	114789					-0.470868	6.37909e-05	0.00647658	-0.480248	1.2642e-05	0.00260783	-0.386421	0.00117683	0.0209259	-0.389917	0.000216819	0.00381081	-0.231227	0.000320269	0.0214175	-0.243037	6.81854e-05	0.0100502	-0.169897	0.285221	0.845772	-0.17016	0.274164	0.828115	-0.760747	0.00734342	0.222568	-0.78418	0.00501772	0.221624
ENSG00000140598	EFL1	elongation factor like GTPase 1 [Source:HGNC Symbol;Acc:HGNC:25789]	79631					0.176805	0.138632	0.235642	0.221987	0.0527282	0.140059	0.376838	0.00117748	0.0209259	0.386813	0.000245564	0.00404114	0.0654195	0.312811	0.38863	0.0869758	0.169866	0.298926	0.248515	0.122631	0.798269	0.213067	0.170117	0.785315	0.240521	0.412869	0.617837	0.209938	0.461495	0.667235
ENSG00000143248	RGS5	regulator of G protein signaling 5 [Source:HGNC Symbol;Acc:HGNC:10001]	8490				Smooth muscle cells	-0.462506	4.81936e-05	0.0057892	-0.43189	0.000102117	0.00652604	-0.37386	0.00118047	0.0209259	-0.328893	0.00203434	0.0115506	-0.21694	0.000500623	0.0246222	-0.207082	0.000803042	0.0279932	0.281616	0.0715495	0.770375	0.229578	0.139043	0.777162	0.731361	0.00923812	0.233757	0.671179	0.0169629	0.293231
ENSG00000060749	QSER1	glutamine and serine rich 1 [Source:HGNC Symbol;Acc:HGNC:26154]	79832					0.0298839	0.800505	0.55544	0.0549187	0.635031	0.48623	0.370619	0.0011928	0.0210608	0.324521	0.00235017	0.0124643	0.0144102	0.821827	0.589197	0.020496	0.747532	0.564921	-0.227506	0.138022	0.804454	-0.258501	0.0952281	0.720029	-0.494711	0.0748955	0.3887	-0.478359	0.0913134	0.433524
ENSG00000108830	RND2	Rho family GTPase 2 [Source:HGNC Symbol;Acc:HGNC:18315]	8153					-0.359899	0.000997798	0.0200636	-0.442791	6.53762e-05	0.00497836	-0.353243	0.00119539	0.0210608	-0.459425	9.56414e-06	0.00120129	-0.158765	0.00793201	0.0792125	-0.203767	0.000985165	0.0299576	0.191056	0.234983	0.834814	0.153715	0.323524	0.837809	0.659709	0.0224353	0.277505	0.620449	0.0276674	0.323511
ENSG00000198363	ASPH	aspartate beta-hydroxylase [Source:HGNC Symbol;Acc:HGNC:757]	444	negative regulation of cell proliferation; calcium ion transmembrane transport; ion transmembrane transport				0.132871	0.267887	0.327256	0.196157	0.0876626	0.180579	0.376713	0.00120708	0.0210806	0.408211	0.000101553	0.0026547	0.0646356	0.319518	0.39251	0.0940783	0.13727	0.271513	0.249224	0.117197	0.797116	0.196892	0.205253	0.804834	0.476327	0.0988926	0.419274	0.432019	0.127826	0.478561
ENSG00000171608	PIK3CD	phosphatidylinositol-4,5-bisphosphate 3-kinase catalytic subunit delta [Source:HGNC Symbol;Acc:HGNC:8977]	5293	signal transduction; platelet activation; phosphatidylinositol biosynthetic process; protein phosphorylation; phosphatidylinositol phosphorylation; positive regulation of cell migration; T cell receptor signaling pathway; B cell homeostasis; phospholipid metabolic process; B cell receptor signaling pathway; T cell differentiation; innate immune response; neutrophil chemotaxis; adaptive immune res…			Kupffer cells | dendritic cells | NK-cells | T-cells	0.160778	0.181183	0.26936	0.185482	0.106629	0.200303	0.378291	0.00120782	0.0210806	0.375465	0.000383257	0.00494658	0.0573592	0.379342	0.425136	0.0727066	0.251939	0.357665	0.453871	0.00342411	0.579102	0.436558	0.00424847	0.457325	0.795956	0.00477312	0.198588	0.756927	0.00684498	0.243153
ENSG00000135407	AVIL	advillin [Source:HGNC Symbol;Acc:HGNC:14188]	10677	cytoskeleton organization; positive regulation of neuron projection development				0.168084	0.163034	0.254255	0.145369	0.207271	0.281414	0.379187	0.00121063	0.0210806	0.320521	0.00267703	0.0132431	0.13416	0.0383048	0.157376	0.12215	0.0526746	0.176827	0.220751	0.155552	0.814915	0.219206	0.158015	0.784872	0.702287	0.0117701	0.242655	0.610162	0.0304261	0.329577
ENSG00000146094	DOK3	docking protein 3 [Source:HGNC Symbol;Acc:HGNC:24583]	79930				Kupffer cells | monocytes | Macrophages | Plasma cells | B-cells	0.401016	0.000787177	0.0178493	0.392633	0.000454867	0.0127613	0.385904	0.00121115	0.0210806	0.368198	0.000505518	0.00565935	0.207569	0.00136188	0.0360433	0.210821	0.000634915	0.0243086	0.398568	0.00896195	0.61284	0.388988	0.0112259	0.563079	0.709223	0.0104942	0.235137	0.753731	0.00709385	0.243153
ENSG00000250510	GPR162	G protein-coupled receptor 162 [Source:HGNC Symbol;Acc:HGNC:16693]	27239					-0.188782	0.125558	0.224512	-0.198713	0.0835447	0.176021	-0.388099	0.00121666	0.0211128	-0.359498	0.000698488	0.00654009	-0.0456304	0.496086	0.477478	-0.0578901	0.362303	0.415643	0.184626	0.233849	0.834814	0.20538	0.186218	0.798251	0.27155	0.335565	0.581261	0.310072	0.275916	0.580179
ENSG00000156463	SH3RF2	SH3 domain containing ring finger 2 [Source:HGNC Symbol;Acc:HGNC:26299]	153769					-0.193062	0.108121	0.207527	-0.170776	0.137814	0.228715	-0.378486	0.00122355	0.0211685	-0.312339	0.00347593	0.0152471	-0.110178	0.089869	0.22953	-0.105277	0.0958139	0.233047	0.263269	0.0848022	0.770751	0.327823	0.0335145	0.638058	0.550033	0.0467499	0.344811	0.622394	0.0271706	0.320903
ENSG00000143314	MRPL24	mitochondrial ribosomal protein L24 [Source:HGNC Symbol;Acc:HGNC:14037]	79590					0.00852357	0.944397	0.597986	-0.0619775	0.592127	0.470969	-0.381894	0.00123241	0.0212416	-0.399504	0.00014648	0.00316146	-0.0175794	0.790312	0.579908	-0.0488684	0.442182	0.452926	0.258113	0.10276	0.794713	0.219254	0.157923	0.784872	0.766144	0.00688289	0.222568	0.714635	0.010849	0.254364
ENSG00000165682	CLEC1B	C-type lectin domain family 1 member B [Source:HGNC Symbol;Acc:HGNC:24356]	51266			*	Kupffer cells | Macrophages | Erythroid cells | Hepatic stellate cells	-0.30032	0.0095729	0.0589552	-0.240412	0.0355782	0.112577	-0.369118	0.00123515	0.0212416	-0.265908	0.0134538	0.0321952	-0.121971	0.0538071	0.183685	-0.093826	0.13834	0.272077	0.283397	0.0755729	0.770375	0.251096	0.105244	0.73617	0.604865	0.0360795	0.317168	0.563039	0.046208	0.368215
ENSG00000177000	MTHFR	methylenetetrahydrofolate reductase [Source:HGNC Symbol;Acc:HGNC:7436]	4524	response to drug				0.260572	0.0280738	0.103363	0.156748	0.173581	0.259514	0.375667	0.00124031	0.0212477	0.211313	0.0509521	0.0716916	0.108848	0.0917732	0.230749	0.0643927	0.310649	0.389988	0.144149	0.354007	0.850281	0.0871985	0.576144	0.877049	0.358965	0.202712	0.504711	0.290265	0.307951	0.596476
ENSG00000112357	PEX7	peroxisomal biogenesis factor 7 [Source:HGNC Symbol;Acc:HGNC:8860]	5191	fatty acid beta-oxidation				-0.173111	0.148873	0.244037	-0.131122	0.255713	0.313183	-0.376704	0.00124297	0.0212477	-0.268785	0.0124476	0.0308927	-0.0939471	0.147632	0.28396	-0.0697204	0.272082	0.368859	0.385961	0.0111235	0.63842	0.294682	0.0566028	0.682706	0.621029	0.0250482	0.289536	0.569691	0.0436362	0.362553
ENSG00000148358	GPR107	G protein-coupled receptor 107 [Source:HGNC Symbol;Acc:HGNC:17830]	57720					0.229136	0.0596884	0.153991	0.23462	0.0403758	0.12065	0.383685	0.00124825	0.0212477	0.352402	0.00090339	0.0074795	0.0813826	0.219078	0.331844	0.0878098	0.165767	0.295885	0.321509	0.0440613	0.754853	0.283	0.0673449	0.6834	0.531824	0.0671622	0.379094	0.512831	0.0699365	0.406912
ENSG00000117385	P3H1	prolyl 3-hydroxylase 1 [Source:HGNC Symbol;Acc:HGNC:19316]	64175					0.231245	0.0585139	0.152465	0.236996	0.0383467	0.117061	0.385414	0.00125025	0.0212477	0.358863	0.000714928	0.00659493	0.121772	0.0657349	0.200022	0.126241	0.0450816	0.164748	-0.215603	0.177981	0.816199	-0.21978	0.156917	0.784872	-0.372937	0.199656	0.503098	-0.367576	0.195904	0.530067
ENSG00000101444	AHCY	adenosylhomocysteinase [Source:HGNC Symbol;Acc:HGNC:343]	191	small molecule metabolic process; cellular nitrogen compound metabolic process; xenobiotic metabolic process; one-carbon metabolic process; sulfur amino acid metabolic process; methylation; response to nutrient				-0.183122	0.134069	0.2316	-0.219604	0.0553752	0.143489	-0.383584	0.00126355	0.0214105	-0.386819	0.000245507	0.00404114	-0.0973939	0.140906	0.279825	-0.118837	0.059567	0.18762	-0.311473	0.0504864	0.76927	-0.29478	0.0565187	0.682706	-0.572651	0.0476089	0.345023	-0.529493	0.0611607	0.390889
ENSG00000154723	ATP5PF	ATP synthase peripheral stalk subunit F6 [Source:HGNC Symbol;Acc:HGNC:847]	522					-0.134305	0.269453	0.32775	-0.146127	0.204893	0.279861	-0.380427	0.00126909	0.0214413	-0.34822	0.00104841	0.00807747	-0.0700653	0.287095	0.374289	-0.0748227	0.2383	0.348686	0.210842	0.182726	0.819411	0.227489	0.142718	0.782191	0.635624	0.0255897	0.290536	0.654438	0.0200112	0.302525
ENSG00000108176	DNAJC12	DnaJ heat shock protein family (Hsp40) member C12 [Source:HGNC Symbol;Acc:HGNC:28908]	56521				Hepatocytes	-0.263556	0.0217754	0.0904341	-0.333646	0.00316971	0.0310392	-0.363404	0.00127286	0.0214421	-0.413014	8.26215e-05	0.00252804	-0.14384	0.0206225	0.119089	-0.173868	0.0053019	0.0596305	0.29543	0.063474	0.770375	0.259372	0.0941015	0.719375	0.298223	0.305501	0.566832	0.246662	0.386658	0.635166
ENSG00000106069	CHN2	chimerin 2 [Source:HGNC Symbol;Acc:HGNC:1944]	1124					-0.339335	0.00405851	0.0378793	-0.379111	0.000732144	0.01519	-0.376556	0.0012801	0.0214614	-0.402601	0.000128732	0.00297024	-0.166923	0.00927916	0.0864419	-0.187532	0.00254412	0.0418685	-0.275228	0.0742877	0.770375	-0.310348	0.0444386	0.675607	-0.372625	0.185045	0.493572	-0.465646	0.100392	0.44252
ENSG00000114353	GNAI2	G protein subunit alpha i2 [Source:HGNC Symbol;Acc:HGNC:4385]	2771	blood coagulation; signal transduction; platelet activation; intracellular signal transduction; synaptic transmission; positive regulation of cell proliferation; cell cycle; metabolic process	blood coagulation			0.421297	0.000251427	0.0105688	0.403149	0.00030997	0.0105811	0.372266	0.00128146	0.0214614	0.343616	0.00123239	0.00888136	0.262974	1.8568e-05	0.00651698	0.255538	2.57742e-05	0.00737367	0.119949	0.453115	0.864462	0.125156	0.421919	0.850034	0.577935	0.0443748	0.340867	0.591279	0.0360953	0.342487
ENSG00000183011	NAA38	N-alpha-acetyltransferase 38, NatC auxiliary subunit [Source:HGNC Symbol;Acc:HGNC:28212]	84316					-0.186537	0.125696	0.224529	-0.218009	0.0572066	0.145796	-0.381753	0.00128989	0.02154	-0.383701	0.000277881	0.00422131	-0.108001	0.100959	0.241048	-0.125227	0.0468732	0.168027	-0.207935	0.180723	0.817782	-0.192163	0.216442	0.806617	-0.392446	0.16397	0.482025	-0.407203	0.151504	0.503955
ENSG00000135390	ATP5MC2	ATP synthase membrane subunit c locus 2 [Source:HGNC Symbol;Acc:HGNC:842]	517					-0.20664	0.0940085	0.193564	-0.189233	0.0996305	0.193606	-0.386935	0.0013007	0.0215973	-0.329951	0.00196391	0.0113382	-0.0894036	0.181811	0.306033	-0.0864192	0.172643	0.301401	-0.30461	0.0473503	0.765133	-0.358747	0.0196898	0.580485	-0.543673	0.051349	0.352656	-0.597535	0.0341261	0.336697
ENSG00000100348	TXN2	thioredoxin 2 [Source:HGNC Symbol;Acc:HGNC:17772]	25828	oxidation-reduction process; response to nutrient; response to reactive oxygen species; response to drug				-0.134447	0.265547	0.325874	-0.198438	0.0839809	0.176441	-0.376974	0.00130082	0.0215973	-0.410111	9.36277e-05	0.00261984	-0.0794371	0.22374	0.334473	-0.109279	0.0836611	0.218512	0.190746	0.231384	0.834553	0.180665	0.24543	0.819377	0.846215	0.00282045	0.16615	0.846982	0.00235101	0.169912
ENSG00000101353	MROH8	maestro heat like repeat family member 8 [Source:HGNC Symbol;Acc:HGNC:16125]	140699					-0.217654	0.0758554	0.172985	-0.191122	0.0962443	0.189578	-0.384201	0.00132639	0.0219586	-0.319457	0.00277065	0.0135115	-0.104239	0.116816	0.256684	-0.097448	0.123573	0.259651	0.0927808	0.552826	0.874639	0.132625	0.394653	0.843919	0.395685	0.161387	0.480217	0.373343	0.188916	0.525466
ENSG00000161328	LRRC56	leucine rich repeat containing 56 [Source:HGNC Symbol;Acc:HGNC:25430]	115399					-0.407607	0.000562859	0.0151166	-0.375741	0.00082193	0.0163049	-0.379472	0.00133136	0.0219777	-0.329397	0.0020005	0.0114595	-0.228278	0.000344874	0.0219045	-0.216792	0.000431951	0.0205799	-0.346515	0.021558	0.684653	-0.380809	0.0131229	0.563079	-0.540033	0.0494786	0.349594	-0.608659	0.0308477	0.330431
ENSG00000182512	GLRX5	glutaredoxin 5 [Source:HGNC Symbol;Acc:HGNC:20134]	51218	oxidation-reduction process			Erythroid cells	-0.21173	0.0818978	0.178841	-0.236998	0.0383448	0.117061	-0.380905	0.00133984	0.0220545	-0.37759	0.000353014	0.00478957	-0.0657487	0.320847	0.39382	-0.0838434	0.185931	0.311615	0.323542	0.0400501	0.743933	0.318404	0.0390822	0.652252	0.616173	0.0310741	0.299139	0.624693	0.026593	0.31841
ENSG00000168118	RAB4A	RAB4A, member RAS oncogene family [Source:HGNC Symbol;Acc:HGNC:9781]	5867					-0.178471	0.148734	0.244003	-0.187525	0.10277	0.196619	-0.385557	0.00134985	0.0220697	-0.35323	0.000876943	0.00731937	-0.0833814	0.213138	0.327594	-0.0907522	0.151889	0.283565	0.273437	0.0830082	0.770751	0.22994	0.138413	0.77636	0.325172	0.258596	0.54212	0.270414	0.342392	0.615522
ENSG00000181588	MEX3D	mex-3 RNA binding family member D [Source:HGNC Symbol;Acc:HGNC:16734]	399664					0.0849862	0.485508	0.440135	0.10949	0.343103	0.363376	0.378283	0.00135413	0.0220697	0.364705	0.000576218	0.00597061	0.0566456	0.389885	0.430576	0.0690542	0.27672	0.372466	0.533303	0.000548339	0.453152	0.525321	0.000507522	0.309156	0.738417	0.00940207	0.233757	0.713619	0.0109662	0.254364
ENSG00000123453	SARDH	sarcosine dehydrogenase [Source:HGNC Symbol;Acc:HGNC:10536]	1757	oxidation-reduction process	oxidation-reduction process	*	Hepatocytes	-0.318288	0.00625349	0.0474158	-0.386091	0.00057402	0.0133789	-0.368615	0.0013552	0.0220697	-0.425888	4.68168e-05	0.00213356	-0.161035	0.0107819	0.0911513	-0.19417	0.00174395	0.0365197	0.456007	0.00382694	0.591752	0.41168	0.00715949	0.507628	0.740099	0.0101027	0.235137	0.700382	0.0125984	0.270205
ENSG00000099917	MED15	mediator complex subunit 15 [Source:HGNC Symbol;Acc:HGNC:14248]	51586					0.108072	0.384659	0.392548	0.134256	0.244446	0.306314	0.386169	0.00135686	0.0220697	0.354416	0.00084026	0.00715231	0.0472806	0.482426	0.471558	0.0597937	0.346662	0.407184	0.276022	0.0835387	0.770751	0.262867	0.0896836	0.714232	0.72851	0.0110819	0.237457	0.722654	0.00996132	0.253076
ENSG00000168874	ATOH8	atonal bHLH transcription factor 8 [Source:HGNC Symbol;Acc:HGNC:24126]	84913				Endothelial cells | Hepatocytes	-0.317925	0.00846205	0.055599	-0.337793	0.00279619	0.0288039	-0.381612	0.00136109	0.0220697	-0.382309	0.000293569	0.00435681	-0.172784	0.00816265	0.080762	-0.184897	0.00294421	0.0442187	-0.41089	0.00706775	0.605959	-0.452554	0.00298796	0.457325	-0.527735	0.0593719	0.36516	-0.584351	0.0383862	0.346789
ENSG00000232838	PET117	PET117 cytochrome c oxidase chaperone [Source:HGNC Symbol;Acc:HGNC:40045]	100303755					-0.169252	0.170143	0.259935	-0.187736	0.102378	0.196182	-0.384311	0.00136532	0.0220697	-0.363036	0.000613092	0.00615039	-0.0540548	0.419745	0.444602	-0.0680961	0.283483	0.376142	0.516682	0.000911022	0.453152	0.520486	0.000576212	0.309156	0.945418	0.000826154	0.132253	0.985019	0.000355674	0.127109
ENSG00000116514	RNF19B	ring finger protein 19B [Source:HGNC Symbol;Acc:HGNC:26886]	127544	adaptive immune response; protein ubiquitination involved in ubiquitin-dependent protein catabolic process				0.0869466	0.481291	0.438192	0.125139	0.278197	0.326911	0.382966	0.00136843	0.0220697	0.369614	0.000479215	0.00549315	-0.00738855	0.912051	0.614695	0.0179285	0.778287	0.573943	-0.203435	0.162007	0.814915	-0.285853	0.0645798	0.682706	-0.341755	0.19613	0.500458	-0.445694	0.116049	0.466863
ENSG00000132478	UNK	unk zinc finger [Source:HGNC Symbol;Acc:HGNC:29369]	85451					0.343731	0.00404173	0.0378793	0.370795	0.00097194	0.01776	0.379059	0.00137141	0.0220697	0.39665	0.000164816	0.00337132	0.168224	0.00962576	0.0878478	0.186115	0.00275269	0.043094	0.386301	0.0145236	0.639037	0.392971	0.0103921	0.563079	0.712627	0.0129772	0.248768	0.71767	0.0105052	0.254306
ENSG00000138075	ABCG5	ATP binding cassette subfamily G member 5 [Source:HGNC Symbol;Acc:HGNC:13886]	64240	small molecule metabolic process; cholesterol efflux; excretion; response to nutrient; cholesterol homeostasis; response to drug		*	Hepatocytes	-0.23269	0.0449678	0.132378	-0.306528	0.00692059	0.0461586	-0.363394	0.00137859	0.0221235	-0.417754	6.72028e-05	0.00242013	-0.13385	0.0327764	0.148028	-0.165257	0.00818268	0.0736574	0.118256	0.462816	0.866179	0.0864459	0.579447	0.877498	0.508708	0.0797738	0.397395	0.480885	0.0895895	0.432013
ENSG00000127084	FGD3	FYVE, RhoGEF and PH domain containing 3 [Source:HGNC Symbol;Acc:HGNC:16027]	89846	actin cytoskeleton organization; regulation of cell shape; cytoskeleton organization; positive regulation of GTPase activity; small GTPase mediated signal transduction; regulation of small GTPase mediated signal transduction; positive regulation of apoptotic process			T-cells | dendritic cells | NK-cells	0.145294	0.216061	0.293415	0.242222	0.0341814	0.110571	0.365056	0.00138322	0.0221361	0.444162	2.01016e-05	0.00146078	0.0970655	0.125773	0.265772	0.143294	0.0224926	0.118295	0.524031	0.00082946	0.453152	0.499192	0.000991864	0.370583	0.778282	0.00683801	0.222568	0.760895	0.00654685	0.242701
ENSG00000165209	STRBP	spermatid perinuclear RNA binding protein [Source:HGNC Symbol;Acc:HGNC:16462]	55342					0.227841	0.0588078	0.152879	0.198207	0.0843475	0.176441	0.376694	0.00139432	0.0221473	0.293232	0.00622617	0.020753	0.169244	0.00883218	0.0848092	0.149026	0.0174992	0.105556	0.234953	0.13885	0.804748	0.204426	0.188292	0.799509	0.298475	0.301992	0.565719	0.305559	0.28301	0.584041
ENSG00000197102	DYNC1H1	dynein cytoplasmic 1 heavy chain 1 [Source:HGNC Symbol;Acc:HGNC:2961]	1778	antigen processing and presentation of exogenous peptide antigen via MHC class II; metabolic process				0.294706	0.0149985	0.0743511	0.300371	0.00818737	0.0504313	0.380967	0.00139748	0.0221473	0.35426	0.000845002	0.00716503	0.143955	0.0285968	0.137845	0.147255	0.0189286	0.109154	0.345098	0.0309507	0.71547	0.324759	0.0352472	0.644023	0.732114	0.0112922	0.237457	0.730074	0.0091973	0.253076
ENSG00000108924	HLF	HLF transcription factor, PAR bZIP family member [Source:HGNC Symbol;Acc:HGNC:4977]	3131				Hepatocytes	-0.256353	0.0325961	0.111945	-0.283786	0.0126669	0.0641826	-0.375746	0.00139791	0.0221473	-0.378722	0.000337829	0.00471757	-0.117816	0.0705221	0.205125	-0.132094	0.0358147	0.148494	-0.0741337	0.637468	0.885285	-0.0504307	0.746601	0.896206	-0.503019	0.0757814	0.389271	-0.437837	0.122708	0.471433
ENSG00000128185	DGCR6L	DiGeorge syndrome critical region gene 6 like [Source:HGNC Symbol;Acc:HGNC:18551]	85359					-0.16333	0.179849	0.268373	-0.194637	0.0901871	0.183365	-0.378423	0.00139929	0.0221473	-0.371774	0.00044147	0.00525126	-0.0864577	0.189561	0.312017	-0.101364	0.109001	0.245898	0.249438	0.115041	0.797116	0.219761	0.156954	0.784872	0.630177	0.0272734	0.294326	0.598664	0.0337806	0.336697
ENSG00000130309	COLGALT1	collagen beta(1-O)galactosyltransferase 1 [Source:HGNC Symbol;Acc:HGNC:26182]	79709	extracellular matrix organization; metabolic process				0.494523	2.53449e-05	0.00453583	0.47697	1.4702e-05	0.00291083	0.381426	0.00140524	0.0221804	0.361314	0.000653371	0.00636428	0.273271	1.62084e-05	0.00638937	0.269897	7.77572e-06	0.00360704	0.157582	0.318867	0.845772	0.0989298	0.525826	0.867256	0.343422	0.230976	0.525736	0.31	0.276028	0.580286
ENSG00000137106	GRHPR	glyoxylate and hydroxypyruvate reductase [Source:HGNC Symbol;Acc:HGNC:4570]	9380	small molecule metabolic process; oxidation-reduction process; cellular nitrogen compound metabolic process; excretion			Hepatocytes	-0.278333	0.0202633	0.0872173	-0.322136	0.00445161	0.03676	-0.3759	0.0014212	0.022371	-0.397071	0.000161985	0.00337132	-0.147121	0.0234362	0.124852	-0.167906	0.00717645	0.0687793	0.217266	0.167609	0.816199	0.204193	0.188801	0.799509	0.482831	0.0903634	0.410885	0.509719	0.0716828	0.409019
ENSG00000182405	PGBD4	piggyBac transposable element derived 4 [Source:HGNC Symbol;Acc:HGNC:19401]	161779					-0.264116	0.0247747	0.0962431	-0.241307	0.0348816	0.111185	-0.367984	0.00144448	0.0226756	-0.318008	0.00290278	0.0139446	-0.130478	0.0408815	0.161271	-0.124014	0.0490943	0.171119	0.305024	0.0568581	0.770375	0.27249	0.0783674	0.700197	0.0288117	0.921893	0.766522	0.0115571	0.967712	0.805848
ENSG00000170088	TMEM192	transmembrane protein 192 [Source:HGNC Symbol;Acc:HGNC:26775]	201931					-0.167874	0.172009	0.261949	-0.204255	0.0751463	0.167492	-0.380769	0.00145449	0.0227481	-0.379738	0.000324711	0.0046193	-0.0815181	0.220773	0.332651	-0.102616	0.10464	0.242266	-0.246191	0.104329	0.797116	-0.203922	0.189394	0.799971	-0.301643	0.275072	0.549359	-0.268476	0.345881	0.617841
ENSG00000159335	PTMS	parathymosin [Source:HGNC Symbol;Acc:HGNC:9629]	5763					-0.2951	0.0142072	0.0722692	-0.327071	0.00385412	0.0341092	-0.377111	0.00146043	0.0227481	-0.390178	0.000214543	0.00380394	-0.154795	0.0175658	0.111034	-0.171863	0.00587696	0.0623398	0.366403	0.0175741	0.665926	0.365447	0.0174481	0.574659	0.834372	0.00264269	0.161843	0.893998	0.00128014	0.143307
ENSG00000213563	C8orf82	chromosome 8 open reading frame 82 [Source:HGNC Symbol;Acc:HGNC:33826]	414919					-0.22682	0.05774	0.151473	-0.287221	0.0115947	0.061445	-0.371962	0.00146094	0.0227481	-0.407489	0.000104722	0.00269648	-0.137332	0.0332394	0.14885	-0.164017	0.00869459	0.0752304	0.1701	0.291324	0.845772	0.147851	0.342422	0.843033	0.327887	0.262436	0.543847	0.300654	0.290859	0.587938
ENSG00000163825	RTP3	receptor transporter protein 3 [Source:HGNC Symbol;Acc:HGNC:15572]	83597			*	Hepatocytes	-0.167496	0.162773	0.254069	-0.216283	0.0592452	0.148318	-0.371562	0.00146653	0.0227736	-0.390404	0.000212601	0.00380394	-0.124062	0.0548242	0.184892	-0.143193	0.0225903	0.118697	0.250748	0.117441	0.797116	0.237434	0.125861	0.766034	0.405149	0.164201	0.482025	0.414161	0.144556	0.496413
ENSG00000270885	RASL10B	RAS like family 10 member B [Source:HGNC Symbol;Acc:HGNC:30295]	91608					-0.186853	0.128699	0.227184	-0.18239	0.112679	0.206786	-0.380817	0.00148437	0.0228905	-0.339718	0.00141056	0.00943381	-0.0808005	0.225776	0.335728	-0.0849483	0.180143	0.306821	-0.314623	0.0338487	0.725558	-0.338484	0.0280326	0.615781	-0.514786	0.0564814	0.362048	-0.60717	0.0312707	0.331808
ENSG00000205544	TMEM256	transmembrane protein 256 [Source:HGNC Symbol;Acc:HGNC:28618]	254863				Hepatocytes	-0.185336	0.128545	0.227184	-0.206372	0.0721225	0.164487	-0.377498	0.00148796	0.0228905	-0.363933	0.000593012	0.00602342	-0.0898092	0.174021	0.302054	-0.100642	0.111585	0.248577	0.191137	0.235509	0.834814	0.163759	0.292738	0.831819	0.599558	0.0388234	0.323933	0.567067	0.0446361	0.365459
ENSG00000011021	CLCN6	chloride voltage-gated channel 6 [Source:HGNC Symbol;Acc:HGNC:2024]	1185	signal transduction; chloride transport; ion transmembrane transport				0.109341	0.356181	0.376726	0.133002	0.248913	0.309504	0.365318	0.00148884	0.0228905	0.358112	0.00073481	0.00662932	0.0476683	0.457604	0.461108	0.0598809	0.345955	0.407184	-0.275652	0.0775367	0.770375	-0.286893	0.0635956	0.682706	-0.0952523	0.739097	0.725511	-0.095113	0.738961	0.7595
ENSG00000136457	CHAD	chondroadherin [Source:HGNC Symbol;Acc:HGNC:1909]	1101					-0.314324	0.00771836	0.0530099	-0.369587	0.00101219	0.0181003	-0.370187	0.00148995	0.0228905	-0.414764	7.65824e-05	0.00247704	-0.144036	0.0248841	0.128359	-0.174395	0.00515913	0.0589216	-0.252211	0.117658	0.797116	-0.254462	0.100594	0.729458	-0.394369	0.178645	0.489693	-0.385824	0.174416	0.520131
ENSG00000088766	CRLS1	cardiolipin synthase 1 [Source:HGNC Symbol;Acc:HGNC:16148]	54675	small molecule metabolic process			Hepatocytes	-0.259646	0.029566	0.10674	-0.262143	0.0216169	0.0861393	-0.371819	0.00149473	0.0229027	-0.345779	0.00114258	0.00854059	-0.120857	0.0621529	0.194857	-0.125142	0.0470265	0.168196	0.41571	0.00747945	0.605959	0.343369	0.0257872	0.608675	0.385531	0.178452	0.489672	0.346062	0.223613	0.550046
ENSG00000145555	MYO10	myosin X [Source:HGNC Symbol;Acc:HGNC:7593]	4651	Fc-gamma receptor signaling pathway involved in phagocytosis; regulation of cell shape; axon guidance; innate immune response; metabolic process				0.0734507	0.546861	0.463816	0.114116	0.322997	0.352311	0.375028	0.00150168	0.0229482	0.377982	0.000347692	0.00476206	0.0163749	0.804115	0.583933	0.0391217	0.538635	0.493013	0.234072	0.146594	0.81233	0.223823	0.149344	0.782669	0.176245	0.549198	0.668981	0.186456	0.513229	0.686477
ENSG00000132570	PCBD2	pterin-4 alpha-carbinolamine dehydratase 2 [Source:HGNC Symbol;Acc:HGNC:24474]	84105	oxidation-reduction process; protein homotetramerization				-0.227124	0.0633935	0.159473	-0.259147	0.0232064	0.0900003	-0.379546	0.00150729	0.022973	-0.380473	0.000315502	0.00453843	-0.157632	0.0165363	0.107837	-0.173524	0.00539689	0.0599142	0.248378	0.113622	0.797116	0.224993	0.147206	0.782669	0.598227	0.0348398	0.31345	0.5704	0.0433692	0.361593
ENSG00000251685	UGT2B27P	UDP glucuronosyltransferase family 2 member B27, pseudogene [Source:HGNC Symbol;Acc:HGNC:12551]	101929773			*		-0.263261	0.0271366	0.101381	-0.32853	0.00369182	0.0332677	-0.3707	0.00152788	0.0231514	-0.420963	5.83324e-05	0.00224178	-0.138762	0.0314825	0.145017	-0.173289	0.00546253	0.0602075	-0.354985	0.023914	0.684653	-0.380712	0.0131469	0.563079	-0.332158	0.249568	0.53697	-0.38818	0.171772	0.518142
ENSG00000131781	FMO5	flavin containing dimethylaniline monoxygenase 5 [Source:HGNC Symbol;Acc:HGNC:3773]	2330	oxidation-reduction process; drug metabolic process		*	Cholangiocytes | Hepatocytes	-0.314267	0.00768878	0.0530099	-0.363357	0.00124488	0.0199687	-0.369129	0.0015287	0.0231514	-0.396741	0.000164203	0.00337132	-0.153721	0.0163707	0.10765	-0.176307	0.00466989	0.056137	-0.323566	0.0396163	0.743933	-0.309886	0.0447633	0.675607	-0.264461	0.358972	0.591838	-0.303172	0.286812	0.585879
ENSG00000225697	SLC26A6	solute carrier family 26 member 6 [Source:HGNC Symbol;Acc:HGNC:14472]	65010	chloride transport; chloride transmembrane transport				0.271098	0.0240967	0.0951574	0.255852	0.0250686	0.0938599	0.374079	0.00153177	0.0231514	0.342093	0.00129941	0.00911671	0.209927	0.00103756	0.0319506	0.204475	0.000943354	0.0294863	-0.329309	0.0312653	0.716293	-0.325892	0.0345982	0.643484	-0.347131	0.215241	0.515391	-0.413886	0.144826	0.496694
ENSG00000176915	ANKLE2	ankyrin repeat and LEM domain containing 2 [Source:HGNC Symbol;Acc:HGNC:29101]	23141					0.232779	0.0578506	0.151552	0.221647	0.053099	0.140435	0.380274	0.00153507	0.0231514	0.335956	0.00160433	0.0101373	0.0679498	0.309676	0.385991	0.070103	0.269443	0.367612	0.24723	0.115583	0.797116	0.175646	0.258888	0.824053	0.705706	0.0124086	0.246801	0.614	0.0293706	0.327041
ENSG00000161202	DVL3	dishevelled segment polarity protein 3 [Source:HGNC Symbol;Acc:HGNC:3087]	1857	intracellular signal transduction; canonical Wnt signaling pathway; response to drug				0.300777	0.0122446	0.06745	0.309514	0.00637106	0.044637	0.37473	0.00154281	0.0232074	0.360884	0.000663814	0.00640166	0.141223	0.0304603	0.142538	0.147344	0.0188543	0.109154	0.417431	0.00855783	0.61284	0.410339	0.00735742	0.507758	0.507437	0.0816966	0.400077	0.51014	0.0714444	0.408521
ENSG00000063854	HAGH	hydroxyacylglutathione hydrolase [Source:HGNC Symbol;Acc:HGNC:4805]	3029				Erythroid cells	-0.234085	0.0470694	0.13566	-0.308219	0.00660444	0.0452782	-0.365377	0.00154854	0.0232108	-0.417543	6.78294e-05	0.00242574	-0.11683	0.0674686	0.202206	-0.150975	0.0160353	0.10067	0.33194	0.0267939	0.688708	0.364918	0.0176168	0.574659	0.5401	0.0478371	0.345525	0.647239	0.0214602	0.305717
ENSG00000176209	SMIM19	small integral membrane protein 19 [Source:HGNC Symbol;Acc:HGNC:25166]	114926					-0.353718	0.00285982	0.0328377	-0.366411	0.00112535	0.019187	-0.372716	0.00155109	0.0232108	-0.372212	0.000434161	0.00521171	-0.159298	0.0137897	0.100432	-0.168556	0.00694693	0.0679249	0.300009	0.0578603	0.770375	0.246863	0.111328	0.744062	0.581317	0.0426645	0.335866	0.535774	0.0580951	0.386025
ENSG00000088826	SMOX	spermine oxidase [Source:HGNC Symbol;Acc:HGNC:15862]	54498		small molecule metabolic process		Erythroid cells | Macrophages	0.456888	6.69531e-05	0.00647658	0.476214	1.52192e-05	0.00292953	0.367006	0.00156279	0.0232388	0.381293	0.000305523	0.00444456	0.200544	0.00145885	0.0372918	0.212343	0.000576216	0.0235239	-0.313721	0.0481198	0.765634	-0.272064	0.0788428	0.700197	-0.680567	0.0176611	0.267303	-0.609802	0.0305265	0.329577
ENSG00000118508	RAB32	RAB32, member RAS oncogene family [Source:HGNC Symbol;Acc:HGNC:9772]	10981	intracellular protein transport			Kupffer cells	0.253481	0.0325412	0.11181	0.313444	0.00570701	0.0416287	0.367844	0.00156437	0.0232388	0.416205	7.19194e-05	0.00247704	0.0949873	0.141442	0.280128	0.131201	0.0371157	0.151273	0.30467	0.0520627	0.76927	0.327789	0.033533	0.638058	0.619583	0.0291294	0.29904	0.627409	0.025924	0.316386
ENSG00000125249	RAP2A	RAP2A, member of RAS oncogene family [Source:HGNC Symbol;Acc:HGNC:9861]	5911					0.0440255	0.714887	0.52483	0.125519	0.27673	0.32619	0.369127	0.00156675	0.0232388	0.417876	6.68436e-05	0.00242013	0.0100274	0.877824	0.605738	0.0517526	0.415627	0.441188	0.184858	0.253706	0.841179	0.181997	0.241943	0.818437	0.794165	0.00598188	0.217894	0.781778	0.00515925	0.222806
ENSG00000256162	SMLR1	small leucine rich protein 1 [Source:HGNC Symbol;Acc:HGNC:44670]	100507203			*	Hepatocytes	-0.265755	0.0275417	0.102244	-0.307186	0.00679612	0.045901	-0.37426	0.00157117	0.0232388	-0.38871	0.000227601	0.00392005	-0.138012	0.0346136	0.150552	-0.15819	0.011497	0.0840865	-0.125546	0.425195	0.858648	-0.052475	0.736697	0.894373	-0.672174	0.0170648	0.265047	-0.565951	0.0450673	0.366165
ENSG00000172500	FIBP	FGF1 intracellular binding protein [Source:HGNC Symbol;Acc:HGNC:3705]	9158	platelet aggregation				0.241151	0.0474957	0.136379	0.263556	0.0209002	0.0847453	0.376602	0.00157313	0.0232388	0.368021	0.0005089	0.00567254	0.154795	0.0181646	0.112483	0.164267	0.00858936	0.0748399	0.207255	0.196397	0.824621	0.212543	0.171181	0.785378	0.308486	0.290371	0.559026	0.351841	0.215913	0.54577
ENSG00000120314	WDR55	WD repeat domain 55 [Source:HGNC Symbol;Acc:HGNC:25971]	54853					0.396142	0.000985702	0.0200148	0.36034	0.00137421	0.0206566	0.379363	0.00157902	0.0232526	0.321772	0.0025707	0.0130386	0.202398	0.00193365	0.041847	0.188769	0.00237373	0.0409917	0.301681	0.058969	0.770375	0.295002	0.0563287	0.682706	0.978121	0.000556075	0.132253	0.949082	0.000599766	0.1278
ENSG00000100580	TMED8	transmembrane p24 trafficking protein family member 8 [Source:HGNC Symbol;Acc:HGNC:18633]	283578		transport			0.343581	0.00285058	0.032784	0.362398	0.00128474	0.0201597	0.361233	0.00158542	0.0232526	0.372245	0.000433619	0.00521171	0.165853	0.00810762	0.08043	0.175871	0.00477761	0.0564623	-0.145239	0.360617	0.851683	-0.154807	0.32008	0.83707	-0.681553	0.0165881	0.262355	-0.678819	0.0157107	0.287023
ENSG00000175274	TP53I11	tumor protein p53 inducible protein 11 [Source:HGNC Symbol;Acc:HGNC:16842]	9537	negative regulation of cell proliferation				0.249272	0.0389785	0.122487	0.251899	0.0274691	0.0980174	0.373801	0.00158618	0.0232526	0.343399	0.00124172	0.00888136	0.13867	0.0336658	0.14885	0.139529	0.0263974	0.128267	0.210836	0.177494	0.816199	0.191783	0.217361	0.80762	0.425752	0.133216	0.454082	0.341412	0.229947	0.551765
ENSG00000100714	MTHFD1	methylenetetrahydrofolate dehydrogenase, cyclohydrolase and formyltetrahydrofolate synthetase 1 [Source:HGNC Symbol;Acc:HGNC:7432]	4522	small molecule metabolic process; oxidation-reduction process; one-carbon metabolic process			Hepatocytes	-0.279105	0.0196092	0.0852698	-0.326762	0.00388933	0.0342886	-0.371303	0.00159491	0.0233045	-0.401491	0.000134847	0.00304575	-0.12735	0.0501017	0.177341	-0.152368	0.0150542	0.0971525	0.39411	0.0113334	0.63842	0.351856	0.022249	0.589408	0.932027	0.000830568	0.132253	0.888082	0.00138461	0.146996
ENSG00000166510	CCDC68	coiled-coil domain containing 68 [Source:HGNC Symbol;Acc:HGNC:24350]	80323					-0.415432	0.000603987	0.0153953	-0.353558	0.00171037	0.0229179	-0.382699	0.00159916	0.0233045	-0.287439	0.00737585	0.0228967	-0.184805	0.0052946	0.0655466	-0.161982	0.0095962	0.0785479	0.281617	0.0654583	0.770375	0.271824	0.0791115	0.700197	0.660512	0.0166082	0.262355	0.667257	0.0176387	0.296194
ENSG00000135940	COX5B	cytochrome c oxidase subunit 5B [Source:HGNC Symbol;Acc:HGNC:2269]	1329	small molecule metabolic process; respiratory electron transport chain; cellular metabolic process; hydrogen ion transmembrane transport				-0.0834124	0.491799	0.441567	-0.120154	0.297913	0.339264	-0.371194	0.00160587	0.0233045	-0.364672	0.000576908	0.00597061	-0.0520258	0.427882	0.448094	-0.067235	0.289653	0.379833	-0.145487	0.36126	0.851683	-0.107106	0.492113	0.858225	-0.481142	0.0945033	0.4136	-0.453459	0.109745	0.461506
ENSG00000243056	EIF4EBP3	eukaryotic translation initiation factor 4E binding protein 3 [Source:HGNC Symbol;Acc:HGNC:3290]	8637					-0.228277	0.0609764	0.155923	-0.223546	0.0510538	0.13819	-0.375866	0.00161035	0.0233045	-0.338349	0.00147845	0.00969333	-0.123526	0.0609474	0.192571	-0.123538	0.0499882	0.172717	-0.142285	0.379268	0.854871	-0.127283	0.414044	0.848016	-0.411953	0.159497	0.478283	-0.401817	0.157051	0.508828
ENSG00000178096	BOLA1	bolA family member 1 [Source:HGNC Symbol;Acc:HGNC:24263]	51027					-0.247449	0.0399946	0.124307	-0.290331	0.0106932	0.0585793	-0.372322	0.00161644	0.0233045	-0.396646	0.000164848	0.00337132	-0.0869744	0.185211	0.309159	-0.112801	0.0740094	0.206772	-0.224486	0.160123	0.814915	-0.235116	0.129646	0.770693	-0.149904	0.607216	0.688148	-0.179865	0.528267	0.692227
ENSG00000179085	DPM3	dolichyl-phosphate mannosyltransferase subunit 3, regulatory [Source:HGNC Symbol;Acc:HGNC:3007]	54344					-0.260053	0.0293916	0.106352	-0.295335	0.00937098	0.0543407	-0.36936	0.00162311	0.0233045	-0.377583	0.000353117	0.00478957	-0.105563	0.104282	0.244769	-0.123132	0.0507633	0.173419	0.248162	0.115252	0.797116	0.286597	0.063874	0.682706	0.533874	0.0612812	0.368505	0.610853	0.0302336	0.329577
ENSG00000116478	HDAC1	histone deacetylase 1 [Source:HGNC Symbol;Acc:HGNC:4852]	3065	blood coagulation; Notch signaling pathway; positive regulation of cell proliferation; transforming growth factor beta receptor signaling pathway; chromatin organization; negative regulation of gene expression	blood coagulation			0.393744	0.000731575	0.0173068	0.357729	0.00149577	0.0214802	0.3673	0.00163315	0.0233045	0.315738	0.00312125	0.0145332	0.175863	0.00580665	0.0672191	0.163652	0.0088508	0.0756957	-0.0957897	0.545105	0.872562	-0.13375	0.39064	0.843033	-0.651768	0.0214811	0.2765	-0.720174	0.0102288	0.253076
ENSG00000165475	CRYL1	crystallin lambda 1 [Source:HGNC Symbol;Acc:HGNC:18246]	51084	oxidation-reduction process; fatty acid metabolic process			Hepatocytes	-0.236943	0.0498019	0.13929	-0.253803	0.0262899	0.0964351	-0.3724	0.00163989	0.0233045	-0.348289	0.00104587	0.00807747	-0.131405	0.0442388	0.167513	-0.136282	0.0302131	0.136291	-0.277381	0.0660742	0.770375	-0.35775	0.0200434	0.584041	-0.601883	0.0274134	0.294438	-0.713497	0.0109804	0.254364
ENSG00000177663	IL17RA	interleukin 17 receptor A [Source:HGNC Symbol;Acc:HGNC:5985]	23765				monocytes | Kupffer cells	0.430239	0.000327701	0.0119445	0.419736	0.000165173	0.00800408	0.378678	0.00164501	0.0233045	0.355381	0.000811474	0.00698813	0.21703	0.000861014	0.028794	0.216568	0.000438338	0.0205799	-0.24261	0.107415	0.797116	-0.292743	0.0582817	0.682706	-0.156018	0.571064	0.675266	-0.281129	0.323511	0.606453
ENSG00000141562	NARF	nuclear prelamin A recognition factor [Source:HGNC Symbol;Acc:HGNC:29916]	26502				Erythroid cells	0.22248	0.0678491	0.165073	0.185102	0.107358	0.201012	0.374967	0.00164641	0.0233045	0.302118	0.00476979	0.0179835	0.126908	0.0539579	0.183895	0.113297	0.0727266	0.205035	0.146547	0.346226	0.849602	0.127592	0.412907	0.848016	0.349953	0.214584	0.515228	0.333437	0.241102	0.55827
ENSG00000164188	RANBP3L	RAN binding protein 3 like [Source:HGNC Symbol;Acc:HGNC:26353]	202151					-0.383346	0.000958724	0.0198427	-0.444847	6.00084e-05	0.00483528	-0.364956	0.00164661	0.0233045	-0.418767	6.42772e-05	0.00239864	-0.193875	0.00211044	0.0429431	-0.224077	0.000265426	0.0180959	-0.26373	0.0884055	0.77938	-0.300994	0.051409	0.682706	-0.348795	0.216397	0.516543	-0.425799	0.133477	0.485321
ENSG00000099290	WASHC2A	WASH complex subunit 2A [Source:HGNC Symbol;Acc:HGNC:23416]	387680					0.164514	0.179234	0.2679	0.171633	0.135825	0.227237	0.375286	0.00164812	0.0233045	0.338396	0.00147605	0.00969333	0.0357379	0.591319	0.51464	0.0427184	0.501875	0.478822	0.409064	0.00781031	0.605959	0.372279	0.0153925	0.574659	0.699353	0.0124634	0.246801	0.684269	0.014867	0.285725
ENSG00000115648	MLPH	melanophilin [Source:HGNC Symbol;Acc:HGNC:29643]	79083				granulocytes	-0.315516	0.00829449	0.055221	-0.34768	0.00206018	0.0252997	-0.37157	0.00164974	0.0233045	-0.392752	0.00019331	0.00359387	-0.154663	0.0171749	0.110229	-0.17706	0.00448894	0.0551914	-0.298125	0.0567025	0.770375	-0.308277	0.0459103	0.680192	-0.401642	0.159362	0.478198	-0.411965	0.146723	0.499969
ENSG00000145817	YIPF5	Yip1 domain family member 5 [Source:HGNC Symbol;Acc:HGNC:24877]	81555	protein transport				-0.0257027	0.827728	0.563473	0.0690341	0.550595	0.454864	0.359983	0.00165253	0.0233045	0.423478	5.21578e-05	0.00216773	-0.00989244	0.876988	0.605502	0.0351211	0.581024	0.509113	0.121635	0.445452	0.862164	0.10733	0.491208	0.858225	0.0863214	0.765862	0.734429	0.121212	0.671019	0.74044
ENSG00000168612	ZSWIM1	zinc finger SWIM-type containing 1 [Source:HGNC Symbol;Acc:HGNC:16155]	90204					0.151429	0.217466	0.294766	0.0972965	0.399767	0.391552	0.3758	0.00165284	0.0233045	0.255757	0.01759	0.0377278	0.0747867	0.260627	0.358569	0.0487643	0.443158	0.453298	0.275274	0.0740279	0.770375	0.306258	0.0473831	0.680192	0.473584	0.0908388	0.410885	0.551551	0.0509449	0.375353
ENSG00000169562	GJB1	gap junction protein beta 1 [Source:HGNC Symbol;Acc:HGNC:4283]	2705			*	Hepatocytes | Cholangiocytes	-0.282101	0.0173692	0.080173	-0.339966	0.00261675	0.0277916	-0.367176	0.00165683	0.0233045	-0.401523	0.000134665	0.00304575	-0.157437	0.0140399	0.100952	-0.18339	0.00319757	0.0458849	-0.35573	0.0233734	0.684653	-0.379477	0.0134568	0.563079	-0.398877	0.165336	0.48205	-0.462484	0.102756	0.447909
ENSG00000172661	WASHC2C	WASH complex subunit 2C [Source:HGNC Symbol;Acc:HGNC:23414]	253725				granulocytes	0.146505	0.211624	0.290467	0.220425	0.0544513	0.142283	0.358784	0.0016651	0.0233045	0.409852	9.46732e-05	0.00261984	0.0549362	0.387767	0.429548	0.0896759	0.156861	0.288098	0.363734	0.0187317	0.675133	0.404996	0.0081948	0.522093	0.643943	0.022011	0.277125	0.684803	0.0147865	0.285115
ENSG00000186063	AIDA	axin interactor, dorsalization associated [Source:HGNC Symbol;Acc:HGNC:25761]	64853					0.341182	0.00458652	0.0403938	0.368524	0.00104887	0.0184345	0.374975	0.00166607	0.0233045	0.385155	0.000262324	0.00412955	0.223356	0.000523362	0.0246222	0.235221	0.000121388	0.0119302	0.23056	0.152844	0.814915	0.200296	0.197459	0.803059	0.703887	0.015098	0.254722	0.669435	0.0172606	0.294781
ENSG00000134330	IAH1	isoamyl acetate hydrolyzing esterase 1 (putative) [Source:HGNC Symbol;Acc:HGNC:27696]	285148					0.0108437	0.92651	0.593238	0.0717971	0.534727	0.449512	-0.358009	0.00166679	0.0233045	-0.216925	0.0449782	0.0661036	0.0229355	0.718331	0.557187	0.0527018	0.407094	0.437917	0.218187	0.171887	0.816199	0.237512	0.125735	0.766034	0.71552	0.0124848	0.246801	0.726898	0.00951779	0.253076
ENSG00000241360	PDXP	pyridoxal phosphatase [Source:HGNC Symbol;Acc:HGNC:30259]	57026				Plasma cells	-0.264156	0.0236659	0.0942327	-0.33213	0.00331705	0.0317484	-0.360675	0.00167062	0.0233045	-0.42751	4.35138e-05	0.0020896	-0.0994586	0.118167	0.257958	-0.137677	0.0285199	0.132851	0.331847	0.0319511	0.71947	0.321322	0.0372801	0.647868	0.839623	0.00246472	0.161219	0.812664	0.00358436	0.198792
ENSG00000127184	COX7C	cytochrome c oxidase subunit 7C [Source:HGNC Symbol;Acc:HGNC:2292]	1350	small molecule metabolic process; respiratory electron transport chain; cellular metabolic process; generation of precursor metabolites and energy; hydrogen ion transmembrane transport				-0.169642	0.167823	0.257814	-0.15891	0.167664	0.255009	-0.376242	0.00168407	0.0234354	-0.326734	0.00218517	0.0120245	-0.0972218	0.143774	0.281504	-0.09565	0.130745	0.266219	0.426106	0.00694731	0.605959	0.421716	0.00582175	0.487795	0.638905	0.0268272	0.292922	0.62711	0.0259968	0.316386
ENSG00000138613	APH1B	aph-1 homolog B, gamma-secretase subunit [Source:HGNC Symbol;Acc:HGNC:24080]	83464	axon guidance; ephrin receptor signaling pathway; Notch signaling pathway; positive regulation of apoptotic process				0.171335	0.152137	0.246337	0.229354	0.0451952	0.128354	0.365947	0.00169436	0.0234413	0.396002	0.000169268	0.00339179	0.121544	0.0593489	0.190424	0.145524	0.0204214	0.11278	0.389111	0.0143186	0.638764	0.383726	0.0124166	0.563079	1.0786	0.000127687	0.0910797	1.07153	9.19113e-05	0.108667
ENSG00000088854	DNAAF9	dynein axonemal assembly factor 9 [Source:HGNC Symbol;Acc:HGNC:17721]	25943					0.117675	0.328534	0.360591	0.188417	0.10112	0.195187	0.367027	0.00170431	0.0234413	0.404023	0.000121264	0.00290217	0.0738135	0.256874	0.356549	0.109036	0.0843615	0.219497	0.533194	0.000413835	0.453152	0.517448	0.000623613	0.309156	0.73987	0.00786525	0.22389	0.736661	0.00856266	0.249812
ENSG00000136295	TTYH3	tweety family member 3 [Source:HGNC Symbol;Acc:HGNC:22222]	80727	chloride transport; chloride transmembrane transport; ion transmembrane transport	transmembrane transport; chloride transmembrane transport; ion transmembrane transport		Kupffer cells	0.395587	0.000857653	0.0187302	0.34134	0.00250865	0.0277255	0.372178	0.00170446	0.0234413	0.299679	0.00513579	0.0187575	0.236723	0.00020357	0.0204913	0.213634	0.00053038	0.0229875	0.202131	0.20393	0.825564	0.143829	0.355778	0.843033	0.632333	0.0271634	0.293493	0.580326	0.039772	0.350244
ENSG00000119321	FKBP15	FKBP prolyl isomerase family member 15 [Source:HGNC Symbol;Acc:HGNC:23397]	23307	endocytosis				0.13268	0.276762	0.332115	0.13587	0.238778	0.302915	0.371945	0.00170756	0.0234413	0.340083	0.00139292	0.00934457	0.0239205	0.717861	0.557187	0.0323172	0.611618	0.521254	0.0575326	0.714167	0.892162	0.0892803	0.567054	0.873841	0.331017	0.24418	0.53454	0.395585	0.163657	0.510922
ENSG00000248485	PCP4L1	Purkinje cell protein 4 like 1 [Source:HGNC Symbol;Acc:HGNC:20448]	654790					-0.339248	0.00203766	0.0280588	-0.419194	0.000168693	0.00808881	-0.343288	0.00170934	0.0234413	-0.41399	7.92008e-05	0.00250079	-0.199552	0.000749094	0.0281967	-0.236011	0.00011464	0.0119302	-0.179315	0.261658	0.841179	-0.158521	0.308543	0.834456	-0.63523	0.0269216	0.292922	-0.607686	0.0311234	0.331808
ENSG00000115325	DOK1	docking protein 1 [Source:HGNC Symbol;Acc:HGNC:2990]	1796	signal transduction; transmembrane receptor protein tyrosine kinase signaling pathway			monocytes | granulocytes	0.134225	0.275018	0.330977	0.170152	0.139276	0.230018	0.374832	0.00171213	0.0234413	0.371134	0.000452354	0.00532443	0.11565	0.080547	0.218819	0.130432	0.0382668	0.154431	-0.222537	0.14275	0.806994	-0.288575	0.0620284	0.682706	-0.726344	0.00753979	0.222568	-0.821687	0.00321384	0.192625
ENSG00000204178	MACO1	macoilin 1 [Source:HGNC Symbol;Acc:HGNC:25572]	55219					0.347029	0.00405824	0.0378793	0.314767	0.00549759	0.0405278	0.375557	0.00171297	0.0234413	0.30428	0.00446493	0.0174815	0.180303	0.00588393	0.067914	0.164714	0.00840336	0.074157	0.271839	0.0899582	0.77938	0.252206	0.103693	0.733895	0.782764	0.00645493	0.218498	0.749413	0.0074426	0.243153
ENSG00000229980	TOB1-AS1	TOB1 antisense RNA 1 [Source:HGNC Symbol;Acc:HGNC:44340]	400604					-0.306327	0.0125169	0.0683154	-0.29958	0.00836403	0.0508862	-0.379058	0.00172562	0.0235427	-0.341103	0.00134474	0.00923349	-0.114888	0.0863593	0.22543	-0.118619	0.0600466	0.188089	0.252034	0.111758	0.797116	0.247693	0.110114	0.742893	0.565364	0.0485773	0.347055	0.56247	0.046434	0.368333
ENSG00000196177	ACADSB	acyl-CoA dehydrogenase short/branched chain [Source:HGNC Symbol;Acc:HGNC:91]	36	small molecule metabolic process; cellular nitrogen compound metabolic process; fatty acid beta-oxidation using acyl-CoA dehydrogenase; fatty acid metabolic process; branched-chain amino acid catabolic process; lipid homeostasis		*	Hepatocytes	-0.236993	0.049717	0.139161	-0.265394	0.0199987	0.0830336	-0.37062	0.00172856	0.0235427	-0.359405	0.00070088	0.00655058	-0.133995	0.040095	0.160403	-0.144211	0.02162	0.115344	0.344761	0.030105	0.71547	0.321832	0.0369726	0.647868	0.741391	0.00980268	0.234576	0.720465	0.0101971	0.253076
ENSG00000277972	CISD3	CDGSH iron sulfur domain 3 [Source:HGNC Symbol;Acc:HGNC:27578]	284106				Hepatocytes	-0.138595	0.260899	0.322972	-0.159733	0.165451	0.253317	-0.374891	0.00176279	0.0239523	-0.353314	0.000874281	0.00731937	-0.0873234	0.189894	0.312017	-0.0965409	0.127153	0.26311	0.162601	0.313303	0.845772	0.149517	0.336984	0.841881	0.518376	0.0748792	0.3887	0.517117	0.0675873	0.402995
ENSG00000172795	DCP2	decapping mRNA 2 [Source:HGNC Symbol;Acc:HGNC:24452]	167227					0.140209	0.251963	0.317679	0.162327	0.158617	0.248677	0.371946	0.00177891	0.0240585	0.359261	0.000704575	0.00656129	0.0746704	0.259544	0.357999	0.089316	0.15855	0.289206	-0.278888	0.0764913	0.770375	-0.297138	0.0545326	0.682706	-0.374049	0.192548	0.497987	-0.3984	0.160649	0.510247
ENSG00000166816	LDHD	lactate dehydrogenase D [Source:HGNC Symbol;Acc:HGNC:19708]	197257	oxidation-reduction process			Hepatocytes	-0.212718	0.0719386	0.170153	-0.282596	0.0130578	0.0652664	-0.361215	0.00177896	0.0240585	-0.409456	9.6294e-05	0.00261984	-0.112286	0.0792901	0.217057	-0.143843	0.0219671	0.116271	0.361257	0.0228054	0.684653	0.332109	0.0312111	0.62781	0.668476	0.0202639	0.27187	0.638871	0.0232563	0.306528
ENSG00000092621	PHGDH	phosphoglycerate dehydrogenase [Source:HGNC Symbol;Acc:HGNC:8923]	26227	small molecule metabolic process; oxidation-reduction process; cellular nitrogen compound metabolic process	oxidation-reduction process			-0.420955	0.00030203	0.0114775	-0.46002	3.13811e-05	0.00418189	-0.365787	0.0017879	0.0241228	-0.405674	0.000113103	0.00283258	-0.232301	0.000223029	0.0204913	-0.252736	3.22334e-05	0.00771445	-0.361295	0.0138708	0.638764	-0.43439	0.00445161	0.457325	-0.631346	0.0180362	0.26771	-0.718233	0.0104426	0.254306
ENSG00000083807	SLC27A5	solute carrier family 27 member 5 [Source:HGNC Symbol;Acc:HGNC:10999]	10998	small molecule metabolic process; bile acid and bile salt transport; bile acid metabolic process; bile acid biosynthetic process		*	Hepatocytes	-0.226659	0.0573478	0.150941	-0.290519	0.0106406	0.0585337	-0.364485	0.00179594	0.0241382	-0.412647	8.39446e-05	0.00252804	-0.14368	0.0253813	0.129409	-0.173272	0.00546728	0.0602075	0.144399	0.362658	0.851683	0.149363	0.337482	0.842017	0.357636	0.213428	0.514371	0.337088	0.235949	0.55421
ENSG00000039560	RAI14	retinoic acid induced 14 [Source:HGNC Symbol;Acc:HGNC:14873]	26064					0.0511244	0.66738	0.509144	0.12406	0.282388	0.329408	0.360041	0.00179742	0.0241382	0.397032	0.000162246	0.00337132	0.0228919	0.72215	0.558758	0.0552118	0.385033	0.425701	0.284994	0.074355	0.770375	0.256774	0.0974945	0.72552	0.489611	0.0916712	0.411316	0.451458	0.111343	0.461714
ENSG00000163344	PMVK	phosphomevalonate kinase [Source:HGNC Symbol;Acc:HGNC:9141]	10654	small molecule metabolic process				-0.196544	0.107333	0.206838	-0.236858	0.0384621	0.117234	-0.371596	0.00181608	0.0242782	-0.380188	0.000319046	0.00456392	-0.10178	0.123499	0.263605	-0.121597	0.0537772	0.178076	0.436493	0.00497606	0.599014	0.437329	0.00417828	0.457325	0.503777	0.0782137	0.395143	0.495812	0.0799216	0.419841
ENSG00000236882	LINC01554	long intergenic non-protein coding RNA 1554 [Source:HGNC Symbol;Acc:HGNC:24687]	202299			*		0.160684	0.185228	0.27194	0.166338	0.148466	0.239023	-0.368254	0.00182306	0.0242782	-0.265927	0.013447	0.0321938	0.0444743	0.499544	0.478247	0.0514504	0.418365	0.442389	0.484794	0.00208295	0.579102	0.482743	0.00148304	0.401719	0.786249	0.00625957	0.217894	0.779149	0.00531817	0.224515
ENSG00000141505	ASGR1	asialoglycoprotein receptor 1 [Source:HGNC Symbol;Acc:HGNC:742]	432			*	Hepatocytes	-0.154773	0.196801	0.279673	-0.199247	0.0827056	0.175243	-0.363985	0.00182322	0.0242782	-0.368488	0.000500036	0.00563296	-0.10715	0.0976018	0.237962	-0.122675	0.0516445	0.174573	0.117319	0.458791	0.865416	0.0976624	0.531154	0.867741	0.358428	0.211266	0.513116	0.379997	0.18108	0.522099
ENSG00000105852	PON3	paraoxonase 3 [Source:HGNC Symbol;Acc:HGNC:9206]	5446	response to toxic substance		*	Hepatocytes	-0.237158	0.0519114	0.142965	-0.250511	0.0283569	0.0997901	-0.372537	0.0018247	0.0242782	-0.342984	0.00125979	0.00892387	-0.13813	0.0360662	0.153622	-0.141718	0.0240624	0.122758	-0.282322	0.0764137	0.770375	-0.301092	0.0513316	0.682706	-0.364786	0.209393	0.511103	-0.391313	0.168303	0.514924
ENSG00000211450	SELENOH	selenoprotein H [Source:HGNC Symbol;Acc:HGNC:18251]	280636					-0.0559956	0.650571	0.503316	-0.0940971	0.415504	0.399596	-0.373498	0.00183293	0.0243315	-0.364604	0.000578375	0.00597061	-0.0411168	0.53853	0.493998	-0.0591282	0.352081	0.410481	-0.241288	0.122595	0.798269	-0.223224	0.150448	0.78289	-0.649974	0.0209006	0.273433	-0.65205	0.0204823	0.303103
ENSG00000104884	ERCC2	ERCC excision repair 2, TFIIH core complex helicase subunit [Source:HGNC Symbol;Acc:HGNC:3434]	2068	small molecule metabolic process; response to oxidative stress				-0.254674	0.0376562	0.120246	-0.250492	0.0283691	0.0997901	-0.374336	0.00184468	0.024414	-0.328182	0.00208296	0.011736	-0.132782	0.0453736	0.169412	-0.133271	0.0341596	0.14432	0.215112	0.169702	0.816199	0.19412	0.21176	0.804938	0.687814	0.0144329	0.251853	0.679462	0.0156091	0.287023
ENSG00000099795	NDUFB7	NADH:ubiquinone oxidoreductase subunit B7 [Source:HGNC Symbol;Acc:HGNC:7702]	4713	small molecule metabolic process; respiratory electron transport chain; cellular metabolic process; mitochondrial electron transport, NADH to ubiquinone				-0.148557	0.210631	0.290097	-0.222951	0.0516876	0.138798	-0.359652	0.00184982	0.024414	-0.404448	0.000119114	0.00288202	-0.0874327	0.172939	0.30158	-0.119561	0.0580029	0.185039	-0.223547	0.160308	0.814915	-0.201968	0.19371	0.800341	-0.466663	0.105855	0.425477	-0.403293	0.155516	0.508531
ENSG00000029153	BMAL2	basic helix-loop-helix ARNT like 2 [Source:HGNC Symbol;Acc:HGNC:18984]	56938					0.343819	0.00387333	0.0373263	0.374314	0.000862867	0.0167488	0.367718	0.00185186	0.024414	0.390309	0.000213413	0.00380394	0.132983	0.0413016	0.162214	0.153807	0.0140961	0.0934172	-0.289527	0.06564	0.770375	-0.309162	0.0452765	0.679033	-0.338441	0.238657	0.531334	-0.407639	0.151061	0.503441
ENSG00000146872	TLK2	tousled like kinase 2 [Source:HGNC Symbol;Acc:HGNC:11842]	11011	intracellular signal transduction; protein phosphorylation; peptidyl-serine phosphorylation; cell cycle				0.103714	0.397714	0.399053	0.138668	0.229171	0.296281	0.370572	0.00186043	0.024425	0.358861	0.000714984	0.00659493	0.0622337	0.348063	0.40893	0.077571	0.221363	0.336751	0.137404	0.393439	0.854871	0.108274	0.487392	0.857848	0.594204	0.0401013	0.329895	0.543275	0.0545997	0.380372
ENSG00000145703	IQGAP2	IQ motif containing GTPase activating protein 2 [Source:HGNC Symbol;Acc:HGNC:6111]	10788					-0.161082	0.189961	0.274847	-0.200714	0.0804306	0.17293	-0.372415	0.00186117	0.024425	-0.370142	0.000469725	0.00542715	-0.0834831	0.209494	0.32486	-0.101852	0.107286	0.244621	0.183796	0.249917	0.841179	0.19609	0.207122	0.804834	0.166026	0.568177	0.67438	0.199774	0.483529	0.673816
ENSG00000105784	RUNDC3B	RUN domain containing 3B [Source:HGNC Symbol;Acc:HGNC:30286]	154661					-0.385096	0.00137791	0.022874	-0.388829	0.000521043	0.0131668	-0.373129	0.00189018	0.0247493	-0.361232	0.000655358	0.00636428	-0.181076	0.00578189	0.0672191	-0.187265	0.00258227	0.0419041	0.255276	0.107282	0.797116	0.236045	0.128118	0.769415	0.770534	0.00665538	0.220126	0.776544	0.00547992	0.227003
ENSG00000072682	P4HA2	prolyl 4-hydroxylase subunit alpha 2 [Source:HGNC Symbol;Acc:HGNC:8547]	8974					0.0733484	0.538399	0.460476	0.163594	0.155357	0.245678	0.359233	0.00189951	0.024815	0.424815	4.91284e-05	0.00214407	0.0395044	0.540264	0.494802	0.0855073	0.177265	0.304974	0.0889514	0.578306	0.87952	0.0681909	0.662094	0.887131	0.416818	0.14938	0.470384	0.377466	0.184032	0.52266
ENSG00000174586	ZNF497	zinc finger protein 497 [Source:HGNC Symbol;Acc:HGNC:23714]	162968					-0.173898	0.157907	0.250753	-0.208521	0.0691545	0.161026	-0.372617	0.00190828	0.0248732	-0.367605	0.000516934	0.00572879	-0.0688077	0.303031	0.382652	-0.0876261	0.166664	0.296726	0.176166	0.256591	0.841179	0.185667	0.232508	0.812385	0.460997	0.10069	0.421788	0.496624	0.079421	0.419841
ENSG00000008869	HEATR5B	HEAT repeat containing 5B [Source:HGNC Symbol;Acc:HGNC:29273]	54497					0.208844	0.0832872	0.1804	0.257257	0.0242597	0.0920646	0.365795	0.00191541	0.0249098	0.372853	0.000423663	0.00518234	0.0950838	0.146033	0.282919	0.116592	0.064644	0.193501	0.450328	0.00447877	0.599014	0.458436	0.00261658	0.457325	0.518712	0.0753866	0.389156	0.53457	0.058673	0.386025
ENSG00000227403	LINC01806	long intergenic non-protein coding RNA 1806 [Source:HGNC Symbol;Acc:HGNC:52599]	100996579					-0.14321	0.240995	0.310995	-0.156118	0.175333	0.260795	-0.368614	0.00192628	0.0249654	-0.348677	0.00103163	0.00801303	-0.0759806	0.250326	0.351962	-0.0849855	0.17995	0.306821	0.34794	0.0258942	0.688708	0.347017	0.0242117	0.606827	0.695218	0.0139336	0.251853	0.705818	0.0119041	0.264516
ENSG00000170315	UBB	ubiquitin B [Source:HGNC Symbol;Acc:HGNC:12463]	7314	small molecule metabolic process				-0.298322	0.01234	0.0677542	-0.316688	0.00520579	0.0398168	-0.364794	0.00192835	0.0249654	-0.370125	0.000470023	0.00542715	-0.134921	0.0375079	0.155552	-0.150058	0.0167105	0.103071	-0.171351	0.256747	0.841179	-0.231484	0.135753	0.772292	-0.477912	0.0799725	0.397692	-0.562285	0.0465075	0.368467
ENSG00000114999	TTL	tubulin tyrosine ligase [Source:HGNC Symbol;Acc:HGNC:21586]	150465		cellular protein modification process			0.441539	0.000173985	0.00878225	0.447133	5.45222e-05	0.00479963	0.367522	0.00194896	0.0251757	0.365771	0.00055374	0.00587504	0.206793	0.00130146	0.0357858	0.213205	0.000545197	0.0230206	0.218942	0.159669	0.814915	0.227478	0.142738	0.782191	0.292452	0.302196	0.565798	0.325426	0.252678	0.566338
ENSG00000198865	CCDC152	coiled-coil domain containing 152 [Source:HGNC Symbol;Acc:HGNC:34438]	100129792					-0.329099	0.00631095	0.0476004	-0.331149	0.00341566	0.0322413	-0.369297	0.0019663	0.0252581	-0.351483	0.000933592	0.00764353	-0.163516	0.0124377	0.0961248	-0.167039	0.00749309	0.0704708	0.0942612	0.554629	0.874693	0.131602	0.398323	0.844985	0.610929	0.032818	0.304263	0.65883	0.0191693	0.301011
ENSG00000100417	PMM1	phosphomannomutase 1 [Source:HGNC Symbol;Acc:HGNC:9114]	5372					-0.326823	0.00582807	0.0458897	-0.367182	0.00109687	0.0189548	-0.363388	0.00196788	0.0252581	-0.400853	0.000138485	0.00306081	-0.159493	0.0132619	0.0985407	-0.183442	0.00318858	0.0458849	0.369255	0.0190864	0.675133	0.305044	0.0482877	0.682576	0.699673	0.0143121	0.251853	0.649623	0.0209706	0.304738
ENSG00000012504	NR1H4	nuclear receptor subfamily 1 group H member 4 [Source:HGNC Symbol;Acc:HGNC:7967]	9971	small molecule metabolic process; bile acid and bile salt transport; bile acid metabolic process; steroid hormone mediated signaling pathway		*	Hepatocytes | Cholangiocytes	-0.307762	0.00902985	0.0573012	-0.337935	0.00278414	0.0287955	-0.360569	0.00196849	0.0252581	-0.374781	0.000393484	0.00498711	-0.152445	0.0171926	0.110248	-0.166916	0.0075388	0.0704728	0.251638	0.114776	0.797116	0.233576	0.132208	0.770693	0.579155	0.0446702	0.341993	0.562753	0.0463216	0.368215
ENSG00000106609	TMEM248	transmembrane protein 248 [Source:HGNC Symbol;Acc:HGNC:25476]	55069					0.322274	0.00767243	0.0530099	0.29882	0.00853702	0.0511748	0.369401	0.00200715	0.0256968	0.323014	0.00246887	0.0128296	0.136699	0.0381153	0.156856	0.131169	0.0371627	0.151381	0.422322	0.00754276	0.605959	0.434522	0.00443901	0.457325	0.591982	0.0408144	0.33152	0.616399	0.0287271	0.326377
ENSG00000171492	LRRC8D	leucine rich repeat containing 8 VRAC subunit D [Source:HGNC Symbol;Acc:HGNC:16992]	55144					0.45565	0.000150161	0.0084989	0.413365	0.000211115	0.00896626	0.374781	0.00201295	0.0257082	0.31108	0.00361618	0.0155187	0.195691	0.00305358	0.0511792	0.184477	0.00301291	0.0447952	0.150247	0.349975	0.850281	0.123084	0.429669	0.850091	0.490714	0.0909046	0.410885	0.473627	0.094614	0.438844
ENSG00000122971	ACADS	acyl-CoA dehydrogenase short chain [Source:HGNC Symbol;Acc:HGNC:90]	35	small molecule metabolic process; fatty acid beta-oxidation using acyl-CoA dehydrogenase; response to glucocorticoid; fatty acid beta-oxidation; protein homotetramerization; lipid homeostasis; cellular lipid metabolic process; response to starvation			Hepatocytes	-0.138207	0.245116	0.313501	-0.206178	0.0723952	0.164783	-0.357343	0.00201696	0.0257082	-0.391603	0.000202537	0.00372506	-0.0847771	0.187113	0.310192	-0.112695	0.0742869	0.206986	0.21433	0.176968	0.816199	0.175425	0.259494	0.824053	0.38877	0.177433	0.489259	0.359345	0.206196	0.539152
ENSG00000169714	CNBP	CCHC-type zinc finger nucleic acid binding protein [Source:HGNC Symbol;Acc:HGNC:13164]	7555		positive regulation of cell proliferation			-0.354737	0.00276174	0.0322566	-0.339792	0.00263074	0.0277916	-0.363816	0.00202379	0.0257227	-0.345146	0.00116825	0.00864402	-0.119555	0.0664849	0.200784	-0.124276	0.0486074	0.169822	0.420489	0.00779677	0.605959	0.424226	0.00552391	0.478815	0.674555	0.0192802	0.27118	0.658181	0.0192917	0.301191
ENSG00000146085	MMUT	methylmalonyl-CoA mutase [Source:HGNC Symbol;Acc:HGNC:7526]	4594					-0.303025	0.0120754	0.0670067	-0.321941	0.00447675	0.0367624	-0.367611	0.00203749	0.0257227	-0.359996	0.00068583	0.00646862	-0.165928	0.0110451	0.0914792	-0.174364	0.00516752	0.0589263	0.262359	0.0951696	0.780981	0.240012	0.12175	0.760166	0.465581	0.103043	0.423394	0.466624	0.0996694	0.44252
ENSG00000130338	TULP4	TUB like protein 4 [Source:HGNC Symbol;Acc:HGNC:15530]	56995	intracellular signal transduction; protein ubiquitination				0.36503	0.0026869	0.0319248	0.307053	0.00682099	0.0459793	0.373133	0.00203853	0.0257227	0.276524	0.0100595	0.0269208	0.163664	0.0136335	0.0998165	0.141443	0.0243459	0.123387	0.0584381	0.716602	0.892162	0.0644432	0.67962	0.8888	0.129085	0.658726	0.702665	0.142049	0.618584	0.721583
ENSG00000204580	DDR1	discoidin domain receptor tyrosine kinase 1 [Source:HGNC Symbol;Acc:HGNC:2730]	780	extracellular matrix organization; cell adhesion; negative regulation of cell proliferation				-0.0187988	0.877921	0.579038	0.0247585	0.83064	0.54549	0.365946	0.00204422	0.0257227	0.361122	0.000658026	0.0063697	-0.0482367	0.465683	0.465151	-0.0243839	0.701719	0.550797	0.261747	0.100186	0.792965	0.22671	0.144108	0.782191	0.803921	0.00476622	0.198588	0.792106	0.00457499	0.220774
ENSG00000139436	GIT2	GIT ArfGAP 2 [Source:HGNC Symbol;Acc:HGNC:4273]	9815	positive regulation of GTPase activity				0.484512	3.44598e-05	0.00516035	0.43176	0.000102652	0.00652604	0.36705	0.00204481	0.0257227	0.306981	0.00410852	0.0165547	0.242198	0.000146071	0.0191576	0.22363	0.000273621	0.0181388	-0.211703	0.174625	0.816199	-0.188509	0.22538	0.812385	-0.20831	0.463632	0.638749	-0.171379	0.547946	0.696585
ENSG00000130988	RGN	regucalcin [Source:HGNC Symbol;Acc:HGNC:9989]	9104		aging		Hepatocytes	-0.333507	0.00543422	0.044149	-0.352724	0.00175648	0.0231401	-0.366578	0.00204793	0.0257227	-0.360999	0.000661002	0.00638651	-0.179288	0.00575502	0.0672191	-0.187577	0.00253776	0.0418685	0.290453	0.0670046	0.770375	0.237235	0.126182	0.766276	0.877994	0.00191085	0.147903	0.829575	0.00291842	0.192625
ENSG00000100092	SH3BP1	SH3 domain binding protein 1 [Source:HGNC Symbol;Acc:HGNC:10824]	23616	signal transduction; positive regulation of GTPase activity				0.0800595	0.514131	0.451496	0.0899399	0.436481	0.40847	0.367161	0.00205573	0.0257227	0.326848	0.00217696	0.012003	0.0899718	0.173632	0.301734	0.0946044	0.135059	0.270332	0.217751	0.171866	0.816199	0.190464	0.220567	0.811191	0.809298	0.00442381	0.190968	0.805906	0.00388647	0.200828
ENSG00000137171	KLC4	kinesin light chain 4 [Source:HGNC Symbol;Acc:HGNC:21624]	89953					-0.250216	0.0374725	0.119872	-0.290682	0.0105952	0.0584558	-0.363729	0.00206348	0.0257227	-0.377269	0.000357436	0.00478957	-0.128209	0.049093	0.175512	-0.14738	0.0188244	0.109097	0.381087	0.0114202	0.63842	0.35518	0.0209809	0.584041	0.597909	0.0295995	0.29907	0.588908	0.0368661	0.345681
ENSG00000125520	SLC2A4RG	SLC2A4 regulator [Source:HGNC Symbol;Acc:HGNC:15930]	56731				Hepatocytes	-0.29667	0.0132924	0.070272	-0.341481	0.00249777	0.0276937	-0.36414	0.00207092	0.0257227	-0.389127	0.000223818	0.00388002	-0.137899	0.0342534	0.15003	-0.161062	0.0100303	0.0801263	0.300701	0.0574984	0.770375	0.323694	0.035867	0.6477	0.502148	0.0811445	0.399374	0.560111	0.0473793	0.370672
ENSG00000072518	MARK2	microtubule affinity regulating kinase 2 [Source:HGNC Symbol;Acc:HGNC:3332]	2011	intracellular signal transduction; protein phosphorylation; positive regulation of neuron projection development				0.140079	0.249218	0.315773	0.0936047	0.417958	0.400925	0.364425	0.00207168	0.0257227	0.26104	0.0153181	0.0348584	0.062941	0.339197	0.404503	0.0408456	0.520852	0.485766	0.319484	0.0423096	0.754462	0.365724	0.0173604	0.574659	0.732072	0.00985822	0.234576	0.764698	0.00627194	0.239709
ENSG00000154258	ABCA9	ATP binding cassette subfamily A member 9 [Source:HGNC Symbol;Acc:HGNC:39]	10350	lipid transport	lipid transport		Fibroblasts	-0.350306	0.00298689	0.0335229	-0.30731	0.00677286	0.045878	-0.361253	0.00207191	0.0257227	-0.307367	0.00405978	0.0164622	-0.188763	0.00311339	0.0517555	-0.174544	0.00511947	0.0588627	0.258995	0.104855	0.797116	0.219755	0.156964	0.784872	0.568909	0.0489738	0.348803	0.551457	0.0509855	0.375353
ENSG00000148426	PROSER2	proline and serine rich 2 [Source:HGNC Symbol;Acc:HGNC:23728]	254427				Hepatocytes	-0.331674	0.00541913	0.044149	-0.304959	0.00722573	0.0471927	-0.364037	0.00207348	0.0257227	-0.308823	0.00388037	0.0160764	-0.130314	0.0456955	0.17	-0.121288	0.0544027	0.179154	0.222098	0.163949	0.815145	0.185717	0.232382	0.812385	0.461918	0.110253	0.430666	0.397293	0.161827	0.510247
ENSG00000183617	MRPL54	mitochondrial ribosomal protein L54 [Source:HGNC Symbol;Acc:HGNC:16685]	116541					-0.220422	0.0695703	0.166528	-0.242001	0.034349	0.110718	-0.366081	0.00207614	0.0257227	-0.357703	0.000745854	0.00669635	-0.126178	0.0545897	0.1846	-0.135523	0.03117	0.137835	0.160487	0.315514	0.845772	0.195211	0.209182	0.804938	0.482538	0.0948252	0.413609	0.534221	0.058841	0.386025
ENSG00000122861	PLAU	plasminogen activator, urokinase [Source:HGNC Symbol;Acc:HGNC:9052]	5328	blood coagulation; signal transduction; chemotaxis; positive regulation of cell proliferation; spermatogenesis				0.0669182	0.581211	0.47888	0.120894	0.294929	0.337195	0.362313	0.00208919	0.0257923	0.380641	0.000313434	0.00452132	0.0114179	0.86201	0.600927	0.0391158	0.538697	0.493013	-0.337889	0.0307903	0.71547	-0.383497	0.0124708	0.563079	-0.394339	0.16843	0.484565	-0.447684	0.114407	0.464758
ENSG00000164761	TNFRSF11B	TNF receptor superfamily member 11b [Source:HGNC Symbol;Acc:HGNC:11909]	4982	extracellular matrix organization; signal transduction; response to drug				0.143727	0.227595	0.301907	0.204912	0.0741973	0.166394	0.356849	0.00209465	0.0257923	0.400918	0.000138113	0.00306081	0.0464727	0.472065	0.46724	0.0815226	0.198526	0.320154	0.113373	0.473525	0.866829	0.136951	0.379353	0.843033	0.111981	0.696922	0.715306	0.148731	0.60215	0.716685
ENSG00000111530	CAND1	cullin associated and neddylation dissociated 1 [Source:HGNC Symbol;Acc:HGNC:30688]	55832	protein ubiquitination				0.0931709	0.453422	0.42565	0.0833764	0.47079	0.423222	0.371333	0.00209519	0.0257923	0.303698	0.00454518	0.0176689	0.0255487	0.70431	0.552431	0.0238075	0.708449	0.553241	0.417118	0.00841211	0.61109	0.376661	0.0141873	0.563079	0.713089	0.0133176	0.249142	0.649925	0.0209094	0.304738
ENSG00000115020	PIKFYVE	phosphoinositide kinase, FYVE-type zinc finger containing [Source:HGNC Symbol;Acc:HGNC:23785]	200576	phosphatidylinositol biosynthetic process; intracellular signal transduction; phosphatidylinositol phosphorylation; phospholipid metabolic process; retrograde transport, endosome to Golgi				0.188859	0.125463	0.224503	0.194291	0.0907702	0.183817	0.369981	0.00210711	0.0258837	0.336549	0.00157224	0.0100145	0.0887647	0.183911	0.307676	0.0940768	0.137276	0.271513	0.237966	0.140598	0.804748	0.222436	0.151911	0.784872	0.192448	0.513732	0.657516	0.166752	0.558826	0.700513
ENSG00000125430	HS3ST3B1	heparan sulfate-glucosamine 3-sulfotransferase 3B1 [Source:HGNC Symbol;Acc:HGNC:5198]	9953	glycosaminoglycan metabolic process	glycosaminoglycan metabolic process; carbohydrate metabolic process; glycosaminoglycan biosynthetic process; small molecule metabolic process	*	Hepatocytes | dendritic cells	0.394239	0.000734562	0.0173116	0.42214	0.00015039	0.00787947	0.359432	0.00211557	0.0259324	0.389049	0.000224524	0.00388002	0.193007	0.00239423	0.0462174	0.215897	0.000457969	0.0211504	0.196843	0.217022	0.829775	0.162553	0.296329	0.831819	0.566396	0.048911	0.348626	0.510166	0.0714297	0.408521
ENSG00000175215	CTDSP2	CTD small phosphatase 2 [Source:HGNC Symbol;Acc:HGNC:17077]	10106					0.290354	0.0148877	0.0740679	0.239521	0.0362836	0.113973	0.36092	0.00214877	0.0262834	0.27098	0.0117247	0.0299352	0.151955	0.0186363	0.113648	0.128464	0.0413513	0.158465	0.274509	0.0821011	0.770751	0.242369	0.118083	0.756576	0.374863	0.19271	0.498155	0.348296	0.220613	0.548029
ENSG00000183955	KMT5A	lysine methyltransferase 5A [Source:HGNC Symbol;Acc:HGNC:29489]	387893					0.335675	0.00521378	0.0429286	0.347358	0.00208105	0.0252997	0.365218	0.00217635	0.0265643	0.349674	0.000995768	0.00796269	0.192355	0.00300774	0.0507904	0.195957	0.00157156	0.0361765	0.332739	0.0290131	0.71049	0.363453	0.0180909	0.575376	0.34618	0.215152	0.515391	0.399471	0.159515	0.509744
ENSG00000167183	PRR15L	proline rich 15 like [Source:HGNC Symbol;Acc:HGNC:28149]	79170					-0.296641	0.0136824	0.0712931	-0.282439	0.0131103	0.0653122	-0.363774	0.00218545	0.026619	-0.335484	0.00163024	0.0102465	-0.150081	0.0214318	0.120917	-0.150742	0.0162041	0.101129	0.423961	0.00734676	0.605959	0.440685	0.00388446	0.457325	0.938859	0.000954095	0.132253	0.963822	0.000485384	0.127109
ENSG00000167657	DAPK3	death associated protein kinase 3 [Source:HGNC Symbol;Acc:HGNC:2676]	1613	intracellular signal transduction; protein phosphorylation; regulation of cell shape; positive regulation of cell migration; positive regulation of apoptotic process				0.0289875	0.816367	0.56023	0.0368947	0.749901	0.520954	0.370813	0.00219744	0.0267086	0.319974	0.00272483	0.0134151	0.0150217	0.823994	0.589698	0.0206742	0.745412	0.564307	0.227581	0.151821	0.814915	0.214126	0.167982	0.785315	0.583117	0.041924	0.333678	0.554904	0.0495227	0.374067
ENSG00000183747	ACSM2A	acyl-CoA synthetase medium chain family member 2A [Source:HGNC Symbol;Acc:HGNC:32017]	123876	fatty acid metabolic process; triglyceride homeostasis		*	Hepatocytes	-0.245322	0.0347013	0.115156	-0.315771	0.00534328	0.040158	-0.349316	0.00220581	0.026754	-0.404954	0.000116598	0.00284576	-0.133085	0.0342129	0.15003	-0.163838	0.00877078	0.0754438	0.306156	0.0526043	0.76927	0.248109	0.10951	0.741592	0.485981	0.0910303	0.410885	0.409728	0.148955	0.501492
ENSG00000184985	SORCS2	sortilin related VPS10 domain containing receptor 2 [Source:HGNC Symbol;Acc:HGNC:16698]	57537					-0.243786	0.0455291	0.133164	-0.268467	0.0185657	0.0795629	-0.366024	0.00221131	0.0267642	-0.347992	0.00105691	0.00809947	-0.101409	0.12597	0.265772	-0.114565	0.0695242	0.200677	0.421836	0.00578745	0.605959	0.444962	0.00353694	0.457325	0.39193	0.164695	0.482025	0.437664	0.122858	0.471819
ENSG00000109103	UNC119	unc-119 lipid binding chaperone [Source:HGNC Symbol;Acc:HGNC:12565]	9094	endocytosis; synaptic transmission				0.13867	0.241202	0.3111	0.218658	0.056456	0.144783	0.35251	0.00221763	0.0267845	0.411527	8.81017e-05	0.00261132	0.0688603	0.282391	0.371194	0.111819	0.0766056	0.209963	-0.277432	0.0834052	0.770751	-0.29285	0.0581881	0.682706	-0.698811	0.0154711	0.255827	-0.704587	0.0120583	0.265472
ENSG00000129083	COPB1	COPI coat complex subunit beta 1 [Source:HGNC Symbol;Acc:HGNC:2231]	1315	intracellular protein transport; membrane organization				0.0335944	0.782971	0.548984	0.0976613	0.397996	0.390258	0.361666	0.00224084	0.0268252	0.382601	0.000290211	0.00434453	0.0191544	0.771607	0.574988	0.0493893	0.437317	0.451501	-0.238114	0.133234	0.803334	-0.273684	0.0770465	0.700197	-0.349506	0.225899	0.522672	-0.413682	0.145026	0.496845
ENSG00000158985	CDC42SE2	CDC42 small effector 2 [Source:HGNC Symbol;Acc:HGNC:18547]	56990	signal transduction; regulation of cell shape				0.0470262	0.701667	0.520065	0.0928181	0.421895	0.4025	0.36397	0.00225012	0.0268252	0.355318	0.000813345	0.00699255	0.0557294	0.400701	0.43601	0.0739838	0.243644	0.35232	-0.441589	0.00332212	0.579102	-0.437124	0.00419684	0.457325	-0.643259	0.0195667	0.27187	-0.638067	0.0234356	0.307491
ENSG00000138131	LOXL4	lysyl oxidase like 4 [Source:HGNC Symbol;Acc:HGNC:17171]	84171					0.4551	7.36709e-05	0.00647658	0.479988	1.27953e-05	0.00260783	0.355637	0.0022502	0.0268252	0.385592	0.000257804	0.00412955	0.197229	0.00179167	0.0410574	0.215987	0.000455311	0.0211504	-0.280714	0.0742411	0.770375	-0.301705	0.0508491	0.682706	-0.515815	0.0707842	0.3832	-0.524476	0.0637034	0.396789
ENSG00000132003	ZSWIM4	zinc finger SWIM-type containing 4 [Source:HGNC Symbol;Acc:HGNC:25704]	65249					0.170368	0.162352	0.253748	0.170224	0.139105	0.229993	0.363338	0.00225352	0.0268252	0.334377	0.00169256	0.0104763	0.0491372	0.458197	0.461227	0.0574783	0.365743	0.417515	-0.402502	0.00957937	0.632377	-0.321987	0.0368794	0.647868	-0.528922	0.0632259	0.372183	-0.45913	0.105312	0.452241
ENSG00000278053	DDX52	DExD-box helicase 52 [Source:HGNC Symbol;Acc:HGNC:20038]	11056	metabolic process				0.288812	0.0175657	0.0804953	0.285225	0.0122076	0.0628999	0.366221	0.00225355	0.0268252	0.323813	0.00240528	0.0126394	0.128635	0.0518343	0.179986	0.128037	0.0420478	0.159253	0.399191	0.0100837	0.63842	0.369584	0.0161769	0.574659	0.76883	0.00622476	0.217894	0.722682	0.00995838	0.253076
ENSG00000225791	TRAM2-AS1	TRAM2 antisense RNA 1 (head to head) [Source:HGNC Symbol;Acc:HGNC:48663]	401264					-0.165946	0.173861	0.263759	-0.171326	0.136534	0.227817	-0.363356	0.00226372	0.0268252	-0.338224	0.00148479	0.00970346	-0.110943	0.0919754	0.23109	-0.114802	0.0689384	0.200081	0.226751	0.158932	0.814915	0.219186	0.158054	0.784872	0.748723	0.00942072	0.233757	0.714713	0.0108401	0.254364
ENSG00000176422	SPRYD4	SPRY domain containing 4 [Source:HGNC Symbol;Acc:HGNC:27468]	283377				Hepatocytes	-0.198019	0.107861	0.207412	-0.21461	0.0612769	0.150844	-0.367463	0.00226496	0.0268252	-0.341643	0.00131982	0.00917286	-0.11651	0.0799661	0.217873	-0.124552	0.0480985	0.169533	0.259596	0.102778	0.794713	0.210136	0.176131	0.792551	0.999152	0.000375093	0.121603	0.966565	0.000466446	0.127109
ENSG00000109689	STIM2	stromal interaction molecule 2 [Source:HGNC Symbol;Acc:HGNC:19205]	57620	calcium ion transmembrane transport				0.440425	0.000177472	0.00879893	0.380517	0.000697416	0.0148177	0.361959	0.00226862	0.0268252	0.281579	0.0087255	0.0250191	0.207598	0.0012231	0.0349648	0.183388	0.00319797	0.0458849	0.155019	0.337477	0.846995	0.130992	0.400523	0.846035	0.276965	0.345333	0.584278	0.262993	0.355868	0.622123
ENSG00000118046	STK11	serine/threonine kinase 11 [Source:HGNC Symbol;Acc:HGNC:11389]	6794	protein phosphorylation; T cell receptor signaling pathway; negative regulation of cell proliferation; cell cycle arrest; canonical Wnt signaling pathway; negative regulation of cell growth; positive regulation of peptidyl-tyrosine phosphorylation				0.30541	0.0116509	0.0661884	0.220341	0.0545447	0.14247	0.364966	0.00227644	0.0268252	0.230022	0.0332656	0.05519	0.208104	0.00131655	0.0357924	0.16823	0.0070613	0.0684431	0.171789	0.287181	0.845772	0.173976	0.263476	0.824143	0.46015	0.115006	0.434452	0.478825	0.0909939	0.432983
ENSG00000214050	FBXO16	F-box protein 16 [Source:HGNC Symbol;Acc:HGNC:13618]	157574					0.199015	0.102233	0.20253	0.220467	0.0544039	0.142283	0.363193	0.00228344	0.0268252	0.345777	0.00114267	0.00854059	0.089147	0.177141	0.303794	0.104953	0.096856	0.234322	0.276485	0.078257	0.770375	0.300693	0.0516468	0.682706	0.450206	0.114955	0.434438	0.527494	0.0621637	0.39262
ENSG00000172482	AGXT	alanine--glyoxylate aminotransferase [Source:HGNC Symbol;Acc:HGNC:341]	189	small molecule metabolic process; cellular nitrogen compound metabolic process; response to glucocorticoid; response to cAMP		*	Hepatocytes	-0.259962	0.0285481	0.104589	-0.317638	0.00506654	0.0392232	-0.356188	0.00228387	0.0268252	-0.399097	0.000148971	0.00319653	-0.156724	0.0143606	0.101662	-0.182606	0.003337	0.0470168	0.254065	0.0871294	0.775245	0.297806	0.0539809	0.682706	0.508901	0.0586762	0.364397	0.595987	0.034605	0.338082
ENSG00000153904	DDAH1	dimethylarginine dimethylaminohydrolase 1 [Source:HGNC Symbol;Acc:HGNC:2715]	23576					-0.0395955	0.75154	0.537319	-0.0380719	0.742196	0.518949	-0.370203	0.00228544	0.0268252	-0.301281	0.00489265	0.0182712	0.00508856	0.940071	0.62304	0.00467865	0.94144	0.61369	0.354633	0.020648	0.682754	0.34421	0.0254164	0.608675	0.510612	0.0680559	0.380413	0.566269	0.0449441	0.366118
ENSG00000177888	ZBTB41	zinc finger and BTB domain containing 41 [Source:HGNC Symbol;Acc:HGNC:24819]	360023					0.27489	0.023491	0.0939661	0.298919	0.00851436	0.0510896	0.36427	0.00229303	0.0268252	0.358826	0.00071588	0.00659493	0.0948611	0.152073	0.287477	0.109868	0.08198	0.217279	-0.282561	0.0749764	0.770375	-0.225689	0.145943	0.782191	-0.195094	0.501687	0.653157	-0.141393	0.620207	0.722327
ENSG00000275152	CCL16	C-C motif chemokine ligand 16 [Source:HGNC Symbol;Acc:HGNC:10614]	6360	cellular response to tumor necrosis factor		*	Hepatocytes	-0.328768	0.0069781	0.0501587	-0.301712	0.00789531	0.0495657	-0.368008	0.00229548	0.0268252	-0.305728	0.00427058	0.0169958	-0.158734	0.0165279	0.107837	-0.148609	0.0178271	0.106148	0.29219	0.0674939	0.770375	0.283693	0.0666647	0.6834	0.252433	0.387863	0.604617	0.247769	0.384522	0.634832
ENSG00000146072	TNFRSF21	TNF receptor superfamily member 21 [Source:HGNC Symbol;Acc:HGNC:13469]	27242	T cell receptor signaling pathway; adaptive immune response				0.0815229	0.48668	0.44042	0.164565	0.152892	0.243729	0.34715	0.00229654	0.0268252	0.415217	7.50866e-05	0.00247704	0.00750458	0.905918	0.612767	0.0511165	0.421403	0.444159	-0.294571	0.0655314	0.770375	-0.304565	0.0486488	0.682706	-0.0428024	0.883953	0.758369	-0.0619581	0.828183	0.780542
ENSG00000114735	HEMK1	HemK methyltransferase family member 1 [Source:HGNC Symbol;Acc:HGNC:24923]	51409					0.00222664	0.985819	0.607144	-0.00295278	0.979652	0.584458	-0.370566	0.00229664	0.0268252	-0.305381	0.00431646	0.0170859	-0.0253236	0.708591	0.55399	-0.0255209	0.688512	0.546056	-0.191402	0.230906	0.833695	-0.182907	0.23958	0.818154	-0.331503	0.253333	0.540202	-0.344053	0.226334	0.551257
ENSG00000076944	STXBP2	syntaxin binding protein 2 [Source:HGNC Symbol;Acc:HGNC:11445]	6813	protein transport	vesicle docking involved in exocytosis; protein transport		monocytes	0.359191	0.00184811	0.0264626	0.410602	0.000234493	0.00933875	0.350689	0.00230016	0.0268252	0.405951	0.000111786	0.0028323	0.192971	0.00199915	0.041847	0.22184	0.00030887	0.0190194	-0.128151	0.422677	0.858648	-0.121761	0.434661	0.850091	-0.174171	0.548747	0.668981	-0.134672	0.636949	0.727067
ENSG00000160588	MPZL3	myelin protein zero like 3 [Source:HGNC Symbol;Acc:HGNC:27279]	196264	extracellular matrix organization; cell adhesion				0.294817	0.00896174	0.0571073	0.403819	0.000302372	0.0104245	0.339912	0.00231848	0.0269762	0.458484	1.00223e-05	0.00122887	0.163671	0.00726489	0.0762084	0.217961	0.000399978	0.0202435	0.250455	0.10128	0.792965	0.257722	0.0962452	0.722676	0.820822	0.0025996	0.1617	0.793464	0.00450271	0.219503
ENSG00000185432	METTL7A	methyltransferase like 7A [Source:HGNC Symbol;Acc:HGNC:24550]	25840	methylation			Hepatocytes	-0.244722	0.0435238	0.130435	-0.279857	0.0139983	0.0680162	-0.362315	0.00232865	0.0269762	-0.364097	0.000589405	0.00600351	-0.126254	0.054514	0.1846	-0.141927	0.0238493	0.122361	0.401986	0.00895362	0.61284	0.372471	0.0153378	0.574659	0.745668	0.00752843	0.222568	0.758451	0.00672911	0.243153
ENSG00000119844	AFTPH	aftiphilin [Source:HGNC Symbol;Acc:HGNC:25951]	54812	protein transport				0.0630386	0.612232	0.490217	0.0665401	0.565111	0.460635	0.367645	0.00232958	0.0269762	0.295004	0.00590767	0.0202704	0.0311039	0.643945	0.5343	0.0305945	0.630756	0.527456	-0.179744	0.248854	0.841179	-0.204342	0.188476	0.799509	-0.199725	0.481452	0.644992	-0.237389	0.404832	0.643679
ENSG00000204653	ASPDH	aspartate dehydrogenase domain containing [Source:HGNC Symbol;Acc:HGNC:33856]	554235	oxidation-reduction process		*	Hepatocytes	-0.268378	0.0229153	0.0926781	-0.300965	0.00805677	0.0499375	-0.353645	0.00233183	0.0269762	-0.364359	0.000583673	0.00598949	-0.139878	0.0286003	0.137845	-0.153764	0.0141243	0.0935198	0.361461	0.018741	0.675133	0.316464	0.0403203	0.665964	0.86692	0.00167156	0.144164	0.829485	0.00292164	0.192625
ENSG00000160282	FTCD	formimidoyltransferase cyclodeaminase [Source:HGNC Symbol;Acc:HGNC:3974]	10841	small molecule metabolic process; cellular nitrogen compound metabolic process		*	Hepatocytes | Cholangiocytes	-0.154544	0.196465	0.279607	-0.233528	0.0413384	0.121686	-0.354896	0.00234565	0.027028	-0.411401	8.8579e-05	0.00261132	-0.0736864	0.255518	0.355629	-0.11266	0.0743787	0.207024	-0.161631	0.308079	0.845772	-0.168283	0.279528	0.828115	-0.369717	0.198359	0.501616	-0.321777	0.258075	0.569024
ENSG00000136238	RAC1	Rac family small GTPase 1 [Source:HGNC Symbol;Acc:HGNC:9801]	5879	blood coagulation; Fc-gamma receptor signaling pathway involved in phagocytosis; actin cytoskeleton organization; platelet activation; intracellular signal transduction; cell adhesion; positive regulation of lamellipodium assembly; axon guidance; ephrin receptor signaling pathway; positive regulation of cell-substrate adhesion; small GTPase mediated signal transduction; regulation of small GTPase…				0.179103	0.141369	0.238089	0.234624	0.0403724	0.12065	0.361681	0.00234961	0.027028	0.381471	0.000303402	0.0044299	0.0896744	0.173912	0.302054	0.118035	0.0613419	0.190218	0.215034	0.177514	0.816199	0.160529	0.302419	0.831819	0.724522	0.0112431	0.237457	0.644231	0.0220916	0.305717
ENSG00000127831	VIL1	villin 1 [Source:HGNC Symbol;Acc:HGNC:12690]	7429					-0.435989	4.86402e-05	0.0057892	-0.528398	1.16153e-06	0.000656721	-0.33182	0.00235328	0.027028	-0.440898	2.34599e-05	0.00153769	-0.226014	0.000106205	0.0167511	-0.275295	4.84017e-06	0.0032514	-0.348073	0.0278205	0.697681	-0.341875	0.0264569	0.611579	-0.637507	0.0264595	0.292922	-0.633451	0.0244871	0.311327
ENSG00000156298	TSPAN7	tetraspanin 7 [Source:HGNC Symbol;Acc:HGNC:11854]	7102				Hepatic stellate cells	-0.193597	0.10621	0.205807	-0.120177	0.297821	0.339252	-0.356293	0.00235508	0.027028	-0.224855	0.0375361	0.0596795	-0.0647022	0.320586	0.393628	-0.0318861	0.616384	0.522566	0.441243	0.00328957	0.579102	0.485918	0.00137382	0.401719	0.210111	0.451228	0.634203	0.335495	0.238188	0.555761
ENSG00000008311	AASS	aminoadipate-semialdehyde synthase [Source:HGNC Symbol;Acc:HGNC:17366]	10157	small molecule metabolic process; oxidation-reduction process; cellular nitrogen compound metabolic process	oxidation-reduction process		Hepatocytes	-0.380782	0.000773474	0.01765	-0.458822	3.30641e-05	0.00426098	-0.344984	0.00236232	0.0270573	-0.429441	3.98652e-05	0.00203264	-0.1941	0.00160193	0.0398611	-0.237661	0.000101643	0.0117696	0.113174	0.478177	0.867072	0.0994674	0.523575	0.867256	0.26162	0.366141	0.595006	0.238391	0.402845	0.643045
ENSG00000204852	TCTN1	tectonic family member 1 [Source:HGNC Symbol;Acc:HGNC:26113]	79600					-0.298536	0.0131878	0.0700102	-0.246589	0.0309983	0.104674	-0.361346	0.0023792	0.0271052	-0.271843	0.0114508	0.0295287	-0.14862	0.022945	0.123687	-0.12503	0.0472277	0.168589	0.383147	0.0144584	0.638764	0.360691	0.0190152	0.576312	0.507794	0.0766101	0.39105	0.486757	0.0856814	0.426613
ENSG00000186111	PIP5K1C	phosphatidylinositol-4-phosphate 5-kinase type 1 gamma [Source:HGNC Symbol;Acc:HGNC:8996]	23396	actin cytoskeleton organization; phosphatidylinositol biosynthetic process; phosphatidylinositol phosphorylation; axon guidance; phospholipid metabolic process; platelet aggregation; neutrophil chemotaxis				0.147276	0.232266	0.304976	0.141792	0.218769	0.288561	0.364897	0.00238427	0.0271052	0.31101	0.0036241	0.0155247	0.12	0.0705519	0.205125	0.114458	0.0697904	0.200975	0.10344	0.510237	0.8698	0.113637	0.466029	0.856902	0.366819	0.196879	0.500831	0.329595	0.246606	0.562999
ENSG00000005238	ATOSB	atos homolog B [Source:HGNC Symbol;Acc:HGNC:25666]	80256				Erythroid cells	0.340051	0.00332381	0.0348409	0.357668	0.00149873	0.0214802	0.349752	0.0023904	0.0271052	0.360038	0.000684786	0.00646862	0.193206	0.00199292	0.041847	0.200072	0.00123185	0.032606	0.26268	0.092782	0.77938	0.210082	0.176244	0.792551	0.527576	0.0625148	0.370935	0.460006	0.104639	0.451734
ENSG00000139835	GRTP1	growth hormone regulated TBC protein 1 [Source:HGNC Symbol;Acc:HGNC:20310]	79774					-0.106087	0.387842	0.393738	-0.156659	0.173828	0.259558	-0.362779	0.0023922	0.0271052	-0.370021	0.000471871	0.0054363	-0.0699984	0.291803	0.377471	-0.091813	0.147105	0.280083	0.21118	0.18514	0.819411	0.251576	0.10457	0.73422	0.189009	0.515265	0.658279	0.233419	0.412764	0.646482
ENSG00000089902	RCOR1	REST corepressor 1 [Source:HGNC Symbol;Acc:HGNC:17441]	23186	blood coagulation; chromatin organization				0.0478474	0.700873	0.519825	0.0796908	0.490679	0.430371	0.367151	0.00239451	0.0271052	0.341422	0.00132995	0.00918088	0.0235131	0.727187	0.560766	0.0400121	0.529413	0.489855	0.293864	0.0669562	0.770375	0.279147	0.0712298	0.689855	0.566006	0.0517036	0.353162	0.546917	0.0529655	0.377668
ENSG00000147010	SH3KBP1	SH3 domain containing kinase binding protein 1 [Source:HGNC Symbol;Acc:HGNC:13867]	30011	regulation of cell shape; cell migration; endocytosis; cytoskeleton organization; negative regulation of epidermal growth factor receptor signaling pathway			monocytes	0.106945	0.36136	0.379801	0.21598	0.0596085	0.148711	0.345972	0.0023994	0.0271052	0.431024	3.7089e-05	0.00194898	0.0778232	0.218692	0.331483	0.126029	0.0454513	0.165526	-0.329978	0.0358719	0.728139	-0.348591	0.0235576	0.603423	-0.527972	0.0652192	0.375475	-0.550992	0.0511851	0.375914
ENSG00000196636	SDHAF3	succinate dehydrogenase complex assembly factor 3 [Source:HGNC Symbol;Acc:HGNC:21752]	57001					-0.0681065	0.577758	0.477348	-0.128921	0.263836	0.318293	-0.360671	0.00240414	0.0271052	-0.375544	0.00038209	0.00494391	-0.00390601	0.952989	0.626412	-0.0341634	0.591395	0.51321	-0.3568	0.0193224	0.678723	-0.395561	0.0098795	0.562223	-0.485785	0.0815261	0.399675	-0.541467	0.0554259	0.380372
ENSG00000189043	NDUFA4	NDUFA4 mitochondrial complex associated [Source:HGNC Symbol;Acc:HGNC:7687]	4697	small molecule metabolic process; respiratory electron transport chain; cellular metabolic process; mitochondrial electron transport, NADH to ubiquinone; hydrogen ion transmembrane transport				-0.17662	0.152805	0.246691	-0.168361	0.143535	0.233593	-0.365982	0.00240414	0.0271052	-0.311952	0.00351844	0.0153422	-0.0960684	0.150616	0.286027	-0.094261	0.136499	0.271411	0.217292	0.169372	0.816199	0.15029	0.334477	0.839975	0.547708	0.0551937	0.361464	0.492238	0.0821569	0.421773
ENSG00000165698	SPACA9	sperm acrosome associated 9 [Source:HGNC Symbol;Acc:HGNC:1367]	11092					-0.181142	0.135179	0.232345	-0.179269	0.119054	0.21238	-0.359115	0.00242397	0.0271742	-0.314572	0.00323903	0.0148137	-0.0895633	0.172631	0.3015	-0.0891094	0.159526	0.290197	0.214034	0.173722	0.816199	0.236642	0.127144	0.768854	0.580808	0.0407059	0.33152	0.593375	0.0354252	0.340403
ENSG00000168884	TNIP2	TNFAIP3 interacting protein 2 [Source:HGNC Symbol;Acc:HGNC:19118]	79155	toll-like receptor 9 signaling pathway; toll-like receptor 2 signaling pathway				0.199113	0.105049	0.204994	0.220065	0.0548548	0.142849	0.364044	0.0024389	0.0271742	0.353957	0.000854283	0.00721206	0.0965501	0.146934	0.283599	0.111619	0.077145	0.210794	0.0758413	0.640581	0.885285	0.062898	0.686896	0.8888	0.272899	0.35398	0.589871	0.248203	0.383686	0.634704
ENSG00000211455	STK38L	serine/threonine kinase 38 like [Source:HGNC Symbol;Acc:HGNC:17848]	23012	intracellular signal transduction; protein phosphorylation				0.322658	0.00695869	0.0500792	0.273103	0.0165715	0.0749767	0.358966	0.00244138	0.0271742	0.266671	0.0131805	0.0318399	0.129063	0.0481312	0.173659	0.10887	0.0848424	0.220051	-0.226435	0.151172	0.814915	-0.181811	0.242428	0.818437	-0.476587	0.0954713	0.41388	-0.399556	0.159425	0.509744
ENSG00000040531	CTNS	cystinosin, lysosomal cystine transporter [Source:HGNC Symbol;Acc:HGNC:2518]	1497					0.21567	0.0801581	0.177942	0.230237	0.0443554	0.127011	0.365679	0.00244146	0.0271742	0.344541	0.00119324	0.00874974	0.108727	0.10343	0.243531	0.11729	0.0630289	0.191576	0.277709	0.0801054	0.770751	0.28751	0.0630168	0.682706	0.14581	0.615667	0.690494	0.204797	0.472571	0.671053
ENSG00000169020	ATP5ME	ATP synthase membrane subunit e [Source:HGNC Symbol;Acc:HGNC:846]	521					-0.153219	0.21466	0.292342	-0.134529	0.243481	0.30558	-0.364743	0.00244239	0.0271742	-0.291859	0.00648329	0.0211179	-0.123766	0.0625027	0.195446	-0.110641	0.0798169	0.214274	-0.178393	0.262658	0.841179	-0.122483	0.431934	0.850091	-0.380367	0.187806	0.494327	-0.313189	0.271086	0.578202
ENSG00000182551	ADI1	acireductone dioxygenase 1 [Source:HGNC Symbol;Acc:HGNC:30576]	55256	small molecule metabolic process; oxidation-reduction process; cellular nitrogen compound metabolic process; sulfur amino acid metabolic process			Hepatocytes	-0.230911	0.0555013	0.148417	-0.266618	0.0194171	0.0814482	-0.358347	0.00244297	0.0271742	-0.358191	0.000732685	0.00662932	-0.127677	0.0502468	0.177435	-0.141677	0.0241043	0.122758	-0.231512	0.134144	0.803334	-0.290286	0.060467	0.682706	-0.482552	0.0848806	0.403675	-0.547459	0.0527259	0.377368
ENSG00000075945	KIFAP3	kinesin associated protein 3 [Source:HGNC Symbol;Acc:HGNC:17060]	22920	blood coagulation; signal transduction; negative regulation of cell proliferation; antigen processing and presentation of exogenous peptide antigen via MHC class II; membrane organization				0.0877505	0.454534	0.426304	0.151079	0.189826	0.271604	0.345607	0.00244329	0.0271742	0.377224	0.000358072	0.00478957	0.0237213	0.708994	0.554073	0.0518213	0.415006	0.440857	0.253573	0.113987	0.797116	0.23997	0.121816	0.760166	0.814711	0.00449598	0.192278	0.771317	0.00581774	0.232548
ENSG00000173621	LRFN4	leucine rich repeat and fibronectin type III domain containing 4 [Source:HGNC Symbol;Acc:HGNC:28456]	78999					-0.143434	0.248559	0.315502	-0.117964	0.306858	0.343911	-0.366887	0.00244854	0.0271802	-0.280584	0.00897495	0.0253254	-0.0424076	0.529458	0.490297	-0.0356258	0.575592	0.507513	0.359697	0.0201432	0.682673	0.337864	0.0283293	0.615781	1.04774	0.000130595	0.0910797	1.03308	0.000170594	0.108667
ENSG00000135956	TMEM127	transmembrane protein 127 [Source:HGNC Symbol;Acc:HGNC:26038]	55654	negative regulation of cell proliferation; endosome organization				0.287107	0.0178391	0.0811053	0.239035	0.0366737	0.114526	0.361933	0.00245895	0.0272433	0.280679	0.00895085	0.0252885	0.145567	0.0267298	0.133024	0.125335	0.0466796	0.167767	-0.34294	0.0283014	0.704216	-0.389006	0.0112219	0.563079	-0.667341	0.0185144	0.268936	-0.724795	0.00973541	0.253076
ENSG00000105607	GCDH	glutaryl-CoA dehydrogenase [Source:HGNC Symbol;Acc:HGNC:4189]	2639	small molecule metabolic process; cellular nitrogen compound metabolic process; fatty acid beta-oxidation using acyl-CoA dehydrogenase; lipid homeostasis			Hepatocytes	-0.195019	0.112855	0.212356	-0.22996	0.0446175	0.127572	-0.363851	0.00247758	0.027397	-0.364097	0.000589391	0.00600351	-0.129541	0.0507375	0.17816	-0.145756	0.0202158	0.112063	0.256526	0.106381	0.797116	0.259444	0.094008	0.719375	0.263169	0.364072	0.593727	0.261039	0.359469	0.623365
ENSG00000168092	PAFAH1B2	platelet activating factor acetylhydrolase 1b catalytic subunit 2 [Source:HGNC Symbol;Acc:HGNC:8575]	5049	spermatogenesis	lipid catabolic process			0.400676	0.000791449	0.0178898	0.388236	0.000532125	0.0131668	0.361677	0.00250249	0.0274972	0.328435	0.00206553	0.011686	0.235738	0.000240885	0.0204913	0.228184	0.00020002	0.0150384	-0.375592	0.0089917	0.61284	-0.422871	0.0056829	0.487795	-0.662027	0.0113114	0.237457	-0.778892	0.00533394	0.224515
ENSG00000117139	KDM5B	lysine demethylase 5B [Source:HGNC Symbol;Acc:HGNC:18039]	10765	chromatin organization				-0.0443016	0.711394	0.523817	0.0511933	0.658183	0.492809	0.35145	0.00250411	0.0274972	0.409074	9.78772e-05	0.00262523	-0.025282	0.696349	0.550309	0.0229392	0.718629	0.556232	0.186933	0.240889	0.836785	0.142519	0.360196	0.843033	0.17809	0.539507	0.665147	0.147713	0.604641	0.717313
ENSG00000177119	ANO6	anoctamin 6 [Source:HGNC Symbol;Acc:HGNC:25240]	196527	blood coagulation; calcium ion transmembrane transport; chloride transport; chloride transmembrane transport; positive regulation of apoptotic process; ion transmembrane transport	cation transport; transmembrane transport; chloride transmembrane transport; ion transmembrane transport; blood coagulation			0.332812	0.00494879	0.042097	0.326198	0.00395434	0.0346304	0.3553	0.00250632	0.0274972	0.340745	0.00136148	0.00926275	0.148875	0.0210769	0.120095	0.150708	0.0162293	0.101134	0.380206	0.0165865	0.665926	0.378587	0.0136841	0.563079	0.466728	0.108458	0.428552	0.487697	0.0850689	0.425782
ENSG00000198610	AKR1C4	aldo-keto reductase family 1 member C4 [Source:HGNC Symbol;Acc:HGNC:387]	1109	small molecule metabolic process; oxidation-reduction process; bile acid and bile salt transport; bile acid metabolic process; steroid metabolic process; androgen metabolic process; bile acid biosynthetic process; retinoid metabolic process	oxidation-reduction process	*	Hepatocytes	-0.356532	0.00261935	0.0316522	-0.388127	0.000534189	0.0131668	-0.356582	0.0025098	0.0274972	-0.371531	0.000445573	0.00528709	-0.176159	0.00622201	0.0696951	-0.191446	0.00203976	0.0388231	-0.314281	0.0393921	0.743933	-0.361253	0.018824	0.575376	-0.530776	0.0557659	0.362048	-0.600254	0.033299	0.335618
ENSG00000269858	EGLN2	egl-9 family hypoxia inducible factor 2 [Source:HGNC Symbol;Acc:HGNC:14660]	112398	positive regulation of protein catabolic process				0.275405	0.0223326	0.0915446	0.242036	0.0343226	0.110718	0.358882	0.0025105	0.0274972	0.29614	0.00571116	0.0199128	0.151439	0.0201764	0.117931	0.136426	0.0300352	0.136075	0.306431	0.0492509	0.768799	0.235306	0.129332	0.770693	0.816502	0.00345569	0.176159	0.749332	0.00744936	0.243153
ENSG00000269713	NBPF9	NBPF member 9 [Source:HGNC Symbol;Acc:HGNC:31991]	400818					0.230383	0.0595914	0.153991	0.240535	0.0354822	0.112478	0.362281	0.00251739	0.0275203	0.339444	0.00142391	0.00948618	0.11191	0.0914341	0.230571	0.117879	0.0616941	0.190474	0.195619	0.226785	0.832847	0.183154	0.238939	0.818154	0.765838	0.00811398	0.226034	0.74959	0.00742808	0.243153
ENSG00000163932	PRKCD	protein kinase C delta [Source:HGNC Symbol;Acc:HGNC:9399]	5580	blood coagulation; Fc-gamma receptor signaling pathway involved in phagocytosis; signal transduction; platelet activation; protein phosphorylation; vascular endothelial growth factor receptor signaling pathway; innate immune response; cell chemotaxis; cell cycle				0.173579	0.155987	0.249163	0.213315	0.0628883	0.153079	0.36059	0.00253743	0.0276744	0.372578	0.000428135	0.00521171	0.103052	0.119105	0.258965	0.124757	0.0477228	0.169212	-0.379321	0.016595	0.665926	-0.372936	0.0152062	0.574659	-0.539408	0.0623125	0.370843	-0.543887	0.054322	0.380372
ENSG00000084093	REST	RE1 silencing transcription factor [Source:HGNC Symbol;Acc:HGNC:9966]	5978	negative regulation of cell proliferation; positive regulation of apoptotic process; hematopoietic progenitor cell differentiation; chromatin organization; negative regulation of gene expression				0.0422376	0.727157	0.529834	0.112485	0.329998	0.356192	0.354774	0.00254335	0.0276744	0.387957	0.000234581	0.00394784	0.0113326	0.862671	0.601215	0.0446729	0.482462	0.470768	0.0933392	0.561088	0.875993	0.122429	0.432137	0.850091	0.339692	0.242669	0.53454	0.372019	0.190504	0.525999
ENSG00000178385	PLEKHM3	pleckstrin homology domain containing M3 [Source:HGNC Symbol;Acc:HGNC:34006]	389072	intracellular signal transduction				0.201569	0.0977259	0.197485	0.217389	0.0579329	0.146435	0.359358	0.00254667	0.0276744	0.320777	0.00265499	0.0132163	0.142654	0.0293768	0.139434	0.143874	0.0219369	0.116271	-0.327966	0.035656	0.727113	-0.319939	0.0381258	0.647868	-0.573181	0.0433724	0.337864	-0.552477	0.0505487	0.374262
ENSG00000141424	SLC39A6	solute carrier family 39 member 6 [Source:HGNC Symbol;Acc:HGNC:18607]	25800					-0.0446943	0.711006	0.523693	0.00224596	0.984522	0.585801	0.35341	0.00255348	0.0276744	0.346833	0.00110104	0.008363	-0.013235	0.839353	0.594029	0.00479244	0.940019	0.613342	0.203396	0.202019	0.825564	0.215774	0.164699	0.785315	0.136481	0.63866	0.698342	0.161152	0.572129	0.706206
ENSG00000011275	RNF216	ring finger protein 216 [Source:HGNC Symbol;Acc:HGNC:21698]	54476	proteasome-mediated ubiquitin-dependent protein catabolic process				0.130556	0.294574	0.341824	0.123555	0.284364	0.330737	0.365865	0.0025578	0.0276744	0.307889	0.00399461	0.0163484	0.0708644	0.293026	0.378115	0.0682042	0.282714	0.375682	0.126926	0.413803	0.858212	0.112263	0.471452	0.856902	0.655244	0.0184799	0.268859	0.644215	0.0220951	0.305717
ENSG00000143365	RORC	RAR related orphan receptor C [Source:HGNC Symbol;Acc:HGNC:10260]	6097	xenobiotic metabolic process; steroid hormone mediated signaling pathway			Hepatocytes	-0.297494	0.0100817	0.0604398	-0.367639	0.0010803	0.018762	-0.344942	0.00256035	0.0276744	-0.411914	8.66437e-05	0.00259416	-0.147522	0.0187291	0.113648	-0.181027	0.00363443	0.0489142	-0.131216	0.388665	0.854871	-0.135926	0.382944	0.843033	-0.400172	0.146086	0.467212	-0.460558	0.104218	0.451192
ENSG00000112033	PPARD	peroxisome proliferator activated receptor delta [Source:HGNC Symbol;Acc:HGNC:9235]	5467					0.103572	0.39772	0.399053	0.147481	0.200689	0.278362	0.359232	0.00256511	0.0276744	0.366714	0.000534524	0.00579401	0.0223125	0.736761	0.563658	0.0461636	0.467931	0.463889	0.549734	0.000344612	0.453152	0.566084	0.00016478	0.297567	0.949157	0.000696693	0.132253	0.974269	0.000416832	0.127109
ENSG00000160326	SLC2A6	solute carrier family 2 member 6 [Source:HGNC Symbol;Acc:HGNC:11011]	11182				monocytes | granulocytes	0.187563	0.119596	0.218941	0.234994	0.040051	0.120198	0.355051	0.00257631	0.0277064	0.386874	0.000244968	0.00404114	0.0530031	0.418613	0.44454	0.0826337	0.192422	0.31607	0.395258	0.0116113	0.63842	0.331771	0.0313877	0.628628	1.03385	0.000205857	0.105157	0.973597	0.000420957	0.127109
ENSG00000135547	HEY2	hes related family bHLH transcription factor with YRPW motif 2 [Source:HGNC Symbol;Acc:HGNC:4881]	23493		negative regulation of transcription from RNA polymerase II promoter		Smooth muscle cells	-0.426781	0.000241067	0.010263	-0.439741	7.41695e-05	0.00536997	-0.353139	0.00258979	0.0277064	-0.379788	0.000324071	0.0046193	-0.186736	0.00340445	0.0535689	-0.204223	0.000958041	0.0296702	-0.28171	0.0760905	0.770375	-0.288876	0.0617514	0.682706	-0.504835	0.080084	0.397826	-0.544626	0.0539888	0.380372
ENSG00000105287	PRKD2	protein kinase D2 [Source:HGNC Symbol;Acc:HGNC:17293]	25865	intracellular signal transduction; protein phosphorylation; cell adhesion; T cell receptor signaling pathway; positive regulation of cell adhesion; peptidyl-serine phosphorylation; positive regulation of NF-kappaB transcription factor activity; vascular endothelial growth factor receptor signaling pathway; adaptive immune response; positive regulation of peptidyl-serine phosphorylation	positive regulation of cell adhesion; positive regulation of interleukin-8 production; peptidyl-serine phosphorylation; positive regulation of NF-kappaB transcription factor activity; protein phosphorylation; protein autophosphorylation			0.343244	0.00483428	0.0415656	0.305406	0.00713764	0.0467938	0.364304	0.0025941	0.0277064	0.285016	0.00790982	0.0237053	0.18435	0.005171	0.0646791	0.166698	0.00762083	0.0706447	0.104421	0.513869	0.8698	0.10603	0.496483	0.860707	0.377219	0.192404	0.497782	0.378348	0.183	0.52266
ENSG00000113657	DPYSL3	dihydropyrimidinase like 3 [Source:HGNC Symbol;Acc:HGNC:3015]	1809	axon guidance; positive regulation of filopodium assembly; actin filament bundle assembly; positive regulation of neuron projection development; metabolic process				0.0967841	0.414764	0.40791	0.122414	0.288864	0.333341	0.347676	0.00259451	0.0277064	0.339261	0.00143287	0.00949674	0.0530139	0.408994	0.439747	0.0640929	0.31292	0.391427	0.0655093	0.679767	0.887384	0.0299205	0.847997	0.909926	0.421758	0.141043	0.461085	0.357925	0.208012	0.539603
ENSG00000123338	NCKAP1L	NCK associated protein 1 like [Source:HGNC Symbol;Acc:HGNC:4862]	3071	Fc-gamma receptor signaling pathway involved in phagocytosis; B cell homeostasis; positive regulation of GTPase activity; B cell receptor signaling pathway; small GTPase mediated signal transduction; positive regulation of actin filament polymerization; response to drug; chemotaxis; vascular endothelial growth factor receptor signaling pathway; innate immune response; neutrophil chemotaxis			Kupffer cells | monocytes | NK-cells | Macrophages | dendritic cells	0.233046	0.050164	0.140085	0.299838	0.00830612	0.0506673	0.351673	0.00260088	0.0277064	0.402803	0.000127645	0.00297024	0.146396	0.0224415	0.122868	0.180131	0.00381354	0.050415	0.222589	0.166213	0.815898	0.194511	0.210834	0.804938	0.667308	0.0209964	0.27423	0.636069	0.0238859	0.310088
ENSG00000160233	LRRC3	leucine rich repeat containing 3 [Source:HGNC Symbol;Acc:HGNC:14965]	81543				Hepatocytes	-0.189246	0.118622	0.218181	-0.216992	0.0584014	0.14727	-0.35695	0.00260318	0.0277064	-0.350668	0.000961135	0.00780697	-0.0909181	0.166472	0.297938	-0.103567	0.101414	0.239495	-0.281024	0.0787306	0.770375	-0.246799	0.111422	0.744062	-0.547964	0.0586907	0.364397	-0.479593	0.0904683	0.432637
ENSG00000114573	ATP6V1A	ATPase H+ transporting V1 subunit A [Source:HGNC Symbol;Acc:HGNC:851]	523	ion transmembrane transport	transmembrane transport; transport; interaction with host; ion transmembrane transport; transferrin transport; phagosome maturation			0.377533	0.00125894	0.021753	0.376408	0.000803376	0.0161364	0.352379	0.00260515	0.0277064	0.332042	0.00183116	0.0108437	0.242274	0.000106715	0.0167511	0.236702	0.000109022	0.0118147	0.213264	0.1802	0.816782	0.250427	0.106187	0.73849	0.219149	0.449792	0.634008	0.274125	0.335777	0.611645
ENSG00000117054	ACADM	acyl-CoA dehydrogenase medium chain [Source:HGNC Symbol;Acc:HGNC:89]	34	small molecule metabolic process; oxidation-reduction process; fatty acid beta-oxidation using acyl-CoA dehydrogenase; fatty acid beta-oxidation; lipid homeostasis; cellular lipid metabolic process	oxidation-reduction process			-0.340315	0.00392848	0.0375658	-0.364128	0.00121365	0.0198203	-0.353144	0.00260655	0.0277064	-0.356629	0.000775589	0.00685801	-0.157077	0.0145287	0.101892	-0.168521	0.00695915	0.0679249	0.161225	0.318129	0.845772	0.16112	0.300634	0.831819	0.625906	0.0310301	0.299139	0.601481	0.0329313	0.334064
ENSG00000166965	RCCD1	RCC1 domain containing 1 [Source:HGNC Symbol;Acc:HGNC:30457]	91433				Erythroid cells	-0.0479309	0.696885	0.518445	-0.0513354	0.657294	0.492616	-0.359716	0.00261298	0.0277127	-0.308388	0.00393319	0.016191	-0.0126185	0.849725	0.59705	-0.0175944	0.782314	0.575198	-0.336812	0.0339184	0.725558	-0.299399	0.0526824	0.682706	-0.564791	0.0505837	0.351821	-0.513087	0.069794	0.406912
ENSG00000100055	CYTH4	cytohesin 4 [Source:HGNC Symbol;Acc:HGNC:9505]	27128	positive regulation of GTPase activity			NK-cells | dendritic cells | Kupffer cells | granulocytes | Macrophages	0.343726	0.00433148	0.0393612	0.358355	0.00146579	0.0214412	0.360207	0.00261866	0.0277127	0.364856	0.000572976	0.00597061	0.179196	0.00606539	0.0689359	0.190424	0.00216184	0.0396914	0.248003	0.117808	0.797116	0.275751	0.0748033	0.696366	0.00768868	0.978844	0.776556	0.0760942	0.789802	0.769674
ENSG00000172331	BPGM	bisphosphoglycerate mutase [Source:HGNC Symbol;Acc:HGNC:1093]	669				Erythroid cells	0.301732	0.0127564	0.0687353	0.306883	0.00685318	0.0460263	0.360171	0.00262421	0.0277127	0.344951	0.00117624	0.0086534	0.102035	0.123622	0.263791	0.110909	0.0790769	0.213542	0.409392	0.00911563	0.61284	0.355133	0.0209985	0.584041	0.870539	0.00209259	0.15207	0.788704	0.00476056	0.221624
ENSG00000100991	TRPC4AP	transient receptor potential cation channel subfamily C member 4 associated protein [Source:HGNC Symbol;Acc:HGNC:16181]	26133	calcium ion transmembrane transport; ion transmembrane transport; protein ubiquitination				0.20051	0.104401	0.204322	0.200476	0.0807959	0.173307	0.363256	0.00263377	0.0277127	0.320777	0.00265499	0.0132163	0.105649	0.113932	0.25344	0.105629	0.0946928	0.231866	0.210453	0.182653	0.819411	0.181095	0.244301	0.818825	0.461649	0.106594	0.425949	0.44135	0.119696	0.469916
ENSG00000093217	XYLB	xylulokinase [Source:HGNC Symbol;Acc:HGNC:12839]	9942	generation of precursor metabolites and energy		*	Hepatocytes	-0.195973	0.099941	0.200161	-0.263394	0.0209813	0.0849309	-0.350464	0.00263811	0.0277127	-0.388565	0.000228932	0.00392602	-0.0988642	0.125439	0.265475	-0.129217	0.0401473	0.157123	0.189715	0.213414	0.828895	0.151183	0.331601	0.839558	0.633071	0.0208142	0.273433	0.568253	0.044182	0.363202
ENSG00000111670	GNPTAB	N-acetylglucosamine-1-phosphate transferase subunits alpha and beta [Source:HGNC Symbol;Acc:HGNC:29670]	79158				NK-cells	0.0880298	0.454739	0.426441	0.125537	0.276664	0.32619	0.344258	0.0026446	0.0277127	0.361715	0.000643791	0.00632705	0.0566896	0.373291	0.422432	0.0760335	0.23073	0.343044	-0.166781	0.299447	0.845772	-0.189056	0.224026	0.812385	-0.884052	0.00191417	0.147903	-0.87355	0.00167479	0.149713
ENSG00000204444	APOM	apolipoprotein M [Source:HGNC Symbol;Acc:HGNC:13916]	55937	high-density lipoprotein particle remodeling; cholesterol efflux; lipoprotein metabolic process; cholesterol homeostasis; retinoid metabolic process		*	Hepatocytes	-0.131779	0.272612	0.329711	-0.171231	0.136754	0.22791	-0.351803	0.0026447	0.0277127	-0.350742	0.000958606	0.00779873	-0.104488	0.1065	0.246574	-0.116832	0.0640851	0.192601	0.254867	0.104361	0.797116	0.290622	0.0601647	0.682706	0.270754	0.34443	0.584118	0.292803	0.303716	0.594592
ENSG00000078369	GNB1	G protein subunit beta 1 [Source:HGNC Symbol;Acc:HGNC:4396]	2782	blood coagulation; signal transduction; platelet activation; synaptic transmission				0.111736	0.347906	0.372275	0.196516	0.0870759	0.179974	0.348273	0.00264796	0.0277127	0.411021	9.00394e-05	0.00261132	0.049454	0.442966	0.454825	0.0903346	0.153804	0.285201	0.418493	0.00711766	0.605959	0.34388	0.0255611	0.608675	0.827795	0.00324528	0.173487	0.729996	0.00920511	0.253076
ENSG00000198670	LPA	lipoprotein(a) [Source:HGNC Symbol;Acc:HGNC:6667]	4018	small molecule metabolic process; lipoprotein metabolic process; lipid transport		*	Hepatocytes	-0.187233	0.127023	0.225896	-0.209462	0.0678858	0.159573	-0.360437	0.00265044	0.0277127	-0.333866	0.00172207	0.010539	-0.126422	0.0559439	0.186044	-0.136517	0.0299222	0.135901	-0.302636	0.0544853	0.770375	-0.29789	0.0539118	0.682706	-0.518088	0.070174	0.382303	-0.508242	0.072524	0.410761
ENSG00000156711	MAPK13	mitogen-activated protein kinase 13 [Source:HGNC Symbol;Acc:HGNC:6875]	5603	intracellular signal transduction; peptidyl-serine phosphorylation; vascular endothelial growth factor receptor signaling pathway; cell cycle				0.113983	0.31989	0.355335	0.203685	0.0759778	0.168479	0.335165	0.00266478	0.027777	0.414651	7.69601e-05	0.00247704	0.051007	0.411114	0.44083	0.0934807	0.139814	0.272953	-0.352579	0.0245074	0.687441	-0.376672	0.0141846	0.563079	-0.659349	0.0204291	0.27187	-0.686338	0.0145572	0.283282
ENSG00000143416	SELENBP1	selenium binding protein 1 [Source:HGNC Symbol;Acc:HGNC:10719]	8991				Erythroid cells | Hepatocytes	-0.238324	0.0417916	0.12767	-0.299707	0.00833555	0.0508021	-0.345474	0.00266885	0.027777	-0.395123	0.000175479	0.00343599	-0.109174	0.0858697	0.225035	-0.138475	0.0275884	0.130436	0.269629	0.0774164	0.770375	0.300948	0.0514448	0.682706	0.495745	0.0736997	0.387501	0.589364	0.0367168	0.345298
ENSG00000089639	GMIP	GEM interacting protein [Source:HGNC Symbol;Acc:HGNC:24852]	51291	intracellular signal transduction; positive regulation of GTPase activity; small GTPase mediated signal transduction; regulation of small GTPase mediated signal transduction			Kupffer cells | monocytes | Macrophages | B-cells | T-cells	0.136144	0.243975	0.312768	0.226117	0.0483874	0.13423	0.342053	0.00267105	0.027777	0.422706	5.39863e-05	0.00216773	0.0887244	0.159776	0.293086	0.132924	0.0346397	0.145848	-0.222601	0.165614	0.81556	-0.19545	0.208622	0.804938	-0.382416	0.189875	0.495693	-0.33147	0.243909	0.56116
ENSG00000134287	ARF3	ADP ribosylation factor 3 [Source:HGNC Symbol;Acc:HGNC:654]	377	phosphatidylinositol biosynthetic process; phospholipid metabolic process; small GTPase mediated signal transduction; protein transport				0.171083	0.150912	0.245494	0.140847	0.221879	0.29054	0.349141	0.00268969	0.0279204	0.27794	0.009669	0.0263038	0.0647483	0.316516	0.390423	0.0523877	0.409907	0.438814	0.238157	0.1368	0.803334	0.239939	0.121865	0.760166	0.551701	0.0566808	0.362048	0.585312	0.0380612	0.346789
ENSG00000165795	NDRG2	NDRG family member 2 [Source:HGNC Symbol;Acc:HGNC:14460]	57447					-0.377558	0.000965332	0.0198427	-0.425118	0.000133772	0.00772489	-0.343714	0.00269547	0.0279301	-0.395727	0.000171187	0.00339521	-0.199276	0.00130668	0.0357858	-0.222332	0.000298785	0.0187759	0.19866	0.193021	0.823189	0.271305	0.079696	0.700197	0.557224	0.0429142	0.337255	0.64611	0.0216955	0.305717
ENSG00000153086	ACMSD	aminocarboxymuconate semialdehyde decarboxylase [Source:HGNC Symbol;Acc:HGNC:19288]	130013	small molecule metabolic process; cellular nitrogen compound metabolic process		*	Hepatocytes | Cholangiocytes	-0.297098	0.0148882	0.0740679	-0.294096	0.00968413	0.0555328	-0.361349	0.00270696	0.027955	-0.328094	0.00208901	0.0117501	-0.153239	0.0204676	0.118503	-0.153074	0.0145777	0.0952477	-0.214805	0.17618	0.816199	-0.249891	0.106949	0.738558	-0.469182	0.102912	0.423394	-0.493915	0.0811023	0.421725
ENSG00000187867	PALM3	paralemmin 3 [Source:HGNC Symbol;Acc:HGNC:33274]	342979			*	Hepatocytes | Cholangiocytes	-0.18548	0.126202	0.225265	-0.231483	0.0431926	0.125482	-0.355557	0.00270863	0.027955	-0.373816	0.000408336	0.00507931	-0.118362	0.0705416	0.205125	-0.139661	0.0262511	0.128237	0.162371	0.309004	0.845772	0.183531	0.237968	0.817759	0.55788	0.0523854	0.355251	0.59414	0.0351832	0.33936
ENSG00000111700	SLCO1B3	solute carrier organic anion transporter family member 1B3 [Source:HGNC Symbol;Acc:HGNC:10961]	28234	small molecule metabolic process; bile acid and bile salt transport; bile acid metabolic process		*	Hepatocytes	-0.233238	0.0446909	0.131948	-0.328098	0.00373924	0.0334341	-0.342119	0.0027174	0.027955	-0.432577	3.45422e-05	0.00186863	-0.128045	0.0415842	0.162727	-0.173483	0.00540821	0.0599142	0.247199	0.117608	0.797116	0.252532	0.103239	0.733895	0.707754	0.0126313	0.246801	0.701799	0.012414	0.269186
ENSG00000140464	PML	PML nuclear body scaffold [Source:HGNC Symbol;Acc:HGNC:9113]	5371	negative regulation of cell proliferation; cell cycle arrest; intrinsic apoptotic signaling pathway in response to endoplasmic reticulum stress; response to cytokine; negative regulation of cell growth; innate immune response; transforming growth factor beta receptor signaling pathway; proteasome-mediated ubiquitin-dependent protein catabolic process				0.133034	0.280967	0.334093	0.145946	0.205459	0.280329	0.360273	0.00272718	0.027955	0.313407	0.00336072	0.0150037	0.0502985	0.451981	0.458695	0.0588404	0.354441	0.411235	0.179766	0.262078	0.841179	0.164513	0.29051	0.831819	0.621849	0.0309867	0.299139	0.627946	0.0257933	0.316386
ENSG00000154978	VOPP1	VOPP1 WW domain binding protein [Source:HGNC Symbol;Acc:HGNC:34518]	81552	signal transduction			Plasma cells	0.338746	0.00410783	0.0380998	0.328647	0.003679	0.0332677	0.35148	0.00273914	0.027955	0.326056	0.00223454	0.0121752	0.165607	0.009836	0.0879354	0.162043	0.00956833	0.0784754	0.210269	0.193337	0.82374	0.197651	0.203496	0.804498	0.945971	0.000939176	0.132253	0.930809	0.000775645	0.132342
ENSG00000164620	RELL2	RELT like 2 [Source:HGNC Symbol;Acc:HGNC:26902]	285613	positive regulation of cell-substrate adhesion				0.314043	0.00839236	0.0555039	0.322679	0.00438202	0.036366	0.353459	0.0027406	0.027955	0.347853	0.00106212	0.00812727	0.206925	0.00118572	0.034259	0.208477	0.000736083	0.0265323	0.256716	0.105675	0.797116	0.212054	0.172178	0.787588	0.47392	0.0998998	0.421412	0.412055	0.146634	0.499895
ENSG00000006015	REX1BD	required for excision 1-B domain containing [Source:HGNC Symbol;Acc:HGNC:26098]	55049					-0.188031	0.111949	0.211371	-0.247042	0.0306831	0.104277	-0.346492	0.00274772	0.027955	-0.394143	0.000182656	0.00348384	-0.096062	0.133704	0.272421	-0.125818	0.0458228	0.165979	0.21008	0.183995	0.819411	0.225708	0.145909	0.782191	0.545365	0.0561882	0.362048	0.566496	0.0448565	0.366118
ENSG00000104537	ANXA13	annexin A13 [Source:HGNC Symbol;Acc:HGNC:536]	312				Cholangiocytes	-0.266506	0.0298627	0.107162	-0.253036	0.0267594	0.0970339	-0.361635	0.00274903	0.027955	-0.302102	0.00477206	0.0179835	-0.147078	0.0266542	0.133004	-0.142093	0.0236801	0.122091	0.407195	0.00904597	0.61284	0.390679	0.0108651	0.563079	0.720984	0.0109954	0.237457	0.665161	0.0180091	0.298713
ENSG00000173992	CCS	copper chaperone for superoxide dismutase [Source:HGNC Symbol;Acc:HGNC:1613]	9973	oxidation-reduction process; response to reactive oxygen species				-0.253869	0.0342385	0.114309	-0.30205	0.00782326	0.0494184	-0.353035	0.00275797	0.027955	-0.387362	0.000240232	0.00401812	-0.133956	0.0390676	0.158616	-0.158354	0.0114083	0.0839189	0.358992	0.0238754	0.684653	0.351142	0.0225295	0.592495	0.749697	0.00903296	0.232001	0.74406	0.00789601	0.245811
ENSG00000131620	ANO1	anoctamin 1 [Source:HGNC Symbol;Acc:HGNC:21625]	55107				Smooth muscle cells | Hepatocytes	-0.313767	0.00842356	0.055599	-0.357201	0.00152152	0.0216499	-0.353046	0.00276192	0.027955	-0.379166	0.000332039	0.00465919	-0.166877	0.00965441	0.0878478	-0.186993	0.00262181	0.0421095	-0.240272	0.130101	0.802232	-0.224214	0.148627	0.782669	-0.595685	0.0376456	0.321397	-0.612388	0.02981	0.327837
ENSG00000118520	ARG1	arginase 1 [Source:HGNC Symbol;Acc:HGNC:663]	383	small molecule metabolic process; cellular nitrogen compound metabolic process; response to cadmium ion; response to drug		*	Hepatocytes	-0.255121	0.0340563	0.113859	-0.286636	0.0117716	0.0617973	-0.354345	0.00276431	0.027955	-0.355617	0.00080459	0.00696378	-0.132859	0.0415551	0.162697	-0.146431	0.0196274	0.110603	0.124058	0.431406	0.859198	0.163039	0.294879	0.831819	-0.00780143	0.9783	0.776326	0.0532137	0.852134	0.78621
ENSG00000007047	MARK4	microtubule affinity regulating kinase 4 [Source:HGNC Symbol;Acc:HGNC:13538]	57787	protein phosphorylation				0.0819192	0.507725	0.448346	0.0338287	0.770083	0.527101	0.359872	0.0027651	0.027955	0.244308	0.0235281	0.0446112	0.0434166	0.516469	0.485366	0.0213788	0.737046	0.561815	0.33061	0.0321536	0.71947	0.335767	0.0293518	0.619975	0.964587	0.000433489	0.128576	0.978274	0.000393002	0.127109
ENSG00000162819	BROX	BRO1 domain and CAAX motif containing [Source:HGNC Symbol;Acc:HGNC:26512]	148362					0.15572	0.183575	0.270786	0.241919	0.0344121	0.11081	0.341981	0.00276954	0.027955	0.405624	0.000113342	0.00283258	0.0929025	0.142121	0.28086	0.129938	0.0390229	0.155571	0.475641	0.00252293	0.579102	0.47626	0.00173082	0.426217	0.905308	0.00149998	0.141781	0.90754	0.00106744	0.136646
ENSG00000160339	FCN2	ficolin 2 [Source:HGNC Symbol;Acc:HGNC:3624]	2220			*	Hepatic stellate cells	-0.175296	0.128443	0.227184	-0.135036	0.241695	0.304149	-0.3372	0.00277542	0.027955	-0.248603	0.0211258	0.0419402	-0.0704653	0.260115	0.358325	-0.0484081	0.446507	0.454449	-0.229622	0.148149	0.814915	-0.238402	0.124304	0.764816	-0.389254	0.177337	0.489259	-0.382325	0.178395	0.521377
ENSG00000182196	ARL6IP4	ADP ribosylation factor like GTPase 6 interacting protein 4 [Source:HGNC Symbol;Acc:HGNC:18076]	51329					-0.0872106	0.47438	0.435073	-0.138829	0.228628	0.295922	-0.354666	0.00277709	0.027955	-0.369263	0.000485605	0.00552043	-0.0708392	0.281954	0.37083	-0.0929164	0.14225	0.27538	0.214782	0.180546	0.817393	0.186913	0.229364	0.812385	0.270159	0.354904	0.589871	0.257058	0.366878	0.627061
ENSG00000105325	FZR1	fizzy and cell division cycle 20 related 1 [Source:HGNC Symbol;Acc:HGNC:24824]	51343	positive regulation of protein catabolic process; positive regulation of cell proliferation				0.165961	0.172877	0.262825	0.128012	0.26724	0.320393	0.355578	0.00277818	0.027955	0.278525	0.00951146	0.0260819	0.05937	0.368922	0.419757	0.0501598	0.430176	0.447826	0.234601	0.14472	0.808638	0.211329	0.173665	0.788817	0.414554	0.155951	0.475696	0.372894	0.189453	0.525466
ENSG00000196504	PRPF40A	pre-mRNA processing factor 40 homolog A [Source:HGNC Symbol;Acc:HGNC:16463]	55660	regulation of cell shape; cell migration; cytoskeleton organization; cell cycle				0.192286	0.117482	0.216951	0.181841	0.113782	0.207763	0.359267	0.00278227	0.027955	0.310077	0.00373146	0.0157123	0.0684954	0.304643	0.383658	0.0667027	0.293512	0.382086	0.363282	0.022392	0.684653	0.31615	0.0405237	0.66719	0.876882	0.00212595	0.15207	0.811039	0.00365504	0.199762
ENSG00000152782	PANK1	pantothenate kinase 1 [Source:HGNC Symbol;Acc:HGNC:8598]	53354	small molecule metabolic process			Hepatocytes	-0.316895	0.00780874	0.0532536	-0.362035	0.00130014	0.0201597	-0.352978	0.00278521	0.027955	-0.380251	0.000318254	0.00456392	-0.152382	0.0185727	0.113556	-0.175065	0.0049827	0.057982	-0.407866	0.00828462	0.610017	-0.444768	0.00355208	0.457325	-0.412593	0.146855	0.468029	-0.478455	0.0912474	0.433524
ENSG00000074266	EED	embryonic ectoderm development [Source:HGNC Symbol;Acc:HGNC:3188]	8726	chromatin organization				0.256335	0.0365962	0.118414	0.246462	0.0310871	0.104777	0.3604	0.00280202	0.0279901	0.303859	0.00452291	0.017632	0.15132	0.0222493	0.122563	0.144178	0.0216505	0.115344	0.158779	0.321498	0.845772	0.142782	0.359304	0.843033	0.465812	0.107599	0.427183	0.48795	0.0849041	0.42546
ENSG00000060971	ACAA1	acetyl-CoA acyltransferase 1 [Source:HGNC Symbol;Acc:HGNC:82]	30	small molecule metabolic process; bile acid metabolic process; fatty acid beta-oxidation; cellular lipid metabolic process			Hepatocytes	-0.240583	0.0407463	0.12554	-0.299845	0.00830452	0.0506673	-0.345355	0.00280334	0.0279901	-0.385085	0.00026305	0.00412955	-0.130271	0.0405877	0.161014	-0.155912	0.0127907	0.0886621	0.144324	0.36325	0.852136	0.138673	0.373363	0.843033	0.291983	0.310791	0.568854	0.311035	0.274417	0.579728
ENSG00000198546	ZNF511	zinc finger protein 511 [Source:HGNC Symbol;Acc:HGNC:28445]	118472					-0.0768808	0.531401	0.457611	-0.138623	0.229325	0.29638	-0.356895	0.00280535	0.0279901	-0.377298	0.000357034	0.00478957	-0.0224726	0.735475	0.563207	-0.0534623	0.400333	0.434156	-0.156621	0.329215	0.845772	-0.116179	0.456082	0.853063	-0.737923	0.01009	0.235137	-0.696667	0.0130928	0.273413
ENSG00000166479	TMX3	thioredoxin related transmembrane protein 3 [Source:HGNC Symbol;Acc:HGNC:24718]	54495					0.169836	0.160562	0.252457	0.203631	0.0760568	0.1686	0.353166	0.00281168	0.0279901	0.349595	0.000998541	0.00796648	0.0887028	0.175748	0.30316	0.102338	0.105596	0.243228	0.334476	0.0337885	0.725558	0.311908	0.0433561	0.675607	0.89995	0.00139226	0.141376	0.869223	0.00177127	0.149713
ENSG00000099260	PALMD	palmdelphin [Source:HGNC Symbol;Acc:HGNC:15846]	54873				Endothelial cells	-0.307607	0.00974998	0.0594468	-0.358135	0.00147625	0.0214412	-0.351825	0.00282155	0.0279901	-0.388467	0.000229833	0.00392602	-0.16427	0.0107826	0.0911513	-0.18883	0.00236566	0.0409917	0.20417	0.205425	0.825564	0.169447	0.276193	0.828115	0.419093	0.151784	0.472282	0.388897	0.170974	0.518142
ENSG00000148346	LCN2	lipocalin 2 [Source:HGNC Symbol;Acc:HGNC:6526]	3934	response to drug; innate immune response				0.173606	0.157589	0.250553	0.123315	0.285307	0.331387	0.358311	0.00282447	0.0279901	0.256342	0.017325	0.0374243	0.0542938	0.415782	0.442915	0.0343711	0.589138	0.512274	-0.251577	0.117365	0.797116	-0.255066	0.0997768	0.729458	-0.733848	0.010946	0.237457	-0.717492	0.0105251	0.254306
ENSG00000115145	STAM2	signal transducing adaptor molecule 2 [Source:HGNC Symbol;Acc:HGNC:11358]	10254	endosomal transport; intracellular protein transport; membrane organization; negative regulation of epidermal growth factor receptor signaling pathway				0.129836	0.284064	0.335631	0.192886	0.0931659	0.18659	0.352654	0.00282576	0.0279901	0.379536	0.000327271	0.00463014	0.0434216	0.508745	0.482087	0.073436	0.247178	0.354265	0.303735	0.0534217	0.769953	0.299288	0.0527718	0.682706	0.59057	0.0383091	0.323754	0.572414	0.0426183	0.359408
ENSG00000044012	GUCA2B	guanylate cyclase activator 2B [Source:HGNC Symbol;Acc:HGNC:4683]	2981	excretion				-0.0798174	0.517042	0.452404	-0.0743308	0.520377	0.443216	-0.357674	0.00282765	0.0279901	-0.29446	0.00600382	0.0204351	-0.0512167	0.442032	0.454648	-0.0466964	0.462795	0.461812	-0.209095	0.182814	0.819411	-0.168836	0.277941	0.828115	-0.818026	0.00343546	0.176159	-0.729591	0.0092454	0.253076
ENSG00000100345	MYH9	myosin heavy chain 9 [Source:HGNC Symbol;Acc:HGNC:7579]	4627	regulation of cell shape; leukocyte migration; axon guidance; ephrin receptor signaling pathway; platelet aggregation; small GTPase mediated signal transduction; protein transport				0.314099	0.00975351	0.0594468	0.27264	0.0167619	0.0753752	0.359132	0.00283243	0.0279901	0.285623	0.00777294	0.0234764	0.129015	0.0516579	0.179737	0.115198	0.0679709	0.198599	-0.252008	0.115351	0.797116	-0.255252	0.0995255	0.729458	-0.597472	0.0387929	0.323933	-0.59252	0.0356973	0.340717
ENSG00000116266	STXBP3	syntaxin binding protein 3 [Source:HGNC Symbol;Acc:HGNC:11446]	6814	blood coagulation; platelet activation; platelet aggregation; membrane organization	blood coagulation; vesicle docking involved in exocytosis			0.351111	0.00228963	0.0296005	0.425595	0.000131276	0.00764446	0.342611	0.00284106	0.0280231	0.425739	4.71307e-05	0.00213356	0.166727	0.00781579	0.0789868	0.206114	0.000852773	0.0287657	-0.160861	0.308115	0.845772	-0.137581	0.377154	0.843033	-0.472956	0.0972513	0.416489	-0.431147	0.128607	0.479072
ENSG00000198099	ADH4	alcohol dehydrogenase 4 (class II), pi polypeptide [Source:HGNC Symbol;Acc:HGNC:252]	127	small molecule metabolic process; xenobiotic metabolic process; retinoid metabolic process		*	Hepatocytes	-0.290326	0.0148394	0.0740679	-0.340101	0.00260593	0.0277916	-0.351243	0.0028455	0.0280231	-0.383835	0.000276408	0.00422131	-0.14603	0.0238513	0.125869	-0.169801	0.00652564	0.0654271	0.244366	0.124427	0.798269	0.218457	0.159455	0.785315	0.705058	0.0136129	0.251853	0.679393	0.01562	0.287023
ENSG00000241224	C3orf85	chromosome 3 open reading frame 85 [Source:HGNC Symbol;Acc:HGNC:53432]	401081			*		-0.197904	0.102941	0.20328	-0.207921	0.0699724	0.161843	-0.354242	0.00285747	0.0280929	-0.335054	0.00165421	0.0103008	-0.0914073	0.16477	0.296472	-0.0981243	0.120956	0.257572	0.188043	0.23282	0.834814	0.170355	0.273613	0.828115	0.114575	0.689955	0.714058	0.159896	0.575133	0.706427
ENSG00000198589	LRBA	LPS responsive beige-like anchor protein [Source:HGNC Symbol;Acc:HGNC:1742]	987	endosomal transport				0.426223	0.000287336	0.0112249	0.417833	0.000177821	0.00816275	0.353194	0.00287164	0.0281841	0.32715	0.00215534	0.0119606	0.196061	0.00228768	0.0450438	0.193643	0.00179797	0.0369482	0.18155	0.256153	0.841179	0.140105	0.368425	0.843033	0.584614	0.0423541	0.334857	0.568176	0.0442116	0.363202
ENSG00000068308	OTUD5	OTU deubiquitinase 5 [Source:HGNC Symbol;Acc:HGNC:25402]	55593	innate immune response				0.173775	0.159273	0.251701	0.17231	0.134268	0.225886	0.359419	0.00287966	0.0282148	0.313367	0.00336498	0.0150037	0.0880841	0.187606	0.310459	0.0873785	0.167878	0.29791	0.182911	0.239736	0.835771	0.184142	0.236396	0.81583	0.476133	0.0905504	0.410885	0.52278	0.0645819	0.397508
ENSG00000139645	ANKRD52	ankyrin repeat domain 52 [Source:HGNC Symbol;Acc:HGNC:26614]	283373					0.263444	0.0289595	0.105463	0.21361	0.0625181	0.152544	0.35376	0.00289527	0.0282784	0.270325	0.0119365	0.0302537	0.109455	0.095383	0.23554	0.0896594	0.156938	0.288098	-0.293923	0.0578094	0.770375	-0.324791	0.0352289	0.644023	-0.409529	0.147187	0.468029	-0.409876	0.148806	0.501439
ENSG00000144597	EAF1	ELL associated factor 1 [Source:HGNC Symbol;Acc:HGNC:20907]	85403					0.0962565	0.434388	0.415819	0.106833	0.354997	0.369755	0.356878	0.00289597	0.0282784	0.322248	0.00253119	0.0129698	0.040349	0.54505	0.496769	0.0460531	0.468999	0.464277	0.267941	0.095061	0.780981	0.24533	0.113598	0.749622	0.56315	0.0526856	0.356008	0.550859	0.0512428	0.376049
ENSG00000151224	MAT1A	methionine adenosyltransferase 1A [Source:HGNC Symbol;Acc:HGNC:6903]	4143	small molecule metabolic process; cellular nitrogen compound metabolic process; xenobiotic metabolic process; one-carbon metabolic process; sulfur amino acid metabolic process; methylation; cellular amino acid metabolic process		*	Hepatocytes	-0.107803	0.366867	0.383124	-0.177793	0.122165	0.215075	-0.346284	0.00290992	0.0283665	-0.382088	0.000296134	0.00438224	-0.0682035	0.290951	0.377126	-0.097311	0.124109	0.26009	0.148942	0.354234	0.850281	0.122723	0.431029	0.850091	0.546643	0.0591672	0.36516	0.485769	0.086329	0.42821
ENSG00000130770	ATP5IF1	ATP synthase inhibitory factor subunit 1 [Source:HGNC Symbol;Acc:HGNC:871]	93974					-0.325712	0.00538143	0.0439565	-0.356018	0.00158067	0.0219947	-0.345629	0.00293654	0.0285777	-0.37596	0.000376008	0.00491208	-0.163826	0.00989736	0.0879354	-0.180947	0.00365016	0.0489511	0.275464	0.0764261	0.770375	0.26638	0.0854111	0.708518	0.887535	0.00133651	0.141376	0.909287	0.00104248	0.136646
ENSG00000249267	LINC00939	long intergenic non-protein coding RNA 939 [Source:HGNC Symbol;Acc:HGNC:48631]	400084			*		-0.363705	0.00242847	0.0306212	-0.335565	0.00299164	0.0299579	-0.355654	0.00294186	0.0285812	-0.313549	0.00334569	0.0150037	-0.166939	0.0106833	0.0910307	-0.160264	0.0104205	0.0812235	-0.515741	0.00070607	0.453152	-0.552328	0.000243572	0.309156	-0.427466	0.131946	0.452465	-0.463378	0.102084	0.445588
ENSG00000254087	LYN	LYN proto-oncogene, Src family tyrosine kinase [Source:HGNC Symbol;Acc:HGNC:6735]	4067	blood coagulation; Fc-gamma receptor signaling pathway involved in phagocytosis; signal transduction; platelet activation; protein phosphorylation; positive regulation of cell migration; leukocyte migration; platelet degranulation; axon guidance; negative regulation of cell proliferation; ephrin receptor signaling pathway; B cell homeostasis; B cell receptor signaling pathway; response to drug; t…			B-cells | Macrophages | monocytes | Kupffer cells	0.273773	0.0257047	0.0983842	0.276109	0.0153795	0.0717343	0.359535	0.00294699	0.0285828	0.336188	0.00159171	0.01007	0.100012	0.135077	0.273877	0.108953	0.0846012	0.219947	-0.256586	0.101134	0.792965	-0.286019	0.0644224	0.682706	-0.514975	0.0695006	0.381311	-0.530005	0.0609059	0.390889
ENSG00000139289	PHLDA1	pleckstrin homology like domain family A member 1 [Source:HGNC Symbol;Acc:HGNC:8933]	22822	positive regulation of apoptotic process				0.109031	0.367192	0.383158	0.175888	0.126272	0.219412	0.349853	0.00296218	0.0286229	0.38145	0.000303656	0.0044299	0.0426494	0.514913	0.48486	0.0738108	0.244756	0.353099	0.355132	0.0236208	0.684653	0.340009	0.0273145	0.615289	0.668757	0.0187836	0.270083	0.683035	0.0150545	0.286824
ENSG00000113758	DBN1	drebrin 1 [Source:HGNC Symbol;Acc:HGNC:2695]	1627	actin filament organization				0.185252	0.12834	0.227107	0.191819	0.0950195	0.188505	0.353981	0.00296374	0.0286229	0.327782	0.00211072	0.0118077	0.096043	0.145305	0.282397	0.10016	0.113332	0.250133	0.295624	0.0533578	0.769953	0.351939	0.0222166	0.589408	0.592023	0.0326958	0.304263	0.617605	0.0284079	0.325271
ENSG00000008382	MPND	MPN domain containing [Source:HGNC Symbol;Acc:HGNC:25934]	84954					-0.0572006	0.642196	0.49965	-0.115478	0.317225	0.349593	-0.355564	0.00296602	0.0286229	-0.367254	0.000523801	0.00573927	-0.0394988	0.553038	0.499303	-0.0654728	0.302557	0.386386	0.27926	0.0555438	0.770375	0.225486	0.14631	0.782191	0.465658	0.0792126	0.396016	0.316445	0.266102	0.575499
ENSG00000132964	CDK8	cyclin dependent kinase 8 [Source:HGNC Symbol;Acc:HGNC:1779]	1024	protein phosphorylation; Notch signaling pathway; protein ubiquitination; transforming growth factor beta receptor signaling pathway				0.226519	0.0615978	0.15712	0.249288	0.0291592	0.101183	0.353176	0.00297593	0.0286508	0.341669	0.00131864	0.00917286	0.119682	0.0680876	0.202739	0.130183	0.0386474	0.155131	0.449204	0.00374474	0.591752	0.431094	0.00477704	0.458048	0.94493	0.000705708	0.132253	0.933074	0.000751536	0.13056
ENSG00000136153	LMO7	LIM domain 7 [Source:HGNC Symbol;Acc:HGNC:6646]	4008					-0.334425	0.00559128	0.0445568	-0.360511	0.00136656	0.0205863	-0.355898	0.00297886	0.0286508	-0.366494	0.000538951	0.00580642	-0.185443	0.00446961	0.0610237	-0.19983	0.00124981	0.0327489	0.349162	0.0266304	0.688708	0.364097	0.0178813	0.574909	0.771262	0.00661522	0.220126	0.751794	0.00724847	0.243153
ENSG00000105329	TGFB1	transforming growth factor beta 1 [Source:HGNC Symbol;Acc:HGNC:11766]	7040	blood coagulation; extracellular matrix organization; platelet activation; protein phosphorylation; positive regulation of cell migration; platelet degranulation; negative regulation of cell proliferation; positive regulation of peptidyl-threonine phosphorylation; cell cycle arrest; Notch signaling pathway; positive regulation of apoptotic process; response to drug; lipopolysaccharide-mediated si…			T-cells | NK-cells | dendritic cells	0.142876	0.227743	0.301922	0.222422	0.0522558	0.13922	0.343087	0.0029868	0.0286793	0.402409	0.00012977	0.00297024	0.104521	0.101727	0.241912	0.140055	0.025819	0.127334	0.472272	0.00269012	0.579102	0.483884	0.00144292	0.401719	0.887131	0.00186816	0.147903	0.913767	0.000980874	0.136646
ENSG00000175155	YPEL2	yippee like 2 [Source:HGNC Symbol;Acc:HGNC:18326]	388403					0.0751099	0.544422	0.46273	0.0499174	0.666188	0.495643	0.357507	0.00301164	0.0287987	0.276219	0.0101453	0.0270671	0.0103026	0.877993	0.60575	0.00362117	0.95466	0.615716	0.211497	0.177001	0.816199	0.241334	0.119682	0.757504	0.515503	0.0687746	0.380413	0.592033	0.0358531	0.341397
ENSG00000182541	LIMK2	LIM domain kinase 2 [Source:HGNC Symbol;Acc:HGNC:6614]	3985	protein phosphorylation; spermatogenesis				0.18578	0.130097	0.228627	0.216229	0.0593097	0.148426	0.35602	0.0030132	0.0287987	0.358854	0.000715169	0.00659493	0.0551889	0.408069	0.439259	0.076527	0.227694	0.340379	0.281473	0.0796849	0.770751	0.289298	0.0613647	0.682706	0.562465	0.0533262	0.356364	0.564545	0.0456154	0.36757
ENSG00000080845	DLGAP4	DLG associated protein 4 [Source:HGNC Symbol;Acc:HGNC:24476]	22839					0.152909	0.205287	0.285883	0.20742	0.0706629	0.162704	0.349494	0.00301424	0.0287987	0.376629	0.000366409	0.00485069	0.105707	0.104564	0.24497	0.130831	0.0376666	0.152844	0.157872	0.320624	0.845772	0.164085	0.291775	0.831819	-0.208095	0.471526	0.642691	-0.163457	0.566634	0.703926
ENSG00000138688	BLTP1	bridge-like lipid transfer protein family member 1 [Source:HGNC Symbol;Acc:HGNC:26953]	84162					0.386007	0.000964079	0.0198427	0.383561	0.000627313	0.0137875	0.347353	0.00303279	0.028928	0.334078	0.0017098	0.010522	0.150009	0.019557	0.116599	0.156737	0.0123081	0.0866915	0.306615	0.0556143	0.770375	0.273166	0.077617	0.700197	0.0659516	0.822438	0.746886	0.0612384	0.830148	0.781008
ENSG00000178104	PDE4DIP	phosphodiesterase 4D interacting protein [Source:HGNC Symbol;Acc:HGNC:15580]	9659					0.105094	0.384471	0.392498	0.156687	0.173751	0.259543	0.34854	0.00305429	0.0290849	0.371294	0.00044962	0.00531064	0.0852497	0.191072	0.313082	0.107747	0.0881612	0.22487	-0.237894	0.135428	0.803334	-0.27218	0.0787133	0.700197	-0.387885	0.180571	0.490781	-0.419284	0.139597	0.491097
ENSG00000118898	PPL	periplakin [Source:HGNC Symbol;Acc:HGNC:9273]	5493					-0.200795	0.096457	0.195968	-0.266498	0.0194736	0.0815612	-0.350313	0.00306259	0.0291158	-0.386941	0.00024431	0.00404114	-0.0761981	0.24557	0.348307	-0.110408	0.0804649	0.215115	0.193398	0.227661	0.832847	0.154635	0.320621	0.83707	0.37331	0.199438	0.502957	0.335728	0.23786	0.555539
ENSG00000197746	PSAP	prosaposin [Source:HGNC Symbol;Acc:HGNC:9498]	5660	blood coagulation; platelet activation; platelet degranulation	glycosphingolipid metabolic process; blood coagulation; sphingolipid metabolic process; small molecule metabolic process		Macrophages | Kupffer cells	0.346769	0.00334367	0.0349336	0.337415	0.0028285	0.0289091	0.348278	0.00307757	0.0291244	0.321841	0.00256489	0.0130264	0.197423	0.00196178	0.041847	0.192544	0.0019154	0.0381846	0.13993	0.386215	0.854871	0.121812	0.434468	0.850091	0.411933	0.158611	0.47811	0.402679	0.156153	0.508828
ENSG00000032444	PNPLA6	patatin like phospholipase domain containing 6 [Source:HGNC Symbol;Acc:HGNC:16268]	10908		lipid catabolic process			0.393588	0.000525209	0.0148245	0.419044	0.000169676	0.00808881	0.337643	0.00308458	0.0291244	0.364351	0.000583856	0.00598949	0.214434	0.00047695	0.0246222	0.225485	0.000241057	0.0172935	0.141784	0.37975	0.854871	0.136351	0.381453	0.843033	0.553129	0.0571077	0.362814	0.557886	0.0482856	0.371765
ENSG00000182263	FIGN	fidgetin, microtubule severing factor [Source:HGNC Symbol;Acc:HGNC:13285]	55137					-0.258178	0.0293991	0.106352	-0.288861	0.0111113	0.0598731	-0.345443	0.00308521	0.0291244	-0.373226	0.000417661	0.00515084	-0.108721	0.091778	0.230749	-0.131645	0.0364646	0.14982	0.284196	0.0710207	0.770375	0.238026	0.124908	0.766034	0.663968	0.0194179	0.27187	0.583404	0.0387088	0.347609
ENSG00000008283	CYB561	cytochrome b561 [Source:HGNC Symbol;Acc:HGNC:2571]	1534					0.217416	0.068323	0.165294	0.165196	0.151306	0.241923	0.34618	0.00308647	0.0291244	0.262774	0.0146299	0.0339218	0.0922715	0.15428	0.288955	0.0734261	0.247243	0.354265	0.218541	0.171054	0.816199	0.177254	0.254525	0.822132	0.257805	0.375336	0.59877	0.227774	0.424196	0.649676
ENSG00000198483	ANKRD35	ankyrin repeat domain 35 [Source:HGNC Symbol;Acc:HGNC:26323]	148741					-0.0105686	0.930161	0.594417	-0.0802451	0.487659	0.429279	-0.346687	0.00308877	0.0291244	-0.375073	0.000389077	0.00496824	-0.0204358	0.754059	0.569792	-0.0502091	0.429721	0.447681	0.265196	0.0903646	0.77938	0.235911	0.128338	0.769533	0.528397	0.0626881	0.371098	0.525725	0.0630626	0.395923
ENSG00000132855	ANGPTL3	angiopoietin like 3 [Source:HGNC Symbol;Acc:HGNC:491]	27329	fatty acid metabolic process; triglyceride homeostasis; lipid homeostasis; cholesterol homeostasis		*	Hepatocytes	-0.226297	0.0583442	0.15232	-0.27065	0.0176023	0.0772674	-0.346721	0.00313063	0.0293641	-0.356553	0.00077772	0.00685801	-0.111327	0.0857644	0.224907	-0.129602	0.0395446	0.15638	-0.221641	0.156489	0.814915	-0.286493	0.0639722	0.682706	-0.4638	0.101826	0.422886	-0.510841	0.071049	0.407479
ENSG00000204843	DCTN1	dynactin subunit 1 [Source:HGNC Symbol;Acc:HGNC:2711]	1639	antigen processing and presentation of exogenous peptide antigen via MHC class II; retrograde transport, endosome to Golgi				0.242595	0.0444539	0.131762	0.230685	0.0439337	0.126377	0.350348	0.00315022	0.0293641	0.306174	0.00421222	0.0168314	0.107397	0.101402	0.241556	0.104037	0.0998516	0.238171	0.103683	0.522786	0.8698	0.0857837	0.582361	0.877498	0.403947	0.168514	0.484565	0.372881	0.189469	0.525466
ENSG00000163032	VSNL1	visinin like 1 [Source:HGNC Symbol;Acc:HGNC:12722]	7447					-0.361599	0.00268705	0.0319248	-0.383912	0.000619656	0.0137627	-0.354596	0.0031521	0.0293641	-0.360173	0.000681392	0.00646862	-0.167689	0.0106313	0.0906906	-0.182357	0.00338246	0.047389	-0.0671552	0.670115	0.887384	-0.0933705	0.549394	0.872256	-0.0763457	0.789759	0.740566	-0.118514	0.677934	0.742922
ENSG00000264569	DCXR-DT	DCXR divergent transcript [Source:HGNC Symbol;Acc:HGNC:54083]	113523640			*		-0.322176	0.00778895	0.0532182	-0.348525	0.0020062	0.025129	-0.354404	0.00315324	0.0293641	-0.362894	0.000616321	0.00616293	-0.181547	0.00549723	0.0666636	-0.195502	0.00161397	0.0364837	-0.0894602	0.575704	0.879234	-0.071493	0.646802	0.884515	-0.351328	0.22457	0.521829	-0.344429	0.225823	0.551094
ENSG00000122035	RASL11A	RAS like family 11 member A [Source:HGNC Symbol;Acc:HGNC:23802]	387496				Smooth muscle cells	-0.48396	1.57765e-05	0.00368877	-0.4343	9.26378e-05	0.00623245	-0.338875	0.00315328	0.0293641	-0.27363	0.0109008	0.0285269	-0.238263	9.99625e-05	0.0166378	-0.215002	0.000485459	0.021841	0.310449	0.0519366	0.76927	0.302801	0.0499961	0.682706	0.730096	0.0112022	0.237457	0.747772	0.00757911	0.243153
ENSG00000143845	ETNK2	ethanolamine kinase 2 [Source:HGNC Symbol;Acc:HGNC:25575]	55224	small molecule metabolic process			Hepatocytes	-0.234427	0.0541947	0.146283	-0.259698	0.0229067	0.0892768	-0.352967	0.00316038	0.0293641	-0.349098	0.00101634	0.00798587	-0.128611	0.0508494	0.178312	-0.140022	0.0258549	0.127334	0.11948	0.442785	0.861348	0.168772	0.278122	0.828115	0.532075	0.0576271	0.363699	0.534671	0.058624	0.386025
ENSG00000100422	CERK	ceramide kinase [Source:HGNC Symbol;Acc:HGNC:19256]	64781		glycosphingolipid metabolic process; sphingolipid metabolic process; small molecule metabolic process			0.394064	0.000595538	0.0153428	0.389244	0.000513419	0.0131668	0.340287	0.00316597	0.0293641	0.339832	0.00140499	0.00940881	0.182512	0.00359054	0.0553919	0.184937	0.00293783	0.0442186	-0.243344	0.126328	0.798269	-0.256148	0.0983259	0.729203	-0.258654	0.372958	0.59791	-0.300492	0.291121	0.588326
ENSG00000203724	C1orf53	chromosome 1 open reading frame 53 [Source:HGNC Symbol;Acc:HGNC:30003]	388722				Hepatocytes	-0.301009	0.0122885	0.0675304	-0.307214	0.00679074	0.045901	-0.350966	0.00316724	0.0293641	-0.32965	0.00198372	0.0114142	-0.132225	0.0433657	0.165913	-0.13636	0.0301166	0.136193	0.014201	0.929313	0.914586	0.000212503	0.998914	0.920508	0.281462	0.331616	0.579026	0.227284	0.425197	0.650134
ENSG00000078487	ZCWPW1	zinc finger CW-type and PWWP domain containing 1 [Source:HGNC Symbol;Acc:HGNC:23486]	55063					-0.131291	0.290539	0.339521	-0.126944	0.271279	0.322556	-0.357361	0.00316725	0.0293641	-0.307048	0.00410005	0.0165493	-0.0654928	0.330063	0.398948	-0.0666055	0.29422	0.382221	-0.19266	0.232335	0.834814	-0.163094	0.294715	0.831819	-0.455229	0.119081	0.437922	-0.425825	0.133452	0.485321
ENSG00000106683	LIMK1	LIM domain kinase 1 [Source:HGNC Symbol;Acc:HGNC:6613]	3984	Fc-gamma receptor signaling pathway involved in phagocytosis; actin cytoskeleton organization; signal transduction; protein phosphorylation; axon guidance; ephrin receptor signaling pathway; positive regulation of axon extension; small GTPase mediated signal transduction; innate immune response				0.193884	0.104908	0.204969	0.214909	0.0609093	0.150312	0.345447	0.00316991	0.0293641	0.340905	0.00135398	0.0092497	0.13266	0.0394017	0.159176	0.139228	0.0267332	0.129038	0.130399	0.402093	0.856092	0.0473671	0.76152	0.898133	0.481974	0.0860713	0.405435	0.397053	0.162084	0.510247
ENSG00000042088	TDP1	tyrosyl-DNA phosphodiesterase 1 [Source:HGNC Symbol;Acc:HGNC:18884]	55775					0.167445	0.159604	0.251965	0.232579	0.04219	0.123263	0.343328	0.00317025	0.0293641	0.394751	0.000178171	0.00344939	0.102849	0.109771	0.249102	0.13378	0.0334634	0.142683	0.381163	0.0128504	0.63842	0.284987	0.0654089	0.6834	0.627154	0.0246331	0.287898	0.542049	0.0551587	0.380372
ENSG00000111540	RAB5B	RAB5B, member RAS oncogene family [Source:HGNC Symbol;Acc:HGNC:9784]	5869	endosome organization; intracellular protein transport				0.13346	0.260567	0.322834	0.175283	0.127598	0.220609	0.341041	0.00320263	0.029566	0.351843	0.000921654	0.0075578	0.0299592	0.641665	0.533847	0.0516128	0.416892	0.441654	0.142204	0.377044	0.854871	0.111402	0.47487	0.856902	0.480099	0.0986238	0.419127	0.451284	0.111483	0.461714
ENSG00000173821	RNF213	ring finger protein 213 [Source:HGNC Symbol;Acc:HGNC:14539]	57674	protein ubiquitination			NK-cells	0.261816	0.0319937	0.110807	0.258775	0.0234104	0.0903757	0.354318	0.00320432	0.029566	0.31782	0.00292029	0.0139888	0.11184	0.0920604	0.231226	0.11264	0.0744304	0.207073	0.222762	0.15891	0.814915	0.202234	0.193119	0.800341	0.307496	0.285358	0.555999	0.252739	0.375018	0.629741
ENSG00000136883	KIF12	kinesin family member 12 [Source:HGNC Symbol;Acc:HGNC:21495]	113220				Cholangiocytes	-0.266106	0.0225496	0.0919902	-0.299107	0.00847134	0.0510896	-0.339053	0.00321384	0.029566	-0.37742	0.00035536	0.00478957	-0.129535	0.0407333	0.16118	-0.154463	0.0136774	0.0920449	0.234588	0.123244	0.798269	0.258435	0.0953138	0.720174	0.463977	0.0927662	0.413472	0.465772	0.100299	0.44252
ENSG00000157379	DHRS1	dehydrogenase/reductase 1 [Source:HGNC Symbol;Acc:HGNC:16445]	115817	oxidation-reduction process				-0.226043	0.0652903	0.161273	-0.231631	0.0430559	0.125256	-0.354528	0.00321859	0.029566	-0.321966	0.00255449	0.0130119	-0.0938631	0.158846	0.292508	-0.0977339	0.122461	0.259092	-0.244513	0.118703	0.797116	-0.261134	0.0918531	0.718749	-0.250729	0.380528	0.601472	-0.285337	0.316283	0.600418
ENSG00000169756	LIMS1	LIM zinc finger domain containing 1 [Source:HGNC Symbol;Acc:HGNC:6616]	3987	positive regulation of GTPase activity; positive regulation of cell-substrate adhesion; cell junction assembly			Macrophages	0.0119464	0.921134	0.591951	0.0713067	0.537527	0.450266	0.345442	0.00322278	0.029566	0.365534	0.000558662	0.00590509	0.031276	0.631685	0.53006	0.0560702	0.377657	0.422564	0.386668	0.0137192	0.638764	0.380473	0.0132064	0.563079	0.607833	0.0336557	0.308299	0.621203	0.0274739	0.322979
ENSG00000132846	ZBED3	zinc finger BED-type containing 3 [Source:HGNC Symbol;Acc:HGNC:20711]	84327					-0.344711	0.00384478	0.0372337	-0.30814	0.00661897	0.0452782	-0.349577	0.00322284	0.029566	-0.281247	0.00880813	0.025144	-0.143421	0.0277453	0.135958	-0.127893	0.0422835	0.159411	0.314225	0.0473071	0.765133	0.296283	0.0552464	0.682706	0.845406	0.00287935	0.16651	0.785844	0.00492174	0.221624
ENSG00000137880	GCHFR	GTP cyclohydrolase I feedback regulator [Source:HGNC Symbol;Acc:HGNC:4194]	2644	small molecule metabolic process		*	Hepatocytes	-0.0932183	0.44409	0.420514	-0.149176	0.195517	0.275187	-0.349217	0.003229	0.0295753	-0.363832	0.000595227	0.00602421	-0.0739388	0.260977	0.35859	-0.0960665	0.129056	0.264971	0.312266	0.0406475	0.743933	0.346983	0.0242257	0.606827	0.860906	0.00158126	0.141781	0.934811	0.000733524	0.130266
ENSG00000112685	EXOC2	exocyst complex component 2 [Source:HGNC Symbol;Acc:HGNC:24968]	55770	protein transport; membrane organization	protein transport			0.326376	0.00598639	0.0461698	0.379299	0.000727414	0.0151651	0.347131	0.00323955	0.0296023	0.389078	0.000224267	0.00388002	0.174257	0.00671541	0.0724744	0.200069	0.00123205	0.032606	-0.313376	0.0430114	0.754722	-0.314664	0.0414976	0.670087	-0.390959	0.167057	0.484565	-0.422394	0.136649	0.488124
ENSG00000119699	TGFB3	transforming growth factor beta 3 [Source:HGNC Symbol;Acc:HGNC:11769]	7043	blood coagulation; extracellular matrix organization; platelet activation; platelet degranulation; negative regulation of cell proliferation; positive regulation of filopodium assembly; positive regulation of apoptotic process; transforming growth factor beta receptor signaling pathway			Fibroblasts | Smooth muscle cells	0.0127451	0.914785	0.590519	0.0265445	0.818625	0.541138	0.34078	0.00324222	0.0296023	0.310129	0.00372548	0.0157065	-0.0043165	0.946598	0.624492	0.00469843	0.941193	0.613654	0.568521	0.000214069	0.453152	0.581591	0.000104579	0.283278	0.67822	0.0174216	0.267303	0.65918	0.0191035	0.301011
ENSG00000169418	NPR1	natriuretic peptide receptor 1 [Source:HGNC Symbol;Acc:HGNC:7943]	4881				Hepatic stellate cells | Endothelial cells	-0.0176508	0.883166	0.5807	-0.0117576	0.919106	0.569105	-0.343456	0.00326134	0.0296955	-0.280204	0.00907202	0.0254598	-0.00263667	0.967638	0.629916	0.00113054	0.985838	0.62384	0.0870801	0.581721	0.880652	0.0308548	0.84331	0.909926	0.341879	0.232128	0.526004	0.30793	0.279268	0.582737
ENSG00000100596	SPTLC2	serine palmitoyltransferase long chain base subunit 2 [Source:HGNC Symbol;Acc:HGNC:11278]	9517					0.0574327	0.641329	0.499612	0.10781	0.350595	0.367322	0.352725	0.003263	0.0296955	0.356273	0.000785677	0.00688903	0.0536163	0.420961	0.444794	0.0751521	0.236223	0.346972	-0.282914	0.0686126	0.770375	-0.29515	0.0562029	0.682706	-0.406248	0.151322	0.472051	-0.477399	0.0919758	0.433989
ENSG00000107537	PHYH	phytanoyl-CoA 2-hydroxylase [Source:HGNC Symbol;Acc:HGNC:8940]	5264	small molecule metabolic process; cellular lipid metabolic process				-0.127206	0.289852	0.339049	-0.204414	0.0749152	0.167085	-0.344599	0.00327514	0.0296955	-0.389481	0.000220661	0.00385205	-0.0774469	0.233247	0.340116	-0.111407	0.0777168	0.211752	0.399539	0.0122277	0.63842	0.385511	0.0120008	0.563079	0.853391	0.00299406	0.167478	0.823299	0.00315136	0.192625
ENSG00000198157	HMGN5	high mobility group nucleosome binding domain 5 [Source:HGNC Symbol;Acc:HGNC:8013]	79366					-0.289451	0.0184949	0.0824407	-0.285467	0.0121317	0.0626512	-0.35662	0.00329138	0.0296955	-0.31795	0.00290817	0.0139575	-0.137796	0.0389201	0.158386	-0.138511	0.027547	0.130399	0.385391	0.0159407	0.658556	0.364853	0.0176377	0.574659	0.78886	0.00634021	0.217894	0.750406	0.00736111	0.243153
ENSG00000130592	LSP1	lymphocyte specific protein 1 [Source:HGNC Symbol;Acc:HGNC:6707]	4046	signal transduction; chemotaxis; movement of cell or subcellular component			monocytes | NK-cells	0.0104687	0.930763	0.594506	0.0673446	0.560409	0.458916	0.344135	0.0032989	0.0296955	0.358121	0.00073457	0.00662932	0.0373226	0.566629	0.505528	0.0636037	0.316648	0.393507	-0.184728	0.249588	0.841179	-0.153531	0.324107	0.838145	-0.557696	0.0539394	0.35815	-0.497092	0.0791333	0.419678
ENSG00000100099	HPS4	HPS4 biogenesis of lysosomal organelles complex 3 subunit 2 [Source:HGNC Symbol;Acc:HGNC:15844]	89781	blood coagulation	blood coagulation			0.382277	0.00153185	0.0241742	0.3624	0.00128464	0.0201597	0.354505	0.00329963	0.0296955	0.317387	0.00296109	0.0140873	0.128883	0.0524131	0.181156	0.127475	0.0429783	0.160151	0.320228	0.040972	0.743933	0.304215	0.0489133	0.682706	0.618619	0.0294157	0.29904	0.626511	0.0261434	0.316386
ENSG00000153201	RANBP2	RAN binding protein 2 [Source:HGNC Symbol;Acc:HGNC:9848]	5903	small GTPase mediated signal transduction; mRNA transport				0.213747	0.0782825	0.175732	0.212638	0.0637433	0.154346	0.349766	0.00330167	0.0296955	0.315864	0.00310867	0.014512	0.115894	0.0776461	0.214531	0.118	0.0614214	0.190218	0.324903	0.0353547	0.727113	0.346527	0.0244184	0.606827	0.855475	0.00196132	0.148312	0.826675	0.00302406	0.192625
ENSG00000099284	MACROH2A2	macroH2A.2 histone [Source:HGNC Symbol;Acc:HGNC:14453]	55506				Fibroblasts	0.386723	0.00075113	0.0175867	0.453804	4.10671e-05	0.0046966	0.338263	0.00331504	0.0296955	0.419928	6.10674e-05	0.00231237	0.155097	0.0138494	0.100513	0.194911	0.00167053	0.0364837	0.281418	0.078532	0.770375	0.261553	0.0913248	0.718584	0.273955	0.34864	0.585728	0.222319	0.435415	0.654665
ENSG00000206535	LNP1	leukemia NUP98 fusion partner 1 [Source:HGNC Symbol;Acc:HGNC:28014]	348801					-0.277584	0.0171923	0.0796767	-0.318921	0.00488391	0.0384544	-0.337964	0.00331858	0.0296955	-0.3857	0.000256701	0.00412955	-0.120048	0.0583385	0.189236	-0.150099	0.0166793	0.102964	-0.406369	0.00826784	0.610017	-0.385801	0.0119346	0.563079	-0.294615	0.299767	0.564403	-0.348138	0.220825	0.548029
ENSG00000181555	SETD2	SET domain containing 2, histone lysine methyltransferase [Source:HGNC Symbol;Acc:HGNC:18420]	29072	chromatin organization				0.105235	0.39431	0.397066	0.0636784	0.581988	0.466577	0.353351	0.00331955	0.0296955	0.248657	0.0210968	0.0419312	0.0323731	0.628644	0.528859	0.0151321	0.812173	0.582535	0.184445	0.237937	0.835338	0.182799	0.239858	0.818154	0.487591	0.0843613	0.403373	0.54027	0.0559785	0.380687
ENSG00000177576	C18orf32	chromosome 18 open reading frame 32 [Source:HGNC Symbol;Acc:HGNC:31690]	497661					-0.2123	0.0813261	0.178371	-0.180711	0.116075	0.210069	-0.350533	0.00333276	0.0296955	-0.282309	0.00854632	0.0248232	-0.0557907	0.400358	0.435781	-0.0467114	0.46265	0.46176	-0.110264	0.480954	0.868053	-0.176315	0.257068	0.822586	-0.294255	0.299508	0.564212	-0.331641	0.243664	0.561005
ENSG00000087299	L2HGDH	L-2-hydroxyglutarate dehydrogenase [Source:HGNC Symbol;Acc:HGNC:20499]	79944	small molecule metabolic process; oxidation-reduction process; cellular metabolic process				-0.130217	0.28702	0.337173	-0.183531	0.110417	0.204205	-0.349978	0.0033433	0.0296955	-0.36337	0.000605528	0.00609048	-0.0533746	0.420561	0.444794	-0.0808205	0.202455	0.322691	0.19706	0.221468	0.832847	0.180373	0.2462	0.819377	0.398508	0.172865	0.486474	0.397921	0.161157	0.510247
ENSG00000163687	DNASE1L3	deoxyribonuclease 1 like 3 [Source:HGNC Symbol;Acc:HGNC:2959]	1776				Hepatic stellate cells | Endothelial cells	-0.267546	0.0207257	0.0883087	-0.209832	0.0673921	0.15906	-0.334968	0.0033453	0.0296955	-0.235159	0.0294324	0.0508354	-0.0922397	0.144182	0.28181	-0.065282	0.303976	0.386486	0.162766	0.31012	0.845772	0.156747	0.314019	0.835677	0.701237	0.0146004	0.251853	0.729441	0.00926039	0.253076
ENSG00000150722	PPP1R1C	protein phosphatase 1 regulatory inhibitor subunit 1C [Source:HGNC Symbol;Acc:HGNC:14940]	151242					-0.219117	0.0760541	0.173317	-0.228248	0.046265	0.130696	-0.355428	0.00334646	0.0296955	-0.326487	0.00220306	0.0120823	-0.0997614	0.136523	0.274912	-0.10664	0.0915286	0.227852	0.223628	0.162496	0.815036	0.193336	0.213627	0.804938	0.347047	0.233293	0.526995	0.288928	0.310197	0.597559
ENSG00000136754	ABI1	abl interactor 1 [Source:HGNC Symbol;Acc:HGNC:11320]	10006	Fc-gamma receptor signaling pathway involved in phagocytosis; negative regulation of cell proliferation; small GTPase mediated signal transduction; transmembrane receptor protein tyrosine kinase signaling pathway; vascular endothelial growth factor receptor signaling pathway; movement of cell or subcellular component; innate immune response				0.0894226	0.45729	0.427619	0.181087	0.115308	0.209122	0.34364	0.00334651	0.0296955	0.402494	0.000129309	0.00297024	0.0543621	0.403426	0.437171	0.0970531	0.125122	0.261619	0.435837	0.0060253	0.605959	0.426227	0.00529631	0.477464	0.645497	0.0261685	0.292358	0.625909	0.0262915	0.316386
ENSG00000004961	HCCS	holocytochrome c synthase [Source:HGNC Symbol;Acc:HGNC:4837]	3052					0.185367	0.130196	0.228627	0.181215	0.115048	0.209	0.35162	0.00334699	0.0296955	0.294902	0.00592566	0.0202704	0.0871555	0.189199	0.311796	0.084323	0.183402	0.309409	0.185513	0.214215	0.828895	0.127596	0.412895	0.848016	0.491831	0.0683497	0.380413	0.390641	0.169043	0.516526
ENSG00000166024	R3HCC1L	R3H domain and coiled-coil containing 1 like [Source:HGNC Symbol;Acc:HGNC:23512]	27291					0.2572	0.0261918	0.099454	0.340972	0.00253722	0.0277638	0.334532	0.00335248	0.0296955	0.415872	7.29724e-05	0.00247704	0.0935138	0.13822	0.276435	0.137372	0.0288835	0.133537	-0.220214	0.170239	0.816199	-0.181029	0.244476	0.818825	-0.229961	0.431944	0.628325	-0.206015	0.469934	0.67053
ENSG00000139874	SSTR1	somatostatin receptor 1 [Source:HGNC Symbol;Acc:HGNC:11330]	6751	cellular response to estradiol stimulus; response to nutrient; response to starvation			Hepatic stellate cells	-0.0771403	0.494663	0.442905	-0.190342	0.0976311	0.191385	-0.322503	0.00335465	0.0296955	-0.435315	3.04453e-05	0.00178166	-0.0261506	0.668994	0.541166	-0.0848397	0.180706	0.306821	-0.326332	0.0417258	0.748986	-0.326586	0.0342054	0.641907	-0.739048	0.010561	0.235137	-0.744418	0.00786492	0.245811
ENSG00000175336	APOF	apolipoprotein F [Source:HGNC Symbol;Acc:HGNC:615]	319	lipid transport	lipid transport	*	Hepatocytes	-0.364786	0.00210393	0.0284964	-0.362972	0.00126077	0.0200841	-0.347408	0.00335532	0.0296955	-0.312449	0.00346383	0.0152071	-0.19406	0.00252169	0.0471761	-0.190596	0.00214083	0.0396914	-0.342386	0.0206028	0.682754	-0.379335	0.0134928	0.563079	-0.569394	0.0344252	0.311666	-0.61728	0.0284937	0.325271
ENSG00000123575	FAM199X	family with sequence similarity 199, X-linked [Source:HGNC Symbol;Acc:HGNC:25195]	139231					0.166931	0.159044	0.251698	0.239095	0.0366251	0.114516	0.339882	0.00335551	0.0296955	0.394447	0.000180401	0.00345878	0.072077	0.262066	0.359379	0.106971	0.0905101	0.226713	-0.106169	0.498484	0.8698	-0.169549	0.275902	0.828115	-0.422154	0.136308	0.457418	-0.505127	0.0743239	0.413979
ENSG00000075618	FSCN1	fascin actin-bundling protein 1 [Source:HGNC Symbol;Acc:HGNC:11148]	6624	actin cytoskeleton organization; positive regulation of lamellipodium assembly; cell migration; positive regulation of filopodium assembly; actin filament bundle assembly			monocytes	0.103593	0.399532	0.399596	0.134935	0.24205	0.304362	0.351242	0.00336188	0.0297063	0.337317	0.00153157	0.0098959	0.0369292	0.57929	0.511347	0.0543056	0.392914	0.429946	-0.245283	0.113883	0.797116	-0.219233	0.157964	0.784872	-0.296686	0.294203	0.560487	-0.275345	0.333619	0.611388
ENSG00000110328	GALNT18	polypeptide N-acetylgalactosaminyltransferase 18 [Source:HGNC Symbol;Acc:HGNC:30488]	374378		protein glycosylation			0.349529	0.00380738	0.0372337	0.322935	0.00434959	0.0362879	0.35242	0.00337958	0.0298169	0.311235	0.0035986	0.0155001	0.161265	0.0142411	0.101217	0.157362	0.0119533	0.0857943	0.196285	0.222325	0.832847	0.176416	0.256791	0.822207	0.430079	0.140084	0.460265	0.44276	0.118502	0.469916
ENSG00000156398	SFXN2	sideroflexin 2 [Source:HGNC Symbol;Acc:HGNC:16086]	118980					-0.227948	0.0615698	0.15712	-0.268028	0.0187649	0.0801575	-0.350799	0.00338883	0.0298528	-0.35568	0.000802746	0.00696378	-0.1159	0.0793239	0.217071	-0.136502	0.0299403	0.135901	-0.257795	0.10646	0.797116	-0.274513	0.0761399	0.699728	-0.547911	0.0581163	0.363699	-0.537397	0.0573234	0.384461
ENSG00000163528	CHCHD4	coiled-coil-helix-coiled-coil-helix domain containing 4 [Source:HGNC Symbol;Acc:HGNC:26467]	131474	oxidation-reduction process				-0.203351	0.0912723	0.189724	-0.155584	0.176831	0.26183	-0.345663	0.00340126	0.0299165	-0.248787	0.0210278	0.041891	-0.0228123	0.728278	0.560918	-0.0124898	0.844516	0.589978	-0.277644	0.0829454	0.770751	-0.251488	0.104695	0.73422	-0.18448	0.528854	0.661736	-0.13245	0.642524	0.729901
ENSG00000166669	ATF7IP2	activating transcription factor 7 interacting protein 2 [Source:HGNC Symbol;Acc:HGNC:20397]	80063					-0.105551	0.384063	0.392249	-0.147565	0.200431	0.278245	-0.345838	0.00341892	0.0300261	-0.343539	0.00123569	0.00888136	-0.0514293	0.433313	0.450227	-0.0680546	0.283777	0.376188	0.161433	0.314685	0.845772	0.117679	0.450268	0.852214	0.555491	0.054871	0.360635	0.498483	0.0782834	0.418804
ENSG00000183386	FHL3	four and a half LIM domains 3 [Source:HGNC Symbol;Acc:HGNC:3704]	2275	actin cytoskeleton organization	actin cytoskeleton organization		granulocytes	0.338913	0.00439056	0.0396475	0.284537	0.0124254	0.0634109	0.34639	0.00342595	0.0300419	0.261815	0.0150069	0.0343629	0.2009	0.00171244	0.0404502	0.173734	0.00533867	0.0596727	-0.288535	0.0691685	0.770375	-0.319424	0.0384444	0.647868	-0.32835	0.257464	0.541526	-0.381031	0.179884	0.522099
ENSG00000186517	ARHGAP30	Rho GTPase activating protein 30 [Source:HGNC Symbol;Acc:HGNC:27414]	257106	positive regulation of GTPase activity; small GTPase mediated signal transduction; regulation of small GTPase mediated signal transduction			Kupffer cells | Macrophages | dendritic cells | NK-cells | monocytes | T-cells	0.248073	0.039164	0.122822	0.262537	0.021415	0.0858783	0.346313	0.0034339	0.030066	0.347505	0.00107525	0.00820336	0.153486	0.0179085	0.111998	0.16488	0.00833541	0.0736836	0.254097	0.113216	0.797116	0.231835	0.135153	0.772292	0.844377	0.00317902	0.172961	0.788471	0.00477352	0.221624
ENSG00000092036	HAUS4	HAUS augmin like complex subunit 4 [Source:HGNC Symbol;Acc:HGNC:20163]	54930					-0.384924	0.00123392	0.0216856	-0.402623	0.000316068	0.0107294	-0.34879	0.00346005	0.0301642	-0.361281	0.000654167	0.00636428	-0.19559	0.00250118	0.0469508	-0.208028	0.000757051	0.0267658	-0.108619	0.472468	0.866535	-0.140159	0.368239	0.843033	0.0515499	0.851247	0.752796	0.0823615	0.772939	0.765065
ENSG00000159685	CHCHD6	coiled-coil-helix-coiled-coil-helix domain containing 6 [Source:HGNC Symbol;Acc:HGNC:28184]	84303					-0.177957	0.149602	0.244785	-0.167828	0.144824	0.235083	-0.353098	0.00346232	0.0301642	-0.294039	0.00607922	0.0205424	-0.0938682	0.160218	0.293313	-0.0907651	0.15183	0.283526	0.125755	0.421284	0.858428	0.123236	0.429099	0.850091	0.64248	0.0218739	0.277125	0.666941	0.0176941	0.296603
ENSG00000184470	TXNRD2	thioredoxin reductase 2 [Source:HGNC Symbol;Acc:HGNC:18155]	10587	oxidation-reduction process; response to reactive oxygen species				0.0374618	0.757793	0.539539	-0.0464321	0.688245	0.503034	-0.345298	0.00346841	0.0301642	-0.383185	0.000283598	0.00427036	0.00626313	0.924104	0.618284	-0.0316336	0.619182	0.523431	-0.349036	0.0275075	0.697681	-0.33363	0.0304263	0.624376	-0.111071	0.703093	0.71678	-0.142804	0.616719	0.721271
ENSG00000100985	MMP9	matrix metallopeptidase 9 [Source:HGNC Symbol;Acc:HGNC:7176]	4318	extracellular matrix organization; endodermal cell differentiation; leukocyte migration; axon guidance; ephrin receptor signaling pathway; extracellular matrix disassembly			Macrophages	0.115977	0.332559	0.362847	0.18267	0.112121	0.206142	0.340989	0.00347299	0.0301642	0.384584	0.000268339	0.0041498	0.0492967	0.446992	0.456577	0.0813816	0.199311	0.320746	0.095444	0.55347	0.874693	0.0969137	0.534314	0.868501	0.350552	0.22923	0.524538	0.356759	0.209509	0.540158
ENSG00000213886	UBD	ubiquitin D [Source:HGNC Symbol;Acc:HGNC:18795]	10537	positive regulation of apoptotic process; protein ubiquitination			monocytes	0.103838	0.406401	0.403316	0.0913112	0.429496	0.405703	0.356028	0.00347584	0.0301642	0.287235	0.00741948	0.0229481	0.00879293	0.896813	0.611009	0.00746249	0.906724	0.605875	-0.277083	0.0669984	0.770375	-0.360428	0.0191053	0.576312	-0.161617	0.559659	0.671358	-0.247737	0.384584	0.634832
ENSG00000135441	BLOC1S1	biogenesis of lysosomal organelles complex 1 subunit 1 [Source:HGNC Symbol;Acc:HGNC:4200]	2647					-0.0539497	0.659368	0.506632	-0.110224	0.339862	0.362101	-0.347801	0.00348784	0.0301642	-0.365189	0.000565901	0.00594747	-0.0385383	0.560439	0.502474	-0.0646888	0.308417	0.388971	0.19133	0.215002	0.828895	0.102253	0.511986	0.865006	0.478318	0.0865428	0.406286	0.360581	0.204627	0.53743
ENSG00000152620	NADK2	NAD kinase 2, mitochondrial [Source:HGNC Symbol;Acc:HGNC:26404]	133686				Hepatocytes	-0.253075	0.0322693	0.111162	-0.301858	0.00786415	0.0495657	-0.340077	0.00349103	0.0301642	-0.370755	0.000458915	0.00535896	-0.117475	0.0671847	0.201791	-0.140154	0.0257115	0.127334	0.131961	0.381154	0.854871	0.110697	0.477676	0.856902	0.127978	0.640489	0.698797	0.0422208	0.882433	0.792004
ENSG00000182518	FAM104B	family with sequence similarity 104 member B [Source:HGNC Symbol;Acc:HGNC:25085]	90736					-0.114637	0.352554	0.374453	-0.119106	0.302175	0.341368	-0.35102	0.00349372	0.0301642	-0.314748	0.00322099	0.0147837	-0.0640149	0.337247	0.404142	-0.070907	0.263952	0.364289	-0.248913	0.12099	0.797116	-0.244775	0.114428	0.749729	-0.353255	0.226787	0.52345	-0.358471	0.207313	0.539603
ENSG00000008083	JARID2	jumonji and AT-rich interaction domain containing 2 [Source:HGNC Symbol;Acc:HGNC:6196]	3720	negative regulation of cell proliferation				-0.0615873	0.615357	0.491138	0.00560352	0.961397	0.579374	0.348294	0.00349584	0.0301642	0.367127	0.000526306	0.00575442	-0.0265873	0.688581	0.548136	0.0054401	0.931931	0.612053	0.341074	0.0310046	0.71547	0.309911	0.0447458	0.675607	0.587539	0.0409986	0.331552	0.595832	0.034653	0.338201
ENSG00000103429	BFAR	bifunctional apoptosis regulator [Source:HGNC Symbol;Acc:HGNC:17613]	51283	protein ubiquitination involved in ubiquitin-dependent protein catabolic process; proteasome-mediated ubiquitin-dependent protein catabolic process				0.151623	0.220954	0.297586	0.139699	0.225701	0.293822	0.353174	0.00350239	0.0301642	0.29698	0.00556963	0.0196859	0.0496377	0.460162	0.46256	0.0513182	0.419566	0.443215	0.307093	0.0493624	0.768799	0.362039	0.0185591	0.575376	0.81027	0.00382131	0.177456	0.839173	0.00259197	0.180772
ENSG00000157870	PRXL2B	peroxiredoxin like 2B [Source:HGNC Symbol;Acc:HGNC:28390]	127281				Endothelial cells	0.356427	0.00239566	0.0302671	0.348366	0.00201624	0.025129	0.342079	0.00350271	0.0301642	0.332967	0.00177507	0.0107165	0.212717	0.00075415	0.0281967	0.209999	0.000668837	0.0250874	0.213044	0.186217	0.820111	0.196632	0.205858	0.804834	0.537805	0.0648363	0.375475	0.51834	0.066929	0.40129
ENSG00000139132	FGD4	FYVE, RhoGEF and PH domain containing 4 [Source:HGNC Symbol;Acc:HGNC:19125]	121512					-0.28896	0.0162623	0.077622	-0.293104	0.00994169	0.0563648	-0.346971	0.00350803	0.0301649	-0.333867	0.001722	0.010539	-0.148843	0.0223682	0.122736	-0.152621	0.0148821	0.0966327	0.213919	0.17359	0.816199	0.238804	0.123662	0.763274	0.348029	0.223252	0.520741	0.416725	0.142057	0.49436
ENSG00000071575	TRIB2	tribbles pseudokinase 2 [Source:HGNC Symbol;Acc:HGNC:30809]	28951					0.138334	0.263487	0.324537	0.122088	0.290159	0.334056	0.35228	0.00352005	0.0302231	0.278948	0.00939888	0.0259389	0.0528625	0.430506	0.449396	0.0497617	0.433857	0.449824	0.326434	0.0401647	0.743933	0.278865	0.0715215	0.689855	0.655583	0.0228551	0.277673	0.596557	0.034428	0.337281
ENSG00000152382	TADA1	transcriptional adaptor 1 [Source:HGNC Symbol;Acc:HGNC:30631]	117143					-0.376156	0.00166349	0.025015	-0.378263	0.000753855	0.0155474	-0.348882	0.00353768	0.0303212	-0.347294	0.0010833	0.00825261	-0.169964	0.00923774	0.0864419	-0.180619	0.00371512	0.0496421	0.378419	0.0146751	0.640497	0.347312	0.0240877	0.606827	0.676197	0.0163893	0.261357	0.589031	0.0368259	0.345681
ENSG00000174943	KCTD13	potassium channel tetramerization domain containing 13 [Source:HGNC Symbol;Acc:HGNC:22234]	253980	cell migration; protein ubiquitination; proteasome-mediated ubiquitin-dependent protein catabolic process				0.0753091	0.528801	0.456854	0.159827	0.1652	0.2531	0.339436	0.003542	0.0303212	0.378554	0.000340048	0.00472013	0.0721912	0.263307	0.360272	0.105132	0.0962801	0.233755	0.370549	0.0171054	0.665926	0.330268	0.0321834	0.63767	0.450929	0.11327	0.43436	0.433061	0.126898	0.477334
ENSG00000106400	ZNHIT1	zinc finger HIT-type containing 1 [Source:HGNC Symbol;Acc:HGNC:21688]	10467				Hepatocytes	-0.157268	0.195514	0.278921	-0.208503	0.0691788	0.161028	-0.345959	0.00356278	0.0304282	-0.370395	0.00046524	0.0054047	-0.0819916	0.212453	0.327032	-0.106447	0.0921248	0.228742	0.276576	0.0831413	0.770751	0.238951	0.12343	0.762467	0.678363	0.0183961	0.268491	0.661891	0.0186004	0.300502
ENSG00000089220	PEBP1	phosphatidylethanolamine binding protein 1 [Source:HGNC Symbol;Acc:HGNC:8630]	5037					-0.237954	0.0463391	0.134093	-0.285543	0.0121081	0.062615	-0.342266	0.00356884	0.0304282	-0.367587	0.000517283	0.00572879	-0.118307	0.0676317	0.202206	-0.139718	0.0261884	0.12807	0.339704	0.0238395	0.684653	0.399567	0.0091304	0.538257	0.320761	0.244994	0.534597	0.422858	0.136213	0.487632
ENSG00000124374	PAIP2B	poly(A) binding protein interacting protein 2B [Source:HGNC Symbol;Acc:HGNC:29200]	400961				Hepatocytes	-0.341865	0.00454099	0.0402902	-0.36797	0.00106843	0.0186964	-0.349163	0.00357415	0.0304282	-0.36038	0.000676242	0.00644484	-0.158127	0.0159187	0.106359	-0.174585	0.00510847	0.0588627	0.384225	0.0137418	0.638764	0.365743	0.0173545	0.574659	0.62866	0.0269093	0.292922	0.646082	0.0217011	0.305717
ENSG00000163590	PPM1L	protein phosphatase, Mg2+/Mn2+ dependent 1L [Source:HGNC Symbol;Acc:HGNC:16381]	151742	small molecule metabolic process				-0.094754	0.433926	0.415488	-0.145336	0.207375	0.281414	-0.343573	0.00358278	0.0304282	-0.348858	0.00102503	0.00798587	-0.0395172	0.546698	0.497591	-0.0614302	0.333558	0.401649	-0.16398	0.306682	0.845772	-0.189691	0.222461	0.812385	-0.353053	0.22493	0.521849	-0.39739	0.161723	0.510247
ENSG00000064419	TNPO3	transportin 3 [Source:HGNC Symbol;Acc:HGNC:17103]	23534					0.41719	0.000425974	0.0131979	0.371658	0.000944101	0.0175045	0.347293	0.00358648	0.0304282	0.279272	0.00931372	0.0258146	0.191084	0.00315792	0.0517555	0.171866	0.00587603	0.0623398	0.306146	0.050752	0.76927	0.307177	0.0467078	0.680192	0.123167	0.668373	0.705796	0.118198	0.678745	0.743356
ENSG00000117791	MTARC2	mitochondrial amidoxime reducing component 2 [Source:HGNC Symbol;Acc:HGNC:26064]	54996				Smooth muscle cells | Fibroblasts	-0.249798	0.0358516	0.116872	-0.307682	0.00670355	0.0456315	-0.341339	0.00358748	0.0304282	-0.374307	0.000400706	0.00502007	-0.118526	0.0665097	0.200784	-0.144918	0.0209675	0.113839	0.0739722	0.647744	0.885285	0.0707192	0.650372	0.884515	-0.114756	0.696323	0.71513	-0.0872006	0.75999	0.763503
ENSG00000099364	FBXL19	F-box and leucine rich repeat protein 19 [Source:HGNC Symbol;Acc:HGNC:25300]	54620	protein ubiquitination; proteasome-mediated ubiquitin-dependent protein catabolic process				0.0822153	0.499147	0.444814	0.0622109	0.590731	0.470305	0.344916	0.00359147	0.0304282	0.278636	0.00948171	0.0260451	0.0566371	0.389139	0.430159	0.0462313	0.467276	0.463779	0.302381	0.0574552	0.770375	0.301413	0.0510781	0.682706	0.729001	0.0109931	0.237457	0.721249	0.0101121	0.253076
ENSG00000119760	SUPT7L	SPT7 like, STAGA complex subunit gamma [Source:HGNC Symbol;Acc:HGNC:30632]	9913	chromatin organization				0.19913	0.0982451	0.198197	0.217952	0.0572729	0.145857	0.34345	0.00361652	0.0305615	0.331696	0.00185257	0.0109032	0.0931146	0.153837	0.288631	0.101381	0.108944	0.245882	-0.161078	0.293215	0.845772	-0.22463	0.147866	0.782669	-0.486348	0.0788023	0.396016	-0.576378	0.041172	0.355688
ENSG00000154144	TBRG1	transforming growth factor beta regulator 1 [Source:HGNC Symbol;Acc:HGNC:29551]	84897	negative regulation of cell proliferation; cell cycle arrest				0.320084	0.00758889	0.0527841	0.32944	0.00359365	0.0330273	0.346144	0.00361983	0.0305615	0.338622	0.00146467	0.00964539	0.112538	0.08645	0.22544	0.121657	0.0536574	0.178076	-0.16613	0.29225	0.845772	-0.219344	0.15775	0.784872	-0.384225	0.178906	0.48984	-0.437896	0.122658	0.471428
ENSG00000152359	POC5	POC5 centriolar protein [Source:HGNC Symbol;Acc:HGNC:26658]	134359	cell cycle				0.180207	0.132476	0.23028	0.20336	0.0764549	0.169104	0.340988	0.00363246	0.0305615	0.303377	0.00459007	0.017689	0.116847	0.0705998	0.205125	0.120856	0.0552849	0.180599	0.0752336	0.632771	0.885285	0.0828218	0.595473	0.87903	0.514379	0.0695281	0.381311	0.529219	0.0612975	0.39124
ENSG00000196116	TDRD7	tudor domain containing 7 [Source:HGNC Symbol;Acc:HGNC:30831]	23424	spermatogenesis				0.180536	0.145864	0.241806	0.174811	0.12864	0.221335	0.353198	0.00363599	0.0305615	0.293279	0.00621743	0.0207491	0.0482709	0.474369	0.468417	0.0505933	0.426188	0.446412	-0.28509	0.0659247	0.770375	-0.336633	0.0289261	0.617819	-0.51361	0.0681166	0.380413	-0.580979	0.0395445	0.34965
ENSG00000156671	SAMD8	sterile alpha motif domain containing 8 [Source:HGNC Symbol;Acc:HGNC:26320]	142891					0.060971	0.62175	0.493337	0.104607	0.365159	0.374653	0.349724	0.00363696	0.0305615	0.346406	0.00111769	0.00842733	0.0308894	0.644132	0.534327	0.0524623	0.409238	0.438766	0.378546	0.0123328	0.63842	0.384438	0.0122493	0.563079	0.527511	0.0566185	0.362048	0.559411	0.0476628	0.370942
ENSG00000169826	CSGALNACT2	chondroitin sulfate N-acetylgalactosaminyltransferase 2 [Source:HGNC Symbol;Acc:HGNC:24292]	55454	glycosaminoglycan metabolic process			Macrophages	0.0439326	0.711156	0.523697	0.136046	0.238167	0.302495	0.33562	0.00363903	0.0305615	0.400743	0.00013912	0.0030617	0.0294032	0.646844	0.535345	0.0709172	0.263883	0.364263	0.207681	0.187376	0.822077	0.18349	0.238073	0.81786	0.30018	0.294861	0.56109	0.30364	0.286063	0.58564
ENSG00000023516	AKAP11	A-kinase anchoring protein 11 [Source:HGNC Symbol;Acc:HGNC:369]	11215	intracellular signal transduction				0.243315	0.0369012	0.118998	0.266352	0.019542	0.0817249	0.333705	0.00365123	0.0306193	0.334044	0.00171173	0.010522	0.104233	0.100062	0.240273	0.115115	0.0681713	0.198948	0.396186	0.0109869	0.63842	0.425769	0.00534762	0.477464	0.337567	0.239506	0.531556	0.404871	0.153887	0.506804
ENSG00000197965	MPZL1	myelin protein zero like 1 [Source:HGNC Symbol;Acc:HGNC:7226]	9019	transmembrane receptor protein tyrosine kinase signaling pathway				0.0564218	0.641691	0.499612	0.0620529	0.591676	0.470786	0.342904	0.00365755	0.0306277	0.300605	0.00499393	0.0184112	0.0205409	0.754281	0.56983	0.0219942	0.729764	0.559519	0.41076	0.00763803	0.605959	0.413824	0.00685293	0.499304	0.463955	0.101278	0.421825	0.433036	0.12692	0.477334
ENSG00000168575	SLC20A2	solute carrier family 20 member 2 [Source:HGNC Symbol;Acc:HGNC:10947]	6575					-0.349594	0.00306985	0.0338957	-0.39456	0.000424377	0.0123562	-0.34205	0.00366618	0.0306554	-0.378326	0.000343066	0.00473649	-0.143074	0.0267486	0.13303	-0.172769	0.00561041	0.0609705	0.181076	0.253138	0.841179	0.132653	0.394552	0.843919	0.536537	0.060578	0.366913	0.469219	0.0977719	0.442057
ENSG00000172824	CES4A	carboxylesterase 4A [Source:HGNC Symbol;Acc:HGNC:26741]	283848					-0.171493	0.164254	0.255113	-0.193518	0.0920821	0.185241	-0.350181	0.0036805	0.030664	-0.337037	0.00154632	0.00994475	-0.0699091	0.295826	0.379407	-0.0857347	0.176104	0.303879	0.150335	0.342585	0.847937	0.135774	0.38348	0.843033	0.483503	0.0909522	0.410885	0.459672	0.104895	0.451873
ENSG00000215845	TSTD1	thiosulfate sulfurtransferase like domain containing 1 [Source:HGNC Symbol;Acc:HGNC:35410]	100131187					-0.172624	0.148671	0.244003	-0.231112	0.0435354	0.126016	-0.33959	0.00368355	0.030664	-0.369018	0.000490129	0.00554736	-0.103806	0.107963	0.247349	-0.128108	0.0419308	0.159234	0.237283	0.132981	0.803334	0.193254	0.213823	0.804938	0.478561	0.0946546	0.4136	0.438829	0.121852	0.471174
ENSG00000120696	KBTBD7	kelch repeat and BTB domain containing 7 [Source:HGNC Symbol;Acc:HGNC:25266]	84078					-0.0609889	0.600226	0.486027	-0.116183	0.314261	0.348294	-0.328907	0.00368618	0.030664	-0.371083	0.000453237	0.00532443	-0.0496033	0.430367	0.449313	-0.0766636	0.226858	0.34004	0.175517	0.272078	0.842326	0.15164	0.330134	0.839558	0.374958	0.195711	0.500147	0.392409	0.167102	0.51386
ENSG00000119541	VPS4B	vacuolar protein sorting 4 homolog B [Source:HGNC Symbol;Acc:HGNC:10895]	9525	endosomal transport; endosome organization; protein transport; membrane organization				0.287787	0.0179118	0.0811281	0.293887	0.00973791	0.0557224	0.34879	0.0036885	0.030664	0.332047	0.00183089	0.0108437	0.131899	0.0459098	0.170234	0.13728	0.028994	0.133652	0.350582	0.0286606	0.709267	0.345185	0.0249921	0.608348	0.41619	0.155805	0.475696	0.402973	0.155849	0.508711
ENSG00000259456	ADNP-AS1	ADNP antisense RNA 1 [Source:HGNC Symbol;Acc:HGNC:51227]	101927631					-0.333221	0.00591801	0.045912	-0.302289	0.00777251	0.0493227	-0.349083	0.00371306	0.0308238	-0.280356	0.00903298	0.0254056	-0.138881	0.035619	0.152882	-0.127899	0.0422749	0.159411	-0.283484	0.0674718	0.770375	-0.32083	0.0375794	0.647868	-0.431826	0.126123	0.447091	-0.478999	0.0908745	0.432934
ENSG00000010327	STAB1	stabilin 1 [Source:HGNC Symbol;Acc:HGNC:18628]	23166	oxidation-reduction process			Hepatic stellate cells | Kupffer cells | Macrophages	-0.0832132	0.496974	0.443813	-0.0267217	0.817435	0.540768	-0.345951	0.0037352	0.0309629	-0.222291	0.0398209	0.0614729	-0.0205738	0.756509	0.570463	0.00551328	0.931017	0.611951	-0.189023	0.228553	0.832847	-0.193555	0.213104	0.804938	0.0173439	0.951683	0.772435	0.0283375	0.920937	0.799704
ENSG00000065809	FAM107B	family with sequence similarity 107 member B [Source:HGNC Symbol;Acc:HGNC:23726]	83641					0.217772	0.0794432	0.177011	0.195479	0.0887828	0.18211	0.353197	0.00374089	0.0309655	0.288994	0.00705018	0.0222196	0.06089	0.36783	0.419127	0.0568611	0.370936	0.419612	0.150329	0.348212	0.849986	0.152526	0.327299	0.839558	0.375069	0.196414	0.50069	0.408447	0.150244	0.502492
ENSG00000112414	ADGRG6	adhesion G protein-coupled receptor G6 [Source:HGNC Symbol;Acc:HGNC:13841]	57211				Hepatocytes | Endothelial cells	-0.0407907	0.743441	0.5346	-0.0695104	0.547843	0.45389	-0.351379	0.0037568	0.0310477	-0.317661	0.00293522	0.0140091	-0.033421	0.620018	0.525319	-0.0444912	0.48425	0.471575	0.187471	0.239445	0.835771	0.193425	0.213415	0.804938	0.563762	0.0497706	0.349608	0.561242	0.0469239	0.369628
ENSG00000162482	AKR7A3	aldo-keto reductase family 7 member A3 [Source:HGNC Symbol;Acc:HGNC:390]	22977	small molecule metabolic process; oxidation-reduction process; xenobiotic metabolic process		*		-0.162719	0.181768	0.2698	-0.186079	0.10549	0.199075	-0.345168	0.00376159	0.0310477	-0.332507	0.00180277	0.0107701	-0.102673	0.118725	0.258722	-0.110877	0.0791638	0.213592	-0.170426	0.280272	0.843627	-0.154885	0.319835	0.83707	-0.329003	0.250806	0.53746	-0.278157	0.328681	0.608504
ENSG00000139323	POC1B	POC1 centriolar protein B [Source:HGNC Symbol;Acc:HGNC:30836]	282809					0.0750778	0.534219	0.458723	0.147239	0.201435	0.278671	0.340669	0.00377278	0.0310955	0.36929	0.000485107	0.00552043	0.0547787	0.401491	0.436441	0.0851547	0.179076	0.305953	0.359198	0.0184888	0.675133	0.373767	0.0149737	0.574659	0.517216	0.0633199	0.372498	0.505327	0.0742074	0.413979
ENSG00000070831	CDC42	cell division cycle 42 [Source:HGNC Symbol;Acc:HGNC:1736]	998	blood coagulation; Fc-gamma receptor signaling pathway involved in phagocytosis; actin cytoskeleton organization; axon guidance; ephrin receptor signaling pathway; canonical Wnt signaling pathway; small GTPase mediated signal transduction; regulation of small GTPase mediated signal transduction; actin filament bundle assembly; protein ubiquitination; vascular endothelial growth factor receptor si…				0.229633	0.0559279	0.149003	0.274373	0.0160584	0.0736288	0.341813	0.00379049	0.0311753	0.374589	0.000396392	0.00500325	0.123616	0.0572102	0.187197	0.146548	0.0195268	0.110482	0.148848	0.352986	0.850281	0.127461	0.413391	0.848016	0.455481	0.115844	0.434696	0.451329	0.111447	0.461714
ENSG00000105122	RASAL3	RAS protein activator like 3 [Source:HGNC Symbol;Acc:HGNC:26129]	64926	axon guidance; positive regulation of GTPase activity; small GTPase mediated signal transduction; vascular endothelial growth factor receptor signaling pathway; innate immune response			NK-cells | T-cells | dendritic cells | B-cells | granulocytes	-0.0185409	0.879252	0.57961	0.0661543	0.567373	0.461624	0.343648	0.00379577	0.0311753	0.382471	0.000291701	0.00435418	-0.00389047	0.953022	0.626412	0.035255	0.579581	0.508814	0.340448	0.0269442	0.688708	0.313428	0.042323	0.673379	0.316253	0.262658	0.544184	0.299188	0.293232	0.588362
ENSG00000112599	GUCA1B	guanylate cyclase activator 1B [Source:HGNC Symbol;Acc:HGNC:4679]	2979					-0.148169	0.231377	0.304604	-0.166661	0.147671	0.238365	-0.349973	0.00379869	0.0311753	-0.32922	0.00201237	0.0114892	-0.0566554	0.398635	0.434664	-0.0676719	0.286511	0.377651	0.122465	0.443503	0.861533	0.0759354	0.626458	0.881936	0.50583	0.0791726	0.396016	0.482917	0.0882213	0.430431
ENSG00000168653	NDUFS5	NADH:ubiquinone oxidoreductase subunit S5 [Source:HGNC Symbol;Acc:HGNC:7712]	4725	small molecule metabolic process; respiratory electron transport chain; cellular metabolic process; mitochondrial electron transport, NADH to ubiquinone				-0.108746	0.380677	0.390647	-0.0793936	0.492301	0.431026	-0.34975	0.00382506	0.0313359	-0.252121	0.0193174	0.0399679	-0.055668	0.406977	0.43884	-0.0399037	0.530532	0.49022	0.236933	0.139953	0.804748	0.212913	0.17043	0.785315	0.258898	0.376337	0.598883	0.255188	0.370389	0.627817
ENSG00000167216	KATNAL2	katanin catalytic subunit A1 like 2 [Source:HGNC Symbol;Acc:HGNC:25387]	83473					-0.224256	0.065469	0.161273	-0.204686	0.0745226	0.166585	-0.345788	0.00382965	0.0313359	-0.291604	0.00653192	0.0212092	-0.0711881	0.282888	0.371489	-0.0699219	0.27069	0.368263	0.177366	0.265515	0.841179	0.124196	0.425498	0.850091	0.145434	0.616099	0.690843	0.0939818	0.741956	0.759859
ENSG00000070718	AP3M2	adaptor related protein complex 3 subunit mu 2 [Source:HGNC Symbol;Acc:HGNC:570]	10947	intracellular protein transport				0.103609	0.393446	0.396742	0.0994378	0.389435	0.385999	0.342148	0.00383892	0.0313359	0.276173	0.0101583	0.0270771	0.0415238	0.5277	0.489739	0.0368551	0.562464	0.50187	0.309513	0.0530769	0.76927	0.295288	0.0560855	0.682706	1.04117	0.00022974	0.11118	1.02537	0.000192491	0.114951
ENSG00000227507	LTB	lymphotoxin beta [Source:HGNC Symbol;Acc:HGNC:6711]	4050	signal transduction			B-cells | T-cells	0.0202655	0.867131	0.576106	0.112317	0.330722	0.356626	0.340646	0.00384227	0.0313359	0.393485	0.000187625	0.00352637	-0.0153514	0.81479	0.586848	0.0301509	0.635725	0.528778	0.399424	0.0113199	0.63842	0.378065	0.0138189	0.563079	0.477076	0.0992335	0.419926	0.491	0.0829427	0.421773
ENSG00000136068	FLNB	filamin B [Source:HGNC Symbol;Acc:HGNC:3755]	2317	actin cytoskeleton organization; signal transduction	actin cytoskeleton organization			0.412279	0.000380707	0.0124931	0.429462	0.000112566	0.00684246	0.338074	0.00384896	0.0313359	0.34812	0.00105216	0.00807747	0.220455	0.000450846	0.0242923	0.227639	0.000207741	0.0150496	-0.234135	0.144183	0.808638	-0.26077	0.0923144	0.718749	-0.15122	0.605374	0.687806	-0.182849	0.521433	0.689743
ENSG00000090316	MAEA	macrophage erythroblast attacher, E3 ubiquitin ligase [Source:HGNC Symbol;Acc:HGNC:13731]	10296	cell adhesion; cytoskeleton organization; cell cycle				0.246867	0.0447004	0.131948	0.225088	0.0494403	0.135737	0.349718	0.0038509	0.0313359	0.292372	0.00638603	0.0209279	0.115467	0.08358	0.222495	0.107822	0.0879359	0.224593	0.341462	0.0236318	0.684653	0.376713	0.0141736	0.563079	0.237174	0.392592	0.606831	0.315086	0.268174	0.576881
ENSG00000167863	ATP5PD	ATP synthase peripheral stalk subunit d [Source:HGNC Symbol;Acc:HGNC:845]	10476					-0.0378762	0.756167	0.539006	-0.0776138	0.502079	0.436374	-0.342895	0.00386423	0.0314	-0.341246	0.00133808	0.00922466	-0.0306947	0.641754	0.533847	-0.0479286	0.451037	0.457054	0.38051	0.0162182	0.6657	0.328928	0.0329071	0.638058	0.486016	0.0935765	0.4136	0.426033	0.133261	0.485263
ENSG00000170633	RNF34	ring finger protein 34 [Source:HGNC Symbol;Acc:HGNC:17297]	80196	protein ubiquitination; protein ubiquitination involved in ubiquitin-dependent protein catabolic process; proteasome-mediated ubiquitin-dependent protein catabolic process				0.153727	0.196594	0.279637	0.220758	0.0540805	0.141823	0.336035	0.00387819	0.0314691	0.369181	0.00048711	0.00552533	0.0909953	0.157348	0.291493	0.118012	0.0613954	0.190218	0.328243	0.0401277	0.743933	0.299405	0.0526777	0.682706	0.796379	0.005618	0.213845	0.75232	0.00720614	0.243153
ENSG00000175600	SUGCT	succinyl-CoA:glutarate-CoA transferase [Source:HGNC Symbol;Acc:HGNC:16001]	79783					-0.213525	0.0774078	0.174963	-0.251934	0.0274472	0.0979896	-0.342608	0.00389003	0.0314985	-0.358103	0.000735051	0.00662932	-0.128521	0.0489845	0.175459	-0.145214	0.0206992	0.113143	0.271556	0.087803	0.777723	0.253122	0.102425	0.732224	0.288414	0.320697	0.57391	0.280875	0.323952	0.606578
ENSG00000187546	AGMO	alkylglycerol monooxygenase [Source:HGNC Symbol;Acc:HGNC:33784]	392636	oxidation-reduction process; fatty acid biosynthetic process		*	Hepatocytes	-0.289107	0.0156674	0.0762172	-0.317971	0.00501856	0.039031	-0.341587	0.00389276	0.0314985	-0.346707	0.00110594	0.00836316	-0.144143	0.0263425	0.132595	-0.156738	0.0123074	0.0866915	0.301869	0.0600084	0.770375	0.311183	0.0438564	0.675607	0.33788	0.249303	0.536724	0.360306	0.204975	0.53771
ENSG00000124508	BTN2A2	butyrophilin subfamily 2 member A2 [Source:HGNC Symbol;Acc:HGNC:1137]	10385				Plasma cells | B-cells	0.09605	0.431275	0.414661	0.146319	0.204294	0.279667	0.343225	0.00390441	0.0315485	0.353537	0.000867316	0.00727812	0.0385689	0.559478	0.501975	0.066015	0.298547	0.384382	-0.260586	0.0916606	0.77938	-0.267013	0.0846586	0.706687	-0.368143	0.19085	0.496606	-0.424437	0.134739	0.486518
ENSG00000124523	SIRT5	sirtuin 5 [Source:HGNC Symbol;Acc:HGNC:14933]	23408					-0.293399	0.0145506	0.0730933	-0.336827	0.0028795	0.0293438	-0.342762	0.00391687	0.0316048	-0.373137	0.000419088	0.00515084	-0.138057	0.0343484	0.150142	-0.161259	0.00993599	0.0798042	0.291251	0.0666964	0.770375	0.271404	0.0795843	0.700197	0.30022	0.301049	0.565377	0.262833	0.356162	0.62215
ENSG00000140943	MBTPS1	membrane bound transcription factor peptidase, site 1 [Source:HGNC Symbol;Acc:HGNC:15456]	8720					0.250054	0.0383925	0.121514	0.241133	0.0350158	0.111356	0.342941	0.00393099	0.0316744	0.29956	0.00515416	0.0187847	0.0920519	0.161655	0.294162	0.0892099	0.159051	0.289951	0.166376	0.297009	0.845772	0.194171	0.21164	0.804938	0.45743	0.112859	0.434318	0.491774	0.082451	0.421773
ENSG00000170322	NFRKB	nuclear factor related to kappaB binding protein [Source:HGNC Symbol;Acc:HGNC:7802]	4798					0.210919	0.0836268	0.180678	0.150912	0.190319	0.271903	0.344866	0.00394031	0.0317052	0.23556	0.0291495	0.0505091	0.0950475	0.150694	0.286101	0.068806	0.278461	0.373774	0.119691	0.43784	0.860884	0.0993433	0.524094	0.867256	0.481322	0.0836365	0.402629	0.478627	0.0911291	0.433411
ENSG00000080910	CFHR2	complement factor H related 2 [Source:HGNC Symbol;Acc:HGNC:4890]	3080			*	Hepatocytes	-0.222211	0.065553	0.161273	-0.243262	0.0333992	0.109223	-0.341401	0.00397663	0.0319512	-0.324945	0.0023177	0.0123786	-0.103453	0.113996	0.253507	-0.111367	0.0778245	0.211889	-0.345982	0.022774	0.684653	-0.354935	0.0210722	0.584041	-0.511571	0.0650417	0.375475	-0.5117	0.0705668	0.406912
ENSG00000110218	PANX1	pannexin 1 [Source:HGNC Symbol;Acc:HGNC:8599]	24145	calcium ion transmembrane transport; synaptic transmission; innate immune response				-0.0492791	0.688499	0.516077	-0.0191934	0.868316	0.555723	0.344539	0.00398197	0.0319512	0.322188	0.00253616	0.0129698	-0.0464037	0.484954	0.472558	-0.0307063	0.629507	0.527094	0.186205	0.24622	0.840985	0.1512	0.331545	0.839558	0.266778	0.360926	0.592247	0.232256	0.415104	0.647234
ENSG00000168803	ADAL	adenosine deaminase like [Source:HGNC Symbol;Acc:HGNC:31853]	161823	small molecule metabolic process; drug metabolic process				-0.229345	0.0640289	0.159955	-0.206362	0.0721365	0.164487	-0.350217	0.00399668	0.0319759	-0.291028	0.00664329	0.021396	-0.150741	0.0237921	0.125758	-0.140685	0.0251414	0.125525	-0.155792	0.308717	0.845772	-0.239718	0.122213	0.760236	-0.480611	0.0819977	0.401186	-0.587997	0.037166	0.345898
ENSG00000005243	COPZ2	COPI coat complex subunit zeta 2 [Source:HGNC Symbol;Acc:HGNC:19356]	51226				Fibroblasts	-0.0470567	0.697277	0.518629	-0.0680511	0.556295	0.457067	-0.338851	0.0040046	0.0319759	-0.307587	0.00403221	0.016441	-0.0533132	0.414648	0.442389	-0.0579556	0.361758	0.415276	0.161456	0.319174	0.845772	0.142667	0.359695	0.843033	0.737044	0.0109711	0.237457	0.702116	0.0123731	0.269186
ENSG00000167378	IRGQ	immunity related GTPase Q [Source:HGNC Symbol;Acc:HGNC:24868]	126298					0.0978363	0.422737	0.411127	0.119884	0.299008	0.339784	0.342324	0.00400514	0.0319759	0.324683	0.00233769	0.0124237	0.0354	0.592256	0.514787	0.045909	0.470395	0.464876	0.430272	0.00680133	0.605959	0.421355	0.00586563	0.487795	0.577751	0.0474554	0.344811	0.559735	0.0475314	0.370942
ENSG00000185875	THNSL1	threonine synthase like 1 [Source:HGNC Symbol;Acc:HGNC:26160]	79896					-0.256475	0.0338045	0.113622	-0.285871	0.0120062	0.0624303	-0.342694	0.00400725	0.0319759	-0.349446	0.00100387	0.00796648	-0.133052	0.0420722	0.163525	-0.147796	0.0184819	0.108387	0.238315	0.130368	0.802232	0.196912	0.205206	0.804834	0.845866	0.00257671	0.1617	0.820705	0.00325243	0.192625
ENSG00000061273	HDAC7	histone deacetylase 7 [Source:HGNC Symbol;Acc:HGNC:14067]	51564	Notch signaling pathway				0.00737364	0.95202	0.599728	0.0493255	0.669915	0.496815	0.342952	0.00402426	0.0320142	0.343445	0.00123975	0.00888136	0.0144574	0.827375	0.590202	0.034043	0.592705	0.513966	-0.290902	0.0663769	0.770375	-0.244659	0.114602	0.749831	-0.219243	0.449686	0.634008	-0.178618	0.531137	0.692933
ENSG00000184432	COPB2	COPI coat complex subunit beta 2 [Source:HGNC Symbol;Acc:HGNC:2232]	9276	intracellular protein transport; membrane organization				0.0356342	0.767751	0.543853	0.0740399	0.522015	0.443956	0.33774	0.00402681	0.0320142	0.337738	0.0015097	0.0097983	-0.00390472	0.952319	0.62628	0.0155701	0.806841	0.581203	0.214817	0.178593	0.816199	0.176181	0.257432	0.822634	0.565982	0.0496338	0.349594	0.519618	0.0662466	0.40129
ENSG00000170860	LSM3	LSM3 homolog, U6 small nuclear RNA and mRNA degradation associated [Source:HGNC Symbol;Acc:HGNC:17874]	27258					-0.0918386	0.457299	0.427619	-0.0772065	0.504331	0.437468	-0.346274	0.00402873	0.0320142	-0.286723	0.00753026	0.0231241	-0.0647429	0.332277	0.400613	-0.0603554	0.342128	0.405271	0.199294	0.197086	0.824621	0.189379	0.223228	0.812385	0.175215	0.533763	0.662748	0.161201	0.572011	0.706206
ENSG00000110723	EXPH5	exophilin 5 [Source:HGNC Symbol;Acc:HGNC:30578]	23086					-0.217884	0.0706711	0.168255	-0.269848	0.0179509	0.0781229	-0.340357	0.00403856	0.0320482	-0.378673	0.000338476	0.00471757	-0.0919372	0.160174	0.293313	-0.121352	0.0542725	0.179034	-0.198067	0.220697	0.832632	-0.186648	0.230029	0.812385	-0.440739	0.132567	0.452808	-0.438414	0.122209	0.471412
ENSG00000167740	CYB5D2	cytochrome b5 domain containing 2 [Source:HGNC Symbol;Acc:HGNC:28471]	124936					-0.301914	0.0115702	0.0659529	-0.34838	0.00201534	0.025129	-0.340438	0.00405814	0.032139	-0.38083	0.000311131	0.00450071	-0.134986	0.0380531	0.156817	-0.162347	0.00942883	0.078108	-0.295588	0.0657648	0.770375	-0.303609	0.0493753	0.682706	-0.403411	0.168473	0.484565	-0.41701	0.141782	0.49436
ENSG00000128694	OSGEPL1	O-sialoglycoprotein endopeptidase like 1 [Source:HGNC Symbol;Acc:HGNC:23075]	64172					-0.190358	0.106966	0.206465	-0.234917	0.0401177	0.12022	-0.332578	0.00406526	0.032139	-0.367862	0.000511954	0.00569426	-0.0897916	0.160674	0.293398	-0.11645	0.0649784	0.193841	-0.158469	0.314195	0.845772	-0.112378	0.470996	0.856902	0.0229565	0.936186	0.770507	0.0539006	0.850248	0.785693
ENSG00000258498	DIO3OS	DIO3 opposite strand upstream RNA [Source:HGNC Symbol;Acc:HGNC:20348]	64150					-0.296594	0.0124831	0.0682865	-0.301395	0.0079636	0.0497158	-0.337812	0.00406813	0.032139	-0.340366	0.0013794	0.00933725	-0.149582	0.0201766	0.117931	-0.160193	0.0104556	0.0814115	0.224077	0.148597	0.814915	0.21577	0.164708	0.785315	0.75371	0.00660284	0.220126	0.781819	0.00515679	0.222806
ENSG00000129596	CDO1	cysteine dioxygenase type 1 [Source:HGNC Symbol;Acc:HGNC:1795]	1036	small molecule metabolic process; oxidation-reduction process; cellular nitrogen compound metabolic process; response to glucocorticoid; sulfur amino acid metabolic process; response to ethanol; response to cAMP		*	Hepatocytes	-0.303271	0.00984009	0.0595877	-0.356214	0.00157074	0.0219084	-0.334644	0.00407233	0.032139	-0.36878	0.00049456	0.00558524	-0.14669	0.0215218	0.120926	-0.170272	0.00637215	0.0646727	0.323226	0.0433398	0.754722	0.311156	0.0438755	0.675607	0.604532	0.0372905	0.31985	0.574809	0.0417394	0.357039
ENSG00000069535	MAOB	monoamine oxidase B [Source:HGNC Symbol;Acc:HGNC:6834]	4129	small molecule metabolic process; oxidation-reduction process; xenobiotic metabolic process; response to ethanol; response to drug; response to toxic substance			Hepatocytes | granulocytes	-0.234166	0.0506109	0.14095	-0.282273	0.0131659	0.0653132	-0.338388	0.00408383	0.0321539	-0.364668	0.00057701	0.00597061	-0.116828	0.0719415	0.206884	-0.138735	0.0272906	0.129851	-0.149622	0.351983	0.850281	-0.1061	0.4962	0.860696	-0.239044	0.413092	0.617837	-0.189589	0.50616	0.683572
ENSG00000178996	SNX18	sorting nexin 18 [Source:HGNC Symbol;Acc:HGNC:19245]	112574	endocytosis; endosomal transport; positive regulation of GTPase activity; intracellular protein transport				0.10363	0.405624	0.403026	0.109524	0.342951	0.363355	0.348785	0.00409449	0.0321539	0.309824	0.00376108	0.015787	0.056466	0.402306	0.436942	0.061482	0.333149	0.401641	0.264467	0.0952756	0.781258	0.239227	0.122991	0.761492	0.619624	0.0304561	0.299139	0.534266	0.0588195	0.386025
ENSG00000134882	UBAC2	UBA domain containing 2 [Source:HGNC Symbol;Acc:HGNC:20486]	337867					0.415583	0.000477209	0.0139438	0.401381	0.000330896	0.0108443	0.343962	0.00409767	0.0321539	0.316707	0.0030262	0.0142492	0.24076	0.000169515	0.0202023	0.235055	0.000122854	0.0119302	0.351223	0.0240363	0.684653	0.310867	0.0440761	0.675607	0.692503	0.0140172	0.251853	0.644544	0.0220251	0.305717
ENSG00000138592	USP8	ubiquitin specific peptidase 8 [Source:HGNC Symbol;Acc:HGNC:12631]	9101	endosome organization; proteasome-mediated ubiquitin-dependent protein catabolic process				0.321807	0.00742979	0.0521028	0.358046	0.00148051	0.0214412	0.342669	0.00409972	0.0321539	0.363001	0.000613872	0.00615039	0.131642	0.0448563	0.168974	0.155611	0.0129704	0.0893216	0.217759	0.172532	0.816199	0.233901	0.131664	0.770693	0.399479	0.168108	0.484565	0.415886	0.142872	0.495145
ENSG00000184990	SIVA1	SIVA1 apoptosis inducing factor [Source:HGNC Symbol;Acc:HGNC:17712]	10572					-0.257109	0.0308139	0.108977	-0.312666	0.00583334	0.0421548	-0.336968	0.00410212	0.0321539	-0.373296	0.000416548	0.00515084	-0.113363	0.0798056	0.217594	-0.139948	0.0259361	0.127511	0.149546	0.336174	0.846995	0.0667679	0.668728	0.888642	0.445313	0.113118	0.43436	0.377456	0.184044	0.52266
ENSG00000145945	FAM50B	family with sequence similarity 50 member B [Source:HGNC Symbol;Acc:HGNC:18789]	26240					-0.208859	0.083703	0.180678	-0.258761	0.023418	0.0903757	-0.340033	0.0041152	0.0321828	-0.376765	0.00036448	0.0048376	-0.0894792	0.172215	0.301454	-0.118786	0.0596805	0.187738	0.330521	0.0353789	0.727113	0.341952	0.0264222	0.611579	0.707439	0.0126795	0.246801	0.655189	0.019865	0.302525
ENSG00000155666	KDM8	lysine demethylase 8 [Source:HGNC Symbol;Acc:HGNC:25840]	79831	oxidation-reduction process		*	Hepatocytes	-0.236674	0.0374692	0.119872	-0.321238	0.00456876	0.0372676	-0.321482	0.00412097	0.0321828	-0.398571	0.000152257	0.00324003	-0.113889	0.0649511	0.198722	-0.154288	0.0137879	0.0922853	0.448866	0.00284661	0.579102	0.45476	0.00284345	0.457325	0.363244	0.192591	0.497987	0.466409	0.0998279	0.44252
ENSG00000147548	NSD3	nuclear receptor binding SET domain protein 3 [Source:HGNC Symbol;Acc:HGNC:12767]	54904					0.0697089	0.571473	0.474227	0.11309	0.327388	0.354812	0.344142	0.00412679	0.0321828	0.343055	0.00125669	0.00892387	0.0495704	0.456741	0.460964	0.0683687	0.281547	0.375123	0.184273	0.245708	0.840985	0.134234	0.38892	0.843033	0.0201086	0.944595	0.771535	-0.00792374	0.977859	0.806846
ENSG00000198650	TAT	tyrosine aminotransferase [Source:HGNC Symbol;Acc:HGNC:11573]	6898	small molecule metabolic process; cellular nitrogen compound metabolic process; L-phenylalanine catabolic process; response to glucocorticoid; response to oxidative stress		*	Hepatocytes	-0.256544	0.0327366	0.112213	-0.273544	0.0163916	0.0744191	-0.339707	0.00412815	0.0321828	-0.319389	0.00277671	0.0135155	-0.11899	0.0681417	0.202739	-0.125151	0.0470094	0.168196	-0.249886	0.112142	0.797116	-0.222958	0.150941	0.783436	0.0180213	0.95005	0.772305	0.0497206	0.861741	0.788452
ENSG00000143702	CEP170	centrosomal protein 170 [Source:HGNC Symbol;Acc:HGNC:28920]	9859					0.142452	0.234253	0.306612	0.212726	0.0636319	0.154346	0.335413	0.00415104	0.0322133	0.388242	0.00023192	0.00392602	0.0680276	0.294224	0.379037	0.102505	0.105021	0.242399	-0.298701	0.0572302	0.770375	-0.283444	0.0669084	0.6834	-0.571708	0.0447821	0.342565	-0.606239	0.0315375	0.333336
ENSG00000063241	ISOC2	isochorismatase domain containing 2 [Source:HGNC Symbol;Acc:HGNC:26278]	79763					-0.279265	0.0189747	0.0837575	-0.325646	0.00401875	0.0347821	-0.337269	0.00415259	0.0322133	-0.376049	0.00037472	0.00491023	-0.13519	0.036409	0.154153	-0.159181	0.0109709	0.0826818	-0.222255	0.161642	0.814915	-0.172797	0.266749	0.824143	-0.316395	0.273574	0.548733	-0.249522	0.381154	0.633454
ENSG00000166797	CIAO2A	cytosolic iron-sulfur assembly component 2A [Source:HGNC Symbol;Acc:HGNC:26235]	84191					-0.200092	0.0983836	0.198201	-0.209347	0.0680393	0.159732	-0.340317	0.00415431	0.0322133	-0.307341	0.00406304	0.0164624	-0.0778922	0.236169	0.342014	-0.0811178	0.200784	0.321704	-0.287448	0.0717491	0.770375	-0.285555	0.0648647	0.6834	-0.443351	0.127117	0.448168	-0.450617	0.11202	0.461947
ENSG00000128311	TST	thiosulfate sulfurtransferase [Source:HGNC Symbol;Acc:HGNC:12388]	7263	small molecule metabolic process; cellular nitrogen compound metabolic process; sulfur amino acid metabolic process		*	Hepatocytes	-0.22083	0.0622837	0.157917	-0.271882	0.0170779	0.0762027	-0.333639	0.00415879	0.0322133	-0.361721	0.000643644	0.00632705	-0.118965	0.0634494	0.196455	-0.140267	0.0255897	0.126986	-0.245292	0.115478	0.797116	-0.23878	0.123701	0.763274	-0.469391	0.0968897	0.416489	-0.511762	0.0705323	0.406912
ENSG00000100731	PCNX1	pecanex 1 [Source:HGNC Symbol;Acc:HGNC:19740]	22990				dendritic cells	0.333289	0.00587542	0.045912	0.319481	0.00480601	0.0382801	0.344742	0.00416253	0.0322133	0.313569	0.00334352	0.0150037	0.122706	0.0639551	0.197199	0.123277	0.0504845	0.173419	0.0921047	0.568104	0.876867	0.0822555	0.597995	0.87903	0.744237	0.00969253	0.233757	0.695	0.0133201	0.274117
ENSG00000178803	ADORA2A-AS1	ADORA2A antisense RNA 1 [Source:HGNC Symbol;Acc:HGNC:37122]	646023			*		-0.199621	0.0994325	0.199531	-0.241534	0.0347069	0.111181	-0.340407	0.0041717	0.0322133	-0.360347	0.000677052	0.00644484	-0.118447	0.0703361	0.205125	-0.138107	0.028015	0.131603	0.120534	0.445195	0.862164	0.16226	0.297207	0.831819	0.215543	0.452159	0.634476	0.271588	0.340291	0.614713
ENSG00000235142	LINC02532	long intergenic non-protein coding RNA 2532 [Source:HGNC Symbol;Acc:HGNC:53549]	100422737			*		-0.105245	0.385436	0.392893	-0.180147	0.117234	0.2109	-0.338783	0.00417333	0.0322133	-0.37586	0.000377462	0.00491208	-0.0737173	0.260496	0.358472	-0.10602	0.0934592	0.230466	0.255659	0.104544	0.797116	0.247846	0.109892	0.742782	0.340996	0.234765	0.528139	0.336535	0.236725	0.555051
ENSG00000117480	FAAH	fatty acid amide hydrolase [Source:HGNC Symbol;Acc:HGNC:3553]	2166					-0.109084	0.36722	0.383158	-0.17946	0.118657	0.212193	-0.338018	0.00417679	0.0322133	-0.378637	0.000338947	0.00471757	-0.0740303	0.257422	0.356826	-0.105659	0.0945968	0.23183	0.311026	0.048241	0.765634	0.283952	0.066412	0.6834	0.6803	0.0167743	0.263378	0.654016	0.0200938	0.302525
ENSG00000146216	TTBK1	tau tubulin kinase 1 [Source:HGNC Symbol;Acc:HGNC:19140]	84630					-0.247251	0.0402986	0.124695	-0.233731	0.0411581	0.121558	-0.340093	0.00418348	0.0322218	-0.300819	0.00496162	0.0184112	-0.118617	0.0697475	0.205022	-0.115259	0.0678208	0.198317	0.311317	0.0477979	0.765133	0.298987	0.053016	0.682706	0.818625	0.0036976	0.176159	0.861582	0.00195397	0.159149
ENSG00000180875	GREM2	gremlin 2, DAN family BMP antagonist [Source:HGNC Symbol;Acc:HGNC:17655]	64388					-0.0600318	0.618287	0.491839	-0.150526	0.191467	0.272604	-0.335955	0.00419164	0.0322415	-0.396477	0.000165993	0.00337132	-0.0336057	0.606162	0.519813	-0.0763468	0.228799	0.34127	-0.224512	0.149318	0.814915	-0.232176	0.134572	0.770693	-0.256386	0.366214	0.595006	-0.248295	0.383509	0.634704
ENSG00000100652	SLC10A1	solute carrier family 10 member 1 [Source:HGNC Symbol;Acc:HGNC:10905]	6554	small molecule metabolic process; bile acid and bile salt transport; bile acid metabolic process		*	Hepatocytes	-0.315819	0.00933814	0.0578145	-0.325632	0.0040205	0.0347821	-0.344794	0.00422877	0.0324837	-0.326893	0.0021737	0.012003	-0.16513	0.0121176	0.0948366	-0.170095	0.00642923	0.0649896	-0.246049	0.113924	0.797116	-0.259235	0.0942776	0.719375	-0.277949	0.327513	0.577282	-0.304867	0.284109	0.584426
ENSG00000120868	APAF1	apoptotic peptidase activating factor 1 [Source:HGNC Symbol;Acc:HGNC:576]	317	positive regulation of apoptotic process; intrinsic apoptotic signaling pathway in response to endoplasmic reticulum stress			monocytes	0.219637	0.0742396	0.172307	0.209516	0.0678142	0.159459	0.345539	0.00424191	0.0325154	0.307386	0.00405742	0.0164622	0.0572112	0.393432	0.432549	0.0619601	0.329384	0.399263	-0.0749295	0.639018	0.885285	-0.0371412	0.811925	0.90546	-0.430569	0.135447	0.456073	-0.3902	0.16953	0.516693
ENSG00000162460	TMEM82	transmembrane protein 82 [Source:HGNC Symbol;Acc:HGNC:32350]	388595			*	Hepatocytes	-0.204476	0.0856577	0.183029	-0.278598	0.0144498	0.0693431	-0.333834	0.00424856	0.0325154	-0.395108	0.000175589	0.00343599	-0.129559	0.0434661	0.166184	-0.163232	0.00903338	0.0765702	-0.421347	0.0069892	0.605959	-0.431681	0.00471753	0.457325	-0.54697	0.056307	0.362048	-0.591707	0.0359576	0.341859
ENSG00000081760	AACS	acetoacetyl-CoA synthetase [Source:HGNC Symbol;Acc:HGNC:21298]	65985	response to drug				0.155667	0.205965	0.286301	0.189114	0.0998454	0.193698	0.344043	0.00424983	0.0325154	0.345042	0.00117249	0.00864617	0.0637692	0.33923	0.404503	0.0831749	0.189498	0.313958	0.233043	0.140787	0.804748	0.258224	0.0955879	0.721239	0.861614	0.00220872	0.15207	0.867893	0.00180192	0.149713
ENSG00000123472	ATPAF1	ATP synthase mitochondrial F1 complex assembly factor 1 [Source:HGNC Symbol;Acc:HGNC:18803]	64756					-0.132403	0.278549	0.333123	-0.179016	0.119584	0.212588	-0.340877	0.00427995	0.0326981	-0.352624	0.000896205	0.00743196	-0.0688322	0.297934	0.380537	-0.089756	0.156487	0.288001	0.198289	0.215211	0.828895	0.152585	0.327113	0.839558	0.657875	0.0221114	0.277125	0.617678	0.0283888	0.325271
ENSG00000148803	FUOM	fucose mutarotase [Source:HGNC Symbol;Acc:HGNC:24733]	282969			*	Hepatocytes	-0.135262	0.263572	0.324537	-0.181227	0.115023	0.209	-0.337554	0.00428506	0.0326981	-0.349001	0.00101985	0.00798587	-0.0882277	0.177023	0.303751	-0.106127	0.0931249	0.230143	-0.276009	0.0784738	0.770375	-0.244153	0.115365	0.751278	-0.112603	0.69503	0.714502	-0.140378	0.622724	0.723774
ENSG00000133800	LYVE1	lymphatic vessel endothelial hyaluronan receptor 1 [Source:HGNC Symbol;Acc:HGNC:14687]	10894	small molecule metabolic process			Kupffer cells | Hepatic stellate cells | Endothelial cells	-0.115637	0.345828	0.371391	-0.101361	0.380294	0.382186	-0.341826	0.00429155	0.0327043	-0.270457	0.0118936	0.0301757	-0.00963198	0.884894	0.607823	-0.00406725	0.949082	0.615079	-0.203796	0.188257	0.822077	-0.206924	0.182898	0.798251	-0.454634	0.105101	0.425477	-0.499424	0.0777123	0.417855
ENSG00000196505	GDAP2	ganglioside induced differentiation associated protein 2 [Source:HGNC Symbol;Acc:HGNC:18010]	54834					0.311418	0.0101059	0.0605343	0.22477	0.0497696	0.136372	0.342694	0.00431807	0.032863	0.203958	0.0597559	0.0782453	0.163377	0.0127332	0.0968872	0.123212	0.0506085	0.173419	0.274706	0.0803413	0.770751	0.287262	0.063249	0.682706	0.704785	0.0126669	0.246801	0.708387	0.0115878	0.259295
ENSG00000124766	SOX4	SRY-box transcription factor 4 [Source:HGNC Symbol;Acc:HGNC:11200]	6659	negative regulation of cell proliferation; canonical Wnt signaling pathway; T cell differentiation; positive regulation of apoptotic process; positive regulation of cell proliferation				-0.0658447	0.588343	0.481884	-0.00494522	0.965929	0.580618	0.338034	0.00434004	0.0329709	0.352103	0.000913093	0.00752355	-0.083483	0.20298	0.32121	-0.0519151	0.414159	0.440633	0.239266	0.130981	0.803334	0.216313	0.163635	0.785315	0.60164	0.0353626	0.315425	0.559003	0.0478291	0.370942
ENSG00000085871	MGST2	microsomal glutathione S-transferase 2 [Source:HGNC Symbol;Acc:HGNC:7063]	4258	small molecule metabolic process; oxidation-reduction process; xenobiotic metabolic process				-0.147816	0.222809	0.298584	-0.200241	0.0811585	0.173686	-0.338028	0.00434369	0.0329709	-0.348911	0.00102311	0.00798587	-0.0716201	0.27537	0.366402	-0.0944269	0.135802	0.270769	0.176912	0.26557	0.841179	0.181294	0.243779	0.818516	0.178115	0.538039	0.664449	0.203808	0.474717	0.671345
ENSG00000233006	MIR3936HG	MIR3936 host gene [Source:HGNC Symbol;Acc:HGNC:40538]	553103					-0.283052	0.0211247	0.0892677	-0.288482	0.0112215	0.0604201	-0.345881	0.00435522	0.0329947	-0.323275	0.00244791	0.0127464	-0.172844	0.00896372	0.0854157	-0.176099	0.00472116	0.0563943	0.163599	0.312647	0.845772	0.17087	0.272155	0.826228	0.644873	0.0266753	0.292922	0.646037	0.0217107	0.305717
ENSG00000181284	TMEM102	transmembrane protein 102 [Source:HGNC Symbol;Acc:HGNC:26722]	284114	signal transduction; positive regulation of cell adhesion; response to cytokine	positive regulation of cell adhesion; apoptotic process			0.455813	0.000137492	0.00837539	0.39114	0.000479869	0.0129637	0.345649	0.00435829	0.0329947	0.266269	0.0133239	0.0320182	0.245251	0.000150911	0.0191576	0.218912	0.000375616	0.0201749	-0.196382	0.207069	0.826434	-0.221482	0.153696	0.784872	-0.441018	0.117774	0.436658	-0.425701	0.133567	0.485437
ENSG00000174446	SNAPC5	small nuclear RNA activating complex polypeptide 5 [Source:HGNC Symbol;Acc:HGNC:15484]	10302					-0.16114	0.184947	0.271744	-0.20935	0.0680365	0.159732	-0.338932	0.0043681	0.0330256	-0.356321	0.000784297	0.00688903	-0.100518	0.125788	0.265772	-0.126123	0.0452863	0.165251	-0.233421	0.140448	0.804748	-0.166173	0.285638	0.831819	-0.484622	0.0912658	0.410966	-0.41568	0.143073	0.495302
ENSG00000163584	RPL22L1	ribosomal protein L22 like 1 [Source:HGNC Symbol;Acc:HGNC:27610]	200916					-0.473903	3.24621e-05	0.0049818	-0.36454	0.00119727	0.0196602	-0.331959	0.0043913	0.0330798	-0.209824	0.0526425	0.0727482	-0.236897	0.000138952	0.0189223	-0.190713	0.00212664	0.0395827	-0.287531	0.0718274	0.770375	-0.254501	0.100541	0.729458	-0.661362	0.0218202	0.277125	-0.610461	0.0303426	0.329577
ENSG00000185339	TCN2	transcobalamin 2 [Source:HGNC Symbol;Acc:HGNC:11653]	6948	small molecule metabolic process			Kupffer cells | Hepatic stellate cells	-0.25983	0.0332542	0.113071	-0.252971	0.0267999	0.0971302	-0.342793	0.00439211	0.0330798	-0.315831	0.00311193	0.014512	-0.0906066	0.173281	0.301646	-0.0942108	0.13671	0.271411	0.300695	0.0557068	0.770375	0.340708	0.0269908	0.614765	0.290146	0.312919	0.569523	0.345382	0.224531	0.551067
ENSG00000118260	CREB1	cAMP responsive element binding protein 1 [Source:HGNC Symbol;Acc:HGNC:2345]	1385	signal transduction; protein phosphorylation; axon guidance; Notch signaling pathway; response to drug; synaptic transmission; toll-like receptor 9 signaling pathway; toll-like receptor 2 signaling pathway; toll-like receptor 5 signaling pathway; toll-like receptor 10 signaling pathway; innate immune response; transforming growth factor beta receptor signaling pathway; toll-like receptor TLR1:TLR…				0.0413156	0.729246	0.530463	0.11486	0.319835	0.35096	0.331075	0.00439316	0.0330798	0.3838	0.000276789	0.00422131	0.00919909	0.886767	0.608217	0.0489194	0.441705	0.45277	0.214778	0.178841	0.816199	0.181095	0.244301	0.818825	0.587984	0.0413077	0.332041	0.55375	0.0500087	0.374067
ENSG00000102309	PIN4	peptidylprolyl cis/trans isomerase, NIMA-interacting 4 [Source:HGNC Symbol;Acc:HGNC:8992]	5303					-0.0849016	0.495027	0.443037	-0.114421	0.321699	0.351894	-0.345417	0.00439823	0.0330798	-0.329415	0.00199934	0.0114595	-0.048401	0.472116	0.46724	-0.0629287	0.32184	0.395908	-0.290973	0.0678508	0.770375	-0.244144	0.115378	0.751278	-0.542001	0.0609144	0.367825	-0.479052	0.0908378	0.432934
ENSG00000106992	AK1	adenylate kinase 1 [Source:HGNC Symbol;Acc:HGNC:361]	203	cell cycle arrest	nucleobase-containing small molecule metabolic process; small molecule metabolic process			0.602298	1.66775e-07	0.000349619	0.525849	1.32909e-06	0.000656721	0.344299	0.00440713	0.0331034	0.275705	0.0102915	0.027319	0.273621	1.81169e-05	0.00651698	0.248959	4.33478e-05	0.00828128	0.384372	0.0144431	0.638764	0.385448	0.0120154	0.563079	0.752097	0.00820988	0.226034	0.777149	0.00544201	0.227003
ENSG00000231690	LINC00574	long intergenic non-protein coding RNA 574 [Source:HGNC Symbol;Acc:HGNC:21598]	80069					-0.20144	0.101511	0.201621	-0.192462	0.0938985	0.187272	-0.343156	0.0044578	0.0334131	-0.293904	0.00610358	0.0205977	-0.0858867	0.198213	0.31911	-0.083843	0.185933	0.311615	0.284763	0.0731864	0.770375	0.260818	0.0922532	0.718749	0.553363	0.0548577	0.360635	0.523278	0.064323	0.397508
ENSG00000135617	PRADC1	protease associated domain containing 1 [Source:HGNC Symbol;Acc:HGNC:16047]	84279					-0.190067	0.117064	0.216646	-0.214155	0.0618386	0.15158	-0.338082	0.00445996	0.0334131	-0.332606	0.00179678	0.0107677	-0.0876493	0.182477	0.306576	-0.0988338	0.118255	0.254462	-0.264906	0.0885663	0.77938	-0.307899	0.0461832	0.680192	-0.407873	0.149681	0.470849	-0.433012	0.126942	0.477334
ENSG00000099624	ATP5F1D	ATP synthase F1 subunit delta [Source:HGNC Symbol;Acc:HGNC:837]	513					-0.0413981	0.730597	0.530869	-0.0883238	0.444794	0.41201	-0.332666	0.00449315	0.0335532	-0.343469	0.00123871	0.00888136	-0.0140363	0.829198	0.590805	-0.0352604	0.579523	0.508814	-0.133213	0.404206	0.857026	-0.139349	0.371028	0.843033	-0.318661	0.27112	0.547643	-0.292535	0.304162	0.594674
ENSG00000166347	CYB5A	cytochrome b5 type A [Source:HGNC Symbol;Acc:HGNC:2570]	1528	small molecule metabolic process; oxidation-reduction process; response to cadmium ion; hydrogen ion transmembrane transport		*	Hepatocytes	-0.239239	0.0472373	0.136032	-0.260761	0.022338	0.0877513	-0.337271	0.00449355	0.0335532	-0.331375	0.00187262	0.0109684	-0.110626	0.0909262	0.230529	-0.12053	0.0559581	0.181594	-0.274328	0.0832929	0.770751	-0.254265	0.100862	0.729644	-0.478077	0.0967052	0.416286	-0.43816	0.122429	0.471428
ENSG00000108039	XPNPEP1	X-prolyl aminopeptidase 1 [Source:HGNC Symbol;Acc:HGNC:12822]	7511					0.060081	0.616281	0.491262	0.132796	0.24965	0.310031	0.331839	0.00449613	0.0335532	0.381052	0.00030843	0.00447421	0.0211926	0.743998	0.566188	0.0567168	0.372157	0.420018	0.144252	0.360901	0.851683	0.116644	0.454275	0.852214	0.169658	0.554546	0.669796	0.133696	0.639394	0.728386
ENSG00000140859	KIFC3	kinesin family member C3 [Source:HGNC Symbol;Acc:HGNC:6326]	3801	metabolic process				0.351378	0.00359878	0.0363826	0.304703	0.00727673	0.0474363	0.341859	0.00450602	0.0335598	0.276768	0.0099913	0.0267984	0.165304	0.0118661	0.0941471	0.148325	0.0180536	0.10692	0.169732	0.286086	0.845772	0.186765	0.229736	0.812385	0.445231	0.121969	0.441077	0.493266	0.081509	0.421773
ENSG00000131495	NDUFA2	NADH:ubiquinone oxidoreductase subunit A2 [Source:HGNC Symbol;Acc:HGNC:7685]	4695	small molecule metabolic process; respiratory electron transport chain; cellular metabolic process; mitochondrial electron transport, NADH to ubiquinone				-0.110258	0.370294	0.384302	-0.143847	0.212109	0.283916	-0.341062	0.00450865	0.0335598	-0.343125	0.00125366	0.00892387	-0.0674458	0.310797	0.387001	-0.0848467	0.180669	0.306821	0.309897	0.0455644	0.760854	0.302596	0.0501551	0.682706	0.237853	0.402463	0.611968	0.245439	0.389026	0.636704
ENSG00000152952	PLOD2	procollagen-lysine,2-oxoglutarate 5-dioxygenase 2 [Source:HGNC Symbol;Acc:HGNC:9082]	5352	extracellular matrix organization				0.110059	0.368728	0.383618	0.123845	0.28323	0.330138	0.339134	0.00453403	0.0336528	0.323697	0.0024144	0.0126427	0.0350467	0.597351	0.516965	0.04785	0.451782	0.457496	-0.214398	0.159499	0.814915	-0.272555	0.0782952	0.700197	0.040373	0.884652	0.758369	-0.0162234	0.954687	0.804419
ENSG00000184719	RNLS	renalase, FAD dependent amine oxidase [Source:HGNC Symbol;Acc:HGNC:25641]	55328	oxidation-reduction process				-0.131194	0.29068	0.339631	-0.107562	0.351708	0.367935	-0.344182	0.00453648	0.0336528	-0.260169	0.0156739	0.0353647	-0.0578025	0.390072	0.43064	-0.0460119	0.469398	0.464513	0.241668	0.130619	0.803302	0.242133	0.118447	0.756576	-0.159136	0.585686	0.680476	-0.146545	0.607505	0.718135
ENSG00000186377	CYP4X1	cytochrome P450 family 4 subfamily X member 1 [Source:HGNC Symbol;Acc:HGNC:20244]	260293	oxidation-reduction process	oxidation-reduction process			-0.444677	0.00016547	0.00869147	-0.407497	0.000263593	0.00966452	-0.339517	0.00453867	0.0336528	-0.293601	0.0061586	0.0206253	-0.237616	0.000202386	0.0204913	-0.22386	0.000269384	0.0180959	0.196759	0.209967	0.826434	0.185976	0.231725	0.812385	0.311159	0.275432	0.549359	0.288209	0.31141	0.597559
ENSG00000237310	LINC03011	long intergenic non-protein coding RNA 3011 [Source:HGNC Symbol;Acc:HGNC:56136]	100289098					-0.174832	0.136783	0.233538	-0.175516	0.127087	0.220165	-0.326638	0.00455033	0.0336959	-0.288859	0.00707786	0.0222785	-0.0906576	0.154099	0.288759	-0.0891777	0.159203	0.289951	0.325442	0.0337069	0.725558	0.334296	0.0300882	0.624376	0.558081	0.0452155	0.343499	0.594701	0.0350067	0.338545
ENSG00000250988	SNHG21	small nucleolar RNA host gene 21 [Source:HGNC Symbol;Acc:HGNC:50284]	100505616					-0.0952069	0.43964	0.418616	-0.121507	0.292474	0.335815	-0.340669	0.0045775	0.0338535	-0.333212	0.00176051	0.0106411	-0.0960917	0.147686	0.28396	-0.10815	0.086958	0.223245	0.206644	0.191472	0.822077	0.179937	0.247352	0.819377	0.599357	0.0354964	0.31565	0.616901	0.0285938	0.325636
ENSG00000110871	COQ5	coenzyme Q5, methyltransferase [Source:HGNC Symbol;Acc:HGNC:28722]	84274	small molecule metabolic process; methylation				-0.285436	0.0190339	0.0838332	-0.300529	0.0081525	0.0502908	-0.341257	0.00458656	0.0338771	-0.339319	0.00143001	0.00949674	-0.139962	0.0340898	0.149969	-0.150215	0.0165929	0.102602	0.217303	0.174739	0.816199	0.222017	0.152692	0.784872	0.17014	0.560108	0.671458	0.218437	0.443502	0.659238
ENSG00000111707	SUDS3	SDS3 homolog, SIN3A corepressor complex component [Source:HGNC Symbol;Acc:HGNC:29545]	64426	positive regulation of apoptotic process; chromatin organization				0.233437	0.0501326	0.140052	0.222434	0.0522439	0.13922	0.332351	0.00460837	0.0339945	0.285872	0.00771734	0.0234213	0.111866	0.0834936	0.222495	0.104604	0.0979909	0.235168	0.11973	0.447796	0.862395	0.0827803	0.595657	0.87903	0.480632	0.0912007	0.410966	0.467675	0.0988972	0.442057
ENSG00000267534	S1PR2	sphingosine-1-phosphate receptor 2 [Source:HGNC Symbol;Acc:HGNC:3169]	9294	positive regulation of peptidyl-threonine phosphorylation; positive regulation of cell proliferation				0.129083	0.286535	0.337029	0.128118	0.266842	0.320081	0.335114	0.00461877	0.0340277	0.305555	0.00429341	0.0170531	0.0441624	0.501214	0.478906	0.0477398	0.452827	0.457885	0.313737	0.047927	0.765133	0.297904	0.0538998	0.682706	0.300417	0.300819	0.565356	0.276039	0.332397	0.610835
ENSG00000148700	ADD3	adducin 3 [Source:HGNC Symbol;Acc:HGNC:245]	120	response to drug				0.113191	0.348925	0.372416	0.147191	0.201584	0.278766	0.33404	0.00462691	0.0340441	0.330429	0.00193287	0.0112092	0.0571859	0.381933	0.4266	0.0753644	0.234892	0.345753	0.207049	0.198715	0.824621	0.225618	0.146072	0.782191	0.600701	0.0385561	0.323933	0.612899	0.0296704	0.327837
ENSG00000009950	MLXIPL	MLX interacting protein like [Source:HGNC Symbol;Acc:HGNC:12744]	51085	small molecule metabolic process; triglyceride homeostasis		*	Hepatocytes | Cholangiocytes	-0.118562	0.324603	0.358575	-0.195272	0.0891259	0.182363	-0.332741	0.00463447	0.0340562	-0.38525	0.000261338	0.00412955	-0.0687134	0.29117	0.377149	-0.104074	0.0997286	0.238024	-0.218255	0.165282	0.815145	-0.217839	0.160653	0.785315	-0.316662	0.268529	0.546477	-0.306835	0.280993	0.583533
ENSG00000177963	RIC8A	RIC8 guanine nucleotide exchange factor A [Source:HGNC Symbol;Acc:HGNC:29550]	60626	positive regulation of GTPase activity				0.164986	0.182461	0.270474	0.167704	0.145123	0.235491	0.342808	0.00464535	0.0340927	0.306687	0.00414602	0.0166156	0.0971377	0.146466	0.283244	0.0980552	0.121221	0.257766	0.235791	0.142331	0.806994	0.241084	0.120071	0.757504	0.627358	0.0303617	0.299139	0.627425	0.0259201	0.316386
ENSG00000090263	MRPS33	mitochondrial ribosomal protein S33 [Source:HGNC Symbol;Acc:HGNC:16634]	51650					-0.0895164	0.464665	0.431258	-0.0869549	0.451905	0.415211	-0.33782	0.00466064	0.0341142	-0.294313	0.00603015	0.0204445	-0.0464765	0.48296	0.471799	-0.0480463	0.449922	0.456426	-0.0994858	0.535343	0.870651	-0.0566097	0.716797	0.893423	-0.238892	0.411984	0.617511	-0.210181	0.460975	0.66695
ENSG00000104880	ARHGEF18	Rho/Rac guanine nucleotide exchange factor 18 [Source:HGNC Symbol;Acc:HGNC:17090]	23370	actin cytoskeleton organization; regulation of cell shape; positive regulation of GTPase activity; small GTPase mediated signal transduction; regulation of small GTPase mediated signal transduction; positive regulation of apoptotic process; transforming growth factor beta receptor signaling pathway				0.215225	0.074915	0.172428	0.16845	0.143322	0.233398	0.335943	0.00466493	0.0341142	0.250215	0.0202799	0.0411937	0.11445	0.0801439	0.218119	0.0922818	0.145027	0.278252	-0.121053	0.442215	0.861348	-0.184006	0.236745	0.815886	-0.502199	0.0769888	0.391753	-0.570106	0.0434801	0.361885
ENSG00000186106	ANKRD46	ankyrin repeat domain 46 [Source:HGNC Symbol;Acc:HGNC:27229]	157567					-0.0855226	0.489768	0.441346	-0.0989976	0.391546	0.386731	-0.341506	0.0046752	0.0341142	-0.297762	0.00544074	0.0193766	-0.0119767	0.8583	0.599376	-0.0190276	0.765076	0.570816	0.383409	0.01096	0.63842	0.414952	0.0066963	0.49695	0.700593	0.0104477	0.235137	0.747373	0.00761265	0.243153
ENSG00000179743	SPEN-AS1	SPEN antisense RNA 1 [Source:HGNC Symbol;Acc:HGNC:55937]	729614					-0.338834	0.00399695	0.0377531	-0.30556	0.00710751	0.0467421	-0.331892	0.00468009	0.0341142	-0.282249	0.00856099	0.0248238	-0.156607	0.0145734	0.101892	-0.150525	0.0163634	0.101608	-0.110643	0.487943	0.869318	-0.0838807	0.59077	0.87903	0.0265657	0.927025	0.767912	0.00912056	0.974516	0.805933
ENSG00000117592	PRDX6	peroxiredoxin 6 [Source:HGNC Symbol;Acc:HGNC:16753]	9588	oxidation-reduction process; response to reactive oxygen species; response to oxidative stress				-0.129285	0.287128	0.33718	-0.186417	0.104849	0.198522	-0.33555	0.00468272	0.0341142	-0.366848	0.000531852	0.0057783	-0.0495818	0.451291	0.458504	-0.0792322	0.211547	0.329854	0.193382	0.230915	0.833695	0.164652	0.290099	0.831819	0.620318	0.0327424	0.304263	0.58574	0.0379174	0.346789
ENSG00000182670	TTC3	tetratricopeptide repeat domain 3 [Source:HGNC Symbol;Acc:HGNC:12393]	7267					-0.0190004	0.878329	0.579161	0.000510686	0.99648	0.587812	0.341796	0.00468381	0.0341142	0.296796	0.00560038	0.0197539	-0.0202138	0.763364	0.572811	-0.0106413	0.867299	0.596441	0.338152	0.032221	0.71947	0.368012	0.0166502	0.574659	0.374691	0.194926	0.499526	0.41631	0.14246	0.494537
ENSG00000136021	SCYL2	SCY1 like pseudokinase 2 [Source:HGNC Symbol;Acc:HGNC:19286]	55681	protein phosphorylation				0.0546767	0.65622	0.505452	0.104167	0.36719	0.375464	0.338294	0.00470116	0.0341973	0.345181	0.00116679	0.00864402	0.0225336	0.734625	0.562973	0.044904	0.480194	0.469654	0.163786	0.298276	0.845772	0.171905	0.269242	0.824143	0.468026	0.100083	0.421412	0.466717	0.099601	0.442431
ENSG00000085224	ATRX	ATRX chromatin remodeler [Source:HGNC Symbol;Acc:HGNC:886]	546	spermatogenesis				0.207496	0.0813342	0.178371	0.241428	0.0347883	0.111181	0.330439	0.00471368	0.0342452	0.343998	0.00121607	0.00884141	0.0822248	0.203584	0.321376	0.0991156	0.117196	0.253066	0.28596	0.0692697	0.770375	0.253609	0.101756	0.732224	0.492731	0.0850258	0.403675	0.509484	0.0718162	0.409019
ENSG00000184922	FMNL1	formin like 1 [Source:HGNC Symbol;Acc:HGNC:1212]	752	regulation of cell shape; small GTPase mediated signal transduction			NK-cells | B-cells | dendritic cells | monocytes | Macrophages | Plasma cells | T-cells	0.137983	0.236483	0.308054	0.232945	0.0418596	0.122786	0.321892	0.00473221	0.0342516	0.409438	9.63673e-05	0.00261984	0.092142	0.14315	0.28126	0.138787	0.0272309	0.129818	-0.280489	0.0764104	0.770375	-0.224397	0.148292	0.782669	-0.308872	0.285308	0.555999	-0.276453	0.331667	0.610835
ENSG00000117643	MAN1C1	mannosidase alpha class 1C member 1 [Source:HGNC Symbol;Acc:HGNC:19080]	57134				Hepatic stellate cells | Hepatocytes	-0.192619	0.117797	0.21733	-0.146984	0.202226	0.278937	-0.341084	0.00473618	0.0342516	-0.254243	0.0182922	0.0385962	-0.049735	0.457854	0.461168	-0.0353264	0.578812	0.508651	0.312994	0.0496966	0.768799	0.288543	0.062058	0.682706	0.76045	0.00805827	0.226034	0.722521	0.00997555	0.253076
ENSG00000130649	CYP2E1	cytochrome P450 family 2 subfamily E member 1 [Source:HGNC Symbol;Acc:HGNC:2631]	1571	small molecule metabolic process; oxidation-reduction process; xenobiotic metabolic process; drug metabolic process; exogenous drug catabolic process; epoxygenase P450 pathway; steroid metabolic process; response to ethanol		*	Hepatocytes	-0.184637	0.12039	0.219623	-0.253324	0.0265824	0.0966821	-0.329207	0.00473834	0.0342516	-0.385102	0.00026287	0.00412955	-0.102233	0.111852	0.251728	-0.134302	0.0327614	0.141009	0.392606	0.0113665	0.63842	0.356538	0.020481	0.584041	0.633337	0.0250968	0.289536	0.568234	0.0441893	0.363202
ENSG00000160932	LY6E	lymphocyte antigen 6 family member E [Source:HGNC Symbol;Acc:HGNC:6727]	4061					-0.156819	0.177089	0.266203	-0.221639	0.0531079	0.140435	-0.321194	0.00473834	0.0342516	-0.361574	0.000647155	0.00633727	-0.096416	0.124505	0.26462	-0.121426	0.054122	0.178776	0.247778	0.121655	0.797573	0.206272	0.184296	0.798251	0.30265	0.299592	0.564255	0.265991	0.350385	0.619549
ENSG00000123130	ACOT9	acyl-CoA thioesterase 9 [Source:HGNC Symbol;Acc:HGNC:17152]	23597				monocytes	0.188632	0.1125	0.21191	0.261177	0.0221191	0.0872376	0.329068	0.00476143	0.0343754	0.386571	0.000247942	0.00406638	0.0884445	0.169806	0.299816	0.123219	0.0505962	0.173419	0.1862	0.245766	0.840985	0.190151	0.221333	0.811777	0.181392	0.534598	0.663182	0.167103	0.557997	0.700513
ENSG00000138115	CYP2C8	cytochrome P450 family 2 subfamily C member 8 [Source:HGNC Symbol;Acc:HGNC:2622]	1558	small molecule metabolic process; oxidation-reduction process; xenobiotic metabolic process; drug metabolic process; omega-hydroxylase P450 pathway; exogenous drug catabolic process; epoxygenase P450 pathway; arachidonic acid metabolic process		*	Hepatocytes | Cholangiocytes	-0.320153	0.00720353	0.051084	-0.346622	0.00212954	0.0257537	-0.334124	0.00478017	0.0344535	-0.33927	0.00143244	0.00949674	-0.184376	0.00412519	0.0589268	-0.194182	0.0017427	0.0365197	-0.134107	0.401397	0.856092	-0.113879	0.465077	0.856902	-0.493975	0.0867006	0.406463	-0.505528	0.07409	0.413979
ENSG00000174705	SH3PXD2B	SH3 and PX domains 2B [Source:HGNC Symbol;Acc:HGNC:29242]	285590	extracellular matrix disassembly				0.0544296	0.65632	0.505452	0.0797608	0.490297	0.430301	0.336231	0.00478422	0.0344535	0.329264	0.00200939	0.0114849	0.0596417	0.366629	0.41839	0.0726415	0.252367	0.358135	-0.29975	0.0577672	0.770375	-0.322149	0.0367826	0.647868	-0.530809	0.0643823	0.375148	-0.558419	0.0480674	0.371589
ENSG00000267296	CEBPA-DT	CEBPA divergent transcript [Source:HGNC Symbol;Acc:HGNC:25710]	80054					-0.0582795	0.631596	0.496634	-0.136562	0.236376	0.301545	-0.334087	0.00479305	0.0344741	-0.377823	0.000349841	0.00477879	-0.0463897	0.48023	0.470544	-0.0814595	0.198877	0.320514	0.273404	0.0838158	0.770751	0.244419	0.114963	0.751278	-0.0641753	0.824598	0.747397	-0.0429824	0.880328	0.791514
ENSG00000139684	ESD	esterase D [Source:HGNC Symbol;Acc:HGNC:3465]	2098					-0.17633	0.148464	0.243971	-0.213681	0.0624284	0.152486	-0.337113	0.00480403	0.0344938	-0.344732	0.0011853	0.00870758	-0.0736224	0.265985	0.361449	-0.0921559	0.145583	0.278838	0.422815	0.00582576	0.605959	0.40987	0.00742783	0.509046	0.541758	0.0543031	0.358697	0.569484	0.0437146	0.362765
ENSG00000053371	AKR7A2	aldo-keto reductase family 7 member A2 [Source:HGNC Symbol;Acc:HGNC:389]	8574	small molecule metabolic process; oxidation-reduction process; xenobiotic metabolic process				-0.0759566	0.523684	0.454783	-0.143877	0.212015	0.283913	-0.327431	0.00481128	0.0344938	-0.367014	0.000528537	0.00575442	-0.0483182	0.453223	0.459257	-0.0774728	0.221953	0.337324	0.227493	0.146721	0.81233	0.212649	0.170967	0.785378	-0.0229625	0.936088	0.770507	-0.00995511	0.972185	0.805933
ENSG00000164904	ALDH7A1	aldehyde dehydrogenase 7 family member A1 [Source:HGNC Symbol;Acc:HGNC:877]	501	small molecule metabolic process; oxidation-reduction process; cellular nitrogen compound metabolic process				-0.155356	0.202504	0.283522	-0.20974	0.0675154	0.159152	-0.336237	0.00481376	0.0344938	-0.362164	0.000633189	0.0062828	-0.0836336	0.204809	0.321725	-0.109	0.0844663	0.219692	0.186223	0.234922	0.834814	0.163415	0.293761	0.831819	0.546603	0.0532663	0.356364	0.480511	0.0898432	0.432187
ENSG00000147408	CSGALNACT1	chondroitin sulfate N-acetylgalactosaminyltransferase 1 [Source:HGNC Symbol;Acc:HGNC:24290]	55790	extracellular matrix organization; glycosaminoglycan metabolic process				0.0737045	0.526252	0.456012	0.109153	0.344598	0.364275	0.319397	0.00485247	0.034728	0.324908	0.0023205	0.0123786	0.0585997	0.351083	0.410675	0.0703041	0.268062	0.366744	0.477413	0.00197311	0.579102	0.465879	0.00220632	0.457325	0.712604	0.0117163	0.242087	0.743382	0.0079551	0.246732
ENSG00000198315	ZKSCAN8	zinc finger with KRAB and SCAN domains 8 [Source:HGNC Symbol;Acc:HGNC:12983]	7745					-0.0033837	0.977933	0.605968	0.046261	0.689335	0.503406	0.335316	0.00488543	0.0348943	0.335292	0.00164091	0.0102695	-0.00350231	0.957799	0.627726	0.0181363	0.775784	0.573249	-0.232291	0.132531	0.803334	-0.239019	0.123321	0.762414	-0.48238	0.0847583	0.403592	-0.484059	0.0874601	0.430431
ENSG00000185813	PCYT2	phosphate cytidylyltransferase 2, ethanolamine [Source:HGNC Symbol;Acc:HGNC:8756]	5833	small molecule metabolic process				-0.269607	0.0265605	0.100219	-0.301139	0.00801894	0.0498816	-0.337849	0.00489286	0.0348943	-0.350034	0.000983102	0.00790122	-0.139151	0.034604	0.150552	-0.155664	0.0129387	0.089246	0.239228	0.13203	0.803334	0.188157	0.226254	0.812385	0.65534	0.0219319	0.277125	0.610313	0.0303839	0.329577
ENSG00000172955	ADH6	alcohol dehydrogenase 6 (class V) [Source:HGNC Symbol;Acc:HGNC:255]	130	small molecule metabolic process; xenobiotic metabolic process; response to ethanol		*	Hepatocytes	-0.31127	0.00909871	0.0574706	-0.348409	0.00201352	0.025129	-0.333438	0.00489388	0.0348943	-0.354568	0.000835659	0.00713237	-0.159372	0.0137733	0.100432	-0.176574	0.0046049	0.0558734	0.238548	0.108346	0.797116	0.321868	0.0369511	0.647868	0.367989	0.173423	0.486476	0.470546	0.0968127	0.441574
ENSG00000133639	BTG1	BTG anti-proliferation factor 1 [Source:HGNC Symbol;Acc:HGNC:1130]	694	cell migration; negative regulation of cell proliferation; negative regulation of cell growth; spermatogenesis				0.091693	0.450438	0.423734	0.15068	0.191009	0.272293	0.333454	0.00490294	0.0349157	0.365737	0.000554446	0.00587504	0.00804609	0.902739	0.611613	0.0434149	0.494912	0.475806	0.16806	0.27947	0.843627	0.206926	0.182895	0.798251	0.189786	0.502078	0.653157	0.225333	0.429196	0.651453
ENSG00000149187	CELF1	CUGBP Elav-like family member 1 [Source:HGNC Symbol;Acc:HGNC:2549]	10658					0.254873	0.0371066	0.119339	0.19444	0.0905192	0.183571	0.339062	0.00491924	0.0349854	0.225218	0.0372225	0.0593642	0.0796726	0.232318	0.33965	0.0553724	0.383647	0.425132	-0.242925	0.12618	0.798269	-0.274551	0.0760988	0.699728	-0.299553	0.300752	0.565356	-0.352136	0.215525	0.545433
ENSG00000103145	HCFC1R1	host cell factor C1 regulator 1 [Source:HGNC Symbol;Acc:HGNC:21198]	54985					-0.198369	0.10719	0.206743	-0.132065	0.252287	0.311299	-0.339706	0.00493016	0.0349854	-0.213202	0.0488717	0.0697386	-0.0917291	0.169436	0.299816	-0.0644347	0.310331	0.389946	0.224942	0.155278	0.814915	0.185749	0.2323	0.812385	0.838011	0.00295386	0.167478	0.735783	0.008645	0.249812
ENSG00000165417	GTF2A1	general transcription factor IIA subunit 1 [Source:HGNC Symbol;Acc:HGNC:4646]	2957					0.0446014	0.711592	0.523856	0.118093	0.306328	0.343707	0.330413	0.00493896	0.0349854	0.366332	0.000542238	0.00582964	0.0187079	0.77444	0.57561	0.0512654	0.420046	0.443469	0.20187	0.21165	0.828895	0.187546	0.227777	0.812385	0.397494	0.175249	0.487545	0.370358	0.19251	0.528714
ENSG00000113924	HGD	homogentisate 1,2-dioxygenase [Source:HGNC Symbol;Acc:HGNC:4892]	3081	small molecule metabolic process; oxidation-reduction process; cellular nitrogen compound metabolic process; L-phenylalanine catabolic process	oxidation-reduction process	*	Hepatocytes	-0.331948	0.00512463	0.0426152	-0.373747	0.000879649	0.0168854	-0.331966	0.00494188	0.0349854	-0.366219	0.000544519	0.00582983	-0.163244	0.0112774	0.0919105	-0.1846	0.00299269	0.0446745	-0.223513	0.155302	0.814915	-0.211272	0.173783	0.788817	-0.449352	0.115161	0.434696	-0.385872	0.174361	0.520131
ENSG00000169018	FEM1B	fem-1 homolog B [Source:HGNC Symbol;Acc:HGNC:3649]	10116	protein ubiquitination				-0.0245057	0.844731	0.568799	0.0014308	0.990139	0.586898	0.342586	0.00494309	0.0349854	0.302067	0.00477718	0.0179835	-0.00254458	0.970022	0.630243	0.00819407	0.897627	0.602704	-0.255847	0.104161	0.797116	-0.304465	0.0487242	0.682706	-0.409832	0.152394	0.472709	-0.483165	0.0880556	0.430431
ENSG00000151239	TWF1	twinfilin actin binding protein 1 [Source:HGNC Symbol;Acc:HGNC:9620]	5756					0.325203	0.00583438	0.0458897	0.36122	0.00133526	0.0204256	0.329857	0.00495801	0.0350341	0.367335	0.000522214	0.00573927	0.133023	0.0389525	0.158386	0.155307	0.0131545	0.0896703	0.44118	0.00473114	0.599014	0.470713	0.00197194	0.436043	0.886345	0.00167764	0.144164	0.911181	0.00101602	0.136646
ENSG00000129007	CALML4	calmodulin like 4 [Source:HGNC Symbol;Acc:HGNC:18445]	91860					-0.110109	0.369102	0.383706	-0.0857522	0.458205	0.417676	-0.336248	0.00496213	0.0350341	-0.250604	0.02008	0.0409697	-0.0306	0.64513	0.534872	-0.0204952	0.747542	0.564921	0.231392	0.146126	0.810693	0.18055	0.245734	0.819377	0.602413	0.0359631	0.317168	0.548606	0.0522217	0.376865
ENSG00000120915	EPHX2	epoxide hydrolase 2 [Source:HGNC Symbol;Acc:HGNC:3402]	2053	small molecule metabolic process; xenobiotic metabolic process; drug metabolic process; epoxygenase P450 pathway; cholesterol homeostasis; arachidonic acid metabolic process; response to toxic substance				-0.214199	0.0716539	0.169775	-0.269324	0.0181825	0.0786991	-0.328269	0.00498339	0.0351298	-0.355725	0.000801448	0.00696378	-0.106637	0.0979175	0.238462	-0.130269	0.0385148	0.154925	0.224712	0.141972	0.806994	0.178963	0.24994	0.820143	0.634352	0.0212509	0.275667	0.579011	0.0402339	0.352652
ENSG00000226124	FTCDNL1	formiminotransferase cyclodeaminase N-terminal like [Source:HGNC Symbol;Acc:HGNC:48661]	348751					-0.266397	0.0292722	0.10616	-0.242597	0.0338972	0.109986	-0.338789	0.00498788	0.0351298	-0.278473	0.00952536	0.0260922	-0.119439	0.0720935	0.206884	-0.109366	0.0834123	0.218334	0.252789	0.10749	0.797116	0.285475	0.0649409	0.6834	0.436345	0.12627	0.447106	0.503241	0.0754311	0.415493
ENSG00000083642	PDS5B	PDS5 cohesin associated factor B [Source:HGNC Symbol;Acc:HGNC:20418]	23047	negative regulation of cell proliferation				-0.00601211	0.961042	0.602002	-0.0344305	0.766109	0.525575	0.336555	0.00499701	0.0351511	0.23804	0.0274509	0.0487804	0.0112429	0.865926	0.602024	-0.00532135	0.933413	0.612164	-0.20695	0.191354	0.822077	-0.242037	0.118595	0.756576	-0.433339	0.131259	0.452465	-0.491717	0.0824866	0.421773
ENSG00000198732	SMOC1	SPARC related modular calcium binding 1 [Source:HGNC Symbol;Acc:HGNC:20318]	64093				Hepatocytes	-0.0831872	0.487949	0.440736	-0.162754	0.157512	0.247561	-0.328213	0.00502431	0.0353001	-0.372285	0.000432951	0.00521171	-0.0366235	0.572694	0.508241	-0.071451	0.26028	0.363213	-0.133471	0.405317	0.858212	-0.0992401	0.524526	0.867256	-0.0824519	0.777474	0.737515	-0.0525558	0.853942	0.786581
ENSG00000119280	C1orf198	chromosome 1 open reading frame 198 [Source:HGNC Symbol;Acc:HGNC:25900]	84886					0.131742	0.267002	0.327012	0.188375	0.101197	0.19523	0.325429	0.00503171	0.035309	0.349497	0.00100204	0.00796648	0.0708645	0.269824	0.363504	0.0933089	0.140553	0.273508	0.282706	0.0718633	0.770375	0.232261	0.134428	0.770693	0.894164	0.00138503	0.141376	0.805423	0.00390891	0.200828
ENSG00000132821	VSTM2L	V-set and transmembrane domain containing 2 like [Source:HGNC Symbol;Acc:HGNC:16096]	128434				Cholangiocytes	-0.270163	0.0271	0.10138	-0.223842	0.0507406	0.137779	-0.338553	0.00504802	0.0353628	-0.254249	0.0182895	0.0385962	-0.1268	0.0560779	0.186044	-0.111787	0.0766933	0.210125	-0.196683	0.215758	0.828895	-0.181327	0.243694	0.818516	-0.163909	0.571282	0.675266	-0.149204	0.600996	0.716049
ENSG00000116260	QSOX1	quiescin sulfhydryl oxidase 1 [Source:HGNC Symbol;Acc:HGNC:9756]	5768					0.0442465	0.714175	0.524575	0.0399202	0.73015	0.516793	0.330064	0.00505165	0.0353628	0.269197	0.0123091	0.0307265	0.0129203	0.84335	0.595282	0.00889682	0.888901	0.601613	0.164846	0.307719	0.845772	0.148009	0.341903	0.843033	0.26987	0.358033	0.591775	0.25118	0.377984	0.631302
ENSG00000095015	MAP3K1	mitogen-activated protein kinase kinase kinase 1 [Source:HGNC Symbol;Acc:HGNC:6848]	4214	protein phosphorylation; positive regulation of actin filament polymerization; toll-like receptor 9 signaling pathway; toll-like receptor 2 signaling pathway; toll-like receptor 5 signaling pathway; toll-like receptor 10 signaling pathway; innate immune response; transforming growth factor beta receptor signaling pathway; toll-like receptor TLR1:TLR2 signaling pathway; toll-like receptor TLR6:TLR…				-0.0998486	0.41181	0.406049	-0.00382859	0.973619	0.582826	0.332796	0.00506709	0.0354278	0.373152	0.000418853	0.00515084	-0.0691051	0.293211	0.378181	-0.0243216	0.702445	0.551185	0.0769039	0.63431	0.885285	0.0600684	0.700295	0.890075	0.30688	0.294665	0.560951	0.304608	0.284521	0.585035
ENSG00000163736	PPBP	pro-platelet basic protein [Source:HGNC Symbol;Acc:HGNC:9240]	5473	blood coagulation; platelet activation; platelet degranulation; cell chemotaxis			Macrophages	0.266783	0.0221705	0.0912777	0.342617	0.00241184	0.0272644	0.323105	0.00508008	0.0354756	0.40539	0.00011447	0.00283258	0.166613	0.00795831	0.0793693	0.205742	0.000872598	0.0287657	-0.274558	0.0840916	0.770751	-0.293697	0.0574503	0.682706	-0.194495	0.503459	0.653566	-0.219958	0.440324	0.656671
ENSG00000184640	SEPTIN9	septin 9 [Source:HGNC Symbol;Acc:HGNC:7323]	10801				dendritic cells	0.0917038	0.454206	0.426059	0.109375	0.343611	0.363649	0.334865	0.00509446	0.0355329	0.315459	0.00314901	0.0145833	0.0495162	0.455131	0.460158	0.0576087	0.364652	0.41704	0.230728	0.145059	0.808638	0.227393	0.142888	0.782191	0.655594	0.0213977	0.276331	0.667731	0.0175558	0.295502
ENSG00000242110	AMACR	alpha-methylacyl-CoA racemase [Source:HGNC Symbol;Acc:HGNC:451]	23600	small molecule metabolic process; bile acid metabolic process; cellular lipid metabolic process; bile acid biosynthetic process			Hepatocytes	-0.249948	0.033076	0.112785	-0.318439	0.00495181	0.0388275	-0.324105	0.00510487	0.0355477	-0.373014	0.000421067	0.00516285	-0.12269	0.053739	0.18362	-0.153692	0.0141711	0.0936623	0.216859	0.168408	0.816199	0.188273	0.225965	0.812385	0.221736	0.439691	0.630616	0.219441	0.441401	0.65749
ENSG00000116212	LRRC42	leucine rich repeat containing 42 [Source:HGNC Symbol;Acc:HGNC:28792]	115353					0.0983161	0.427264	0.412877	0.106816	0.355073	0.369755	0.338414	0.00510892	0.0355477	0.298401	0.00533736	0.0191954	0.0397464	0.553381	0.499381	0.0443253	0.485886	0.472228	0.211549	0.179152	0.816369	0.140835	0.365926	0.843033	0.537989	0.0586333	0.364397	0.48824	0.0847158	0.425128
ENSG00000136937	NCBP1	nuclear cap binding protein subunit 1 [Source:HGNC Symbol;Acc:HGNC:7658]	4686					0.313894	0.00915259	0.057605	0.296729	0.0090292	0.0531144	0.334858	0.00511722	0.0355625	0.291253	0.00659965	0.0213291	0.185473	0.0042729	0.0600436	0.175081	0.00497867	0.057982	0.257106	0.109931	0.797116	0.242963	0.117173	0.755697	0.163402	0.578271	0.677619	0.136979	0.631182	0.725106
ENSG00000123240	OPTN	optineurin [Source:HGNC Symbol;Acc:HGNC:17142]	10133	signal transduction; positive regulation of cell proliferation				0.104248	0.398499	0.3995	0.113312	0.326435	0.354313	0.337194	0.00514842	0.0357362	0.292592	0.00634485	0.0209253	0.00505854	0.939763	0.623001	0.015437	0.808461	0.5815	-0.185792	0.248611	0.841179	-0.162771	0.29568	0.831819	-0.933811	0.00103905	0.132253	-0.897973	0.00121403	0.139177
ENSG00000113194	FAF2	Fas associated factor family member 2 [Source:HGNC Symbol;Acc:HGNC:24666]	23197					0.376203	0.00153038	0.0241742	0.34751	0.00207117	0.0252997	0.332763	0.00516618	0.0357928	0.285142	0.00788122	0.0236932	0.180317	0.00528075	0.0654833	0.168342	0.00702202	0.0682865	0.207094	0.174841	0.816199	0.103562	0.506584	0.863225	0.527887	0.0555442	0.361955	0.408022	0.150673	0.502879
ENSG00000161542	PRPSAP1	phosphoribosyl pyrophosphate synthetase associated protein 1 [Source:HGNC Symbol;Acc:HGNC:9466]	5635					-0.0569197	0.646476	0.501454	-0.0998357	0.387532	0.38548	-0.338273	0.005169	0.0357928	-0.326998	0.00216618	0.011995	-0.00240382	0.971459	0.630721	-0.0240578	0.705524	0.552141	0.324987	0.0346553	0.727113	0.253426	0.102008	0.732224	0.323452	0.251169	0.53746	0.277545	0.329752	0.60907
ENSG00000115541	HSPE1	heat shock protein family E (Hsp10) member 1 [Source:HGNC Symbol;Acc:HGNC:5269]	3336					0.0101092	0.934728	0.595728	-0.0136849	0.905902	0.565289	-0.336225	0.00517558	0.0357954	-0.307656	0.00402353	0.0164295	0.0177704	0.790144	0.579908	0.00419406	0.947496	0.615079	-0.251824	0.114641	0.797116	-0.212734	0.170792	0.785315	-0.342936	0.238192	0.531334	-0.335856	0.237679	0.555265
ENSG00000166181	API5	apoptosis inhibitor 5 [Source:HGNC Symbol;Acc:HGNC:594]	8539		apoptotic process			0.357683	0.0028689	0.0328894	0.344981	0.00224137	0.0263698	0.334975	0.0051952	0.035888	0.310737	0.00365528	0.0155569	0.204017	0.00162	0.0399107	0.198647	0.00134108	0.0338213	0.135704	0.386522	0.854871	0.147837	0.342468	0.843033	0.496594	0.0789536	0.396016	0.543891	0.0543201	0.380372
ENSG00000090447	TFAP4	transcription factor AP-4 [Source:HGNC Symbol;Acc:HGNC:11745]	7023					-0.189944	0.120906	0.220241	-0.209041	0.0684513	0.16025	-0.335665	0.00520478	0.0359111	-0.32808	0.00209001	0.0117501	-0.081114	0.222105	0.333707	-0.0957122	0.130491	0.266187	0.237086	0.126446	0.798269	0.283673	0.0666838	0.6834	0.607817	0.0298265	0.299072	0.661059	0.0187536	0.301011
ENSG00000143443	C1orf56	chromosome 1 open reading frame 56 [Source:HGNC Symbol;Acc:HGNC:26045]	54964					-0.259613	0.0316758	0.11026	-0.23133	0.0433336	0.125747	-0.33317	0.00522022	0.0359745	-0.290316	0.00678341	0.0216594	-0.0873098	0.1853	0.30917	-0.0841054	0.184546	0.310347	0.390059	0.0140961	0.638764	0.361681	0.0186793	0.575376	0.303933	0.298942	0.564099	0.282721	0.320764	0.604461
ENSG00000136933	RABEPK	Rab9 effector protein with kelch motifs [Source:HGNC Symbol;Acc:HGNC:16896]	10244					0.0570753	0.646133	0.501339	0.00733389	0.94949	0.576095	-0.3381	0.00527283	0.0362875	-0.319644	0.00275396	0.0134553	0.0176642	0.792918	0.580189	-0.00331866	0.958444	0.616568	0.135077	0.392501	0.854871	0.126904	0.415442	0.848147	0.611528	0.0310962	0.299139	0.557408	0.0484822	0.372678
ENSG00000150459	SAP18	Sin3A associated protein 18 [Source:HGNC Symbol;Acc:HGNC:10530]	10284					-0.205036	0.0936902	0.193186	-0.208007	0.0698555	0.161834	-0.33512	0.00527883	0.0362875	-0.314662	0.00322982	0.0148015	-0.0905886	0.172224	0.301454	-0.0985256	0.119423	0.255617	0.23575	0.137818	0.804454	0.180511	0.245837	0.819377	0.442346	0.125007	0.445918	0.407388	0.151316	0.503955
ENSG00000263400	TMEM220-AS1	TMEM220 antisense RNA 1 [Source:HGNC Symbol;Acc:HGNC:44357]	101101775					-0.14201	0.252736	0.318029	-0.151452	0.188723	0.271041	-0.338683	0.00528453	0.0362875	-0.303692	0.00454609	0.0176689	-0.0791174	0.238817	0.344222	-0.0830015	0.190431	0.315089	0.107685	0.496866	0.8698	0.114074	0.46431	0.856902	0.623516	0.0282706	0.297417	0.63376	0.0244153	0.311327
ENSG00000066044	ELAVL1	ELAV like RNA binding protein 1 [Source:HGNC Symbol;Acc:HGNC:3312]	1994					0.0499186	0.680954	0.513772	0.0798838	0.489626	0.430217	0.33001	0.00529636	0.0363255	0.3133	0.00337211	0.0150037	0.0451789	0.491226	0.475717	0.0544118	0.391986	0.429364	0.421937	0.00697316	0.605959	0.45152	0.00305792	0.457325	0.417932	0.146955	0.468029	0.47897	0.0908945	0.432934
ENSG00000120008	WDR11	WD repeat domain 11 [Source:HGNC Symbol;Acc:HGNC:13831]	55717					0.379468	0.0015869	0.0244837	0.388646	0.00052445	0.0131668	0.335706	0.00530726	0.0363569	0.332821	0.00178383	0.0107378	0.164451	0.0123001	0.0955812	0.176698	0.00457501	0.0556021	-0.219242	0.159285	0.814915	-0.243771	0.115943	0.753148	-0.463821	0.100344	0.42149	-0.463566	0.101942	0.445174
ENSG00000082701	GSK3B	glycogen synthase kinase 3 beta [Source:HGNC Symbol;Acc:HGNC:4617]	2932	intracellular signal transduction; protein phosphorylation; cell migration; axon guidance; positive regulation of peptidyl-threonine phosphorylation; positive regulation of axon extension; canonical Wnt signaling pathway; positive regulation of GTPase activity; positive regulation of protein catabolic process; peptidyl-serine phosphorylation; intrinsic apoptotic signaling pathway in response to e…				0.273722	0.0182902	0.0819127	0.340558	0.00256961	0.0277916	0.320055	0.00531553	0.0363704	0.392281	0.000197039	0.00365002	0.103545	0.101773	0.241912	0.139906	0.0259819	0.127651	0.191752	0.227282	0.832847	0.152911	0.326075	0.839558	0.898486	0.00140497	0.141376	0.869288	0.00176979	0.149713
ENSG00000171428	NAT1	N-acetyltransferase 1 [Source:HGNC Symbol;Acc:HGNC:7645]	9	small molecule metabolic process; xenobiotic metabolic process				-0.296521	0.0138648	0.0716576	-0.325926	0.00398596	0.0347821	-0.332855	0.00532685	0.0363896	-0.340069	0.00139358	0.00934457	-0.123055	0.0609518	0.192571	-0.138802	0.0272137	0.129818	0.273861	0.0874904	0.776225	0.229407	0.139341	0.777616	0.861897	0.0025803	0.1617	0.802581	0.00404332	0.204408
ENSG00000273344	PAXIP1-DT	PAXIP1 divergent transcript [Source:HGNC Symbol;Acc:HGNC:27328]	202781					-0.274353	0.0221662	0.0912777	-0.249595	0.0289562	0.100952	-0.330495	0.00533097	0.0363896	-0.294951	0.0059169	0.0202704	-0.115499	0.0768485	0.213574	-0.114807	0.0689274	0.200081	0.275798	0.0866837	0.772937	0.266334	0.0854665	0.708518	0.555414	0.0569463	0.362109	0.553088	0.0502891	0.374262
ENSG00000182022	CHST15	carbohydrate sulfotransferase 15 [Source:HGNC Symbol;Acc:HGNC:18137]	51363	glycosaminoglycan metabolic process				0.0181282	0.879424	0.579617	0.112741	0.328893	0.355609	0.324401	0.00533845	0.0363975	0.392168	0.000197946	0.00365368	0.0613599	0.341402	0.405769	0.103681	0.101033	0.239129	0.181794	0.245467	0.840533	0.19326	0.21381	0.804938	0.37593	0.18544	0.493572	0.398252	0.160805	0.510247
ENSG00000187048	CYP4A11	cytochrome P450 family 4 subfamily A member 11 [Source:HGNC Symbol;Acc:HGNC:2642]	1579	small molecule metabolic process; oxidation-reduction process; xenobiotic metabolic process; omega-hydroxylase P450 pathway; epoxygenase P450 pathway; fatty acid metabolic process; cellular lipid metabolic process; arachidonic acid metabolic process		*	Hepatocytes	-0.245765	0.0421689	0.128274	-0.26452	0.0204232	0.0839911	-0.33208	0.00535802	0.0364417	-0.318476	0.00285952	0.0138271	-0.134056	0.0404829	0.160684	-0.140252	0.0256058	0.126986	0.0246703	0.878933	0.911161	0.0144534	0.926235	0.914783	0.569847	0.050134	0.350283	0.559398	0.0476685	0.370942
ENSG00000196923	PDLIM7	PDZ and LIM domain 7 [Source:HGNC Symbol;Acc:HGNC:22958]	9260	actin cytoskeleton organization				0.224821	0.0571684	0.150865	0.271168	0.0173799	0.0768577	0.323951	0.0053722	0.0364417	0.357194	0.000759809	0.00678135	0.108316	0.0910319	0.230529	0.129882	0.0391094	0.155738	-0.463047	0.00342024	0.579102	-0.453539	0.00292264	0.457325	-0.594917	0.0407887	0.33152	-0.568152	0.0442205	0.363202
ENSG00000163586	FABP1	fatty acid binding protein 1 [Source:HGNC Symbol;Acc:HGNC:3555]	2168	small molecule metabolic process; cellular lipid metabolic process	cellular response to hypoxia; positive regulation of cell proliferation	*	Hepatocytes	-0.362987	0.00167485	0.0251333	-0.381992	0.000662599	0.0143039	-0.32221	0.00537223	0.0364417	-0.32093	0.00264181	0.0132163	-0.216989	0.000474398	0.0246222	-0.220116	0.000346699	0.0192621	0.230877	0.142702	0.806994	0.237055	0.126473	0.76667	0.333713	0.244356	0.534573	0.348272	0.220645	0.548029
ENSG00000110395	CBL	Cbl proto-oncogene [Source:HGNC Symbol;Acc:HGNC:1541]	867	protein ubiquitination; negative regulation of epidermal growth factor receptor signaling pathway; transforming growth factor beta receptor signaling pathway				0.0678878	0.571361	0.474189	0.109476	0.343165	0.363386	0.325582	0.00537836	0.0364417	0.339012	0.00144519	0.00955379	0.0588895	0.363443	0.416564	0.0770916	0.224254	0.338801	0.391123	0.0110469	0.63842	0.432835	0.00460257	0.457325	0.46034	0.103207	0.423491	0.528723	0.0615458	0.391583
ENSG00000181827	RFX7	regulatory factor X7 [Source:HGNC Symbol;Acc:HGNC:25777]	64864					0.00319735	0.979291	0.606072	0.0497659	0.667142	0.495814	0.334036	0.00538388	0.0364417	0.322246	0.00253135	0.0129698	0.0375051	0.57325	0.508241	0.0528512	0.405761	0.437432	-0.23964	0.134995	0.803334	-0.25501	0.0998527	0.729458	-0.798488	0.00533521	0.210203	-0.784231	0.00501479	0.221624
ENSG00000125354	SEPTIN6	septin 6 [Source:HGNC Symbol;Acc:HGNC:15848]	23157				dendritic cells | Plasma cells	0.253037	0.0372627	0.119622	0.235207	0.0398661	0.119747	0.333525	0.0053876	0.0364417	0.288476	0.00715713	0.0224418	0.126187	0.0553496	0.185402	0.120595	0.0558237	0.181238	-0.301814	0.058956	0.770375	-0.296603	0.054978	0.682706	-0.383715	0.188381	0.494694	-0.405937	0.152794	0.50604
ENSG00000067369	TP53BP1	tumor protein p53 binding protein 1 [Source:HGNC Symbol;Acc:HGNC:11999]	7158					-0.0830559	0.500054	0.444882	-0.0175545	0.879472	0.559016	0.33438	0.00538922	0.0364417	0.339503	0.00142101	0.00947909	-0.0531307	0.425008	0.446644	-0.02364	0.710409	0.553241	0.235535	0.144083	0.808638	0.21414	0.167955	0.785315	0.407804	0.1639	0.482025	0.391594	0.167995	0.514474
ENSG00000085265	FCN1	ficolin 1 [Source:HGNC Symbol;Acc:HGNC:3623]	2219				monocytes | Macrophages | Kupffer cells	-0.273863	0.0226989	0.0922328	-0.214109	0.061896	0.151667	-0.330533	0.00542478	0.0366392	-0.236294	0.0286373	0.0498733	-0.111266	0.0891772	0.22883	-0.0879706	0.164985	0.295537	0.284915	0.0737591	0.770375	0.27357	0.0771726	0.700197	0.326658	0.261519	0.543048	0.360834	0.204306	0.536884
ENSG00000106086	PLEKHA8	pleckstrin homology domain containing A8 [Source:HGNC Symbol;Acc:HGNC:30037]	84725	protein transport				0.06023	0.627406	0.495278	0.0827709	0.474026	0.424394	0.336373	0.00543694	0.0366783	0.314515	0.00324494	0.0148276	0.031351	0.64055	0.533582	0.0436436	0.492636	0.475039	0.304352	0.0552059	0.770375	0.264832	0.0872732	0.710236	0.713351	0.01268	0.246801	0.66015	0.0189221	0.301011
ENSG00000196562	SULF2	sulfatase 2 [Source:HGNC Symbol;Acc:HGNC:20392]	55959					0.551499	3.05296e-07	0.000349619	0.576588	7.48363e-08	0.000259293	0.313631	0.00548038	0.0369281	0.38399	0.000274723	0.00422131	0.265452	7.50341e-06	0.0051336	0.285451	1.91227e-06	0.00216296	0.270763	0.087289	0.775709	0.300183	0.052053	0.682706	0.193256	0.504532	0.653695	0.230506	0.41864	0.649222
ENSG00000152082	MZT2B	mitotic spindle organizing protein 2B [Source:HGNC Symbol;Acc:HGNC:25886]	80097					-0.227294	0.0576077	0.151266	-0.249417	0.0290741	0.101064	-0.327151	0.00551025	0.037086	-0.330898	0.00190278	0.0110722	-0.117807	0.069181	0.204178	-0.12807	0.0419933	0.159234	-0.0583607	0.712742	0.892162	-0.0687467	0.65951	0.887129	-0.430863	0.132047	0.452465	-0.375608	0.186221	0.522689
ENSG00000124839	RAB17	RAB17, member RAS oncogene family [Source:HGNC Symbol;Acc:HGNC:16523]	64284			*	Hepatocytes	-0.150214	0.21466	0.292342	-0.215045	0.0607432	0.150057	-0.328803	0.00552276	0.0371269	-0.367286	0.000523177	0.00573927	-0.0871855	0.182867	0.306731	-0.116297	0.065338	0.194344	-0.248488	0.107191	0.797116	-0.233868	0.13172	0.770693	-0.414312	0.139545	0.460073	-0.379444	0.181722	0.522263
ENSG00000166750	SLFN5	schlafen family member 5 [Source:HGNC Symbol;Acc:HGNC:28286]	162394				NK-cells	0.145063	0.226035	0.30089	0.193419	0.0922507	0.185393	0.3253	0.0055357	0.0371705	0.348896	0.00102363	0.00798587	0.0525301	0.418876	0.444602	0.0795705	0.209586	0.328112	0.322128	0.036724	0.732896	0.343444	0.0257537	0.608675	0.476317	0.0903081	0.410885	0.501728	0.0763289	0.41612
ENSG00000176402	GJC3	gap junction protein gamma 3 [Source:HGNC Symbol;Acc:HGNC:17495]	349149					-0.103968	0.394326	0.397066	-0.092103	0.425492	0.404055	-0.330495	0.00556089	0.0372961	-0.262126	0.0148838	0.0342638	-0.0528236	0.423901	0.44617	-0.0491841	0.43923	0.451629	0.070517	0.660842	0.887384	0.0702981	0.652319	0.884844	0.285247	0.327308	0.577282	0.28677	0.313846	0.598902
ENSG00000198911	SREBF2	sterol regulatory element binding transcription factor 2 [Source:HGNC Symbol;Acc:HGNC:11290]	6721					0.192226	0.113138	0.212666	0.187925	0.102029	0.195828	0.330157	0.00557017	0.037315	0.299924	0.00509794	0.0186847	0.086303	0.189644	0.312017	0.0871796	0.168858	0.29831	0.224234	0.162321	0.814915	0.184813	0.234681	0.813833	0.88263	0.00196785	0.148312	0.839769	0.00257283	0.180757
ENSG00000176387	HSD11B2	hydroxysteroid 11-beta dehydrogenase 2 [Source:HGNC Symbol;Acc:HGNC:5209]	3291	small molecule metabolic process; oxidation-reduction process; response to glucocorticoid; steroid metabolic process; response to drug				-0.223108	0.0585213	0.152465	-0.218541	0.0565902	0.144949	-0.321751	0.00559027	0.0374061	-0.301108	0.00491846	0.0183277	-0.0602793	0.348541	0.409	-0.0629067	0.322009	0.39591	-0.156919	0.321932	0.845772	-0.168279	0.279538	0.828115	-0.0515097	0.858272	0.754414	-0.0760636	0.789884	0.769674
ENSG00000171302	CANT1	calcium activated nucleotidase 1 [Source:HGNC Symbol;Acc:HGNC:19721]	124583	signal transduction				0.0200765	0.867377	0.576168	0.086019	0.456803	0.417002	0.324559	0.00561095	0.0374643	0.361394	0.000651444	0.00636428	0.0101309	0.876238	0.6054	0.0413546	0.515659	0.483577	-0.251035	0.107955	0.797116	-0.294659	0.0566225	0.682706	-0.424852	0.13446	0.455086	-0.450996	0.111715	0.461885
ENSG00000100647	SUSD6	sushi domain containing 6 [Source:HGNC Symbol;Acc:HGNC:19956]	9766					0.0351948	0.77229	0.545355	0.0819911	0.478213	0.425613	0.328374	0.00561198	0.0374643	0.343413	0.00124115	0.00888136	0.00708106	0.914325	0.615304	0.0322168	0.612727	0.521687	0.309521	0.0440043	0.754853	0.328002	0.0334156	0.638058	0.729886	0.00836183	0.227994	0.696566	0.0131064	0.273413
ENSG00000105778	AVL9	AVL9 cell migration associated [Source:HGNC Symbol;Acc:HGNC:28994]	23080	cell migration	cell migration			0.368579	0.00216429	0.0289701	0.33976	0.00263326	0.0277916	0.333115	0.00562284	0.0374934	0.293801	0.00612224	0.0206239	0.145957	0.0266752	0.133004	0.139303	0.0266484	0.128869	0.22455	0.142417	0.806994	0.271025	0.0800127	0.700276	0.536739	0.0524048	0.355251	0.60575	0.0316785	0.333708
ENSG00000137522	RNF121	ring finger protein 121 [Source:HGNC Symbol;Acc:HGNC:21070]	55298	protein ubiquitination				0.107144	0.374114	0.386648	0.120846	0.295124	0.337251	0.325924	0.00564496	0.0375923	0.304581	0.00442394	0.017391	0.0535544	0.411762	0.441016	0.05842	0.357906	0.413067	-0.107928	0.48884	0.869318	-0.0710907	0.648657	0.884515	-0.410554	0.145168	0.465735	-0.380248	0.18079	0.522099
ENSG00000164405	UQCRQ	ubiquinol-cytochrome c reductase complex III subunit VII [Source:HGNC Symbol;Acc:HGNC:29594]	27089	small molecule metabolic process; respiratory electron transport chain; cellular metabolic process; hydrogen ion transmembrane transport			Hepatocytes	-0.0573906	0.645094	0.500803	-0.0669523	0.5627	0.459685	-0.336287	0.00565072	0.0375923	-0.29122	0.00660612	0.0213291	-0.0596868	0.375197	0.423083	-0.0612374	0.335085	0.402477	-0.293189	0.0622114	0.770375	-0.322499	0.0365735	0.647868	-0.634028	0.0257273	0.291327	-0.677778	0.0158765	0.288371
ENSG00000095539	SEMA4G	semaphorin 4G [Source:HGNC Symbol;Acc:HGNC:10735]	57715				Hepatocytes	-0.262208	0.0293967	0.106352	-0.315219	0.00542767	0.0402525	-0.329039	0.00566247	0.0376142	-0.366663	0.000535548	0.00579401	-0.132781	0.0418417	0.163307	-0.159766	0.0106703	0.0816162	0.38178	0.0138192	0.638764	0.420729	0.00594266	0.487795	0.300915	0.292006	0.560277	0.321616	0.258315	0.569093
ENSG00000092529	CAPN3	calpain 3 [Source:HGNC Symbol;Acc:HGNC:1480]	825					-0.203722	0.0859407	0.183306	-0.262042	0.021669	0.086274	-0.322555	0.00567182	0.0376142	-0.37425	0.000401584	0.00502007	-0.107085	0.0954214	0.23554	-0.138427	0.0276433	0.130604	0.163767	0.302372	0.845772	0.0988398	0.526204	0.867256	0.292306	0.310728	0.568854	0.220632	0.438919	0.655894
ENSG00000138303	ASCC1	activating signal cointegrator 1 complex subunit 1 [Source:HGNC Symbol;Acc:HGNC:24268]	51008					0.055542	0.651084	0.503413	0.0771072	0.504881	0.437672	0.331241	0.00568152	0.0376142	0.310263	0.00370985	0.0156983	-0.0271891	0.682442	0.546379	-0.00736332	0.907958	0.606328	-0.333244	0.033233	0.725558	-0.376749	0.0141641	0.563079	-0.245224	0.393325	0.606831	-0.309061	0.277496	0.581452
ENSG00000198074	AKR1B10	aldo-keto reductase family 1 member B10 [Source:HGNC Symbol;Acc:HGNC:382]	57016				Cholangiocytes	0.353301	0.00224836	0.0291971	0.391173	0.000479298	0.0129637	0.320051	0.00568329	0.0376142	0.364637	0.000577677	0.00597061	0.176467	0.00496847	0.063717	0.197806	0.00140959	0.0341981	0.51639	0.000752035	0.453152	0.522621	0.000544899	0.309156	0.495054	0.0822414	0.40119	0.497687	0.0787689	0.419522
ENSG00000136521	NDUFB5	NADH:ubiquinone oxidoreductase subunit B5 [Source:HGNC Symbol;Acc:HGNC:7700]	4711	small molecule metabolic process; respiratory electron transport chain; cellular metabolic process; mitochondrial electron transport, NADH to ubiquinone				-0.111217	0.366832	0.383124	-0.109717	0.342097	0.363087	-0.33295	0.00568666	0.0376142	-0.286137	0.00765861	0.0233511	-0.0469373	0.481896	0.471394	-0.0467423	0.462354	0.46174	0.443437	0.00486459	0.599014	0.417054	0.00641286	0.491239	0.637399	0.0271074	0.293493	0.647912	0.0213209	0.305717
ENSG00000111713	GYS2	glycogen synthase 2 [Source:HGNC Symbol;Acc:HGNC:4707]	2998	small molecule metabolic process; generation of precursor metabolites and energy		*	Hepatocytes	-0.26646	0.0270766	0.10138	-0.312329	0.0058888	0.0424631	-0.329296	0.00571224	0.0377036	-0.352264	0.000907848	0.00750434	-0.123087	0.0601174	0.19136	-0.145762	0.02021	0.112063	0.255875	0.108712	0.797116	0.25254	0.103229	0.733895	0.332969	0.252047	0.538209	0.332104	0.243001	0.560744
ENSG00000126218	F10	coagulation factor X [Source:HGNC Symbol;Acc:HGNC:3528]	2159			*	Hepatocytes | Fibroblasts	-0.200611	0.100092	0.200239	-0.233111	0.0417109	0.122423	-0.331187	0.00571327	0.0377036	-0.332549	0.00180027	0.0107677	-0.114935	0.0813513	0.219689	-0.128454	0.0413678	0.158465	0.355684	0.0235579	0.684653	0.365268	0.0175051	0.574659	0.611046	0.0324449	0.304263	0.603554	0.0323176	0.333895
ENSG00000124422	USP22	ubiquitin specific peptidase 22 [Source:HGNC Symbol;Acc:HGNC:12621]	23326	chromatin organization; proteasome-mediated ubiquitin-dependent protein catabolic process; cell cycle				0.228502	0.0607817	0.155646	0.191863	0.0949427	0.188406	0.331495	0.00572777	0.0377325	0.254416	0.0182109	0.0385458	0.126368	0.0551843	0.185097	0.10855	0.0857775	0.221388	0.366015	0.0206896	0.682754	0.32605	0.0345081	0.643484	0.517222	0.0735233	0.387189	0.511269	0.0708084	0.407077
ENSG00000185745	IFIT1	interferon induced protein with tetratricopeptide repeats 1 [Source:HGNC Symbol;Acc:HGNC:5407]	3434					-0.44453	0.000125361	0.00794075	-0.451098	4.60993e-05	0.00478945	-0.325337	0.00573074	0.0377325	-0.343121	0.00125384	0.00892387	-0.221839	0.000440823	0.0242923	-0.229346	0.000184422	0.0143913	0.122991	0.4471	0.862184	0.0941901	0.545887	0.872256	0.591471	0.041951	0.333678	0.543423	0.0545322	0.380372
ENSG00000120129	DUSP1	dual specificity phosphatase 1 [Source:HGNC Symbol;Acc:HGNC:3064]	1843	response to glucocorticoid; response to cAMP; response to oxidative stress				-0.172669	0.157399	0.250417	-0.152514	0.185614	0.268868	-0.330687	0.00574178	0.0377621	-0.275714	0.0102892	0.027319	-0.0586739	0.376218	0.42373	-0.0523843	0.409937	0.438814	0.159308	0.321025	0.845772	0.14396	0.355335	0.843033	0.189031	0.517356	0.658613	0.182894	0.52133	0.689743
ENSG00000105379	ETFB	electron transfer flavoprotein subunit beta [Source:HGNC Symbol;Acc:HGNC:3482]	2109	small molecule metabolic process; respiratory electron transport chain; cellular metabolic process			Hepatocytes	-0.157496	0.185876	0.272442	-0.211576	0.0651047	0.156303	-0.322079	0.00575275	0.037791	-0.350035	0.000983057	0.00790122	-0.108478	0.0911602	0.230571	-0.129294	0.0400259	0.157123	-0.225193	0.158313	0.814915	-0.187479	0.227945	0.812385	-0.359114	0.215955	0.515976	-0.288412	0.311067	0.597559
ENSG00000144827	ABHD10	abhydrolase domain containing 10, depalmitoylase [Source:HGNC Symbol;Acc:HGNC:25656]	55347					-0.271242	0.0243518	0.0957032	-0.26728	0.0191082	0.0807528	-0.328899	0.00576714	0.037802	-0.311376	0.0035827	0.0154721	-0.115785	0.0773042	0.214284	-0.119646	0.0578197	0.184795	-0.353015	0.0239726	0.684653	-0.321212	0.037347	0.647868	-0.294375	0.305409	0.566832	-0.303049	0.287009	0.585879
ENSG00000169896	ITGAM	integrin subunit alpha M [Source:HGNC Symbol;Acc:HGNC:6149]	3684	blood coagulation; extracellular matrix organization; cell adhesion; leukocyte migration; innate immune response; neutrophil chemotaxis; toll-like receptor signaling pathway			monocytes | dendritic cells | Macrophages | Kupffer cells | NK-cells	0.220896	0.069176	0.166116	0.246368	0.0311534	0.104855	0.330176	0.00577073	0.037802	0.341855	0.00131015	0.00916706	0.0741795	0.262141	0.359398	0.0951074	0.13297	0.268251	0.148076	0.360114	0.851683	0.133909	0.390073	0.843033	0.0565071	0.84783	0.752796	0.0435428	0.87878	0.791114
[truncated: 10,891 more rows]
