# Supplementary material for: Global molecular landscape of early MASLD progression in human obesity
Source: eLife. 2026 Mar 23;14:RP109534. doi: 10.7554/eLife.109534 (PMC13008360; doi:10.7554/eLife.109534)
Supplement: Supplementary file 6. [file elife-109534-supp6.xlsx]

## Sheet: Sheet1
Mito.Metab	MitoClass	Gene stable ID	HGNC symbol	Gene description	NCBI gene (formerly Entrezgene) ID	Phenotype	coef	pval	qval	significance	col
Metabolism	Carbohydrate metabolism	ENSG00000124370	MCEE	methylmalonyl-CoA epimerase [Source:HGNC Symbol;Acc:HGNC:16732]	84693	Steatosis	-0.46582	6.76643e-05	0.00647658	-4.16964	Negative
Metabolism	Carbohydrate metabolism	ENSG00000131473	ACLY	ATP citrate lyase [Source:HGNC Symbol;Acc:HGNC:115]	47	Steatosis	0.360374	0.00180383	0.0261939	2.7438	Positive
Metabolism	Carbohydrate metabolism	ENSG00000161267	BDH1	3-hydroxybutyrate dehydrogenase 1 [Source:HGNC Symbol;Acc:HGNC:1027]	622	Steatosis	-0.331903	0.0054853	0.044149	-2.2608	Negative
Metabolism	Carbohydrate metabolism	ENSG00000182054	IDH2	isocitrate dehydrogenase (NADP(+)) 2 [Source:HGNC Symbol;Acc:HGNC:5383]	3418	Steatosis	0.331725	0.00636691	0.0479219	2.19607	Positive
Metabolism	Lipid metabolism	ENSG00000087157	PGS1	phosphatidylglycerophosphate synthase 1 [Source:HGNC Symbol;Acc:HGNC:30029]	9489	Steatosis	0.394676	0.00111761	0.0209632	2.95171	Positive
Metabolism	Lipid metabolism	ENSG00000100243	CYB5R3	cytochrome b5 reductase 3 [Source:HGNC Symbol;Acc:HGNC:2873]	1727	Steatosis	0.528611	6.85774e-06	0.00259439	5.16382	Positive
Metabolism	Lipid metabolism	ENSG00000116882	HAO2	hydroxyacid oxidase 2 [Source:HGNC Symbol;Acc:HGNC:4810]	51179	Steatosis	-0.332699	0.00448937	0.0400367	-2.34781	Negative
Metabolism	Lipid metabolism	ENSG00000117054	ACADM	acyl-CoA dehydrogenase medium chain [Source:HGNC Symbol;Acc:HGNC:89]	34	Steatosis	-0.340315	0.00392848	0.0375658	-2.40577	Negative
Metabolism	Lipid metabolism	ENSG00000124370	MCEE	methylmalonyl-CoA epimerase [Source:HGNC Symbol;Acc:HGNC:16732]	84693	Steatosis	-0.46582	6.76643e-05	0.00647658	-4.16964	Negative
Metabolism	Lipid metabolism	ENSG00000163586	FABP1	fatty acid binding protein 1 [Source:HGNC Symbol;Acc:HGNC:3555]	2168	Steatosis	-0.362987	0.00167485	0.0251333	-2.77602	Negative
Metabolism	Lipid metabolism	ENSG00000175536	LIPT2	lipoyl(octanoyl) transferase 2 [Source:HGNC Symbol;Acc:HGNC:37216]	387787	Steatosis	-0.340332	0.00464629	0.0406296	-2.33289	Negative
Metabolism	Nucleotide metabolism	ENSG00000114956	DGUOK	deoxyguanosine kinase [Source:HGNC Symbol;Acc:HGNC:2858]	1716	Steatosis	0.31785	0.00678046	0.0496232	2.16874	Positive
Metabolism	Nucleotide metabolism	ENSG00000148339	SLC25A25	solute carrier family 25 member 25 [Source:HGNC Symbol;Acc:HGNC:20663]	114789	Steatosis	-0.470868	6.37909e-05	0.00647658	-4.19524	Negative
Metabolism	Nucleotide metabolism	ENSG00000151729	SLC25A4	solute carrier family 25 member 4 [Source:HGNC Symbol;Acc:HGNC:10990]	291	Steatosis	-0.478173	2.30771e-05	0.00453583	-4.63682	Negative
Metabolism	Nucleotide metabolism	ENSG00000165609	NUDT5	nudix hydrolase 5 [Source:HGNC Symbol;Acc:HGNC:8052]	11164	Steatosis	0.339374	0.00484736	0.0415786	2.31449	Positive
Metabolism	Nucleotide metabolism	ENSG00000166548	TK2	thymidine kinase 2 [Source:HGNC Symbol;Acc:HGNC:11831]	7084	Steatosis	0.422788	0.000448119	0.013534	3.34861	Positive
Metabolism	Nucleotide metabolism	ENSG00000171612	SLC25A33	solute carrier family 25 member 33 [Source:HGNC Symbol;Acc:HGNC:29681]	84275	Steatosis	-0.477535	5.40746e-05	0.00597982	-4.26701	Negative
Metabolism	Amino acid metabolism	ENSG00000008311	AASS	aminoadipate-semialdehyde synthase [Source:HGNC Symbol;Acc:HGNC:17366]	10157	Steatosis	-0.380782	0.000773474	0.01765	-3.11155	Negative
Metabolism	Amino acid metabolism	ENSG00000065154	OAT	ornithine aminotransferase [Source:HGNC Symbol;Acc:HGNC:8091]	4942	Steatosis	-0.448511	1.59204e-05	0.00368877	-4.79804	Negative
Metabolism	Amino acid metabolism	ENSG00000103507	BCKDK	branched chain keto acid dehydrogenase kinase [Source:HGNC Symbol;Acc:HGNC:16902]	10295	Steatosis	0.349617	0.00324501	0.034635	2.48878	Positive
Metabolism	Amino acid metabolism	ENSG00000123453	SARDH	sarcosine dehydrogenase [Source:HGNC Symbol;Acc:HGNC:10536]	1757	Steatosis	-0.318288	0.00625349	0.0474158	-2.20388	Negative
Metabolism	Amino acid metabolism	ENSG00000149124	GLYAT	glycine-N-acyltransferase [Source:HGNC Symbol;Acc:HGNC:13734]	10249	Steatosis	-0.373592	0.00168322	0.0252062	-2.77386	Negative
Metabolism	Amino acid metabolism	ENSG00000241935	HOGA1	4-hydroxy-2-oxoglutarate aldolase 1 [Source:HGNC Symbol;Acc:HGNC:25155]	112817	Steatosis	-0.335541	0.00581978	0.0458897	-2.23509	Negative
Metabolism	Electron carriers	ENSG00000137767	SQOR	sulfide quinone oxidoreductase [Source:HGNC Symbol;Acc:HGNC:20390]	58472	Steatosis	0.486541	4.51318e-05	0.0057892	4.34552	Positive
Metabolism	Electron carriers	ENSG00000172115	CYCS	cytochrome c, somatic [Source:HGNC Symbol;Acc:HGNC:19986]	54205	Steatosis	-0.349296	0.00371781	0.0368825	-2.42971	Negative
Metabolism	Electron carriers	ENSG00000205707	ETFRF1	electron transfer flavoprotein regulatory factor 1 [Source:HGNC Symbol;Acc:HGNC:27052]	144363	Steatosis	-0.38244	0.00122383	0.0216621	-2.91228	Negative
Metabolism	Vitamin metabolism	ENSG00000123453	SARDH	sarcosine dehydrogenase [Source:HGNC Symbol;Acc:HGNC:10536]	1757	Steatosis	-0.318288	0.00625349	0.0474158	-2.20388	Negative
Metabolism	Vitamin metabolism	ENSG00000160688	FLAD1	flavin adenine dinucleotide synthetase 1 [Source:HGNC Symbol;Acc:HGNC:24671]	80308	Steatosis	0.374954	0.00116626	0.0211827	2.9332	Positive
Metabolism	Vitamin metabolism	ENSG00000198074	AKR1B10	aldo-keto reductase family 1 member B10 [Source:HGNC Symbol;Acc:HGNC:382]	57016	Steatosis	0.353301	0.00224836	0.0291971	2.64813	Positive
Metabolism	Metals and cofactors	ENSG00000014919	COX15	cytochrome c oxidase assembly homolog COX15 [Source:HGNC Symbol;Acc:HGNC:2263]	1355	Steatosis	0.424189	0.0003839	0.0124931	3.41578	Positive
Metabolism	Metals and cofactors	ENSG00000068120	COASY	Coenzyme A synthase [Source:HGNC Symbol;Acc:HGNC:29932]	80347	Steatosis	0.424926	0.000371232	0.012444	3.43035	Positive
Metabolism	Metals and cofactors	ENSG00000122873	CISD1	CDGSH iron sulfur domain 1 [Source:HGNC Symbol;Acc:HGNC:30880]	55847	Steatosis	0.340914	0.00416104	0.0382656	2.3808	Positive
Metabolism	Metals and cofactors	ENSG00000123815	COQ8B	coenzyme Q8B [Source:HGNC Symbol;Acc:HGNC:19041]	79934	Steatosis	0.48679	3.81538e-05	0.00539401	4.41846	Positive
Metabolism	Metals and cofactors	ENSG00000135070	ISCA1	iron-sulfur cluster assembly 1 [Source:HGNC Symbol;Acc:HGNC:28660]	81689	Steatosis	-0.385376	0.00107145	0.0205924	-2.97003	Negative
Metabolism	Metals and cofactors	ENSG00000135469	COQ10A	coenzyme Q10A [Source:HGNC Symbol;Acc:HGNC:26515]	93058	Steatosis	-0.36179	0.00144431	0.0233297	-2.84034	Negative
Metabolism	Metals and cofactors	ENSG00000155287	SLC25A28	solute carrier family 25 member 28 [Source:HGNC Symbol;Acc:HGNC:23472]	81894	Steatosis	0.414035	0.000532026	0.0148941	3.27407	Positive
Metabolism	Metals and cofactors	ENSG00000163586	FABP1	fatty acid binding protein 1 [Source:HGNC Symbol;Acc:HGNC:3555]	2168	Steatosis	-0.362987	0.00167485	0.0251333	-2.77602	Negative
Metabolism	Metals and cofactors	ENSG00000172115	CYCS	cytochrome c, somatic [Source:HGNC Symbol;Acc:HGNC:19986]	54205	Steatosis	-0.349296	0.00371781	0.0368825	-2.42971	Negative
Metabolism	Metals and cofactors	ENSG00000213965	NUDT19	nudix hydrolase 19 [Source:HGNC Symbol;Acc:HGNC:32036]	390916	Steatosis	0.410866	0.000437079	0.013369	3.35944	Positive
Metabolism	Metals and cofactors	ENSG00000213995	NAXD	NAD(P)HX dehydratase [Source:HGNC Symbol;Acc:HGNC:25576]	55739	Steatosis	0.377101	0.00170081	0.0252592	2.76934	Positive
Metabolism	Detoxification	ENSG00000100243	CYB5R3	cytochrome b5 reductase 3 [Source:HGNC Symbol;Acc:HGNC:2873]	1727	Steatosis	0.528611	6.85774e-06	0.00259439	5.16382	Positive
Metabolism	Detoxification	ENSG00000104687	GSR	glutathione-disulfide reductase [Source:HGNC Symbol;Acc:HGNC:4623]	2936	Steatosis	0.345616	0.00441502	0.0398183	2.35507	Positive
Metabolism	Detoxification	ENSG00000149124	GLYAT	glycine-N-acyltransferase [Source:HGNC Symbol;Acc:HGNC:13734]	10249	Steatosis	-0.373592	0.00168322	0.0252062	-2.77386	Negative
Metabolism	Detoxification	ENSG00000198074	AKR1B10	aldo-keto reductase family 1 member B10 [Source:HGNC Symbol;Acc:HGNC:382]	57016	Steatosis	0.353301	0.00224836	0.0291971	2.64813	Positive
Metabolism	Detoxification	ENSG00000233276	GPX1	glutathione peroxidase 1 [Source:HGNC Symbol;Acc:HGNC:4553]	2876	Steatosis	0.369158	0.00226646	0.0293538	2.64465	Positive
Metabolism	Sulfur metabolism	ENSG00000137767	SQOR	sulfide quinone oxidoreductase [Source:HGNC Symbol;Acc:HGNC:20390]	58472	Steatosis	0.486541	4.51318e-05	0.0057892	4.34552	Positive
Others	Mitochondrial central dogma	ENSG00000006744	ELAC2	elaC ribonuclease Z 2 [Source:HGNC Symbol;Acc:HGNC:14198]	60528	Steatosis	0.431824	0.000240788	0.010263	3.61836	Positive
Others	Mitochondrial central dogma	ENSG00000011376	LARS2	leucyl-tRNA synthetase 2, mitochondrial [Source:HGNC Symbol;Acc:HGNC:17095]	23395	Steatosis	0.338149	0.00523135	0.043024	2.28139	Positive
Others	Mitochondrial central dogma	ENSG00000048544	MRPS10	mitochondrial ribosomal protein S10 [Source:HGNC Symbol;Acc:HGNC:14502]	55173	Steatosis	0.490353	2.76271e-05	0.00472818	4.55867	Positive
Others	Mitochondrial central dogma	ENSG00000067704	IARS2	isoleucyl-tRNA synthetase 2, mitochondrial [Source:HGNC Symbol;Acc:HGNC:29685]	55699	Steatosis	0.381859	0.00116223	0.0211827	2.93471	Positive
Others	Mitochondrial central dogma	ENSG00000076043	REXO2	RNA exonuclease 2 [Source:HGNC Symbol;Acc:HGNC:17851]	25996	Steatosis	0.335112	0.00548383	0.044149	2.26092	Positive
Others	Mitochondrial central dogma	ENSG00000100890	PRORP	protein only RNase P catalytic subunit [Source:HGNC Symbol;Acc:HGNC:19958]	9692	Steatosis	0.363056	0.00236315	0.0301176	2.62651	Positive
Others	Mitochondrial central dogma	ENSG00000103356	EARS2	glutamyl-tRNA synthetase 2, mitochondrial [Source:HGNC Symbol;Acc:HGNC:29419]	124454	Steatosis	0.371002	0.0020989	0.0284964	2.67801	Positive
Others	Mitochondrial central dogma	ENSG00000112855	HARS2	histidyl-tRNA synthetase 2, mitochondrial [Source:HGNC Symbol;Acc:HGNC:4817]	23438	Steatosis	0.327214	0.00613162	0.0468375	2.21242	Positive
Others	Mitochondrial central dogma	ENSG00000125871	MGME1	mitochondrial genome maintenance exonuclease 1 [Source:HGNC Symbol;Acc:HGNC:16205]	92667	Steatosis	0.336784	0.00474798	0.041197	2.32349	Positive
Others	Mitochondrial central dogma	ENSG00000132463	GRSF1	G-rich RNA sequence binding factor 1 [Source:HGNC Symbol;Acc:HGNC:4610]	2926	Steatosis	0.383754	0.00149194	0.023821	2.82625	Positive
Others	Mitochondrial central dogma	ENSG00000132591	ERAL1	Era like 12S mitochondrial rRNA chaperone 1 [Source:HGNC Symbol;Acc:HGNC:3424]	26284	Steatosis	0.326245	0.00477677	0.0413183	2.32087	Positive
Others	Mitochondrial central dogma	ENSG00000132676	DAP3	death associated protein 3 [Source:HGNC Symbol;Acc:HGNC:2673]	7818	Steatosis	0.372043	0.00143489	0.0232864	2.84318	Positive
Others	Mitochondrial central dogma	ENSG00000136270	TBRG4	transforming growth factor beta regulator 4 [Source:HGNC Symbol;Acc:HGNC:17443]	9238	Steatosis	0.41261	0.000578	0.0152691	3.23807	Positive
Others	Mitochondrial central dogma	ENSG00000162396	PARS2	prolyl-tRNA synthetase 2, mitochondrial [Source:HGNC Symbol;Acc:HGNC:30563]	25973	Steatosis	0.367515	0.00213391	0.0286702	2.67082	Positive
Others	Mitochondrial central dogma	ENSG00000165792	METTL17	methyltransferase like 17 [Source:HGNC Symbol;Acc:HGNC:19280]	64745	Steatosis	0.336054	0.00484619	0.0415786	2.3146	Positive
Others	Mitochondrial central dogma	ENSG00000204316	MRPL38	mitochondrial ribosomal protein L38 [Source:HGNC Symbol;Acc:HGNC:14033]	64978	Steatosis	0.379724	0.00154615	0.0242483	2.81075	Positive
Others	OXPHOS	ENSG00000014919	COX15	cytochrome c oxidase assembly homolog COX15 [Source:HGNC Symbol;Acc:HGNC:2263]	1355	Steatosis	0.424189	0.0003839	0.0124931	3.41578	Positive
Others	OXPHOS	ENSG00000101084	RAB5IF	RAB5 interacting factor [Source:HGNC Symbol;Acc:HGNC:15870]	55969	Steatosis	0.331043	0.00650277	0.0485803	2.1869	Positive
Others	OXPHOS	ENSG00000130770	ATP5IF1	ATP synthase inhibitory factor subunit 1 [Source:HGNC Symbol;Acc:HGNC:871]	93974	Steatosis	-0.325712	0.00538143	0.0439565	-2.2691	Negative
Others	OXPHOS	ENSG00000146066	HIGD2A	HIG1 hypoxia inducible domain family member 2A [Source:HGNC Symbol;Acc:HGNC:28311]	192286	Steatosis	-0.341083	0.00418594	0.0383783	-2.37821	Negative
Others	OXPHOS	ENSG00000156885	COX6A2	cytochrome c oxidase subunit 6A2 [Source:HGNC Symbol;Acc:HGNC:2279]	1339	Steatosis	-0.418954	0.000386275	0.012507	-3.4131	Negative
Others	OXPHOS	ENSG00000164898	FMC1	formation of mitochondrial complex V assembly factor 1 homolog [Source:HGNC Symbol;Acc:HGNC:26946]	154791	Steatosis	-0.394627	0.000731951	0.0173068	-3.13552	Negative
Others	OXPHOS	ENSG00000172115	CYCS	cytochrome c, somatic [Source:HGNC Symbol;Acc:HGNC:19986]	54205	Steatosis	-0.349296	0.00371781	0.0368825	-2.42971	Negative
Others	OXPHOS	ENSG00000177646	ACAD9	acyl-CoA dehydrogenase family member 9 [Source:HGNC Symbol;Acc:HGNC:21497]	28976	Steatosis	0.337037	0.00544296	0.044149	2.26416	Positive
Others	Mitochondrial dynamics and surveillance	ENSG00000015475	BID	BH3 interacting domain death agonist [Source:HGNC Symbol;Acc:HGNC:1050]	637	Steatosis	0.339795	0.00505411	0.0425205	2.29636	Positive
Others	Mitochondrial dynamics and surveillance	ENSG00000030110	BAK1	BCL2 antagonist/killer 1 [Source:HGNC Symbol;Acc:HGNC:949]	578	Steatosis	0.474802	5.68385e-05	0.00600817	4.24536	Positive
Others	Mitochondrial dynamics and surveillance	ENSG00000087088	BAX	BCL2 associated X, apoptosis regulator [Source:HGNC Symbol;Acc:HGNC:959]	581	Steatosis	0.382496	0.000888513	0.0191791	3.05134	Positive
Others	Mitochondrial dynamics and surveillance	ENSG00000128654	MTX2	metaxin 2 [Source:HGNC Symbol;Acc:HGNC:7506]	10651	Steatosis	0.347782	0.00315406	0.0343207	2.50113	Positive
Others	Mitochondrial dynamics and surveillance	ENSG00000158828	PINK1	PTEN induced kinase 1 [Source:HGNC Symbol;Acc:HGNC:14581]	65018	Steatosis	0.365103	0.00235005	0.0300573	2.62892	Positive
Others	Mitochondrial dynamics and surveillance	ENSG00000168710	AHCYL1	adenosylhomocysteinase like 1 [Source:HGNC Symbol;Acc:HGNC:344]	10768	Steatosis	0.323317	0.00670023	0.049482	2.17391	Positive
Others	Mitochondrial dynamics and surveillance	ENSG00000172115	CYCS	cytochrome c, somatic [Source:HGNC Symbol;Acc:HGNC:19986]	54205	Steatosis	-0.349296	0.00371781	0.0368825	-2.42971	Negative
Others	Mitochondrial dynamics and surveillance	ENSG00000176171	BNIP3	BCL2 interacting protein 3 [Source:HGNC Symbol;Acc:HGNC:1084]	664	Steatosis	-0.345602	0.00406301	0.0378793	-2.39115	Negative
Others	Mitochondrial dynamics and surveillance	ENSG00000214253	FIS1	fission, mitochondrial 1 [Source:HGNC Symbol;Acc:HGNC:21689]	51024	Steatosis	-0.355692	0.00260839	0.0316174	-2.58363	Negative
Others	Protein import, sorting and homeostasis	ENSG00000078618	NRDC	nardilysin convertase [Source:HGNC Symbol;Acc:HGNC:7995]	4898	Steatosis	0.386175	0.00109106	0.0206817	2.96215	Positive
Others	Protein import, sorting and homeostasis	ENSG00000107959	PITRM1	pitrilysin metallopeptidase 1 [Source:HGNC Symbol;Acc:HGNC:17663]	10531	Steatosis	0.457583	0.000116389	0.00787371	3.93409	Positive
Others	Protein import, sorting and homeostasis	ENSG00000119912	IDE	insulin degrading enzyme [Source:HGNC Symbol;Acc:HGNC:5381]	3416	Steatosis	0.417803	0.000407277	0.0129347	3.39011	Positive
Others	Protein import, sorting and homeostasis	ENSG00000128654	MTX2	metaxin 2 [Source:HGNC Symbol;Acc:HGNC:7506]	10651	Steatosis	0.347782	0.00315406	0.0343207	2.50113	Positive
Others	Protein import, sorting and homeostasis	ENSG00000158882	TOMM40L	translocase of outer mitochondrial membrane 40 like [Source:HGNC Symbol;Acc:HGNC:25756]	84134	Steatosis	0.406895	0.000717255	0.0170716	3.14433	Positive
Others	Protein import, sorting and homeostasis	ENSG00000197912	SPG7	SPG7 matrix AAA peptidase subunit, paraplegin [Source:HGNC Symbol;Acc:HGNC:11237]	6687	Steatosis	0.339523	0.00381074	0.0372337	2.41899	Positive
Others	Small molecule transport	ENSG00000013306	SLC25A39	solute carrier family 25 member 39 [Source:HGNC Symbol;Acc:HGNC:24279]	51629	Steatosis	0.440638	0.000172004	0.00878225	3.76446	Positive
Others	Small molecule transport	ENSG00000078668	VDAC3	voltage dependent anion channel 3 [Source:HGNC Symbol;Acc:HGNC:12674]	7419	Steatosis	0.329834	0.00607367	0.046593	2.21655	Positive
Others	Small molecule transport	ENSG00000089060	SLC8B1	solute carrier family 8 member B1 [Source:HGNC Symbol;Acc:HGNC:26175]	80024	Steatosis	0.420503	0.000475797	0.0139438	3.32258	Positive
Others	Small molecule transport	ENSG00000101986	ABCD1	ATP binding cassette subfamily D member 1 [Source:HGNC Symbol;Acc:HGNC:61]	215	Steatosis	0.397825	0.00097853	0.0199254	3.00943	Positive
Others	Small molecule transport	ENSG00000148339	SLC25A25	solute carrier family 25 member 25 [Source:HGNC Symbol;Acc:HGNC:20663]	114789	Steatosis	-0.470868	6.37909e-05	0.00647658	-4.19524	Negative
Others	Small molecule transport	ENSG00000151729	SLC25A4	solute carrier family 25 member 4 [Source:HGNC Symbol;Acc:HGNC:10990]	291	Steatosis	-0.478173	2.30771e-05	0.00453583	-4.63682	Negative
Others	Small molecule transport	ENSG00000154258	ABCA9	ATP binding cassette subfamily A member 9 [Source:HGNC Symbol;Acc:HGNC:39]	10350	Steatosis	-0.350306	0.00298689	0.0335229	-2.52478	Negative
Others	Small molecule transport	ENSG00000155287	SLC25A28	solute carrier family 25 member 28 [Source:HGNC Symbol;Acc:HGNC:23472]	81894	Steatosis	0.414035	0.000532026	0.0148941	3.27407	Positive
Others	Small molecule transport	ENSG00000171612	SLC25A33	solute carrier family 25 member 33 [Source:HGNC Symbol;Acc:HGNC:29681]	84275	Steatosis	-0.477535	5.40746e-05	0.00597982	-4.26701	Negative
Others	Signaling	ENSG00000072062	PRKACA	protein kinase cAMP-activated catalytic subunit alpha [Source:HGNC Symbol;Acc:HGNC:9380]	5566	Steatosis	0.33302	0.0026328	0.0316813	2.57958	Positive
Others	Signaling	ENSG00000078668	VDAC3	voltage dependent anion channel 3 [Source:HGNC Symbol;Acc:HGNC:12674]	7419	Steatosis	0.329834	0.00607367	0.046593	2.21655	Positive
Others	Signaling	ENSG00000088888	MAVS	mitochondrial antiviral signaling protein [Source:HGNC Symbol;Acc:HGNC:29233]	57506	Steatosis	0.325054	0.00668898	0.049482	2.17464	Positive
Others	Signaling	ENSG00000089060	SLC8B1	solute carrier family 8 member B1 [Source:HGNC Symbol;Acc:HGNC:26175]	80024	Steatosis	0.420503	0.000475797	0.0139438	3.32258	Positive
Others	Signaling	ENSG00000115468	EFHD1	EF-hand domain family member D1 [Source:HGNC Symbol;Acc:HGNC:29556]	80303	Steatosis	-0.383323	0.000989782	0.020041	-3.00446	Negative
Others	Signaling	ENSG00000148339	SLC25A25	solute carrier family 25 member 25 [Source:HGNC Symbol;Acc:HGNC:20663]	114789	Steatosis	-0.470868	6.37909e-05	0.00647658	-4.19524	Negative
Others	Signaling	ENSG00000151729	SLC25A4	solute carrier family 25 member 4 [Source:HGNC Symbol;Acc:HGNC:10990]	291	Steatosis	-0.478173	2.30771e-05	0.00453583	-4.63682	Negative
Others	Signaling	ENSG00000158828	PINK1	PTEN induced kinase 1 [Source:HGNC Symbol;Acc:HGNC:14581]	65018	Steatosis	0.365103	0.00235005	0.0300573	2.62892	Positive
Metabolism	Carbohydrate metabolism	ENSG00000005882	PDK2	pyruvate dehydrogenase kinase 2 [Source:HGNC Symbol;Acc:HGNC:8810]	5164	Fibrosis	-0.411747	0.000301499	0.013164	-3.52071	Negative
Metabolism	Carbohydrate metabolism	ENSG00000060762	MPC1	mitochondrial pyruvate carrier 1 [Source:HGNC Symbol;Acc:HGNC:21606]	51660	Fibrosis	-0.397246	0.000500638	0.0166721	-3.30048	Negative
Metabolism	Carbohydrate metabolism	ENSG00000087299	L2HGDH	L-2-hydroxyglutarate dehydrogenase [Source:HGNC Symbol;Acc:HGNC:20499]	79944	Fibrosis	-0.349978	0.0033433	0.0296955	-2.47582	Negative
Metabolism	Carbohydrate metabolism	ENSG00000091483	FH	fumarate hydratase [Source:HGNC Symbol;Acc:HGNC:3700]	2271	Fibrosis	-0.312725	0.00837043	0.044693	-2.07725	Negative
Metabolism	Carbohydrate metabolism	ENSG00000100889	PCK2	phosphoenolpyruvate carboxykinase 2, mitochondrial [Source:HGNC Symbol;Acc:HGNC:8725]	5106	Fibrosis	-0.384918	0.000956315	0.020059	-3.0194	Negative
Metabolism	Carbohydrate metabolism	ENSG00000119689	DLST	dihydrolipoamide S-succinyltransferase [Source:HGNC Symbol;Acc:HGNC:2911]	1743	Fibrosis	0.318956	0.00907237	0.0463366	2.04228	Positive
Metabolism	Carbohydrate metabolism	ENSG00000124370	MCEE	methylmalonyl-CoA epimerase [Source:HGNC Symbol;Acc:HGNC:16732]	84693	Fibrosis	-0.398778	0.000718734	0.0186799	-3.14343	Negative
Metabolism	Carbohydrate metabolism	ENSG00000131473	ACLY	ATP citrate lyase [Source:HGNC Symbol;Acc:HGNC:115]	47	Fibrosis	0.416631	0.000252865	0.0129812	3.59711	Positive
Metabolism	Carbohydrate metabolism	ENSG00000134240	HMGCS2	3-hydroxy-3-methylglutaryl-CoA synthase 2 [Source:HGNC Symbol;Acc:HGNC:5008]	3158	Fibrosis	-0.323287	0.00683752	0.0403661	-2.1651	Negative
Metabolism	Carbohydrate metabolism	ENSG00000146085	MMUT	methylmalonyl-CoA mutase [Source:HGNC Symbol;Acc:HGNC:7526]	4594	Fibrosis	-0.367611	0.00203749	0.0257227	-2.69091	Negative
Metabolism	Carbohydrate metabolism	ENSG00000161267	BDH1	3-hydroxybutyrate dehydrogenase 1 [Source:HGNC Symbol;Acc:HGNC:1027]	622	Fibrosis	-0.399145	0.000702707	0.0186564	-3.15323	Negative
Metabolism	Carbohydrate metabolism	ENSG00000166816	LDHD	lactate dehydrogenase D [Source:HGNC Symbol;Acc:HGNC:19708]	197257	Fibrosis	-0.361215	0.00177896	0.0240585	-2.74983	Negative
Metabolism	Carbohydrate metabolism	ENSG00000168237	GLYCTK	glycerate kinase [Source:HGNC Symbol;Acc:HGNC:24247]	132158	Fibrosis	-0.414129	0.000393854	0.0146392	-3.40466	Negative
Metabolism	Carbohydrate metabolism	ENSG00000169738	DCXR	dicarbonyl and L-xylulose reductase [Source:HGNC Symbol;Acc:HGNC:18985]	51181	Fibrosis	-0.383828	0.00105653	0.0202222	-2.97612	Negative
Metabolism	Carbohydrate metabolism	ENSG00000204099	NEU4	neuraminidase 4 [Source:HGNC Symbol;Acc:HGNC:21328]	129807	Fibrosis	-0.316931	0.00789416	0.0433899	-2.10269	Negative
Metabolism	Carbohydrate metabolism	ENSG00000204370	SDHD	succinate dehydrogenase complex subunit D [Source:HGNC Symbol;Acc:HGNC:10683]	6392	Fibrosis	-0.310607	0.0101823	0.0487633	-1.99215	Negative
Metabolism	Lipid metabolism	ENSG00000060971	ACAA1	acetyl-CoA acyltransferase 1 [Source:HGNC Symbol;Acc:HGNC:82]	30	Fibrosis	-0.345355	0.00280334	0.0279901	-2.55232	Negative
Metabolism	Lipid metabolism	ENSG00000072506	HSD17B10	hydroxysteroid 17-beta dehydrogenase 10 [Source:HGNC Symbol;Acc:HGNC:4800]	3028	Fibrosis	-0.31376	0.00844286	0.0448896	-2.07351	Negative
Metabolism	Lipid metabolism	ENSG00000088766	CRLS1	cardiolipin synthase 1 [Source:HGNC Symbol;Acc:HGNC:16148]	54675	Fibrosis	-0.371819	0.00149473	0.0229027	-2.82544	Negative
Metabolism	Lipid metabolism	ENSG00000100596	SPTLC2	serine palmitoyltransferase long chain base subunit 2 [Source:HGNC Symbol;Acc:HGNC:11278]	9517	Fibrosis	0.352725	0.003263	0.0296955	2.48638	Positive
Metabolism	Lipid metabolism	ENSG00000103150	MLYCD	malonyl-CoA decarboxylase [Source:HGNC Symbol;Acc:HGNC:7150]	23417	Fibrosis	-0.425717	0.000298456	0.013164	-3.52512	Negative
Metabolism	Lipid metabolism	ENSG00000104823	ECH1	enoyl-CoA hydratase 1 [Source:HGNC Symbol;Acc:HGNC:3149]	1891	Fibrosis	-0.303162	0.010794	0.0499087	-1.96682	Negative
Metabolism	Lipid metabolism	ENSG00000105379	ETFB	electron transfer flavoprotein subunit beta [Source:HGNC Symbol;Acc:HGNC:3482]	2109	Fibrosis	-0.322079	0.00575275	0.037791	-2.24012	Negative
Metabolism	Lipid metabolism	ENSG00000107537	PHYH	phytanoyl-CoA 2-hydroxylase [Source:HGNC Symbol;Acc:HGNC:8940]	5264	Fibrosis	-0.344599	0.00327514	0.0296955	-2.48477	Negative
Metabolism	Lipid metabolism	ENSG00000112304	ACOT13	acyl-CoA thioesterase 13 [Source:HGNC Symbol;Acc:HGNC:20999]	55856	Fibrosis	-0.429659	0.000324068	0.0134318	-3.48936	Negative
Metabolism	Lipid metabolism	ENSG00000116882	HAO2	hydroxyacid oxidase 2 [Source:HGNC Symbol;Acc:HGNC:4810]	51179	Fibrosis	-0.390472	0.000725521	0.0187438	-3.13935	Negative
Metabolism	Lipid metabolism	ENSG00000117054	ACADM	acyl-CoA dehydrogenase medium chain [Source:HGNC Symbol;Acc:HGNC:89]	34	Fibrosis	-0.353144	0.00260655	0.0277064	-2.58393	Negative
Metabolism	Lipid metabolism	ENSG00000117592	PRDX6	peroxiredoxin 6 [Source:HGNC Symbol;Acc:HGNC:16753]	9588	Fibrosis	-0.33555	0.00468272	0.0341142	-2.3295	Negative
Metabolism	Lipid metabolism	ENSG00000120915	EPHX2	epoxide hydrolase 2 [Source:HGNC Symbol;Acc:HGNC:3402]	2053	Fibrosis	-0.328269	0.00498339	0.0351298	-2.30248	Negative
Metabolism	Lipid metabolism	ENSG00000122971	ACADS	acyl-CoA dehydrogenase short chain [Source:HGNC Symbol;Acc:HGNC:90]	35	Fibrosis	-0.357343	0.00201696	0.0257082	-2.6953	Negative
Metabolism	Lipid metabolism	ENSG00000123130	ACOT9	acyl-CoA thioesterase 9 [Source:HGNC Symbol;Acc:HGNC:17152]	23597	Fibrosis	0.329068	0.00476143	0.0343754	2.32226	Positive
Metabolism	Lipid metabolism	ENSG00000124370	MCEE	methylmalonyl-CoA epimerase [Source:HGNC Symbol;Acc:HGNC:16732]	84693	Fibrosis	-0.398778	0.000718734	0.0186799	-3.14343	Negative
Metabolism	Lipid metabolism	ENSG00000137133	HINT2	histidine triad nucleotide binding protein 2 [Source:HGNC Symbol;Acc:HGNC:18344]	84681	Fibrosis	-0.3875	0.00087613	0.0197984	-3.05743	Negative
Metabolism	Lipid metabolism	ENSG00000138796	HADH	hydroxyacyl-CoA dehydrogenase [Source:HGNC Symbol;Acc:HGNC:4799]	3033	Fibrosis	-0.325374	0.00595787	0.0382509	-2.22491	Negative
Metabolism	Lipid metabolism	ENSG00000146085	MMUT	methylmalonyl-CoA mutase [Source:HGNC Symbol;Acc:HGNC:7526]	4594	Fibrosis	-0.367611	0.00203749	0.0257227	-2.69091	Negative
Metabolism	Lipid metabolism	ENSG00000157379	DHRS1	dehydrogenase/reductase 1 [Source:HGNC Symbol;Acc:HGNC:16445]	115817	Fibrosis	-0.354528	0.00321859	0.029566	-2.49233	Negative
Metabolism	Lipid metabolism	ENSG00000163586	FABP1	fatty acid binding protein 1 [Source:HGNC Symbol;Acc:HGNC:3555]	2168	Fibrosis	-0.32221	0.00537223	0.0364417	-2.26985	Negative
Metabolism	Lipid metabolism	ENSG00000167969	ECI1	enoyl-CoA delta isomerase 1 [Source:HGNC Symbol;Acc:HGNC:2703]	1632	Fibrosis	-0.315924	0.00826751	0.0444732	-2.08263	Negative
Metabolism	Lipid metabolism	ENSG00000171503	ETFDH	electron transfer flavoprotein dehydrogenase [Source:HGNC Symbol;Acc:HGNC:3483]	2110	Fibrosis	-0.322551	0.0064108	0.039778	-2.19309	Negative
Metabolism	Lipid metabolism	ENSG00000183549	ACSM5	acyl-CoA synthetase medium chain family member 5 [Source:HGNC Symbol;Acc:HGNC:26060]	54988	Fibrosis	-0.324737	0.00614406	0.0389408	-2.21154	Negative
Metabolism	Lipid metabolism	ENSG00000183747	ACSM2A	acyl-CoA synthetase medium chain family member 2A [Source:HGNC Symbol;Acc:HGNC:32017]	123876	Fibrosis	-0.349316	0.00220581	0.026754	-2.65643	Negative
Metabolism	Lipid metabolism	ENSG00000196177	ACADSB	acyl-CoA dehydrogenase short/branched chain [Source:HGNC Symbol;Acc:HGNC:91]	36	Fibrosis	-0.37062	0.00172856	0.0235427	-2.76232	Negative
Metabolism	Lipid metabolism	ENSG00000204228	HSD17B8	hydroxysteroid 17-beta dehydrogenase 8 [Source:HGNC Symbol;Acc:HGNC:3554]	7923	Fibrosis	-0.433313	0.000151898	0.0112194	-3.81845	Negative
Metabolism	Lipid metabolism	ENSG00000242110	AMACR	alpha-methylacyl-CoA racemase [Source:HGNC Symbol;Acc:HGNC:451]	23600	Fibrosis	-0.324105	0.00510487	0.0355477	-2.29202	Negative
Metabolism	Nucleotide metabolism	ENSG00000128951	DUT	deoxyuridine triphosphatase [Source:HGNC Symbol;Acc:HGNC:3078]	1854	Fibrosis	-0.331311	0.00598859	0.0382509	-2.22268	Negative
Metabolism	Nucleotide metabolism	ENSG00000148339	SLC25A25	solute carrier family 25 member 25 [Source:HGNC Symbol;Acc:HGNC:20663]	114789	Fibrosis	-0.386421	0.00117683	0.0209259	-2.92929	Negative
Metabolism	Nucleotide metabolism	ENSG00000151729	SLC25A4	solute carrier family 25 member 4 [Source:HGNC Symbol;Acc:HGNC:10990]	291	Fibrosis	-0.434963	0.000127646	0.0107565	-3.89399	Negative
Metabolism	Nucleotide metabolism	ENSG00000189283	FHIT	fragile histidine triad diadenosine triphosphatase [Source:HGNC Symbol;Acc:HGNC:3701]	2272	Fibrosis	-0.460155	0.000110994	0.0105383	-3.9547	Negative
Metabolism	Amino acid metabolism	ENSG00000008311	AASS	aminoadipate-semialdehyde synthase [Source:HGNC Symbol;Acc:HGNC:17366]	10157	Fibrosis	-0.344984	0.00236232	0.0270573	-2.62666	Negative
Metabolism	Amino acid metabolism	ENSG00000053371	AKR7A2	aldo-keto reductase family 7 member A2 [Source:HGNC Symbol;Acc:HGNC:389]	8574	Fibrosis	-0.327431	0.00481128	0.0344938	-2.31774	Negative
Metabolism	Amino acid metabolism	ENSG00000059573	ALDH18A1	aldehyde dehydrogenase 18 family member A1 [Source:HGNC Symbol;Acc:HGNC:9722]	5832	Fibrosis	0.322946	0.00759442	0.0427275	2.11951	Positive
Metabolism	Amino acid metabolism	ENSG00000065154	OAT	ornithine aminotransferase [Source:HGNC Symbol;Acc:HGNC:8091]	4942	Fibrosis	-0.352405	0.00085637	0.0197984	-3.06734	Negative
Metabolism	Amino acid metabolism	ENSG00000069535	MAOB	monoamine oxidase B [Source:HGNC Symbol;Acc:HGNC:6834]	4129	Fibrosis	-0.338388	0.00408383	0.0321539	-2.38893	Negative
Metabolism	Amino acid metabolism	ENSG00000072506	HSD17B10	hydroxysteroid 17-beta dehydrogenase 10 [Source:HGNC Symbol;Acc:HGNC:4800]	3028	Fibrosis	-0.31376	0.00844286	0.0448896	-2.07351	Negative
Metabolism	Amino acid metabolism	ENSG00000083123	BCKDHB	branched chain keto acid dehydrogenase E1 subunit beta [Source:HGNC Symbol;Acc:HGNC:987]	594	Fibrosis	-0.318589	0.00726182	0.0416629	-2.13895	Negative
Metabolism	Amino acid metabolism	ENSG00000100116	GCAT	glycine C-acetyltransferase [Source:HGNC Symbol;Acc:HGNC:4188]	23464	Fibrosis	-0.377542	0.00102434	0.0201831	-2.98955	Negative
Metabolism	Amino acid metabolism	ENSG00000102743	SLC25A15	solute carrier family 25 member 15 [Source:HGNC Symbol;Acc:HGNC:10985]	10166	Fibrosis	-0.318107	0.00806085	0.0438943	-2.09362	Negative
Metabolism	Amino acid metabolism	ENSG00000105379	ETFB	electron transfer flavoprotein subunit beta [Source:HGNC Symbol;Acc:HGNC:3482]	2109	Fibrosis	-0.322079	0.00575275	0.037791	-2.24012	Negative
Metabolism	Amino acid metabolism	ENSG00000105607	GCDH	glutaryl-CoA dehydrogenase [Source:HGNC Symbol;Acc:HGNC:4189]	2639	Fibrosis	-0.363851	0.00247758	0.027397	-2.60597	Negative
Metabolism	Amino acid metabolism	ENSG00000106049	HIBADH	3-hydroxyisobutyrate dehydrogenase [Source:HGNC Symbol;Acc:HGNC:4907]	11112	Fibrosis	-0.384241	0.00105651	0.0202222	-2.97613	Negative
Metabolism	Amino acid metabolism	ENSG00000107819	SFXN3	sideroflexin 3 [Source:HGNC Symbol;Acc:HGNC:16087]	81855	Fibrosis	0.385623	0.00109075	0.0206239	2.96227	Positive
Metabolism	Amino acid metabolism	ENSG00000109576	AADAT	aminoadipate aminotransferase [Source:HGNC Symbol;Acc:HGNC:17929]	51166	Fibrosis	-0.37668	0.00116236	0.0209259	-2.93466	Negative
Metabolism	Amino acid metabolism	ENSG00000112294	ALDH5A1	aldehyde dehydrogenase 5 family member A1 [Source:HGNC Symbol;Acc:HGNC:408]	7915	Fibrosis	-0.317662	0.00767918	0.0430281	-2.11468	Negative
Metabolism	Amino acid metabolism	ENSG00000119689	DLST	dihydrolipoamide S-succinyltransferase [Source:HGNC Symbol;Acc:HGNC:2911]	1743	Fibrosis	0.318956	0.00907237	0.0463366	2.04228	Positive
Metabolism	Amino acid metabolism	ENSG00000123453	SARDH	sarcosine dehydrogenase [Source:HGNC Symbol;Acc:HGNC:10536]	1757	Fibrosis	-0.368615	0.0013552	0.0220697	-2.868	Negative
Metabolism	Amino acid metabolism	ENSG00000128928	IVD	isovaleryl-CoA dehydrogenase [Source:HGNC Symbol;Acc:HGNC:6186]	3712	Fibrosis	-0.311088	0.00808804	0.0439861	-2.09216	Negative
Metabolism	Amino acid metabolism	ENSG00000132837	DMGDH	dimethylglycine dehydrogenase [Source:HGNC Symbol;Acc:HGNC:24475]	29958	Fibrosis	-0.306541	0.0104832	0.0493027	-1.97951	Negative
Metabolism	Amino acid metabolism	ENSG00000137106	GRHPR	glyoxylate and hydroxypyruvate reductase [Source:HGNC Symbol;Acc:HGNC:4570]	9380	Fibrosis	-0.3759	0.0014212	0.022371	-2.84735	Negative
Metabolism	Amino acid metabolism	ENSG00000138796	HADH	hydroxyacyl-CoA dehydrogenase [Source:HGNC Symbol;Acc:HGNC:4799]	3033	Fibrosis	-0.325374	0.00595787	0.0382509	-2.22491	Negative
Metabolism	Amino acid metabolism	ENSG00000147576	ADHFE1	alcohol dehydrogenase iron containing 1 [Source:HGNC Symbol;Acc:HGNC:16354]	137872	Fibrosis	-0.396737	0.00068739	0.0186564	-3.1628	Negative
Metabolism	Amino acid metabolism	ENSG00000149124	GLYAT	glycine-N-acyltransferase [Source:HGNC Symbol;Acc:HGNC:13734]	10249	Fibrosis	-0.401853	0.00065268	0.0186564	-3.1853	Negative
Metabolism	Amino acid metabolism	ENSG00000164904	ALDH7A1	aldehyde dehydrogenase 7 family member A1 [Source:HGNC Symbol;Acc:HGNC:877]	501	Fibrosis	-0.336237	0.00481376	0.0344938	-2.31752	Negative
Metabolism	Amino acid metabolism	ENSG00000171503	ETFDH	electron transfer flavoprotein dehydrogenase [Source:HGNC Symbol;Acc:HGNC:3483]	2110	Fibrosis	-0.322551	0.0064108	0.039778	-2.19309	Negative
Metabolism	Amino acid metabolism	ENSG00000172482	AGXT	alanine--glyoxylate aminotransferase [Source:HGNC Symbol;Acc:HGNC:341]	189	Fibrosis	-0.356188	0.00228387	0.0268252	-2.64133	Negative
Metabolism	Amino acid metabolism	ENSG00000174990	CA5A	carbonic anhydrase 5A [Source:HGNC Symbol;Acc:HGNC:1377]	763	Fibrosis	-0.31259	0.00902263	0.0461825	-2.04467	Negative
Metabolism	Amino acid metabolism	ENSG00000175600	SUGCT	succinyl-CoA:glutarate-CoA transferase [Source:HGNC Symbol;Acc:HGNC:16001]	79783	Fibrosis	-0.342608	0.00389003	0.0314985	-2.41005	Negative
Metabolism	Amino acid metabolism	ENSG00000189221	MAOA	monoamine oxidase A [Source:HGNC Symbol;Acc:HGNC:6833]	4128	Fibrosis	-0.406441	0.00057898	0.017283	-3.23734	Negative
Metabolism	Amino acid metabolism	ENSG00000196177	ACADSB	acyl-CoA dehydrogenase short/branched chain [Source:HGNC Symbol;Acc:HGNC:91]	36	Fibrosis	-0.37062	0.00172856	0.0235427	-2.76232	Negative
Metabolism	Amino acid metabolism	ENSG00000241935	HOGA1	4-hydroxy-2-oxoglutarate aldolase 1 [Source:HGNC Symbol;Acc:HGNC:25155]	112817	Fibrosis	-0.506764	1.62168e-05	0.00961665	-4.79004	Negative
Metabolism	Amino acid metabolism	ENSG00000250799	PRODH2	proline dehydrogenase 2 [Source:HGNC Symbol;Acc:HGNC:17325]	58510	Fibrosis	-0.378142	0.000968735	0.020059	-3.0138	Negative
Metabolism	Electron carriers	ENSG00000105379	ETFB	electron transfer flavoprotein subunit beta [Source:HGNC Symbol;Acc:HGNC:3482]	2109	Fibrosis	-0.322079	0.00575275	0.037791	-2.24012	Negative
Metabolism	Electron carriers	ENSG00000171503	ETFDH	electron transfer flavoprotein dehydrogenase [Source:HGNC Symbol;Acc:HGNC:3483]	2110	Fibrosis	-0.322551	0.0064108	0.039778	-2.19309	Negative
Metabolism	Electron carriers	ENSG00000205707	ETFRF1	electron transfer flavoprotein regulatory factor 1 [Source:HGNC Symbol;Acc:HGNC:27052]	144363	Fibrosis	-0.428617	0.000243858	0.0128431	-3.61286	Negative
Metabolism	Electron carriers	ENSG00000250799	PRODH2	proline dehydrogenase 2 [Source:HGNC Symbol;Acc:HGNC:17325]	58510	Fibrosis	-0.378142	0.000968735	0.020059	-3.0138	Negative
Metabolism	Vitamin metabolism	ENSG00000100348	TXN2	thioredoxin 2 [Source:HGNC Symbol;Acc:HGNC:17772]	25828	Fibrosis	-0.376974	0.00130082	0.0215973	-2.88578	Negative
Metabolism	Vitamin metabolism	ENSG00000105379	ETFB	electron transfer flavoprotein subunit beta [Source:HGNC Symbol;Acc:HGNC:3482]	2109	Fibrosis	-0.322079	0.00575275	0.037791	-2.24012	Negative
Metabolism	Vitamin metabolism	ENSG00000107819	SFXN3	sideroflexin 3 [Source:HGNC Symbol;Acc:HGNC:16087]	81855	Fibrosis	0.385623	0.00109075	0.0206239	2.96227	Positive
Metabolism	Vitamin metabolism	ENSG00000123453	SARDH	sarcosine dehydrogenase [Source:HGNC Symbol;Acc:HGNC:10536]	1757	Fibrosis	-0.368615	0.0013552	0.0220697	-2.868	Negative
Metabolism	Vitamin metabolism	ENSG00000132837	DMGDH	dimethylglycine dehydrogenase [Source:HGNC Symbol;Acc:HGNC:24475]	29958	Fibrosis	-0.306541	0.0104832	0.0493027	-1.97951	Negative
Metabolism	Vitamin metabolism	ENSG00000139428	MMAB	metabolism of cobalamin associated B [Source:HGNC Symbol;Acc:HGNC:19331]	326625	Fibrosis	-0.332304	0.00590841	0.0382037	-2.22853	Negative
Metabolism	Vitamin metabolism	ENSG00000144908	ALDH1L1	aldehyde dehydrogenase 1 family member L1 [Source:HGNC Symbol;Acc:HGNC:3978]	10840	Fibrosis	-0.384592	0.000958045	0.020059	-3.01861	Negative
Metabolism	Vitamin metabolism	ENSG00000146085	MMUT	methylmalonyl-CoA mutase [Source:HGNC Symbol;Acc:HGNC:7526]	4594	Fibrosis	-0.367611	0.00203749	0.0257227	-2.69091	Negative
Metabolism	Vitamin metabolism	ENSG00000151552	QDPR	quinoid dihydropteridine reductase [Source:HGNC Symbol;Acc:HGNC:9752]	5860	Fibrosis	-0.311567	0.00851359	0.0449466	-2.06989	Negative
Metabolism	Vitamin metabolism	ENSG00000157326	DHRS4	dehydrogenase/reductase 4 [Source:HGNC Symbol;Acc:HGNC:16985]	10901	Fibrosis	-0.390957	0.000975316	0.0200678	-3.01085	Negative
Metabolism	Vitamin metabolism	ENSG00000164904	ALDH7A1	aldehyde dehydrogenase 7 family member A1 [Source:HGNC Symbol;Acc:HGNC:877]	501	Fibrosis	-0.336237	0.00481376	0.0344938	-2.31752	Negative
Metabolism	Vitamin metabolism	ENSG00000171503	ETFDH	electron transfer flavoprotein dehydrogenase [Source:HGNC Symbol;Acc:HGNC:3483]	2110	Fibrosis	-0.322551	0.0064108	0.039778	-2.19309	Negative
Metabolism	Vitamin metabolism	ENSG00000198074	AKR1B10	aldo-keto reductase family 1 member B10 [Source:HGNC Symbol;Acc:HGNC:382]	57016	Fibrosis	0.320051	0.00568329	0.0376142	2.2454	Positive
Metabolism	Metals and cofactors	ENSG00000004961	HCCS	holocytochrome c synthase [Source:HGNC Symbol;Acc:HGNC:4837]	3052	Fibrosis	0.35162	0.00334699	0.0296955	2.47535	Positive
Metabolism	Metals and cofactors	ENSG00000065057	NTHL1	nth like DNA glycosylase 1 [Source:HGNC Symbol;Acc:HGNC:8028]	4913	Fibrosis	-0.38273	0.000737356	0.0187967	-3.13232	Negative
Metabolism	Metals and cofactors	ENSG00000110871	COQ5	coenzyme Q5, methyltransferase [Source:HGNC Symbol;Acc:HGNC:28722]	84274	Fibrosis	-0.341257	0.00458656	0.0338771	-2.33851	Negative
Metabolism	Metals and cofactors	ENSG00000115286	NDUFS7	NADH:ubiquinone oxidoreductase core subunit S7 [Source:HGNC Symbol;Acc:HGNC:7714]	374291	Fibrosis	-0.413348	0.000467873	0.016238	-3.32987	Negative
Metabolism	Metals and cofactors	ENSG00000117791	MTARC2	mitochondrial amidoxime reducing component 2 [Source:HGNC Symbol;Acc:HGNC:26064]	54996	Fibrosis	-0.341339	0.00358748	0.0304282	-2.44521	Negative
Metabolism	Metals and cofactors	ENSG00000124523	SIRT5	sirtuin 5 [Source:HGNC Symbol;Acc:HGNC:14933]	23408	Fibrosis	-0.342762	0.00391687	0.0316048	-2.40706	Negative
Metabolism	Metals and cofactors	ENSG00000132570	PCBD2	pterin-4 alpha-carbinolamine dehydratase 2 [Source:HGNC Symbol;Acc:HGNC:24474]	84105	Fibrosis	-0.379546	0.00150729	0.022973	-2.8218	Negative
Metabolism	Metals and cofactors	ENSG00000151552	QDPR	quinoid dihydropteridine reductase [Source:HGNC Symbol;Acc:HGNC:9752]	5860	Fibrosis	-0.311567	0.00851359	0.0449466	-2.06989	Negative
Metabolism	Metals and cofactors	ENSG00000152620	NADK2	NAD kinase 2, mitochondrial [Source:HGNC Symbol;Acc:HGNC:26404]	133686	Fibrosis	-0.340077	0.00349103	0.0301642	-2.45705	Negative
Metabolism	Metals and cofactors	ENSG00000163586	FABP1	fatty acid binding protein 1 [Source:HGNC Symbol;Acc:HGNC:3555]	2168	Fibrosis	-0.32221	0.00537223	0.0364417	-2.26985	Negative
Metabolism	Metals and cofactors	ENSG00000164284	GRPEL2	GrpE like 2, mitochondrial [Source:HGNC Symbol;Acc:HGNC:21060]	134266	Fibrosis	0.314957	0.00840977	0.04482	2.07522	Positive
Metabolism	Metals and cofactors	ENSG00000169599	NFU1	NFU1 iron-sulfur cluster scaffold [Source:HGNC Symbol;Acc:HGNC:16287]	27247	Fibrosis	-0.331019	0.00617265	0.039079	-2.20953	Negative
Metabolism	Metals and cofactors	ENSG00000171503	ETFDH	electron transfer flavoprotein dehydrogenase [Source:HGNC Symbol;Acc:HGNC:3483]	2110	Fibrosis	-0.322551	0.0064108	0.039778	-2.19309	Negative
Metabolism	Metals and cofactors	ENSG00000178096	BOLA1	bolA family member 1 [Source:HGNC Symbol;Acc:HGNC:24263]	51027	Fibrosis	-0.372322	0.00161644	0.0233045	-2.79144	Negative
Metabolism	Metals and cofactors	ENSG00000182512	GLRX5	glutaredoxin 5 [Source:HGNC Symbol;Acc:HGNC:20134]	51218	Fibrosis	-0.380905	0.00133984	0.0220545	-2.87295	Negative
Metabolism	Metals and cofactors	ENSG00000186205	MTARC1	mitochondrial amidoxime reducing component 1 [Source:HGNC Symbol;Acc:HGNC:26189]	64757	Fibrosis	-0.326708	0.00647877	0.0399009	-2.18851	Negative
Metabolism	Metals and cofactors	ENSG00000204370	SDHD	succinate dehydrogenase complex subunit D [Source:HGNC Symbol;Acc:HGNC:10683]	6392	Fibrosis	-0.310607	0.0101823	0.0487633	-1.99215	Negative
Metabolism	Metals and cofactors	ENSG00000240230	COX19	cytochrome c oxidase assembly factor COX19 [Source:HGNC Symbol;Acc:HGNC:28074]	90639	Fibrosis	0.311448	0.00947445	0.047259	2.02345	Positive
Metabolism	Metals and cofactors	ENSG00000277972	CISD3	CDGSH iron sulfur domain 3 [Source:HGNC Symbol;Acc:HGNC:27578]	284106	Fibrosis	-0.374891	0.00176279	0.0239523	-2.7538	Negative
Metabolism	Detoxification	ENSG00000053371	AKR7A2	aldo-keto reductase family 7 member A2 [Source:HGNC Symbol;Acc:HGNC:389]	8574	Fibrosis	-0.327431	0.00481128	0.0344938	-2.31774	Negative
Metabolism	Detoxification	ENSG00000063854	HAGH	hydroxyacylglutathione hydrolase [Source:HGNC Symbol;Acc:HGNC:4805]	3029	Fibrosis	-0.365377	0.00154854	0.0232108	-2.81008	Negative
Metabolism	Detoxification	ENSG00000069535	MAOB	monoamine oxidase B [Source:HGNC Symbol;Acc:HGNC:6834]	4129	Fibrosis	-0.338388	0.00408383	0.0321539	-2.38893	Negative
Metabolism	Detoxification	ENSG00000100348	TXN2	thioredoxin 2 [Source:HGNC Symbol;Acc:HGNC:17772]	25828	Fibrosis	-0.376974	0.00130082	0.0215973	-2.88578	Negative
Metabolism	Detoxification	ENSG00000100577	GSTZ1	glutathione S-transferase zeta 1 [Source:HGNC Symbol;Acc:HGNC:4643]	2954	Fibrosis	-0.403495	0.000680851	0.0186564	-3.16695	Negative
Metabolism	Detoxification	ENSG00000117592	PRDX6	peroxiredoxin 6 [Source:HGNC Symbol;Acc:HGNC:16753]	9588	Fibrosis	-0.33555	0.00468272	0.0341142	-2.3295	Negative
Metabolism	Detoxification	ENSG00000117791	MTARC2	mitochondrial amidoxime reducing component 2 [Source:HGNC Symbol;Acc:HGNC:26064]	54996	Fibrosis	-0.341339	0.00358748	0.0304282	-2.44521	Negative
Metabolism	Detoxification	ENSG00000120915	EPHX2	epoxide hydrolase 2 [Source:HGNC Symbol;Acc:HGNC:3402]	2053	Fibrosis	-0.328269	0.00498339	0.0351298	-2.30248	Negative
Metabolism	Detoxification	ENSG00000128309	MPST	mercaptopyruvate sulfurtransferase [Source:HGNC Symbol;Acc:HGNC:7223]	4357	Fibrosis	-0.394677	0.000718019	0.0186799	-3.14386	Negative
Metabolism	Detoxification	ENSG00000128311	TST	thiosulfate sulfurtransferase [Source:HGNC Symbol;Acc:HGNC:12388]	7263	Fibrosis	-0.333639	0.00415879	0.0322133	-2.38103	Negative
Metabolism	Detoxification	ENSG00000142168	SOD1	superoxide dismutase 1 [Source:HGNC Symbol;Acc:HGNC:11179]	6647	Fibrosis	-0.424979	0.000323694	0.0134318	-3.48987	Negative
Metabolism	Detoxification	ENSG00000144827	ABHD10	abhydrolase domain containing 10, depalmitoylase [Source:HGNC Symbol;Acc:HGNC:25656]	55347	Fibrosis	-0.328899	0.00576714	0.037802	-2.23904	Negative
Metabolism	Detoxification	ENSG00000148450	MSRB2	methionine sulfoxide reductase B2 [Source:HGNC Symbol;Acc:HGNC:17061]	22921	Fibrosis	-0.325228	0.00682043	0.0403661	-2.16619	Negative
Metabolism	Detoxification	ENSG00000149124	GLYAT	glycine-N-acyltransferase [Source:HGNC Symbol;Acc:HGNC:13734]	10249	Fibrosis	-0.401853	0.00065268	0.0186564	-3.1853	Negative
Metabolism	Detoxification	ENSG00000164904	ALDH7A1	aldehyde dehydrogenase 7 family member A1 [Source:HGNC Symbol;Acc:HGNC:877]	501	Fibrosis	-0.336237	0.00481376	0.0344938	-2.31752	Negative
Metabolism	Detoxification	ENSG00000167468	GPX4	glutathione peroxidase 4 [Source:HGNC Symbol;Acc:HGNC:4556]	2879	Fibrosis	-0.324788	0.00743571	0.0422992	-2.12868	Negative
Metabolism	Detoxification	ENSG00000183549	ACSM5	acyl-CoA synthetase medium chain family member 5 [Source:HGNC Symbol;Acc:HGNC:26060]	54988	Fibrosis	-0.324737	0.00614406	0.0389408	-2.21154	Negative
Metabolism	Detoxification	ENSG00000183747	ACSM2A	acyl-CoA synthetase medium chain family member 2A [Source:HGNC Symbol;Acc:HGNC:32017]	123876	Fibrosis	-0.349316	0.00220581	0.026754	-2.65643	Negative
Metabolism	Detoxification	ENSG00000184470	TXNRD2	thioredoxin reductase 2 [Source:HGNC Symbol;Acc:HGNC:18155]	10587	Fibrosis	-0.345298	0.00346841	0.0301642	-2.45987	Negative
Metabolism	Detoxification	ENSG00000186205	MTARC1	mitochondrial amidoxime reducing component 1 [Source:HGNC Symbol;Acc:HGNC:26189]	64757	Fibrosis	-0.326708	0.00647877	0.0399009	-2.18851	Negative
Metabolism	Detoxification	ENSG00000189221	MAOA	monoamine oxidase A [Source:HGNC Symbol;Acc:HGNC:6833]	4128	Fibrosis	-0.406441	0.00057898	0.017283	-3.23734	Negative
Metabolism	Detoxification	ENSG00000198074	AKR1B10	aldo-keto reductase family 1 member B10 [Source:HGNC Symbol;Acc:HGNC:382]	57016	Fibrosis	0.320051	0.00568329	0.0376142	2.2454	Positive
Metabolism	Sulfur metabolism	ENSG00000128309	MPST	mercaptopyruvate sulfurtransferase [Source:HGNC Symbol;Acc:HGNC:7223]	4357	Fibrosis	-0.394677	0.000718019	0.0186799	-3.14386	Negative
Metabolism	Sulfur metabolism	ENSG00000128311	TST	thiosulfate sulfurtransferase [Source:HGNC Symbol;Acc:HGNC:12388]	7263	Fibrosis	-0.333639	0.00415879	0.0322133	-2.38103	Negative
Metabolism	Sulfur metabolism	ENSG00000148450	MSRB2	methionine sulfoxide reductase B2 [Source:HGNC Symbol;Acc:HGNC:17061]	22921	Fibrosis	-0.325228	0.00682043	0.0403661	-2.16619	Negative
Metabolism	Sulfur metabolism	ENSG00000215845	TSTD1	thiosulfate sulfurtransferase like domain containing 1 [Source:HGNC Symbol;Acc:HGNC:35410]	100131187	Fibrosis	-0.33959	0.00368355	0.030664	-2.43373	Negative
Others	Mitochondrial central dogma	ENSG00000072506	HSD17B10	hydroxysteroid 17-beta dehydrogenase 10 [Source:HGNC Symbol;Acc:HGNC:4800]	3028	Fibrosis	-0.31376	0.00844286	0.0448896	-2.07351	Negative
Others	Mitochondrial central dogma	ENSG00000090263	MRPS33	mitochondrial ribosomal protein S33 [Source:HGNC Symbol;Acc:HGNC:16634]	51650	Fibrosis	-0.33782	0.00466064	0.0341142	-2.33155	Negative
Others	Mitochondrial central dogma	ENSG00000114735	HEMK1	HemK methyltransferase family member 1 [Source:HGNC Symbol;Acc:HGNC:24923]	51409	Fibrosis	-0.370566	0.00229664	0.0268252	-2.63891	Negative
Others	Mitochondrial central dogma	ENSG00000120832	MTERF2	mitochondrial transcription termination factor 2 [Source:HGNC Symbol;Acc:HGNC:30779]	80298	Fibrosis	-0.312903	0.00733335	0.0419136	-2.1347	Negative
Others	Mitochondrial central dogma	ENSG00000125901	MRPS26	mitochondrial ribosomal protein S26 [Source:HGNC Symbol;Acc:HGNC:14045]	64949	Fibrosis	-0.314264	0.00798495	0.043646	-2.09773	Negative
Others	Mitochondrial central dogma	ENSG00000128694	OSGEPL1	O-sialoglycoprotein endopeptidase like 1 [Source:HGNC Symbol;Acc:HGNC:23075]	64172	Fibrosis	-0.332578	0.00406526	0.032139	-2.39091	Negative
Others	Mitochondrial central dogma	ENSG00000132463	GRSF1	G-rich RNA sequence binding factor 1 [Source:HGNC Symbol;Acc:HGNC:4610]	2926	Fibrosis	0.391248	0.00113111	0.0206875	2.9465	Positive
Others	Mitochondrial central dogma	ENSG00000143314	MRPL24	mitochondrial ribosomal protein L24 [Source:HGNC Symbol;Acc:HGNC:14037]	79590	Fibrosis	-0.381894	0.00123241	0.0212416	-2.90924	Negative
Others	Mitochondrial central dogma	ENSG00000166902	MRPL16	mitochondrial ribosomal protein L16 [Source:HGNC Symbol;Acc:HGNC:14476]	54948	Fibrosis	-0.308254	0.00950637	0.0473321	-2.02199	Negative
Others	Mitochondrial central dogma	ENSG00000172878	METAP1D	methionyl aminopeptidase type 1D, mitochondrial [Source:HGNC Symbol;Acc:HGNC:32583]	254042	Fibrosis	-0.30777	0.0107237	0.0496881	-1.96965	Negative
Others	Mitochondrial central dogma	ENSG00000173141	MRPL57	mitochondrial ribosomal protein L57 [Source:HGNC Symbol;Acc:HGNC:14514]	78988	Fibrosis	-0.409943	0.000520819	0.0169176	-3.28331	Negative
Others	Mitochondrial central dogma	ENSG00000174547	MRPL11	mitochondrial ribosomal protein L11 [Source:HGNC Symbol;Acc:HGNC:14042]	65003	Fibrosis	-0.321734	0.00770761	0.0430281	-2.11308	Negative
Others	Mitochondrial central dogma	ENSG00000178449	COX14	cytochrome c oxidase assembly factor COX14 [Source:HGNC Symbol;Acc:HGNC:28216]	84987	Fibrosis	-0.394836	0.00070101	0.0186564	-3.15428	Negative
Others	Mitochondrial central dogma	ENSG00000183617	MRPL54	mitochondrial ribosomal protein L54 [Source:HGNC Symbol;Acc:HGNC:16685]	116541	Fibrosis	-0.366081	0.00207614	0.0257227	-2.68274	Negative
Others	Mitochondrial central dogma	ENSG00000204822	MRPL53	mitochondrial ribosomal protein L53 [Source:HGNC Symbol;Acc:HGNC:16684]	116540	Fibrosis	-0.427439	0.00021644	0.0124695	-3.66466	Negative
Others	Mitochondrial central dogma	ENSG00000243927	MRPS6	mitochondrial ribosomal protein S6 [Source:HGNC Symbol;Acc:HGNC:14051]	64968	Fibrosis	0.30133	0.00980803	0.0479142	2.00842	Positive
Others	Mitochondrial central dogma	ENSG00000262814	MRPL12	mitochondrial ribosomal protein L12 [Source:HGNC Symbol;Acc:HGNC:10378]	6182	Fibrosis	-0.381267	0.00112933	0.0206875	-2.94718	Negative
Others	OXPHOS	ENSG00000004961	HCCS	holocytochrome c synthase [Source:HGNC Symbol;Acc:HGNC:4837]	3052	Fibrosis	0.35162	0.00334699	0.0296955	2.47535	Positive
Others	OXPHOS	ENSG00000090266	NDUFB2	NADH:ubiquinone oxidoreductase subunit B2 [Source:HGNC Symbol;Acc:HGNC:7697]	4708	Fibrosis	-0.306657	0.00892751	0.0460458	-2.04927	Negative
Others	OXPHOS	ENSG00000099624	ATP5F1D	ATP synthase F1 subunit delta [Source:HGNC Symbol;Acc:HGNC:837]	513	Fibrosis	-0.332666	0.00449315	0.0335532	-2.34745	Negative
Others	OXPHOS	ENSG00000099795	NDUFB7	NADH:ubiquinone oxidoreductase subunit B7 [Source:HGNC Symbol;Acc:HGNC:7702]	4713	Fibrosis	-0.359652	0.00184982	0.024414	-2.73287	Negative
Others	OXPHOS	ENSG00000115286	NDUFS7	NADH:ubiquinone oxidoreductase core subunit S7 [Source:HGNC Symbol;Acc:HGNC:7714]	374291	Fibrosis	-0.413348	0.000467873	0.016238	-3.32987	Negative
Others	OXPHOS	ENSG00000123472	ATPAF1	ATP synthase mitochondrial F1 complex assembly factor 1 [Source:HGNC Symbol;Acc:HGNC:18803]	64756	Fibrosis	-0.340877	0.00427995	0.0326981	-2.36856	Negative
Others	OXPHOS	ENSG00000125356	NDUFA1	NADH:ubiquinone oxidoreductase subunit A1 [Source:HGNC Symbol;Acc:HGNC:7683]	4694	Fibrosis	-0.318103	0.00635487	0.0396686	-2.19689	Negative
Others	OXPHOS	ENSG00000127184	COX7C	cytochrome c oxidase subunit 7C [Source:HGNC Symbol;Acc:HGNC:2292]	1350	Fibrosis	-0.376242	0.00168407	0.0234354	-2.77364	Negative
Others	OXPHOS	ENSG00000130159	ECSIT	ECSIT signaling integrator [Source:HGNC Symbol;Acc:HGNC:29548]	51295	Fibrosis	-0.390495	0.000834367	0.0197984	-3.07864	Negative
Others	OXPHOS	ENSG00000130770	ATP5IF1	ATP synthase inhibitory factor subunit 1 [Source:HGNC Symbol;Acc:HGNC:871]	93974	Fibrosis	-0.345629	0.00293654	0.0285777	-2.53216	Negative
Others	OXPHOS	ENSG00000131495	NDUFA2	NADH:ubiquinone oxidoreductase subunit A2 [Source:HGNC Symbol;Acc:HGNC:7685]	4695	Fibrosis	-0.341062	0.00450865	0.0335598	-2.34595	Negative
Others	OXPHOS	ENSG00000135390	ATP5MC2	ATP synthase membrane subunit c locus 2 [Source:HGNC Symbol;Acc:HGNC:842]	517	Fibrosis	-0.386935	0.0013007	0.0215973	-2.88582	Negative
Others	OXPHOS	ENSG00000135940	COX5B	cytochrome c oxidase subunit 5B [Source:HGNC Symbol;Acc:HGNC:2269]	1329	Fibrosis	-0.371194	0.00160587	0.0233045	-2.79429	Negative
Others	OXPHOS	ENSG00000136521	NDUFB5	NADH:ubiquinone oxidoreductase subunit B5 [Source:HGNC Symbol;Acc:HGNC:7700]	4711	Fibrosis	-0.33295	0.00568666	0.0376142	-2.24514	Negative
Others	OXPHOS	ENSG00000146066	HIGD2A	HIG1 hypoxia inducible domain family member 2A [Source:HGNC Symbol;Acc:HGNC:28311]	192286	Fibrosis	-0.382437	0.00117526	0.0209259	-2.92986	Negative
Others	OXPHOS	ENSG00000154079	SDHAF4	succinate dehydrogenase complex assembly factor 4 [Source:HGNC Symbol;Acc:HGNC:20957]	135154	Fibrosis	-0.327438	0.00597975	0.0382509	-2.22332	Negative
Others	OXPHOS	ENSG00000154723	ATP5PF	ATP synthase peripheral stalk subunit F6 [Source:HGNC Symbol;Acc:HGNC:847]	522	Fibrosis	-0.380427	0.00126909	0.0214413	-2.89651	Negative
Others	OXPHOS	ENSG00000156885	COX6A2	cytochrome c oxidase subunit 6A2 [Source:HGNC Symbol;Acc:HGNC:2279]	1339	Fibrosis	-0.430122	0.000245474	0.0128431	-3.61	Negative
Others	OXPHOS	ENSG00000164258	NDUFS4	NADH:ubiquinone oxidoreductase subunit S4 [Source:HGNC Symbol;Acc:HGNC:7711]	4724	Fibrosis	-0.413784	0.000418908	0.0154706	-3.37788	Negative
Others	OXPHOS	ENSG00000164405	UQCRQ	ubiquinol-cytochrome c reductase complex III subunit VII [Source:HGNC Symbol;Acc:HGNC:29594]	27089	Fibrosis	-0.336287	0.00565072	0.0375923	-2.2479	Negative
Others	OXPHOS	ENSG00000164898	FMC1	formation of mitochondrial complex V assembly factor 1 homolog [Source:HGNC Symbol;Acc:HGNC:26946]	154791	Fibrosis	-0.471828	3.83918e-05	0.00961665	-4.41576	Negative
Others	OXPHOS	ENSG00000167863	ATP5PD	ATP synthase peripheral stalk subunit d [Source:HGNC Symbol;Acc:HGNC:845]	10476	Fibrosis	-0.342895	0.00386423	0.0314	-2.41294	Negative
Others	OXPHOS	ENSG00000168653	NDUFS5	NADH:ubiquinone oxidoreductase subunit S5 [Source:HGNC Symbol;Acc:HGNC:7712]	4725	Fibrosis	-0.34975	0.00382506	0.0313359	-2.41736	Negative
Others	OXPHOS	ENSG00000169020	ATP5ME	ATP synthase membrane subunit e [Source:HGNC Symbol;Acc:HGNC:846]	521	Fibrosis	-0.364743	0.00244239	0.0271742	-2.61218	Negative
Others	OXPHOS	ENSG00000171202	TMEM126A	transmembrane protein 126A [Source:HGNC Symbol;Acc:HGNC:25382]	84233	Fibrosis	-0.440641	0.00020377	0.0123267	-3.69086	Negative
Others	OXPHOS	ENSG00000174886	NDUFA11	NADH:ubiquinone oxidoreductase subunit A11 [Source:HGNC Symbol;Acc:HGNC:20371]	126328	Fibrosis	-0.406959	0.000519764	0.0169176	-3.28419	Negative
Others	OXPHOS	ENSG00000178449	COX14	cytochrome c oxidase assembly factor COX14 [Source:HGNC Symbol;Acc:HGNC:28216]	84987	Fibrosis	-0.394836	0.00070101	0.0186564	-3.15428	Negative
Others	OXPHOS	ENSG00000187118	CMC1	C-X9-C motif containing 1 [Source:HGNC Symbol;Acc:HGNC:28783]	152100	Fibrosis	-0.321366	0.00577429	0.037802	-2.2385	Negative
Others	OXPHOS	ENSG00000189043	NDUFA4	NDUFA4 mitochondrial complex associated [Source:HGNC Symbol;Acc:HGNC:7687]	4697	Fibrosis	-0.365982	0.00240414	0.0271052	-2.61904	Negative
Others	OXPHOS	ENSG00000196636	SDHAF3	succinate dehydrogenase complex assembly factor 3 [Source:HGNC Symbol;Acc:HGNC:21752]	57001	Fibrosis	-0.360671	0.00240414	0.0271052	-2.61904	Negative
Others	OXPHOS	ENSG00000204370	SDHD	succinate dehydrogenase complex subunit D [Source:HGNC Symbol;Acc:HGNC:10683]	6392	Fibrosis	-0.310607	0.0101823	0.0487633	-1.99215	Negative
Others	OXPHOS	ENSG00000232838	PET117	PET117 cytochrome c oxidase chaperone [Source:HGNC Symbol;Acc:HGNC:40045]	100303755	Fibrosis	-0.384311	0.00136532	0.0220697	-2.86477	Negative
Others	OXPHOS	ENSG00000240230	COX19	cytochrome c oxidase assembly factor COX19 [Source:HGNC Symbol;Acc:HGNC:28074]	90639	Fibrosis	0.311448	0.00947445	0.047259	2.02345	Positive
Others	OXPHOS	ENSG00000250317	SMIM20	small integral membrane protein 20 [Source:HGNC Symbol;Acc:HGNC:37260]	389203	Fibrosis	-0.312634	0.0103151	0.0489115	-1.98653	Negative
Others	Mitochondrial dynamics and surveillance	ENSG00000030110	BAK1	BCL2 antagonist/killer 1 [Source:HGNC Symbol;Acc:HGNC:949]	578	Fibrosis	0.318427	0.00825772	0.044462	2.08314	Positive
Others	Mitochondrial dynamics and surveillance	ENSG00000159685	CHCHD6	coiled-coil-helix-coiled-coil-helix domain containing 6 [Source:HGNC Symbol;Acc:HGNC:28184]	84303	Fibrosis	-0.353098	0.00346232	0.0301642	-2.46063	Negative
Others	Mitochondrial dynamics and surveillance	ENSG00000169020	ATP5ME	ATP synthase membrane subunit e [Source:HGNC Symbol;Acc:HGNC:846]	521	Fibrosis	-0.364743	0.00244239	0.0271742	-2.61218	Negative
Others	Mitochondrial dynamics and surveillance	ENSG00000169228	RAB24	RAB24, member RAS oncogene family [Source:HGNC Symbol;Acc:HGNC:9765]	53917	Fibrosis	0.327006	0.00720496	0.0415508	2.14237	Positive
Others	Mitochondrial dynamics and surveillance	ENSG00000184117	NIPSNAP1	nipsnap homolog 1 [Source:HGNC Symbol;Acc:HGNC:7827]	8508	Fibrosis	-0.322559	0.00683818	0.0403661	-2.16506	Negative
Others	Mitochondrial dynamics and surveillance	ENSG00000214253	FIS1	fission, mitochondrial 1 [Source:HGNC Symbol;Acc:HGNC:21689]	51024	Fibrosis	-0.522348	4.4584e-06	0.00961665	-5.35082	Negative
Others	Protein import, sorting and homeostasis	ENSG00000078618	NRDC	nardilysin convertase [Source:HGNC Symbol;Acc:HGNC:7995]	4898	Fibrosis	0.304747	0.0105399	0.0494484	1.97716	Positive
Others	Protein import, sorting and homeostasis	ENSG00000115541	HSPE1	heat shock protein family E (Hsp10) member 1 [Source:HGNC Symbol;Acc:HGNC:5269]	3336	Fibrosis	-0.336225	0.00517558	0.0357954	-2.28604	Negative
Others	Protein import, sorting and homeostasis	ENSG00000163528	CHCHD4	coiled-coil-helix-coiled-coil-helix domain containing 4 [Source:HGNC Symbol;Acc:HGNC:26467]	131474	Fibrosis	-0.345663	0.00340126	0.0299165	-2.46836	Negative
Others	Protein import, sorting and homeostasis	ENSG00000164284	GRPEL2	GrpE like 2, mitochondrial [Source:HGNC Symbol;Acc:HGNC:21060]	134266	Fibrosis	0.314957	0.00840977	0.04482	2.07522	Positive
Others	Protein import, sorting and homeostasis	ENSG00000166896	ATP23	ATP23 metallopeptidase and ATP synthase assembly factor homolog [Source:HGNC Symbol;Acc:HGNC:29452]	91419	Fibrosis	-0.322909	0.00756185	0.0426591	-2.12137	Negative
Others	Protein import, sorting and homeostasis	ENSG00000172878	METAP1D	methionyl aminopeptidase type 1D, mitochondrial [Source:HGNC Symbol;Acc:HGNC:32583]	254042	Fibrosis	-0.30777	0.0107237	0.0496881	-1.96965	Negative
Others	Protein import, sorting and homeostasis	ENSG00000205981	DNAJC19	DnaJ heat shock protein family (Hsp40) member C19 [Source:HGNC Symbol;Acc:HGNC:30528]	131118	Fibrosis	-0.413231	0.000488366	0.0164536	-3.31125	Negative
Others	Small molecule transport	ENSG00000060762	MPC1	mitochondrial pyruvate carrier 1 [Source:HGNC Symbol;Acc:HGNC:21606]	51660	Fibrosis	-0.397246	0.000500638	0.0166721	-3.30048	Negative
Others	Small molecule transport	ENSG00000102743	SLC25A15	solute carrier family 25 member 15 [Source:HGNC Symbol;Acc:HGNC:10985]	10166	Fibrosis	-0.318107	0.00806085	0.0438943	-2.09362	Negative
Others	Small molecule transport	ENSG00000107819	SFXN3	sideroflexin 3 [Source:HGNC Symbol;Acc:HGNC:16087]	81855	Fibrosis	0.385623	0.00109075	0.0206239	2.96227	Positive
Others	Small molecule transport	ENSG00000140107	SLC25A47	solute carrier family 25 member 47 [Source:HGNC Symbol;Acc:HGNC:20115]	283600	Fibrosis	-0.311557	0.00669313	0.0403661	-2.17437	Negative
Others	Small molecule transport	ENSG00000148339	SLC25A25	solute carrier family 25 member 25 [Source:HGNC Symbol;Acc:HGNC:20663]	114789	Fibrosis	-0.386421	0.00117683	0.0209259	-2.92929	Negative
Others	Small molecule transport	ENSG00000151729	SLC25A4	solute carrier family 25 member 4 [Source:HGNC Symbol;Acc:HGNC:10990]	291	Fibrosis	-0.434963	0.000127646	0.0107565	-3.89399	Negative
Others	Small molecule transport	ENSG00000154258	ABCA9	ATP binding cassette subfamily A member 9 [Source:HGNC Symbol;Acc:HGNC:39]	10350	Fibrosis	-0.361253	0.00207191	0.0257227	-2.68363	Negative
Others	Small molecule transport	ENSG00000156398	SFXN2	sideroflexin 2 [Source:HGNC Symbol;Acc:HGNC:16086]	118980	Fibrosis	-0.350799	0.00338883	0.0298528	-2.46995	Negative
Others	Small molecule transport	ENSG00000182902	SLC25A18	solute carrier family 25 member 18 [Source:HGNC Symbol;Acc:HGNC:10988]	83733	Fibrosis	-0.403618	0.000708583	0.0186799	-3.14961	Negative
Others	Signaling	ENSG00000115468	EFHD1	EF-hand domain family member D1 [Source:HGNC Symbol;Acc:HGNC:29556]	80303	Fibrosis	-0.319923	0.00626665	0.0394573	-2.20296	Negative
Others	Signaling	ENSG00000133315	MACROD1	mono-ADP ribosylhydrolase 1 [Source:HGNC Symbol;Acc:HGNC:29598]	28992	Fibrosis	-0.314684	0.00658013	0.0401138	-2.18177	Negative
Others	Signaling	ENSG00000135441	BLOC1S1	biogenesis of lysosomal organelles complex 1 subunit 1 [Source:HGNC Symbol;Acc:HGNC:4200]	2647	Fibrosis	-0.347801	0.00348784	0.0301642	-2.45744	Negative
Others	Signaling	ENSG00000148339	SLC25A25	solute carrier family 25 member 25 [Source:HGNC Symbol;Acc:HGNC:20663]	114789	Fibrosis	-0.386421	0.00117683	0.0209259	-2.92929	Negative
Others	Signaling	ENSG00000151729	SLC25A4	solute carrier family 25 member 4 [Source:HGNC Symbol;Acc:HGNC:10990]	291	Fibrosis	-0.434963	0.000127646	0.0107565	-3.89399	Negative
