# Supplementary material for: Global molecular landscape of early MASLD progression in human obesity
Source: eLife. 2026 Mar 23;14:RP109534. doi: 10.7554/eLife.109534 (PMC13008360; doi:10.7554/eLife.109534)
Supplement: Supplementary file 7. [file elife-109534-supp7.xlsx]

## Sheet: Sheet1
Classification	Official Gene symbol	Alias (optional)	Biological Function	Description	Refs	Details	Cellular Component	coef_steatosis	pval_steatosis	qval_steatosis	coef_NAS	pval_NAS	qval_NAS	Coef_Fibrosis	pval_Fibrosis	qval_Fibrosis
Autophagy core	ULK1	ULK1	ULK1 complex	unc-51 like autophagy activating kinase 1	Cell Res. 2014 Jan;24(1):24–41 _x000D__x000D_ The machinery of macroautophagy. _x000D__x000D_ Feng Y, He D, Yao Z, Klionsky DJ.			0.393923	0.000824786	0.0182418	0.202872	0.00150693	0.0381305	0.316251	0.00770465	0.0430281
Autophagy core	PINK1	PINK1	Beclin1/PI3K complex interacting proteins	PTEN induced putative kinase 1	Cell Death Differ. 2010 Jun;17(6):962–974_x000D__x000D_ The Parkinson-associated protein PINK1 interacts with Beclin1 and promotes autophagy._x000D__x000D_ Michiorri S, Gelmetti V, Giarda E, Lombardi F, Romano F, Marongiu R, Nerini-Molteni S, Sale P, Vago R, Arena G, Torosantucci L, Cassina L, Russo MA, Dallapiccola B, Valente EM, Casari G.			0.365103	0.00235005	0.0300573	0.176526	0.00686112	0.0733075	0.0252289	0.837107	0.446344
Autophagy core	STK38	STK38	Beclin1/PI3K complex interacting proteins		Curr Biol. 2015 Oct 5;25(19):2479–2492_x000D__x000D_ The Pro-apoptotic STK38 Kinase Is a New Beclin1 Partner Positively Regulating Autophagy. _x000D__x000D_ Joffre C, Dupont N, Hoa L, Gomez V, Pardo R, Gonçalves-Pimentel C, Achard P, Bettoun A, Meunier B, Bauvy C, Cascone I, Codogno P, Fanto M, Hergovich A, Camonis J.			0.402167	0.000473095	0.0139438	0.196342	0.00173064	0.0404502	0.384025	0.000834329	0.0197984
Autophagy core	ATG4A	ATG4A	ATG8 Ubiquitin-like conjugation systems	autophagy related 4A, cysteine peptidase	Cell Res. 2014 Jan;24(1):24–41 _x000D__x000D_ The machinery of macroautophagy. _x000D__x000D_ Feng Y, He D, Yao Z, Klionsky DJ. _x000D__x000D_ J Cell Sci. 2012 May 15;125(Pt10):2343–2348_x000D__x000D_ Ubiquitin-like proteins and autophagy at a glance._x000D__x000D_ Shpilka T, Mizushima N, Elazar Z.			0.396548	0.000785085	0.0178493	0.198432	0.00199719	0.041847	0.209475	0.081879	0.126841
Autophagy core	ATG2A	ATG2A	ATG9 and its cycling system	autophagy related 2A	Cell Res. 2014 Jan;24(1):24–41 _x000D__x000D_ The machinery of macroautophagy. _x000D__x000D_ Feng Y, He D, Yao Z, Klionsky DJ.			0.362947	0.00293492	0.0332748	0.220748	0.000759783	0.0281967	0.168897	0.173074	0.188383
Autophagy core	WIPI2	WIPI2	ATG9 and its cycling system	WD repeat domain, phosphoinositide interacting 2	Autophagy. 2010 May;6(4):506–522._x000D__x000D_ Mammalian Atg18 (WIPI2) localizes to omegasome-anchored phagophores and positively regulates LC3 lipidation._x000D__x000D_ Polson HE, de Lartigue J, Rigden DJ, Reedijk M, Urbé S, Clague MJ, Tooze SA.			0.394789	0.000963739	0.0198427	0.19338	0.00296772	0.0507626	0.321998	0.00748125	0.042464
Autophagy core	ATG9A	ATG9A	ATG9 and its cycling system	autophagy related 9A	Cell Res. 2014 Jan;24(1):24–41 _x000D__x000D_ The machinery of macroautophagy. _x000D__x000D_ Feng Y, He D, Yao Z, Klionsky DJ.			0.324838	0.00741671	0.0520619	0.192574	0.0032168	0.0522085	0.319419	0.00824607	0.044462
Autophagy core	ATG16L1	ATG16L1	ATG12 Ubiquitin-like conjugation systems	autophagy related 16-like 1 (S. cerevisiae)	Cell Res. 2014 Jan;24(1):24–41 _x000D__x000D_ The machinery of macroautophagy. _x000D__x000D_ Feng Y, He D, Yao Z, Klionsky DJ. _x000D__x000D_ J Cell Sci. 2012 May 15;125(Pt10):2343–2348_x000D__x000D_ Ubiquitin-like proteins and autophagy at a glance._x000D__x000D_ Shpilka T, Mizushima N, Elazar Z.			0.378591	0.00160587	0.0245358	0.174939	0.00751508	0.0773391	0.185668	0.128485	0.161214
Autophagy core	OPTN	OPTINUERIN	Cargo receptors for Selective Autophagy	optineurin	Nat Rev Mol Cell Biol. 2018 Jun;19(6):349-364. _x000D__x000D_ Mechanism and medical implications of mammalian autophagy._x000D__x000D_ Dikic I, Elazar Z.			0.104248	0.398499	0.3995	0.00505854	0.939763	0.623001	0.337194	0.00514842	0.0357362
Autophagy core	CBL	c-CBL	Cargo receptors for Selective Autophagy	Cbl proto-oncogene, E3 ubiquitin protein ligase	Cell Death Differ. 2013 Jan;20(1):21–30._x000D__x000D_ Ubiquitination and selective autophagy._x000D__x000D_ Shaid S, Brandts CH, Serve H, Dikic I.			0.0678878	0.571361	0.474189	0.0588895	0.363443	0.416564	0.325582	0.00537836	0.0364417
Autophagy core	NEDD4L	NED4L	Negative Regulator of Autophagy	neural precursor cell expressed, developmentally down-regulated 4-like, E3 ubiquitin protein ligase	J Cell Biol. 2016 Dec 19;215(6):841–856_x000D__x000D_ Fine-tuning of ULK1 mRNA and protein levels is required for autophagy oscillation._x000D__x000D_ Nazio F, Carinci M, Valacca C, Bielli P, Strappazzon F, Antonioli M, Ciccosanti F, Rodolfo C, Campello S, Fimia GM, Sette C, Bonaldo P, Cecconi F.			-0.301422	0.0098594	0.0596356	-0.144224	0.0230514	0.123942	-0.377476	0.00102937	0.0201831
Autophagy core	CAPN1		Negative Regulator of Autophagy	calpain 1, (mu/I) large subunit,	Autophagy. 2010 Jan;6(1):61–66_x000D__x000D_ Control of basal autophagy by calpain1 mediated cleavage of ATG5. _x000D__x000D_ Xia HG, Zhang L, Chen G, Zhang T, Liu J, Jin M, Ma X, Ma D, Yuan J.			0.36797	0.00236877	0.0301296	0.209698	0.00132205	0.0357924	0.138317	0.262097	0.235715
Autophagy core	MAPK14		Negative Regulator of Autophagy	mitogen-activated protein kinase 14	EMBO J. 2010 Jan 6;29(1):27–40_x000D__x000D_ Coordinated regulation of autophagy by p38alpha MAPK through mAtg9 and p38IP._x000D__x000D_ Webber JL, Tooze SA.			0.391978	0.00124277	0.0217349	0.191974	0.00365472	0.0558426	0.102439	0.409875	0.301349
Autophagy core	DRAM1	DRAM1	Positive regulator of Autophagy	DNA-damage regulated autophagy modulator 1	PLoS One. 2013 May 17;8(5):e63245_x000D__x000D_ DRAM1 regulates autophagy flux through lysosomes._x000D__x000D_ Zhang XD, Qi L, Wu JC, Qin ZH.			-0.0401923	0.742414	0.534025	-0.0427021	0.518323	0.485953	0.312109	0.00901341	0.0461825
Autophagy core	HDAC1	HDAC1	Positive regulator of Autophagy	histone deacetylase 1	Proc Natl Acad Sci U S A. 2012 Jan 31;109(5):1649–1654_x000D__x000D_ Histone deacetylases 1 and 2 regulate autophagy flux and skeletal muscle homeostasis in mice. _x000D__x000D_ Moresi V, Carrer M, Grueter CE, Rifki OF, Shelton JM, Richardson JA, Bassel-Duby R, Olson EN.			0.393744	0.000731575	0.0173068	0.175863	0.00580665	0.0672191	0.3673	0.00163315	0.0233045
Autophagy core	PDCD6IP		Positive regulator of Autophagy	programmed cell death 6 interacting protein	Nat Cell Biol. 2015 Mar;17(3):300–310_x000D__x000D_ ATG12-ATG3 interacts with Alix to promote basal autophagic flux and late endosome function. _x000D__x000D_ Murrow L, Malhotra R, Debnath J.			0.337378	0.0050611	0.0425205	0.156048	0.0172404	0.110272	0.387075	0.00113973	0.0207792
Autophagy core	SUPT20H		Positive regulator of Autophagy	suppressor of Ty 20 homolog (S. cerevisiae)	EMBO J. 2010 Jan 6;29(1):27–40_x000D__x000D_ Coordinated regulation of autophagy by p38alpha MAPK through mAtg9 and p38IP._x000D__x000D_ Webber JL, Tooze SA.			0.250671	0.0281315	0.103432	0.143241	0.0202096	0.117931	0.30579	0.00677064	0.0403661
Autophagy core	DAPK3		Positive regulator of Autophagy	death-associated protein kinase 3	J Biol Chem. 2016 May 13;291(20):10858–10866_x000D__x000D_ Regulation of Beclin 1 Protein Phosphorylation and Autophagy by Protein Phosphatase 2A (PP2A) and Death-associated Protein Kinase 3 (DAPK3). _x000D__x000D_ Fujiwara N, Usui T, Ohama T, Sato K.			0.0289875	0.816367	0.56023	0.0150217	0.823994	0.589698	0.370813	0.00219744	0.0267086
Autophagy core	PXN		Positive regulator of Autophagy	paxillin	Oncogene. 2017 Mar 23;36(12):1619–1630_x000D__x000D_ Autophagy in cancer metastasis._x000D__x000D_ Mowers EE, Sharifi MN, Macleod KF.			0.295281	0.0121773	0.0672276	0.164384	0.00981661	0.0879354	0.37917	0.00106655	0.0203465
Autophagy core	TGM2		Positive regulator of Autophagy	transglutaminase 2	Autophagy. 2009 Nov;5(8):1145–1154._x000D__x000D_ Transglutaminase 2 is involved in autophagosome maturation._x000D__x000D_ D'Eletto M, Farrace MG, Falasca L, Reali V, Oliverio S, Melino G, Griffin M, Fimia GM, Piacentini M.			0.453399	0.000159179	0.00856147	0.214629	0.00107085	0.0322106	0.078423	0.528295	0.347306
Autophagy core	RAB5B	RAB5B	Rab proteins involved in autophagosome formation	RAB5B, member RAS oncogene family	Cell Death Differ. 2014 Mar;21(3):348–358_x000D__x000D_ Regulation of autophagy by the Rab GTPase network. _x000D__x000D_ Ao X, Zou L, Wu Y.			0.13346	0.260567	0.322834	0.0299592	0.641665	0.533847	0.341041	0.00320263	0.029566
Autophagy core	RAB32	RAB32	Rab proteins involved in autophagosome formation	RAB32, member RAS oncogene family	Cell Death Differ. 2014 Mar;21(3):348–358_x000D__x000D_ Regulation of autophagy by the Rab GTPase network. _x000D__x000D_ Ao X, Zou L, Wu Y.			0.253481	0.0325412	0.11181	0.0949873	0.141442	0.280128	0.367844	0.00156437	0.0232388
Autophagy core	RAB24	RAB24	Rab proteins involved in autophagosome formation	RAB24, member RAS oncogene family	Cell Death Differ. 2014 Mar;21(3):348–358_x000D__x000D_ Regulation of autophagy by the Rab GTPase network. _x000D__x000D_ Ao X, Zou L, Wu Y.			0.230483	0.0619382	0.157421	0.0842454	0.209754	0.32504	0.327006	0.00720496	0.0415508
Autophagy core	RAB4A	RAB4A	Rab proteins involved in autophagosome formation	RAB4A, member RAS oncogene family	PLoS One. 2014 Jan 3;9(1):e84392_x000D__x000D_ HRES-1/Rab4 promotes the formation of LC3(+) autophagosomes and the accumulation of mitochondria during autophagy. _x000D__x000D_ Talaber G, Miklossy G, Oaks Z, Liu Y, Tooze SA, Chudakov DM, Banki K, Perl A.			-0.178471	0.148734	0.244003	-0.0833814	0.213138	0.327594	-0.385557	0.00134985	0.0220697
Autophagy core	RAB4B	RAB4B	Rab proteins involved in autophagosome formation	RAB4B, member RAS oncogene family	PLoS One. 2014 Jan 3;9(1):e84392_x000D__x000D_ HRES-1/Rab4 promotes the formation of LC3(+) autophagosomes and the accumulation of mitochondria during autophagy. _x000D__x000D_ Talaber G, Miklossy G, Oaks Z, Liu Y, Tooze SA, Chudakov DM, Banki K, Perl A.			0.370586	0.00202746	0.027972	0.166982	0.0108256	0.0912054	0.278163	0.0215634	0.0666379
Autophagy core	USP8		Ubiquitin and Autophagy	ubiquitin specific peptidase 8	EMBO J. 2014 Nov 3;33(21):2473–2491_x000D__x000D_ USP8 regulates mitophagy by removing K6-linked ubiquitin conjugates from parkin._x000D__x000D_ Durcan TM, Tang MY, Pérusse JR, Dashti EA, Aguileta MA, McLelland GL, Gros P, Shaler TA, Faubert D, Coulombe B, Fon EA.			0.321807	0.00742979	0.0521028	0.131642	0.0448563	0.168974	0.342669	0.00409972	0.0321539
Autophagy core	PIK3AP1		Candidate kinases required for basal Autophagy	phosphoinositide-3-kinase adaptor protein 1	Autophagy. 2009 Oct;5(7):1018–1025_x000D__x000D_ Identification of novel autophagy regulators by a luciferase-based assay for the kinetics of autophagic flux._x000D__x000D_ Farkas T, Høyer-Hansen M, Jäättelä M.			0.331493	0.00674049	0.0495909	0.141887	0.0334755	0.14885	0.191811	0.120644	0.155636
Autophagy core	NRBP2		Candidate kinases required for basal Autophagy	nuclear receptor binding protein 2	Autophagy. 2009 Oct;5(7):1018–1025_x000D__x000D_ Identification of novel autophagy regulators by a luciferase-based assay for the kinetics of autophagic flux._x000D__x000D_ Farkas T, Høyer-Hansen M, Jäättelä M.			-0.186451	0.130993	0.229163	-0.078631	0.240361	0.345031	-0.394242	0.00102438	0.0201831
Autophagy core	NEK9		Candidate kinases required for basal Autophagy	NIMA-related kinase 9	Autophagy. 2009 Oct;5(7):1018–1025_x000D__x000D_ Identification of novel autophagy regulators by a luciferase-based assay for the kinetics of autophagic flux._x000D__x000D_ Farkas T, Høyer-Hansen M, Jäättelä M.			0.432469	0.000321148	0.011838	0.203636	0.00192267	0.041847	0.184268	0.135397	0.165709
Autophagy core	LIMK1		Candidate kinases required for basal Autophagy	LIM domain kinase 1	Autophagy. 2009 Oct;5(7):1018–1025_x000D__x000D_ Identification of novel autophagy regulators by a luciferase-based assay for the kinetics of autophagic flux._x000D__x000D_ Farkas T, Høyer-Hansen M, Jäättelä M.			0.193884	0.104908	0.204969	0.13266	0.0394017	0.159176	0.345447	0.00316991	0.0293641
Autophagy core	GLYCTK		Candidate kinases required for basal Autophagy	glycerate kinase	Autophagy. 2009 Oct;5(7):1018–1025_x000D__x000D_ Identification of novel autophagy regulators by a luciferase-based assay for the kinetics of autophagic flux._x000D__x000D_ Farkas T, Høyer-Hansen M, Jäättelä M.			-0.304115	0.0108136	0.0633972	-0.172907	0.00728525	0.076287	-0.414129	0.000393854	0.0146392
Autophagy core	PRKACA		Candidate kinases required for basal Autophagy	protein kinase, cAMP-dependent, catalytic, alpha	Autophagy. 2009 Oct;5(7):1018–1025_x000D__x000D_ Identification of novel autophagy regulators by a luciferase-based assay for the kinetics of autophagic flux._x000D__x000D_ Farkas T, Høyer-Hansen M, Jäättelä M.			0.33302	0.0026328	0.0316813	0.170618	0.00450956	0.0610237	0.16149	0.151122	0.175247
Autophagy core	ACVR2B		Candidate kinases required for basal Autophagy	activin A receptor, type IIB	Autophagy. 2009 Oct;5(7):1018–1025_x000D__x000D_ Identification of novel autophagy regulators by a luciferase-based assay for the kinetics of autophagic flux._x000D__x000D_ Farkas T, Høyer-Hansen M, Jäättelä M.			-0.42194	0.000370378	0.012444	-0.186693	0.00403002	0.0588385	-0.258479	0.0323254	0.0801156
Autophagy core	MARK4		Candidate kinases required for basal Autophagy	MAP/microtubule affinity-regulating kinase 4	Autophagy. 2009 Oct;5(7):1018–1025_x000D__x000D_ Identification of novel autophagy regulators by a luciferase-based assay for the kinetics of autophagic flux._x000D__x000D_ Farkas T, Høyer-Hansen M, Jäättelä M.			0.0819192	0.507725	0.448346	0.0434166	0.516469	0.485366	0.359872	0.0027651	0.027955
Autophagy core	MAP3K1		Candidate kinases required for basal Autophagy	mitogen-activated protein kinase kinase kinase 1, E3 ubiquitin protein ligase	Autophagy. 2009 Oct;5(7):1018–1025_x000D__x000D_ Identification of novel autophagy regulators by a luciferase-based assay for the kinetics of autophagic flux._x000D__x000D_ Farkas T, Høyer-Hansen M, Jäättelä M.			-0.0998486	0.41181	0.406049	-0.0691051	0.293211	0.378181	0.332796	0.00506709	0.0354278
Autophagy core	PRKCE		Candidate kinases required for basal Autophagy	protein kinase C, epsilon	Autophagy. 2009 Oct;5(7):1018–1025_x000D__x000D_ Identification of novel autophagy regulators by a luciferase-based assay for the kinetics of autophagic flux._x000D__x000D_ Farkas T, Høyer-Hansen M, Jäättelä M.			0.192926	0.101321	0.201621	0.0819441	0.199692	0.319927	0.303966	0.00872424	0.0455705
Autophagy core	CDC42SE2		Candidate kinases required for basal Autophagy	CDC42 small effector 2	Autophagy. 2009 Oct;5(7):1018–1025_x000D__x000D_ Identification of novel autophagy regulators by a luciferase-based assay for the kinetics of autophagic flux._x000D__x000D_ Farkas T, Høyer-Hansen M, Jäättelä M.			0.0470262	0.701667	0.520065	0.0557294	0.400701	0.43601	0.36397	0.00225012	0.0268252
Autophagy core	SKAP1		Candidate kinases required for basal Autophagy	src kinase associated phosphoprotein 1	Autophagy. 2009 Oct;5(7):1018–1025_x000D__x000D_ Identification of novel autophagy regulators by a luciferase-based assay for the kinetics of autophagic flux._x000D__x000D_ Farkas T, Høyer-Hansen M, Jäättelä M.			-0.35396	0.003736	0.0369386	-0.176305	0.00782973	0.0789868	-0.448437	0.000179223	0.0118682
Autophagy regulators	CREB1	CREB, CREB-1	Positive regulator of Autophagy genes	cAMP responsive element binding protein 1	Autophagy. 2013 Dec;9(12):2069-86. _x000D__x000D_ MTOR inhibition attenuates DNA damage and apoptosis through autophagy-mediated suppression of CREB1._x000D__x000D_ Wang Y	regulates genes involved in survival and death.positively regulated by MTOR in mouse embryonic fibroblasts (MEFs) and cancer cell lines		0.0413156	0.729246	0.530463	0.00919909	0.886767	0.608217	0.331075	0.00439316	0.0330798
Autophagy regulators	EGR1	AT225, G0S30, KROX-24, NGFI-A, TIS8, ZIF-268, ZNF225	Positive regulator of Autophagy genes	early growth response 1	Exp Cell Res. 2016 Jan 1;340(1):62-70. _x000D__x000D_ Egr-1 promotes hypoxia-induced autophagy to enhance chemo-resistance of hepatocellular carcinoma cells._x000D__x000D_ Peng WX	hypoxia-induced drug-resistance		-0.371783	0.00207984	0.0283141	-0.203258	0.0018547	0.041847	-0.390817	0.00111639	0.0206875
Autophagy regulators	FOS	AP-1, C-FOS, p55	Positive regulator of Autophagy genes	Fos proto-oncogene, AP-1 transcription factor subunit	Autophagy. 2015 Nov 2;11(11):2057-2073._x000D__x000D_ A pivotal role of FOS-mediated BECN1/Beclin 1 upregulation in dopamine D2 and D3 receptor agonist-induced autophagy activation._x000D__x000D_ Wang JD	regulator of cell proliferation, differentiation, and transformation		-0.389451	0.00109255	0.0206817	-0.193266	0.00288104	0.0505351	-0.395182	0.000866383	0.0197984
Autophagy regulators	HEY2	CHF1, GRIDLOCK, GRL, HERP1, HESR2, HRT2, bHLHb32	Positive regulator of Autophagy genes	hes related family bHLH transcription factor with YRPW motif 2	Curr Genomics. 2010 Jun;11(4):287-96. _x000D__x000D_ Transcription Factor CHF1/Hey2 Regulates Specific Pathways in Serum Stimulated Primary Cardiac Myocytes: Implications for Cardiac Hypertrophy._x000D__x000D_ Yu M	cardiac and neurologic development		-0.426781	0.000241067	0.010263	-0.186736	0.00340445	0.0535689	-0.353139	0.00258979	0.0277064
Autophagy regulators	MAPK1	ERK, ERK-2, ERK2, ERT1, MAPK2, P42MAPK, PRKM1, PRKM2, p38, p40, p41, p41mapk, p42-MAPK	Positive regulator of Autophagy genes	mitogen-activated protein kinase 1	Nature. 2014 Dec 4;516(7529):108-11_x000D__x000D_ Transcriptional regulation of autophagy by an FXR-CREB axis._x000D__x000D_ Seok S; 2) Autophagy. 2015;11(2):332-43._x000D__x000D_ Mitophagy is primarily due to alternative autophagy and requires the MAPK1 and MAPK14 signaling pathways._x000D__x000D_ Hirota Y	proliferation, differentiation, transcription regulation and development		0.197977	0.102276	0.20253	0.112435	0.0860938	0.225228	0.310993	0.00913159	0.0464743
Autophagy regulators	MYC	MRTLC, bHLHe39, c-Myc, MYC	Positive regulator of Autophagy genes	MYC proto-oncogene, bHLH transcription factor	Autophagy. 2017 Mar 4;13(3):554-566._x000D__x000D_ MIR7-3HG, a MYC-dependent modulator of cell proliferation, inhibits autophagy by a regulatory loop involving AMBRA1._x000D__x000D_ Capizzi M	cell cycle progression, apoptosis and cellular transformation		-0.374712	0.00180181	0.0261939	-0.14117	0.0322049	0.146721	-0.176767	0.148029	0.173338
Autophagy regulators	PPARGC1A	LEM6, PGC-1(alpha), PGC-1alpha, PGC-1v, PGC1, PGC1A, PPARGC1	Positive regulator of Autophagy genes	PPARG coactivator 1 alpha	Physiol Rep. 2016 Feb;4(3). pii: e12698. _x000D__x000D_ PGC-1α promotes exercise-induced autophagy in mouse skeletal muscle._x000D__x000D_ Halling JF	transcriptional coactivator that regulates the genes involved in energy metabolism		-0.417103	0.000148237	0.0084989	-0.196734	0.00106179	0.032067	-0.363531	0.00101395	0.0201831
Autophagy regulators	SIRT1	SIRT1	Positive regulator of Autophagy genes	sirtuin 1	Int J Mol Med. 2019 May;43(5):2033-2043._x000D__x000D_ Sirt1 promotes autophagy and inhibits apoptosis to protect cardiomyocytes from hypoxic stress._x000D__x000D_ Luo G	known to regulate epigenetic gene silencing and suppress recombination of rDNA.		-0.408526	0.000600571	0.0153627	-0.219053	0.000677807	0.027497	-0.140289	0.250734	0.230303
Autophagy regulators	SIRT5	SIRT5	Positive regulator of Autophagy genes	sirtuin 5	Autophagy. 2015;11(2):253-70. _x000D__x000D_ SIRT5 regulation of ammonia-induced autophagy and mitophagy._x000D__x000D_ Polletta L	regulates ammonia production and ammonia-induced autophagy by regulating glutamine metabolism.		-0.293399	0.0145506	0.0730933	-0.138057	0.0343484	0.150142	-0.342762	0.00391687	0.0316048
Autophagy regulators	NR1H4	BAR, FXR, HRR-1, HRR1, PFIC5, RIP14	Negative regulator of Autophagy genes	nuclear receptor subfamily 1 group H member 4	Nature. 2014 Dec 4;516(7529):112-5._x000D__x000D_ Nutrient-sensing nuclear receptors coordinate autophagy._x000D__x000D_ Lee JM	ligand-activated transcription factor		-0.307762	0.00902985	0.0573012	-0.152445	0.0171926	0.110248	-0.360569	0.00196849	0.0252581
Docking and fusion	VPS16	HVPS16	HOPS	Vacuolar Protein Sorting-Associated Protein 16 Homolog	Traffic. 2015 Jul;16(7):727–742_x000D__x000D_ Recruitment of VPS33A to HOPS by VPS16 Is Required for Lysosome Fusion with Endosomes and Autophagosomes._x000D__x000D_ Wartosch L, Günesdogan U, Graham SC, Luzio JP.			0.515623	1.04302e-05	0.00312383	0.247007	0.000116363	0.0167604	0.203617	0.0953138	0.137618
Docking and fusion	BIRC6	BRUCE	Tethers, Adaptors	Baculoviral IAP Repeat Containing 6	J Mol Biol. 2019 Nov 2. pii: S0022-2836(19)30624-2. _x000D__x000D_ Autophagosome-Lysosome Fusion._x000D__x000D_ Lőrincz P, Juhász G.			0.263367	0.0289628	0.105463	0.131715	0.0439406	0.167004	0.320382	0.00723649	0.0416356
Lysosome	CTSB	APPS, CPSB		cathepsin B	Brix, K. (2005) Lysosomal proteases. Revival of the Sleeping Beauty. in Lysosomes (Saftig, P., ed) pp. 50 –59, Springer, New York	Lysosomal cysteine proteinases	endolysosome lumen	0.354647	0.00369311	0.0368185	0.209125	0.00147779	0.0376187	0.154495	0.213046	0.210387
Lysosome	ASAH1			N-acylsphingosine amidohydrolase (acid ceramidase) 1			lysosomal lumen	0.364406	0.00265941	0.0318598	0.235604	0.000280743	0.0204913	0.140518	0.255134	0.232576
Lysosome	GALNS			galactosamine (N-acetyl)-6-sulfate sulfatase			lysosomal lumen	0.284961	0.0190184	0.0838165	0.172128	0.00857415	0.0833218	0.328833	0.0062951	0.03955
Lysosome	GLB1			galactosidase, beta 1			lysosomal lumen	0.387922	0.0013615	0.0227064	0.239345	0.000227538	0.0204913	0.215315	0.0803354	0.125564
Lysosome	GNS			glucosamine (N-acetyl)-6-sulfatase			lysosomal lumen	0.427826	0.000312487	0.0116381	0.249141	9.45874e-05	0.0164754	0.417024	0.000428715	0.0156324
Lysosome	LGMN	AEP; LGMN1; PRSC1		legumain	Brix, K. (2005) Lysosomal proteases. Revival of the Sleeping Beauty. in Lysosomes (Saftig, P., ed) pp. 50 –59, Springer, New York	lysosomal cysteine proteinase: it mediates the biosynthetic processing of the ubiquitously expressed cathepsins B, H, and L which also belong to the family of lysosomal cysteine proteinases.	lysosomal lumen	0.451474	0.000145295	0.0084989	0.233789	0.000291585	0.0204913	0.326168	0.00691597	0.0406989
Lysosome	PLBD2	P76		phospholipase B domain containing 2	Biochem J. 2007 Mar 15;402(3):449-58._x000D__x000D_ Biochemical characterization and lysosomal localization of the mannose-6-phosphate protein p76 (hypothetical protein LOC196463)._x000D__x000D_ Jensen AG	lysosomal phospholipase	lysosomal lumen	0.561181	1.32647e-06	0.00114707	0.296677	2.48467e-06	0.00372195	0.160616	0.190897	0.198759
Lysosome	SGSH			N-sulfoglucosamine sulfohydrolase			lysosomal lumen	0.381187	0.00135746	0.0226917	0.214074	0.000859051	0.028794	0.309904	0.00963453	0.0476042
Lysosome	ARL8A			ADP-ribosylation factor-like 8A			lysosomal membrane	0.38685	0.000865845	0.0187995	0.219973	0.00044354	0.0242923	0.262026	0.0260035	0.0725477
Lysosome	ATP13A2			ATPase type 13A2			lysosomal membrane	0.353989	0.00297823	0.0335177	0.19195	0.00291253	0.0505859	0.228189	0.0582467	0.108074
Lysosome	CD68			CD68 molecule			lysosomal membrane	0.486092	3.77091e-05	0.00539401	0.283387	7.52678e-06	0.0051336	0.322851	0.00750792	0.0424802
Lysosome	CLCN6			chloride channel, voltage-sensitive 6			lysosomal membrane	0.109341	0.356181	0.376726	0.0476683	0.457604	0.461108	0.365318	0.00148884	0.0228905
Lysosome	CLCN7	CLC7; CLC-7; OPTA2; OPTB4; PPP1R63		chloride channel, voltage-sensitive 7	EMBO J. 2011 Jun 1;30(11):2140-52._x000D__x000D_ ClC-7 is a slowly voltage-gated 2Cl(-)/1H(+)-exchanger and requires Ostm1 for transport activity._x000D__x000D_ Leisle L; Kasper D, Planells-Cases R, Fuhrmann JC, Scheel O, Zeitz O, Ruether K, Schmitt A, Poët M, Steinfeld R, Schweizer M, Kornak U, Jentsch TJ (2005) Loss of the chloride channel ClC-7 leads to lysosomal storage disease and neurodegen…	Cl− transporter	lysosomal membrane	0.407603	0.000410283	0.0129347	0.216504	0.000532134	0.0246222	0.310856	0.00770416	0.0430281
Lysosome	CLN5	NCL		ceroid-lipofuscinosis, neuronal 5	Exp Cell Res. 2015 Oct 15;338(1):45-53._x000D__x000D_ Proteolytic processing of the neuronal ceroid lipofuscinosis related lysosomal protein CLN5._x000D__x000D_ De Silva B	soluble lysosomal glycoprotein causes neuronal ceroid lipofuscinosis, an inherited neurodegenerative lysosomal storage disorder	lysosomal membrane	0.450364	0.000147766	0.0084989	0.195849	0.0026601	0.0490246	0.175687	0.151159	0.175247
Lysosome	CTNS			cystinosin, lysosomal cystine transporter			lysosomal membrane	0.21567	0.0801581	0.177942	0.108727	0.10343	0.243531	0.365679	0.00244146	0.0271742
Lysosome	DNAJC5			DnaJ (Hsp40) homolog, subfamily C, member 5			lysosomal membrane	0.290623	0.0168397	0.0789073	0.151464	0.0214743	0.120917	0.328921	0.00634931	0.0396686
Lysosome	DRAM1			DNA-damage regulated autophagy modulator 1			lysosomal membrane	-0.0401923	0.742414	0.534025	-0.0427021	0.518323	0.485953	0.312109	0.00901341	0.0461825
Lysosome	GPR137B			G protein-coupled receptor 137B			lysosomal membrane	0.0889427	0.454926	0.42656	0.0574371	0.372153	0.421561	0.376064	0.00109951	0.0206336
Lysosome	MCOLN1			mucolipin 1			lysosomal membrane	0.339346	0.0044892	0.0400367	0.219956	0.000581243	0.0262461	0.208161	0.0845497	0.129001
Lysosome	PI4K2A			phosphatidylinositol 4-kinase type 2 alpha			lysosomal membrane	0.247819	0.0395743	0.123571	0.132168	0.0425574	0.164727	0.476872	3.77835e-05	0.00961665
Lysosome	PSEN1	AD3; FAD; PS1; PS-1; S182		presenilin 1	Cell Rep. 2015 Sep 1;12(9):1430-44._x000D__x000D_ Presenilin 1 Maintains Lysosomal Ca(2+) Homeostasis via TRPML1 by Regulating vATPase-Mediated Lysosome Acidification._x000D__x000D_ Lee JH, McBrayer MK, Wolfe DM, Haslett LJ, Kumar A, Sato Y, Lie PP, Mohan P, Coffey EE, Kompella U, Mitchell CH, Lloyd-Evans E, Nixon RA._x000D__x000D_ A role for presenilins in autophagy revisited: normal acidificati…	regulation of lysosomal vATPase assembly and function	lysosomal membrane	0.241067	0.0475088	0.136379	0.090278	0.172692	0.3015	0.433165	0.000240323	0.0128431
Lysosome	SCARB2			LIPM2			lysosomal membrane	0.28748	0.0141627	0.0722692	0.176314	0.00519364	0.0648324	0.299173	0.0102553	0.0488803
Lysosome	STARD3			StAR-related lipid transfer (START) domain containing 3			lysosomal membrane	0.261269	0.03024	0.107767	0.13221	0.0430553	0.165203	0.32798	0.00589959	0.0381896
Lysosome	TCIRG1	ATP6N1C, ATP6V0A3, Atp6i, OC-116kDa, OC116, OPTB1, Stv1, TIRC7, Vph1, a3		T-cell, immune regulator 1, ATPase, H+ transporting, lysosomal V0 subunit A3	"Sci Rep. 2015; 5: 14827._x000D__x000D_ Mapping the H+ (V)-ATPase interactome: identification of proteins involved in trafficking, folding, assembly and phosphorylation_x000D__x000D_ Maria Merkulova, Teodor G. Păunescu, Anie Azroyan, Vladimir Marshansky, Sylvie Breton, and Dennis Browna."	acidification of the lysosomal compartment in osteoclasts	lysosomal membrane	0.630293	4.47466e-08	0.000321639	0.326888	1.95162e-07	0.00146173	0.310609	0.0111883	0.0505949
Lysosome	TMEM192			transmembrane protein 192			lysosomal membrane	-0.167874	0.172009	0.261949	-0.0815181	0.220773	0.332651	-0.380769	0.00145449	0.0227481
Lysosome	VPS16			vacuolar protein sorting 16 homolog (S. cerevisiae)			lysosomal membrane	0.515623	1.04302e-05	0.00312383	0.247007	0.000116363	0.0167604	0.203617	0.0953138	0.137618
Lysosome	ACP2	LAP		acid phosphatase 2, lysosomal	1) J Biol Chem. 1997 Jul 25;272(30):18628-35._x000D__x000D_ Mice deficient in lysosomal acid phosphatase develop lysosomal storage in the kidney and central nervous system._x000D__x000D_ Saftig P; 2) J Cell Sci. 2002 Jan 1;115(Pt 1):185-94._x000D__x000D_ The tyrosine motifs of Lamp 1 and LAP determine their direct and indirect targetting to lysosomes._x000D__x000D_ Obermüller S	beta subunit of lysosomal acid phosphatase (LAP); lysosomal membrane protein.	lysosome	0.346753	0.00384064	0.0372337	0.134619	0.0403512	0.160403	0.0873113	0.47478	0.326954
Lysosome	CTSD	CLN10, CPSD, HEL-S-130P		cathepsin D	Brix, K. (2005) Lysosomal proteases. Revival of the Sleeping Beauty. in Lysosomes (Saftig, P., ed) pp. 50 –59, Springer, New York	Lysosomal aspartic protease	lysosome	0.395481	0.000993928	0.0200636	0.255499	6.69658e-05	0.0148177	0.0528029	0.668512	0.395265
Lysosome	DRAM2			DNA-damage regulated autophagy modulator 2			lysosome	0.352156	0.00399531	0.0377531	0.165559	0.0129059	0.0973447	0.0677387	0.586838	0.367848
Lysosome	GALC			galactosylceramidase			lysosome	0.273222	0.0210093	0.0889893	0.189842	0.00275109	0.0499257	0.269665	0.0222479	0.0674247
Lysosome	HPS1	HPS; BLOC3S1		Hermansky-Pudlak syndrome 1	Proc Natl Acad Sci U S A. 2003 Jul 22;100(15):8770-5._x000D__x000D_ Biogenesis of lysosome-related organelles complex 3 (BLOC-3): a complex containing the Hermansky-Pudlak syndrome (HPS) proteins HPS1 and HPS4._x000D__x000D_ Nazarian R	components of a protein complex that regulates the intracellular localization of lysosomes and late endosomes	lysosome	0.444974	0.000174495	0.00878225	0.205293	0.00155509	0.039085	0.0372327	0.761822	0.424798
Lysosome	HPS4	LE; BLOC3S2		Hermansky-Pudlak syndrome 4	J Biol Chem. 2010 Mar 5;285(10):7794-804. _x000D__x000D_ Assembly of the biogenesis of lysosome-related organelles complex-3 (BLOC-3) and its interaction with Rab9._x000D__x000D_ Kloer DP, Rojas R, Ivan V, Moriyama K, van Vlijmen T, Murthy N, Ghirlando R, van der Sluijs P, Hurley JH, Bonifacino JS.	biogenesis of lysosome-related organelles	lysosome	0.382277	0.00153185	0.0241742	0.128883	0.0524131	0.181156	0.354505	0.00329963	0.0296955
Lysosome	IFI30			interferon, gamma-inducible protein 30			lysosome	0.361553	0.00301277	0.0335229	0.215687	0.00100444	0.0319506	0.124829	0.314518	0.261284
Lysosome	LRBA			LPS-responsive vesicle trafficking, beach and anchor containing			lysosome	0.426223	0.000287336	0.0112249	0.196061	0.00228768	0.0450438	0.353194	0.00287164	0.0281841
Lysosome	MAN2B1			mannosidase, alpha, class 2B, member 1			lysosome	0.240726	0.0446217	0.131929	0.095989	0.140978	0.279825	0.396205	0.000702346	0.0186564
Lysosome	NEU1			sialidase 1 (lysosomal sialidase)			lysosome	0.0570656	0.61584	0.491224	0.0294799	0.631914	0.53006	0.292464	0.00851256	0.0449466
Lysosome	NEU4			sialidase 4			lysosome	-0.189664	0.118058	0.217609	-0.149232	0.0219585	0.12186	-0.316931	0.00789416	0.0433899
Lysosome	PRDX6			peroxiredoxin 6			lysosome	-0.129285	0.287128	0.33718	-0.0495818	0.451291	0.458504	-0.33555	0.00468272	0.0341142
Lysosome	RAB27A			RAB27A, member RAS oncogene family			lysosome	0.368368	0.00243674	0.0306212	0.170504	0.0100418	0.0885612	0.122215	0.323943	0.265279
Lysosome	RAMP3			receptor (G protein-coupled) activity modifying protein 3			lysosome	-0.313307	0.00678512	0.0496232	-0.15505	0.0136067	0.0998034	-0.294868	0.0107092	0.0496881
Lysosome	UNC93B1			unc-93 homolog B1 (C. elegans)			lysosome	0.367284	0.00223446	0.0291971	0.224636	0.000496118	0.0246222	0.140965	0.249512	0.229777
Lysosome	WDR48			WD repeat domain 48			lysosome	0.14492	0.235781	0.307697	0.0360985	0.586375	0.512826	0.330169	0.00578067	0.037802
Lysosome-related genes	ATP6AP2	PRR; M8-9; MRXE; RENR; XMRE; XPDS; HT028; MRXSH; ELDF10; ATP6IP2; MSTP009; APT6M8-9; ATP6M8-9		ATPase, H+ transporting, lysosomal accessory protein 2	EMBO J. 2011 Jul 29;30(16):3242-58._x000D__x000D_ Regulation of TFEB and V-ATPases by mTORC1._x000D__x000D_ Peña-Llopis S	associated with the transmembrane sector of the V-type ATPases		0.307133	0.00844251	0.055599	0.208962	0.000801671	0.0284845	0.215229	0.0666028	0.114234
Lysosome-related genes	ATP6V0A1	ATP6N1, ATP6N1A, Stv1, VPP1, Vph1, a1		ATPase, H+ transporting, lysosomal V0 subunit a1	Eur J Neurosci. 2013 Jun; 37(12): 1949–1961._x000D__x000D_ Autophagy failure in Alzheimer’s disease and the role of defective lysosomal acidification_x000D__x000D_ Devin M. Wolfe, Ju-hyun Lee, Asok Kumar, Sooyeon Lee, Samantha J. Orenstein, and Ralph A. Nixon	mediating autophagosome-lysosome fusion and lysosomal acidification		0.429568	0.000341066	0.0122553	0.224394	0.000562285	0.0256794	0.164842	0.181013	0.193472
Lysosome-related genes	ATP6V0B	ATP6F, HATPL, VMA16		ATPase, H+ transporting, lysosomal 21kDa, V0 subunit b	Hum Mol Genet. 2011 Oct 1;20(19):3852-66._x000D__x000D_ Characterization of the CLEAR network reveals an integrated control of cellular clearance pathways._x000D__x000D_ Palmieri M	lysosomal acidification (Palmieri_Table 1)		0.350943	0.00326928	0.03472	0.202717	0.00162524	0.0399107	0.21555	0.0741257	0.121218
Lysosome-related genes	ATP6V1A	ATP6A11, HO68, VA68, VPP2, Vma1, ATP6V1A		ATPase, H+ transporting, lysosomal 70kDa, V1 subunit A	1) Hum Mol Genet. 2011 Oct 1;20(19):3852-66._x000D__x000D_ Characterization of the CLEAR network reveals an integrated control of cellular clearance pathways._x000D__x000D_ Palmieri M; 2) Traffic. 2007 Dec;8(12):1676-86._x000D__x000D_ Integral and associated lysosomal membrane proteins._x000D__x000D_ Schröder B.	lysosomal acidification (Palmieri_Table 1)		0.377533	0.00125894	0.021753	0.242274	0.000106715	0.0167511	0.352379	0.00260515	0.0277064
Lysosome-related genes	CLCN3	CLC3, ClC-3		chloride channel, voltage-sensitive 3	J Biol Chem. 2004 Jun 11;279(24):25430-9._x000D__x000D_ AP-3-dependent mechanisms control the targeting of a chloride channel (ClC-3) in neuronal and non-neuronal cells._x000D__x000D_ Salazar G	ClC-3 is ubiquitously expressed and is present in brain synaptic vesicles as well as in late endosome-lysosome compartments in non-neuronal cell lines		0.328778	0.00459122	0.0403938	0.168788	0.00729526	0.076287	0.313228	0.00681941	0.0403661
Lysosome-related genes	PSEN2	AD3L, AD4, CMD1V, PS2, STM2		presenilin 2 (Alzheimer disease 4)	Cell. 2016 Jun 30;166(1):193-208._x000D__x000D_ Restricted Location of PSEN2/γ-Secretase Determines Substrate Specificity and Generates an Intracellular Aβ Pool._x000D__x000D_ Sannerud R, Esselens C, Ejsmont P, Mattera R, Rochin L, Tharkeshwar AK, De Baets G, De Wever V, Habets R, Baert V, Vermeire W, Michiels C, Groot AJ, Wouters R, Dillen K, Vints K, Baatsen P, Munck S, Derua R, Waelkens E, Bas…	building up of an intracellular Aβ Pool		0.479891	5.62554e-05	0.00600817	0.231543	0.000375976	0.0231409	0.261655	0.0328497	0.0805768
Lysosome-related genes	SLC38A9			solute carrier family 38, member 9	Science. 2017 Mar 24;355(6331):1306-1311. _x000D__x000D_ Lysosomal cholesterol activates mTORC1 via an SLC38A9-Niemann-Pick C1 signaling complex._x000D__x000D_ Castellano BM, Thelen AM, Moldavski O, Feltes M, van der Welle RE, Mydock-McGrane L, Jiang X, van Eijkeren RJ, Davis OB, Louie SM, Perera RM, Covey DF, Nomura DK, Ory DS, Zoncu R.	autophagic amino acid sensing (by direct interaction with mTOR complex)		0.351632	0.00350454	0.0358841	0.150918	0.0217466	0.121189	0.106079	0.38705	0.291754
Mitophagy	BNIP3	BNIP3	Mitophagy core	BCL2/adenovirus E1B 19kDa interacting protein 3	J Biol Chem. 2012 Jun 1;287(23):19094-104._x000D__x000D_ Microtubule-associated protein 1 light chain 3 (LC3) interacts with Bnip3 protein to selectively remove endoplasmic reticulum and mitochondria via autophagy._x000D__x000D_ Hanna RA, Quinsay MN, Orogo AM, Giang K, Rikka S, Gustafsson ÅB.			-0.345602	0.00406301	0.0378793	-0.174099	0.00766462	0.0783174	-0.0202003	0.869172	0.455346
Mitophagy	MAPK1	ERK2	Mitophagy core	mitogen-activated protein kinase 1	Autophagy. 2015;11(2):332-43. _x000D__x000D_ Mitophagy is primarily due to alternative autophagy and requires the MAPK1 and MAPK14 signaling pathways._x000D__x000D_ Hirota Y, Yamashita S, Kurihara Y, Jin X, Aihara M, Saigusa T, Kang D, Kanki T.			0.197977	0.102276	0.20253	0.112435	0.0860938	0.225228	0.310993	0.00913159	0.0464743
Mitophagy	MAPK14		Mitophagy core	mitogen-activated protein kinase 14	Autophagy. 2015;11(2):332-43._x000D__x000D_ Mitophagy is primarily due to alternative autophagy and requires the MAPK1 and MAPK14 signaling pathways._x000D__x000D_ Hirota Y, Yamashita S, Kurihara Y, Jin X, Aihara M, Saigusa T, Kang D, Kanki T.			0.391978	0.00124277	0.0217349	0.191974	0.00365472	0.0558426	0.102439	0.409875	0.301349
Mitophagy	ATP13A2		Mitophagy core	ATPase type 13A2	Autophagy. 2013 Nov 1;9(11):1828-36._x000D__x000D_ Proteolytic processing of Atg32 by the mitochondrial i-AAA protease Yme1 regulates mitophagy._x000D__x000D_ Wang K, Jin M, Liu X, Klionsky DJ.			0.353989	0.00297823	0.0335177	0.19195	0.00291253	0.0505859	0.228189	0.0582467	0.108074
Mitophagy	USP8		Mitophagy core	ubiquitin specific peptidase 8	Autophagy. 2015 Nov 3;11(2):428-9. _x000D__x000D_ USP8 and PARK2/parkin-mediated mitophagy._x000D__x000D_ Durcan TM, Fon EA.			0.321807	0.00742979	0.0521028	0.131642	0.0448563	0.168974	0.342669	0.00409972	0.0321539
Mitophagy	PINK1	PINK1	Mitophagy core	PTEN induced putative kinase 1	Nature. 2015 Aug 20;524(7565):309-314. _x000D__x000D_ The ubiquitin kinase PINK1 recruits autophagy receptors to induce mitophagy._x000D__x000D_ Lazarou M, Sliter DA, Kane LA, Sarraf SA, Wang C, Burman JL, Sideris DP, Fogel AI, Youle RJ.			0.365103	0.00235005	0.0300573	0.176526	0.00686112	0.0733075	0.0252289	0.837107	0.446344
Mitophagy	RNF185		Mitophagy core	ring finger protein 185	PLoS One. 2011;6(9):e24367. _x000D__x000D_ RNF185, a novel mitochondrial ubiquitin E3 ligase, regulates autophagy through interaction with BNIP1._x000D__x000D_ Tang F, Wang B, Li N, Wu Y, Jia J, Suo T, Chen Q, Liu YJ, Tang J.			0.172982	0.162805	0.254069	0.0727209	0.279237	0.369055	0.32166	0.00821681	0.0444078
Mitophagy	TGM2	TG2	Mitophagy core	transglutaminase 2	Cell Death Differ. 2015 Mar;22(3):408-18. _x000D__x000D_ Transglutaminase 2 ablation leads to mitophagy impairment associated with a metabolic shift towards aerobic glycolysis._x000D__x000D_ Rossin F, D'Eletto M, Falasca L, Sepe S, Cocco S, Fimia GM, Campanella M, Mastroberardino PG, Farrace MG, Piacentini M.			0.453399	0.000159179	0.00856147	0.214629	0.00107085	0.0322106	0.078423	0.528295	0.347306
Mitophagy	RAB5B	RAB5B	Mitophagy core	RAB5B, member RAS oncogene family	Nat Commun. 2017 Jan 30;8:14050._x000D__x000D_ A Rab5 endosomal pathway mediates Parkin-dependent mitochondrial clearance._x000D__x000D_ Hammerling BC, Najor RH, Cortez MQ, Shires SE, Leon LJ, Gonzalez ER, Boassa D, Phan S, Thor A, Jimenez RE, Li H, Kitsis RN, Dorn GW II, Sadoshima J, Ellisman MH, Gustafsson ÅB.			0.13346	0.260567	0.322834	0.0299592	0.641665	0.533847	0.341041	0.00320263	0.029566
Mitophagy	FNIP1		Mitophagy core	Folliculin Interacting Protein 1	Sci Adv. 2018 Nov 21;4(11):eaav0443._x000D__x000D_ RAB7A phosphorylation by TBK1 promotes mitophagy via the PINK-PARKIN pathway._x000D__x000D_ Heo JM, Ordureau A, Swarup S, Paulo JA, Shen K, Sabatini DM, Harper JW.			-0.354551	0.00372519	0.0368825	-0.161487	0.0153386	0.104519	-0.0797562	0.521945	0.344936
Mitophagy	NIPSNAP1		Mitophagy core	Nipsnap Homolog 1	Dev Cell. 2019 May 20;49(4):509-525.e12. _x000D__x000D_ NIPSNAP1 and NIPSNAP2 Act as .Eat Me. Signals for Mitophagy._x000D__x000D_ Princely Abudu Y, Pankiv S, Mathai BJ, Håkon Lystad A, Bindesbøll C, Brenne HB, Yoke Wui Ng M, Thiede B, Yamamoto A, Mutugi Nthiga T, Lamark T, Esguerra CV, Johansen T, Simonsen A.			-0.255143	0.0345268	0.11497	-0.140797	0.030999	0.143941	-0.322559	0.00683818	0.0403661
Mitophagy	ULK1	ULK1	Mitophagy core	unc-51 like autophagy activating kinase 1	Mol Cell. 2019 Apr 18;74(2):347-362.e6. _x000D__x000D_ Spatiotemporal Control of ULK1 Activation by NDP52 and TBK1 during Selective Autophagy._x000D__x000D_ Vargas JNS, Wang C, Bunker E, Hao L, Maric D, Schiavo G, Randow F, Youle RJ.			0.393923	0.000824786	0.0182418	0.202872	0.00150693	0.0381305	0.316251	0.00770465	0.0430281
Mitophagy	OPTN	OPTINEURIN	Mitophagy-specific cargo receptors	optineurin	Proc Natl Acad Sci U S A. 2016 Apr 12;113(15):4039-44. _x000D__x000D_ Phosphorylation of OPTN by TBK1 enhances its binding to Ub chains and promotes selective autophagy of damaged mitochondria._x000D__x000D_ Richter B, Sliter DA, Herhaus L, Stolz A, Wang C, Beli P, Zaffagnini G, Wild P, Martens S, Wagner SA, Youle RJ, Dikic I.			0.104248	0.398499	0.3995	0.00505854	0.939763	0.623001	0.337194	0.00514842	0.0357362
Mitophagy	FIS1	FIS1	Fission	Fission, Mitochondrial 1	Mol Biol Cell. 2013 Mar;24(5):659-67. _x000D__x000D_ Fis1, Mff, MiD49, and MiD51 mediate Drp1 recruitment in mitochondrial fission._x000D__x000D_ Losón OC, Song Z, Chen H, Chan DC.			-0.355692	0.00260839	0.0316174	-0.216367	0.00065215	0.0274409	-0.522348	4.4584e-06	0.00961665
Mitophagy	SIRT5	SIRT5	Transcription Factors involved in Mitophagy	sirtuin 5	Autophagy. 2015;11(2):253-70. _x000D__x000D_ SIRT5 regulation of ammonia-induced autophagy and mitophagy._x000D__x000D_ Polletta L			-0.293399	0.0145506	0.0730933	-0.138057	0.0343484	0.150142	-0.342762	0.00391687	0.0316048
Mitophagy	SREBF2	SREBF2	Transcription Factors involved in Mitophagy	sterol regulatory element binding transcription factor 2	Int J Biochem Cell Biol. 2014 Oct;55:196-208. _x000D__x000D_ Leishmania donovani activates SREBP2 to modulate macrophage membrane cholesterol and mitochondrial oxidants for establishment of infection._x000D__x000D_ Mukherjee M			0.192226	0.113138	0.212666	0.086303	0.189644	0.312017	0.330157	0.00557017	0.037315
mTOR and upstream pathways	FNIP1		mTOR regulators	folliculin interacting protein 1	Trends Cell Biol. 2014 Jul;24(7):400-6. _x000D__x000D_ Regulation of mTORC1 by amino acids._x000D__x000D_ Bar-Peled L, Sabatini DM.			-0.354551	0.00372519	0.0368825	-0.161487	0.0153386	0.104519	-0.0797562	0.521945	0.344936
mTOR and upstream pathways	FNIP2		mTOR regulators	Folliculin Interacting Protein 2	Nat Rev Mol Cell Biol. 2020 Apr;21(4):183-203. _x000D__x000D_ mTOR at the nexus of nutrition, growth, ageing and disease._x000D__x000D_ Liu GY, Sabatini DM5..			0.354715	0.00351333	0.035923	0.158703	0.0166325	0.10795	0.196581	0.110315	0.148631
mTOR and upstream pathways	WDR24		mTOR regulators	WD repeat domain 24	Trends Cell Biol. 2014 Jul;24(7):400-6. _x000D__x000D_ Regulation of mTORC1 by amino acids._x000D__x000D_ Bar-Peled L, Sabatini DM.			0.426659	0.000232844	0.010263	0.206447	0.00109485	0.0325405	0.120691	0.31301	0.260745
mTOR and upstream pathways	SLC38A9		mTOR regulators	solute carrier family 38, member 9	Science. 2017 Mar 24;355(6331):1306-1311._x000D__x000D_ Lysosomal cholesterol activates mTORC1 via an SLC38A9-Niemann-Pick C1 signaling complex._x000D__x000D_ Castellano BM, Thelen AM, Moldavski O, Feltes M, van der Welle RE, Mydock-McGrane L, Jiang X, van Eijkeren RJ, Davis OB, Louie SM, Perera RM, Covey DF, Nomura DK, Ory DS, Zoncu R._x000D__x000D_			0.351632	0.00350454	0.0358841	0.150918	0.0217466	0.121189	0.106079	0.38705	0.291754
mTOR and upstream pathways	LGALS8	GAL8	mTOR regulators	Galectin 8	Mol Cell. 2018 Apr 5;70(1):120-135.e8. _x000D__x000D_ Galectins Control mTOR in Response to Endomembrane Damage._x000D__x000D_ Jia J, Abudu YP, Claude-Taupin A, Gu Y, Kumar S, Choi SW, Peters R, Mudd MH, Allers L, Salemi M, Phinney B, Johansen T, Deretic V.			0.189967	0.126274	0.225338	0.0443426	0.511799	0.483817	0.315703	0.00980893	0.0479142
mTOR and upstream pathways	ATP6V0A1	ATP6N1, ATP6N1A, Stv1, VPP1, Vph1, a1	mTOR regulators	ATPase, H+ transporting, lysosomal V0 subunit a1	Sci Rep. 2015; 5: 14827._x000D__x000D_ Mapping the H+ (V)-ATPase interactome: identification of proteins involved in trafficking, folding, assembly and phosphorylation_x000D__x000D_ Maria Merkulova, Teodor G. Păunescu, Anie Azroyan, Vladimir Marshansky, Sylvie Breton, and Dennis Browna.			0.429568	0.000341066	0.0122553	0.224394	0.000562285	0.0256794	0.164842	0.181013	0.193472
mTOR and upstream pathways	ATP6V0B	ATP6F, HATPL, VMA16	mTOR regulators	ATPase, H+ transporting, lysosomal 21kDa, V0 subunit b	Hum Mol Genet. 2011 Oct 1;20(19):3852-66._x000D__x000D_ Characterization of the CLEAR network reveals an integrated control of cellular clearance pathways._x000D__x000D_ Palmieri M			0.350943	0.00326928	0.03472	0.202717	0.00162524	0.0399107	0.21555	0.0741257	0.121218
mTOR and upstream pathways	TCIRG1	ATP6N1C, ATP6V0A3, Atp6i, OC-116kDa, OC116, OPTB1, Stv1, TIRC7, Vph1, a3	mTOR regulators	T-cell, immune regulator 1, ATPase, H+ transporting, lysosomal V0 subunit A3	"Sci Rep. 2015; 5: 14827._x000D__x000D_ Mapping the H+ (V)-ATPase interactome: identification of proteins involved in trafficking, folding, assembly and phosphorylation_x000D__x000D_ Maria Merkulova, Teodor G. Păunescu, Anie Azroyan, Vladimir Marshansky, Sylvie Breton, and Dennis Browna."			0.630293	4.47466e-08	0.000321639	0.326888	1.95162e-07	0.00146173	0.310609	0.0111883	0.0505949
mTOR and upstream pathways	ATP6AP2	PRR; M8-9; MRXE; RENR; XMRE; XPDS; HT028; MRXSH; ELDF10; ATP6IP2; MSTP009; APT6M8-9; ATP6M8-9	mTOR regulators	ATPase, H+ transporting, lysosomal accessory protein 2	EMBO J. 2011 Jul 29;30(16):3242-58._x000D__x000D_ Regulation of TFEB and V-ATPases by mTORC1._x000D__x000D_ Peña-Llopis S			0.307133	0.00844251	0.055599	0.208962	0.000801671	0.0284845	0.215229	0.0666028	0.114234
mTOR and upstream pathways	ATP6V1A	ATP6A11, HO68, VA68, VPP2, Vma1, ATP6V1A	mTOR regulators	ATPase, H+ transporting, lysosomal 70kDa, V1 subunit A	1) Hum Mol Genet. 2011 Oct 1;20(19):3852-66._x000D__x000D_ Characterization of the CLEAR network reveals an integrated control of cellular clearance pathways._x000D__x000D_ Palmieri M; 2) Traffic. 2007 Dec;8(12):1676-86._x000D__x000D_ Integral and associated lysosomal membrane proteins._x000D__x000D_ Schröder B.			0.377533	0.00125894	0.021753	0.242274	0.000106715	0.0167511	0.352379	0.00260515	0.0277064
mTOR and upstream pathways	MTOR		mTOR complexes 1 and 2	mechanistic target of rapamycin (serine/threonine kinase)	Nat Rev Mol Cell Biol. 2020 Jan 14._x000D__x000D_ mTOR at the nexus of nutrition, growth, ageing and disease. _x000D__x000D_ Liu GY, Sabatini DM.			0.433102	0.000167775	0.0087389	0.214159	0.000637164	0.027115	0.278407	0.0177361	0.0613701
mTOR and upstream pathways	DEPTOR		mTOR complexes 1 and 2	DEP domain containing MTOR-interacting protein	Nat Rev Mol Cell Biol. 2020 Jan 14._x000D__x000D_ mTOR at the nexus of nutrition, growth, ageing and disease. _x000D__x000D_ Liu GY, Sabatini DM.			-0.294164	0.012592	0.0684612	-0.133751	0.0370099	0.154817	-0.304525	0.00940498	0.0470751
mTOR and upstream pathways	TTI2		mTOR complexes 1 and 2	TELO2 interacting protein 2	J Cell Biol. 2013 Nov 25;203(4):563-74. _x000D__x000D_ Where is mTOR and what is it doing there?_x000D__x000D_ Betz C, Hall MN.			0.321223	0.00653368	0.0486675	0.156962	0.014428	0.101881	0.235331	0.0476146	0.0972627
mTOR and upstream pathways	STK11	LKB1	AMPK activator	serine/threonine kinase 11	Nat Rev Drug Discov. 2011 Oct 31;10(11):868-80._x000D__x000D_ Rapamycin passes the torch: a new generation of mTOR inhibitors._x000D__x000D_ Benjamin D, Colombi M, Moroni C, Hall MN.			0.30541	0.0116509	0.0661884	0.208104	0.00131655	0.0357924	0.364966	0.00227644	0.0268252
mTOR and upstream pathways	CAB39		AMPK activator	calcium binding protein 39	Cardiovasc Pharm Open Access. 2015 Aug;4(3):154._x000D__x000D_ AMP-Activated Protein Kinase Signalling in Cancer and Cardiac Hypertrophy._x000D__x000D_ Lipovka Y, Konhilas JP.			0.290289	0.0161109	0.0771522	0.157363	0.0159035	0.106359	0.454357	0.000104094	0.0103397
mTOR and upstream pathways	PIK3CB		PI3K complex-class 1	phosphatidylinositol-4,5-bisphosphate 3-kinase, catalytic subunit beta	J Cell Sci. 2014 Mar 1;127(Pt 5):923-8._x000D__x000D_ Classes of phosphoinositide 3-kinases at a glance._x000D__x000D_ Jean S, Kiger AA.			0.354875	0.00362809	0.0366274	0.174209	0.00859936	0.0833218	0.410155	0.000661715	0.0186564
mTOR and upstream pathways	PIK3CD		PI3K complex-class 1	phosphatidylinositol-4,5-bisphosphate 3-kinase, catalytic subunit delta	J Cell Sci. 2014 Mar 1;127(Pt 5):923-8._x000D__x000D_ Classes of phosphoinositide 3-kinases at a glance._x000D__x000D_ Jean S, Kiger AA.			0.160778	0.181183	0.26936	0.0573592	0.379342	0.425136	0.378291	0.00120782	0.0210806
mTOR and upstream pathways	PIK3R2		PI3K complex-class 1	phosphoinositide-3-kinase, regulatory subunit 2 (beta)	J Cell Sci. 2014 Mar 1;127(Pt 5):923-8._x000D__x000D_ Classes of phosphoinositide 3-kinases at a glance._x000D__x000D_ Jean S, Kiger AA.			0.308471	0.0102871	0.0613134	0.203479	0.00158651	0.0396088	0.225056	0.0624608	0.111315
mTOR and upstream pathways	RPS6KA1	RSK1	mTORC1 substrates	ribosomal protein S6 kinase, 90kDa, polypeptide 1	Nat Rev Mol Cell Biol. 2014 Mar;15(3):155-62._x000D__x000D_ Making new contacts: the mTOR network in metabolism and signalling crosstalk._x000D__x000D_ Shimobayashi M, Hall MN			0.316882	0.00839431	0.0555039	0.163977	0.0118531	0.0941471	0.421594	0.000344943	0.013684
mTOR and upstream pathways	ESR1	estrogen receptor 1	mTORC1 substrates	estrogen receptor 1	Oncogene. 2016 Jul 7;35(27):3535-43._x000D__x000D_ mTORC1 directly phosphorylates and activates ERα upon estrogen stimulation._x000D__x000D_ Alayev A, Salamon RS, Berger SM, Schwartz NS, Cuesta R, Snyder RB, Holz MK.			-0.201251	0.0873654	0.18481	-0.111754	0.0792206	0.216946	-0.318663	0.0058955	0.0381896
mTOR and upstream pathways	ULK1	ULK1	mTORC1 substrates	unc-51 like autophagy activating kinase 1	Cell Res. 2014 Jan;24(1):24-41._x000D__x000D_ The machinery of macroautophagy._x000D__x000D_ Feng Y, He D, Yao Z, Klionsky DJ.			0.393923	0.000824786	0.0182418	0.202872	0.00150693	0.0381305	0.316251	0.00770465	0.0430281
mTOR and upstream pathways	RPS6KB2	S6K2	mTORC1 substrates	ribosomal protein S6 kinase, 70kDa, polypeptide 2	J Cell Sci. 2013 Apr 15;126(Pt 8):1713-9. _x000D__x000D_ Regulation of mTORC1 and its impact on gene expression at a glance._x000D__x000D_ Laplante M, Sabatini DM.			0.337381	0.00584144	0.0458897	0.171998	0.00957497	0.0878478	0.0403119	0.746162	0.420255
mTOR and upstream pathways	AKT1	AKT1	mTORC2 substrates	v-akt murine thymoma viral oncogene homolog 1	Nat Rev Mol Cell Biol. 2014 Mar;15(3):155-62._x000D__x000D_ Making new contacts: the mTOR network in metabolism and signalling crosstalk._x000D__x000D_ Shimobayashi M, Hall MN			0.413934	0.000582469	0.0152691	0.200416	0.00223852	0.0444725	0.14268	0.247871	0.228945
mTOR and upstream pathways	KRAS		RAS family	Kirsten rat sarcoma viral oncogene homolog	Oncotarget. 2014 Feb 15;5(3):577-86._x000D__x000D_ Ras and autophagy in cancer development and therapy._x000D__x000D_ Schmukler E, Kloog Y, Pinkas-Kramarski R.			0.384203	0.00160254	0.0245358	0.16401	0.0138005	0.100432	0.226036	0.0673584	0.115187
