# Supplementary material for: Global molecular landscape of early MASLD progression in human obesity
Source: eLife. 2026 Mar 23;14:RP109534. doi: 10.7554/eLife.109534 (PMC13008360; doi:10.7554/eLife.109534)
Supplement: Supplementary file 8. [file elife-109534-supp8.xlsx]

## Sheet: Fig.3B
Category	GOterm	Function	HypergeoPval	GOterm_size	GOterm_inbg_size	Proportion	DE_GO_size	Background_size	DE_size	DE_genes
Upregulated GO terms for genes associated with steatosis	GO:0006508	proteolysis	5.49366e-05	430	229	0.532558	30	11770	715	ADAMTSL4;AGTPBP1;APEH;ASRGL1;ATG4A;CAPN1;CASP4;CD46;CPD;CPM;CTSB;CTSD;DESI1;DPP3;DPP9;FBXO2;FBXO3;FBXO6;FURIN;GCA;HTRA1;IDE;LGMN;PITRM1;RNPEP;RNPEPL1;SPG7;TRAPPC12;UBA3;ZMPSTE24
Upregulated GO terms for genes associated with steatosis	GO:0045785	positive regulation of cell adhesion	0.000315326	43	30	0.697674	8	11770	715	APBB1IP;ITGAV;PRKD2;RHOD;SAA1;TGM2;TMEM102;TPM1
Upregulated GO terms for genes associated with steatosis	GO:0032757	positive regulation of interleukin-8 production	0.000341362	26	17	0.653846	6	11770	715	CALCA;FADD;LBP;MAVS;PRKD2;TLR2
Upregulated GO terms for genes associated with steatosis	GO:0031529	ruffle organization	0.000451336	14	12	0.857143	5	11770	715	CORO1B;CYFIP1;MTOR;PLEKHA1;TPM1
Upregulated GO terms for genes associated with steatosis	GO:0030032	lamellipodium assembly	0.000542981	31	25	0.806452	7	11770	715	ABLIM3;CCDC88A;CYFIP1;GOLPH3;NUP85;RHOD;VAV2
Upregulated GO terms for genes associated with steatosis	GO:0006812	cation transport	0.000696922	29	13	0.448276	5	11770	715	ANO10;ANO6;MCOLN1;PANX2;SLC39A1
Upregulated GO terms for genes associated with steatosis	GO:0018105	peptidyl-serine phosphorylation	0.000876308	103	79	0.76699	13	11770	715	AKT1;ATR;CSNK1G2;MAPK14;MAST3;MKNK1;MTOR;PINK1;PRKACA;PRKD2;UHMK1;ULK1;VRK3
Upregulated GO terms for genes associated with steatosis	GO:0034314	Arp2/3 complex-mediated actin nucleation	0.00103023	18	14	0.777778	5	11770	715	ACTR2;ARPC1A;ARPC1B;ARPC5;ARPC5L
Upregulated GO terms for genes associated with steatosis	GO:0030036	actin cytoskeleton organization	0.00209278	124	97	0.782258	14	11770	715	ABLIM3;ARPC1A;ARPC5;CAP1;CAPZB;CFL1;CORO1B;EPB41;FHL3;FLNB;INF2;IQSEC1;PFN1;PLEK2
Upregulated GO terms for genes associated with steatosis	GO:0006464	cellular protein modification process	0.00389775	93	72	0.774194	11	11770	715	AKT1;FBXO2;ICMT;NAGPA;PARP4;PLOD3;STK38;TTL;UBA3;UBL4A;UEVLD
Upregulated GO terms for genes associated with steatosis	GO:0051092	positive regulation of NF-kappaB transcription factor activity	0.00395216	127	93	0.732283	13	11770	715	CHUK;CIB1;IKBKG;IRAK1;KRAS;PRKD2;RBCK1;RPS6KA4;S100A9;TLR2;TRIM14;TRIM15;TRIM8
Upregulated GO terms for genes associated with steatosis	GO:0031663	lipopolysaccharide-mediated signaling pathway	0.00397328	30	26	0.866667	6	11770	715	AKT1;IRAK1;IRF3;LBP;MAPK14;TLR2
Upregulated GO terms for genes associated with steatosis	GO:0002224	toll-like receptor signaling pathway	0.00433889	109	94	0.862385	13	11770	715	CHUK;CTSB;FADD;IKBKG;IRAK1;IRF3;ITGB2;LBP;LGMN;MAPK14;MAPK9;TLR2;UNC93B1
Upregulated GO terms for genes associated with steatosis	GO:0016042	lipid catabolic process	0.00447244	78	35	0.448718	7	11770	715	ABHD4;DAGLB;PAFAH1B2;PLBD2;PLCB3;PLD3;PNPLA6
Upregulated GO terms for genes associated with steatosis	GO:0055085	transmembrane transport	0.00554828	634	368	0.580442	35	11770	715	ABCC3;ABCC5;ABCD1;ANO10;ANO6;ATP6V0A1;ATP6V0B;ATP6V1A;CLCN3;CLCN7;MCOLN1;MYO5B;NUP85;PANX2;PRKACA;RALBP1;SLC11A1;SLC27A4;SLC29A1;SLC30A6;SLC35A2;SLC35B3;SLC35C1;SLC39A1;SLC39A14;SLC44A1;SLC5A3;SLC8B1;SLC9A8;SLC9B2;STEAP1;TCIRG1;TOMM40L;TTYH3;VDAC3
Upregulated GO terms for genes associated with steatosis	GO:0043087	regulation of GTPase activity	0.00616348	50	37	0.74	7	11770	715	CRK;DYNLT1;MTOR;PLXNB2;RALBP1;RAP1GAP;VAV2
Upregulated GO terms for genes associated with steatosis	GO:0045087	innate immune response	0.00676335	849	577	0.679623	50	11770	715	ACTR2;AGO4;AKT1;ARPC1A;ARPC5;CALCA;CAMK2G;CASP10;CD46;CFL1;CHUK;CRK;CTSB;CYFIP1;DTX4;FADD;FBXO9;IKBKG;IRAK1;IRF3;ITGB2;KRAS;LBP;LGMN;MAPK14;MAPK9;MAVS;MTOR;PIK3CB;PLD2;PRKACA;PSMA5;PSMB2;PSMD10;PSMD13;PSMD3;PSMD4;RPS6KB2;S100A9;SAA1;SLPI;SRPK1;TLR2;TNK1;TRIM14;TRIM15;TRIM8;UBA3;UNC93B1;VAV2
Upregulated GO terms for genes associated with steatosis	GO:0030203	glycosaminoglycan metabolic process	0.00722165	117	78	0.666667	11	11770	715	ABCC5;B3GAT3;B4GALT1;CHPF2;EXT2;GLB1;GNS;HS3ST3B1;SGSH;SLC35B3;ST3GAL4
Upregulated GO terms for genes associated with steatosis	GO:0006810	transport	0.0078633	303	159	0.524752	18	11770	715	ABCC3;ABCC5;ATP6V1A;CACNA1H;CLCN3;CLCN7;LAPTM4B;LDLRAP1;MFSD12;PARP4;RALBP1;SLC25A39;SLC27A4;SLC35F6;SLC5A3;TM9SF2;TMED8;UBL4A
Upregulated GO terms for genes associated with steatosis	GO:0097192	extrinsic apoptotic signaling pathway in absence of ligand	0.00833463	41	30	0.731707	6	11770	715	APPL1;BAK1;BAX;FADD;ITGAV;MKNK1
Upregulated GO terms for genes associated with steatosis	GO:0033209	tumor necrosis factor-mediated signaling pathway	0.0087705	116	91	0.784483	12	11770	715	CHUK;COMMD7;FADD;PSMA5;PSMB2;PSMD10;PSMD13;PSMD3;PSMD4;TNFSF14;TXNDC17;UBA3
Upregulated GO terms for genes associated with steatosis	GO:0030163	protein catabolic process	0.00904189	31	22	0.709677	5	11770	715	AKT1;CLN5;CTSD;MTOR;UCHL3
Upregulated GO terms for genes associated with steatosis	GO:0006468	protein phosphorylation	0.0103387	453	330	0.728477	31	11770	715	ADCK1;ADCK2;AKT1;BCKDK;CALCA;CDC25B;CFL1;CHUK;CSNK1G2;DGUOK;FNIP2;IP6K3;IRAK1;MAP3K11;MAPK9;MKNK1;MTOR;NEK9;PHKB;PHKG2;PIK3CB;PINK1;PRKACA;PRKD2;RPS6KA4;RPS6KB2;SRPK1;STK38;TBRG4;TNK1;ULK1
Upregulated GO terms for genes associated with steatosis	GO:0016477	cell migration	0.0107369	173	128	0.739884	15	11770	715	ARPC5;ASAP3;AVL9;BRAT1;CCDC88A;CD151;CORO1B;GOLPH3;ITGAV;PIK3CB;PTPRF;TNFAIP1;TNK1;VAV2;WWC1
Upregulated GO terms for genes associated with steatosis	GO:1902476	chloride transmembrane transport	0.0114766	91	32	0.351648	6	11770	715	ANO10;ANO6;CLCN3;CLCN7;SLC12A9;TTYH3
Upregulated GO terms for genes associated with steatosis	GO:0051260	protein homooligomerization	0.0127165	173	107	0.618497	13	11770	715	ATG16L1;ATL3;BAX;BID;CHMP4A;IDE;KCTD21;KCTD5;NACC2;SHKBP1;SPAST;TNFAIP1;TOR2A
Upregulated GO terms for genes associated with steatosis	GO:0006418	tRNA aminoacylation for protein translation	0.0132016	42	24	0.571429	5	11770	715	EARS2;HARS2;IARS2;LARS2;PARS2
Upregulated GO terms for genes associated with steatosis	GO:0051701	interaction with host	0.0132016	34	24	0.705882	5	11770	715	ATP6V0A1;ATP6V0B;ATP6V1A;SLC11A1;TCIRG1
Upregulated GO terms for genes associated with steatosis	GO:0006687	glycosphingolipid metabolic process	0.0133254	45	33	0.733333	6	11770	715	ASAH1;BAX;CERK;CPTP;GLB1;PSAP
Upregulated GO terms for genes associated with steatosis	GO:0034142	toll-like receptor 4 signaling pathway	0.0135207	96	85	0.885417	11	11770	715	CHUK;FADD;IKBKG;IRAK1;IRF3;ITGB2;LBP;MAPK14;MAPK9;PIK3AP1;TLR2
Upregulated GO terms for genes associated with steatosis	GO:0046474	glycerophospholipid biosynthetic process	0.0146775	94	64	0.680851	9	11770	715	CEPT1;DGAT2;GNPAT;LPGAT1;PGS1;PLD2;PLD3;PNPLA3;SLC44A1
Upregulated GO terms for genes associated with steatosis	GO:0034220	ion transmembrane transport	0.0147027	268	109	0.406716	13	11770	715	ANO10;ANO6;ATP6V0A1;ATP6V0B;ATP6V1A;CACNA1H;CLCN3;CLCN7;LASP1;MCOLN1;SLC9B2;TCIRG1;TTYH3
Upregulated GO terms for genes associated with steatosis	GO:0005975	carbohydrate metabolic process	0.0168514	337	236	0.700297	23	11770	715	ABCC5;B3GAT3;B4GALT1;CHI3L1;CHPF2;EXT2;GLB1;GNS;HS3ST3B1;IDH2;ME1;NAGPA;NUP85;PARG;PGP;PHKB;PHKG2;PRKACA;SGSH;SLC35B3;ST3GAL4;TKT;UEVLD
Upregulated GO terms for genes associated with steatosis	GO:0007596	blood coagulation	0.016894	486	329	0.676955	30	11770	715	AKT1;ANO6;APBB1IP;CAP1;CAPZB;CFL1;CRK;DAGLB;GNAI2;HDAC1;HMG20B;HPS4;HPS5;HPS6;ITGAV;ITGAX;ITGB2;KRAS;MAPK14;PECAM1;PFN1;PIK3CB;PRKACA;PSAP;RAB27A;SHH;SIRPA;STXBP3;VAV2;VPS45
Upregulated GO terms for genes associated with steatosis	GO:0006665	sphingolipid metabolic process	0.0172372	79	55	0.696203	8	11770	715	ASAH1;CERK;CPTP;CSNK1G2;GLB1;PSAP;SERINC2;SGPL1
Upregulated GO terms for genes associated with steatosis	GO:0019432	triglyceride biosynthetic process	0.0176278	46	35	0.76087	6	11770	715	ACLY;ACSL3;DGAT2;ELOVL1;GK;PNPLA3
Upregulated GO terms for genes associated with steatosis	GO:0038096	Fc-gamma receptor signaling pathway involved in phagocytosis	0.0194138	94	67	0.712766	9	11770	715	ACTR2;ARPC1A;ARPC5;CFL1;CRK;CYFIP1;PIK3CB;PLD2;VAV2
Upregulated GO terms for genes associated with steatosis	GO:0001934	positive regulation of protein phosphorylation	0.0200952	123	90	0.731707	11	11770	715	AKT1;ANXA2;BRAT1;CIB1;DAXX;FAM20A;KRAS;MAPK9;MAVS;MTOR;PINK1
Upregulated GO terms for genes associated with steatosis	GO:0006612	protein targeting to membrane	0.0200999	45	36	0.8	6	11770	715	ATG4A;ICMT;ZDHHC14;ZDHHC2;ZDHHC20;ZDHHC3
Upregulated GO terms for genes associated with steatosis	GO:0055086	nucleobase-containing small molecule metabolic process	0.0212137	78	68	0.871795	9	11770	715	AK1;CDA;DGUOK;GDA;GPX1;GSR;NUDT5;TK2;TYMP
Upregulated GO terms for genes associated with steatosis	GO:0006024	glycosaminoglycan biosynthetic process	0.0215882	42	27	0.642857	5	11770	715	B3GAT3;EXT2;GCNT2;HS3ST3B1;XYLT2
Upregulated GO terms for genes associated with steatosis	GO:0006644	phospholipid metabolic process	0.0220959	168	115	0.684524	13	11770	715	CEPT1;DGAT2;GNPAT;INPP4A;LPGAT1;PGS1;PI4KA;PIK3CB;PLAA;PLD2;PLD3;PNPLA3;SLC44A1
Upregulated GO terms for genes associated with steatosis	GO:0006954	inflammatory response	0.0232508	338	191	0.565089	19	11770	715	AKT1;CALCA;CHI3L1;CHUK;CRP;IKBKG;IL10RB;ITGB2;LYZ;PARP4;PIK3CB;PLAA;PLGRKT;RPS6KA4;S100A9;SERPINA3;SLC11A1;TLR2;TPST1
Upregulated GO terms for genes associated with steatosis	GO:0006904	vesicle docking involved in exocytosis	0.0250067	34	28	0.823529	5	11770	715	RAB15;RAB27A;STXBP2;STXBP3;VPS45
Upregulated GO terms for genes associated with steatosis	GO:0031122	cytoplasmic microtubule organization	0.0250067	32	28	0.875	5	11770	715	CIB1;SPAST;TUBG1;TUBGCP2;TUBGCP3
Upregulated GO terms for genes associated with steatosis	GO:0012501	programmed cell death	0.0255668	158	142	0.898734	15	11770	715	AKT1;APPL1;BAK1;BAX;BCAP31;BID;DBNL;FADD;FNTA;PSMA5;PSMB2;PSMD10;PSMD13;PSMD3;PSMD4
Upregulated GO terms for genes associated with steatosis	GO:0006915	apoptotic process	0.027421	600	454	0.756667	38	11770	715	ADAMTSL4;AKT1;API5;APPL1;BAK1;BAX;BCAP31;BID;BRAT1;CASP10;CASP4;CHI3L1;CIB1;DAXX;DBNL;DRAM2;FADD;FNTA;HTATIP2;IKBKG;IRF3;ITGB2;MAPK14;PDCD6IP;PSMA5;PSMB2;PSMD10;PSMD13;PSMD3;PSMD4;RTKN;RTN3;TCHP;TLR2;TMEM102;TNFAIP1;TNFSF14;TRAF7
Upregulated GO terms for genes associated with steatosis	GO:0033572	transferrin transport	0.0287539	36	29	0.805556	5	11770	715	ATP6V0A1;ATP6V0B;ATP6V1A;MCOLN1;TCIRG1
Upregulated GO terms for genes associated with steatosis	GO:0090382	phagosome maturation	0.0287539	39	29	0.74359	5	11770	715	ATP6V0A1;ATP6V0B;ATP6V1A;SLC11A1;TCIRG1
Upregulated GO terms for genes associated with steatosis	GO:0042590	antigen processing and presentation of exogenous peptide antigen via MHC class I	0.032038	79	73	0.924051	9	11770	715	IFI30;ITGAV;PSMA5;PSMB2;PSMD10;PSMD13;PSMD3;PSMD4;TAPBP
Upregulated GO terms for genes associated with steatosis	GO:0048013	ephrin receptor signaling pathway	0.032038	91	73	0.802198	9	11770	715	ACTR2;AP2A1;ARPC1A;ARPC5;CFL1;CRK;PSEN2;SS18;VAV2
Upregulated GO terms for genes associated with steatosis	GO:0006486	protein glycosylation	0.0328377	63	30	0.47619	5	11770	715	B3GAT3;EXT2;GALNT18;GCNT2;NAGPA
Upregulated GO terms for genes associated with steatosis	GO:0046777	protein autophosphorylation	0.0338666	164	122	0.743902	13	11770	715	AKT1;ATR;CAMK2G;IRAK1;MAP3K11;MAPK14;MKNK1;MTOR;PRKACA;PRKD2;TNK1;UHMK1;ULK1
Upregulated GO terms for genes associated with steatosis	GO:0034138	toll-like receptor 3 signaling pathway	0.0345915	81	74	0.91358	9	11770	715	CHUK;FADD;IKBKG;IRAK1;IRF3;MAPK14;MAPK9;RFTN1;UNC93B1
Upregulated GO terms for genes associated with steatosis	GO:0038061	NIK/NF-kappaB signaling	0.0360047	67	63	0.940299	8	11770	715	CHUK;PSMA5;PSMB2;PSMD10;PSMD13;PSMD3;PSMD4;UBA3
Upregulated GO terms for genes associated with steatosis	GO:0015031	protein transport	0.036824	343	282	0.822157	25	11770	715	ANKRD27;ATG16L1;COG4;EXOC2;GLE1;GORASP1;LMAN2L;MAMDC4;MVP;MYO5B;NUP85;PDCD6IP;PSEN2;SCAMP4;SNX10;SNX14;SNX24;SNX4;SNX7;STXBP2;TOM1;TOMM40L;TTC8;UEVLD;VPS54
Upregulated GO terms for genes associated with steatosis	GO:0032956	regulation of actin cytoskeleton organization	0.0372649	42	31	0.738095	5	11770	715	CCDC88A;CRK;MTOR;SH3BGRL3;TWF2
Upregulated GO terms for genes associated with steatosis	GO:0034644	cellular response to UV	0.0372649	37	31	0.837838	5	11770	715	ATR;BAK1;BAX;MAPK9;POLD1
Upregulated GO terms for genes associated with steatosis	GO:0016485	protein processing	0.03991	56	42	0.75	6	11770	715	ATG4A;FURIN;IDE;PCSK7;PITRM1;PSEN2
Upregulated GO terms for genes associated with steatosis	GO:0006953	acute-phase response	0.0420405	38	32	0.842105	5	11770	715	CRP;LBP;SAA1;SAA2;SERPINA3
Upregulated GO terms for genes associated with steatosis	GO:0016310	phosphorylation	0.0430827	101	77	0.762376	9	11770	715	AKT1;BCKDK;COASY;DOLK;GK;MTOR;PANK4;PINK1;TK2
Upregulated GO terms for genes associated with steatosis	GO:0000045	autophagosome assembly	0.0440971	45	43	0.955556	6	11770	715	ATG16L1;ATG2A;ATG4A;CTSD;ULK1;WIPI2
Upregulated GO terms for genes associated with steatosis	GO:0014070	response to organic cyclic compound	0.0471682	48	33	0.6875	5	11770	715	ACSL3;ANXA7;BAK1;CTSB;PSMB2
Upregulated GO terms for genes associated with steatosis	GO:0044281	small molecule metabolic process	0.0476536	1450	1144	0.788966	83	11770	715	ABCC3;ABCC5;ABCD1;ACLY;ACOX3;ACSL3;AGPS;AK1;AKT1;ASAH1;B3GAT3;B4GALT1;CDA;CEPT1;CERK;CHPF2;CIAO1;COASY;COX15;CPTP;CSNK1G2;CYB5R3;CYP21A2;CYP2R1;DGAT2;DGUOK;ELOVL1;EXT2;FADS1;FADS2;FLAD1;GDA;GK;GLB1;GNB2;GNG10;GNPAT;GNS;GPX1;GSR;GSS;HS3ST3B1;IDH2;INPP4A;IP6K3;KYNU;LGMN;LPGAT1;ME1;MLX;MOCOS;NADSYN1;NUDT3;NUDT5;NUP85;PGS1;PHKB;PHKG2;PI4KA;PIK3CB;PLCB3;PLD2;PLD3;PNPLA3;POLD1;PRKACA;PSAP;PSMA5;PSMB2;P…
Downregulated GO terms for genes associated with steatosis	GO:0071277	cellular response to calcium ion	8.71267e-05	47	32	0.680851	6	11770	277	ADCY1;BRAF;EDN1;FOS;FOSB;JUND
Downregulated GO terms for genes associated with steatosis	GO:0032870	cellular response to hormone stimulus	0.000315178	64	40	0.625	6	11770	277	FOS;FOSB;IGFBP2;JUND;RAMP3;SOCS2
Downregulated GO terms for genes associated with steatosis	GO:0007568	aging	0.00045524	145	97	0.668966	9	11770	277	APOD;CDKN1C;FOS;IGFBP2;JUND;PTH1R;RGN;SOCS2;TIMP3
Downregulated GO terms for genes associated with steatosis	GO:0071456	cellular response to hypoxia	0.00218695	110	77	0.7	7	11770	277	BNIP3;EDN1;FABP1;FAM162A;PPARGC1A;PTN;SIRT1
Downregulated GO terms for genes associated with steatosis	GO:0006805	xenobiotic metabolic process	0.00233573	158	122	0.772152	9	11770	277	ADH1B;ADH1C;CYP1A2;CYP2C19;CYP3A4;CYP3A43;GLYAT;GSTA2;SULT2A1
Downregulated GO terms for genes associated with steatosis	GO:0007268	synaptic transmission	0.00438063	422	134	0.317536	9	11770	277	ADCY1;ADCY5;ANXA9;BRAF;GABBR1;KCNJ8;NCALD;SLC1A2;SLC6A12
Downregulated GO terms for genes associated with steatosis	GO:0006869	lipid transport	0.00676092	68	51	0.75	5	11770	277	ABCA8;ABCA9;APOD;APOF;APOLD1
Downregulated GO terms for genes associated with steatosis	GO:0006936	muscle contraction	0.00928171	101	55	0.544554	5	11770	277	ACTA2;GAMT;MYH11;MYL5;MYL9
Downregulated GO terms for genes associated with steatosis	GO:0000122	negative regulation of transcription from RNA polymerase II promoter	0.00942737	709	479	0.675599	20	11770	277	ACVR2B;CDKN1C;EDN1;EGR1;EPC1;FGFR1;FNIP1;FOSB;HES1;HEY2;ID2;JUND;KLF11;MYC;NFIL3;NFXL1;RYBP;SIRT1;TCEAL1;TCP10L
Downregulated GO terms for genes associated with steatosis	GO:0007623	circadian rhythm	0.0132587	97	60	0.618557	5	11770	277	ADCY1;EGR1;JUND;NFIL3;PPARGC1A
Downregulated GO terms for genes associated with steatosis	GO:0071356	cellular response to tumor necrosis factor	0.0132587	92	60	0.652174	5	11770	277	CCL14;EDN1;PPARGC1A;SIRT1;XCL2
Downregulated GO terms for genes associated with steatosis	GO:0006112	energy reserve metabolic process	0.0141728	100	61	0.61	5	11770	277	ADCY1;ADCY5;MYC;RAPGEF4;SLC25A4
Downregulated GO terms for genes associated with steatosis	GO:0008284	positive regulation of cell proliferation	0.0171539	445	254	0.570787	12	11770	277	CCL14;CNBP;EDN1;FABP1;FGFR1;HES1;LIFR;MYC;PTH1R;PTN;SIRT1;SLC25A33
Downregulated GO terms for genes associated with steatosis	GO:0055114	oxidation-reduction process	0.0219296	571	422	0.739054	17	11770	277	AASS;ACADM;AKR1C4;ALKBH7;BDH1;CYP1A2;CYP2C19;CYP3A4;CYP3A43;CYP4X1;HAAO;HGD;HIGD2A;P4HA1;PHGDH;PHYHD1;SARDH
Downregulated GO terms for genes associated with steatosis	GO:0032496	response to lipopolysaccharide	0.0280057	153	98	0.640523	6	11770	277	CYP1A2;DUSP10;EDN1;FOS;JUND;KCNJ8
Downregulated GO terms for genes associated with steatosis	GO:0007399	nervous system development	0.0351144	272	131	0.481618	7	11770	277	FOS;HES1;MYLIP;NRN1;PTN;SEMA5A;SIAH1
Downregulated GO terms for genes associated with steatosis	GO:0042493	response to drug	0.0482662	308	201	0.652597	9	11770	277	ADCY1;APOD;FOS;FOSB;IGFBP2;JUND;MYC;PTN;SLC1A2
Upregulated GO terms for genes associated with fibrosis	GO:0007596	blood coagulation	7.17424e-08	486	329	0.676955	41	11770	594	ACTN1;ANO6;ATP2A3;CAP1;CAPZB;CDC42;EHD1;GNA12;GNAI2;GNB1;HDAC1;HGF;HPS4;ITGA5;ITGAM;ITGAV;KIF3B;KIFAP3;LCP2;LYN;MAPK1;PDE9A;PHF21A;PIK3CB;PLAU;PPBP;PRKCD;PRKCE;PSAP;RAC1;RAC2;RCOR1;SELPLG;SIRPA;STXBP3;TGFB1;TGFB3;THBS1;TIMP1;WDR1;YWHAZ
Upregulated GO terms for genes associated with fibrosis	GO:0030198	extracellular matrix organization	5.89801e-07	308	185	0.600649	27	11770	594	ACTN1;ADAM8;AGRN;B4GALT1;COL5A2;COLGALT1;CSGALNACT1;DDR1;ICAM1;ITGA5;ITGAM;ITGAV;LAMB3;MFAP3;MMP14;MMP9;MPZL3;NFKB2;PLOD2;PSEN1;PXDN;TGFB1;TGFB3;TGFBI;THBS1;TIMP1;TNFRSF11B
Upregulated GO terms for genes associated with fibrosis	GO:0038096	Fc-gamma receptor signaling pathway involved in phagocytosis	8.83759e-07	94	67	0.712766	15	11770	594	ABI1;ACTR2;ARPC5;CDC42;LIMK1;LYN;MAPK1;MYO10;MYO1C;NCKAP1L;PIK3CB;PRKCD;PRKCE;RAC1;WASF2
Upregulated GO terms for genes associated with fibrosis	GO:0030036	actin cytoskeleton organization	1.39805e-06	124	97	0.782258	18	11770	594	ARHGEF18;ARPC5;CAP1;CAPZB;CDC42;DOCK2;FGD3;FHL3;FLNB;FSCN1;IQSEC1;LIMK1;PAFAH1B1;PDLIM7;PIP5K1C;RAC1;RHOU;WASF2
Upregulated GO terms for genes associated with fibrosis	GO:0007165	signal transduction	1.6354e-06	982	577	0.587576	56	11770	594	AGRN;APPL2;CANT1;CAP1;CDC42SE2;CLCN6;CREB1;CSNK1G2;CXCL6;DLL4;DNM2;DOK1;FLNB;FST;GAPVD1;GNAI2;GNB1;IFNGR1;IL10RB;IL7R;KIFAP3;LIMK1;LPXN;LSP1;LTB;LYN;MAPK1;MICAL1;OPTN;PDE9A;PI4KB;PIK3CB;PIK3CD;PKN1;PLAA;PLAU;PRKCD;PRKCE;PXN;RAC2;RALB;RALBP1;RASA2;RPS6KA1;RPS6KC1;SCARF1;SH3BP1;SNX27;TFG;TMEM102;TNFRSF11B;TRAF2;ULK1;VOPP1;YWHAZ;ZFYVE16
Upregulated GO terms for genes associated with fibrosis	GO:0030168	platelet activation	1.69625e-06	213	161	0.755869	24	11770	594	ACTN1;CAP1;GNA12;GNAI2;GNB1;HGF;LCP2;LYN;MAPK1;PIK3CB;PIK3CD;PPBP;PRKCD;PRKCE;PSAP;RAC1;RAC2;STXBP3;TGFB1;TGFB3;THBS1;TIMP1;WDR1;YWHAZ
Upregulated GO terms for genes associated with fibrosis	GO:0006661	phosphatidylinositol biosynthetic process	2.51197e-06	56	47	0.839286	12	11770	594	ARF3;INPPL1;MTMR6;PI4K2A;PI4KB;PIK3CB;PIK3CD;PIKFYVE;PIP4K2B;PIP5K1C;SACM1L;SLC27A1
Upregulated GO terms for genes associated with fibrosis	GO:0035556	intracellular signal transduction	3.67826e-06	362	227	0.627072	29	11770	594	AKAP11;CAB39;DAPK3;DVL3;GMIP;GNAI2;GSK3B;HCLS1;JAK1;JAK3;LCP2;MAPK13;MARK2;PIKFYVE;PIP4K2B;PLCB3;PLEKHM3;PRKCE;PRKD2;PSEN1;RAC1;RPS6KA1;SH3BP5L;SS18;STK38;STK38L;TLK2;TRAF3IP2;TULP4
Upregulated GO terms for genes associated with fibrosis	GO:0006468	protein phosphorylation	2.52051e-05	453	330	0.728477	35	11770	594	BIRC6;CCNK;CDK8;CREB1;CSNK1G2;DAPK3;DYRK2;GSK3B;ILK;IRAK2;JAK1;JAK3;LIMK1;LIMK2;LYN;MAP3K1;MAPK1;MARK2;MARK4;NRBP1;PIK3CB;PIK3CD;PKN1;PRKCD;PRKCE;PRKD2;RPS6KA1;RPS6KC1;SCYL2;STK11;STK38;STK38L;TGFB1;TLK2;ULK1
Upregulated GO terms for genes associated with fibrosis	GO:0007155	cell adhesion	2.62279e-05	420	213	0.507143	26	11770	594	ACHE;APC;B4GALT1;DDR1;DGCR2;ICAM1;INPPL1;ITGA5;ITGAM;ITGAV;LAMB3;LOXL2;LPXN;MAEA;MPZL3;NEO1;PRKCE;PRKD2;PXN;RAC1;SCARB2;SCARF1;SELPLG;SIRPA;TGFBI;THBS1
Upregulated GO terms for genes associated with fibrosis	GO:0046854	phosphatidylinositol phosphorylation	3.79295e-05	35	27	0.771429	8	11770	594	IP6K2;PI4K2A;PI4KB;PIK3CB;PIK3CD;PIKFYVE;PIP4K2B;PIP5K1C
Upregulated GO terms for genes associated with fibrosis	GO:0008360	regulation of cell shape	6.11467e-05	133	104	0.781955	16	11770	594	ARAP1;ARHGEF18;CDC42SE2;CSNK1G2;DAPK3;FGD3;FMNL1;GNA12;ICAM1;MSN;MYH9;MYO10;PRPF40A;PXN;RHOU;SH3KBP1
Upregulated GO terms for genes associated with fibrosis	GO:0010592	positive regulation of lamellipodium assembly	0.000115351	14	11	0.785714	5	11770	594	DNM2;FSCN1;RAC1;RAC2;WASF2
Upregulated GO terms for genes associated with fibrosis	GO:0035987	endodermal cell differentiation	0.000177509	27	18	0.666667	6	11770	594	INHBA;ITGA5;ITGAV;LAMB3;MMP14;MMP9
Upregulated GO terms for genes associated with fibrosis	GO:0016477	cell migration	0.000234028	173	128	0.739884	17	11770	594	APC;ARPC5;AVL9;BTG1;FSCN1;GSK3B;ITGAV;JAK1;JAK3;KCTD13;LCP1;NDE1;PIK3CB;PPP1R9B;PRPF40A;SH3KBP1;THBS1
Upregulated GO terms for genes associated with fibrosis	GO:0030335	positive regulation of cell migration	0.000329355	148	108	0.72973	15	11770	594	APC;DAPK3;HGF;ILK;ITGAV;LYN;MAPK1;MMP14;MYO1C;NUMB;PIK3CD;RRAS2;TGFB1;THBS1;TRIM32
Upregulated GO terms for genes associated with fibrosis	GO:0050852	T cell receptor signaling pathway	0.000344723	97	75	0.773196	12	11770	594	LCP2;MAPK1;PDE4B;PIK3CB;PIK3CD;PRKD2;PSEN1;RFTN1;STK11;TNFRSF21;UBE2V1;VASP
Upregulated GO terms for genes associated with fibrosis	GO:0050900	leukocyte migration	0.000351896	114	86	0.754386	13	11770	594	B4GALT1;ICAM1;ITGA5;ITGAM;ITGAV;LYN;MMP9;MSN;MYH9;PDE4B;PIK3CB;SELPLG;SIRPA
Upregulated GO terms for genes associated with fibrosis	GO:0006897	endocytosis	0.000364553	138	109	0.789855	15	11770	594	CSNK1G2;DNM2;EHD1;FKBP15;GAPVD1;INPPL1;LRP10;MICALL1;NECAP2;RAB22A;RALBP1;SH3KBP1;SNX18;TOM1;UNC119
Upregulated GO terms for genes associated with fibrosis	GO:0045785	positive regulation of cell adhesion	0.000592491	43	30	0.697674	7	11770	594	ADAM8;APC;ITGAV;LDB1;PRKD2;TMEM102;TPM1
Upregulated GO terms for genes associated with fibrosis	GO:0002576	platelet degranulation	0.000622763	83	69	0.831325	11	11770	594	ACTN1;CAP1;HGF;LYN;PPBP;PSAP;TGFB1;TGFB3;THBS1;TIMP1;WDR1
Upregulated GO terms for genes associated with fibrosis	GO:0007411	axon guidance	0.000772857	533	334	0.626642	31	11770	594	ACTR2;AGRN;APH1B;ARPC5;CAP1;CDC42;COL5A2;CREB1;DPYSL3;GSK3B;ITGA5;ITGAV;JAK1;JAK3;LIMK1;LYN;MAPK1;MARK3;MMP9;MYH9;MYO10;NEO1;NUMB;PIP5K1C;PLXND1;RAC1;RAC2;RASA2;RASAL3;RPS6KA1;VASP
Upregulated GO terms for genes associated with fibrosis	GO:0008285	negative regulation of cell proliferation	0.000803688	385	263	0.683117	26	11770	594	ABI1;APC;ASPH;B4GALT1;BAK1;BTG1;DDR1;DLL4;INHBA;INPPL1;JARID2;KIFAP3;LYN;NOTCH2;NUP62;PDS5B;PML;REST;RUNX1;SOX4;STK11;TBRG1;TGFB1;TGFB3;TMEM127;TP53I11
Upregulated GO terms for genes associated with fibrosis	GO:0010800	positive regulation of peptidyl-threonine phosphorylation	0.000883167	25	16	0.64	5	11770	594	CAB39;GSK3B;MAPK1;S1PR2;TGFB1
Upregulated GO terms for genes associated with fibrosis	GO:0048013	ephrin receptor signaling pathway	0.00101258	91	73	0.802198	11	11770	594	ACTR2;APH1B;ARPC5;CDC42;LIMK1;LYN;MMP9;MYH9;RAC1;SIPA1L1;SS18
Upregulated GO terms for genes associated with fibrosis	GO:0007050	cell cycle arrest	0.00113619	141	109	0.77305	14	11770	594	AK1;APC;CAB39;ILK;INHBA;MACF1;NOTCH2;PML;PPP1R9B;SKIL;STK11;TBRG1;TGFB1;THBS1
Upregulated GO terms for genes associated with fibrosis	GO:0001782	B cell homeostasis	0.0015928	23	18	0.782609	5	11770	594	BAK1;LYN;NCKAP1L;PIK3CD;PKN1
Upregulated GO terms for genes associated with fibrosis	GO:0051491	positive regulation of filopodium assembly	0.0015928	25	18	0.72	5	11770	594	AGRN;ARAP1;DPYSL3;FSCN1;TGFB3
Upregulated GO terms for genes associated with fibrosis	GO:0007010	cytoskeleton organization	0.00176316	107	78	0.728972	11	11770	594	AVIL;CAPZB;FGD3;MAEA;MICAL1;PRPF40A;PXN;RHOU;SH3KBP1;TPM1;ZMYM4
Upregulated GO terms for genes associated with fibrosis	GO:0006644	phospholipid metabolic process	0.00191243	168	115	0.684524	14	11770	594	ACHE;ARF3;INPPL1;LPCAT1;MTMR6;PI4K2A;PI4KB;PIK3CB;PIK3CD;PIKFYVE;PIP4K2B;PIP5K1C;PLAA;SACM1L
Upregulated GO terms for genes associated with fibrosis	GO:0016197	endosomal transport	0.00204992	69	57	0.826087	9	11770	594	ABCA1;AP5Z1;LRBA;SNX18;SNX27;STAM2;TOM1;VPS4B;ZFYVE16
Upregulated GO terms for genes associated with fibrosis	GO:0045773	positive regulation of axon extension	0.00207292	28	19	0.678571	5	11770	594	GSK3B;ILK;LIMK1;MACF1;PAFAH1B1
Upregulated GO terms for genes associated with fibrosis	GO:0060070	canonical Wnt signaling pathway	0.00253092	84	48	0.571429	8	11770	594	APC;CDC42;DVL3;GSK3B;PSEN1;SOX4;STK11;TBL1XR1
Upregulated GO terms for genes associated with fibrosis	GO:0070588	calcium ion transmembrane transport	0.00253092	132	48	0.363636	8	11770	594	ANO6;ASPH;ATP2A3;ITGAV;PANX1;PSEN1;STIM2;TRPC4AP
Upregulated GO terms for genes associated with fibrosis	GO:0043547	positive regulation of GTPase activity	0.00257246	472	345	0.730932	30	11770	594	ACAP2;AGRN;ANKRD27;ARAP1;ARHGAP30;ARHGEF1;ARHGEF18;CYTH4;DOCK2;FGD3;GAPVD1;GIT2;GMIP;GSK3B;ICAM1;IQSEC1;LIMS1;LLGL1;NCKAP1L;RALBP1;RASA2;RASAL3;RGP1;RGS3;RIC8A;SH3BP1;SNX18;STXBP5;TBC1D13;TBC1D22A
Upregulated GO terms for genes associated with fibrosis	GO:0006821	chloride transport	0.0026506	37	20	0.540541	5	11770	594	ANO10;ANO6;CLCN6;SLC26A6;TTYH3
Upregulated GO terms for genes associated with fibrosis	GO:0045732	positive regulation of protein catabolic process	0.00289402	58	49	0.844828	8	11770	594	APC;EGLN2;FZR1;GSK3B;LPCAT1;NSF;SNX1;TRIM32
Upregulated GO terms for genes associated with fibrosis	GO:0010811	positive regulation of cell-substrate adhesion	0.0033365	36	21	0.583333	5	11770	594	LIMS1;PRKCE;RAC1;RELL2;THBS1
Upregulated GO terms for genes associated with fibrosis	GO:0050853	B cell receptor signaling pathway	0.0033365	31	21	0.677419	5	11770	594	LYN;MAPK1;NCKAP1L;PIK3CD;RFTN1
Upregulated GO terms for genes associated with fibrosis	GO:0070527	platelet aggregation	0.00338665	39	30	0.769231	6	11770	594	FIBP;ILK;MYH9;PIK3CB;PIP5K1C;STXBP3
Upregulated GO terms for genes associated with fibrosis	GO:0007264	small GTPase mediated signal transduction	0.00410512	639	434	0.679186	35	11770	594	ABI1;ACTR2;ARAP1;ARF3;ARHGAP30;ARHGEF18;ARPC5;CDC42;CKAP5;DOCK2;FGD3;FMNL1;GMIP;JAK1;JAK3;LIMK1;MAPK1;MARK3;MYH9;NCKAP1L;NDE1;NKIRAS2;PAFAH1B1;PKN1;RAC1;RAC2;RALBP1;RANBP2;RASA2;RASAL3;RHOU;RRAD;WASF2;YWHAZ;ZW10
Upregulated GO terms for genes associated with fibrosis	GO:0030217	T cell differentiation	0.00414131	31	22	0.709677	5	11770	594	DLL4;IL7R;PIK3CD;SOX4;SP3
Upregulated GO terms for genes associated with fibrosis	GO:0051056	regulation of small GTPase mediated signal transduction	0.00441791	134	100	0.746269	12	11770	594	ARAP1;ARHGAP30;ARHGEF18;CDC42;FGD3;GMIP;RAC1;RAC2;RALBP1;RALGAPB;RHOU;SIPA1L1
Upregulated GO terms for genes associated with fibrosis	GO:1902476	chloride transmembrane transport	0.00474513	91	32	0.351648	6	11770	594	ANO10;ANO6;CLCN3;CLCN7;SLC26A6;TTYH3
Upregulated GO terms for genes associated with fibrosis	GO:0051017	actin filament bundle assembly	0.00507565	26	23	0.884615	5	11770	594	ACTN1;CDC42;DPYSL3;FSCN1;LCP1
Upregulated GO terms for genes associated with fibrosis	GO:0007219	Notch signaling pathway	0.00513767	162	128	0.790123	14	11770	594	APH1B;B4GALT1;CDK8;CREB1;DLL4;DTX2;E2F3;HDAC1;HDAC7;NOTCH2;NUMB;PSEN1;TBL1XR1;TGFB1
Upregulated GO terms for genes associated with fibrosis	GO:0043065	positive regulation of apoptotic process	0.00553973	280	213	0.760714	20	11770	594	ANO6;APAF1;APC;APH1B;ARHGEF18;BAK1;DAPK3;DNM2;FGD3;IP6K2;PHLDA1;PNMA1;PSEN1;RAC1;REST;SOX4;SUDS3;TGFB1;TGFB3;UBD
Upregulated GO terms for genes associated with fibrosis	GO:0030838	positive regulation of actin filament polymerization	0.00555737	43	33	0.767442	6	11770	594	ICAM1;MAP3K1;NCKAP1L;PRKCE;RAC1;VASP
Upregulated GO terms for genes associated with fibrosis	GO:0022617	extracellular matrix disassembly	0.00564628	117	66	0.564103	9	11770	594	ADAM8;COL5A2;LAMB3;LCP1;MMP14;MMP9;PSEN1;SH3PXD2B;TIMP1
Upregulated GO terms for genes associated with fibrosis	GO:0030203	glycosaminoglycan metabolic process	0.00565214	117	78	0.666667	10	11770	594	AGRN;B4GALT1;CHST1;CHST15;CSGALNACT1;CSGALNACT2;GALNS;GNS;HS3ST3B1;SGSH
Upregulated GO terms for genes associated with fibrosis	GO:0018105	peptidyl-serine phosphorylation	0.00618761	103	79	0.76699	10	11770	594	CSNK1G2;GSK3B;ILK;MAPK1;MAPK13;PRKCE;PRKD2;TLK2;TNKS;ULK1
Upregulated GO terms for genes associated with fibrosis	GO:0042493	response to drug	0.00629787	308	201	0.652597	19	11770	594	AACS;ADD3;BAK1;CREB1;DVL3;GNA12;GRK5;ICAM1;INHBA;LCN2;LYN;MTHFR;NCKAP1L;RPN2;SNX27;SS18;TGFB1;THBS1;TNFRSF11B
Upregulated GO terms for genes associated with fibrosis	GO:0007032	endosome organization	0.00737454	31	25	0.806452	5	11770	594	RAB22A;RAB5B;TMEM127;USP8;VPS4B
Upregulated GO terms for genes associated with fibrosis	GO:0006935	chemotaxis	0.00745554	118	57	0.483051	8	11770	594	CXCL6;DOCK2;LSP1;MAPK1;NCKAP1L;PIK3CB;PLAU;RALBP1
Upregulated GO terms for genes associated with fibrosis	GO:0007169	transmembrane receptor protein tyrosine kinase signaling pathway	0.00745554	93	57	0.612903	8	11770	594	ABI1;DOK1;JAK1;JAK3;LCP2;LYN;MPZL1;PIK3CB
Upregulated GO terms for genes associated with fibrosis	GO:0007268	synaptic transmission	0.00766804	422	134	0.317536	14	11770	594	ACHE;AGRN;CREB1;DNAJC5;GNAI2;GNB1;KCNAB2;MAPK1;NSF;PAFAH1B1;PANX1;PLCB3;RPS6KA1;UNC119
Upregulated GO terms for genes associated with fibrosis	GO:0015031	protein transport	0.00855715	343	282	0.822157	24	11770	594	AFTPH;ANKRD27;AP5Z1;ARF3;ATG9A;CHMP1B;EXOC2;MVP;MYH9;MYO5B;NECAP2;PDCD6IP;PLEKHA8;PSEN1;RAB11FIP1;SCAMP4;STXBP2;STXBP5;TNKS;TOM1;VPS4B;VPS54;YIPF5;ZW10
Upregulated GO terms for genes associated with fibrosis	GO:0034220	ion transmembrane transport	0.00875836	268	109	0.406716	12	11770	594	ANO10;ANO6;ASPH;ATP2A3;ATP6V1A;CLCN3;CLCN6;CLCN7;LASP1;SFXN3;TRPC4AP;TTYH3
Upregulated GO terms for genes associated with fibrosis	GO:0031663	lipopolysaccharide-mediated signaling pathway	0.00875924	30	26	0.866667	5	11770	594	IRAK2;LYN;MAPK1;PRKCE;TGFB1
Upregulated GO terms for genes associated with fibrosis	GO:0070059	intrinsic apoptotic signaling pathway in response to endoplasmic reticulum stress	0.00875924	34	26	0.764706	5	11770	594	APAF1;BAK1;GSK3B;PML;TRAF2
Upregulated GO terms for genes associated with fibrosis	GO:0008284	positive regulation of cell proliferation	0.00949395	445	254	0.570787	22	11770	594	BIRC6;CACUL1;E2F3;FZR1;GNAI2;GRK5;HCLS1;HDAC1;HGF;ILK;ITGAV;LYN;MAPK1;OPTN;OSMR;PLAU;RAC2;S1PR2;SOX4;SUZ12;TGFB1;TIMP1
Upregulated GO terms for genes associated with fibrosis	GO:0034097	response to cytokine	0.00983963	52	37	0.711538	6	11770	594	NFKB2;OSMR;PML;SKIL;TIMP1;TMEM102
Upregulated GO terms for genes associated with fibrosis	GO:0034162	toll-like receptor 9 signaling pathway	0.0122546	71	62	0.873239	8	11770	594	CREB1;IRAK2;MAP3K1;MAPK1;NFKB2;RPS6KA1;TNIP2;UBE2V1
Upregulated GO terms for genes associated with fibrosis	GO:0002244	hematopoietic progenitor cell differentiation	0.0143069	63	40	0.634921	6	11770	594	FST;INHBA;KCNAB2;PSEN1;REST;TGFB1
Upregulated GO terms for genes associated with fibrosis	GO:0034134	toll-like receptor 2 signaling pathway	0.0147005	72	64	0.888889	8	11770	594	CREB1;IRAK2;MAP3K1;MAPK1;NFKB2;RPS6KA1;TNIP2;UBE2V1
Upregulated GO terms for genes associated with fibrosis	GO:0016567	protein ubiquitination	0.0150227	353	265	0.750708	22	11770	594	BIRC6;CAND1;CBL;CDC42;CDK8;DTX2;FBXL19;FEM1B;KCTD13;MID2;RFWD3;RNF121;RNF213;RNF34;SPOPL;TRAF7;TRIM11;TRIM32;TRPC4AP;TULP4;UBA1;UBD
Upregulated GO terms for genes associated with fibrosis	GO:0030308	negative regulation of cell growth	0.0150325	121	90	0.743802	10	11770	594	BMPR2;BTG1;CRLF3;INHBA;IP6K2;PML;PPP1R9B;RRAD;STK11;TGFB1
Upregulated GO terms for genes associated with fibrosis	GO:0019886	antigen processing and presentation of exogenous peptide antigen via MHC class II	0.0174829	93	66	0.709677	8	11770	594	AP1B1;DCTN1;DCTN5;DNM2;DYNC1H1;KIF3B;KIFAP3;LGMN
Upregulated GO terms for genes associated with fibrosis	GO:0010976	positive regulation of neuron projection development	0.0181694	76	54	0.710526	7	11770	594	AVIL;CBFA2T2;DPYSL3;LYN;MARK2;NEU1;SCARF1
Upregulated GO terms for genes associated with fibrosis	GO:0051092	positive regulation of NF-kappaB transcription factor activity	0.0185795	127	93	0.732283	10	11770	594	ADAM8;ICAM1;IRAK2;MID2;NFKB2;PRKD2;TGFB1;TRAF2;TRIM32;UBE2V1
Upregulated GO terms for genes associated with fibrosis	GO:0006886	intracellular protein transport	0.0198001	231	195	0.844156	17	11770	594	AP1B1;AP3M2;COPB1;COPB2;EHD1;GGA2;NSF;RAB22A;RAB24;RAB32;RAB5B;SNX1;SNX18;SNX27;STAM2;STX16;TOM1
Upregulated GO terms for genes associated with fibrosis	GO:0034329	cell junction assembly	0.0200208	77	43	0.558442	6	11770	594	ACTN1;ILK;LAMB3;LIMS1;PXN;VASP
Upregulated GO terms for genes associated with fibrosis	GO:0048010	vascular endothelial growth factor receptor signaling pathway	0.0205169	280	211	0.753571	18	11770	594	ABI1;BMPR2;CDC42;ITGAV;JAK1;JAK3;MAPK1;MAPK13;MARK3;NCKAP1L;PIK3CB;PRKCD;PRKD2;PXN;RAC1;RASA2;RASAL3;WASF2
Upregulated GO terms for genes associated with fibrosis	GO:0006928	movement of cell or subcellular component	0.0206248	87	68	0.781609	8	11770	594	ABI1;ACTR2;ARPC5;CAPZB;LSP1;MSN;RAC1;TPM1
Upregulated GO terms for genes associated with fibrosis	GO:0034146	toll-like receptor 5 signaling pathway	0.0218369	64	56	0.875	7	11770	594	CREB1;IRAK2;MAP3K1;MAPK1;NFKB2;RPS6KA1;UBE2V1
Upregulated GO terms for genes associated with fibrosis	GO:0034166	toll-like receptor 10 signaling pathway	0.0218369	64	56	0.875	7	11770	594	CREB1;IRAK2;MAP3K1;MAPK1;NFKB2;RPS6KA1;UBE2V1
Upregulated GO terms for genes associated with fibrosis	GO:0061024	membrane organization	0.0233292	159	139	0.874214	13	11770	594	AP1B1;COPB1;COPB2;DNM2;EXOC2;KIF3B;KIFAP3;MYO1C;RALGAPB;STAM2;STXBP3;VPS4B;YWHAZ
Upregulated GO terms for genes associated with fibrosis	GO:0000902	cell morphogenesis	0.0236775	51	33	0.647059	5	11770	594	ADAM8;CAPZB;FRYL;IL7R;SS18
Upregulated GO terms for genes associated with fibrosis	GO:0042059	negative regulation of epidermal growth factor receptor signaling pathway	0.0236775	35	33	0.942857	5	11770	594	CBL;CDC42;NUP62;SH3KBP1;STAM2
Upregulated GO terms for genes associated with fibrosis	GO:0045087	innate immune response	0.0252976	849	577	0.679623	40	11770	594	ABI1;ACTR2;ARPC5;ATG9A;CDC42;CREB1;GSK3B;IRAK2;ITGAM;JAK1;JAK3;LCN2;LCP2;LGMN;LIMK1;LYN;MAP3K1;MAPK1;MARK3;MID2;MYO10;MYO1C;NCKAP1L;NFKB2;OTUD5;PANX1;PIK3CB;PIK3CD;PML;PRKCD;PRKCE;RAC1;RASA2;RASAL3;RPS6KA1;TRAF2;TRIM11;TRIM32;UBE2V1;WASF2
Upregulated GO terms for genes associated with fibrosis	GO:0007015	actin filament organization	0.0266449	55	34	0.618182	5	11770	594	ACTN1;DBN1;INPPL1;PPP1R9B;RAC2
Upregulated GO terms for genes associated with fibrosis	GO:0030593	neutrophil chemotaxis	0.0266449	63	34	0.539683	5	11770	594	ITGAM;NCKAP1L;PDE4B;PIK3CD;PIP5K1C
Upregulated GO terms for genes associated with fibrosis	GO:0060326	cell chemotaxis	0.0266449	48	34	0.708333	5	11770	594	CXCL6;HGF;PIK3CB;PPBP;PRKCD
Upregulated GO terms for genes associated with fibrosis	GO:0051028	mRNA transport	0.0271149	59	46	0.779661	6	11770	594	MVP;MYO1C;NUP62;RANBP2;TNKS;XPO7
Upregulated GO terms for genes associated with fibrosis	GO:0007179	transforming growth factor beta receptor signaling pathway	0.0272495	132	113	0.856061	11	11770	594	ARHGEF18;CBL;CDK8;CREB1;HDAC1;MAP3K1;PML;PXN;SKIL;TGFB1;TGFB3
Upregulated GO terms for genes associated with fibrosis	GO:0006325	chromatin organization	0.0274248	259	172	0.664093	15	11770	594	CHD4;EED;HDAC1;KANSL3;KDM5B;PHF21A;RCOR1;REST;SETD2;SUDS3;SUPT20H;SUPT7L;SUZ12;TBL1XR1;USP22
Upregulated GO terms for genes associated with fibrosis	GO:0042147	retrograde transport, endosome to Golgi	0.0326668	60	48	0.8	6	11770	594	DCTN1;PIKFYVE;RGP1;SNX1;STX16;VPS54
Upregulated GO terms for genes associated with fibrosis	GO:0050731	positive regulation of peptidyl-tyrosine phosphorylation	0.0356999	81	49	0.604938	6	11770	594	HCLS1;HGF;ICAM1;ITGA5;STK11;TGFB1
Upregulated GO terms for genes associated with fibrosis	GO:0002250	adaptive immune response	0.0358369	134	62	0.462687	7	11770	594	JAK3;LYN;PIK3CB;PIK3CD;PRKD2;RNF19B;TNFRSF21
Upregulated GO terms for genes associated with fibrosis	GO:0038123	toll-like receptor TLR1:TLR2 signaling pathway	0.0358369	70	62	0.885714	7	11770	594	CREB1;IRAK2;MAP3K1;MAPK1;NFKB2;RPS6KA1;UBE2V1
Upregulated GO terms for genes associated with fibrosis	GO:0038124	toll-like receptor TLR6:TLR2 signaling pathway	0.0358369	70	62	0.885714	7	11770	594	CREB1;IRAK2;MAP3K1;MAPK1;NFKB2;RPS6KA1;UBE2V1
Upregulated GO terms for genes associated with fibrosis	GO:0042787	protein ubiquitination involved in ubiquitin-dependent protein catabolic process	0.0358369	72	62	0.861111	7	11770	594	ANKIB1;BFAR;CACUL1;RNF19B;RNF34;TRIM32;UBE2Z
Upregulated GO terms for genes associated with fibrosis	GO:0043161	proteasome-mediated ubiquitin-dependent protein catabolic process	0.0382126	173	134	0.774566	12	11770	594	BFAR;FBXL19;KCTD13;PML;RNF216;RNF34;SPOPL;TBL1XR1;USP22;USP32;USP48;USP8
Upregulated GO terms for genes associated with fibrosis	GO:0007049	cell cycle	0.0417942	187	151	0.807487	13	11770	594	APEX2;APPL2;GNAI2;MAEA;MAPK1;MAPK13;POC5;PRKCD;PRKCE;PRPF40A;RPS6KA1;TLK2;USP22
Upregulated GO terms for genes associated with fibrosis	GO:0010629	negative regulation of gene expression	0.0424344	115	78	0.678261	8	11770	594	BAK1;CDC42;DLL4;HDAC1;INPPL1;REST;TGFB1;ZNF148
Upregulated GO terms for genes associated with fibrosis	GO:0002755	MyD88-dependent toll-like receptor signaling pathway	0.0446575	79	65	0.822785	7	11770	594	CREB1;IRAK2;MAP3K1;MAPK1;NFKB2;RPS6KA1;UBE2V1
Upregulated GO terms for genes associated with fibrosis	GO:0033138	positive regulation of peptidyl-serine phosphorylation	0.0458598	74	52	0.702703	6	11770	594	CAB39;CDC42;GSK3B;HCLS1;PRKD2;TGFB1
Upregulated GO terms for genes associated with fibrosis	GO:0008152	metabolic process	0.0471652	441	265	0.600907	20	11770	594	ABHD17C;ATP2A3;COLGALT1;DDX52;DDX60L;DPYSL3;DYNC1H1;GNA12;GNAI2;KIF3B;KIFC3;MACF1;MYO10;MYO1C;MYO5B;NSF;RAC1;RAC2;RALB;RHOU
Upregulated GO terms for genes associated with fibrosis	GO:0002224	toll-like receptor signaling pathway	0.0473311	109	94	0.862385	9	11770	594	CREB1;IRAK2;ITGAM;LGMN;MAP3K1;MAPK1;NFKB2;RPS6KA1;UBE2V1
Upregulated GO terms for genes associated with fibrosis	GO:0007283	spermatogenesis	0.0476795	368	154	0.418478	13	11770	594	ATRX;BTG1;DNM2;LIMK2;NUP62;PAFAH1B2;PLAU;SGPL1;SKIL;TDRD7;UBR2;WDR48;WFDC2
Downregulatec GO terms for genes associated with fibrosis	GO:0044281	small molecule metabolic process	0	1450	1144	0.788966	148	11770	657	AADAT;AASS;ABCG2;ABCG5;ABCG8;ACAA1;ACADM;ACADS;ACADSB;ACMSD;ACOX2;ACY3;ADAL;ADCY1;ADH1B;ADH1C;ADH4;ADH6;ADHFE1;ADI1;AGXT;AHCY;AKR1C4;AKR7A2;AKR7A3;ALAD;ALDH7A1;AMACR;APOA1;APOC3;ARG1;ASS1;BAAT;BCKDHB;BDH1;CA14;CA5A;CDO1;COQ5;COX5B;COX7C;CRLS1;CTH;CYB5A;CYP1A2;CYP2C19;CYP2C8;CYP2E1;CYP2U1;CYP3A4;CYP3A43;CYP3A5;CYP4A11;DDC;DPYD;DUT;ECI1;ENPP1;EPHX2;ERCC2;ETFB;ETFDH;ETNK2;FABP1;FH;FTCD;GALK1;GAMT;GC…
Downregulatec GO terms for genes associated with fibrosis	GO:0055114	oxidation-reduction process	0	571	422	0.739054	78	11770	657	AASS;ACADM;ADHFE1;ADI1;AGMO;AKR1C4;AKR7A2;AKR7A3;ALDH1L1;ALDH7A1;ALKBH7;ASPDH;BCKDHB;BDH1;CCS;CDO1;CHCHD4;CRYL1;CYB5A;CYP1A2;CYP2C19;CYP2C8;CYP2E1;CYP2U1;CYP3A4;CYP3A43;CYP4A11;CYP4A22;CYP4X1;DCXR;DHRS1;DHRS11;DHRS4;DHRS4L2;DMGDH;DPYD;ECSIT;FADS6;FMO5;GLRX5;GPX4;GRHPR;GSTZ1;HAAO;HGD;HIBADH;HIGD2A;HSD11B2;HSD17B10;HSD17B14;HSD17B8;KDM8;L2HGDH;LDHD;MAOA;MAOB;MGST2;MSRB2;MTHFD1;PAH;PCBD1;PCBD2;PECR;…
Downregulatec GO terms for genes associated with fibrosis	GO:0034641	cellular nitrogen compound metabolic process	1.58318e-13	187	156	0.834225	36	11770	657	AADAT;AASS;ACADSB;ACMSD;ADI1;AGXT;AHCY;ALDH7A1;ARG1;ASS1;BCKDHB;CDO1;CTH;DDC;FTCD;GAMT;GCDH;GPT;GRHPR;GSTZ1;HAAO;HAO1;HGD;HIBADH;HSD17B10;IVD;MAT1A;OAT;PAH;PCBD1;PHGDH;QDPR;SLC25A15;TAT;TDO2;TST
Downregulatec GO terms for genes associated with fibrosis	GO:0006805	xenobiotic metabolic process	3.03169e-12	158	122	0.772152	30	11770	657	ACY3;ADH1B;ADH1C;ADH4;ADH6;AHCY;AKR7A2;AKR7A3;CYP1A2;CYP2C19;CYP2C8;CYP2E1;CYP2U1;CYP3A4;CYP3A43;CYP3A5;CYP4A11;EPHX2;GLYAT;GSTA2;GSTM4;GSTZ1;MAOA;MAOB;MAT1A;MGST2;NAT1;RORC;SULT1E1;SULT2A1
Downregulatec GO terms for genes associated with fibrosis	GO:0022904	respiratory electron transport chain	3.6518e-07	100	81	0.81	18	11770	657	ALDH5A1;COX5B;COX7C;ETFB;ETFDH;NDUFA1;NDUFA11;NDUFA2;NDUFA4;NDUFB2;NDUFB5;NDUFB7;NDUFS4;NDUFS5;NDUFS7;PPARGC1A;SDHD;UQCRQ
Downregulatec GO terms for genes associated with fibrosis	GO:0044237	cellular metabolic process	7.0303e-07	131	111	0.847328	21	11770	657	ADHFE1;COX5B;COX7C;ETFB;ETFDH;FH;L2HGDH;MPC1;NDUFA1;NDUFA11;NDUFA2;NDUFA4;NDUFB2;NDUFB5;NDUFB7;NDUFS4;NDUFS5;NDUFS7;PDK2;SDHD;UQCRQ
Downregulatec GO terms for genes associated with fibrosis	GO:0006559	L-phenylalanine catabolic process	7.52166e-07	10	8	0.8	6	11770	657	GSTZ1;HGD;PAH;PCBD1;QDPR;TAT
Downregulatec GO terms for genes associated with fibrosis	GO:0017144	drug metabolic process	6.59594e-06	29	26	0.896552	9	11770	657	ADAL;CYP1A2;CYP2C19;CYP2C8;CYP2E1;CYP3A4;EPHX2;FMO5;PCK1
Downregulatec GO terms for genes associated with fibrosis	GO:0033539	fatty acid beta-oxidation using acyl-CoA dehydrogenase	1.20139e-05	17	16	0.941176	7	11770	657	ACADM;ACADS;ACADSB;ACOX2;ETFDH;GCDH;IVD
Downregulatec GO terms for genes associated with fibrosis	GO:0015721	bile acid and bile salt transport	4.56584e-05	26	19	0.730769	7	11770	657	AKR1C4;BAAT;NR1H4;SLC10A1;SLC10A5;SLC27A5;SLCO1B3
Downregulatec GO terms for genes associated with fibrosis	GO:0097267	omega-hydroxylase P450 pathway	5.57297e-05	9	9	1	5	11770	657	CYP1A2;CYP2C19;CYP2C8;CYP2U1;CYP4A11
Downregulatec GO terms for genes associated with fibrosis	GO:0008206	bile acid metabolic process	5.72342e-05	40	33	0.825	9	11770	657	ACAA1;ACOX2;AKR1C4;AMACR;BAAT;NR1H4;SLC10A1;SLC27A5;SLCO1B3
Downregulatec GO terms for genes associated with fibrosis	GO:0042738	exogenous drug catabolic process	9.58466e-05	22	15	0.681818	6	11770	657	CYP1A2;CYP2C19;CYP2C8;CYP2E1;CYP2U1;CYP3A4
Downregulatec GO terms for genes associated with fibrosis	GO:0019373	epoxygenase P450 pathway	0.000146146	19	16	0.842105	6	11770	657	CYP1A2;CYP2C19;CYP2C8;CYP2E1;CYP4A11;EPHX2
Downregulatec GO terms for genes associated with fibrosis	GO:0006120	mitochondrial electron transport, NADH to ubiquinone	0.000151039	39	37	0.948718	9	11770	657	NDUFA1;NDUFA2;NDUFA4;NDUFB2;NDUFB5;NDUFB7;NDUFS4;NDUFS5;NDUFS7
Downregulatec GO terms for genes associated with fibrosis	GO:0006631	fatty acid metabolic process	0.000232759	51	39	0.764706	9	11770	657	ACADSB;ACSM2A;ACSM5;ALKBH7;ANGPTL3;BAAT;CRYL1;CYP4A11;ECHDC2
Downregulatec GO terms for genes associated with fibrosis	GO:0051384	response to glucocorticoid	0.000260028	75	48	0.64	10	11770	657	ACADS;AGXT;ALAD;BCHE;CDO1;DUSP1;HSD11B2;LCAT;PFKFB1;TAT
Downregulatec GO terms for genes associated with fibrosis	GO:0006635	fatty acid beta-oxidation	0.000287281	37	32	0.864865	8	11770	657	ACAA1;ACADM;ACADS;ECH1;ECI1;HADH;MCEE;PEX7
Downregulatec GO terms for genes associated with fibrosis	GO:0006730	one-carbon metabolic process	0.000428702	30	19	0.633333	6	11770	657	AHCY;ALDH1L1;CA5A;GNMT;MAT1A;MTHFD1
Downregulatec GO terms for genes associated with fibrosis	GO:0071392	cellular response to estradiol stimulus	0.000471822	22	13	0.590909	5	11770	657	CRHBP;ESR1;GPER1;RAMP3;SSTR1
Downregulatec GO terms for genes associated with fibrosis	GO:0008202	steroid metabolic process	0.000507108	61	43	0.704918	9	11770	657	AKR1C4;CYP2C19;CYP2E1;CYP3A4;CYP3A5;DHRS4;HSD11B2;SULT1E1;SULT2A1
Downregulatec GO terms for genes associated with fibrosis	GO:0008209	androgen metabolic process	0.000700419	16	14	0.875	5	11770	657	AKR1C4;CYP3A4;ESR1;HSD17B8;PPARGC1A
Downregulatec GO terms for genes associated with fibrosis	GO:0070328	triglyceride homeostasis	0.000779071	25	21	0.84	6	11770	657	ACSM2A;ANGPTL3;APOA1;APOC3;APOC4;MLXIPL
Downregulatec GO terms for genes associated with fibrosis	GO:0051289	protein homotetramerization	0.000853	58	46	0.793103	9	11770	657	ACADS;ACOT13;ALDH5A1;CTH;DCXR;GNMT;HSD17B10;PCBD1;PCBD2
Downregulatec GO terms for genes associated with fibrosis	GO:0034375	high-density lipoprotein particle remodeling	0.00100271	15	15	1	5	11770	657	APOA1;APOC1;APOC3;APOM;LCAT
Downregulatec GO terms for genes associated with fibrosis	GO:0000096	sulfur amino acid metabolic process	0.00131718	25	23	0.92	6	11770	657	ADI1;AHCY;CDO1;CTH;MAT1A;TST
Downregulatec GO terms for genes associated with fibrosis	GO:0033344	cholesterol efflux	0.00131718	27	23	0.851852	6	11770	657	ABCG5;ABCG8;APOA1;APOC1;APOC3;APOM
Downregulatec GO terms for genes associated with fibrosis	GO:0007588	excretion	0.00139205	39	16	0.410256	5	11770	657	ABCG5;ABCG8;GRHPR;GUCA2B;NEDD4L
Downregulatec GO terms for genes associated with fibrosis	GO:0032259	methylation	0.00186471	90	61	0.677778	10	11770	657	AHCY;ALDH1L1;AS3MT;COQ5;CYP1A2;GAMT;GNMT;MAT1A;METTL7A;NSUN6
Downregulatec GO terms for genes associated with fibrosis	GO:0009083	branched-chain amino acid catabolic process	0.00188238	18	17	0.944444	5	11770	657	ACADSB;BCKDHB;HIBADH;HSD17B10;IVD
Downregulatec GO terms for genes associated with fibrosis	GO:0042157	lipoprotein metabolic process	0.00195474	37	33	0.891892	7	11770	657	APOA1;APOC1;APOC3;APOM;LCAT;LPA;MTTP
Downregulatec GO terms for genes associated with fibrosis	GO:0055088	lipid homeostasis	0.00195474	36	33	0.916667	7	11770	657	ACADM;ACADS;ACADSB;ACOX2;ANGPTL3;GCDH;IVD
Downregulatec GO terms for genes associated with fibrosis	GO:0044255	cellular lipid metabolic process	0.00217897	150	129	0.86	16	11770	657	ACAA1;ACADM;ACADS;ACOX2;AMACR;APOA1;BDH1;CYP4A11;ECI1;FABP1;HADH;HMGCS2;MCEE;MLYCD;PHYH;SULT2A1
Downregulatec GO terms for genes associated with fibrosis	GO:0007584	response to nutrient	0.00242256	75	53	0.706667	9	11770	657	ABCG5;ABCG8;AHCY;APOA1;ASS1;HMGCS2;POR;SSTR1;TXN2
Downregulatec GO terms for genes associated with fibrosis	GO:0006699	bile acid biosynthetic process	0.00248801	21	18	0.857143	5	11770	657	ACOX2;AKR1C4;AMACR;BAAT;SLC27A5
Downregulatec GO terms for genes associated with fibrosis	GO:0045471	response to ethanol	0.00276644	97	54	0.556701	9	11770	657	ADH6;ALAD;CDO1;CYP2E1;EGR1;HMGCS2;MAOB;MGMT;SOD1
Downregulatec GO terms for genes associated with fibrosis	GO:0000302	response to reactive oxygen species	0.00319248	34	27	0.794118	6	11770	657	ATOX1;CCS;PRDX6;SOD1;TXN2;TXNRD2
Downregulatec GO terms for genes associated with fibrosis	GO:0051591	response to cAMP	0.00330324	51	36	0.705882	7	11770	657	AGXT;CDO1;DUSP1;FOS;HMGCS2;NDUFS4;PFKFB1
Downregulatec GO terms for genes associated with fibrosis	GO:0042632	cholesterol homeostasis	0.00403401	64	57	0.890625	9	11770	657	ABCG5;ABCG8;ANGPTL3;APOA1;APOC3;APOM;EPHX2;HPN;LCAT
Downregulatec GO terms for genes associated with fibrosis	GO:0046686	response to cadmium ion	0.00410338	22	20	0.909091	5	11770	657	ALAD;ARG1;CAMK2B;CYB5A;HAAO
Downregulatec GO terms for genes associated with fibrosis	GO:0006979	response to oxidative stress	0.00425779	98	79	0.806122	11	11770	657	ALAD;ATOX1;DUSP1;ERCC2;ETFDH;GPX4;HAO1;MSRB2;PRDX6;SCARA3;TAT
Downregulatec GO terms for genes associated with fibrosis	GO:0019369	arachidonic acid metabolic process	0.00453414	53	38	0.716981	7	11770	657	CYP1A2;CYP2C19;CYP2C8;CYP2U1;CYP4A11;EPHX2;GPX4
Downregulatec GO terms for genes associated with fibrosis	GO:0006091	generation of precursor metabolites and energy	0.00608267	52	40	0.769231	7	11770	657	COX6A2;COX7C;ENPP1;GYS2;PHKA1;SLC25A4;XYLB
Downregulatec GO terms for genes associated with fibrosis	GO:0006520	cellular amino acid metabolic process	0.0111664	30	25	0.833333	5	11770	657	DDC;GCAT;MAT1A;QDPR;SLC25A15
Downregulatec GO terms for genes associated with fibrosis	GO:0001523	retinoid metabolic process	0.013732	60	36	0.6	6	11770	657	ADH4;AKR1C4;APOA1;APOC3;APOM;RARRES2
Downregulatec GO terms for genes associated with fibrosis	GO:0042493	response to drug	0.0171328	308	201	0.652597	19	11770	657	ABCG2;ABCG5;ABCG8;ADCY1;ADRA1A;ALAD;APOA1;ARG1;ASS1;BCHE;FOS;HADH;HMGCS2;HSD11B2;MAOB;MGMT;POR;SOD1;TXN2
Downregulatec GO terms for genes associated with fibrosis	GO:0042594	response to starvation	0.0180037	37	28	0.756757	5	11770	657	ACADS;HMGCS2;PFKFB1;PPARGC1A;SSTR1
Downregulatec GO terms for genes associated with fibrosis	GO:0009636	response to toxic substance	0.0194559	83	61	0.73494	8	11770	657	EPHX2;FOS;GLYAT;MAOB;MGMT;MPST;PON1;PON3
Downregulatec GO terms for genes associated with fibrosis	GO:1902600	hydrogen ion transmembrane transport	0.0199851	58	39	0.672414	6	11770	657	COX5B;COX6A2;COX7C;CYB5A;NDUFA4;UQCRQ
Downregulatec GO terms for genes associated with fibrosis	GO:0006749	glutathione metabolic process	0.0207838	45	29	0.644444	5	11770	657	ALDH5A1;GSTA2;GSTM4;GSTZ1;SOD1
Downregulatec GO terms for genes associated with fibrosis	GO:0006869	lipid transport	0.0223134	68	51	0.75	7	11770	657	ABCA6;ABCA9;APOC4;APOF;LPA;MTTP;SIGMAR1
Downregulatec GO terms for genes associated with fibrosis	GO:0043401	steroid hormone mediated signaling pathway	0.0224384	56	40	0.714286	6	11770	657	ESR1;GPER1;NR0B2;NR1H4;NR1I3;RORC
Downregulatec GO terms for genes associated with fibrosis	GO:0006633	fatty acid biosynthetic process	0.0238296	40	30	0.75	5	11770	657	AGMO;FADS6;HSD17B8;MLYCD;PECR
Downregulatec GO terms for genes associated with fibrosis	GO:0071356	cellular response to tumor necrosis factor	0.0486304	92	60	0.652174	7	11770	657	ASS1;CCL14;CCL16;CCL23;CRHBP;GPER1;PPARGC1A
