# Supplementary material for: Global molecular landscape of early MASLD progression in human obesity
Source: eLife. 2026 Mar 23;14:RP109534. doi: 10.7554/eLife.109534 (PMC13008360; doi:10.7554/eLife.109534)
Supplement: Supplementary file 9. [file elife-109534-supp9.xlsx]

## Sheet: Sheet1
Fibosis-specific upregulated genes	Fibosis-specific downregulated genes	Steatosis-specific upregulated genes	Steatosis-specific downregulated genes
ANKIB1	COPZ2	M6PR	MYLIP
MARK4	PDK2	UPF1	CYP3A43
PAFAH1B1	ETV1	GDE1	DNAJC25
JARID2	PNPLA4	TTC22	OAT
NCAPD2	MPND	ELAC2	FGFR1
CLCN6	STAB1	LYPLA2	FBLN1
RNF216	USP2	SLC25A39	EDN1
MAMLD1	GUCA2B	MVP	MYNN
VEZT	AKR7A2	CAPN1	RAPGEF4
RAI14	CAMK2B	COX15	SIRT1
LCP2	SLC9A3R2	SLC11A1	GADD45B
TBC1D22A	NTHL1	SPAST	CCNB1IP1
TRAF3IP2	PHKA1	TYMP	MID1
MXD1	LIMS2	BAK1	NCALD
QSER1	JADE1	GRN	ZNF175
HDAC7	ZCWPW1	ATP6V0A1	ASPA
ELAVL1	L2HGDH	TSPAN17	PPARGC1A
TP53BP1	ANKRD24	MRPS10	SLC1A2
AP3M2	MRPS33	H6PD	RSRC2
WDR1	SORBS1	TRAPPC3	SMOC2
MARK2	FKBP5	ATP9A	FAM162A
P4HA2	OCEL1	YIPF1	GBE1
ATP2A3	ATP5F1D	PARP12	ACVR2B
SCARF1	IGFALS	DGAT2	EEF1B2
FNDC3B	NDUFB7	POLD1	IGFBP2
FSCN1	UPB1	EPN1	GADD45A
KIFAP3	TXN2	ADCK1	BCAS2
LRCH4	GSTZ1	SNX24	CA14
GPR137B	PCK2	BTBD1	LGALSL
GNB1	MROH8	HMG20B	IFIT2
MID2	AHCY	ME1	EPC1
PSEN1	PIN4	ELOVL1	SOCS2
PDS5B	MLYCD	COASY	RASL11A
REST	FCGRT	RAB27A	P4HA1
ZW10	SHD	ELP1	NR4A1
ACHE	ARMC6	PTPN3	MCEE
ANKRD10	HIBADH	SLC44A1	NRN1
DNAAF9	PHYH	AP1M1	VIL1
GMIP	GALK1	CDHR2	DNAJB9
RCOR1	SULT1E1	VPS9D1	CDKN1C
ICAM1	ZBTB16	MOCOS	RAI2
USP48	ACOT13	REXO2	MYC
DTX2	PEX7	RAP1GAP	CNPY3
MAP3K1	ADGRG6	APBB1IP	FXYD6
WASHC2A	BCHE	C5orf22	RASGEF1B
FBXL19	HEMK1	ZMPSTE24	ENPEP
MED15	ARHGEF26	MAPRE3	RGS5
SH3BP1	NDUFS7	ATG16L1	DUSP10
PIK3IP1	HSPE1	POMGNT1	CSRNP1
SPTLC2	RMDN2	SNX10	UGCG
SUSD6	FAAH	ACOX3	SLC25A25
MMP9	KLF9	BAX	SLC25A4
WFDC2	KBTBD7	PTPN4	ING1
HSDL1	ADRA1A	ASAP3	DGKE
GGA2	ECHDC2	SMOX	BRAF
KCTD9	ACADS	SLC8B1	CIART
MAN2B1	EBPL	LYZ	PTH1R
RASAL3	GNMT	CMTM6	NUAK2
ANKRD27	TMEM53	SRPK1	RPL22L1
TGFB1	COX7C	MAST3	RYBP
JAK3	CHTF18	KLHL22	LZTFL1
GSDME	DGCR6L	RTCB	NFIL3
PLEKHA8	MPST	CYB5R3	TRPV6
SFXN3	GAMT	AP1B1	BEX3
XPNPEP1	ECSIT	PNPLA3	HIC2
UNC119	APOC1	KIAA0930	NFXL1
KLF3	GADD45G	RANGAP1	SLC25A33
LPXN	NDUFA2	DESI1	KLF11
PANX1	NR0B2	LGMN	MRGPRF
CBL	CLEC10A	DHRS7	ADCY5
CAND1	LYVE1	PRORP	KDF1
RAB5B	IAH1	GSS	BNIP3
GNPTAB	ATP5MC2	RAB5IF	ERN1
PPARD	BLOC1S1	ISM1	DIPK2A
ZNF451	PPP1R1A	RPRD1B	PAQR7
PCDH12	COX5B	ATG4A	RBM33
DPYSL3	RABEPK	ABCD1	ARMCX2
TFG	C11orf1	PLS3	MAFF
STAM2	GCHFR	RBBP7	TCEAL9
NRBP1	GIPC2	UBL4A	IFIT1
DOK1	RBP5	CD99L2	ANKRD37
LRRC42	GRTP1	PARP4	CYP4X1
QSOX1	SSTR1	CLN5	FAM221A
RNF19B	TOB1	PHKB	PAX8-AS1
RHOU	SKAP1	USB1	SIAH1
KDM5B	SAT2	COG4	CNGA1
RPS6KA1	ASGR1	PLA2G15	GABBR1
CREB1	SOD1	NAGPA	FNIP1
FKBP15	C1orf162	CIAO3	SNHG15
TGFB3	NR1I3	EARS2	FAM133B
AFTPH	MRPL24	CD276	LINC01702
CCDC77	CCDC150	ZDHHC2	CDRT4
ZMIZ2	ALDH1L1	NIPAL2	PSMA3-AS1
INHBA	IQGAP2	GSDMD	PRANCR
PLAU	MLIP	ASAH1	LINC00641
SPATS2	IDNK	CLPTM1	GOLGA4-AS1
BTN2A2	MAT1A	MED25
SOX4	MBIP	VRK3
RAP2A	DDAH1	PIAS4
FGD3	SORBS2	PLIN3
TRAF2	ATP5PF	BRAT1
PTPN12	SH3RF2	PLOD3
DLL4	DHRS4	TRIM14
COPB1	PFKFB1	AK1
XPO7	DUSP23	PLGRKT
PXDN	CES5A	HPS1
LSP1	FTCD	PLEKHA1
OSBPL2	PPP1R16A	PITRM1
ZSWIM4	PRPSAP1	WNT3
FAM104A	CYP4A22	PFN1
BTG1	HAAO	CPD
LOXL2	PPM1L	SMARCD2
NOTCH2	RTP3	PEX12
AVIL	KLF15	MLX
CAB39	NDUFS4	ABCC3
SCYL2	CMYA5	FAM20A
DRAM1	UQCRQ	KLHL2
ABHD17C	ADCY1	STIM2
ABI1	GPER1	KLHL5
ASCC1	FMC1	HTATIP2
APH1B	CYP2C19	VWA5A
RGS3	BORCS7	DTX4
ETV6	CENPV	UNC93B1
PHLDA1	ATF7IP2	CALCA
POC1B	RCCD1	TCIRG1
PML	FN3K	MANSC1
EFL1	ATP5PD	CMAS
SLC39A6	RAB4A	GCNT2
RERE	GLYCTK	MAPK14
SNX27	MPLKIP	FBXO9
SPOPL	FAM107A	SAYSD1
EAF1	NDUFS5	SLC29A1
MYO10	ATP5ME	MAN2A1
YIPF5	VXN	WWC1
TNFRSF21	NPR1	CYB561D2
ZMYM4	MT1E	SNX4
TLK2	DCXR	ABTB1
SH3KBP1	TM4SF4	GORASP1
CSGALNACT1	TMEM192	ABCC5
NSD3	CMTM8	LMAN2L
PLCB3	MGMT	RTKN
ADAM8	LSM3	TTL
PLOD2	RBKS	FNDC4
LPCAT1	TMEM126A	SNX17
PI4K2A	TTC36	GCA
RASA2	MRPL57	CCDC88A
SAMD8	LRFN4	FBXO6
RAB11FIP1	NET1	MAD2L2
MAPK13	ZNF497	GNPAT
NECAP2	NDUFA11	KLHL12
MMP14	MBLAC2	RAB29
CDC42SE2	ATOX1	CD46
UBE2Z	COX14	PRDX1
RUNX1	LBX2	CTSD
PCSK7	TPPP2	UCHL3
ANO10	WDR97	GDA
FAM102B	C11orf71	CPSF3
SLC30A7	GREM2	PTPA
ZNF148	ARL6IP4	NEK9
STARD4	FES	IDE
GRPEL2	GLRX5	LRP11
STXBP5	FAM104B	TGFBI
TNFRSF11B	NAA38	ANXA11
OSGIN2	TXNRD2	CISD1
GTF2A1	PTRHD1	GIPC1
INPPL1	SIGIRR	LPGAT1
SGPL1	NRBP2	COQ8B
ILK	PIGP	SLPI
RRAD	ANKRD46	PEX6
IRGQ	MT1X	MED20
DAPK3	DHRS4L2	KLHDC3
RFWD3	TMEM120A	SLC35B3
ZSWIM1	MAOA	EMC3
FEM1B	FHIT	TMTC4
PTPN9	SDHAF3	TM9SF2
LUZP1	ANKRD35	NUP85
LIMS1	ZNF511	TNFSF14
CSGALNACT2	NUDT16	RBCK1
CANT1	SMOC1	MKKS
PIK3CD	LIME1	MGME1
WASHC2C	TCEA3	PSMB2
DCP2	HSD17B8	HECTD3
SP3	APOM	TUBGCP3
SH3PXD2B	MIR1915HG	IRF3
KCTD13	MRPL53	WDR24
PACS1	TMEM256	MTX2
SH3BP5L	DNAJC19	PLD2
YPEL2	SELENOH	CD68
CHST1	EMP2	TXNDC17
PDE4DIP	FIS1	TEP1
SNX18	AS3MT	PGAP6
SETD2	TMEM242	LBP
MEX3D	CEBPD	CDC16
RFX7	LINC01124	NSUN5
CHST15	TRAM2-AS1	COLGALT1
TTC3	HORMAD2-AS1	ARPC1B
CCBE1	LINC01806	MPP1
KIAA2026	THAP7-AS1	TUBG1
COPB2	PET117	VPS25
PDE4B	LINC02532	CHD1L
SEPTIN9	LINC01554	CC2D1A
PCGF3	HOGA1	EFR3A
PIP5K1C	TCP10L	WBP2
LAMB3	GSTA2	TRIM47
MYO1C	ZBED5-AS1	FLOT2
MPZL1	SMIM20	ERAL1
SIRPA	LINC02499	ANKEF1
ZKSCAN8	GPR162	DAP3
ASPH	PRODH2	CRP
LDB1	SNHG21	FBXO44
SLC5A3	KBTBD11-AS1	CHI3L1
TMEM184B	TOLLIP-DT	RTN3
RUNDC1	SLC25A21-AS1	ADCK2
GRK5	FOXN3-AS1	MEN1
DAXX	SERTM2	PTGFRN
COL5A2	MRPL12	CEPT1
DDR1	FXYD1	SAA2
NUP62	CEBPA-DT	ACP2
UBD	RASL10B	AGO4
LTB	FGF14-AS2	TPGS2
OR2I1P	CISD3	OSTF1
COX19	DHRS11	CEMIP2
ZNF224		GOLM1
NBPF26		SNX14
		DYSF
		CPM
		NPL
		TBRG4
		DBNL
		CCM2
		VPS45
		TMOD1
		ARPC5L
		PPIL1
		SQOR
		LOXL4
		ANXA7
		PARP16
		GIT2
		ESYT1
		SLC38A6
		RAB15
		FURIN
		PARN
		GALNT1
		RETREG3
		SAMD1
		DPP9
		AKT1
		RNPEPL1
		EFHD2
		KIAA0319L
		PTPRF
		PSMA5
		ADAMTSL4
		SMYD2
		GALNT2
		PARP1
		PSEN2
		VPS54
		CIAO1
		UBA3
		DYNLT1
		TMEM181
		TRAPPC14
		SLC12A9
		MSN
		HDAC8
		CAMK2G
		FADS1
		EML3
		B3GAT3
		COMMD7
		UEVLD
		PLBD2
		FAM177A1
		VIPAS39
		TMEM45B
		CACUL1
		GLT1D1
		UHMK1
		FARP1
		TMEM87B
		SLC25A28
		DRAM2
		PCDH1
		PHKG2
		FCSK
		APPL1
		LDLRAP1
		BABAM2
		CNOT11
		GDPD5
		CDA
		PINK1
		TOMM40L
		CYB5R1
		AMFR
		RRP1B
		VAV2
		TOR2A
		SHKBP1
		FLAD1
		MGAT4B
		MFSD12
		JOSD2
		IP6K3
		TBC1D24
		CYB561A3
		ASRGL1
		PARS2
		SNX7
		DENND2D
		FCAMR
		S100A9
		ZDHHC3
		TKT
		RFT1
		SLC9B2
		APEH
		RNF123
		AGGF1
		DAGLB
		STEAP1
		SHH
		DNAAF5
		KDM1B
		ZCCHC24
		TTC8
		NUDT5
		ENOX2
		METTL17
		HTRA1
		HPS6
		WBP1L
		TK2
		PLEKHA7
		BMERB1
		SLC27A4
		MYO5B
		ZNF641
		HDGFL2
		FAM234A
		KCTD5
		REEP4
		SERINC2
		LDLRAD4
		VAMP5
		APEX2
		TPST1
		GLB1
		SMAGP
		TRABD
		TRIM8
		LRRC8D
		TRAPPC12
		CORO1B
		LRRC20
		TMCC1
		RHOD
		ABLIM3
		SYT12
		MAP3K11
		SAA1
		CNP
		TNK1
		SNHG11
		ZDHHC14
		ATR
		DOLK
		PHYKPL
		RPS6KB2
		RNPEP
		SLC38A9
		ACAD9
		AGTRAP
		CD151
		MAMDC4
		CENPBD1P
		STAP2
		CYBC1
		H2BC4
		TMEM102
		SLC35C1
		IDH2
		TMEM259
		PTTG1IP
		CMTM4
		PGP
		IRAK1
		ATL3
		CIB1
		TLCD2
		CYP2R1
		S100A16
		JPT1
		C8orf76
		SERPINA3
		TMEM63A
		WDR5
		MAN2A2
		CACNA1H
		SULF2
		PLXNB2
		CASP4
		S100A10
		MTOR
		TGM2
		INF2
		MRPL38
		SKIC2
		ABHD16A
		TRIM15
		PRR13
		GPX3
		CHUK
		NUDT19
		NAXD
		TSPAN4
		VPS16
		IFI30
		CPTP
		PARG
		CYP21A2
		TAPBP
		GPX1
		ZC3H12A-DT
		ARPC1A
		GNG10
		STMP1
		IL10RB
		TWF2
		CHMP4A
		DPP3
		IKBKG
		NUDT3
