# Supplementary material for: Global molecular landscape of early MASLD progression in human obesity
Source: eLife. 2026 Mar 23;14:RP109534. doi: 10.7554/eLife.109534 (PMC13008360; doi:10.7554/eLife.109534)
Supplement: Supplementary file 10. [file elife-109534-supp10.xlsx]

## Sheet: test_diabeticsubgroup_2
Gene stable ID	HGNC symbol	Gene description	NCBI gene (formerly Entrezgene) ID	coef_Steatosis	pval_Steatosis	qval_Steatosis	pwr_Steatosis	coef_Fibrosis	pval_Fibrosis	qval_Fibrosis	pwr_Fibrosis	coef_Steatosis_Nondiabetic	pval_Steatosis_Nondiabetic	qval_Steatosis_Nondiabetic	pwr_Steatosis_Nondiabetic	coef_Fibrosis_Nondiabetic	pval_Fibrosis_Nondiabetic	qval_Fibrosis_Nondiabetic	pwr_Fibrosis_Nondiabetic	coef_Steatosis_Diabetic	pval_Steatosis_Diabetic	qval_Steatosis_Diabetic	pwr_Steatosis_Diabetic	coef_Fibrosis_Diabetic	pval_Fibrosis_Diabetic	qval_Fibrosis_Diabetic	pwr_Fibrosis_Diabetic	log2FC	pval	qval	Diabetic MASLD signatures
ENSG00000167286	CD3D	CD3 delta subunit of T-cell receptor complex [Source:HGNC Symbol;Acc:HGNC:1673]	915	-0.0117599	0.919677	0.577377	0.051173	0.234767	0.0394777	0.0803399	0.55193	-0.119249	0.386863	0.493049	0.140485	0.077939	0.598356	0.652558	0.0826896	-0.0697512	0.821176	0.846477	0.0560366	0.457363	0.0528592	0.116286	0.542782	0.682933	0.0024043	0.583038
ENSG00000161281	COX7A1	cytochrome c oxidase subunit 7A1 [Source:HGNC Symbol;Acc:HGNC:2287]	1346	-0.0777367	0.518605	0.446435	0.099362	-0.167034	0.159092	0.17254	0.295117	-0.108755	0.442826	0.51338	0.120634	-0.213052	0.15845	0.438644	0.297337	-0.304068	0.217068	0.652148	0.247936	-0.266821	0.177418	0.208333	0.288546	0.663413	0.0340591	0.583038
ENSG00000107317	PTGDS	prostaglandin D2 synthase [Source:HGNC Symbol;Acc:HGNC:9592]	5730	-0.0993213	0.407707	0.399181	0.132311	0.022428	0.850387	0.451773	0.0541121	-0.169936	0.225508	0.402102	0.231549	-0.182025	0.225761	0.486638	0.231346	0.0318697	0.912964	0.860059	0.0514062	0.244487	0.290852	0.268218	0.192387	0.609143	0.0273886	0.583038
ENSG00000115380	EFEMP1	EGF containing fibulin extracellular matrix protein 1 [Source:HGNC Symbol;Acc:HGNC:3218]	2202	-0.0127187	0.913446	0.575767	0.051363	0.158293	0.169258	0.179214	0.28348	-0.114094	0.414523	0.504079	0.130151	0.0268905	0.857931	0.726731	0.0537104	0.192797	0.526495	0.789458	0.0988805	0.417672	0.0770449	0.13673	0.464699	0.604327	0.00309991	0.583038
ENSG00000160593	JAML	junction adhesion molecule like [Source:HGNC Symbol;Acc:HGNC:19084]	120425	0.046039	0.691102	0.510616	0.0684083	0.24205	0.0325161	0.0725573	0.584177	-0.123718	0.367882	0.483848	0.148242	-0.042479	0.773589	0.70921	0.0596197	0.198216	0.496968	0.781169	0.106489	0.491985	0.0260056	0.0869409	0.676905	0.594097	0.0018096	0.583038
ENSG00000198851	CD3E	CD3 epsilon subunit of T-cell receptor complex [Source:HGNC Symbol;Acc:HGNC:1674]	916	0.0343127	0.772095	0.537379	0.0597298	0.277715	0.0160476	0.050954	0.689796	-0.144172	0.302557	0.450662	0.179995	0.00490178	0.974014	0.754466	0.0501226	0.22682	0.457112	0.765243	0.118165	0.583067	0.00990248	0.0632209	0.819516	0.573777	0.00501966	0.583038
ENSG00000137077	CCL21	C-C motif chemokine ligand 21 [Source:HGNC Symbol;Acc:HGNC:10620]	6366	-0.0361535	0.762657	0.535045	0.0605833	0.143964	0.222352	0.208613	0.233186	-0.149168	0.282954	0.440146	0.191391	-0.063939	0.668761	0.677819	0.07143	0.169473	0.561622	0.798922	0.0908381	0.445236	0.0466349	0.110494	0.567901	0.570392	0.0361689	0.583038
ENSG00000213145	CRIP1	cysteine rich protein 1 [Source:HGNC Symbol;Acc:HGNC:2360]	1396	0.0103872	0.931325	0.580327	0.0508565	0.199787	0.0912446	0.125596	0.400576	-0.132314	0.346892	0.476797	0.157527	-0.0160671	0.915403	0.740812	0.0513045	0.239445	0.426423	0.757373	0.12842	0.517099	0.0233221	0.0829188	0.695493	0.538004	0.00535295	0.583038
ENSG00000100985	MMP9	matrix metallopeptidase 9 [Source:HGNC Symbol;Acc:HGNC:7176]	4318	0.1418	0.224096	0.298209	0.231776	0.354054	0.00168384	0.0182995	0.899774	0.158829	0.250217	0.418586	0.21288	0.252793	0.0857556	0.37561	0.414926	-0.046305	0.872992	0.85631	0.053012	0.5379	0.0119635	0.0667457	0.795628	0.52721	0.109193	0.583038
ENSG00000130300	PLVAP	plasmalemma vesicle associated protein [Source:HGNC Symbol;Acc:HGNC:13635]	83483	0.0895067	0.455755	0.421388	0.116393	0.281426	0.016152	0.050954	0.688916	-0.0126324	0.928692	0.668018	0.0509256	0.208148	0.165757	0.443407	0.288781	0.533243	0.0518066	0.476582	0.546849	0.488204	0.0246712	0.0846019	0.68597	0.514366	0.00976401	0.583038
ENSG00000166482	MFAP4	microfibril associated protein 4 [Source:HGNC Symbol;Acc:HGNC:7035]	4239	-0.134287	0.262384	0.323147	0.20379	0.0690247	0.561386	0.355149	0.0897781	-0.203251	0.147639	0.342682	0.310805	-0.0566777	0.708444	0.692651	0.0663209	0.0303839	0.921345	0.860893	0.0511473	0.33372	0.167099	0.201504	0.300881	0.511577	0.0197045	0.583038
ENSG00000255529	POLR2M	RNA polymerase II subunit M [Source:HGNC Symbol;Acc:HGNC:14862]	81488	-0.157846	0.188804	0.275828	0.263118	0.0821826	0.490741	0.329113	0.10644	-0.237195	0.0946536	0.29233	0.396096	0.0279765	0.855569	0.725574	0.0538365	-0.206653	0.490037	0.775623	0.108397	0.0555382	0.81915	0.473438	0.0561773	0.500919	0.0530784	0.583038
ENSG00000170323	FABP4	fatty acid binding protein 4 [Source:HGNC Symbol;Acc:HGNC:3559]	2167	0.0997334	0.40197	0.39652	0.134409	0.0394966	0.737682	0.41734	0.0630367	0.110948	0.434664	0.51093	0.123276	-0.0885913	0.560925	0.643227	0.0899838	-0.218875	0.413545	0.752134	0.133094	0.168554	0.435303	0.33667	0.125329	0.493864	0.0229391	0.583038
ENSG00000112769	LAMA4	laminin subunit alpha 4 [Source:HGNC Symbol;Acc:HGNC:6484]	3910	0.0347335	0.764016	0.535518	0.060458	0.224037	0.0478765	0.0892341	0.518654	-0.030907	0.81772	0.638514	0.0561607	0.064518	0.653299	0.673537	0.0736508	0.0755552	0.773311	0.836354	0.0598334	0.409144	0.0404251	0.104122	0.595886	0.473863	0.00413829	0.583038
ENSG00000139329	LUM	lumican [Source:HGNC Symbol;Acc:HGNC:6724]	4060	-0.108762	0.365073	0.378794	0.149068	0.0189339	0.873656	0.458748	0.0529202	-0.169479	0.228776	0.404232	0.228942	-0.137846	0.362172	0.559723	0.150691	-0.00935051	0.974704	0.868597	0.0501182	0.373632	0.102789	0.159239	0.403448	0.469525	0.0354048	0.583038
ENSG00000172724	CCL19	C-C motif chemokine ligand 19 [Source:HGNC Symbol;Acc:HGNC:10617]	6363	-0.0871965	0.453183	0.420485	0.117176	0.0312912	0.785845	0.43197	0.0585565	-0.202261	0.133467	0.327653	0.330129	-0.110109	0.448821	0.596088	0.118742	0.0810791	0.768622	0.836354	0.0602599	0.233638	0.285944	0.265741	0.195483	0.467865	0.118222	0.583038
ENSG00000073756	PTGS2	prostaglandin-endoperoxide synthase 2 [Source:HGNC Symbol;Acc:HGNC:9605]	5743	-0.109105	0.352446	0.372622	0.154591	0.287634	0.011866	0.044462	0.728926	-0.130644	0.344507	0.475057	0.158633	0.215046	0.14464	0.426273	0.314728	-0.0476172	0.873951	0.85631	0.0529662	0.580568	0.00826653	0.0602508	0.840486	0.462591	0.199737	0.584142
ENSG00000135919	SERPINE2	serpin family E member 2 [Source:HGNC Symbol;Acc:HGNC:8951]	5270	-0.205822	0.0751266	0.173546	0.437025	0.103033	0.37105	0.278967	0.146548	-0.257371	0.0470194	0.228283	0.525768	-0.0329816	0.814984	0.7175	0.0563512	-0.123292	0.681679	0.823181	0.0700977	0.372416	0.112188	0.165859	0.384798	0.46145	0.0406315	0.583038
ENSG00000135127	BICDL1	BICD family like cargo adaptor 1 [Source:HGNC Symbol;Acc:HGNC:28095]	92558	-0.0530623	0.656346	0.497639	0.0731454	0.202772	0.0832166	0.119684	0.417913	-0.213707	0.129249	0.323159	0.336292	-0.107799	0.478221	0.608572	0.110044	0.19006	0.519801	0.788443	0.100534	0.654976	0.00178051	0.0489002	0.954276	0.455104	0.0152811	0.583038
ENSG00000135046	ANXA1	annexin A1 [Source:HGNC Symbol;Acc:HGNC:533]	301	-0.10825	0.339229	0.366381	0.160682	0.107791	0.33609	0.263549	0.162177	-0.127768	0.342567	0.473848	0.15954	-0.0324434	0.822643	0.71905	0.0558255	-0.367511	0.105251	0.542249	0.398403	0.307749	0.0915398	0.149416	0.428144	0.451291	0.0147895	0.583038
ENSG00000111341	MGP	matrix Gla protein [Source:HGNC Symbol;Acc:HGNC:7060]	4256	-0.214326	0.0727964	0.170451	0.442878	-0.252118	0.0322431	0.072171	0.585548	-0.325734	0.019254	0.167479	0.670017	-0.41711	0.00475924	0.233761	0.832089	-0.0566414	0.847977	0.850676	0.0543361	-0.0589163	0.80464	0.468832	0.0572358	0.448083	0.139053	0.583038
ENSG00000104332	SFRP1	secreted frizzled related protein 1 [Source:HGNC Symbol;Acc:HGNC:10776]	6422	-0.104148	0.372198	0.382295	0.146071	0.241904	0.0342747	0.0745537	0.575549	-0.166183	0.210938	0.393362	0.243747	0.255312	0.0710903	0.353933	0.450332	0.170736	0.546287	0.797294	0.0942222	0.401257	0.0666288	0.129254	0.495175	0.440551	0.0123713	0.583038
ENSG00000090530	P3H2	prolyl 3-hydroxylase 2 [Source:HGNC Symbol;Acc:HGNC:19317]	55214	0.132746	0.251477	0.316541	0.211227	0.236348	0.0374026	0.078096	0.561033	0.0470928	0.734659	0.616418	0.0633839	0.0831559	0.576255	0.646598	0.0868762	0.197229	0.510252	0.785093	0.102964	0.543321	0.0152468	0.0718663	0.762074	0.436415	0.01286	0.583038
ENSG00000149090	PAMR1	peptidase domain containing associated with muscle regeneration 1 [Source:HGNC Symbol;Acc:HGNC:24554]	25891	-0.129688	0.277709	0.331624	0.193972	0.123915	0.294595	0.244052	0.183926	-0.194434	0.165167	0.358539	0.289457	0.0503426	0.739138	0.700214	0.0629152	0.121731	0.670515	0.821537	0.0716467	0.347964	0.11955	0.17109	0.371272	0.431732	0.0372801	0.583038
ENSG00000171747	LGALS4	galectin 4 [Source:HGNC Symbol;Acc:HGNC:6565]	3960	0.044589	0.676107	0.505429	0.0703721	0.0680971	0.518696	0.340167	0.09934	0.0404491	0.760339	0.624658	0.0608233	-0.0593972	0.675884	0.680377	0.0704514	-0.0986777	0.690263	0.824794	0.0689535	0.219027	0.265343	0.254737	0.209301	0.430104	0.0365781	0.583038
ENSG00000164687	FABP5	fatty acid binding protein 5 [Source:HGNC Symbol;Acc:HGNC:3560]	2171	0.0446693	0.697154	0.51231	0.0676492	0.13719	0.225285	0.209808	0.230822	0.00962996	0.943718	0.671698	0.0505759	0.0425303	0.77104	0.708547	0.0598452	0.0123065	0.958945	0.866302	0.0503116	0.251848	0.18023	0.209738	0.285328	0.422636	0.0281217	0.583038
ENSG00000154134	ROBO3	roundabout guidance receptor 3 [Source:HGNC Symbol;Acc:HGNC:13433]	64221	0.124877	0.29275	0.340883	0.184987	0.162136	0.166398	0.177282	0.286676	0.0103035	0.941569	0.671498	0.0506208	0.0126385	0.933141	0.745371	0.0508134	0.0190813	0.947201	0.864527	0.0505158	0.272338	0.231665	0.239039	0.235192	0.417598	0.00138146	0.583038
ENSG00000109610	SOD3	superoxide dismutase 3 [Source:HGNC Symbol;Acc:HGNC:11181]	6649	-0.164813	0.16879	0.260586	0.284	0.0262393	0.825643	0.443557	0.0556142	-0.221093	0.111622	0.308056	0.364469	-0.15737	0.293298	0.524418	0.185253	-0.0110988	0.970303	0.868451	0.050163	0.288768	0.219779	0.232544	0.245491	0.414723	0.0585934	0.583038
ENSG00000184515	BEX5	brain expressed X-linked 5 [Source:HGNC Symbol;Acc:HGNC:27990]	340542	0.0277826	0.812897	0.548827	0.0564846	-0.0593223	0.609262	0.373703	0.0806654	-0.162738	0.246984	0.416855	0.215192	-0.179903	0.232254	0.490363	0.226215	0.373768	0.17966	0.616368	0.285975	-0.0672827	0.770056	0.457872	0.0601284	0.414063	0.00291394	0.583038
ENSG00000152137	HSPB8	heat shock protein family B (small) member 8 [Source:HGNC Symbol;Acc:HGNC:30171]	26353	-0.261807	0.02463	0.0960166	0.62801	-0.0347561	0.766197	0.4264	0.0602585	-0.31372	0.0225948	0.17399	0.646381	-0.212809	0.153848	0.433511	0.302947	-0.231559	0.335347	0.718	0.167254	0.18716	0.334226	0.290702	0.167828	0.413916	0.0310058	0.583038
ENSG00000116824	CD2	CD2 molecule [Source:HGNC Symbol;Acc:HGNC:1639]	914	-0.0135299	0.909212	0.574539	0.0515004	0.273709	0.0178499	0.0531418	0.675126	-0.136139	0.329946	0.466006	0.165623	-0.0137539	0.927088	0.743324	0.0509679	0.051381	0.867926	0.855603	0.05326	0.678918	0.00188148	0.0489002	0.951866	0.413214	0.0380036	0.583038
ENSG00000102760	RGCC	regulator of cell cycle [Source:HGNC Symbol;Acc:HGNC:20369]	28984	-0.10787	0.367262	0.379721	0.148138	0.144898	0.219998	0.207259	0.23511	-0.127325	0.360742	0.481409	0.151313	-0.0150736	0.919834	0.741847	0.0511708	-0.229192	0.383272	0.739079	0.145054	0.416332	0.0391747	0.102401	0.601936	0.412892	0.0386075	0.583038
ENSG00000130600	H19	H19 imprinted maternally expressed transcript [Source:HGNC Symbol;Acc:HGNC:4713]	283120	-0.208185	0.0675376	0.163695	0.456733	-0.17425	0.122979	0.148782	0.343921	-0.258074	0.0480493	0.228838	0.521926	-0.221075	0.116043	0.401849	0.357003	-0.250947	0.383429	0.739079	0.144988	-0.370583	0.100982	0.157718	0.407229	0.412417	0.153589	0.583038
ENSG00000137033	IL33	interleukin 33 [Source:HGNC Symbol;Acc:HGNC:16028]	90865	-0.228387	0.0452776	0.134094	0.5284	0.0598911	0.599502	0.370152	0.0823963	-0.313305	0.0173535	0.161395	0.684812	-0.0219131	0.879202	0.733402	0.0526727	-0.116188	0.692217	0.824794	0.0686987	0.240909	0.302539	0.274856	0.185291	0.405591	0.00620049	0.583038
ENSG00000178860	MSC	musculin [Source:HGNC Symbol;Acc:HGNC:7321]	9242	-0.190098	0.112665	0.212362	0.360586	0.143061	0.228959	0.211361	0.227912	-0.279161	0.0449094	0.224918	0.533864	-0.0843461	0.577199	0.646689	0.0866905	0.0858405	0.77248	0.836354	0.0599083	0.575798	0.00812054	0.0599721	0.842459	0.402383	0.187869	0.583038
ENSG00000110944	IL23A	interleukin 23 subunit alpha [Source:HGNC Symbol;Acc:HGNC:15488]	51561	-0.11695	0.325189	0.35842	0.167525	0.157829	0.178547	0.184207	0.273496	-0.196697	0.16274	0.356614	0.292263	0.00949417	0.95024	0.750004	0.05045	0.0718418	0.806111	0.843916	0.0571244	0.51386	0.018807	0.0767109	0.730413	0.402062	0.536447	0.686742
ENSG00000167779	IGFBP6	insulin like growth factor binding protein 6 [Source:HGNC Symbol;Acc:HGNC:5475]	3489	-0.230961	0.0533143	0.146199	0.499618	-0.0454004	0.70389	0.405342	0.0668262	-0.317503	0.0241363	0.178468	0.636334	-0.300458	0.0474294	0.327723	0.52423	-0.109811	0.707205	0.827153	0.0668118	0.308127	0.18092	0.210025	0.284546	0.394549	0.145371	0.583038
ENSG00000069493	CLEC2D	C-type lectin domain family 2 member D [Source:HGNC Symbol;Acc:HGNC:14351]	29121	-0.110391	0.3494	0.371559	0.155966	0.255512	0.0268177	0.065065	0.614886	-0.204535	0.141209	0.336196	0.319321	0.0900961	0.548112	0.637439	0.0927159	-0.0553827	0.852524	0.852167	0.0540767	0.532793	0.0162928	0.0730459	0.752324	0.391419	0.0660268	0.583038
ENSG00000154096	THY1	Thy-1 cell surface antigen [Source:HGNC Symbol;Acc:HGNC:11801]	7070	0.036413	0.761514	0.534457	0.0606894	0.245015	0.0366987	0.0773518	0.564213	-0.0161829	0.909448	0.66366	0.0514956	0.175462	0.247487	0.500798	0.21483	0.155819	0.596256	0.807092	0.0838626	0.427651	0.0589742	0.122371	0.520443	0.390711	0.10834	0.583038
ENSG00000081059	TCF7	transcription factor 7 [Source:HGNC Symbol;Acc:HGNC:11639]	6932	-0.0154601	0.896808	0.571269	0.0519413	0.293924	0.0111596	0.0434768	0.736433	-0.139075	0.329029	0.465692	0.166078	0.0341163	0.823809	0.719125	0.0557477	0.0559716	0.855324	0.8532	0.0539212	0.58667	0.00926892	0.0621292	0.827402	0.389464	0.0227134	0.583038	*
ENSG00000203883	SOX18	SRY-box transcription factor 18 [Source:HGNC Symbol;Acc:HGNC:11194]	54345	0.119344	0.311839	0.35117	0.174416	0.199439	0.0858646	0.121467	0.412028	0.0677931	0.632266	0.582937	0.0768924	0.126184	0.405078	0.579152	0.133558	0.22519	0.356308	0.732459	0.157	0.243649	0.211248	0.22766	0.253314	0.387036	0.0236302	0.583038
ENSG00000169442	CD52	CD52 molecule [Source:HGNC Symbol;Acc:HGNC:1804]	1043	0.149797	0.20779	0.288273	0.245491	0.116523	0.322805	0.257461	0.168727	0.121856	0.387712	0.493584	0.140151	0.0102225	0.946246	0.749079	0.0505252	0.0291179	0.922447	0.8609	0.0511153	0.201253	0.399358	0.320368	0.138522	0.385168	0.0657316	0.583038
ENSG00000227507	LTB	lymphotoxin beta [Source:HGNC Symbol;Acc:HGNC:6711]	4050	0.0583782	0.622572	0.48645	0.0784031	0.361799	0.00152914	0.0174895	0.90506	-0.0794258	0.569748	0.560677	0.0881744	0.14496	0.331897	0.544881	0.164662	0.335645	0.263745	0.679814	0.210432	0.663613	0.00221457	0.0489002	0.944139	0.384319	0.203476	0.584189
ENSG00000026508	CD44	CD44 molecule (Indian blood group) [Source:HGNC Symbol;Acc:HGNC:1681]	960	-0.0380711	0.747769	0.529725	0.0620113	0.287969	0.0123657	0.0451703	0.723797	-0.124414	0.377349	0.488292	0.144301	0.141396	0.349012	0.554727	0.156553	0.103251	0.734781	0.830791	0.0636425	0.601658	0.00684903	0.0570506	0.860452	0.383694	0.0892661	0.583038
ENSG00000170476	MZB1	marginal zone B and B1 cell specific protein [Source:HGNC Symbol;Acc:HGNC:30125]	51237	-0.0611231	0.602402	0.480568	0.0818755	0.195246	0.0901962	0.124756	0.402757	-0.193623	0.157244	0.351554	0.29879	0.103455	0.483229	0.610202	0.108653	0.230146	0.452425	0.763239	0.119655	0.322428	0.184277	0.212163	0.280796	0.382026	0.0845216	0.583038
ENSG00000136960	ENPP2	ectonucleotide pyrophosphatase/phosphodiesterase 2 [Source:HGNC Symbol;Acc:HGNC:3357]	5168	-0.0813071	0.46142	0.423216	0.114695	0.06229	0.568696	0.358155	0.0882825	-0.0949507	0.474899	0.525876	0.110981	0.102345	0.472352	0.606989	0.111707	-0.389727	0.0741421	0.513268	0.472792	-0.0515925	0.77906	0.460548	0.059324	0.38069	0.0340532	0.583038
ENSG00000262655	SPON1	spondin 1 [Source:HGNC Symbol;Acc:HGNC:11252]	10418	-0.196236	0.0913068	0.190833	0.400447	0.0322755	0.78061	0.430197	0.0589935	-0.307852	0.0242331	0.178688	0.635719	-0.0699921	0.638845	0.667969	0.0758503	0.229264	0.45004	0.762684	0.120423	0.287489	0.234573	0.240064	0.232773	0.379728	0.00306531	0.583038
ENSG00000104894	CD37	CD37 molecule [Source:HGNC Symbol;Acc:HGNC:1666]	951	0.0101508	0.930778	0.580319	0.0508703	0.209864	0.0668781	0.105716	0.458538	-0.113776	0.410241	0.502299	0.13168	-0.0301508	0.839037	0.722252	0.0547808	0.234352	0.428693	0.758749	0.12762	0.541716	0.0145551	0.0707794	0.768751	0.378587	0.0378197	0.583038
ENSG00000247774	PCED1B-AS1	PCED1B antisense RNA 1 [Source:HGNC Symbol;Acc:HGNC:44166]	100233209	0.0924635	0.433089	0.412028	0.123551	0.180897	0.119203	0.146293	0.349855	-0.0371705	0.786463	0.630565	0.0585245	-0.0782785	0.594196	0.651265	0.083452	0.257037	0.393456	0.743193	0.14087	0.563492	0.0122368	0.0672555	0.792641	0.378498	0.057432	0.583038
ENSG00000168685	IL7R	interleukin 7 receptor [Source:HGNC Symbol;Acc:HGNC:6024]	3575	0.20828	0.0676825	0.163877	0.456339	0.356117	0.00128091	0.0165708	0.914159	0.154178	0.254144	0.42043	0.21012	0.167946	0.246356	0.499992	0.215645	0.111378	0.708451	0.827153	0.0666603	0.616137	0.00414574	0.0538128	0.904828	0.376034	0.054712	0.583038
ENSG00000019991	HGF	hepatocyte growth factor [Source:HGNC Symbol;Acc:HGNC:4893]	3082	0.226257	0.0522892	0.144856	0.503078	0.355251	0.00173362	0.0185958	0.898128	0.115146	0.415143	0.50422	0.129932	0.319108	0.0324599	0.305111	0.58916	0.465408	0.113605	0.550511	0.382125	0.348157	0.144277	0.186946	0.331501	0.375443	0.0094367	0.583038	*
ENSG00000122176	FMOD	fibromodulin [Source:HGNC Symbol;Acc:HGNC:3774]	2331	-0.0511621	0.666978	0.501752	0.0716265	0.170493	0.145028	0.163673	0.312601	-0.153322	0.276481	0.435472	0.195381	0.0653704	0.666252	0.677017	0.0717813	0.300861	0.303293	0.698144	0.184846	0.395565	0.0847002	0.143926	0.444649	0.373998	0.0381302	0.583038
ENSG00000149212	SESN3	sestrin 3 [Source:HGNC Symbol;Acc:HGNC:23060]	143686	0.0637281	0.586588	0.474345	0.0847841	0.286849	0.0118582	0.044462	0.729008	-0.141291	0.317622	0.458582	0.171882	-0.0455785	0.764356	0.706553	0.06045	0.233893	0.438919	0.760725	0.1241	0.651958	0.00268624	0.0489752	0.933739	0.372995	9.95709e-05	0.583038	*
ENSG00000137731	FXYD2	FXYD domain containing ion transport regulator 2 [Source:HGNC Symbol;Acc:HGNC:4026]	486	-0.0469123	0.695204	0.511833	0.0678917	0.0247082	0.834826	0.446541	0.055028	-0.127985	0.362324	0.48219	0.150625	-0.101418	0.501213	0.620439	0.103858	0.171193	0.569481	0.800718	0.0891762	0.217096	0.367736	0.307051	0.151776	0.371894	0.0710423	0.583038
ENSG00000118785	SPP1	secreted phosphoprotein 1 [Source:HGNC Symbol;Acc:HGNC:11255]	6696	0.193986	0.101592	0.20163	0.380242	0.135188	0.250629	0.223033	0.211822	0.193603	0.166307	0.360014	0.288154	0.166826	0.266989	0.513165	0.201454	0.122951	0.663558	0.820008	0.0726477	-0.09748	0.66892	0.425394	0.0718738	0.369737	0.112468	0.583038
ENSG00000106624	AEBP1	AE binding protein 1 [Source:HGNC Symbol;Acc:HGNC:303]	165	-0.0457792	0.699222	0.513004	0.067394	0.100076	0.392481	0.287712	0.137982	-0.0987727	0.476166	0.526127	0.110622	-0.00145228	0.992216	0.756906	0.050011	0.187278	0.539197	0.794863	0.0958523	0.345601	0.15008	0.19079	0.323232	0.36962	0.0279285	0.583038
ENSG00000165617	DACT1	dishevelled binding antagonist of beta catenin 1 [Source:HGNC Symbol;Acc:HGNC:17748]	51339	-0.209666	0.0793451	0.17822	0.426836	0.230874	0.0503597	0.0916326	0.509747	-0.314187	0.0243993	0.178688	0.634668	0.0437832	0.773972	0.709289	0.059586	-0.0230453	0.938794	0.863275	0.0506936	0.527101	0.0186445	0.0764558	0.73177	0.369176	0.128595	0.583038
ENSG00000277075	H2AC8	H2A clustered histone 8 [Source:HGNC Symbol;Acc:HGNC:4724]	3012	0.0596946	0.622495	0.48645	0.0784158	-0.00822902	0.945346	0.477404	0.0505419	-0.0432099	0.76063	0.624658	0.060796	-0.119006	0.432758	0.591047	0.123905	0.242527	0.426245	0.757373	0.128483	-0.00273112	0.991215	0.517664	0.0500143	0.36836	0.0549731	0.583038
ENSG00000158050	DUSP2	dual specificity phosphatase 2 [Source:HGNC Symbol;Acc:HGNC:3068]	1844	-0.182171	0.123205	0.223985	0.343572	0.01381	0.9066	0.46774	0.0515884	-0.283871	0.0422877	0.221711	0.544372	-0.210755	0.162957	0.441912	0.292011	-0.115179	0.688763	0.824794	0.0691506	0.402524	0.0696584	0.131587	0.485886	0.36595	0.0940619	0.583038
ENSG00000188042	ARL4C	ADP ribosylation factor like GTPase 4C [Source:HGNC Symbol;Acc:HGNC:698]	10123	0.0190623	0.870554	0.563666	0.053067	0.297992	0.00866613	0.038631	0.765774	-0.0556432	0.686757	0.598911	0.0690106	0.0208013	0.888195	0.735869	0.0522864	0.0625997	0.832625	0.847875	0.0552739	0.61926	0.00360142	0.0520028	0.9151	0.362358	0.0459744	0.583038	*
ENSG00000090104	RGS1	regulator of G protein signaling 1 [Source:HGNC Symbol;Acc:HGNC:9991]	5996	-0.0958788	0.416911	0.403216	0.129038	0.128804	0.26957	0.232239	0.199098	-0.166545	0.228479	0.403884	0.229177	-0.093477	0.529892	0.631085	0.0968239	-0.166358	0.582817	0.802781	0.0864638	0.472459	0.0411188	0.104543	0.592594	0.360421	0.124438	0.583038
ENSG00000023892	DEF6	DEF6 guanine nucleotide exchange factor [Source:HGNC Symbol;Acc:HGNC:2760]	50619	0.177805	0.133212	0.231869	0.328724	0.260194	0.0252056	0.0633599	0.624474	-0.0723311	0.607339	0.573118	0.0810823	-0.0430191	0.77566	0.709505	0.0594386	0.546032	0.0498265	0.476582	0.554692	0.441067	0.0494064	0.113268	0.55639	0.358701	0.0137139	0.583038
ENSG00000103241	FOXF1	forkhead box F1 [Source:HGNC Symbol;Acc:HGNC:3809]	2294	-0.108121	0.361305	0.377053	0.150687	0.179122	0.124731	0.149958	0.341231	-0.133789	0.315787	0.457721	0.172842	0.130835	0.360314	0.559014	0.1515	-0.0701914	0.795416	0.84193	0.0579557	0.318684	0.132053	0.178587	0.35017	0.358662	0.0496952	0.583038
ENSG00000107742	SPOCK2	SPARC (osteonectin), cwcv and kazal like domains proteoglycan 2 [Source:HGNC Symbol;Acc:HGNC:13564]	9806	0.00688915	0.952037	0.585976	0.0504171	0.280205	0.0118284	0.044462	0.729318	-0.116412	0.387401	0.493299	0.140273	0.047005	0.745291	0.702211	0.0622866	0.152795	0.602004	0.807606	0.0827891	0.581664	0.00661383	0.0566509	0.863953	0.356151	0.0576517	0.583038
ENSG00000102265	TIMP1	TIMP metallopeptidase inhibitor 1 [Source:HGNC Symbol;Acc:HGNC:11820]	7076	0.226652	0.0481961	0.138272	0.517487	0.337261	0.00257168	0.0217376	0.873514	0.143975	0.297186	0.446799	0.183018	0.254197	0.0836463	0.372187	0.419658	0.352945	0.214282	0.650388	0.250489	0.412409	0.0647276	0.127628	0.5012	0.354976	0.0266104	0.583038	*
ENSG00000163297	ANTXR2	ANTXR cell adhesion molecule 2 [Source:HGNC Symbol;Acc:HGNC:21732]	118429	0.0211971	0.857539	0.561031	0.0537233	0.310588	0.00665065	0.0338327	0.793803	-0.0194972	0.89012	0.658201	0.0522078	0.168642	0.262597	0.510211	0.204357	0.117789	0.693398	0.824794	0.0685457	0.651798	0.002131	0.0489002	0.946046	0.354376	0.0467689	0.583038	*
ENSG00000117525	F3	coagulation factor III, tissue factor [Source:HGNC Symbol;Acc:HGNC:3541]	2152	-0.000130465	0.999121	0.59728	0.0500001	0.250475	0.0303387	0.0696889	0.59538	-0.0627398	0.648664	0.587724	0.0743428	0.136743	0.352939	0.556271	0.154771	0.129061	0.669259	0.821537	0.0718254	0.480721	0.036382	0.099439	0.616017	0.353608	0.230722	0.594111
ENSG00000215788	TNFRSF25	TNF receptor superfamily member 25 [Source:HGNC Symbol;Acc:HGNC:11910]	8718	0.0392354	0.734021	0.524903	0.0634206	0.242556	0.0315325	0.0714114	0.589162	-0.054717	0.683661	0.597691	0.0694144	0.0231105	0.872487	0.731658	0.0529813	0.0107563	0.971949	0.868559	0.0501454	0.446421	0.0568278	0.12041	0.528047	0.350919	0.0409659	0.583038
ENSG00000170955	CAVIN3	caveolae associated protein 3 [Source:HGNC Symbol;Acc:HGNC:9400]	112464	-0.2211	0.0644536	0.160448	0.465311	0.00242889	0.983777	0.486639	0.0500477	-0.293725	0.0339428	0.201781	0.581765	-0.190755	0.20367	0.46916	0.250206	-0.0420676	0.884319	0.857719	0.052494	0.407109	0.0672586	0.129572	0.493212	0.345884	0.0898706	0.583038
ENSG00000185862	EVI2B	ecotropic viral integration site 2B [Source:HGNC Symbol;Acc:HGNC:3500]	2124	0.0342861	0.769962	0.536584	0.0599193	0.186364	0.105635	0.136753	0.372834	0.00835584	0.951565	0.673477	0.0504263	-0.0559915	0.703954	0.690561	0.066858	-0.197405	0.52059	0.788692	0.100337	0.43571	0.0668291	0.129369	0.494549	0.344802	0.030345	0.583038
ENSG00000115641	FHL2	four and a half LIM domains 2 [Source:HGNC Symbol;Acc:HGNC:3703]	2274	0.0300069	0.797193	0.544371	0.0576497	0.163029	0.155899	0.170521	0.298938	-0.0150899	0.913453	0.664129	0.0513656	0.00990037	0.946953	0.749294	0.0505115	0.164223	0.582066	0.802699	0.0866129	0.499685	0.0267889	0.0878476	0.671737	0.344762	0.0235473	0.583038
ENSG00000004776	HSPB6	heat shock protein family B (small) member 6 [Source:HGNC Symbol;Acc:HGNC:26511]	126393	-0.180783	0.131059	0.230319	0.33182	-0.0610552	0.608293	0.373347	0.0808344	-0.260725	0.0606423	0.248464	0.479831	-0.19529	0.19286	0.460525	0.260323	-0.0535193	0.861324	0.854612	0.0535985	0.0818676	0.74009	0.449183	0.0630757	0.343375	0.113616	0.583038
ENSG00000163453	IGFBP7	insulin like growth factor binding protein 7 [Source:HGNC Symbol;Acc:HGNC:5476]	3490	-0.046487	0.699178	0.513004	0.0673995	0.0632809	0.594796	0.368505	0.0832534	-0.0733962	0.607131	0.573118	0.0811188	-0.0378539	0.804717	0.716253	0.057094	-0.111055	0.707622	0.827153	0.066761	0.23215	0.325247	0.286186	0.172531	0.343101	0.0332844	0.583038
ENSG00000119632	IFI27L2	interferon alpha inducible protein 27 like 2 [Source:HGNC Symbol;Acc:HGNC:19753]	83982	0.00358749	0.976191	0.592434	0.0501027	0.00689983	0.953733	0.47949	0.0503881	-0.0877487	0.536396	0.547658	0.0953265	-0.153456	0.311845	0.536098	0.174931	0.122597	0.673134	0.821802	0.071277	0.25435	0.270721	0.257644	0.20556	0.341968	0.040519	0.583038
ENSG00000143196	DPT	dermatopontin [Source:HGNC Symbol;Acc:HGNC:3011]	1805	-0.239469	0.0392309	0.123907	0.552992	-0.0856161	0.460921	0.316769	0.114843	-0.288625	0.031516	0.196544	0.594006	-0.166792	0.252165	0.50391	0.211504	-0.03202	0.916384	0.860059	0.0512973	0.141734	0.562619	0.386898	0.0906246	0.341775	0.113348	0.583038
ENSG00000081237	PTPRC	protein tyrosine phosphatase receptor type C [Source:HGNC Symbol;Acc:HGNC:9666]	5788	0.0271286	0.814883	0.549366	0.0563446	0.262912	0.0198925	0.0556147	0.659726	-0.0370732	0.788478	0.631277	0.0583595	0.0975	0.509717	0.624591	0.101696	-0.109132	0.705	0.827153	0.067082	0.47008	0.0312734	0.09281	0.644097	0.341774	0.0444608	0.583038
ENSG00000019582	CD74	CD74 molecule [Source:HGNC Symbol;Acc:HGNC:1697]	972	0.178116	0.135089	0.2336	0.326065	0.278367	0.0171491	0.0524935	0.680699	0.107554	0.439324	0.511698	0.121758	0.128439	0.388587	0.572546	0.139808	0.113702	0.695274	0.824794	0.0683042	0.421781	0.0586527	0.122006	0.521567	0.3402	0.00516089	0.583038
ENSG00000130592	LSP1	lymphocyte specific protein 1 [Source:HGNC Symbol;Acc:HGNC:6707]	4046	0.0501096	0.671297	0.503623	0.0710273	0.366185	0.00125734	0.0164764	0.915069	0.0361318	0.79007	0.631934	0.0582305	0.272638	0.0574608	0.34136	0.489702	0.0122166	0.968143	0.86801	0.0501876	0.490056	0.0344058	0.0971161	0.626498	0.338776	0.134632	0.583038
ENSG00000150630	VEGFC	vascular endothelial growth factor C [Source:HGNC Symbol;Acc:HGNC:12682]	7424	-0.188171	0.116645	0.216937	0.353982	0.125483	0.292089	0.242881	0.185369	-0.296893	0.0337391	0.201654	0.582766	-0.0585887	0.700586	0.688824	0.0672677	0.102859	0.723312	0.828025	0.0649141	0.49849	0.0223373	0.0813339	0.702689	0.338066	0.098561	0.583038
ENSG00000169508	GPR183	G protein-coupled receptor 183 [Source:HGNC Symbol;Acc:HGNC:3128]	1880	-0.042929	0.712632	0.518088	0.0657922	0.274519	0.0155519	0.0501722	0.694035	-0.0173281	0.898981	0.660871	0.0518638	0.0734888	0.615091	0.659529	0.0797374	-0.388196	0.191499	0.629763	0.272991	0.584847	0.00880868	0.0614431	0.833313	0.336784	0.0818294	0.583038
ENSG00000184867	ARMCX2	armadillo repeat containing X-linked 2 [Source:HGNC Symbol;Acc:HGNC:16869]	9823	-0.264504	0.0245232	0.0958746	0.628673	0.133558	0.2561	0.226316	0.208027	-0.371612	0.0055155	0.113192	0.81864	-0.0381762	0.796055	0.714596	0.0577551	-0.0598554	0.841912	0.850121	0.054695	0.420104	0.0691102	0.130981	0.487539	0.336499	0.0295335	0.583038
ENSG00000164949	GEM	GTP binding protein overexpressed in skeletal muscle [Source:HGNC Symbol;Acc:HGNC:4234]	2669	-0.250808	0.0342501	0.114558	0.575668	0.0827486	0.485099	0.326884	0.107962	-0.27993	0.0435944	0.22311	0.539069	-0.0354753	0.814203	0.7175	0.0564062	-0.237254	0.430041	0.758749	0.127148	0.343262	0.148332	0.189656	0.325685	0.336068	0.152798	0.583038
ENSG00000140368	PSTPIP1	proline-serine-threonine phosphatase interacting protein 1 [Source:HGNC Symbol;Acc:HGNC:9580]	9051	0.0601448	0.617721	0.486	0.0792146	0.265428	0.0240214	0.0618907	0.631816	-0.150213	0.290768	0.44337	0.186727	-0.0372503	0.807645	0.716478	0.0568777	0.418108	0.163714	0.603828	0.305116	0.56752	0.0129551	0.0681995	0.784971	0.335887	0.0450134	0.583038
ENSG00000115165	CYTIP	cytohesin 1 interacting protein [Source:HGNC Symbol;Acc:HGNC:9506]	9595	0.0189105	0.872973	0.564401	0.0529522	0.296371	0.00986979	0.0408582	0.751001	-0.00627259	0.964163	0.676189	0.0502332	0.0657198	0.660252	0.675151	0.0726355	-0.139383	0.647098	0.817421	0.0751286	0.635575	0.00377037	0.0530764	0.911852	0.334105	0.0724223	0.583038
ENSG00000147168	IL2RG	interleukin 2 receptor subunit gamma [Source:HGNC Symbol;Acc:HGNC:6010]	3561	-0.0038652	0.974031	0.591916	0.0501222	0.33099	0.00392507	0.0259611	0.841862	-0.0554182	0.692299	0.601256	0.0683002	0.137818	0.357194	0.558439	0.152872	-0.110465	0.718741	0.828025	0.0654392	0.630247	0.00447022	0.0538128	0.898954	0.331139	0.0623574	0.583038
ENSG00000026025	VIM	vimentin [Source:HGNC Symbol;Acc:HGNC:12692]	7431	-0.15521	0.192122	0.277655	0.259896	0.133668	0.256766	0.226584	0.207572	-0.201629	0.147242	0.342255	0.311319	-0.0209861	0.88894	0.736022	0.0522558	-0.183878	0.539894	0.794912	0.0956901	0.412206	0.0764535	0.13632	0.466324	0.3304	0.0705496	0.583038
ENSG00000134202	GSTM3	glutathione S-transferase mu 3 [Source:HGNC Symbol;Acc:HGNC:4635]	2947	-0.250343	0.0321436	0.110342	0.586051	-0.0940418	0.421068	0.299368	0.127596	-0.374244	0.00605909	0.116635	0.809641	-0.202614	0.174782	0.448461	0.278765	-0.0481597	0.875354	0.85631	0.0528998	-0.00803126	0.974132	0.51365	0.0501236	0.329134	0.188165	0.583038
ENSG00000197956	S100A6	S100 calcium binding protein A6 [Source:HGNC Symbol;Acc:HGNC:10496]	6277	-0.130558	0.259622	0.321897	0.205637	-0.00648496	0.955028	0.47989	0.0503667	-0.215333	0.1059	0.30231	0.374578	-0.150421	0.294706	0.525883	0.184439	0.06688	0.805616	0.843916	0.0571618	0.22801	0.290919	0.26824	0.192345	0.32626	0.0912383	0.583038
ENSG00000153563	CD8A	CD8a molecule [Source:HGNC Symbol;Acc:HGNC:1706]	925	-0.0490837	0.67902	0.506638	0.0699812	0.103203	0.378357	0.282042	0.143547	-0.115925	0.40506	0.500637	0.133565	-0.0868742	0.560956	0.643227	0.0899773	-0.123937	0.688488	0.824794	0.0691869	0.36478	0.131636	0.178536	0.350839	0.32559	0.0792914	0.583038
ENSG00000118849	RARRES1	retinoic acid receptor responder 1 [Source:HGNC Symbol;Acc:HGNC:9867]	5918	0.0344937	0.774248	0.538291	0.0595406	0.126803	0.285093	0.239683	0.189485	-0.145561	0.295126	0.445758	0.184197	-0.054808	0.714007	0.694544	0.0656696	0.565986	0.0351607	0.423253	0.622441	0.491478	0.0217926	0.0805452	0.706764	0.324603	0.058213	0.583038
ENSG00000181804	SLC9A9	solute carrier family 9 member A9 [Source:HGNC Symbol;Acc:HGNC:20653]	285195	-0.0761626	0.528442	0.450685	0.0970268	0.132139	0.267834	0.231464	0.200218	-0.221413	0.118352	0.3132	0.353216	-0.167467	0.272634	0.514419	0.197809	0.0154057	0.959223	0.866323	0.0503074	0.496714	0.0288428	0.0905075	0.658687	0.324517	0.005016	0.583038
ENSG00000090924	PLEKHG2	pleckstrin homology and RhoGEF domain containing G2 [Source:HGNC Symbol;Acc:HGNC:29515]	64857	-0.0303269	0.799542	0.545153	0.0574688	0.159615	0.174556	0.182088	0.277715	-0.0970916	0.492852	0.530638	0.106049	0.0555776	0.7145	0.694713	0.0656126	-0.0709623	0.807153	0.844018	0.0570461	0.277212	0.227747	0.237302	0.238513	0.324028	0.0101584	0.583038
ENSG00000165714	BORCS5	BLOC-1 related complex subunit 5 [Source:HGNC Symbol;Acc:HGNC:17950]	118426	0.195685	0.0913946	0.19087	0.400266	0.0199202	0.863188	0.455849	0.0534303	-0.00425831	0.974118	0.678438	0.0501216	-0.0243888	0.862335	0.728319	0.0534811	0.430141	0.0872306	0.525269	0.438398	0.100185	0.634463	0.413937	0.0771438	0.323838	0.023832	0.583038
ENSG00000115935	WIPF1	WAS/WASL interacting protein family member 1 [Source:HGNC Symbol;Acc:HGNC:12736]	7456	0.147092	0.208057	0.288359	0.245256	0.295082	0.00960672	0.0404239	0.754125	0.041657	0.762349	0.625132	0.0606357	0.0852157	0.563437	0.643227	0.0894626	0.173191	0.572838	0.800803	0.0884808	0.588991	0.00932557	0.0621292	0.826686	0.323186	0.00735967	0.583038	*
ENSG00000101017	CD40	CD40 molecule [Source:HGNC Symbol;Acc:HGNC:11919]	958	-0.0156875	0.896788	0.571269	0.0519421	0.269002	0.0225259	0.0596049	0.641484	-0.131426	0.357724	0.481059	0.152637	0.089348	0.560374	0.643227	0.0900988	0.315974	0.291642	0.690929	0.191895	0.641593	0.00324001	0.0513025	0.92224	0.321379	0.0494716	0.583038
ENSG00000082074	FYB1	FYN binding protein 1 [Source:HGNC Symbol;Acc:HGNC:4036]	2533	0.159218	0.177552	0.267249	0.274538	0.372837	0.0010695	0.0157175	0.922648	-0.000265333	0.998484	0.683115	0.0500004	0.11505	0.441139	0.594096	0.121173	0.220631	0.459059	0.765243	0.117553	0.563081	0.0109742	0.0654853	0.80678	0.319092	0.0112	0.583038
ENSG00000204287	HLA-DRA	major histocompatibility complex, class II, DR alpha [Source:HGNC Symbol;Acc:HGNC:4947]	3122	0.0809607	0.488468	0.434498	0.10705	0.184346	0.10876	0.13884	0.367294	0.0889083	0.512495	0.538913	0.101004	0.0584784	0.688012	0.684152	0.0688483	-0.448174	0.115747	0.55265	0.378148	0.282113	0.226119	0.236404	0.239914	0.318485	0.0336844	0.583038
ENSG00000109113	RAB34	RAB34, member RAS oncogene family [Source:HGNC Symbol;Acc:HGNC:16519]	83871	-0.0592225	0.619176	0.486151	0.0789697	0.188148	0.108153	0.138303	0.368357	-0.143917	0.29529	0.445758	0.184103	0.0705482	0.633271	0.666187	0.0767315	0.171999	0.564094	0.798922	0.0903101	0.424455	0.0653583	0.127949	0.499184	0.31828	0.0347204	0.583038
ENSG00000196154	S100A4	S100 calcium binding protein A4 [Source:HGNC Symbol;Acc:HGNC:10494]	6275	0.117733	0.326596	0.359099	0.166821	0.127694	0.281905	0.238076	0.191404	-0.0269776	0.848683	0.646804	0.0542167	-0.111467	0.461107	0.60168	0.114994	0.467412	0.0837062	0.520801	0.447153	0.55259	0.00723526	0.0580002	0.854824	0.317339	0.0433856	0.583038
ENSG00000160013	PTGIR	prostaglandin I2 receptor [Source:HGNC Symbol;Acc:HGNC:9602]	5739	-0.0486123	0.684795	0.509068	0.0692199	0.178502	0.129597	0.152977	0.333953	-0.138085	0.329524	0.465777	0.165833	0.0626146	0.680829	0.681926	0.0697883	0.010608	0.971687	0.868559	0.0501481	0.341859	0.143735	0.186558	0.332293	0.316263	0.0467057	0.583038
ENSG00000061918	GUCY1B1	guanylate cyclase 1 soluble subunit beta 1 [Source:HGNC Symbol;Acc:HGNC:4687]	2983	0.00721671	0.952054	0.585976	0.0504168	0.245658	0.036217	0.0767815	0.566417	-0.0999615	0.478391	0.526604	0.109997	0.0978979	0.517245	0.626578	0.099837	0.0779919	0.797269	0.842001	0.0578081	0.4215	0.07179	0.133022	0.479567	0.311548	0.0358972	0.583038
ENSG00000188677	PARVB	parvin beta [Source:HGNC Symbol;Acc:HGNC:14653]	29780	0.0720887	0.534799	0.453103	0.0955608	0.262786	0.0203763	0.056377	0.656248	-0.000535325	0.996953	0.683115	0.0500017	0.186176	0.212487	0.476198	0.242404	0.10493	0.717738	0.828025	0.0655558	0.437208	0.0489846	0.113042	0.558107	0.310387	0.0215539	0.583038
ENSG00000112936	C7	complement C7 [Source:HGNC Symbol;Acc:HGNC:1346]	730	-0.200022	0.0916431	0.19131	0.399753	0.0437072	0.711591	0.408372	0.0659133	-0.242167	0.0760137	0.268328	0.437756	-0.0340441	0.818078	0.718116	0.0561359	0.193254	0.51499	0.786716	0.101747	0.315717	0.178569	0.208957	0.287222	0.314038	0.236255	0.595631
ENSG00000090554	FLT3LG	fms related receptor tyrosine kinase 3 ligand [Source:HGNC Symbol;Acc:HGNC:3766]	2323	0.0543555	0.651663	0.495851	0.0738346	0.181604	0.12507	0.150134	0.340713	-0.0779837	0.57611	0.56277	0.086905	-0.15556	0.296625	0.527804	0.183338	0.242858	0.411464	0.752034	0.133872	0.576729	0.00834086	0.0603469	0.839488	0.309961	0.0318834	0.583038
ENSG00000134259	NGF	nerve growth factor [Source:HGNC Symbol;Acc:HGNC:7808]	4803	-0.223933	0.0606715	0.155578	0.476339	0.0308363	0.795968	0.434983	0.0577449	-0.294237	0.0310733	0.195602	0.596318	-0.117537	0.428659	0.589133	0.125272	0.0419182	0.879282	0.85668	0.0527181	0.348481	0.104207	0.160139	0.400527	0.310955	0.166415	0.583038
ENSG00000068366	ACSL4	acyl-CoA synthetase long chain family member 4 [Source:HGNC Symbol;Acc:HGNC:3571]	2182	0.0855232	0.466673	0.425099	0.113151	0.319292	0.00504893	0.0293077	0.820165	0.0475702	0.735756	0.616824	0.0632682	0.215951	0.149801	0.430891	0.30803	0.0485036	0.873515	0.85631	0.052987	0.548854	0.0153735	0.0719039	0.760871	0.309791	0.0321989	0.583038
ENSG00000182195	LDOC1	LDOC1 regulator of NFKB signaling [Source:HGNC Symbol;Acc:HGNC:6548]	23641	-0.0674856	0.576141	0.470526	0.0867993	0.103375	0.386151	0.285631	0.140439	-0.186413	0.188917	0.376376	0.264175	-0.0460228	0.763589	0.706209	0.0605208	0.230516	0.434829	0.75955	0.125491	0.365167	0.115215	0.16811	0.379128	0.310354	0.0511391	0.583038
ENSG00000271503	CCL5	C-C motif chemokine ligand 5 [Source:HGNC Symbol;Acc:HGNC:10632]	6352	0.0588207	0.623946	0.486752	0.0781757	0.214128	0.0688149	0.107356	0.453282	-0.0312289	0.826097	0.641548	0.0555964	0.0550312	0.717818	0.695445	0.0652321	0.287319	0.343715	0.724638	0.163051	0.549729	0.0162178	0.0729009	0.75301	0.310256	0.278159	0.60479
ENSG00000065911	MTHFD2	methylenetetrahydrofolate dehydrogenase (NADP+ dependent) 2, methenyltetrahydrofolate cyclohydrolase [Source:HGNC Symbol;Acc:HGNC:7434]	10797	-0.220887	0.063571	0.159128	0.467833	0.049369	0.677951	0.396344	0.0701241	-0.255702	0.0676252	0.259319	0.459663	-0.125416	0.407686	0.580341	0.132605	-0.277641	0.334749	0.717763	0.16756	0.369439	0.102919	0.159279	0.403179	0.310016	0.181649	0.583038
ENSG00000081320	STK17B	serine/threonine kinase 17b [Source:HGNC Symbol;Acc:HGNC:11396]	9262	-0.00788065	0.946763	0.584901	0.0505141	0.198304	0.0868224	0.122126	0.409941	-0.0926265	0.504344	0.536053	0.103054	-0.090553	0.542608	0.63602	0.0939288	-0.118832	0.696039	0.824935	0.0682062	0.561264	0.0128253	0.0681549	0.786338	0.308896	0.0367716	0.583038
ENSG00000152661	GJA1	gap junction protein alpha 1 [Source:HGNC Symbol;Acc:HGNC:4274]	2697	-0.24676	0.0350438	0.116379	0.571885	0.102713	0.3801	0.282686	0.142844	-0.291999	0.0313512	0.195972	0.594864	-0.0376551	0.799064	0.714723	0.0575218	-0.214951	0.475884	0.770618	0.11245	0.502347	0.0282179	0.0898193	0.662584	0.305902	0.0361871	0.583038
ENSG00000106080	FKBP14	FKBP prolyl isomerase 14 [Source:HGNC Symbol;Acc:HGNC:18625]	55033	-0.187158	0.10802	0.207366	0.368591	0.157416	0.172715	0.180934	0.279696	-0.250524	0.0595538	0.24747	0.483156	0.046715	0.746281	0.702467	0.0621872	0.076805	0.792149	0.840663	0.0582196	0.612997	0.00336326	0.0513025	0.919774	0.302836	0.0181689	0.583038
ENSG00000122861	PLAU	plasminogen activator, urokinase [Source:HGNC Symbol;Acc:HGNC:9052]	5328	0.0873928	0.458507	0.421823	0.115564	0.365272	0.00128661	0.0165708	0.913941	0.0387283	0.784348	0.630114	0.0586994	0.246822	0.100234	0.388636	0.385128	0.201287	0.4995	0.781561	0.105803	0.57147	0.00951903	0.0625065	0.824256	0.308284	0.170884	0.583038
ENSG00000064687	ABCA7	ATP binding cassette subfamily A member 7 [Source:HGNC Symbol;Acc:HGNC:37]	10347	0.169217	0.160047	0.25246	0.293991	0.207067	0.0813527	0.118149	0.42216	-0.0669118	0.639811	0.584907	0.0756996	0.0267421	0.861561	0.728079	0.0535208	0.825694	0.00182749	0.22823	0.95315	0.415976	0.0745345	0.135211	0.471681	0.307382	0.0776997	0.583038
ENSG00000165929	TC2N	tandem C2 domains, nuclear [Source:HGNC Symbol;Acc:HGNC:19859]	123036	-0.0855785	0.462065	0.423216	0.114504	0.26032	0.0219404	0.0587275	0.645399	-0.245235	0.0712526	0.262304	0.449906	0.0850707	0.563648	0.643227	0.0894191	0.269737	0.366488	0.732855	0.152334	0.639279	0.00309226	0.0511242	0.925238	0.301305	0.0154711	0.583038
ENSG00000043462	LCP2	lymphocyte cytosolic protein 2 [Source:HGNC Symbol;Acc:HGNC:6529]	3937	0.128733	0.261975	0.323081	0.204062	0.462459	1.95889e-05	0.00514799	0.994648	0.112243	0.409921	0.502299	0.131796	0.345056	0.015947	0.260164	0.696518	-0.0152177	0.958791	0.866302	0.050314	0.61385	0.00370771	0.0527905	0.91305	0.305304	0.0913332	0.583038
ENSG00000204397	CARD16	caspase recruitment domain family member 16 [Source:HGNC Symbol;Acc:HGNC:33701]	114769	-0.0523492	0.655483	0.497327	0.0732715	0.0953385	0.410847	0.295494	0.131182	-0.130511	0.340822	0.472767	0.160362	-0.110268	0.45328	0.597913	0.117363	-0.115129	0.688163	0.824794	0.0692297	0.394536	0.0751743	0.135538	0.469881	0.303948	0.071899	0.583038
ENSG00000150782	IL18	interleukin 18 [Source:HGNC Symbol;Acc:HGNC:5986]	3606	0.0958658	0.400028	0.395691	0.13513	0.0697889	0.536127	0.346605	0.0952587	0.0150724	0.910973	0.663819	0.0514454	-0.078166	0.588067	0.64926	0.0845968	0.243693	0.417814	0.752907	0.131519	0.31738	0.183766	0.21176	0.281361	0.303038	0.0526987	0.583038
ENSG00000204257	HLA-DMA	major histocompatibility complex, class II, DM alpha [Source:HGNC Symbol;Acc:HGNC:4934]	3108	0.123772	0.29775	0.343161	0.182132	0.0902673	0.443378	0.308909	0.120228	0.0869574	0.527342	0.544364	0.0974204	-0.0986044	0.503565	0.62189	0.103254	0.162001	0.570309	0.800718	0.0890039	0.405501	0.065859	0.128433	0.497595	0.299077	0.0244379	0.583038
ENSG00000182866	LCK	LCK proto-oncogene, Src family tyrosine kinase [Source:HGNC Symbol;Acc:HGNC:6524]	3932	0.0169811	0.886681	0.56833	0.0523444	0.312824	0.00675744	0.0339731	0.792192	-0.0949942	0.499452	0.533318	0.104314	0.0853238	0.571586	0.646054	0.0878047	0.0974791	0.752166	0.83303	0.0618371	0.567995	0.0130484	0.0682636	0.783993	0.302606	0.109834	0.583038
ENSG00000107130	NCS1	neuronal calcium sensor 1 [Source:HGNC Symbol;Acc:HGNC:3953]	23413	-0.19134	0.104063	0.204285	0.375681	0.240289	0.0381826	0.0788138	0.557565	-0.251507	0.0611258	0.249112	0.47837	0.128717	0.376144	0.566604	0.144794	-0.0648475	0.823378	0.846757	0.0558857	0.510013	0.0187973	0.0767109	0.730494	0.301615	0.0607652	0.583038
ENSG00000139278	GLIPR1	GLI pathogenesis related 1 [Source:HGNC Symbol;Acc:HGNC:17001]	11010	-0.186012	0.119957	0.220358	0.348655	0.0975312	0.412193	0.295843	0.130701	-0.331196	0.017616	0.162616	0.682702	-0.225175	0.137172	0.420462	0.324878	-0.122437	0.690006	0.824794	0.0689872	0.552264	0.0157722	0.0721332	0.757126	0.298977	0.0268348	0.583038
ENSG00000231389	HLA-DPA1	major histocompatibility complex, class II, DP alpha 1 [Source:HGNC Symbol;Acc:HGNC:4938]	3113	0.0182323	0.877241	0.565514	0.0527553	0.184228	0.112108	0.141244	0.361528	0.0589732	0.669238	0.594361	0.0713636	0.133657	0.365143	0.561231	0.14941	-0.602455	0.0241077	0.395018	0.689902	0.0694941	0.76354	0.455709	0.0607335	0.299974	0.0880514	0.583038
ENSG00000223865	HLA-DPB1	major histocompatibility complex, class II, DP beta 1 [Source:HGNC Symbol;Acc:HGNC:4940]	3115	0.0206121	0.862103	0.562248	0.0534856	0.176987	0.129211	0.152615	0.334519	-0.0235955	0.86484	0.651495	0.0533541	-0.00742558	0.96014	0.752655	0.0502886	-0.00677108	0.982168	0.868983	0.0500587	0.468185	0.0422826	0.105386	0.58717	0.298603	0.0483227	0.583038
ENSG00000089327	FXYD5	FXYD domain containing ion transport regulator 5 [Source:HGNC Symbol;Acc:HGNC:4029]	53827	0.141177	0.220768	0.296117	0.234478	0.241669	0.0325971	0.0726339	0.583771	0.0225873	0.868091	0.652255	0.0531928	0.0350271	0.810062	0.717085	0.0567019	0.330561	0.233755	0.6623	0.233449	0.472591	0.0266899	0.0878051	0.672384	0.294761	0.0140399	0.583038
ENSG00000142871	CCN1	cellular communication network factor 1 [Source:HGNC Symbol;Acc:HGNC:2654]	3491	-0.221306	0.0575673	0.151542	0.485847	0.0195531	0.866673	0.456688	0.0532558	-0.240422	0.0835132	0.278078	0.41996	-0.139684	0.35203	0.55537	0.155181	-0.339318	0.178233	0.616368	0.287607	0.345978	0.0835341	0.142713	0.44759	0.298928	0.152727	0.583038
ENSG00000182004	SNRPE	small nuclear ribonucleoprotein polypeptide E [Source:HGNC Symbol;Acc:HGNC:11161]	6635	0.034428	0.769728	0.536474	0.0599401	-0.189087	0.101633	0.133698	0.380166	-0.0741965	0.600617	0.571563	0.08228	-0.297752	0.046824	0.327583	0.526505	0.22662	0.425104	0.756909	0.128888	-0.310643	0.167481	0.201846	0.300408	0.294037	0.0366356	0.583038
ENSG00000118523	CCN2	cellular communication network factor 2 [Source:HGNC Symbol;Acc:HGNC:2500]	1490	-0.25881	0.0283286	0.10378	0.606289	-0.014347	0.903522	0.466955	0.0516955	-0.272671	0.0520042	0.234359	0.507784	-0.178901	0.23846	0.495806	0.22147	-0.283153	0.253585	0.674333	0.217836	0.242346	0.224504	0.235238	0.241316	0.297084	0.177267	0.583038
ENSG00000099998	GGT5	gamma-glutamyltransferase 5 [Source:HGNC Symbol;Acc:HGNC:4260]	2687	0.00448351	0.970062	0.590833	0.0501624	0.139888	0.234719	0.214148	0.223461	-0.0593312	0.668603	0.594278	0.071452	0.0214283	0.885368	0.734543	0.0524045	0.197881	0.479187	0.772517	0.111485	0.346223	0.114311	0.167278	0.380805	0.296611	0.150423	0.583038
ENSG00000065357	DGKA	diacylglycerol kinase alpha [Source:HGNC Symbol;Acc:HGNC:2849]	1606	0.151588	0.198727	0.28252	0.253665	0.254289	0.0279001	0.0665738	0.60869	-0.0120284	0.931086	0.668689	0.0508643	0.0987096	0.507151	0.623305	0.102342	0.59785	0.035897	0.428485	0.618548	0.383797	0.103038	0.159315	0.402932	0.2963	0.0586315	0.583038
ENSG00000163191	S100A11	S100 calcium binding protein A11 [Source:HGNC Symbol;Acc:HGNC:10488]	6282	-0.0204068	0.859726	0.561601	0.0536084	0.161183	0.155959	0.170521	0.298865	-0.0686403	0.611256	0.574276	0.0803978	0.00210919	0.988384	0.756304	0.0500245	-0.0509036	0.845646	0.850378	0.0544723	0.368885	0.0667464	0.129359	0.494807	0.293814	0.0403937	0.583038
ENSG00000142227	EMP3	epithelial membrane protein 3 [Source:HGNC Symbol;Acc:HGNC:3335]	2014	-0.161012	0.174253	0.264949	0.278039	0.04008	0.733719	0.416381	0.0634525	-0.252134	0.0651164	0.25504	0.466688	-0.167077	0.257931	0.506753	0.207509	0.143614	0.597665	0.807092	0.0835972	0.456077	0.0265819	0.0877172	0.673092	0.294399	0.0845847	0.583038
ENSG00000132274	TRIM22	tripartite motif containing 22 [Source:HGNC Symbol;Acc:HGNC:16379]	10346	0.180397	0.130816	0.230274	0.332172	0.283665	0.0152762	0.0499945	0.696433	0.0465034	0.744915	0.620201	0.0623245	0.224759	0.139156	0.423251	0.322126	0.436145	0.11547	0.55265	0.378658	0.393952	0.0750528	0.135426	0.470221	0.29334	0.0156897	0.583038
ENSG00000087245	MMP2	matrix metallopeptidase 2 [Source:HGNC Symbol;Acc:HGNC:7166]	4313	-0.251436	0.0326765	0.111274	0.583375	0.075162	0.523539	0.342021	0.0981806	-0.241983	0.075301	0.267403	0.43953	0.00883827	0.952242	0.750816	0.0504144	-0.228102	0.445928	0.76086	0.121765	0.312802	0.187656	0.213947	0.277101	0.293939	0.246502	0.598563
ENSG00000181649	PHLDA2	pleckstrin homology like domain family A member 2 [Source:HGNC Symbol;Acc:HGNC:12385]	7262	0.0617723	0.601793	0.480354	0.0819845	0.167077	0.151634	0.167836	0.304175	-0.0607806	0.661384	0.591451	0.0724729	-0.111692	0.45199	0.597206	0.117759	0.26773	0.353328	0.730118	0.158403	0.568152	0.00778586	0.0595167	0.84705	0.291932	0.0254703	0.583038
ENSG00000256235	SMIM3	small integral membrane protein 3 [Source:HGNC Symbol;Acc:HGNC:30248]	85027	-0.163876	0.164317	0.256553	0.289039	0.135348	0.246442	0.220535	0.214795	-0.195481	0.155245	0.35015	0.301224	-0.0235979	0.873767	0.731672	0.0529212	-0.174209	0.554217	0.798471	0.0924484	0.496146	0.0258884	0.0868006	0.677688	0.293589	0.0704105	0.583038
ENSG00000078596	ITM2A	integral membrane protein 2A [Source:HGNC Symbol;Acc:HGNC:6173]	9452	-0.251023	0.0338577	0.114001	0.577563	0.0136397	0.908392	0.4683	0.0515277	-0.239827	0.0808472	0.275245	0.426111	-0.0668488	0.653312	0.673537	0.0736488	-0.414885	0.134502	0.574723	0.346285	0.211517	0.353478	0.300865	0.158332	0.293467	0.106549	0.583038
ENSG00000179144	GIMAP7	GTPase, IMAP family member 7 [Source:HGNC Symbol;Acc:HGNC:22404]	168537	-0.154192	0.192705	0.277926	0.259336	0.0209142	0.85892	0.454301	0.0536505	-0.291681	0.0347335	0.203808	0.577926	-0.242464	0.103837	0.391367	0.378354	0.0422527	0.889436	0.858497	0.0522764	0.540407	0.0170129	0.0741875	0.745839	0.289996	0.00900909	0.583038
ENSG00000214021	TTLL3	tubulin tyrosine ligase like 3 [Source:HGNC Symbol;Acc:HGNC:24483]	26140	-0.103988	0.388663	0.390285	0.139457	0.0716367	0.548772	0.35043	0.0924532	-0.294957	0.0340395	0.2018	0.581292	-0.178401	0.237097	0.495281	0.222499	0.309024	0.306671	0.698955	0.182871	0.444359	0.0589835	0.122371	0.520411	0.289272	0.00726848	0.583038
ENSG00000026751	SLAMF7	SLAM family member 7 [Source:HGNC Symbol;Acc:HGNC:21394]	57823	-0.0886251	0.455486	0.421388	0.116475	0.190075	0.103652	0.135124	0.376432	-0.138524	0.317776	0.458641	0.171802	0.0676234	0.650048	0.672938	0.0741349	-0.0298745	0.922489	0.8609	0.0511141	0.439546	0.0623068	0.125567	0.509105	0.292521	0.36679	0.633204
ENSG00000174652	ZNF266	zinc finger protein 266 [Source:HGNC Symbol;Acc:HGNC:13059]	10781	-0.0216891	0.857764	0.561031	0.0537114	0.19747	0.0965035	0.129544	0.389981	-0.205351	0.147286	0.342257	0.311263	-0.0366321	0.810836	0.717321	0.056646	0.411767	0.164929	0.604763	0.303585	0.60448	0.00641596	0.0561957	0.866946	0.289131	0.0003147	0.583038
ENSG00000173559	NABP1	nucleic acid binding protein 1 [Source:HGNC Symbol;Acc:HGNC:26232]	64859	0.187458	0.100872	0.200864	0.381592	0.297798	0.00764727	0.0360632	0.779355	0.0567642	0.678749	0.596452	0.0700656	0.122923	0.401709	0.578111	0.134803	0.344743	0.205553	0.642755	0.258755	0.523283	0.0108041	0.0651171	0.808753	0.288356	0.00302768	0.583038
ENSG00000111711	GOLT1B	golgi transport 1B [Source:HGNC Symbol;Acc:HGNC:20175]	51026	-0.054738	0.643689	0.49336	0.0750371	-0.0204177	0.861628	0.455233	0.05351	-0.165948	0.224222	0.400892	0.232588	-0.125139	0.393806	0.57521	0.137787	0.227917	0.419608	0.753792	0.130865	0.239393	0.289944	0.267846	0.192954	0.287517	0.0169979	0.583038
ENSG00000109846	CRYAB	crystallin alpha B [Source:HGNC Symbol;Acc:HGNC:2389]	1410	-0.159334	0.185919	0.273752	0.265972	-0.0808724	0.498952	0.331963	0.104281	-0.195073	0.170068	0.362636	0.283924	-0.21252	0.16301	0.441912	0.291949	-0.139352	0.616494	0.811348	0.0801831	0.0560525	0.803262	0.468367	0.057341	0.289172	0.24267	0.597732
ENSG00000108106	UBE2S	ubiquitin conjugating enzyme E2 S [Source:HGNC Symbol;Acc:HGNC:17895]	27338	-0.0738909	0.537846	0.45437	0.0948699	0.0489995	0.679831	0.397018	0.0698732	-0.248361	0.0763955	0.268729	0.436812	-0.13428	0.375629	0.566432	0.145006	0.508464	0.0361801	0.429943	0.617067	0.235977	0.247959	0.246643	0.222104	0.287197	0.0270828	0.583038
ENSG00000188290	HES4	hes family bHLH transcription factor 4 [Source:HGNC Symbol;Acc:HGNC:24149]	57801	-0.0887225	0.456158	0.421388	0.116271	0.109761	0.351	0.269717	0.155242	-0.175327	0.208304	0.391479	0.246058	-0.0764999	0.610267	0.657139	0.0805698	-0.0295264	0.916272	0.860059	0.0513008	0.422426	0.0489036	0.113042	0.558438	0.289083	0.102049	0.583038
ENSG00000129538	RNASE1	ribonuclease A family member 1, pancreatic [Source:HGNC Symbol;Acc:HGNC:10044]	6035	0.244324	0.0390133	0.123664	0.553933	-0.0325436	0.783598	0.431186	0.0587426	0.285646	0.039538	0.215062	0.555981	-0.0933279	0.536277	0.633677	0.0953536	-0.310084	0.303376	0.698144	0.184797	-0.144431	0.556235	0.384929	0.0920053	0.288882	0.178762	0.583038
ENSG00000102007	PLP2	proteolipid protein 2 [Source:HGNC Symbol;Acc:HGNC:9087]	5355	0.262913	0.0177319	0.0809311	0.676052	0.16283	0.141562	0.161368	0.317184	0.179063	0.179685	0.370747	0.273559	-0.0134687	0.925484	0.743159	0.051011	0.398269	0.0940853	0.533279	0.422305	0.36401	0.0547278	0.118465	0.53573	0.286889	0.00719951	0.583038
ENSG00000164107	HAND2	heart and neural crest derivatives expressed 2 [Source:HGNC Symbol;Acc:HGNC:4808]	9464	-0.131976	0.272781	0.329331	0.197053	0.0871831	0.464849	0.318246	0.113684	-0.246302	0.073703	0.266246	0.443564	-0.0559848	0.707714	0.692423	0.0664076	0.141166	0.624444	0.811882	0.0788128	0.263642	0.249557	0.247429	0.220879	0.288272	0.102845	0.583038
ENSG00000084207	GSTP1	glutathione S-transferase pi 1 [Source:HGNC Symbol;Acc:HGNC:4638]	2950	-0.049064	0.676477	0.505504	0.0703221	0.0877527	0.450133	0.311751	0.118113	-0.120317	0.375651	0.488137	0.144997	-0.00228313	0.987522	0.756304	0.0500283	0.0904293	0.716124	0.828025	0.0657446	0.191246	0.334757	0.290924	0.167555	0.286534	0.0463136	0.583038
ENSG00000175505	CLCF1	cardiotrophin like cytokine factor 1 [Source:HGNC Symbol;Acc:HGNC:17412]	23529	-0.207199	0.0670038	0.16313	0.458193	0.0221839	0.844317	0.449828	0.0544579	-0.292407	0.0282921	0.18784	0.611453	-0.216158	0.134085	0.418199	0.329243	-0.0710095	0.78631	0.839323	0.0587028	0.378986	0.0595195	0.123108	0.51855	0.287264	0.072978	0.583038
ENSG00000142552	RCN3	reticulocalbin 3 [Source:HGNC Symbol;Acc:HGNC:21145]	57333	0.0331133	0.78203	0.540369	0.0588737	0.275526	0.0181162	0.0535631	0.673048	-0.0597353	0.674128	0.595263	0.0706901	0.201003	0.184098	0.45503	0.269008	0.272528	0.36956	0.733474	0.150965	0.502561	0.0302875	0.0916162	0.64991	0.286337	0.0341355	0.583038
ENSG00000147408	CSGALNACT1	chondroitin sulfate N-acetylgalactosaminyltransferase 1 [Source:HGNC Symbol;Acc:HGNC:24290]	55790	0.0915783	0.417542	0.403503	0.128817	0.322657	0.00314658	0.023813	0.859129	-0.00662328	0.960529	0.675306	0.050283	0.363578	0.00930312	0.241875	0.764213	0.121199	0.619211	0.811374	0.0797102	0.205865	0.28919	0.267411	0.193427	0.285848	0.0191174	0.583038
ENSG00000143119	CD53	CD53 molecule [Source:HGNC Symbol;Acc:HGNC:1686]	963	0.165319	0.157942	0.250887	0.296484	0.233359	0.0426985	0.0837109	0.538539	0.163535	0.237621	0.409767	0.222103	0.0958548	0.519913	0.627575	0.09919	-0.183185	0.534265	0.792204	0.0970113	0.419005	0.0659519	0.128511	0.497302	0.28688	0.0749464	0.583038
ENSG00000159216	RUNX1	RUNX family transcription factor 1 [Source:HGNC Symbol;Acc:HGNC:10471]	861	0.0397033	0.734489	0.525126	0.0633712	0.333467	0.0031838	0.0239209	0.858251	-0.0556688	0.686255	0.598911	0.0690757	0.221758	0.13011	0.415833	0.335018	0.248473	0.391798	0.742341	0.14154	0.506475	0.0210311	0.0795305	0.712578	0.285175	0.0387164	0.583038
ENSG00000175463	TBC1D10C	TBC1 domain family member 10C [Source:HGNC Symbol;Acc:HGNC:24702]	374403	0.0904243	0.439275	0.414727	0.121538	0.199221	0.0829073	0.119447	0.418611	-0.0899591	0.506963	0.536894	0.102389	-0.0847472	0.559842	0.642908	0.09021	0.441083	0.13848	0.578136	0.340133	0.500983	0.0308372	0.0921403	0.646652	0.283671	0.0484958	0.583038
ENSG00000111716	LDHB	lactate dehydrogenase B [Source:HGNC Symbol;Acc:HGNC:6541]	3945	-0.114302	0.326631	0.359099	0.166803	0.125495	0.276038	0.235203	0.195009	-0.198394	0.14375	0.339233	0.315908	0.0255016	0.861909	0.728277	0.053503	0.0106124	0.970576	0.868559	0.05016	0.269434	0.23614	0.240816	0.231484	0.283178	0.0157548	0.583038
ENSG00000174348	PODN	podocan [Source:HGNC Symbol;Acc:HGNC:23174]	127435	-0.0361316	0.762506	0.535045	0.0605973	0.134226	0.254882	0.225637	0.208863	-0.131655	0.352385	0.479839	0.155021	-0.0135007	0.929326	0.743988	0.0509092	0.248517	0.380913	0.738214	0.146048	0.439874	0.0440299	0.107697	0.579249	0.285625	0.122093	0.583038
ENSG00000140465	CYP1A1	cytochrome P450 family 1 subfamily A member 1 [Source:HGNC Symbol;Acc:HGNC:2595]	1543	0.0104722	0.930529	0.580319	0.0508766	0.137016	0.247163	0.220915	0.214279	0.029739	0.834193	0.643204	0.0550782	0.213986	0.156786	0.436438	0.299345	-0.119936	0.627951	0.812518	0.0782214	-0.105608	0.596468	0.39967	0.0838226	0.285273	0.35084	0.629906
ENSG00000091136	LAMB1	laminin subunit beta 1 [Source:HGNC Symbol;Acc:HGNC:6486]	3912	0.178296	0.129456	0.229675	0.334159	0.197622	0.0888396	0.123708	0.405615	0.106483	0.444518	0.514429	0.120096	0.15775	0.289567	0.522141	0.187433	0.302536	0.313563	0.704075	0.178935	0.113527	0.642925	0.416848	0.0757834	0.282314	0.0418842	0.583038
ENSG00000122641	INHBA	inhibin subunit beta A [Source:HGNC Symbol;Acc:HGNC:6066]	3624	0.0356169	0.758748	0.53349	0.0609485	0.374439	0.000757493	0.0141673	0.93688	0.0519282	0.700477	0.60412	0.067281	0.347829	0.0139476	0.247463	0.714467	0.0187258	0.951029	0.864961	0.0504436	0.542534	0.016887	0.074057	0.74696	0.284937	0.348985	0.629396
ENSG00000079257	LXN	latexin [Source:HGNC Symbol;Acc:HGNC:13347]	56925	-0.00931104	0.93538	0.581771	0.0507581	0.163843	0.146882	0.164859	0.310196	-0.0704168	0.590218	0.567629	0.0841921	0.0714827	0.610027	0.657139	0.0806115	0.229524	0.403275	0.747734	0.136993	0.408765	0.0541829	0.118013	0.537765	0.283845	0.07748	0.583038
ENSG00000123374	CDK2	cyclin dependent kinase 2 [Source:HGNC Symbol;Acc:HGNC:1771]	1017	-0.00971872	0.933342	0.580915	0.0508068	0.142186	0.214154	0.204215	0.239993	-0.1279	0.355029	0.480438	0.153834	0.109675	0.459817	0.601139	0.11538	0.1922	0.522677	0.788973	0.0998185	0.190279	0.431228	0.335084	0.126735	0.282312	0.00132075	0.583038
ENSG00000166507	NDST2	N-deacetylase and N-sulfotransferase 2 [Source:HGNC Symbol;Acc:HGNC:7681]	8509	0.136214	0.244346	0.311974	0.216307	0.23553	0.0402581	0.081185	0.548606	0.121992	0.388563	0.493968	0.139818	0.179089	0.236391	0.494269	0.223035	-0.158895	0.566827	0.799953	0.0897319	0.212196	0.33887	0.292956	0.165466	0.281595	0.00703035	0.583038
ENSG00000173681	BCLAF3	BCLAF1 and THRAP3 family member 3 [Source:HGNC Symbol;Acc:HGNC:27413]	256643	-0.0719609	0.537078	0.454268	0.0950432	0.0514722	0.655582	0.389871	0.073257	-0.236916	0.0826303	0.277486	0.421977	-0.0488959	0.740973	0.701104	0.0627258	0.0500611	0.858399	0.853615	0.053754	0.0852532	0.705909	0.438008	0.0669703	0.282797	0.0555075	0.583038
ENSG00000213214	ARHGEF35	Rho guanine nucleotide exchange factor 35 [Source:HGNC Symbol;Acc:HGNC:33846]	445328	0.0273597	0.820687	0.551182	0.0559447	-0.11258	0.344682	0.266973	0.158129	-0.0362863	0.798867	0.634429	0.057537	-0.304926	0.0424569	0.31794	0.543678	0.175016	0.563837	0.798922	0.0903648	0.174209	0.475113	0.353097	0.112677	0.282565	0.0914557	0.583038
ENSG00000121104	FAM117A	family with sequence similarity 117 member A [Source:HGNC Symbol;Acc:HGNC:24179]	81558	-0.240474	0.0421739	0.129312	0.540663	0.0961317	0.416216	0.297438	0.129281	-0.349319	0.0101527	0.136771	0.754049	-0.139063	0.350116	0.554859	0.156049	0.00891416	0.976253	0.868597	0.0501042	0.439459	0.0553276	0.119081	0.53351	0.281154	0.012188	0.583038
ENSG00000105329	TGFB1	transforming growth factor beta 1 [Source:HGNC Symbol;Acc:HGNC:11766]	7040	0.1888	0.106419	0.205922	0.371429	0.379753	0.000770782	0.0141925	0.936221	0.145178	0.298768	0.447671	0.18212	0.235153	0.11436	0.399996	0.359813	0.0902999	0.767339	0.836354	0.0603784	0.612038	0.00580023	0.0553648	0.876542	0.280723	0.0398544	0.583038
ENSG00000099958	DERL3	derlin 3 [Source:HGNC Symbol;Acc:HGNC:14236]	91319	-0.0623562	0.586772	0.474345	0.0847493	0.241019	0.0315999	0.0714785	0.588817	-0.164595	0.2327	0.406082	0.225869	0.12248	0.408628	0.581033	0.132263	0.270204	0.334674	0.717751	0.167598	0.467556	0.0289672	0.0905075	0.657919	0.281818	0.118327	0.583038
ENSG00000138080	EMILIN1	elastin microfibril interfacer 1 [Source:HGNC Symbol;Acc:HGNC:19880]	11117	0.109852	0.356324	0.374354	0.152865	0.314671	0.00652488	0.0334733	0.795721	0.00582071	0.967318	0.676748	0.0501939	0.174857	0.248363	0.501217	0.214201	0.380578	0.202168	0.642171	0.262075	0.565402	0.0122373	0.0672555	0.792635	0.28071	0.0482812	0.583038
ENSG00000136235	GPNMB	glycoprotein nmb [Source:HGNC Symbol;Acc:HGNC:4462]	10457	0.111097	0.346576	0.370076	0.157256	0.223943	0.0532103	0.0944115	0.499967	0.145716	0.29572	0.44576	0.183856	0.108275	0.469426	0.60502	0.11255	-0.21471	0.451683	0.76271	0.119893	0.411607	0.0623554	0.12558	0.508943	0.281284	0.112905	0.583038
ENSG00000213809	KLRK1	killer cell lectin like receptor K1 [Source:HGNC Symbol;Acc:HGNC:18788]	22914	-0.141587	0.238318	0.30763	0.220746	0.0826475	0.487711	0.327852	0.107254	-0.305993	0.0287958	0.189354	0.60863	-0.119779	0.431851	0.590688	0.124206	0.12897	0.672203	0.821537	0.071408	0.357842	0.13384	0.179776	0.347328	0.281174	0.109118	0.583038
ENSG00000137801	THBS1	thrombospondin 1 [Source:HGNC Symbol;Acc:HGNC:11785]	7057	0.144295	0.216945	0.293733	0.237641	0.340057	0.00266912	0.0219775	0.870958	0.110423	0.42369	0.506738	0.126958	0.264371	0.0710545	0.353933	0.450427	0.155344	0.611541	0.810341	0.081058	0.542746	0.0177329	0.0754813	0.739528	0.280647	0.0413055	0.583038
ENSG00000141756	FKBP10	FKBP prolyl isomerase 10 [Source:HGNC Symbol;Acc:HGNC:18169]	60681	-0.12971	0.269648	0.327465	0.199048	0.0831544	0.475313	0.322295	0.110675	-0.200256	0.139983	0.335361	0.320991	-0.00409115	0.977741	0.755411	0.0500899	0.101178	0.741452	0.832165	0.0629325	0.264442	0.277599	0.26115	0.200915	0.279495	0.0322631	0.583038
ENSG00000213654	GPSM3	G protein signaling modulator 3 [Source:HGNC Symbol;Acc:HGNC:13945]	63940	0.0873457	0.456918	0.421545	0.116042	0.261834	0.0223818	0.0594577	0.64244	0.0179373	0.89646	0.660187	0.0519586	0.0301994	0.837998	0.72221	0.0548438	-0.00498913	0.987115	0.86978	0.0500307	0.633896	0.00444602	0.0538128	0.899386	0.279164	0.0318233	0.583038
ENSG00000035862	TIMP2	TIMP metallopeptidase inhibitor 2 [Source:HGNC Symbol;Acc:HGNC:11821]	7077	-0.0314737	0.791886	0.542721	0.0580669	0.094024	0.424856	0.300988	0.126302	-0.0469988	0.74041	0.619113	0.0627838	0.0221286	0.884312	0.73437	0.0524494	-0.19825	0.499689	0.781561	0.105753	0.159157	0.501648	0.364067	0.105227	0.278224	0.0232189	0.583038
ENSG00000168961	LGALS9	galectin 9 [Source:HGNC Symbol;Acc:HGNC:6570]	3965	0.0179125	0.881313	0.56695	0.0525739	0.241102	0.0398338	0.0807877	0.550407	-0.156107	0.270037	0.43144	0.199474	0.000324976	0.998298	0.757963	0.0500005	0.485746	0.0539116	0.476582	0.538784	0.584905	0.00180764	0.0489002	0.953625	0.279752	0.0517491	0.583038
ENSG00000166881	NEMP1	nuclear envelope integral membrane protein 1 [Source:HGNC Symbol;Acc:HGNC:29001]	23306	-0.128205	0.286572	0.337353	0.188603	0.220378	0.0623512	0.10192	0.471369	-0.293581	0.0374658	0.209456	0.565168	-0.0905427	0.555347	0.640129	0.0911577	0.0263739	0.931983	0.862457	0.0508571	0.638206	0.00413024	0.0538128	0.905113	0.278192	0.0312763	0.583038
ENSG00000148908	RGS10	regulator of G protein signaling 10 [Source:HGNC Symbol;Acc:HGNC:9992]	6001	0.105555	0.37988	0.386218	0.142932	0.213862	0.0701349	0.108537	0.449774	-0.00877001	0.950153	0.673071	0.0504515	-0.0381162	0.799819	0.714734	0.0574639	0.379903	0.188931	0.627331	0.275726	0.699796	0.000593256	0.0421573	0.985267	0.277913	0.0267188	0.583038
ENSG00000204272	NBDY	negative regulator of P-body association [Source:HGNC Symbol;Acc:HGNC:50713]	550643	0.0136663	0.906159	0.573744	0.0516035	0.131857	0.24853	0.221848	0.213305	-0.0639176	0.640745	0.585229	0.0755543	-0.0353651	0.80973	0.717005	0.0567259	0.0689685	0.797679	0.842001	0.0577756	0.410597	0.0454835	0.109245	0.572851	0.277044	0.0154939	0.583038
ENSG00000185880	TRIM69	tripartite motif containing 69 [Source:HGNC Symbol;Acc:HGNC:17857]	140691	-0.102751	0.393894	0.392543	0.137442	0.17178	0.148108	0.1656	0.308623	-0.262135	0.0610369	0.249002	0.478638	0.0196269	0.897245	0.738152	0.0519288	0.190604	0.528109	0.790046	0.0984879	0.376511	0.111197	0.165241	0.386689	0.279123	0.0753928	0.583038
ENSG00000197302	KRBOX5	KRAB box domain containing 5 [Source:HGNC Symbol;Acc:HGNC:26987]	124411	-0.00960038	0.934155	0.581267	0.0507872	0.234644	0.0388592	0.0795835	0.554602	-0.189605	0.175021	0.366384	0.278507	0.0946851	0.52968	0.631085	0.0968732	0.441516	0.0877774	0.526605	0.43707	0.352967	0.0908099	0.148936	0.429848	0.274326	0.0219036	0.583038
ENSG00000138185	ENTPD1	ectonucleoside triphosphate diphosphohydrolase 1 [Source:HGNC Symbol;Acc:HGNC:3363]	953	0.0813675	0.493351	0.436167	0.105747	0.232212	0.045982	0.0872787	0.525714	0.012861	0.927571	0.667696	0.050955	0.119349	0.430133	0.589446	0.124778	-0.0649742	0.792986	0.841248	0.0581515	0.45827	0.0123652	0.0674526	0.791251	0.273374	0.00371591	0.583038
ENSG00000075884	ARHGAP15	Rho GTPase activating protein 15 [Source:HGNC Symbol;Acc:HGNC:21030]	55843	-0.0766564	0.51813	0.446344	0.0994771	0.0990232	0.3984	0.290419	0.135738	-0.184851	0.178853	0.370072	0.274432	-0.0919151	0.535036	0.633525	0.0956368	0.150358	0.595155	0.807092	0.0840708	0.401734	0.0658911	0.128433	0.497494	0.277969	0.154759	0.583038
ENSG00000076003	MCM6	minichromosome maintenance complex component 6 [Source:HGNC Symbol;Acc:HGNC:6949]	4175	0.0740978	0.527772	0.450567	0.0971832	0.25782	0.0244528	0.0624457	0.629111	-0.0816216	0.558661	0.557637	0.0904574	-0.02404	0.872463	0.731658	0.0529825	0.18773	0.539692	0.794912	0.095737	0.541574	0.0183619	0.0761898	0.734148	0.272956	0.0131244	0.583038
ENSG00000140575	IQGAP1	IQ motif containing GTPase activating protein 1 [Source:HGNC Symbol;Acc:HGNC:6110]	8826	-0.105638	0.375784	0.383931	0.144594	0.154797	0.188399	0.189534	0.263516	-0.147384	0.289425	0.442611	0.187517	-0.0274377	0.854594	0.725558	0.0538892	-0.236582	0.401861	0.74727	0.137543	0.363914	0.100006	0.157115	0.409299	0.271256	0.0467288	0.583038
ENSG00000156113	KCNMA1	potassium calcium-activated channel subfamily M alpha 1 [Source:HGNC Symbol;Acc:HGNC:6284]	3778	-0.236835	0.0367996	0.119237	0.563754	-0.214081	0.0569397	0.0975625	0.487823	-0.264923	0.0441851	0.22328	0.536715	-0.333061	0.0175569	0.270522	0.683175	-0.222264	0.436757	0.760107	0.124833	-0.0755934	0.744691	0.450504	0.0625955	0.276807	0.112975	0.583038
ENSG00000188404	SELL	selectin L [Source:HGNC Symbol;Acc:HGNC:10720]	6402	0.0546051	0.649383	0.495126	0.0741747	0.256789	0.0285964	0.0674006	0.604802	-0.0983527	0.47703	0.526378	0.110379	-0.0053685	0.971165	0.754279	0.0501509	0.260427	0.381275	0.738228	0.145895	0.533079	0.0173727	0.0748502	0.742664	0.276424	0.0803352	0.583038
ENSG00000123146	ADGRE5	adhesion G protein-coupled receptor E5 [Source:HGNC Symbol;Acc:HGNC:1711]	976	0.0284307	0.812852	0.548827	0.0564878	0.279329	0.0169065	0.0522433	0.682667	-0.062412	0.656146	0.590405	0.0732317	0.0764548	0.610722	0.657185	0.0804906	0.147875	0.628669	0.812579	0.0781013	0.597711	0.0076838	0.0594933	0.84847	0.275503	0.0570237	0.583038
ENSG00000185630	PBX1	PBX homeobox 1 [Source:HGNC Symbol;Acc:HGNC:8632]	5087	-0.182625	0.122347	0.223117	0.344902	-0.0518855	0.659256	0.391252	0.0727234	-0.388425	0.00500749	0.110368	0.827543	-0.245585	0.104517	0.391455	0.377101	0.27085	0.35802	0.732459	0.156201	0.201405	0.39757	0.319844	0.139228	0.270817	0.0201184	0.583038
ENSG00000152583	SPARCL1	SPARC like 1 [Source:HGNC Symbol;Acc:HGNC:11220]	8404	-0.279838	0.0151173	0.0750087	0.697829	-0.286776	0.0117442	0.0442926	0.730199	-0.28765	0.0308541	0.194984	0.597472	-0.324768	0.0226662	0.285945	0.645905	-0.285182	0.304471	0.698144	0.184154	-0.189721	0.399236	0.320368	0.13857	0.274318	0.252908	0.599907
ENSG00000119699	TGFB3	transforming growth factor beta 3 [Source:HGNC Symbol;Acc:HGNC:11769]	7043	0.0311721	0.787478	0.541411	0.0584226	0.33976	0.00230598	0.0208693	0.88077	-0.0401987	0.773809	0.628277	0.0596003	0.333704	0.0232453	0.287504	0.642082	0.238065	0.338378	0.72048	0.165714	0.453926	0.0153089	0.0718663	0.761483	0.273957	0.106169	0.583038
ENSG00000213190	MLLT11	MLLT11 transcription factor 7 cofactor [Source:HGNC Symbol;Acc:HGNC:16997]	10962	0.163126	0.149412	0.243944	0.306965	0.207669	0.0625639	0.102152	0.470749	0.115019	0.386143	0.492753	0.140769	0.0933979	0.51193	0.625266	0.101145	0.199907	0.433518	0.75955	0.125942	0.331503	0.0969352	0.154094	0.415947	0.27375	0.0635747	0.583038
ENSG00000183943	PRKX	protein kinase cAMP-dependent X-linked catalytic subunit [Source:HGNC Symbol;Acc:HGNC:9441]	5613	-0.121856	0.303078	0.346638	0.179158	0.0348923	0.766277	0.426403	0.0602512	-0.199539	0.142893	0.338503	0.317052	-0.119016	0.417488	0.583649	0.129106	0.0133366	0.963532	0.867312	0.0502458	0.3532	0.120243	0.171594	0.370043	0.273531	0.0637168	0.583038
ENSG00000166147	FBN1	fibrillin 1 [Source:HGNC Symbol;Acc:HGNC:3603]	2200	-0.0928337	0.430797	0.411212	0.124308	0.0977	0.401891	0.291651	0.134438	-0.197372	0.153937	0.348771	0.302837	-0.0238189	0.873413	0.731672	0.0529377	0.017279	0.954389	0.865208	0.0503847	0.29769	0.211549	0.227723	0.253032	0.26953	0.0339693	0.583038
ENSG00000163219	ARHGAP25	Rho GTPase activating protein 25 [Source:HGNC Symbol;Acc:HGNC:28951]	9938	0.0469612	0.697771	0.512367	0.0675728	0.318768	0.0065466	0.0335253	0.795388	-0.0334976	0.814149	0.638055	0.05641	0.123686	0.416918	0.583649	0.129306	0.0659722	0.82758	0.847098	0.0556033	0.489222	0.0328879	0.0950667	0.634868	0.269143	0.00956709	0.583038
ENSG00000140545	MFGE8	milk fat globule EGF and factor V/VIII domain containing [Source:HGNC Symbol;Acc:HGNC:7036]	4240	-0.253434	0.0299419	0.106344	0.597488	-0.108427	0.353068	0.270767	0.154313	-0.278196	0.0360429	0.206558	0.571716	-0.164267	0.253626	0.50391	0.210482	-0.259845	0.344104	0.724638	0.162859	-0.027114	0.903781	0.495902	0.0517205	0.272685	0.133715	0.583038
ENSG00000055163	CYFIP2	cytoplasmic FMR1 interacting protein 2 [Source:HGNC Symbol;Acc:HGNC:13760]	26999	0.0346468	0.767175	0.536082	0.0601698	0.179775	0.118016	0.145331	0.351758	-0.028686	0.839343	0.644418	0.0547624	-0.0499916	0.741587	0.701194	0.0626629	0.0843148	0.771723	0.836354	0.0599768	0.462182	0.0361829	0.0991197	0.617053	0.272665	0.0527584	0.583038
ENSG00000182492	BGN	biglycan [Source:HGNC Symbol;Acc:HGNC:1044]	633	-0.0163972	0.890816	0.569722	0.0521751	0.120839	0.305125	0.249419	0.178034	-0.041471	0.768547	0.627004	0.0600684	0.0593461	0.69429	0.686667	0.0680489	-0.00882028	0.975133	0.868597	0.0501142	0.215365	0.338971	0.292956	0.165415	0.272251	0.186492	0.583038
ENSG00000050165	DKK3	dickkopf WNT signaling pathway inhibitor 3 [Source:HGNC Symbol;Acc:HGNC:2893]	27122	-0.132089	0.272646	0.329329	0.197138	0.0321022	0.788223	0.432579	0.0583619	-0.231639	0.0986132	0.296185	0.388252	-0.148992	0.324802	0.542136	0.168196	0.173865	0.547162	0.797378	0.0940239	0.421041	0.0585605	0.122006	0.52189	0.271578	0.151844	0.583038
ENSG00000117091	CD48	CD48 molecule [Source:HGNC Symbol;Acc:HGNC:1683]	962	0.0121372	0.918187	0.577152	0.0512171	0.248477	0.0312893	0.0710819	0.590414	-0.041533	0.764014	0.625649	0.0604816	0.0767235	0.60458	0.654756	0.0815703	-0.0191725	0.950569	0.864961	0.050452	0.569134	0.0128871	0.0681549	0.785686	0.271557	0.2059	0.584889
ENSG00000117533	VAMP4	vesicle associated membrane protein 4 [Source:HGNC Symbol;Acc:HGNC:12645]	8674	0.0497687	0.675483	0.505125	0.0704563	0.0419942	0.721097	0.411886	0.0648271	-0.0483855	0.729675	0.614415	0.0639166	-0.126963	0.396435	0.576088	0.136785	0.0536534	0.857308	0.853542	0.0538129	0.278126	0.238673	0.241836	0.229425	0.267959	0.00755345	0.583038
ENSG00000049323	LTBP1	latent transforming growth factor beta binding protein 1 [Source:HGNC Symbol;Acc:HGNC:6714]	4052	-0.0992445	0.406748	0.398582	0.132658	0.112426	0.341849	0.26603	0.159448	-0.153204	0.270273	0.431667	0.199322	0.000184878	0.999014	0.758058	0.0500002	0.0251088	0.933455	0.862457	0.0508203	0.36256	0.121984	0.172717	0.366987	0.270839	0.0615656	0.583038
ENSG00000187688	TRPV2	transient receptor potential cation channel subfamily V member 2 [Source:HGNC Symbol;Acc:HGNC:18082]	51393	0.0615243	0.608112	0.482986	0.0808661	0.316406	0.00654072	0.0335248	0.795478	-0.00864024	0.951549	0.673477	0.0504266	0.196211	0.195056	0.462504	0.258216	0.337883	0.179856	0.616772	0.285752	0.449798	0.0199257	0.0778564	0.721277	0.265821	0.0381283	0.583038
ENSG00000110031	LPXN	leupaxin [Source:HGNC Symbol;Acc:HGNC:14061]	9404	0.234566	0.0385783	0.122809	0.555827	0.399395	0.000261276	0.00961892	0.967413	0.263367	0.0462634	0.226814	0.528633	0.2101	0.140639	0.423542	0.320096	-0.0191602	0.945697	0.864235	0.0505457	0.655318	0.000754315	0.0440298	0.980782	0.270112	0.0876878	0.583038
ENSG00000108823	SGCA	sarcoglycan alpha [Source:HGNC Symbol;Acc:HGNC:10805]	6442	-0.176148	0.14254	0.238656	0.315879	-0.0189129	0.874307	0.458849	0.0528899	-0.312791	0.0248913	0.180136	0.631586	-0.249518	0.0978851	0.388636	0.389671	0.233496	0.412698	0.752034	0.13341	0.344902	0.124368	0.174199	0.362877	0.269677	0.191139	0.583038
ENSG00000011422	PLAUR	plasminogen activator, urokinase receptor [Source:HGNC Symbol;Acc:HGNC:9053]	5329	-0.0571739	0.621614	0.48645	0.0785621	0.215088	0.0581518	0.098596	0.484024	-0.0864219	0.518856	0.541128	0.0994456	0.0861134	0.548729	0.637439	0.0925815	-0.0757449	0.799951	0.842518	0.0575971	0.491638	0.029422	0.0909944	0.655131	0.269545	0.139758	0.583038
ENSG00000124126	PREX1	phosphatidylinositol-3,4,5-trisphosphate dependent Rac exchange factor 1 [Source:HGNC Symbol;Acc:HGNC:32594]	57580	0.151943	0.203478	0.285843	0.249328	0.299572	0.0101696	0.0413806	0.747507	0.0938419	0.500608	0.534003	0.104014	0.0873258	0.558833	0.642384	0.0904214	0.0410386	0.894257	0.859064	0.0520808	0.474925	0.0434312	0.106955	0.581934	0.264455	0.0389259	0.583038
ENSG00000108691	CCL2	C-C motif chemokine ligand 2 [Source:HGNC Symbol;Acc:HGNC:10618]	6347	-0.00458037	0.969221	0.590666	0.0501716	0.1695	0.146537	0.164702	0.31064	-0.0807963	0.566499	0.559514	0.088834	0.0958394	0.525674	0.629928	0.0978137	0.112172	0.710123	0.827153	0.0664581	0.313042	0.188269	0.214406	0.276439	0.269482	0.24807	0.598563
ENSG00000136490	LIMD2	LIM domain containing 2 [Source:HGNC Symbol;Acc:HGNC:28142]	80774	0.0351435	0.76681	0.536082	0.0602029	0.293898	0.010699	0.0424556	0.7415	-0.105902	0.44577	0.514815	0.1197	0.0155189	0.917144	0.740863	0.0512511	0.336378	0.243866	0.669829	0.225287	0.767774	6.39858e-05	0.0405977	0.999273	0.26243	0.0406933	0.583038
ENSG00000163001	CFAP36	cilia and flagella associated protein 36 [Source:HGNC Symbol;Acc:HGNC:30540]	112942	-0.113497	0.335285	0.364051	0.162564	0.121014	0.298876	0.246398	0.181498	-0.175695	0.18353	0.374264	0.269586	-0.0397947	0.780035	0.710172	0.0590622	0.0162902	0.955887	0.865674	0.0503598	0.421072	0.0626401	0.126036	0.508	0.268609	0.0508789	0.583038
ENSG00000138772	ANXA3	annexin A3 [Source:HGNC Symbol;Acc:HGNC:541]	306	-0.109445	0.339651	0.366407	0.160482	0.095526	0.399839	0.290968	0.135201	-0.14666	0.268441	0.430536	0.200507	-0.00959015	0.946415	0.749135	0.0505219	-0.123136	0.618736	0.811348	0.0797925	0.322006	0.0943342	0.15199	0.421742	0.26843	0.129287	0.583038
ENSG00000112149	CD83	CD83 molecule [Source:HGNC Symbol;Acc:HGNC:1703]	9308	-0.123339	0.301289	0.345322	0.180149	0.209045	0.0748544	0.11241	0.4377	-0.176668	0.210778	0.393362	0.243887	0.015817	0.917229	0.740863	0.0512485	-0.0460156	0.877877	0.856359	0.0527824	0.604737	0.00532736	0.0552035	0.884228	0.268315	0.285051	0.605481
ENSG00000151468	CCDC3	coiled-coil domain containing 3 [Source:HGNC Symbol;Acc:HGNC:23813]	83643	-0.144653	0.227608	0.300308	0.228976	0.0595937	0.616572	0.376351	0.079409	-0.190731	0.172443	0.364498	0.281305	-0.063135	0.675423	0.680377	0.070514	-0.0609916	0.834089	0.847875	0.0551802	0.287977	0.210095	0.226977	0.254401	0.268171	0.0955668	0.583038
ENSG00000176454	LPCAT4	lysophosphatidylcholine acyltransferase 4 [Source:HGNC Symbol;Acc:HGNC:30059]	254531	0.162716	0.156626	0.249699	0.298061	0.0767089	0.501572	0.332787	0.103605	0.0258417	0.854344	0.648625	0.0539028	0.00958851	0.949327	0.749711	0.0504666	0.42087	0.1132	0.550511	0.382886	0.00417038	0.985014	0.51654	0.0500415	0.261687	0.0202152	0.583038
ENSG00000206337	HCP5	HLA complex P5 [Source:HGNC Symbol;Acc:HGNC:21659]	10866	-0.162018	0.174039	0.26471	0.278269	0.132305	0.262662	0.229567	0.203606	-0.211898	0.13273	0.326712	0.331192	-0.0173491	0.909336	0.740569	0.0514993	-0.326073	0.257603	0.676466	0.214863	0.440796	0.0491004	0.113166	0.557634	0.267828	0.0512938	0.583038
ENSG00000155962	CLIC2	chloride intracellular channel 2 [Source:HGNC Symbol;Acc:HGNC:2063]	1193	-0.194519	0.104258	0.204324	0.375326	-0.0535123	0.653696	0.389398	0.0735338	-0.209048	0.138455	0.333639	0.323093	-0.224738	0.137207	0.420462	0.324828	-0.49834	0.0714885	0.509348	0.480451	0.2079	0.367598	0.307051	0.151838	0.267512	0.0793836	0.583038
ENSG00000169756	LIMS1	LIM zinc finger domain containing 1 [Source:HGNC Symbol;Acc:HGNC:6616]	3987	0.0394227	0.737264	0.526205	0.0630802	0.354064	0.00175312	0.0187009	0.89749	-0.019481	0.886638	0.657308	0.0523511	0.256881	0.0758882	0.360776	0.438067	0.0949839	0.756965	0.834124	0.0613641	0.594639	0.00821661	0.0600996	0.841159	0.266308	0.0517314	0.583038
ENSG00000132465	JCHAIN	joining chain of multimeric IgA and IgM [Source:HGNC Symbol;Acc:HGNC:5713]	3512	-0.0888261	0.420731	0.404957	0.127712	0.226553	0.0359312	0.0764315	0.567736	-0.130257	0.304535	0.452185	0.178899	0.249146	0.064452	0.350512	0.468588	-0.0192571	0.946341	0.864358	0.0505328	0.245474	0.279402	0.2621	0.199723	0.266289	0.329122	0.623512
ENSG00000232956	SNHG15	small nucleolar RNA host gene 15 [Source:HGNC Symbol;Acc:HGNC:27797]	285958	-0.297791	0.0120398	0.0674379	0.727126	-0.0202493	0.865353	0.456367	0.0533213	-0.379831	0.00544911	0.113126	0.819775	-0.194971	0.193199	0.460918	0.259996	-0.140041	0.624818	0.811882	0.0787494	0.277395	0.221386	0.233368	0.244059	0.266034	0.06309	0.583038
ENSG00000167460	TPM4	tropomyosin 4 [Source:HGNC Symbol;Acc:HGNC:12013]	7171	0.126596	0.279709	0.332782	0.192742	0.312559	0.00602798	0.0319771	0.803531	0.0819962	0.542716	0.549814	0.0939046	0.197865	0.168015	0.444799	0.28622	0.00353562	0.989628	0.87008	0.0500199	0.482659	0.0172255	0.0746024	0.743958	0.261541	0.0169303	0.583038
ENSG00000101310	SEC23B	SEC23 homolog B, COPII coat complex component [Source:HGNC Symbol;Acc:HGNC:10702]	10483	0.0294947	0.803841	0.54625	0.0571439	0.285973	0.013285	0.0466683	0.714715	-0.1032	0.458836	0.519859	0.115674	0.11848	0.427317	0.588423	0.125724	0.247209	0.415492	0.752134	0.132373	0.518781	0.0242271	0.0839427	0.689064	0.265171	0.0772511	0.583038
ENSG00000187764	SEMA4D	semaphorin 4D [Source:HGNC Symbol;Acc:HGNC:10732]	10507	0.000896906	0.994033	0.595844	0.0500064	0.229648	0.0504048	0.091671	0.509589	-0.111527	0.432589	0.51013	0.123961	0.0351877	0.817674	0.718116	0.0561638	0.0957553	0.755	0.833776	0.0615565	0.449173	0.0563872	0.120036	0.529638	0.260944	0.043907	0.583038
ENSG00000115687	PASK	PAS domain containing serine/threonine kinase [Source:HGNC Symbol;Acc:HGNC:17270]	23178	0.186725	0.113414	0.213353	0.359326	0.286505	0.0131256	0.0464995	0.716258	0.0428311	0.753914	0.623151	0.0614354	-0.0142068	0.922734	0.742522	0.0510873	0.270512	0.314495	0.704075	0.178413	0.468016	0.0221054	0.0810889	0.704415	0.264025	0.0834827	0.583038
ENSG00000106560	GIMAP2	GTPase, IMAP family member 2 [Source:HGNC Symbol;Acc:HGNC:21789]	26157	-0.138761	0.24509	0.312415	0.215769	0.0247668	0.834507	0.446452	0.0550478	-0.243008	0.0795763	0.272508	0.42911	-0.223466	0.133721	0.418194	0.329763	-0.23083	0.445919	0.76086	0.121768	0.336349	0.16011	0.197552	0.309737	0.258651	0.0213094	0.583038
ENSG00000075618	FSCN1	fascin actin-bundling protein 1 [Source:HGNC Symbol;Acc:HGNC:11148]	6624	0.133669	0.265324	0.325147	0.201851	0.367627	0.00150372	0.01739	0.905955	0.0829289	0.556608	0.556736	0.0908903	0.231852	0.122199	0.409497	0.347069	0.0827345	0.780894	0.837546	0.0591647	0.5883	0.00668055	0.0567278	0.862954	0.262586	0.0563925	0.583038
ENSG00000115419	GLS	glutaminase [Source:HGNC Symbol;Acc:HGNC:4331]	2744	0.0196901	0.869978	0.563517	0.0530946	0.238662	0.0424958	0.0835698	0.539357	-0.0738131	0.601755	0.571934	0.0820752	0.0665142	0.660899	0.675348	0.0725424	-0.00224624	0.993739	0.87008	0.0500072	0.532814	0.0116951	0.0662979	0.798599	0.258612	0.0221886	0.583038
ENSG00000156127	BATF	basic leucine zipper ATF-like transcription factor [Source:HGNC Symbol;Acc:HGNC:958]	10538	-0.0647833	0.586754	0.474345	0.0847526	0.120281	0.306681	0.250122	0.177186	-0.212038	0.123251	0.317359	0.345421	-0.0535359	0.718838	0.695445	0.0651163	0.176485	0.558857	0.798749	0.0914343	0.428256	0.0664263	0.12908	0.495809	0.262226	0.159286	0.583038
ENSG00000136167	LCP1	lymphocyte cytosolic protein 1 [Source:HGNC Symbol;Acc:HGNC:6528]	3936	0.232505	0.0439255	0.132148	0.533654	0.354616	0.00159013	0.0178516	0.902944	0.223322	0.0974607	0.29597	0.390503	0.211605	0.143776	0.425486	0.315874	-0.0589129	0.839143	0.848618	0.0548639	0.499269	0.0217454	0.0805452	0.70712	0.262151	0.107689	0.583038
ENSG00000157600	TMEM164	transmembrane protein 164 [Source:HGNC Symbol;Acc:HGNC:26217]	84187	0.105898	0.369294	0.380867	0.147282	-0.147832	0.204196	0.198685	0.248682	0.0352492	0.799345	0.634429	0.0575003	-0.0392549	0.791668	0.713572	0.058102	0.0597987	0.835427	0.847938	0.0550955	-0.370516	0.0972145	0.154313	0.415334	0.261785	0.357029	0.631653
ENSG00000159388	BTG2	BTG anti-proliferation factor 2 [Source:HGNC Symbol;Acc:HGNC:1131]	7832	-0.0795556	0.507706	0.441693	0.102047	0.227797	0.0529786	0.0942399	0.500745	-0.141737	0.318106	0.458871	0.17163	0.0991855	0.515392	0.626099	0.10029	-0.349787	0.23552	0.663225	0.231993	0.406463	0.0802119	0.14003	0.456186	0.258199	0.00280478	0.583038
ENSG00000186470	BTN3A2	butyrophilin subfamily 3 member A2 [Source:HGNC Symbol;Acc:HGNC:1139]	11118	0.008673	0.942285	0.583712	0.0506044	0.151342	0.199543	0.196271	0.252912	-0.131292	0.354102	0.480391	0.154249	-0.0918862	0.545843	0.637284	0.093213	0.319108	0.285674	0.687984	0.195656	0.613669	0.00528919	0.0552035	0.884861	0.261635	0.113047	0.583038
ENSG00000113657	DPYSL3	dihydropyrimidinase like 3 [Source:HGNC Symbol;Acc:HGNC:3015]	1809	0.117222	0.309652	0.349771	0.175584	0.353259	0.0015039	0.01739	0.905949	0.0231093	0.865633	0.651683	0.0533144	0.210721	0.146748	0.427741	0.311962	0.386324	0.181485	0.618713	0.28391	0.717202	0.00037703	0.0405977	0.991336	0.256538	0.02357	0.583038
ENSG00000137331	IER3	immediate early response 3 [Source:HGNC Symbol;Acc:HGNC:5392]	8870	-0.0827113	0.487552	0.434382	0.107297	0.239663	0.0399078	0.0808452	0.550092	-0.133675	0.337399	0.471075	0.161993	0.114009	0.44579	0.595028	0.119693	0.0964688	0.752625	0.83303	0.0617914	0.593477	0.00815642	0.060092	0.841972	0.261079	0.312777	0.616181
ENSG00000183722	LHFPL6	LHFPL tetraspan subfamily member 6 [Source:HGNC Symbol;Acc:HGNC:6586]	10186	-0.154167	0.200151	0.283611	0.252352	0.0571065	0.632824	0.382076	0.0767353	-0.171559	0.225671	0.402102	0.231419	-0.0531561	0.727475	0.69749	0.0641555	-0.255899	0.377707	0.736638	0.147414	0.321782	0.16193	0.198716	0.307389	0.260966	0.0684141	0.583038
ENSG00000164597	COG5	component of oligomeric golgi complex 5 [Source:HGNC Symbol;Acc:HGNC:14857]	10466	-0.0814469	0.490356	0.435102	0.106543	0.0834141	0.475179	0.322291	0.110713	-0.176571	0.214728	0.395442	0.240481	0.0345162	0.821966	0.71905	0.0558711	-0.160613	0.552193	0.798471	0.0928963	0.0746358	0.732806	0.446727	0.0638568	0.25619	0.0135894	0.583038
ENSG00000172716	SLFN11	schlafen family member 11 [Source:HGNC Symbol;Acc:HGNC:26633]	91607	-0.21989	0.0622619	0.157645	0.471631	0.126968	0.279654	0.236986	0.192775	-0.249935	0.0701599	0.261001	0.452797	0.0121243	0.93548	0.745837	0.0507573	-0.248318	0.39184	0.742341	0.141523	0.418029	0.0633055	0.126277	0.505811	0.26056	0.155706	0.583038
ENSG00000100979	PLTP	phospholipid transfer protein [Source:HGNC Symbol;Acc:HGNC:9093]	5360	0.082051	0.488763	0.434566	0.10697	0.141673	0.225678	0.209886	0.230508	0.00033898	0.998047	0.683115	0.0500007	-0.00575537	0.96907	0.754203	0.0501737	0.0434899	0.881634	0.857506	0.0526122	0.292376	0.204192	0.223301	0.260081	0.260432	0.141866	0.583038
ENSG00000166896	ATP23	ATP23 metallopeptidase and ATP synthase assembly factor homolog [Source:HGNC Symbol;Acc:HGNC:29452]	91419	-0.180658	0.132929	0.231799	0.329127	-0.263539	0.0255715	0.0635741	0.622258	-0.204771	0.148058	0.342753	0.310264	-0.328337	0.0288008	0.298208	0.608602	-0.377848	0.115351	0.55265	0.378878	-0.228893	0.244331	0.244705	0.224922	0.260129	0.0773886	0.583038
ENSG00000145730	PAM	peptidylglycine alpha-amidating monooxygenase [Source:HGNC Symbol;Acc:HGNC:8596]	5066	-0.138006	0.251164	0.316363	0.211446	0.139423	0.241204	0.217593	0.218604	-0.122644	0.374809	0.487265	0.145344	0.082724	0.57715	0.646689	0.0867002	-0.323784	0.221423	0.654411	0.244026	0.201808	0.348862	0.298054	0.160539	0.259063	0.156148	0.583038
ENSG00000180096	SEPTIN1	septin 1 [Source:HGNC Symbol;Acc:HGNC:2879]	1731	-0.12445	0.301295	0.345322	0.180146	0.139193	0.242182	0.218237	0.217885	-0.359057	0.010354	0.138191	0.751722	-0.165677	0.27948	0.518839	0.193517	0.383857	0.192717	0.629763	0.271709	0.546678	0.0147019	0.0708781	0.767317	0.259046	0.0578883	0.583038
ENSG00000143889	HNRNPLL	heterogeneous nuclear ribonucleoprotein L like [Source:HGNC Symbol;Acc:HGNC:25127]	92906	-0.0628737	0.596015	0.477958	0.0830301	0.217294	0.0616586	0.101363	0.473404	-0.167435	0.231605	0.405578	0.226721	-0.0131596	0.930471	0.744206	0.0508798	-0.106261	0.723075	0.828025	0.0649411	0.514972	0.0222007	0.0811952	0.703705	0.25537	0.00499592	0.583038
ENSG00000132485	ZRANB2	zinc finger RANBP2-type containing 2 [Source:HGNC Symbol;Acc:HGNC:13058]	9406	-0.0212235	0.85647	0.560862	0.0537801	0.110559	0.339723	0.265354	0.160449	-0.146049	0.2951	0.445758	0.184213	0.0240859	0.872521	0.731658	0.0529797	-0.00879514	0.97513	0.868597	0.0501143	0.0712087	0.75396	0.453172	0.061659	0.254553	0.000255427	0.583038
ENSG00000167797	CDK2AP2	cyclin dependent kinase 2 associated protein 2 [Source:HGNC Symbol;Acc:HGNC:30833]	10263	-0.150462	0.210177	0.28987	0.243406	0.0862896	0.468921	0.319972	0.112499	-0.257367	0.0658181	0.256482	0.464699	-0.113701	0.453096	0.597913	0.117419	0.0929731	0.748258	0.83303	0.0622303	0.43519	0.0495472	0.113303	0.555819	0.258402	0.0861537	0.583038
ENSG00000248275	TRIM52-AS1	TRIM52 antisense RNA 1 (head to head) [Source:HGNC Symbol;Acc:HGNC:49006]	100507602	-0.280448	0.0169548	0.0790986	0.682273	-0.210829	0.071569	0.109896	0.44603	-0.390334	0.00387956	0.104035	0.849418	-0.402205	0.00561307	0.233761	0.816986	-0.0943188	0.758891	0.835438	0.0611773	0.0711389	0.774097	0.459022	0.0597629	0.258302	0.129354	0.583038
ENSG00000108424	KPNB1	karyopherin subunit beta 1 [Source:HGNC Symbol;Acc:HGNC:6400]	3837	0.0144064	0.90241	0.572636	0.051735	0.202312	0.0791559	0.116391	0.427282	-0.0838364	0.541377	0.54908	0.0942032	0.169413	0.247764	0.500798	0.214631	0.284053	0.338061	0.72048	0.165874	0.304614	0.197972	0.220213	0.266285	0.251577	0.01044	0.583038
ENSG00000110848	CD69	CD69 molecule [Source:HGNC Symbol;Acc:HGNC:1694]	969	-0.12481	0.293836	0.341088	0.184361	0.0499019	0.672203	0.394987	0.0709029	-0.168552	0.22721	0.403186	0.230186	-0.136614	0.36225	0.559723	0.150657	-0.273682	0.341457	0.723372	0.16417	0.299756	0.191289	0.216051	0.273212	0.258162	0.265114	0.602508
ENSG00000166927	MS4A7	membrane spanning 4-domains A7 [Source:HGNC Symbol;Acc:HGNC:13378]	58475	0.127361	0.280264	0.333105	0.192402	0.0912133	0.435169	0.305375	0.122869	0.140623	0.302523	0.450662	0.180013	0.0151477	0.917792	0.741071	0.0512315	-0.485809	0.0885591	0.526779	0.435186	0.0227076	0.92451	0.501478	0.0510565	0.257785	0.133318	0.583038
ENSG00000152049	KCNE4	potassium voltage-gated channel subfamily E regulatory subunit 4 [Source:HGNC Symbol;Acc:HGNC:6244]	23704	-0.202849	0.0852694	0.184509	0.413336	0.132373	0.258594	0.227494	0.20633	-0.193133	0.160021	0.354034	0.295462	0.0891388	0.547594	0.637439	0.0928292	-0.172775	0.521078	0.788935	0.100215	0.392703	0.0586395	0.122006	0.521613	0.257723	0.23133	0.59418
ENSG00000110492	MDK	midkine [Source:HGNC Symbol;Acc:HGNC:6972]	4192	-0.104523	0.385516	0.389323	0.140688	0.148458	0.211796	0.202932	0.242007	-0.146176	0.298602	0.447671	0.182214	0.00569134	0.970001	0.754203	0.0501634	-0.0196788	0.947799	0.864712	0.0505042	0.37539	0.108219	0.163341	0.392474	0.256957	0.106151	0.583038
ENSG00000129353	SLC44A2	solute carrier family 44 member 2 [Source:HGNC Symbol;Acc:HGNC:17292]	57153	0.00369849	0.975686	0.59223	0.0501071	0.0824455	0.491681	0.329514	0.10619	-0.0494252	0.727338	0.613791	0.0641705	-0.0301691	0.842635	0.723	0.0545661	0.135468	0.613629	0.810932	0.0806873	0.336343	0.108172	0.163341	0.392567	0.256923	0.162154	0.583038
ENSG00000198034	RPS4X	ribosomal protein S4 X-linked [Source:HGNC Symbol;Acc:HGNC:10424]	6191	-0.148147	0.12925	0.229459	0.334462	-0.0816917	0.399921	0.290968	0.13517	-0.231484	0.0371946	0.208679	0.566401	-0.200494	0.0941043	0.384867	0.397209	-0.0115329	0.965349	0.867456	0.0502219	0.0558714	0.793923	0.46487	0.0580757	0.250502	0.00509014	0.583038
ENSG00000155229	MMS19	MMS19 homolog, cytosolic iron-sulfur assembly component [Source:HGNC Symbol;Acc:HGNC:13824]	64210	0.169922	0.15734	0.250497	0.297204	0.263132	0.0256176	0.0635741	0.621981	0.0176783	0.900969	0.661208	0.0517907	0.0929534	0.540967	0.635264	0.094295	0.484861	0.0782206	0.516441	0.461501	0.433011	0.0486512	0.112919	0.559472	0.250461	0.0108498	0.583038
ENSG00000100376	FAM118A	family with sequence similarity 118 member A [Source:HGNC Symbol;Acc:HGNC:1313]	55007	0.0934439	0.435456	0.413292	0.122775	0.183824	0.119064	0.146216	0.350077	-0.0603096	0.670579	0.594361	0.0711776	0.0764272	0.614894	0.659449	0.0797711	0.602055	0.039115	0.444094	0.602228	0.396477	0.0991197	0.156202	0.411198	0.255699	0.13372	0.583038
ENSG00000213626	LBH	LBH regulator of WNT signaling pathway [Source:HGNC Symbol;Acc:HGNC:29532]	81606	-0.128252	0.286528	0.337353	0.18863	0.251975	0.0326006	0.0726339	0.583754	-0.207433	0.139217	0.334514	0.322042	0.0594383	0.694828	0.686683	0.0679813	0.0661122	0.825859	0.846757	0.055718	0.643472	0.00267288	0.0489752	0.934025	0.255613	0.155688	0.583038
ENSG00000186395	KRT10	keratin 10 [Source:HGNC Symbol;Acc:HGNC:6413]	3858	-0.0943164	0.407829	0.399216	0.132267	-0.0970392	0.389281	0.286846	0.139217	-0.212932	0.114431	0.309962	0.359693	-0.201988	0.163211	0.441912	0.291715	0.257367	0.290657	0.690192	0.192508	0.0614363	0.757884	0.453942	0.0612747	0.255427	0.0895582	0.583038
ENSG00000244509	APOBEC3C	apolipoprotein B mRNA editing enzyme catalytic subunit 3C [Source:HGNC Symbol;Acc:HGNC:17353]	27350	-0.0675243	0.568915	0.467043	0.0882383	0.231521	0.0460853	0.0873886	0.525323	-0.154651	0.272613	0.433818	0.197823	0.0708886	0.64017	0.668029	0.0756436	-0.0833564	0.779106	0.837189	0.05932	0.534572	0.0156477	0.0721332	0.758289	0.249672	0.0275455	0.583038
ENSG00000129757	CDKN1C	cyclin dependent kinase inhibitor 1C [Source:HGNC Symbol;Acc:HGNC:1786]	1028	-0.285994	0.0165134	0.0782167	0.685897	-0.0235381	0.844408	0.449834	0.0544527	-0.332246	0.0163252	0.156958	0.693302	-0.298815	0.0452788	0.323844	0.532424	-0.280951	0.33214	0.715361	0.168904	0.295539	0.201433	0.222006	0.262805	0.25496	0.176884	0.583038
ENSG00000137726	FXYD6	FXYD domain containing ion transport regulator 6 [Source:HGNC Symbol;Acc:HGNC:4030]	53826	-0.306308	0.00917038	0.0590681	0.759432	0.00539531	0.963698	0.481693	0.0502388	-0.314754	0.021085	0.172931	0.656724	-0.0973472	0.513518	0.62544	0.100751	-0.34474	0.246116	0.671608	0.223528	0.230762	0.338637	0.292956	0.165583	0.254839	0.183331	0.583038
ENSG00000080823	MOK	MOK protein kinase [Source:HGNC Symbol;Acc:HGNC:9833]	5891	-0.13565	0.261192	0.32265	0.204584	-0.00670996	0.95536	0.479932	0.0503613	-0.319584	0.0219932	0.173289	0.65044	-0.28602	0.0573021	0.34136	0.490206	0.248728	0.38657	0.74001	0.143681	0.418312	0.0604476	0.123981	0.515363	0.254579	0.0899365	0.583038
ENSG00000100365	NCF4	neutrophil cytosolic factor 4 [Source:HGNC Symbol;Acc:HGNC:7662]	4689	0.289038	0.0132852	0.0703917	0.714713	0.251459	0.0301111	0.0695253	0.596586	0.236586	0.0825796	0.277486	0.422093	0.0334236	0.820995	0.71905	0.0559366	0.176712	0.558414	0.798673	0.0915303	0.684352	0.00127648	0.0473641	0.966822	0.247183	0.0239495	0.583038
ENSG00000050555	LAMC3	laminin subunit gamma 3 [Source:HGNC Symbol;Acc:HGNC:6494]	10319	-0.0563732	0.637606	0.491675	0.0759793	0.121094	0.305297	0.249478	0.17794	-0.219254	0.11856	0.31358	0.35288	0.0143019	0.925008	0.743136	0.0510241	0.453468	0.118104	0.553527	0.373858	0.322203	0.171997	0.204542	0.29492	0.254247	0.15761	0.583038
ENSG00000134046	MBD2	methyl-CpG binding domain protein 2 [Source:HGNC Symbol;Acc:HGNC:6917]	8932	0.143914	0.226987	0.299795	0.229467	0.22635	0.0532344	0.0944115	0.499886	0.303097	0.0299672	0.193268	0.602207	0.282005	0.0606724	0.344334	0.479739	-0.51335	0.0759262	0.513268	0.467783	-0.0319507	0.895737	0.493567	0.0520225	0.253913	0.121195	0.583038
ENSG00000198855	FICD	FIC domain protein adenylyltransferase [Source:HGNC Symbol;Acc:HGNC:18416]	11153	-0.16382	0.17044	0.261436	0.282178	0.131139	0.268248	0.231506	0.19995	-0.203311	0.143534	0.338923	0.316196	0.0142117	0.924605	0.743015	0.0510352	-0.0329155	0.905754	0.859901	0.0516503	0.437999	0.0379873	0.10134	0.607823	0.253751	0.198644	0.584142
ENSG00000184060	ADAP2	ArfGAP with dual PH domains 2 [Source:HGNC Symbol;Acc:HGNC:16487]	55803	0.17674	0.130721	0.230263	0.33231	0.0710333	0.541444	0.348549	0.0940636	0.218094	0.107193	0.302898	0.372248	0.00194135	0.989429	0.756377	0.0500203	-0.0528354	0.857038	0.853542	0.0538275	0.104395	0.658192	0.421824	0.0734389	0.252683	0.156964	0.583038
ENSG00000145777	TSLP	thymic stromal lymphopoietin [Source:HGNC Symbol;Acc:HGNC:30743]	85480	-0.0584409	0.621923	0.48645	0.0785108	0.246697	0.0332022	0.0733141	0.580768	-0.116603	0.402089	0.49865	0.134662	0.0536212	0.719783	0.695576	0.0650093	0.00181641	0.99522	0.87008	0.0500042	0.495015	0.030629	0.0919223	0.647881	0.252188	0.164444	0.583038
ENSG00000081189	MEF2C	myocyte enhancer factor 2C [Source:HGNC Symbol;Acc:HGNC:6996]	4208	0.0598173	0.610454	0.484235	0.0804582	0.0653157	0.57389	0.360346	0.0872435	-0.00125955	0.992754	0.682511	0.0500095	-0.0748994	0.614002	0.659291	0.0799239	0.0363027	0.905826	0.859901	0.0516477	0.164853	0.50264	0.364197	0.104963	0.247047	0.0102824	0.583038
ENSG00000060138	YBX3	Y-box binding protein 3 [Source:HGNC Symbol;Acc:HGNC:2428]	8531	-0.170728	0.153117	0.246565	0.302336	-0.0780313	0.511189	0.336771	0.101178	-0.251694	0.0614547	0.249678	0.477382	-0.1932	0.183267	0.454222	0.269855	-0.0551856	0.837933	0.848558	0.0549387	0.0320287	0.883005	0.489713	0.0525515	0.251367	0.0588876	0.583038
ENSG00000152359	POC5	POC5 centriolar protein [Source:HGNC Symbol;Acc:HGNC:26658]	134359	0.22164	0.0601482	0.1548	0.477912	0.374979	0.00103872	0.015518	0.923952	0.115343	0.409058	0.502299	0.132108	0.321801	0.0290584	0.298208	0.607172	0.212493	0.408664	0.752034	0.134928	0.319441	0.11406	0.167101	0.381275	0.246414	0.0406323	0.583038
ENSG00000037897	METTL1	methyltransferase 1, tRNA methylguanosine [Source:HGNC Symbol;Acc:HGNC:7030]	4234	-0.00119526	0.991938	0.595261	0.0500118	0.13334	0.252792	0.224377	0.210309	-0.104792	0.449307	0.515793	0.118591	0.00209384	0.98877	0.756304	0.0500229	0.342142	0.163848	0.603886	0.304947	0.4295	0.0234983	0.0830867	0.694227	0.246095	0.0269641	0.583038
ENSG00000161544	CYGB	cytoglobin [Source:HGNC Symbol;Acc:HGNC:16505]	114757	-0.106403	0.378731	0.385683	0.143396	0.119267	0.318325	0.255652	0.171019	-0.181737	0.19686	0.383464	0.256506	0.0111888	0.941273	0.74785	0.0506271	0.199498	0.495138	0.779381	0.106988	0.433478	0.0544193	0.118236	0.53688	0.250385	0.221318	0.589863
ENSG00000011465	DCN	decorin [Source:HGNC Symbol;Acc:HGNC:2705]	1634	-0.137734	0.246236	0.312991	0.214944	0.0338725	0.773953	0.428489	0.0595664	-0.150321	0.282968	0.440146	0.191382	-0.046291	0.758638	0.705554	0.0609835	-0.141701	0.600599	0.807537	0.0830493	0.233352	0.278866	0.261898	0.200077	0.250349	0.258975	0.600847
ENSG00000146674	IGFBP3	insulin like growth factor binding protein 3 [Source:HGNC Symbol;Acc:HGNC:5472]	3486	-0.200726	0.092046	0.191696	0.398925	0.166582	0.158597	0.17232	0.295704	-0.173614	0.213059	0.394665	0.241911	0.150351	0.315322	0.537203	0.173087	-0.249491	0.386124	0.74001	0.143865	0.304259	0.183644	0.21166	0.281497	0.250061	0.297844	0.610628
ENSG00000006576	PHTF2	putative homeodomain transcription factor 2 [Source:HGNC Symbol;Acc:HGNC:13411]	57157	0.0549503	0.636688	0.491198	0.0761233	0.276477	0.0146411	0.048987	0.702075	-0.0481115	0.735686	0.616824	0.0632755	0.0826812	0.588038	0.64926	0.0846023	0.261424	0.252999	0.674333	0.218275	0.406494	0.0195716	0.0776066	0.724131	0.24561	0.0317146	0.583038
ENSG00000245532	NEAT1	nuclear paraspeckle assembly transcript 1 [Source:HGNC Symbol;Acc:HGNC:30815]	283131	-0.0535925	0.656971	0.497737	0.0730543	-0.0406328	0.733665	0.416381	0.0634583	-0.189508	0.181918	0.37268	0.27124	-0.0513383	0.737411	0.699246	0.0630948	0.112011	0.705682	0.827153	0.0669982	-0.294401	0.209021	0.226135	0.255421	0.248854	0.0978529	0.583038
ENSG00000168209	DDIT4	DNA damage inducible transcript 4 [Source:HGNC Symbol;Acc:HGNC:24944]	54541	-0.0470352	0.695524	0.51194	0.0678518	0.190743	0.106231	0.137088	0.371765	-0.114471	0.421298	0.506184	0.127781	0.0593519	0.697781	0.687782	0.0676132	0.0904088	0.765446	0.835923	0.0605546	0.471052	0.0412362	0.104565	0.592042	0.248541	0.280061	0.60479
ENSG00000184678	H2BC21	H2B clustered histone 21 [Source:HGNC Symbol;Acc:HGNC:4760]	8349	0.0845146	0.470467	0.427032	0.112054	0.0556782	0.631089	0.381546	0.0770131	-0.110306	0.434377	0.510868	0.123371	-0.110627	0.464579	0.603455	0.113965	0.338057	0.172965	0.615448	0.293765	-0.0120629	0.953168	0.508132	0.0504056	0.247648	0.130035	0.583038
ENSG00000175197	DDIT3	DNA damage inducible transcript 3 [Source:HGNC Symbol;Acc:HGNC:2726]	1649	-0.213121	0.0743516	0.172371	0.438953	0.107012	0.368328	0.277935	0.147688	-0.324786	0.0199395	0.169556	0.664937	-0.0925896	0.543601	0.636288	0.0937082	0.0531818	0.851329	0.851867	0.0541441	0.455253	0.0342039	0.0967693	0.627595	0.247313	0.214567	0.587962
ENSG00000039560	RAI14	retinoic acid induced 14 [Source:HGNC Symbol;Acc:HGNC:14873]	26064	0.083759	0.471122	0.427032	0.111866	0.375663	0.000759067	0.0141673	0.936802	0.028692	0.834584	0.643204	0.0550538	0.286378	0.0484349	0.330199	0.520504	0.10491	0.734639	0.830791	0.0636578	0.659404	0.00288817	0.0499503	0.929462	0.244741	0.0371924	0.583038
ENSG00000204899	MZT1	mitotic spindle organizing protein 1 [Source:HGNC Symbol;Acc:HGNC:33830]	440145	-0.154389	0.191642	0.277307	0.260358	0.0338904	0.773048	0.428275	0.0596458	-0.208797	0.125527	0.319439	0.341905	-0.114429	0.436432	0.593198	0.122697	-0.156365	0.518796	0.788185	0.100786	0.357234	0.0557276	0.119462	0.532041	0.241966	0.020616	0.583038
ENSG00000070669	ASNS	asparagine synthetase (glutamine-hydrolyzing) [Source:HGNC Symbol;Acc:HGNC:753]	440	-0.216045	0.0703628	0.167152	0.449174	0.0349162	0.769554	0.427363	0.0599557	-0.248457	0.0786653	0.271192	0.431287	-0.134746	0.377737	0.566668	0.144142	-0.216163	0.443588	0.76086	0.122537	0.308592	0.166993	0.201457	0.301011	0.246848	0.322122	0.620686
ENSG00000205268	PDE7A	phosphodiesterase 7A [Source:HGNC Symbol;Acc:HGNC:8791]	5150	-0.111072	0.3473	0.370182	0.156924	0.270051	0.0193025	0.0549847	0.664052	-0.29356	0.0331671	0.200261	0.585601	0.0329513	0.826399	0.71953	0.0555766	0.171224	0.577558	0.801898	0.0875174	0.617491	0.00589593	0.0553977	0.875021	0.241914	0.0433529	0.583038
ENSG00000116729	WLS	Wnt ligand secretion mediator [Source:HGNC Symbol;Acc:HGNC:30238]	79971	0.041694	0.709418	0.51714	0.0661679	0.11318	0.30533	0.249478	0.177922	-0.00316772	0.981167	0.680349	0.0500644	0.121215	0.398024	0.577269	0.136183	0.083791	0.756043	0.833843	0.0614542	-0.114267	0.598377	0.400463	0.0834638	0.241567	0.0039482	0.583038
ENSG00000243279	PRAF2	PRA1 domain family member 2 [Source:HGNC Symbol;Acc:HGNC:28911]	11230	-0.0527828	0.656778	0.497737	0.0730824	0.115938	0.322789	0.257461	0.168735	-0.144739	0.295286	0.445758	0.184106	0.0200297	0.892938	0.736581	0.0520951	0.155642	0.606092	0.808826	0.0820395	0.243136	0.312653	0.279958	0.179448	0.238629	0.0240411	0.583038
ENSG00000128917	DLL4	delta like canonical Notch ligand 4 [Source:HGNC Symbol;Acc:HGNC:2910]	54567	0.159561	0.176073	0.266277	0.276099	0.418847	0.000206322	0.00913328	0.972045	0.129753	0.35505	0.480438	0.153825	0.347625	0.018604	0.274297	0.674955	0.0890316	0.755986	0.833843	0.0614598	0.520212	0.0145469	0.0707794	0.768831	0.238163	0.0334035	0.583038
ENSG00000272398	CD24	CD24 molecule [Source:HGNC Symbol;Acc:HGNC:1645]	100133941	0.0603668	0.606931	0.482484	0.0810732	0.152907	0.185944	0.188342	0.265948	-0.0411558	0.764262	0.625725	0.0604588	0.116007	0.429319	0.589133	0.125051	0.396147	0.148401	0.586845	0.325588	0.203583	0.365696	0.306492	0.15269	0.245581	0.114903	0.583038
ENSG00000138378	STAT4	signal transducer and activator of transcription 4 [Source:HGNC Symbol;Acc:HGNC:11365]	6775	0.0522848	0.6553	0.49732	0.0732982	0.263156	0.0212279	0.0574588	0.650268	0.020944	0.881312	0.656406	0.0525793	0.144568	0.334556	0.547076	0.163365	-0.0336222	0.908444	0.859901	0.0515569	0.442895	0.0471192	0.110992	0.56585	0.244769	0.192427	0.583367
ENSG00000087502	ERGIC2	ERGIC and golgi 2 [Source:HGNC Symbol;Acc:HGNC:30208]	51290	0.105535	0.372959	0.382582	0.145756	0.0370964	0.752057	0.421452	0.0615896	-0.0131577	0.925275	0.667027	0.0510168	-0.0867156	0.563611	0.643227	0.0894269	0.52146	0.0764269	0.513268	0.466398	0.18173	0.460392	0.346616	0.117137	0.237538	0.00468364	0.583038
ENSG00000179431	FJX1	four-jointed box kinase 1 [Source:HGNC Symbol;Acc:HGNC:17166]	24147	-0.144252	0.2116	0.290353	0.242176	0.0102826	0.928597	0.473765	0.0509261	-0.174051	0.205825	0.389318	0.248264	-0.0655867	0.65816	0.674567	0.0729381	0.0116439	0.966132	0.867456	0.050212	0.169154	0.440472	0.339036	0.123577	0.244688	0.0646436	0.583038
ENSG00000119888	EPCAM	epithelial cell adhesion molecule [Source:HGNC Symbol;Acc:HGNC:11529]	4072	-0.011037	0.924583	0.578327	0.0510336	0.171754	0.134031	0.156448	0.327559	-0.0423994	0.756274	0.624139	0.0612084	0.0844437	0.563726	0.643227	0.0894031	-0.0136474	0.959748	0.866447	0.0502995	0.3315	0.115375	0.168291	0.378834	0.244523	0.135258	0.583038
ENSG00000184588	PDE4B	phosphodiesterase 4B [Source:HGNC Symbol;Acc:HGNC:8781]	5142	-0.0301473	0.798953	0.545016	0.057514	0.319395	0.00531817	0.0299685	0.815408	-0.0584032	0.675536	0.595576	0.0704986	0.200741	0.176738	0.44927	0.276669	-0.177649	0.562715	0.798922	0.090604	0.5788	0.0108726	0.0651332	0.807956	0.244515	0.14898	0.583038
ENSG00000164761	TNFRSF11B	TNF receptor superfamily member 11b [Source:HGNC Symbol;Acc:HGNC:11909]	4982	0.162917	0.159519	0.252233	0.294612	0.363159	0.00116987	0.0160265	0.918521	0.0294534	0.832192	0.642672	0.0552038	0.309387	0.0346889	0.306123	0.57814	0.524378	0.0640854	0.501684	0.503271	0.467538	0.038295	0.101634	0.606284	0.244307	0.173732	0.583038
ENSG00000196924	FLNA	filamin A [Source:HGNC Symbol;Acc:HGNC:3754]	2316	0.0514807	0.662311	0.499898	0.0722854	0.220763	0.0559381	0.0967353	0.491016	-0.0125932	0.926859	0.667512	0.050974	0.0589542	0.688255	0.684152	0.0688169	0.103695	0.708272	0.827153	0.066682	0.414098	0.0510552	0.114795	0.549795	0.244086	0.0596764	0.583038
ENSG00000163430	FSTL1	follistatin like 1 [Source:HGNC Symbol;Acc:HGNC:3972]	11167	0.0345831	0.76636	0.536082	0.0602437	0.295748	0.00885215	0.039009	0.763407	0.030543	0.827442	0.641914	0.0555085	0.333256	0.0236717	0.287949	0.639311	-0.0612834	0.826443	0.846883	0.0556789	0.320247	0.143276	0.186358	0.332965	0.243635	0.154353	0.583038
ENSG00000198832	SELENOM	selenoprotein M [Source:HGNC Symbol;Acc:HGNC:30397]	140606	-0.191643	0.107691	0.207017	0.369171	0.138183	0.242655	0.218595	0.217539	-0.228234	0.0949182	0.292456	0.395562	0.00537212	0.971051	0.754279	0.0501521	-0.0473967	0.871414	0.856042	0.0530881	0.485658	0.0277983	0.0892575	0.665236	0.243032	0.197491	0.584142
ENSG00000070540	WIPI1	WD repeat domain, phosphoinositide interacting 1 [Source:HGNC Symbol;Acc:HGNC:25471]	55062	0.0587743	0.616205	0.48553	0.0794714	0.258056	0.02414	0.0620162	0.631069	0.0205349	0.881684	0.656457	0.052563	0.189849	0.196352	0.463307	0.256985	0.236183	0.434335	0.75955	0.125661	0.487902	0.034541	0.097151	0.625767	0.242887	0.0689783	0.583038
ENSG00000152556	PFKM	phosphofructokinase, muscle [Source:HGNC Symbol;Acc:HGNC:8877]	5213	-0.0792446	0.494733	0.436526	0.105383	0.0938148	0.413635	0.296446	0.13019	-0.222532	0.0911635	0.289183	0.403274	0.0069689	0.961055	0.752672	0.0502755	0.504698	0.0798793	0.518331	0.457065	0.355787	0.129894	0.17765	0.35366	0.23734	0.0267872	0.583038
ENSG00000213658	LAT	linker for activation of T cells [Source:HGNC Symbol;Acc:HGNC:18874]	27040	0.024727	0.833094	0.5542	0.055136	0.26369	0.0211434	0.0573708	0.650854	-0.049602	0.714045	0.60916	0.0656652	0.065226	0.652908	0.673537	0.0737086	0.105927	0.724794	0.828535	0.0647461	0.567641	0.0105457	0.0645002	0.811785	0.242665	0.117499	0.583038
ENSG00000041982	TNC	tenascin C [Source:HGNC Symbol;Acc:HGNC:5318]	3371	-0.0469574	0.694453	0.511591	0.0679856	0.195441	0.0959537	0.129136	0.391063	-0.0618908	0.659167	0.59106	0.0727921	0.108693	0.469265	0.604983	0.112596	0.0819254	0.784129	0.838553	0.0588873	0.521021	0.0199271	0.0778564	0.721265	0.242599	0.272208	0.602964
ENSG00000126264	HCST	hematopoietic cell signal transducer [Source:HGNC Symbol;Acc:HGNC:16977]	10870	-0.0525929	0.662205	0.499871	0.0723006	0.074413	0.531884	0.344942	0.0962289	-0.103703	0.459047	0.519859	0.115611	-0.0369639	0.80584	0.716297	0.0570106	0.128611	0.671975	0.821537	0.0714402	0.217994	0.369186	0.307864	0.15113	0.242516	0.156252	0.583038
ENSG00000204387	SNHG32	small nucleolar RNA host gene 32 [Source:HGNC Symbol;Acc:HGNC:19078]	50854	-0.173599	0.147483	0.242602	0.309422	0.0106649	0.928752	0.473769	0.0509221	-0.284451	0.0431641	0.22311	0.540801	-0.226567	0.135623	0.419076	0.327055	-0.0618894	0.835043	0.847938	0.0551198	0.32223	0.167436	0.201831	0.300465	0.242363	0.110372	0.583038
ENSG00000145623	OSMR	oncostatin M receptor [Source:HGNC Symbol;Acc:HGNC:8507]	9180	0.268818	0.0206578	0.0869033	0.654251	0.334666	0.00329433	0.0242323	0.855678	0.171377	0.225237	0.401863	0.231768	0.315679	0.0350299	0.306123	0.576504	0.460931	0.0807809	0.518331	0.45469	0.358873	0.0928434	0.150624	0.425134	0.237104	0.0295117	0.583038
ENSG00000139289	PHLDA1	pleckstrin homology like domain family A member 1 [Source:HGNC Symbol;Acc:HGNC:8933]	22822	0.149224	0.208794	0.288699	0.24461	0.377808	0.000962258	0.0153368	0.927276	0.0890276	0.527058	0.544364	0.0974873	0.241706	0.106125	0.392315	0.374172	0.242745	0.388134	0.741026	0.143036	0.601689	0.00307448	0.0511242	0.925602	0.235645	0.0304569	0.583038
ENSG00000167552	TUBA1A	tubulin alpha 1a [Source:HGNC Symbol;Acc:HGNC:20766]	7846	-0.159344	0.180694	0.269558	0.271269	0.143942	0.222005	0.208402	0.233468	-0.149543	0.2842	0.441024	0.190635	0.0117421	0.937731	0.746655	0.0507053	-0.402755	0.176845	0.616368	0.289209	0.518879	0.0239633	0.0834538	0.69092	0.241578	0.08209	0.583038
ENSG00000125124	BBS2	Bardet-Biedl syndrome 2 [Source:HGNC Symbol;Acc:HGNC:967]	583	0.296911	0.0121292	0.0677195	0.726207	0.24013	0.0415221	0.0825534	0.543332	0.161459	0.247785	0.417202	0.214616	0.180957	0.226575	0.487331	0.230694	0.561957	0.046894	0.46798	0.566802	0.282784	0.231227	0.238909	0.23556	0.233382	0.0311216	0.583038
ENSG00000131389	SLC6A6	solute carrier family 6 member 6 [Source:HGNC Symbol;Acc:HGNC:11052]	6533	-0.0320801	0.785101	0.541023	0.0586179	0.212568	0.0652632	0.104278	0.463025	-0.046431	0.737386	0.617612	0.0630973	0.0730581	0.622327	0.661707	0.0785164	-0.113765	0.694018	0.824794	0.0684657	0.451204	0.0405886	0.104249	0.595107	0.241298	0.080333	0.583038
ENSG00000077984	CST7	cystatin F [Source:HGNC Symbol;Acc:HGNC:2479]	8530	-0.0980444	0.406357	0.398581	0.132801	0.057508	0.622968	0.378531	0.0783374	-0.166598	0.230425	0.40495	0.227643	-0.185742	0.211965	0.475869	0.242855	-0.0595673	0.844131	0.85029	0.0545619	0.480647	0.0365641	0.0995812	0.615074	0.240305	0.197006	0.584142
ENSG00000102879	CORO1A	coronin 1A [Source:HGNC Symbol;Acc:HGNC:2252]	11151	0.110332	0.350349	0.371843	0.155536	0.177058	0.128255	0.152169	0.335932	-0.00582584	0.966435	0.676483	0.0502046	-0.0432242	0.770738	0.708547	0.059872	0.194196	0.501706	0.782622	0.105212	0.487521	0.0259241	0.0868729	0.677449	0.240241	0.0598088	0.583038
ENSG00000148180	GSN	gelsolin [Source:HGNC Symbol;Acc:HGNC:4620]	2934	0.0297721	0.805363	0.546542	0.0570306	0.204087	0.0851846	0.121066	0.413523	-0.0611169	0.669791	0.594361	0.0712868	0.0519869	0.735082	0.698735	0.0633392	0.306312	0.313535	0.704075	0.178951	0.529518	0.0219347	0.0806073	0.705695	0.240175	0.15165	0.583038
ENSG00000111215	PRR4	proline rich 4 [Source:HGNC Symbol;Acc:HGNC:18020]	5554	-0.0126317	0.91466	0.57626	0.0513249	0.164898	0.155013	0.170062	0.300014	-0.184036	0.179978	0.371066	0.273252	-0.0198163	0.893558	0.736837	0.0520708	0.0857401	0.757909	0.834536	0.0612724	0.217475	0.326324	0.286762	0.171958	0.240097	0.0692516	0.583038
ENSG00000183696	UPP1	uridine phosphorylase 1 [Source:HGNC Symbol;Acc:HGNC:12576]	7378	-0.0236207	0.841177	0.556181	0.0546426	0.309835	0.00668899	0.0338623	0.793223	-0.120653	0.383277	0.491067	0.141906	0.0804699	0.588079	0.64926	0.0845946	0.120785	0.68366	0.823258	0.0698301	0.64378	0.00226942	0.0489002	0.942898	0.239318	0.0754107	0.583038
ENSG00000147050	KDM6A	lysine demethylase 6A [Source:HGNC Symbol;Acc:HGNC:12637]	7403	-0.0377862	0.705435	0.515851	0.0666407	0.180997	0.0647421	0.103947	0.464494	-0.0841793	0.46953	0.524034	0.11252	0.110244	0.376329	0.566668	0.144719	0.116817	0.658972	0.819459	0.0733228	0.381033	0.0614744	0.124832	0.511886	0.232523	0.0130496	0.583038
ENSG00000196923	PDLIM7	PDZ and LIM domain 7 [Source:HGNC Symbol;Acc:HGNC:22958]	9260	0.248094	0.0313387	0.109178	0.590159	0.341563	0.00241203	0.02113	0.877822	0.147899	0.283488	0.440615	0.191066	0.219705	0.135507	0.419007	0.327219	0.472979	0.0688525	0.507898	0.48832	0.547849	0.00554688	0.0553648	0.880624	0.227459	0.0233973	0.583038
ENSG00000156136	DCK	deoxycytidine kinase [Source:HGNC Symbol;Acc:HGNC:2704]	1633	0.0216865	0.856586	0.560867	0.0537739	0.185566	0.115521	0.14351	0.355825	-0.0928743	0.513024	0.538913	0.100873	-0.0709275	0.641389	0.668346	0.0754543	0.0275311	0.927993	0.862117	0.0509609	0.526085	0.0210925	0.079579	0.712104	0.225452	0.00591901	0.583038
ENSG00000173917	HOXB2	homeobox B2 [Source:HGNC Symbol;Acc:HGNC:5113]	3212	0.0158785	0.895181	0.570801	0.0520035	0.0965617	0.417185	0.297705	0.128942	-0.0735848	0.605833	0.572495	0.0813479	-0.110786	0.468056	0.604377	0.112947	0.197579	0.517317	0.787923	0.101158	0.460811	0.0493673	0.113268	0.556549	0.237972	0.139944	0.583038
ENSG00000126947	ARMCX1	armadillo repeat containing X-linked 1 [Source:HGNC Symbol;Acc:HGNC:18073]	51309	-0.182884	0.126293	0.226828	0.338863	0.123128	0.299867	0.246898	0.180942	-0.211507	0.12806	0.321879	0.338067	-0.00145386	0.992281	0.756906	0.0500108	-0.240933	0.374353	0.734722	0.148861	0.343795	0.106841	0.162303	0.395206	0.237868	0.167161	0.583038
ENSG00000196663	TECPR2	tectonin beta-propeller repeat containing 2 [Source:HGNC Symbol;Acc:HGNC:19957]	9895	0.0490735	0.680174	0.506854	0.0698277	0.122116	0.298567	0.246249	0.181672	-0.235036	0.0905666	0.288552	0.404528	0.0814055	0.588076	0.64926	0.084595	0.656925	0.0150676	0.363358	0.763785	0.105453	0.654957	0.420759	0.0739241	0.225262	0.0487277	0.583038
ENSG00000116497	S100PBP	S100P binding protein [Source:HGNC Symbol;Acc:HGNC:25768]	64766	0.0724878	0.546677	0.458066	0.0929093	0.309147	0.00811581	0.037236	0.772974	-0.0976044	0.49379	0.530656	0.1058	0.106924	0.484223	0.61091	0.10838	0.340197	0.260314	0.677932	0.21289	0.596856	0.00802343	0.0598796	0.843781	0.224689	0.00736605	0.583038
ENSG00000064547	LPAR2	lysophosphatidic acid receptor 2 [Source:HGNC Symbol;Acc:HGNC:3168]	9170	-0.094837	0.421856	0.40525	0.127326	0.146095	0.209867	0.201808	0.243675	-0.234601	0.0857302	0.281647	0.414982	-0.0946646	0.521679	0.628508	0.098765	0.0329566	0.915158	0.860059	0.0513358	0.479254	0.0417497	0.104933	0.589639	0.237281	0.164533	0.583038
ENSG00000103187	COTL1	coactosin like F-actin binding protein 1 [Source:HGNC Symbol;Acc:HGNC:18304]	23406	0.197432	0.0956087	0.195459	0.391745	0.148401	0.206973	0.200233	0.24621	0.104865	0.457156	0.51953	0.116181	-0.0476949	0.75276	0.704574	0.0615474	0.323516	0.276886	0.685947	0.20139	0.420176	0.0714274	0.132919	0.48063	0.22411	0.0204837	0.583038
ENSG00000164211	STARD4	StAR related lipid transfer domain containing 4 [Source:HGNC Symbol;Acc:HGNC:18058]	134429	-0.00676016	0.953746	0.586288	0.0503879	0.326862	0.00370238	0.0255143	0.846582	-0.0688574	0.612742	0.574525	0.0801407	0.159788	0.271341	0.513482	0.198636	0.140652	0.644593	0.816836	0.0755203	0.653587	0.00272059	0.0489752	0.933004	0.236355	0.0594422	0.583038
ENSG00000198018	ENTPD7	ectonucleoside triphosphate diphosphohydrolase 7 [Source:HGNC Symbol;Acc:HGNC:19745]	57089	0.0129814	0.912008	0.575195	0.0514089	0.228741	0.0465726	0.0879952	0.523487	-0.0644932	0.632674	0.583028	0.076827	0.107432	0.456975	0.600002	0.116236	0.295577	0.28042	0.686603	0.199055	0.60199	0.00233464	0.0489002	0.941434	0.223773	0.0468473	0.583038
ENSG00000168386	FILIP1L	filamin A interacting protein 1 like [Source:HGNC Symbol;Acc:HGNC:24589]	11259	-0.125624	0.290472	0.339363	0.186309	0.0869961	0.460069	0.316359	0.115097	-0.140041	0.311747	0.455834	0.174983	-0.106741	0.472729	0.606989	0.111599	-0.326546	0.240007	0.666477	0.228351	0.346698	0.116241	0.168922	0.377242	0.235772	0.0845819	0.583038
ENSG00000115295	CLIP4	CAP-Gly domain containing linker protein family member 4 [Source:HGNC Symbol;Acc:HGNC:26108]	79745	0.0296952	0.801862	0.545677	0.0572925	0.200461	0.0842812	0.120317	0.415526	-0.0297549	0.832638	0.642907	0.0551757	0.0936897	0.534157	0.633387	0.0958381	0.0850011	0.771045	0.836354	0.0600382	0.242878	0.29554	0.271061	0.189495	0.235753	0.101838	0.583038
ENSG00000121966	CXCR4	C-X-C motif chemokine receptor 4 [Source:HGNC Symbol;Acc:HGNC:2561]	7852	-0.0375027	0.750165	0.530648	0.0617746	0.252184	0.0282985	0.0671917	0.606456	-0.0177351	0.896005	0.660094	0.051976	0.110422	0.446658	0.595061	0.11942	-0.237319	0.407694	0.751687	0.135297	0.536942	0.0120359	0.0667466	0.794832	0.235744	0.225709	0.590134
ENSG00000196724	ZNF418	zinc finger protein 418 [Source:HGNC Symbol;Acc:HGNC:20647]	147686	-0.103388	0.388412	0.390231	0.139554	-0.147034	0.214006	0.204108	0.240118	-0.167355	0.236144	0.408634	0.223224	-0.248414	0.0991386	0.388636	0.387234	-0.113645	0.710579	0.827153	0.0664032	-0.049368	0.841786	0.478836	0.0547027	0.223611	0.0218397	0.583038
ENSG00000140092	FBLN5	fibulin 5 [Source:HGNC Symbol;Acc:HGNC:3602]	10516	-0.128982	0.282101	0.334328	0.191284	-0.0352062	0.767336	0.426681	0.0601552	-0.165979	0.235869	0.408553	0.223433	-0.141616	0.346272	0.554379	0.157813	-0.0269199	0.924195	0.861372	0.0510654	0.223843	0.319771	0.283365	0.175492	0.235623	0.257781	0.600847
ENSG00000187837	H1-2	H1.2 linker histone, cluster member [Source:HGNC Symbol;Acc:HGNC:4716]	3006	0.0477546	0.693761	0.511534	0.0680724	0.0329217	0.783844	0.431218	0.0587221	-0.0881182	0.530481	0.545316	0.0966867	-0.104516	0.487399	0.612349	0.107513	0.148633	0.626228	0.812232	0.078511	0.00120944	0.996092	0.518971	0.0500028	0.23458	0.0845193	0.583038
ENSG00000067225	PKM	pyruvate kinase M1/2 [Source:HGNC Symbol;Acc:HGNC:9021]	5315	-0.108007	0.353788	0.373249	0.153991	0.231069	0.0430233	0.0839553	0.537235	-0.129833	0.330815	0.466487	0.165194	0.149035	0.29734	0.528037	0.182931	-0.0928327	0.744844	0.83303	0.0625797	0.512153	0.0159247	0.072488	0.75571	0.234469	0.12486	0.583038
ENSG00000184489	PTP4A3	protein tyrosine phosphatase 4A3 [Source:HGNC Symbol;Acc:HGNC:9636]	11156	-0.155335	0.180146	0.269024	0.271835	-0.068181	0.553707	0.352306	0.0913922	-0.222865	0.0986687	0.296185	0.388144	-0.176394	0.224842	0.486165	0.232087	-0.0918367	0.752673	0.83303	0.0617866	0.0388669	0.868785	0.486065	0.0532172	0.234178	0.107522	0.583038
ENSG00000010803	SCMH1	Scm polycomb group protein homolog 1 [Source:HGNC Symbol;Acc:HGNC:19003]	22955	-0.0250121	0.832805	0.5542	0.0551541	0.106788	0.36122	0.274662	0.150724	-0.17223	0.218829	0.397533	0.237022	-0.00780617	0.958764	0.75231	0.0503088	0.40129	0.145362	0.585024	0.329929	0.310996	0.162727	0.199135	0.30637	0.223395	0.0147061	0.583038
ENSG00000147526	TACC1	transforming acidic coiled-coil containing protein 1 [Source:HGNC Symbol;Acc:HGNC:11522]	6867	0.0310759	0.795312	0.543745	0.0577962	0.182076	0.122001	0.148186	0.34544	-0.030271	0.830828	0.642078	0.0552904	0.069079	0.648974	0.672209	0.0742962	0.0103837	0.969608	0.868435	0.0501707	0.248868	0.248498	0.246939	0.22169	0.223104	0.0155786	0.583038
ENSG00000196507	TCEAL3	transcription elongation factor A like 3 [Source:HGNC Symbol;Acc:HGNC:28247]	85012	-0.139173	0.247428	0.313807	0.214089	0.110388	0.354435	0.27106	0.153702	-0.174191	0.211148	0.393475	0.243564	-0.0148802	0.921075	0.742222	0.0511348	-0.0820278	0.776995	0.837189	0.0595053	0.301339	0.186444	0.213257	0.278416	0.231783	0.113243	0.583038
ENSG00000189171	S100A13	S100 calcium binding protein A13 [Source:HGNC Symbol;Acc:HGNC:10490]	6284	0.00793596	0.946388	0.584901	0.0505214	-0.020777	0.858755	0.454254	0.0536592	-0.0732654	0.60304	0.571967	0.0818448	-0.0914411	0.544622	0.636759	0.0934821	0.269461	0.345474	0.725883	0.162186	-0.0138144	0.952778	0.508034	0.0504124	0.231417	0.0902371	0.583038
ENSG00000104814	MAP4K1	mitogen-activated protein kinase kinase kinase kinase 1 [Source:HGNC Symbol;Acc:HGNC:6863]	11184	0.137294	0.235239	0.305538	0.223066	0.208284	0.0672393	0.106018	0.457547	-0.0662666	0.630558	0.582471	0.0771672	-0.00105926	0.994282	0.757073	0.0500059	0.67382	0.0147587	0.359886	0.766765	0.511347	0.0232142	0.0828605	0.696271	0.231291	0.142868	0.583038
ENSG00000164692	COL1A2	collagen type I alpha 2 chain [Source:HGNC Symbol;Acc:HGNC:2198]	1278	-0.122349	0.306529	0.348144	0.177269	0.174192	0.139891	0.160382	0.319436	-0.181322	0.194136	0.381019	0.259095	0.0822284	0.584697	0.648898	0.0852373	0.14781	0.608728	0.8093	0.0815621	0.509361	0.0185449	0.0762951	0.732605	0.230835	0.231509	0.59418
ENSG00000138002	IFT172	intraflagellar transport 172 [Source:HGNC Symbol;Acc:HGNC:30391]	26160	-0.247381	0.0320646	0.110315	0.58645	-0.184217	0.10864	0.138749	0.367503	-0.368228	0.00568618	0.114558	0.815759	-0.429515	0.00247098	0.220748	0.882616	0.254553	0.368668	0.733474	0.151361	0.234594	0.302508	0.274856	0.185309	0.23078	0.115057	0.583038
ENSG00000204520	MICA	MHC class I polypeptide-related sequence A [Source:HGNC Symbol;Acc:HGNC:7090]	100507436	0.0622857	0.603389	0.481028	0.0816995	0.234006	0.0461978	0.0874872	0.524898	-0.0682291	0.630427	0.582467	0.0771883	0.102459	0.499843	0.619781	0.104212	0.158268	0.501172	0.782199	0.105354	0.425413	0.0156742	0.0721332	0.758041	0.230718	0.050558	0.583038
ENSG00000255717	SNHG1	small nucleolar RNA host gene 1 [Source:HGNC Symbol;Acc:HGNC:32688]	23642	-0.13268	0.269448	0.327428	0.199177	0.0409163	0.73148	0.415804	0.0636908	-0.203198	0.149204	0.343931	0.308792	-0.159734	0.291852	0.523542	0.186094	-0.136188	0.614596	0.810944	0.0805165	0.266574	0.21317	0.228645	0.251519	0.230603	0.0845005	0.583038
ENSG00000100385	IL2RB	interleukin 2 receptor subunit beta [Source:HGNC Symbol;Acc:HGNC:6009]	3560	-0.0391379	0.743244	0.528151	0.0624654	0.242448	0.0379506	0.0786439	0.55859	-0.079213	0.575227	0.562696	0.0870793	0.100021	0.508911	0.624181	0.101898	-0.192044	0.514077	0.786448	0.10198	0.463506	0.0393745	0.102579	0.600959	0.230116	0.163854	0.583038
ENSG00000134853	PDGFRA	platelet derived growth factor receptor alpha [Source:HGNC Symbol;Acc:HGNC:8803]	5156	0.0449109	0.703925	0.515173	0.066822	0.238355	0.039174	0.0798904	0.553238	0.00176882	0.989899	0.682191	0.0500185	0.2641	0.0742204	0.359185	0.442249	0.172869	0.563038	0.798922	0.0905351	0.293407	0.215673	0.230074	0.249209	0.230007	0.153268	0.583038
ENSG00000011600	TYROBP	transmembrane immune signaling adaptor TYROBP [Source:HGNC Symbol;Acc:HGNC:12449]	7305	0.212622	0.0718445	0.169236	0.445318	0.127576	0.277747	0.236082	0.193949	0.247648	0.0758675	0.268047	0.438119	0.0466227	0.757906	0.705554	0.0610529	-0.277613	0.321015	0.708806	0.174813	0.144867	0.524213	0.372711	0.0994397	0.229964	0.132252	0.583038
ENSG00000163171	CDC42EP3	CDC42 effector protein 3 [Source:HGNC Symbol;Acc:HGNC:16943]	10602	-0.0398474	0.740187	0.527168	0.0627776	0.166542	0.159044	0.172532	0.295175	-0.0772878	0.584196	0.566006	0.085333	0.0382716	0.80055	0.714977	0.0574081	-0.0662165	0.825807	0.846757	0.0557215	0.371714	0.112619	0.166139	0.383981	0.229724	0.148393	0.583038
ENSG00000146072	TNFRSF21	TNF receptor superfamily member 21 [Source:HGNC Symbol;Acc:HGNC:13469]	27242	0.101783	0.371657	0.382074	0.146296	0.351695	0.0013558	0.0168575	0.911325	0.0477559	0.723905	0.613215	0.0645482	0.270133	0.0588896	0.342998	0.485211	0.25138	0.400081	0.747021	0.138238	0.554216	0.0131011	0.0682636	0.783444	0.229372	0.0805417	0.583038
ENSG00000136732	GYPC	glycophorin C (Gerbich blood group) [Source:HGNC Symbol;Acc:HGNC:4704]	2995	-0.218621	0.0669832	0.16313	0.458249	0.0995633	0.402635	0.291861	0.134164	-0.285581	0.0400375	0.216995	0.553824	-0.0767182	0.612142	0.658316	0.0802445	-0.0863355	0.77027	0.836354	0.0601088	0.51768	0.0192253	0.0772337	0.726956	0.228191	0.144364	0.583038
ENSG00000149311	ATM	ATM serine/threonine kinase [Source:HGNC Symbol;Acc:HGNC:795]	472	0.149895	0.199919	0.283448	0.252566	0.259111	0.0237269	0.0613971	0.633684	0.0971532	0.491215	0.529676	0.106485	0.149663	0.321489	0.54048	0.169883	0.0681804	0.814168	0.844962	0.0565307	0.318992	0.161168	0.198382	0.308368	0.227751	0.0888144	0.583038
ENSG00000070950	RAD18	RAD18 E3 ubiquitin protein ligase [Source:HGNC Symbol;Acc:HGNC:18278]	56852	0.0882702	0.457668	0.421739	0.115816	0.0700237	0.551722	0.351576	0.0918167	-0.0306435	0.826333	0.641548	0.0555809	0.00851744	0.954629	0.751442	0.050374	0.0829801	0.781953	0.837799	0.0590734	0.0709994	0.768991	0.457543	0.060226	0.221844	0.0234771	0.583038
ENSG00000145050	MANF	mesencephalic astrocyte derived neurotrophic factor [Source:HGNC Symbol;Acc:HGNC:15461]	7873	-0.0654027	0.586844	0.474345	0.0847356	0.186794	0.114454	0.142912	0.357589	-0.158955	0.257723	0.423171	0.207652	0.0172179	0.909365	0.740569	0.0514984	0.207355	0.470236	0.768512	0.114128	0.554588	0.00896882	0.0615931	0.831238	0.227443	0.209811	0.586923
ENSG00000169604	ANTXR1	ANTXR cell adhesion molecule 1 [Source:HGNC Symbol;Acc:HGNC:21014]	84168	-0.143588	0.2276	0.300308	0.228982	0.0704303	0.550947	0.351392	0.0919831	-0.197026	0.157308	0.351554	0.298713	-0.0408112	0.786138	0.711694	0.0585512	-0.00835556	0.978024	0.868963	0.0500892	0.345268	0.145813	0.187901	0.329278	0.227185	0.0694449	0.583038
ENSG00000087303	NID2	nidogen 2 [Source:HGNC Symbol;Acc:HGNC:13389]	22795	-0.00640835	0.956879	0.587455	0.0503371	0.277233	0.0162585	0.0511152	0.688021	-0.00798433	0.95436	0.674093	0.0503784	0.241936	0.102112	0.391248	0.381568	-0.185506	0.472859	0.769504	0.113344	0.312067	0.124276	0.174144	0.363034	0.227017	0.110022	0.583038
ENSG00000087053	MTMR2	myotubularin related protein 2 [Source:HGNC Symbol;Acc:HGNC:7450]	8898	-0.0630941	0.593561	0.477219	0.0834808	0.149325	0.199995	0.196583	0.252495	-0.103633	0.443793	0.514075	0.120326	0.0288623	0.84258	0.723	0.0545693	-0.0218997	0.932975	0.862457	0.0508322	0.417843	0.0340879	0.0967092	0.628228	0.226845	0.0508143	0.583038
ENSG00000116679	IVNS1ABP	influenza virus NS1A binding protein [Source:HGNC Symbol;Acc:HGNC:16951]	10625	-0.0869764	0.455568	0.421388	0.11645	0.185066	0.106514	0.137249	0.371259	-0.152086	0.273884	0.434215	0.197016	0.0323819	0.828655	0.720235	0.0554298	-0.0762393	0.793578	0.841404	0.0581036	0.460085	0.0376558	0.100894	0.609493	0.226436	0.0885543	0.583038
ENSG00000009413	REV3L	REV3 like, DNA directed polymerase zeta catalytic subunit [Source:HGNC Symbol;Acc:HGNC:9968]	5980	0.153188	0.201439	0.284455	0.251174	0.279788	0.017063	0.05247	0.681396	-0.241923	0.0877031	0.284465	0.410652	-0.0402307	0.793233	0.7138	0.0579773	0.779222	0.00324828	0.238208	0.922073	0.46362	0.0409184	0.104426	0.593541	0.220416	0.0180257	0.583038
ENSG00000169992	NLGN2	neuroligin 2 [Source:HGNC Symbol;Acc:HGNC:14290]	57555	0.00927361	0.935232	0.581734	0.0507616	0.184343	0.0999142	0.13231	0.3834	-0.127572	0.344681	0.475057	0.158551	0.121414	0.401719	0.578111	0.134799	0.121755	0.662736	0.81999	0.0727678	0.224776	0.312341	0.279816	0.179625	0.226369	0.119354	0.583038
ENSG00000111817	DSE	dermatan sulfate epimerase [Source:HGNC Symbol;Acc:HGNC:21144]	29940	-0.073291	0.532577	0.452583	0.0960696	0.236865	0.0393123	0.0800877	0.552641	-0.0824196	0.551102	0.554482	0.0920671	0.152826	0.301049	0.530832	0.180836	-0.294132	0.334564	0.717751	0.167654	0.41116	0.0852195	0.144436	0.443352	0.225638	0.146572	0.583038
ENSG00000254815	LMNTD2-AS1	LMNTD2 antisense RNA 1 [Source:HGNC Symbol;Acc:HGNC:41204]	692247	-0.284816	0.0153181	0.0756631	0.696067	-0.153856	0.190687	0.190874	0.261282	-0.441981	0.00137723	0.0833056	0.916441	-0.327368	0.0303364	0.302747	0.600223	-0.035819	0.901862	0.859901	0.0517903	-0.101504	0.66401	0.423867	0.0725819	0.220254	0.00968593	0.583038
ENSG00000136854	STXBP1	syntaxin binding protein 1 [Source:HGNC Symbol;Acc:HGNC:11444]	6812	0.0912855	0.433125	0.412028	0.123538	0.289409	0.0106525	0.042323	0.742019	-0.00708761	0.959092	0.674867	0.050304	0.100565	0.496323	0.617562	0.105131	0.380626	0.198796	0.637183	0.26545	0.633788	0.00358729	0.0520028	0.915374	0.219695	0.0389407	0.583038
ENSG00000198218	QRICH1	glutamine rich 1 [Source:HGNC Symbol;Acc:HGNC:24713]	54870	0.13339	0.26019	0.322034	0.205255	0.019252	0.869982	0.457687	0.0530944	-0.0970691	0.490603	0.529572	0.106649	-0.0289191	0.848283	0.723911	0.0542394	0.661114	0.0185257	0.379188	0.732767	0.0324203	0.894536	0.493038	0.0520697	0.219336	0.0496923	0.583038
ENSG00000247092	SNHG10	small nucleolar RNA host gene 10 [Source:HGNC Symbol;Acc:HGNC:27510]	283596	0.0636963	0.597949	0.478654	0.0826776	-0.156366	0.188889	0.189823	0.263035	-0.179486	0.205962	0.389318	0.248141	-0.242318	0.109811	0.395257	0.367614	0.438914	0.138464	0.578136	0.340159	-0.231789	0.340746	0.293998	0.164525	0.224955	0.143391	0.583038
ENSG00000068438	FTSJ1	FtsJ RNA 2'-O-methyltransferase 1 [Source:HGNC Symbol;Acc:HGNC:13254]	24140	-0.0838598	0.486831	0.434343	0.107491	0.134324	0.259189	0.227713	0.205928	-0.174868	0.209856	0.393041	0.244692	-0.0368322	0.806434	0.716376	0.0569667	0.103807	0.704244	0.827153	0.0671752	0.472439	0.0213222	0.0800382	0.710339	0.224906	0.102204	0.583038
ENSG00000015133	CCDC88C	coiled-coil domain containing 88C [Source:HGNC Symbol;Acc:HGNC:19967]	440193	0.00368521	0.975248	0.592066	0.050111	0.184908	0.113017	0.141987	0.359992	-0.214004	0.125577	0.319439	0.341829	-0.0578184	0.701769	0.689403	0.0671231	0.436066	0.136571	0.577692	0.343062	0.526329	0.0198543	0.0778564	0.721849	0.218657	0.0249342	0.583038
ENSG00000131871	SELENOS	selenoprotein S [Source:HGNC Symbol;Acc:HGNC:30396]	55829	-0.166646	0.160033	0.25246	0.294007	0.156063	0.183804	0.187191	0.268097	-0.214088	0.119132	0.313809	0.351954	0.0109311	0.941357	0.74785	0.0506253	-0.0848553	0.762107	0.835886	0.0608693	0.483006	0.0216053	0.0805452	0.708181	0.224615	0.109235	0.583038
ENSG00000166387	PPFIBP2	PPFIA binding protein 2 [Source:HGNC Symbol;Acc:HGNC:9250]	8495	-0.0822078	0.493363	0.436167	0.105744	0.263538	0.0245568	0.062573	0.628464	-0.252793	0.0602083	0.248155	0.48115	-0.0106092	0.942116	0.747987	0.0506092	0.223479	0.392185	0.742341	0.141383	0.469916	0.0167962	0.073993	0.747772	0.224221	0.0818064	0.583038
ENSG00000010270	STARD3NL	STARD3 N-terminal like [Source:HGNC Symbol;Acc:HGNC:19169]	83930	0.186699	0.105117	0.204868	0.373767	0.261528	0.0207739	0.0568447	0.653434	0.138993	0.297027	0.446643	0.183109	0.113563	0.427408	0.588423	0.125694	-0.100453	0.697707	0.825478	0.0679938	0.440907	0.0234103	0.0830395	0.694859	0.21835	0.0189419	0.583038
ENSG00000163235	TGFA	transforming growth factor alpha [Source:HGNC Symbol;Acc:HGNC:11765]	7039	0.167399	0.143474	0.239196	0.314641	0.145012	0.200841	0.197012	0.25172	0.162896	0.233177	0.406417	0.2255	0.172208	0.239651	0.496893	0.220577	-0.161225	0.558127	0.798596	0.0915927	-0.00571943	0.979548	0.514548	0.0500773	0.217401	0.0228012	0.583038
ENSG00000114850	SSR3	signal sequence receptor subunit 3 [Source:HGNC Symbol;Acc:HGNC:11325]	6747	0.0460305	0.695963	0.51194	0.0677971	0.234908	0.0414923	0.0825511	0.543455	-0.0702237	0.609393	0.573724	0.0807222	0.103144	0.483388	0.61023	0.108609	0.226078	0.44907	0.762213	0.120738	0.420918	0.0693797	0.131195	0.486725	0.217366	0.00688353	0.583038
ENSG00000136286	MYO1G	myosin IG [Source:HGNC Symbol;Acc:HGNC:13880]	64005	0.0216296	0.85569	0.560665	0.0538219	0.306265	0.00794027	0.0367262	0.775336	-0.0653085	0.640978	0.585309	0.0755181	0.150341	0.315039	0.536847	0.173236	0.150522	0.62315	0.811882	0.0790331	0.597263	0.00788269	0.0597291	0.845712	0.223549	0.310696	0.615013
ENSG00000124574	ABCC10	ATP binding cassette subfamily C member 10 [Source:HGNC Symbol;Acc:HGNC:52]	89845	0.206665	0.0775163	0.17628	0.431191	0.0468886	0.688077	0.39998	0.068795	-0.0557781	0.683476	0.597645	0.0694387	-0.190493	0.191232	0.458797	0.261902	0.739415	0.00308517	0.238208	0.925384	0.227177	0.310398	0.278731	0.180728	0.223446	0.105708	0.583038
ENSG00000074219	TEAD2	TEA domain transcription factor 2 [Source:HGNC Symbol;Acc:HGNC:11715]	8463	-0.0052626	0.9645	0.589293	0.0502284	0.189301	0.103023	0.13473	0.377587	-0.104258	0.459761	0.52014	0.115397	0.1287	0.394175	0.57521	0.137646	0.155247	0.596334	0.807092	0.0838478	0.271516	0.243404	0.244171	0.22565	0.216761	0.0306221	0.583038
ENSG00000131981	LGALS3	galectin 3 [Source:HGNC Symbol;Acc:HGNC:6563]	3958	-0.0854434	0.467242	0.425334	0.112986	0.174951	0.130525	0.153759	0.332595	-0.10524	0.435705	0.511014	0.122935	0.030005	0.836075	0.72221	0.0549615	-0.0213146	0.941841	0.863275	0.0506261	0.575446	0.00689534	0.0573158	0.859769	0.223362	0.209184	0.586861
ENSG00000142765	SYTL1	synaptotagmin like 1 [Source:HGNC Symbol;Acc:HGNC:15584]	84958	-0.0954866	0.430271	0.410921	0.124483	0.0162319	0.892383	0.46381	0.0521127	-0.261359	0.0646297	0.254497	0.468078	-0.278777	0.0659382	0.350776	0.46436	0.236494	0.437356	0.760107	0.124629	0.51308	0.0264589	0.087645	0.673901	0.22315	0.154598	0.583038
ENSG00000164116	GUCY1A1	guanylate cyclase 1 soluble subunit alpha 1 [Source:HGNC Symbol;Acc:HGNC:4685]	2982	-0.070702	0.555158	0.461403	0.0910837	0.00156188	0.989498	0.488281	0.05002	-0.189106	0.174556	0.365982	0.279009	-0.0501827	0.7384	0.699812	0.0629917	0.219537	0.443318	0.76086	0.122627	0.0218366	0.925289	0.501634	0.0510347	0.216242	0.025558	0.583038
ENSG00000138442	WDR12	WD repeat domain 12 [Source:HGNC Symbol;Acc:HGNC:14098]	55759	0.0195263	0.867806	0.563044	0.0532001	0.0135632	0.906974	0.46782	0.0515756	-0.107782	0.435703	0.511014	0.122936	0.135975	0.35842	0.559014	0.152331	0.353517	0.214766	0.650625	0.250042	-0.265333	0.249688	0.247439	0.220779	0.222566	0.159634	0.583038
ENSG00000189320	FAM180A	family with sequence similarity 180 member A [Source:HGNC Symbol;Acc:HGNC:33773]	389558	-0.137239	0.245891	0.312919	0.215191	0.2245	0.0534153	0.0945583	0.499281	-0.140253	0.315574	0.457721	0.172954	0.149966	0.316692	0.538209	0.172368	-0.0124089	0.965597	0.867456	0.0502188	0.474039	0.0289327	0.0905075	0.658132	0.222052	0.295184	0.608382
ENSG00000064490	RFXANK	regulatory factor X associated ankyrin containing protein [Source:HGNC Symbol;Acc:HGNC:9987]	8625	0.214617	0.0720948	0.169598	0.444674	0.116975	0.324857	0.258214	0.167692	0.032759	0.814855	0.638055	0.0563603	-0.167909	0.26054	0.508984	0.205738	0.673898	0.0156179	0.363913	0.758569	0.490194	0.0320333	0.0940103	0.639709	0.221993	0.0936416	0.583038
ENSG00000173209	AHSA2P	activator of HSP90 ATPase homolog 2, pseudogene [Source:HGNC Symbol;Acc:HGNC:20437]	130872	0.121628	0.311286	0.350923	0.174711	0.0677472	0.569406	0.358426	0.0881394	0.05713	0.689279	0.59954	0.0686853	-0.0501723	0.74323	0.701862	0.0624951	0.147272	0.600439	0.807537	0.083079	0.195424	0.385533	0.314716	0.14411	0.215918	0.0391637	0.583038
ENSG00000128595	CALU	calumenin [Source:HGNC Symbol;Acc:HGNC:1458]	813	-0.115768	0.329559	0.361235	0.165352	0.199273	0.0880542	0.123089	0.407288	-0.150962	0.270703	0.431996	0.199045	0.12124	0.410098	0.581564	0.131732	-0.128357	0.664316	0.820273	0.0725373	0.465421	0.0388036	0.10228	0.60376	0.221814	0.0671117	0.583038
ENSG00000072818	ACAP1	ArfGAP with coiled-coil, ankyrin repeat and PH domains 1 [Source:HGNC Symbol;Acc:HGNC:16467]	9744	0.0115487	0.923366	0.578031	0.0510674	0.206824	0.0790107	0.116326	0.427625	-0.0976466	0.489349	0.529202	0.106986	0.115371	0.445773	0.595028	0.119699	0.439247	0.138121	0.578136	0.34068	0.561627	0.0130303	0.0682636	0.784183	0.221686	0.300747	0.611678
ENSG00000117318	ID3	inhibitor of DNA binding 3 [Source:HGNC Symbol;Acc:HGNC:5362]	3399	-0.25061	0.0344527	0.11509	0.574695	-0.091694	0.439168	0.307175	0.121572	-0.235273	0.0931742	0.291378	0.399107	-0.184256	0.222209	0.485358	0.234228	-0.38986	0.16395	0.603912	0.304818	0.0891351	0.700446	0.435841	0.067648	0.221582	0.17589	0.583038
ENSG00000141068	KSR1	kinase suppressor of ras 1 [Source:HGNC Symbol;Acc:HGNC:6465]	8844	0.0333757	0.781176	0.540277	0.0589456	0.237817	0.0430287	0.0839553	0.537214	-0.0489841	0.728532	0.614032	0.0640404	0.181847	0.226884	0.487427	0.230446	0.311938	0.304032	0.698144	0.184411	0.436563	0.0652831	0.127941	0.499423	0.221233	0.108242	0.583038
ENSG00000239713	APOBEC3G	apolipoprotein B mRNA editing enzyme catalytic subunit 3G [Source:HGNC Symbol;Acc:HGNC:17357]	60489	-0.00639911	0.957646	0.587603	0.0503252	0.231055	0.0500813	0.0912836	0.510727	-0.117133	0.41102	0.502617	0.1314	0.0671507	0.660696	0.675295	0.0725716	0.173056	0.563868	0.798922	0.0903582	0.549671	0.0138434	0.0693459	0.775826	0.221097	0.168581	0.583038
ENSG00000027869	SH2D2A	SH2 domain containing 2A [Source:HGNC Symbol;Acc:HGNC:10821]	9047	-0.101223	0.39097	0.390859	0.138563	0.115332	0.322844	0.257461	0.168707	-0.118553	0.398698	0.497635	0.135929	-0.0533489	0.72366	0.69595	0.0645754	-0.25566	0.385511	0.74001	0.14412	0.364425	0.116065	0.168787	0.377564	0.220889	0.272116	0.602964
ENSG00000253797	UTP14C	UTP14C small subunit processome component [Source:HGNC Symbol;Acc:HGNC:20321]	9724	-0.251061	0.0339504	0.114094	0.577113	-0.104956	0.375198	0.280664	0.144834	-0.327566	0.0158223	0.156072	0.697591	-0.196838	0.182726	0.45371	0.270409	-0.00920259	0.974999	0.868597	0.0501155	0.175769	0.454341	0.344398	0.119043	0.220839	0.130788	0.583038
ENSG00000105281	SLC1A5	solute carrier family 1 member 5 [Source:HGNC Symbol;Acc:HGNC:10943]	6510	-0.236313	0.0469844	0.136266	0.521949	-0.00325158	0.978203	0.485252	0.050086	-0.278167	0.0479685	0.228838	0.522224	-0.139239	0.361266	0.559014	0.151084	-0.142899	0.5723	0.800803	0.0885917	0.198123	0.32723	0.28727	0.171477	0.220804	0.168575	0.583038
ENSG00000184922	FMNL1	formin like 1 [Source:HGNC Symbol;Acc:HGNC:1212]	752	0.181201	0.114755	0.214956	0.35709	0.356664	0.00134166	0.0168265	0.911854	0.11473	0.391787	0.495265	0.138564	0.126805	0.377056	0.566668	0.144421	0.179749	0.553973	0.798471	0.0925023	0.681655	0.00148133	0.0489002	0.961616	0.220786	0.0910518	0.583038
ENSG00000231721	LINC-PINT	long intergenic non-protein coding RNA, p53 induced transcript [Source:HGNC Symbol;Acc:HGNC:26885]	378805	0.0890903	0.460736	0.423015	0.114898	0.00462963	0.969141	0.482635	0.0501725	-0.00845681	0.952492	0.673538	0.0504101	-0.167939	0.26737	0.513165	0.201205	0.100838	0.736916	0.831109	0.0634128	-0.0177992	0.941474	0.505031	0.050634	0.220712	0.0614161	0.583038
ENSG00000077232	DNAJC10	DnaJ heat shock protein family (Hsp40) member C10 [Source:HGNC Symbol;Acc:HGNC:24637]	54431	-0.108244	0.36032	0.376376	0.151114	0.208974	0.0723189	0.11041	0.444099	-0.155722	0.251235	0.418915	0.21216	0.100806	0.489677	0.613398	0.106898	0.0362054	0.901475	0.859901	0.0518046	0.578555	0.00660646	0.0566509	0.864064	0.220641	0.0593145	0.583038
ENSG00000205542	TMSB4X	thymosin beta 4 X-linked [Source:HGNC Symbol;Acc:HGNC:11881]	7114	-0.0314454	0.792983	0.542997	0.0579797	0.109581	0.354204	0.271034	0.153805	-0.119199	0.392532	0.495739	0.138277	-0.0903095	0.546101	0.637284	0.0931562	0.0315598	0.91718	0.86031	0.0512726	0.417714	0.0742693	0.134927	0.472431	0.215003	0.0418405	0.583038
ENSG00000062716	VMP1	vacuole membrane protein 1 [Source:HGNC Symbol;Acc:HGNC:29559]	81671	0.1593	0.162348	0.254899	0.291305	0.127825	0.258023	0.227178	0.206716	0.16913	0.213756	0.394774	0.241312	0.122412	0.402613	0.578111	0.134467	-0.311897	0.258696	0.677415	0.214064	-0.251085	0.259563	0.252135	0.213434	0.2149	0.0077353	0.583038
ENSG00000187498	COL4A1	collagen type IV alpha 1 chain [Source:HGNC Symbol;Acc:HGNC:2202]	1282	0.0728559	0.538997	0.455039	0.0946107	0.222581	0.0555311	0.0963766	0.492328	0.0562626	0.683534	0.597645	0.069431	0.117352	0.42674	0.588423	0.12592	-0.0494693	0.871263	0.856042	0.0530955	0.37932	0.110279	0.164606	0.388454	0.220196	0.0653197	0.583038
ENSG00000105122	RASAL3	RAS protein activator like 3 [Source:HGNC Symbol;Acc:HGNC:26129]	64926	0.0190002	0.873538	0.564547	0.0529258	0.361744	0.00163805	0.0181082	0.901311	-0.12096	0.387794	0.493584	0.140119	0.131472	0.381064	0.568259	0.142794	0.395525	0.172677	0.615448	0.294108	0.760373	0.000112874	0.0405977	0.998271	0.220094	0.0959087	0.583038
ENSG00000253368	TRNP1	TMF1 regulated nuclear protein 1 [Source:HGNC Symbol;Acc:HGNC:34348]	388610	-0.0586379	0.613381	0.484924	0.0799532	-0.0752249	0.512161	0.337181	0.100937	-0.142115	0.305566	0.452495	0.178332	-0.129549	0.384019	0.569644	0.141611	0.263407	0.327857	0.712882	0.171146	-0.0577266	0.792901	0.464449	0.0581584	0.219942	0.103277	0.583038
ENSG00000133169	BEX1	brain expressed X-linked 1 [Source:HGNC Symbol;Acc:HGNC:1036]	55859	0.0216787	0.856148	0.56086	0.0537973	0.0116248	0.921735	0.471813	0.0511135	-0.0598233	0.675174	0.595576	0.0705478	-0.13998	0.359001	0.559014	0.152075	0.191403	0.409478	0.752034	0.13462	0.0942082	0.616843	0.406954	0.0801221	0.219795	0.154677	0.583038
ENSG00000147010	SH3KBP1	SH3 domain containing kinase binding protein 1 [Source:HGNC Symbol;Acc:HGNC:13867]	30011	0.162956	0.162297	0.254899	0.291364	0.391521	0.000479642	0.0116931	0.952185	0.122677	0.376422	0.488258	0.14468	0.223701	0.130116	0.415833	0.335009	-0.0101082	0.973722	0.868597	0.0501276	0.614257	0.0058334	0.0553648	0.876013	0.214802	0.0237846	0.583038
ENSG00000134138	MEIS2	Meis homeobox 2 [Source:HGNC Symbol;Acc:HGNC:7001]	4212	-0.175547	0.139666	0.236662	0.319741	0.155948	0.185283	0.187918	0.266608	-0.235322	0.0875169	0.284124	0.411057	0.042618	0.775157	0.709392	0.0594824	-0.0842344	0.777584	0.837189	0.0594534	0.425132	0.063815	0.126864	0.504148	0.219635	0.102324	0.583038
ENSG00000197457	STMN3	stathmin 3 [Source:HGNC Symbol;Acc:HGNC:15926]	50861	-0.180257	0.132885	0.231799	0.32919	0.0130757	0.912813	0.469574	0.0513831	-0.312906	0.0243254	0.178688	0.635135	-0.198206	0.188757	0.457179	0.264333	0.221659	0.447135	0.76091	0.121369	0.505284	0.0217994	0.0805452	0.706713	0.219548	0.056916	0.583038
ENSG00000162613	FUBP1	far upstream element binding protein 1 [Source:HGNC Symbol;Acc:HGNC:4004]	8880	-0.0474614	0.690675	0.510545	0.0684627	0.129392	0.271409	0.233094	0.197923	-0.087851	0.537507	0.548289	0.0950743	0.0160309	0.916505	0.740827	0.0512706	-0.146787	0.593515	0.806359	0.0843826	0.214607	0.328599	0.288018	0.170754	0.214223	0.0363531	0.583038
ENSG00000125731	SH2D3A	SH2 domain containing 3A [Source:HGNC Symbol;Acc:HGNC:16885]	10045	-0.108216	0.361693	0.377218	0.150519	0.192369	0.0994246	0.131873	0.384332	-0.190576	0.173845	0.365444	0.279778	0.0534232	0.723797	0.69595	0.0645602	0.134047	0.631961	0.813243	0.0775547	0.463735	0.0284969	0.09013	0.660837	0.219302	0.16351	0.583038
ENSG00000182952	HMGN4	high mobility group nucleosomal binding domain 4 [Source:HGNC Symbol;Acc:HGNC:4989]	10473	-0.0575249	0.626087	0.48759	0.077824	0.129445	0.26642	0.231213	0.201136	-0.1136	0.405571	0.500884	0.133377	-0.068881	0.638558	0.667969	0.0758953	-0.0817171	0.771506	0.836354	0.0599964	0.507072	0.0154353	0.0720826	0.760287	0.214	0.0286663	0.583038
ENSG00000050405	LIMA1	LIM domain and actin binding 1 [Source:HGNC Symbol;Acc:HGNC:24636]	51474	0.0105271	0.930034	0.58014	0.0508891	0.154427	0.190821	0.190874	0.261152	-0.0954549	0.504523	0.536053	0.103009	-0.128146	0.402694	0.578111	0.134437	0.136708	0.646314	0.817421	0.0752507	0.524784	0.0186358	0.0764558	0.731843	0.213851	0.0272424	0.583038
ENSG00000177054	ZDHHC13	zinc finger DHHC-type palmitoyltransferase 13 [Source:HGNC Symbol;Acc:HGNC:18413]	54503	-0.00157674	0.989371	0.59494	0.0500205	0.200693	0.0839198	0.120127	0.416333	-0.130741	0.33064	0.466411	0.165281	-0.0642254	0.656576	0.674415	0.0731688	0.136022	0.63513	0.813913	0.0770349	0.593375	0.00417197	0.0538128	0.904346	0.213489	0.0203283	0.583038
ENSG00000009790	TRAF3IP3	TRAF3 interacting protein 3 [Source:HGNC Symbol;Acc:HGNC:30766]	80342	0.0751587	0.534581	0.453055	0.0956105	0.192038	0.10654	0.137249	0.371212	-0.0995642	0.483056	0.527575	0.1087	-0.136952	0.367416	0.562251	0.148439	0.458469	0.109573	0.547791	0.389823	0.556369	0.0110889	0.0657852	0.805458	0.218101	0.149629	0.583038
ENSG00000136160	EDNRB	endothelin receptor type B [Source:HGNC Symbol;Acc:HGNC:3180]	1910	-0.115036	0.332876	0.362784	0.163729	0.0769109	0.513471	0.337813	0.100614	-0.0967151	0.485852	0.527948	0.107934	0.0609113	0.682499	0.6823	0.0695672	-0.446102	0.0751291	0.513268	0.470008	0.0327797	0.876729	0.488267	0.0528355	0.21809	0.0943148	0.583038
ENSG00000094963	FMO2	flavin containing dimethylaniline monoxygenase 2 [Source:HGNC Symbol;Acc:HGNC:3770]	2327	-0.0533096	0.658237	0.498343	0.0728706	-0.101677	0.39307	0.287924	0.137756	-0.141439	0.320967	0.460781	0.170151	-0.0854462	0.576832	0.64666	0.0867626	-0.0126874	0.962062	0.867065	0.0502661	-0.200361	0.345506	0.296514	0.16217	0.217678	0.0819396	0.583038
ENSG00000197989	SNHG12	small nucleolar RNA host gene 12 [Source:HGNC Symbol;Acc:HGNC:30062]	85028	-0.205385	0.0824983	0.181764	0.419539	0.00980231	0.933807	0.474714	0.0507956	-0.321973	0.0184201	0.164348	0.676374	-0.215395	0.146428	0.427186	0.312379	-0.0103323	0.972284	0.868597	0.0501419	0.328651	0.158662	0.196425	0.311626	0.217541	0.218354	0.589863
ENSG00000019144	PHLDB1	pleckstrin homology like domain family B member 1 [Source:HGNC Symbol;Acc:HGNC:23697]	23187	-0.128363	0.274733	0.330413	0.195824	0.217446	0.0597596	0.0998001	0.479088	-0.179283	0.18633	0.375461	0.266752	0.168606	0.246918	0.500198	0.215239	-0.104721	0.731087	0.829866	0.064045	0.314641	0.190236	0.215525	0.27433	0.212007	0.0486078	0.583038
ENSG00000240184	PCDHGC3	protocadherin gamma subfamily C, 3 [Source:HGNC Symbol;Acc:HGNC:8716]	5098	0.119636	0.316563	0.353659	0.171933	0.209327	0.0747265	0.11237	0.438018	0.0272676	0.84878	0.646804	0.0542112	0.149276	0.328359	0.5435	0.166411	0.367896	0.217928	0.652604	0.247157	0.248316	0.305662	0.276339	0.183458	0.211888	0.0316973	0.583038
ENSG00000182158	CREB3L2	cAMP responsive element binding protein 3 like 2 [Source:HGNC Symbol;Acc:HGNC:23720]	64764	-0.0803452	0.498491	0.437956	0.1044	0.183292	0.116505	0.144207	0.354211	-0.161622	0.23356	0.406789	0.225204	0.119888	0.410978	0.582241	0.131416	0.151139	0.596579	0.807092	0.0838016	0.339264	0.129489	0.177315	0.354321	0.217172	0.113255	0.583038
ENSG00000125746	EML2	EMAP like 2 [Source:HGNC Symbol;Acc:HGNC:18035]	24139	0.240656	0.0429407	0.130751	0.537566	0.26453	0.024114	0.0620162	0.631232	0.0980434	0.49403	0.530745	0.105736	0.139597	0.362892	0.559849	0.150379	0.562217	0.0521029	0.476582	0.545697	0.340813	0.154166	0.193176	0.317617	0.211483	0.0381234	0.583038
ENSG00000093072	ADA2	adenosine deaminase 2 [Source:HGNC Symbol;Acc:HGNC:1839]	51816	0.309609	0.00772096	0.0540373	0.778335	0.289593	0.011966	0.0445392	0.727888	0.343391	0.012856	0.146569	0.725023	0.150841	0.317394	0.538778	0.172001	-0.0646745	0.801687	0.84262	0.0574622	0.325999	0.10342	0.159633	0.402144	0.216653	0.083958	0.583038
ENSG00000142173	COL6A2	collagen type VI alpha 2 chain [Source:HGNC Symbol;Acc:HGNC:2212]	1292	-0.126805	0.290627	0.339426	0.186219	0.160827	0.174628	0.182113	0.277637	-0.185842	0.185093	0.375461	0.267998	0.0940437	0.533617	0.632987	0.0959621	0.0587325	0.844456	0.85029	0.0545427	0.410994	0.0751813	0.135538	0.469861	0.2166	0.166407	0.583038
ENSG00000169554	ZEB2	zinc finger E-box binding homeobox 2 [Source:HGNC Symbol;Acc:HGNC:14881]	9839	-0.106092	0.371754	0.382118	0.146255	0.179704	0.124543	0.149825	0.341517	-0.130945	0.347931	0.477735	0.157049	0.0644334	0.667334	0.677611	0.0716293	-0.203381	0.507832	0.784431	0.103593	0.420442	0.0779596	0.137708	0.462207	0.216588	0.0748418	0.583038
ENSG00000244026	FAM86DP	family with sequence similarity 86 member D, pseudogene [Source:HGNC Symbol;Acc:HGNC:32659]	692099	0.0823884	0.495297	0.436732	0.105234	0.047948	0.688581	0.400032	0.0687302	-0.0504945	0.720906	0.612093	0.0648829	-0.0240422	0.873941	0.73172	0.052913	0.543797	0.0584645	0.491016	0.522227	-0.0675165	0.781561	0.461127	0.0591071	0.210514	0.0473029	0.583038
ENSG00000079459	FDFT1	farnesyl-diphosphate farnesyltransferase 1 [Source:HGNC Symbol;Acc:HGNC:3629]	2222	0.238536	0.0430838	0.131073	0.536993	0.177912	0.129172	0.1526	0.334577	0.177923	0.211995	0.393632	0.242829	0.070774	0.644886	0.670424	0.0749162	0.409281	0.123414	0.560505	0.364512	0.188521	0.389865	0.31652	0.142326	0.216009	0.163158	0.583038
ENSG00000152944	MED21	mediator complex subunit 21 [Source:HGNC Symbol;Acc:HGNC:11473]	9412	-0.205779	0.0816993	0.180801	0.421363	-0.152494	0.193914	0.192735	0.258182	-0.18942	0.175514	0.366749	0.277977	-0.174532	0.24501	0.499531	0.216622	-0.767235	0.0029977	0.238208	0.927183	-0.227277	0.327426	0.287388	0.171373	0.206013	0.0128536	0.583038
ENSG00000011028	MRC2	mannose receptor C type 2 [Source:HGNC Symbol;Acc:HGNC:16875]	9902	0.0492649	0.681049	0.507301	0.0697117	0.0390436	0.742002	0.418504	0.0625917	-0.0745222	0.593772	0.568658	0.0835304	-0.121643	0.415903	0.583649	0.129663	0.436371	0.112562	0.549992	0.384089	0.304215	0.174189	0.206276	0.292316	0.215849	0.0656501	0.583038
ENSG00000160752	FDPS	farnesyl diphosphate synthase [Source:HGNC Symbol;Acc:HGNC:3631]	2224	0.139437	0.230079	0.302152	0.227036	0.0590343	0.608733	0.373538	0.0807575	0.0458677	0.747361	0.620603	0.0620792	-0.160182	0.29202	0.523561	0.185996	0.435388	0.0879369	0.526779	0.436685	0.222993	0.290647	0.268163	0.192514	0.215694	0.190748	0.583038
ENSG00000181163	NPM1	nucleophosmin 1 [Source:HGNC Symbol;Acc:HGNC:7910]	4869	-0.0339541	0.775851	0.538909	0.0594011	0.113131	0.336456	0.26359	0.162002	-0.134692	0.340142	0.472688	0.160684	0.0226951	0.881188	0.733874	0.0525848	-0.0799616	0.754373	0.833776	0.0616183	0.217759	0.283472	0.264472	0.19707	0.205122	0.0109193	0.583038
ENSG00000137404	NRM	nurim [Source:HGNC Symbol;Acc:HGNC:8003]	11270	0.127296	0.29167	0.340137	0.185612	0.164386	0.16776	0.178262	0.285148	0.0220876	0.876208	0.654864	0.0528082	-0.143605	0.343028	0.552111	0.159324	0.173542	0.5584	0.798673	0.0915334	0.531613	0.016547	0.0734638	0.750015	0.204558	0.0363281	0.583038
ENSG00000137076	TLN1	talin 1 [Source:HGNC Symbol;Acc:HGNC:11845]	7094	-0.00604685	0.959165	0.587969	0.0503022	0.174098	0.133739	0.156208	0.327973	-0.11174	0.41335	0.503768	0.130568	0.0619457	0.67277	0.679654	0.0708758	0.212953	0.472883	0.769504	0.113337	0.412531	0.0733071	0.134134	0.475174	0.202942	0.0272711	0.583038
ENSG00000174695	TMEM167A	transmembrane protein 167A [Source:HGNC Symbol;Acc:HGNC:28330]	153339	-0.0021909	0.984406	0.594273	0.050044	0.0899896	0.416244	0.297438	0.129271	-0.016277	0.901526	0.661305	0.0517705	-0.00959822	0.945723	0.748896	0.0505355	-0.272209	0.204465	0.642199	0.259815	0.171837	0.32496	0.286015	0.172685	0.202899	0.00219928	0.583038
ENSG00000135185	TMEM243	transmembrane protein 243 [Source:HGNC Symbol;Acc:HGNC:21707]	79161	-0.207112	0.0838319	0.183147	0.41653	0.0466434	0.69623	0.402703	0.0677639	-0.245593	0.0771076	0.269119	0.435063	-0.118699	0.429731	0.589167	0.124913	-0.143119	0.616093	0.811348	0.0802534	0.46531	0.0316423	0.0933521	0.641957	0.214393	0.11593	0.583038
ENSG00000116260	QSOX1	quiescin sulfhydryl oxidase 1 [Source:HGNC Symbol;Acc:HGNC:9756]	5768	0.0671019	0.567866	0.466617	0.0884504	0.336438	0.00303469	0.023309	0.861805	-0.0127937	0.925737	0.667204	0.0510042	0.313179	0.0302131	0.302747	0.600883	0.459808	0.123477	0.560505	0.364404	0.472103	0.0447757	0.108567	0.575945	0.214261	0.0570718	0.583038
ENSG00000134602	STK26	serine/threonine kinase 26 [Source:HGNC Symbol;Acc:HGNC:18174]	51765	0.0248314	0.831544	0.554083	0.0552336	0.240366	0.0350989	0.0758329	0.571625	-0.109273	0.417888	0.505313	0.128966	0.044976	0.756216	0.705419	0.0612139	0.157764	0.596437	0.807092	0.0838283	0.559002	0.0112909	0.0662563	0.80315	0.201235	0.0371572	0.583038
ENSG00000124571	XPO5	exportin 5 [Source:HGNC Symbol;Acc:HGNC:17675]	57510	0.151763	0.206725	0.287777	0.246429	-0.00258002	0.982768	0.486348	0.0500538	-0.0646675	0.651501	0.588861	0.0739178	0.0653147	0.670373	0.678304	0.0712061	0.46133	0.0955705	0.535134	0.418968	-0.242939	0.287587	0.266774	0.194439	0.214157	0.0952794	0.583038
ENSG00000164543	STK17A	serine/threonine kinase 17a [Source:HGNC Symbol;Acc:HGNC:11395]	9263	-0.0221415	0.848141	0.558162	0.0542384	0.166932	0.142101	0.161791	0.316463	-0.0831579	0.54286	0.549875	0.0938727	-0.045567	0.755958	0.705419	0.0612386	-0.217002	0.451916	0.762826	0.119818	0.460092	0.0370446	0.1	0.612602	0.200947	0.0211359	0.583038
ENSG00000099282	TSPAN15	tetraspanin 15 [Source:HGNC Symbol;Acc:HGNC:23298]	23555	-0.0398898	0.73985	0.527035	0.0628123	0.197517	0.0940213	0.127771	0.394912	-0.128141	0.358834	0.481059	0.152149	-0.0370476	0.805062	0.716259	0.0570684	0.145563	0.621701	0.811882	0.079281	0.620948	0.00343275	0.051431	0.918398	0.213923	0.1159	0.583038
ENSG00000140367	UBE2Q2	ubiquitin conjugating enzyme E2 Q2 [Source:HGNC Symbol;Acc:HGNC:19248]	92912	-0.0260535	0.823748	0.551752	0.0557393	0.186949	0.103676	0.135126	0.376387	-0.0495798	0.71267	0.608569	0.0658247	0.0480243	0.739272	0.700236	0.0629012	-0.372855	0.206206	0.642755	0.258122	0.418136	0.0720801	0.133404	0.478721	0.200138	0.0276936	0.583038
ENSG00000155307	SAMSN1	SAM domain, SH3 domain and nuclear localization signals 1 [Source:HGNC Symbol;Acc:HGNC:10528]	64092	-0.00725784	0.950052	0.585571	0.0504524	0.177138	0.119733	0.146757	0.34901	0.0167838	0.902749	0.66185	0.0517265	-0.0159072	0.913951	0.740604	0.0513499	-0.328452	0.253259	0.674333	0.21808	0.497596	0.0236252	0.0831843	0.69332	0.21358	0.259587	0.600847
ENSG00000163644	PPM1K	protein phosphatase, Mg2+/Mn2+ dependent 1K [Source:HGNC Symbol;Acc:HGNC:25415]	152926	-0.154312	0.199588	0.28329	0.25287	0.0217194	0.85585	0.453298	0.0538133	-0.228519	0.105166	0.301317	0.375913	-0.210201	0.165443	0.443241	0.289141	-0.0486378	0.866735	0.855531	0.0533198	0.4438	0.0445626	0.108265	0.576884	0.213546	0.0541125	0.583038
ENSG00000134001	EIF2S1	eukaryotic translation initiation factor 2 subunit alpha [Source:HGNC Symbol;Acc:HGNC:3265]	1965	0.0104735	0.929408	0.579903	0.0509052	-0.0314774	0.7878	0.432511	0.0583963	-0.0863833	0.534865	0.547022	0.095676	-0.0652093	0.662251	0.675848	0.0723486	0.0624455	0.807016	0.844018	0.0570563	-0.0805237	0.695706	0.434377	0.0682489	0.199888	0.0495183	0.583038
ENSG00000070961	ATP2B1	ATPase plasma membrane Ca2+ transporting 1 [Source:HGNC Symbol;Acc:HGNC:814]	490	-0.144689	0.221343	0.296544	0.234007	0.211401	0.0694851	0.107863	0.451493	-0.201408	0.142806	0.338395	0.317169	0.113846	0.44229	0.594244	0.120805	-0.04247	0.888987	0.858438	0.0522951	0.506162	0.0272386	0.0885162	0.668819	0.213181	0.201732	0.584142
ENSG00000203760	CENPW	centromere protein W [Source:HGNC Symbol;Acc:HGNC:21488]	387103	-0.167713	0.152823	0.246372	0.302699	-0.0477142	0.682586	0.398098	0.069509	-0.310706	0.0224458	0.173795	0.647379	-0.109986	0.458829	0.600671	0.115676	0.191462	0.505838	0.784374	0.104116	0.0664062	0.775895	0.459455	0.0596026	0.212964	0.145661	0.583038
ENSG00000153975	ZUP1	zinc finger containing ubiquitin peptidase 1 [Source:HGNC Symbol;Acc:HGNC:21224]	221302	0.19967	0.0873251	0.186608	0.408854	0.254904	0.0265176	0.0647376	0.616637	0.0122827	0.929595	0.668137	0.0509022	0.09805	0.509775	0.624591	0.101682	0.542909	0.0170212	0.370749	0.745765	0.419411	0.023268	0.0828742	0.695883	0.199581	0.0142423	0.583038
ENSG00000138101	DTNB	dystrobrevin beta [Source:HGNC Symbol;Acc:HGNC:3058]	1838	0.239254	0.0448158	0.133287	0.53018	0.105744	0.374438	0.280228	0.145146	0.248829	0.0700765	0.261001	0.453019	0.0630974	0.671879	0.67918	0.0709983	0.0141244	0.962527	0.867084	0.0502596	-0.0214673	0.929436	0.502414	0.0509226	0.212732	0.0623566	0.583038
ENSG00000105245	NUMBL	NUMB like endocytic adaptor protein [Source:HGNC Symbol;Acc:HGNC:8061]	9253	-0.0234244	0.845511	0.557268	0.0543888	0.0961283	0.418146	0.298024	0.128607	-0.102811	0.468426	0.523755	0.11284	0.033127	0.82775	0.7198	0.0554884	0.278908	0.362552	0.732832	0.154115	0.273745	0.264987	0.254721	0.209552	0.198881	0.0355629	0.583038
ENSG00000116584	ARHGEF2	Rho/Rac guanine nucleotide exchange factor 2 [Source:HGNC Symbol;Acc:HGNC:682]	9181	-0.121251	0.309498	0.349771	0.175666	0.21056	0.0726769	0.110664	0.443183	-0.175555	0.208776	0.391875	0.245641	0.042663	0.776875	0.709612	0.0593332	-0.0353311	0.90706	0.859901	0.0516046	0.524008	0.0206998	0.0789113	0.715152	0.211981	0.220223	0.589863
ENSG00000137501	SYTL2	synaptotagmin like 2 [Source:HGNC Symbol;Acc:HGNC:15585]	54843	-0.0610816	0.606661	0.482378	0.0811207	0.0470739	0.688471	0.400032	0.0687444	-0.111115	0.428362	0.508126	0.125372	-0.121156	0.42033	0.585818	0.128116	-0.134476	0.638515	0.813913	0.0764869	0.255425	0.261442	0.253026	0.212077	0.211904	0.166212	0.583038
ENSG00000214517	PPME1	protein phosphatase methylesterase 1 [Source:HGNC Symbol;Acc:HGNC:30178]	51400	-0.112228	0.347263	0.370182	0.156941	0.147505	0.210914	0.202395	0.242767	-0.181826	0.186493	0.375489	0.266587	-0.0233153	0.875225	0.731967	0.0528534	-0.0550466	0.845364	0.850378	0.0544889	0.465006	0.0290409	0.0905075	0.657465	0.211892	0.0616993	0.583038
ENSG00000137996	RTCA	RNA 3'-terminal phosphate cyclase [Source:HGNC Symbol;Acc:HGNC:17981]	8634	0.278399	0.0148579	0.074523	0.70013	0.332697	0.00301871	0.023309	0.862192	0.158181	0.241147	0.412681	0.219462	0.246444	0.0865061	0.376756	0.413268	0.462413	0.114986	0.552082	0.379552	0.407784	0.082492	0.141984	0.450251	0.198235	0.0186837	0.583038
ENSG00000110876	SELPLG	selectin P ligand [Source:HGNC Symbol;Acc:HGNC:10722]	6404	0.202804	0.0817408	0.180801	0.421268	0.333721	0.00327111	0.0241644	0.856214	0.167048	0.220831	0.398965	0.235361	0.136096	0.353165	0.556291	0.154669	0.107402	0.723778	0.82809	0.0648611	0.582756	0.00909121	0.0617972	0.829666	0.211506	0.14378	0.583038
ENSG00000124783	SSR1	signal sequence receptor subunit 1 [Source:HGNC Symbol;Acc:HGNC:11323]	6745	0.104263	0.37914	0.385864	0.14323	0.232017	0.0459184	0.0872787	0.525955	0.0302747	0.830121	0.642078	0.0553355	0.127585	0.397658	0.577181	0.136321	0.255424	0.393958	0.743194	0.140669	0.484976	0.0344272	0.0971317	0.626382	0.197988	0.0179027	0.583038
ENSG00000214078	CPNE1	copine 1 [Source:HGNC Symbol;Acc:HGNC:2314]	8904	-0.0819466	0.498775	0.438023	0.104327	0.112171	0.348766	0.268998	0.156254	-0.293836	0.0372667	0.208679	0.566073	-0.0537184	0.726599	0.697142	0.0642514	0.416534	0.150521	0.587937	0.322618	0.301754	0.199171	0.220981	0.265071	0.211033	0.0965802	0.583038
ENSG00000221926	TRIM16	tripartite motif containing 16 [Source:HGNC Symbol;Acc:HGNC:17241]	10626	-0.0318497	0.780256	0.540038	0.0590235	0.123783	0.271569	0.233176	0.197821	-0.0723192	0.586253	0.566184	0.0849406	0.0581779	0.683019	0.6823	0.0694988	0.0551407	0.773481	0.836354	0.0598181	0.195571	0.195354	0.218686	0.268965	0.210587	0.153923	0.583038
ENSG00000198818	SFT2D1	SFT2 domain containing 1 [Source:HGNC Symbol;Acc:HGNC:21102]	113402	0.0334126	0.775851	0.538909	0.0594011	0.194095	0.0920138	0.126184	0.398991	-0.00783825	0.955144	0.674271	0.0503655	0.0459485	0.758254	0.705554	0.0610199	0.00982259	0.973612	0.868597	0.0501287	0.570703	0.0087563	0.061408	0.833996	0.197553	0.0127092	0.583038
ENSG00000089820	ARHGAP4	Rho GTPase activating protein 4 [Source:HGNC Symbol;Acc:HGNC:674]	393	0.207691	0.0801371	0.178913	0.424978	0.0902242	0.445454	0.309807	0.119572	0.0455069	0.742837	0.619725	0.0625352	-0.105759	0.47611	0.607836	0.110638	0.697585	0.0130255	0.353779	0.784233	0.33374	0.164659	0.200458	0.303924	0.210421	0.104605	0.583038
ENSG00000149257	SERPINH1	serpin family H member 1 [Source:HGNC Symbol;Acc:HGNC:1546]	871	-0.0573374	0.631508	0.489482	0.0769459	0.0919295	0.436534	0.306123	0.122424	-0.16413	0.230532	0.40495	0.227559	-0.116348	0.429169	0.589133	0.125101	0.339143	0.226205	0.657368	0.23984	0.505261	0.0178966	0.0755903	0.738116	0.210284	0.0743892	0.583038
ENSG00000067596	DHX8	DEAH-box helicase 8 [Source:HGNC Symbol;Acc:HGNC:2749]	1659	0.167883	0.159475	0.252233	0.294665	0.241117	0.0398582	0.0807991	0.550303	0.111712	0.416869	0.504911	0.129323	0.310638	0.0325149	0.305111	0.588881	0.213454	0.434548	0.75955	0.125588	0.0311592	0.888455	0.491278	0.0523173	0.210217	0.127864	0.583038
ENSG00000160211	G6PD	glucose-6-phosphate dehydrogenase [Source:HGNC Symbol;Acc:HGNC:4057]	2539	0.038404	0.740856	0.527504	0.0627089	0.191174	0.0935866	0.127374	0.395788	0.0141434	0.917256	0.664518	0.0512477	0.19671	0.174557	0.448461	0.279007	0.0670264	0.767986	0.836354	0.0603186	0.112066	0.539094	0.377894	0.0958762	0.210059	0.157381	0.583038
ENSG00000110324	IL10RA	interleukin 10 receptor subunit alpha [Source:HGNC Symbol;Acc:HGNC:5964]	3587	0.0485436	0.678817	0.50654	0.0700083	0.238866	0.0371782	0.077768	0.562041	0.0545906	0.693537	0.601789	0.0681436	0.082894	0.576392	0.646598	0.0868492	-0.12808	0.66116	0.819772	0.0729993	0.451395	0.043025	0.106559	0.583773	0.2099	0.148165	0.583038
ENSG00000071282	LMCD1	LIM and cysteine rich domains 1 [Source:HGNC Symbol;Acc:HGNC:6633]	29995	-0.0606738	0.613336	0.484924	0.0799609	0.156717	0.18522	0.187905	0.266671	-0.10485	0.458361	0.519795	0.115817	0.0381364	0.801657	0.715047	0.0573239	-0.00122531	0.996799	0.870139	0.0500019	0.440385	0.0602025	0.12381	0.5162	0.209831	0.203818	0.584247
ENSG00000156795	NTAQ1	N-terminal glutamine amidase 1 [Source:HGNC Symbol;Acc:HGNC:25490]	55093	0.160738	0.158124	0.250908	0.296267	0.00279552	0.980316	0.485925	0.0500702	0.098762	0.460201	0.52014	0.115265	-0.00975215	0.945862	0.748896	0.0505328	0.17917	0.54258	0.795907	0.0950693	-0.0769325	0.746711	0.451341	0.062388	0.209763	0.221745	0.589863
ENSG00000033178	UBA6	ubiquitin like modifier activating enzyme 6 [Source:HGNC Symbol;Acc:HGNC:25581]	55236	0.0480937	0.687197	0.509714	0.0689084	0.249829	0.0323	0.0722703	0.585262	0.0535594	0.701443	0.604437	0.0671629	0.388666	0.00769526	0.239275	0.785216	-0.471144	0.0652235	0.501684	0.499613	-0.0034053	0.987433	0.516835	0.0500292	0.209383	0.115381	0.583038
ENSG00000135723	FHOD1	formin homology 2 domain containing 1 [Source:HGNC Symbol;Acc:HGNC:17905]	29109	0.211475	0.0670549	0.16313	0.458053	0.252421	0.0264744	0.0646937	0.61689	0.138143	0.329145	0.465692	0.16602	0.176539	0.243846	0.499486	0.217472	0.372387	0.137708	0.578136	0.341312	0.357216	0.0733604	0.134171	0.475021	0.209109	0.0768387	0.583038
ENSG00000090006	LTBP4	latent transforming growth factor beta binding protein 4 [Source:HGNC Symbol;Acc:HGNC:6717]	8425	-0.159008	0.18349	0.271945	0.268413	0.0404388	0.733619	0.416381	0.0634632	-0.191024	0.172827	0.364672	0.280885	-0.00275195	0.985483	0.756304	0.0500382	-0.0720624	0.811993	0.844962	0.0566882	0.201213	0.405948	0.323452	0.135963	0.20909	0.26386	0.602196
ENSG00000187239	FNBP1	formin binding protein 1 [Source:HGNC Symbol;Acc:HGNC:17069]	23048	-0.0282294	0.812534	0.548827	0.0565104	0.25565	0.0277853	0.0663819	0.609339	-0.0858251	0.544553	0.550566	0.0934973	0.0775553	0.609554	0.657139	0.0806939	-0.0608248	0.838224	0.848558	0.0549206	0.497229	0.0267219	0.0878306	0.672175	0.208865	0.12181	0.583038
ENSG00000181104	F2R	coagulation factor II thrombin receptor [Source:HGNC Symbol;Acc:HGNC:3537]	2149	0.151233	0.184066	0.272321	0.267831	0.258108	0.0206282	0.0567539	0.65446	0.164966	0.230931	0.40495	0.227247	0.257917	0.0786309	0.363951	0.431369	-0.257731	0.286007	0.687984	0.195443	0.184722	0.344695	0.295981	0.162568	0.208785	0.0835823	0.583038
ENSG00000164284	GRPEL2	GrpE like 2, mitochondrial [Source:HGNC Symbol;Acc:HGNC:21060]	134266	0.0102127	0.932211	0.580533	0.0508345	0.340608	0.00330643	0.0242596	0.855399	-0.0908365	0.51566	0.539876	0.100224	0.224474	0.131161	0.416128	0.333473	0.211519	0.434047	0.75955	0.12576	0.454552	0.0268841	0.0880654	0.671117	0.20861	0.139384	0.583038
ENSG00000140682	TGFB1I1	transforming growth factor beta 1 induced transcript 1 [Source:HGNC Symbol;Acc:HGNC:11767]	7041	-0.254931	0.0314988	0.109356	0.589335	0.0217696	0.854601	0.45302	0.0538806	-0.269758	0.048109	0.228838	0.521705	-0.107713	0.467241	0.604377	0.113185	-0.286396	0.311972	0.703186	0.179834	0.312782	0.165488	0.200868	0.302884	0.208422	0.215484	0.588901
ENSG00000155304	HSPA13	heat shock protein family A (Hsp70) member 13 [Source:HGNC Symbol;Acc:HGNC:11375]	6782	-0.198889	0.0946639	0.194351	0.393624	0.156897	0.183922	0.187213	0.267977	-0.204823	0.141313	0.336215	0.31918	0.0467449	0.755971	0.705419	0.0612373	-0.334852	0.251353	0.674333	0.219514	0.460063	0.0420875	0.105134	0.588071	0.208404	0.166244	0.583038
ENSG00000171345	KRT19	keratin 19 [Source:HGNC Symbol;Acc:HGNC:6436]	3880	-0.188917	0.103939	0.20418	0.375906	0.111873	0.332735	0.26202	0.163798	-0.270357	0.0390848	0.214045	0.557956	0.0212286	0.881746	0.733874	0.0525603	0.132732	0.60218	0.807606	0.0827565	0.40631	0.0360436	0.0990003	0.61778	0.208246	0.267348	0.602964
ENSG00000234608	MAPKAPK5-AS1	MAPKAPK5 antisense RNA 1 [Source:HGNC Symbol;Acc:HGNC:24091]	51275	-0.0337666	0.780798	0.54015	0.0589776	-0.134093	0.262409	0.229454	0.203774	-0.200325	0.157366	0.351565	0.298642	-0.288226	0.0561046	0.340594	0.494054	0.370339	0.205666	0.642755	0.258645	-0.014122	0.953353	0.508164	0.0504024	0.208126	0.0695684	0.583038
ENSG00000150687	PRSS23	serine protease 23 [Source:HGNC Symbol;Acc:HGNC:14370]	11098	0.0551234	0.635736	0.490848	0.0762734	0.288135	0.0108655	0.0428806	0.739652	0.0321086	0.816852	0.638514	0.0562208	0.245132	0.0955119	0.386615	0.394369	0.033408	0.911195	0.859901	0.0514642	0.566008	0.0102496	0.0636864	0.815311	0.208081	0.0642585	0.583038
ENSG00000138964	PARVG	parvin gamma [Source:HGNC Symbol;Acc:HGNC:14654]	64098	0.179246	0.135733	0.233722	0.325163	0.247966	0.0358287	0.076354	0.568211	0.0491132	0.72559	0.613381	0.0643622	0.0661401	0.659085	0.674765	0.072804	0.333502	0.26903	0.68187	0.206725	0.397468	0.094944	0.152553	0.420369	0.20784	0.0637185	0.583038
ENSG00000113070	HBEGF	heparin binding EGF like growth factor [Source:HGNC Symbol;Acc:HGNC:3059]	1839	-0.167687	0.152721	0.246264	0.302826	0.115689	0.320114	0.256424	0.170099	-0.175949	0.203319	0.387753	0.250525	-0.106451	0.474521	0.607323	0.111089	-0.288675	0.313032	0.704075	0.179234	0.45157	0.040798	0.104369	0.594111	0.20716	0.179181	0.583038
ENSG00000092096	SLC22A17	solute carrier family 22 member 17 [Source:HGNC Symbol;Acc:HGNC:23095]	51310	-0.188064	0.112498	0.212307	0.360868	-0.00337418	0.977202	0.484927	0.0500941	-0.258741	0.0635769	0.252701	0.471118	-0.0420657	0.781132	0.710585	0.0589692	-0.262902	0.347746	0.727448	0.161079	-0.01067	0.96278	0.510936	0.0502561	0.207099	0.12217	0.583038
ENSG00000183793	NPIPA5	nuclear pore complex interacting protein family member A5 [Source:HGNC Symbol;Acc:HGNC:41980]	100288332	-0.0338652	0.779354	0.53992	0.0591001	0.0495858	0.678331	0.396472	0.0700733	-0.0437803	0.757128	0.62418	0.0611269	0.0238795	0.874969	0.731967	0.0528653	-0.0687881	0.819049	0.8459	0.0561844	-0.0358853	0.882403	0.489713	0.0525781	0.207011	0.526365	0.684081
ENSG00000111203	ITFG2	integrin alpha FG-GAP repeat containing 2 [Source:HGNC Symbol;Acc:HGNC:30879]	55846	-0.233457	0.0511956	0.143523	0.506831	-0.0638776	0.593386	0.368059	0.0835132	-0.362283	0.00793274	0.130344	0.781949	-0.23313	0.117179	0.403278	0.355131	0.312894	0.206745	0.643746	0.257601	0.248976	0.213128	0.228639	0.251558	0.206575	0.123008	0.583038
ENSG00000167766	ZNF83	zinc finger protein 83 [Source:HGNC Symbol;Acc:HGNC:13158]	55769	-0.18514	0.11975	0.220155	0.348983	0.0883987	0.45511	0.31392	0.116589	-0.232954	0.0969355	0.294944	0.391538	-0.00156751	0.991772	0.756841	0.0500123	-0.184924	0.534709	0.792333	0.0969062	0.327831	0.162913	0.199283	0.306134	0.206508	0.0900746	0.583038
ENSG00000151376	ME3	malic enzyme 3 [Source:HGNC Symbol;Acc:HGNC:6985]	10873	-0.116659	0.32664	0.359099	0.166799	-0.0779676	0.508191	0.335485	0.101925	-0.237278	0.0870005	0.283134	0.412184	-0.152705	0.307549	0.533811	0.177248	0.0542763	0.851982	0.852022	0.0541072	0.0199244	0.932339	0.502771	0.0508481	0.206221	0.225665	0.590134
ENSG00000111906	HDDC2	HD domain containing 2 [Source:HGNC Symbol;Acc:HGNC:21078]	51020	-0.0663545	0.576694	0.470628	0.0866906	-0.0686393	0.559417	0.354449	0.0901877	-0.132097	0.343303	0.474427	0.159195	-0.200681	0.177641	0.449889	0.27571	0.116038	0.673723	0.821802	0.0711945	0.145667	0.510655	0.367538	0.102859	0.206114	0.0691301	0.583038
ENSG00000139636	LMBR1L	limb development membrane protein 1 like [Source:HGNC Symbol;Acc:HGNC:18268]	55716	0.071167	0.551783	0.460082	0.0918036	0.231466	0.0481558	0.0894072	0.517634	-0.0266069	0.851908	0.647804	0.0540363	0.0735877	0.62971	0.664243	0.0773042	0.412953	0.144728	0.58491	0.330846	0.478326	0.029909	0.09125	0.652179	0.197276	0.0363169	0.583038
ENSG00000230989	HSBP1	heat shock factor binding protein 1 [Source:HGNC Symbol;Acc:HGNC:5203]	3281	0.147882	0.205976	0.287392	0.247094	0.0966729	0.404542	0.292693	0.133463	0.00665382	0.962503	0.675966	0.0502553	0.0247539	0.87035	0.731187	0.0530832	0.494116	0.0557287	0.483838	0.532037	0.0154828	0.943713	0.505711	0.0505864	0.205969	0.101582	0.583038
ENSG00000117632	STMN1	stathmin 1 [Source:HGNC Symbol;Acc:HGNC:6510]	3925	-0.244939	0.0412028	0.127349	0.544652	-0.0666645	0.578525	0.362208	0.0863325	-0.328996	0.0181853	0.163385	0.678202	-0.245336	0.104111	0.391367	0.377849	-0.0316051	0.91097	0.859901	0.0514717	0.265281	0.235152	0.240418	0.232296	0.205676	0.1074	0.583038
ENSG00000144036	EXOC6B	exocyst complex component 6B [Source:HGNC Symbol;Acc:HGNC:17085]	23233	-0.00200781	0.985868	0.594511	0.0500362	0.239921	0.0301708	0.0695498	0.596269	-0.1136	0.393982	0.496636	0.13772	0.105487	0.460474	0.601381	0.115183	0.239096	0.403589	0.748046	0.136872	0.454411	0.0384773	0.102068	0.605376	0.196914	0.00965499	0.583038
ENSG00000214226	C17orf67	chromosome 17 open reading frame 67 [Source:HGNC Symbol;Acc:HGNC:27900]	339210	-0.216387	0.0689132	0.165451	0.453018	0.0516853	0.663336	0.392184	0.0721397	-0.190032	0.17849	0.369702	0.274813	-0.0445534	0.76998	0.708084	0.0599398	-0.460129	0.0859139	0.523752	0.441629	0.047634	0.832428	0.476676	0.0552865	0.205064	0.12214	0.583038
ENSG00000269556	TMEM185A	transmembrane protein 185A [Source:HGNC Symbol;Acc:HGNC:17125]	84548	0.0630599	0.598517	0.47889	0.0825746	0.0115488	0.922413	0.471993	0.0510942	0.0131179	0.92623	0.667328	0.0509908	-0.0558987	0.712633	0.694207	0.065829	0.0286267	0.924328	0.861372	0.0510616	0.0525399	0.828765	0.475997	0.0555249	0.205	0.123007	0.583038
ENSG00000158747	NBL1	NBL1, DAN family BMP antagonist [Source:HGNC Symbol;Acc:HGNC:7650]	4681	-0.245999	0.0361403	0.118344	0.566771	-0.0845409	0.47155	0.321198	0.111744	-0.243854	0.0749615	0.267311	0.440381	-0.141767	0.338204	0.548947	0.161607	-0.326435	0.277946	0.686603	0.200685	0.102191	0.678011	0.428162	0.0705989	0.204953	0.0664434	0.583038
ENSG00000074370	ATP2A3	ATPase sarcoplasmic/endoplasmic reticulum Ca2+ transporting 3 [Source:HGNC Symbol;Acc:HGNC:813]	489	0.0574395	0.62274	0.48645	0.0783752	0.341033	0.00246868	0.0213534	0.876276	-0.0222018	0.873105	0.653821	0.0529522	0.252903	0.0860538	0.376003	0.414266	0.187598	0.531495	0.791247	0.0976718	0.488383	0.0321742	0.0941147	0.638904	0.204839	0.0803559	0.583038
ENSG00000149428	HYOU1	hypoxia up-regulated 1 [Source:HGNC Symbol;Acc:HGNC:16931]	10525	-0.105529	0.381452	0.387164	0.142302	0.142017	0.232971	0.213359	0.224798	-0.174618	0.212563	0.393874	0.242339	0.028142	0.852152	0.724933	0.0540228	0.139904	0.635079	0.813913	0.0770432	0.422061	0.0631722	0.126277	0.506248	0.204813	0.296932	0.609813
ENSG00000107099	DOCK8	dedicator of cytokinesis 8 [Source:HGNC Symbol;Acc:HGNC:19191]	81704	0.0591622	0.620403	0.486175	0.0787641	0.244479	0.0363552	0.0769122	0.565783	0.00943887	0.946877	0.672461	0.050513	0.0381852	0.801373	0.715047	0.0573455	0.0865012	0.777062	0.837189	0.0594993	0.579785	0.00994131	0.0632685	0.819042	0.204717	0.101054	0.583038
ENSG00000147679	UTP23	UTP23 small subunit processome component [Source:HGNC Symbol;Acc:HGNC:28224]	84294	-0.132744	0.25953	0.321897	0.205698	0.0277064	0.812616	0.440199	0.0565046	-0.188167	0.17277	0.364672	0.280948	-0.0173942	0.907041	0.740441	0.0515766	-0.382267	0.0950886	0.534676	0.420045	-0.0220702	0.908524	0.49739	0.0515541	0.196101	0.0174215	0.583038
ENSG00000197122	SRC	SRC proto-oncogene, non-receptor tyrosine kinase [Source:HGNC Symbol;Acc:HGNC:11283]	6714	-0.0693044	0.560443	0.463659	0.0899739	0.255383	0.0280958	0.0668824	0.60759	-0.138583	0.323269	0.462046	0.168974	0.13459	0.371048	0.565053	0.146907	0.0672516	0.827482	0.847098	0.0556098	0.539267	0.0194311	0.0774988	0.725273	0.204362	0.22565	0.590134
ENSG00000100968	NFATC4	nuclear factor of activated T cells 4 [Source:HGNC Symbol;Acc:HGNC:7778]	4776	-0.211457	0.077699	0.176353	0.430752	0.0526096	0.659926	0.391365	0.072627	-0.264206	0.0562198	0.240874	0.493681	-0.0688512	0.646777	0.671544	0.0746283	-0.0801017	0.787874	0.839693	0.0585719	0.206431	0.385241	0.314562	0.144232	0.204155	0.34726	0.629339
ENSG00000175567	UCP2	uncoupling protein 2 [Source:HGNC Symbol;Acc:HGNC:12518]	7351	0.312263	0.00858366	0.0567973	0.766834	0.178031	0.134953	0.157047	0.326258	0.296696	0.0333657	0.200751	0.584612	0.129133	0.394387	0.57521	0.137565	0.0933675	0.744612	0.83303	0.0626038	0.0663373	0.774189	0.459022	0.0597546	0.204097	0.162767	0.583038
ENSG00000186951	PPARA	peroxisome proliferator activated receptor alpha [Source:HGNC Symbol;Acc:HGNC:9232]	5465	0.0404913	0.733244	0.524614	0.0635029	-0.0902552	0.441961	0.308309	0.120678	-0.0111281	0.933664	0.669386	0.0508007	-0.211934	0.135774	0.419143	0.326842	0.0595507	0.835245	0.847938	0.055107	0.143646	0.531842	0.375302	0.0975886	0.204058	0.0821137	0.583038
ENSG00000121716	PILRB	paired immunoglobin like type 2 receptor beta [Source:HGNC Symbol;Acc:HGNC:18297]	29990	0.109269	0.366439	0.379486	0.148487	0.150966	0.206219	0.199812	0.246878	-0.0613689	0.668034	0.594034	0.0715314	0.0927141	0.545206	0.636954	0.0933532	0.387148	0.169813	0.611152	0.297554	0.048759	0.834559	0.476941	0.0551504	0.203801	0.0837181	0.583038
ENSG00000143156	NME7	NME/NM23 family member 7 [Source:HGNC Symbol;Acc:HGNC:20461]	29922	-0.128312	0.285349	0.336679	0.189331	0.0872183	0.46369	0.31764	0.114024	-0.166281	0.23695	0.409359	0.222611	-0.0300473	0.842751	0.723	0.0545592	-0.0332311	0.909601	0.859901	0.0515176	0.411936	0.0673445	0.129638	0.492946	0.196023	0.0406183	0.583038
ENSG00000168615	ADAM9	ADAM metallopeptidase domain 9 [Source:HGNC Symbol;Acc:HGNC:216]	8754	0.139278	0.220626	0.296017	0.234595	0.244701	0.0281233	0.0668856	0.607436	0.141786	0.288377	0.442611	0.188137	0.211145	0.138538	0.422236	0.322978	-0.392387	0.17879	0.616368	0.286968	0.298778	0.205589	0.224086	0.258719	0.195944	0.0108618	0.583038
ENSG00000164104	HMGB2	high mobility group box 2 [Source:HGNC Symbol;Acc:HGNC:5000]	3148	-0.22508	0.0566423	0.150473	0.488766	-0.0569471	0.62924	0.380988	0.077311	-0.295918	0.0327715	0.199578	0.587585	-0.26594	0.0749358	0.360303	0.440445	-0.185499	0.514182	0.786448	0.101953	0.265138	0.241243	0.243071	0.227363	0.202732	0.315868	0.618163
ENSG00000124766	SOX4	SRY-box transcription factor 4 [Source:HGNC Symbol;Acc:HGNC:11200]	6659	-0.0439172	0.710091	0.517243	0.0660888	0.336539	0.0031858	0.0239209	0.858204	-0.0808986	0.554696	0.555722	0.0912963	0.256988	0.0767861	0.361119	0.435851	-0.0454996	0.88021	0.857139	0.0526761	0.608004	0.00548845	0.0553648	0.881577	0.202553	0.0746608	0.583038
ENSG00000173482	PTPRM	protein tyrosine phosphatase receptor type M [Source:HGNC Symbol;Acc:HGNC:9675]	5797	0.075236	0.530429	0.451368	0.0965651	0.141991	0.23003	0.211809	0.227075	0.025995	0.852475	0.647982	0.054005	0.0445436	0.766166	0.70723	0.0602843	0.100927	0.668064	0.821478	0.0719962	0.151309	0.422311	0.330801	0.129888	0.202298	0.127781	0.583038
ENSG00000166165	CKB	creatine kinase B [Source:HGNC Symbol;Acc:HGNC:1991]	1152	-0.261459	0.0289315	0.104734	0.602956	0.0751612	0.530698	0.344607	0.0965029	-0.332119	0.0177072	0.162616	0.681974	-0.0944369	0.537323	0.633923	0.0951159	-0.0431607	0.87762	0.856359	0.0527943	0.428333	0.0450165	0.108781	0.574888	0.201567	0.419547	0.652673
ENSG00000116604	MEF2D	myocyte enhancer factor 2D [Source:HGNC Symbol;Acc:HGNC:6997]	4209	-0.0859781	0.472157	0.427474	0.11157	0.238458	0.0417277	0.0827062	0.542487	-0.136072	0.330983	0.466487	0.165112	0.151457	0.312524	0.536608	0.174569	-0.0578159	0.844473	0.85029	0.0545416	0.386015	0.0909856	0.149023	0.429437	0.201402	0.0569104	0.583038
ENSG00000117906	RCN2	reticulocalbin 2 [Source:HGNC Symbol;Acc:HGNC:9935]	5955	0.0222155	0.850191	0.558937	0.054123	0.0446398	0.701177	0.404381	0.0671548	-0.0518919	0.703359	0.605131	0.06693	-0.106436	0.465477	0.603455	0.113701	0.123589	0.682226	0.823181	0.0700236	0.312212	0.189807	0.215197	0.274788	0.195061	0.0343593	0.583038
ENSG00000137343	ATAT1	alpha tubulin acetyltransferase 1 [Source:HGNC Symbol;Acc:HGNC:21186]	79969	-0.0124585	0.914689	0.57626	0.051324	0.141944	0.21535	0.204969	0.238981	-0.100037	0.476403	0.526127	0.110556	-0.0208004	0.890319	0.73611	0.0521997	0.185336	0.485885	0.774445	0.109565	0.259833	0.218977	0.23205	0.24621	0.194273	0.00920317	0.583038
ENSG00000106605	BLVRA	biliverdin reductase A [Source:HGNC Symbol;Acc:HGNC:1062]	644	0.0576081	0.633278	0.489832	0.076663	0.282822	0.0161785	0.0510023	0.688693	-0.0605181	0.669546	0.594361	0.0713207	0.0761665	0.61615	0.659617	0.0795567	0.292224	0.328458	0.712882	0.170828	0.666382	0.00185956	0.0489002	0.952386	0.200891	0.107738	0.583038
ENSG00000128915	ICE2	interactor of little elongation complex ELL subunit 2 [Source:HGNC Symbol;Acc:HGNC:29885]	79664	-0.0774354	0.518872	0.446602	0.0992976	-0.14091	0.2341	0.213921	0.223933	-0.224461	0.112178	0.308532	0.363515	-0.206498	0.173803	0.448215	0.279823	0.306094	0.253372	0.674333	0.217995	-0.0993718	0.650791	0.419011	0.074558	0.193821	0.0246486	0.583038
ENSG00000167617	CDC42EP5	CDC42 effector protein 5 [Source:HGNC Symbol;Acc:HGNC:17408]	148170	-0.109446	0.361985	0.377275	0.150393	0.111797	0.346526	0.267989	0.157279	-0.162661	0.249867	0.418528	0.213129	-0.00581757	0.969523	0.754203	0.0501686	0.0539839	0.858119	0.853608	0.053769	0.403487	0.0840829	0.143382	0.446201	0.200044	0.331021	0.624376
ENSG00000146374	RSPO3	R-spondin 3 [Source:HGNC Symbol;Acc:HGNC:20866]	84870	0.217058	0.0593903	0.153508	0.480211	0.302596	0.0072787	0.0352411	0.784551	0.18135	0.193169	0.380311	0.260025	0.300025	0.0426363	0.31813	0.542944	0.402541	0.135113	0.574793	0.345328	0.223649	0.311522	0.279369	0.180088	0.199894	0.0956558	0.583038
ENSG00000168781	PPIP5K1	diphosphoinositol pentakisphosphate kinase 1 [Source:HGNC Symbol;Acc:HGNC:29023]	9677	0.0295867	0.802523	0.545916	0.0572427	0.12995	0.265305	0.230692	0.201864	-0.104823	0.452091	0.51706	0.117728	-0.0545228	0.715604	0.695113	0.0654853	0.299925	0.314387	0.704075	0.178473	0.451056	0.051047	0.114795	0.549827	0.192637	0.0358465	0.583038
ENSG00000145506	NKD2	NKD inhibitor of WNT signaling pathway 2 [Source:HGNC Symbol;Acc:HGNC:17046]	85409	-0.0537096	0.652151	0.496062	0.0737621	0.0845582	0.472783	0.321538	0.111392	-0.158953	0.256538	0.422447	0.208464	-0.0263093	0.861558	0.728079	0.053521	0.0447459	0.873874	0.85631	0.0529698	0.257914	0.247687	0.246624	0.222313	0.199817	0.0864438	0.583038
ENSG00000017260	ATP2C1	ATPase secretory pathway Ca2+ transporting 1 [Source:HGNC Symbol;Acc:HGNC:13211]	27032	0.0808863	0.494269	0.436427	0.105505	0.115396	0.323607	0.257568	0.168322	0.0199568	0.887105	0.657308	0.0523316	-0.0548665	0.715599	0.695113	0.0654859	0.0153621	0.952937	0.864961	0.0504097	0.22103	0.28449	0.264865	0.196414	0.191879	0.0236528	0.583038
ENSG00000106333	PCOLCE	procollagen C-endopeptidase enhancer [Source:HGNC Symbol;Acc:HGNC:8738]	5118	-0.116605	0.322069	0.357032	0.169101	-0.159182	0.170752	0.180118	0.281835	-0.140106	0.294787	0.445758	0.184392	-0.320376	0.0232063	0.287504	0.642337	0.0639121	0.820498	0.846146	0.0560835	-0.0583524	0.797223	0.466178	0.0578118	0.199451	0.27108	0.602964
ENSG00000085514	PILRA	paired immunoglobin like type 2 receptor alpha [Source:HGNC Symbol;Acc:HGNC:20396]	29992	0.0444455	0.704872	0.515536	0.0667082	0.198489	0.0848237	0.120793	0.414321	0.0485851	0.722574	0.61266	0.0646963	0.119664	0.413591	0.583534	0.130482	-0.192686	0.526635	0.789458	0.0988462	0.338787	0.157964	0.195987	0.312544	0.199403	0.347375	0.629393
ENSG00000213689	TREX1	three prime repair exonuclease 1 [Source:HGNC Symbol;Acc:HGNC:12269]	11277	0.0176508	0.883481	0.567612	0.0524799	-0.115531	0.330986	0.261176	0.164651	-0.06958	0.624066	0.579415	0.0782278	-0.275629	0.06678	0.351173	0.462003	0.309242	0.291874	0.69116	0.191751	0.152953	0.522154	0.372019	0.0999482	0.199394	0.138209	0.583038
ENSG00000176788	BASP1	brain abundant membrane attached signal protein 1 [Source:HGNC Symbol;Acc:HGNC:957]	10409	-0.0301585	0.799291	0.545035	0.0574881	0.234064	0.0436687	0.0846668	0.534667	-0.0349423	0.800423	0.634725	0.0574178	0.106956	0.469498	0.60502	0.112529	-0.212801	0.487971	0.77507	0.108976	0.471249	0.0453917	0.10917	0.57325	0.199315	0.343561	0.627579
ENSG00000159166	LAD1	ladinin 1 [Source:HGNC Symbol;Acc:HGNC:6472]	3898	0.0952172	0.423427	0.406204	0.126788	0.245081	0.0352993	0.075982	0.570682	-0.0764485	0.587932	0.566731	0.0846223	0.0576324	0.703258	0.690173	0.0669422	0.541919	0.059818	0.495654	0.51752	0.513444	0.0238695	0.0834081	0.691584	0.199003	0.100928	0.583038
ENSG00000138166	DUSP5	dual specificity phosphatase 5 [Source:HGNC Symbol;Acc:HGNC:3071]	1847	-0.171349	0.147646	0.242699	0.309214	0.114191	0.330982	0.261176	0.164653	-0.246928	0.0764911	0.268729	0.436576	-0.0875316	0.562111	0.643227	0.0897371	-0.0791773	0.779867	0.837383	0.0592538	0.489775	0.0210664	0.0795657	0.712305	0.198881	0.198042	0.584142
ENSG00000130150	MOSPD2	motile sperm domain containing 2 [Source:HGNC Symbol;Acc:HGNC:28381]	158747	0.116495	0.317234	0.354296	0.171584	0.29164	0.0101414	0.0413795	0.747833	0.0723197	0.604749	0.572304	0.0815402	0.152045	0.308518	0.533978	0.176722	0.0636484	0.829272	0.847433	0.0554916	0.480335	0.0314064	0.0930312	0.643324	0.190987	0.0263104	0.583038
ENSG00000196937	FAM3C	FAM3 metabolism regulating signaling molecule C [Source:HGNC Symbol;Acc:HGNC:18664]	10447	-0.113291	0.339463	0.366381	0.160571	0.150645	0.19825	0.195338	0.254107	-0.201766	0.141034	0.335977	0.319559	0.022133	0.881208	0.733874	0.0525839	0.0781178	0.791642	0.840663	0.0582609	0.43621	0.0541792	0.118013	0.537779	0.190732	0.0210296	0.583038
ENSG00000063180	CA11	carbonic anhydrase 11 [Source:HGNC Symbol;Acc:HGNC:1370]	770	0.0510045	0.665219	0.501177	0.0718734	0.153401	0.186415	0.188424	0.265478	-0.0550432	0.681374	0.597087	0.069716	0.0153226	0.915118	0.740812	0.0513133	0.0607857	0.836822	0.84845	0.0550079	0.225287	0.337821	0.292499	0.165995	0.198624	0.490668	0.67219
ENSG00000164162	ANAPC10	anaphase promoting complex subunit 10 [Source:HGNC Symbol;Acc:HGNC:24077]	10393	-0.105639	0.380109	0.386303	0.14284	-0.0305222	0.798096	0.435722	0.0575799	-0.171644	0.221744	0.399536	0.23461	-0.215667	0.151097	0.431757	0.306387	-0.344248	0.233359	0.662055	0.233779	0.0572372	0.809565	0.470345	0.0568665	0.190006	0.0489503	0.583038
ENSG00000150938	CRIM1	cysteine rich transmembrane BMP regulator 1 [Source:HGNC Symbol;Acc:HGNC:2359]	51232	-0.0430366	0.719048	0.520118	0.0650575	0.20121	0.0866255	0.121973	0.410368	-0.0284794	0.837719	0.644172	0.0548608	0.103071	0.488432	0.61287	0.107234	-0.259218	0.358043	0.732459	0.156191	0.379536	0.0856079	0.144705	0.442387	0.198192	0.168094	0.583038
ENSG00000167642	SPINT2	serine peptidase inhibitor, Kunitz type 2 [Source:HGNC Symbol;Acc:HGNC:11247]	10653	-0.0421154	0.721966	0.521308	0.06473	0.172932	0.137405	0.158619	0.322839	-0.089283	0.520772	0.542404	0.098983	0.0354766	0.812064	0.7175	0.056558	0.0244009	0.930874	0.862457	0.0508853	0.371436	0.0880021	0.147202	0.436527	0.198064	0.219704	0.589863
ENSG00000189091	SF3B3	splicing factor 3b subunit 3 [Source:HGNC Symbol;Acc:HGNC:10770]	23450	0.0473652	0.689149	0.510245	0.0686574	0.0862617	0.461036	0.316798	0.114809	-0.077692	0.580476	0.563991	0.0860504	-0.0423103	0.779013	0.710045	0.0591494	0.353845	0.118598	0.553527	0.372972	0.153287	0.413531	0.327527	0.1331	0.188902	0.0432273	0.583038
ENSG00000182636	NDN	necdin, MAGE family member [Source:HGNC Symbol;Acc:HGNC:7675]	4692	-0.176477	0.138684	0.235735	0.32108	0.00344329	0.976847	0.484912	0.0500971	-0.239204	0.0825147	0.277486	0.422242	-0.13967	0.348078	0.554727	0.156981	0.00745982	0.980114	0.868963	0.0500731	0.278095	0.23993	0.242317	0.228413	0.197599	0.0811578	0.583038
ENSG00000173226	IQCB1	IQ motif containing B1 [Source:HGNC Symbol;Acc:HGNC:28949]	9657	-0.0874922	0.463114	0.423595	0.114194	0.20538	0.079534	0.116799	0.426391	-0.185176	0.184153	0.374774	0.268952	0.133984	0.371677	0.565315	0.146644	-0.0399054	0.894112	0.859064	0.0520865	0.388303	0.0948631	0.152517	0.420551	0.18835	0.0281606	0.583038
ENSG00000119630	PGF	placental growth factor [Source:HGNC Symbol;Acc:HGNC:8893]	5228	0.0549632	0.641527	0.492582	0.0753694	0.276946	0.0160116	0.0509504	0.690102	0.0883806	0.505669	0.536361	0.102717	0.228464	0.105489	0.391616	0.375325	-0.0214605	0.932288	0.862457	0.0508494	0.446504	0.0177523	0.0754813	0.73936	0.197341	0.397874	0.645996
ENSG00000119185	ITGB1BP1	integrin subunit beta 1 binding protein 1 [Source:HGNC Symbol;Acc:HGNC:23927]	9270	-0.0844313	0.481266	0.432161	0.109013	-0.0451916	0.703471	0.405252	0.0668767	-0.18294	0.18886	0.376376	0.264231	-0.218346	0.142737	0.42479	0.317261	0.0444212	0.872199	0.856136	0.0530501	0.260851	0.232082	0.239098	0.234843	0.197311	0.0940415	0.583038
ENSG00000198498	TMA16	translation machinery associated 16 homolog [Source:HGNC Symbol;Acc:HGNC:25638]	55319	-0.0105651	0.929729	0.580046	0.0508969	0.0745377	0.528992	0.344147	0.0968987	-0.0899593	0.522663	0.543225	0.0985295	-0.00247539	0.986925	0.756304	0.050031	-0.0632852	0.769699	0.836354	0.0601611	0.062928	0.717934	0.441961	0.0655331	0.188068	0.0462589	0.583038
ENSG00000187109	NAP1L1	nucleosome assembly protein 1 like 1 [Source:HGNC Symbol;Acc:HGNC:7637]	4673	-0.126553	0.286751	0.337383	0.188498	0.168778	0.149921	0.16685	0.306321	-0.160298	0.25024	0.418586	0.212864	0.0203572	0.892161	0.736454	0.0521259	-0.220314	0.460738	0.765419	0.117029	0.464918	0.0424168	0.105608	0.586553	0.197201	0.0694731	0.583038
ENSG00000187955	COL14A1	collagen type XIV alpha 1 chain [Source:HGNC Symbol;Acc:HGNC:2191]	7373	-0.0379154	0.749217	0.530292	0.061868	0.140462	0.229535	0.211555	0.227461	-0.0840804	0.542547	0.549711	0.0939424	0.00459808	0.975245	0.754742	0.0501112	0.114534	0.701546	0.827042	0.0675103	0.451771	0.0481308	0.112383	0.56162	0.197055	0.244479	0.59819
ENSG00000138081	FBXO11	F-box protein 11 [Source:HGNC Symbol;Acc:HGNC:13590]	80204	-0.0977188	0.417636	0.403511	0.128785	0.18236	0.12448	0.149825	0.341613	-0.14905	0.291822	0.443908	0.186111	0.00348348	0.981738	0.755799	0.0500605	-0.248366	0.330766	0.714452	0.169619	0.364703	0.0669678	0.129415	0.494117	0.187988	0.0438722	0.583038
ENSG00000076382	SPAG5	sperm associated antigen 5 [Source:HGNC Symbol;Acc:HGNC:13452]	10615	-0.0396604	0.74342	0.528151	0.0624475	0.0453825	0.704966	0.405598	0.0666969	-0.217082	0.117165	0.312318	0.355154	0.0144634	0.923123	0.742522	0.0510764	0.413634	0.077738	0.515913	0.462808	0.0272607	0.890244	0.491868	0.052243	0.196798	0.169204	0.583038
ENSG00000123094	RASSF8	Ras association domain family member 8 [Source:HGNC Symbol;Acc:HGNC:13232]	11228	-0.0679911	0.563598	0.465394	0.0893213	0.167642	0.148061	0.1656	0.308683	-0.123121	0.354768	0.480438	0.153951	0.0355628	0.803631	0.716009	0.0571752	0.0225827	0.933196	0.862457	0.0508267	0.429549	0.0354087	0.0981969	0.621123	0.19677	0.118725	0.583038
ENSG00000147905	ZCCHC7	zinc finger CCHC-type containing 7 [Source:HGNC Symbol;Acc:HGNC:26209]	84186	-0.132643	0.271879	0.329032	0.197625	0.123544	0.301141	0.247524	0.180231	-0.260876	0.0646001	0.254497	0.468163	-0.0843949	0.581443	0.648121	0.085863	0.155869	0.585861	0.804558	0.0858632	0.479185	0.0267339	0.0878306	0.672097	0.196732	0.0974683	0.583038
ENSG00000183287	CCBE1	collagen and calcium binding EGF domains 1 [Source:HGNC Symbol;Acc:HGNC:29426]	147372	-0.000633258	0.995726	0.59621	0.0500033	0.30561	0.00768741	0.0360904	0.778799	-0.0597806	0.669218	0.594361	0.0713664	0.263762	0.0752524	0.360441	0.439652	0.215625	0.466701	0.767123	0.115195	0.459576	0.0431613	0.106639	0.583154	0.196651	0.330324	0.624272
ENSG00000047365	ARAP2	ArfGAP with RhoGAP domain, ankyrin repeat and PH domain 2 [Source:HGNC Symbol;Acc:HGNC:16924]	116984	-0.0709503	0.551338	0.460082	0.0918991	0.0844998	0.47307	0.321538	0.11131	-0.191159	0.17361	0.365237	0.280033	-0.11475	0.448177	0.596088	0.118944	0.114083	0.701659	0.827042	0.0674962	0.464121	0.040827	0.104369	0.593974	0.187867	0.0477712	0.583038
ENSG00000042429	MED17	mediator complex subunit 17 [Source:HGNC Symbol;Acc:HGNC:2375]	9440	-0.0836497	0.480402	0.431716	0.109252	0.317497	0.00574656	0.0313143	0.808131	-0.129492	0.334924	0.468919	0.163186	0.162708	0.257622	0.506388	0.207721	-0.198114	0.484692	0.774062	0.109903	0.571802	0.00579954	0.0553648	0.876553	0.18785	0.0365542	0.583038
ENSG00000234745	HLA-B	major histocompatibility complex, class I, B [Source:HGNC Symbol;Acc:HGNC:4932]	3106	-0.0268384	0.823889	0.551752	0.05573	0.141901	0.232495	0.213201	0.225164	-0.0585195	0.677817	0.59634	0.0701907	0.0519595	0.730756	0.697914	0.0638	-0.264435	0.314148	0.704075	0.178607	0.275864	0.188383	0.214409	0.276315	0.196012	0.0979843	0.583038
ENSG00000067955	CBFB	core-binding factor subunit beta [Source:HGNC Symbol;Acc:HGNC:1539]	865	0.147116	0.2038	0.286067	0.249038	0.253677	0.0253488	0.0634064	0.623604	0.124774	0.360653	0.481409	0.151352	0.144248	0.323841	0.54161	0.168683	-0.261829	0.322212	0.709426	0.174163	0.380416	0.0649982	0.127707	0.500333	0.187352	0.00641493	0.583038
ENSG00000168477	TNXB	tenascin XB [Source:HGNC Symbol;Acc:HGNC:11976]	7148	-0.245245	0.0369611	0.119516	0.563022	-0.0888388	0.44979	0.311588	0.11822	-0.260019	0.0553294	0.239664	0.496582	-0.132768	0.36645	0.562079	0.14885	-0.198492	0.464715	0.766939	0.115802	0.00363461	0.986856	0.51671	0.0500319	0.195915	0.220178	0.589863
ENSG00000147162	OGT	O-linked N-acetylglucosamine (GlcNAc) transferase [Source:HGNC Symbol;Acc:HGNC:8127]	8473	-0.0745407	0.537363	0.454345	0.0949789	0.202222	0.0884901	0.123356	0.406358	-0.118666	0.40572	0.50089	0.133322	0.127648	0.403966	0.578547	0.133967	-0.212762	0.487059	0.774962	0.109233	0.250973	0.305445	0.276266	0.183585	0.187268	0.0383994	0.583038
ENSG00000183853	KIRREL1	kirre like nephrin family adhesion molecule 1 [Source:HGNC Symbol;Acc:HGNC:15734]	55243	-0.172263	0.137377	0.234903	0.322877	0.155498	0.175716	0.182829	0.276477	-0.194184	0.144428	0.339738	0.315008	0.0649888	0.650949	0.673116	0.074	-0.0261827	0.931991	0.862457	0.0508568	0.461519	0.0488568	0.113042	0.558629	0.195064	0.164895	0.583038
ENSG00000171862	PTEN	phosphatase and tensin homolog [Source:HGNC Symbol;Acc:HGNC:9588]	5728	-0.0518265	0.665359	0.501177	0.0718537	0.183791	0.118706	0.146004	0.35065	-0.173228	0.202627	0.387197	0.251156	-0.0179297	0.902663	0.739305	0.0517296	0.141675	0.639443	0.814473	0.0763378	0.413162	0.0775994	0.137366	0.463185	0.187154	0.0261961	0.583038
ENSG00000106948	AKNA	AT-hook transcription factor [Source:HGNC Symbol;Acc:HGNC:24108]	80709	-0.0322597	0.787244	0.541411	0.0584417	0.0966111	0.413156	0.296258	0.130359	-0.171552	0.218113	0.397257	0.23762	-0.160327	0.28351	0.520581	0.191053	0.133376	0.662253	0.81999	0.0728386	0.377396	0.11325	0.166611	0.382793	0.195004	0.239449	0.597149
ENSG00000150593	PDCD4	programmed cell death 4 [Source:HGNC Symbol;Acc:HGNC:8763]	27250	-0.0424828	0.720369	0.520788	0.0649087	0.310649	0.006945	0.0344675	0.789402	-0.0968876	0.495774	0.531294	0.105276	0.249026	0.0994245	0.388636	0.386682	-0.0962996	0.735405	0.830961	0.0635751	0.46752	0.0300293	0.0912861	0.651456	0.194856	0.0906234	0.583038
ENSG00000181852	RNF41	ring finger protein 41 [Source:HGNC Symbol;Acc:HGNC:18401]	10193	0.00127813	0.991332	0.595181	0.0500136	0.237559	0.038872	0.0795835	0.554546	-0.0504909	0.71194	0.608502	0.0659097	0.143935	0.324463	0.542015	0.168368	0.0380205	0.89811	0.859901	0.0519308	0.486218	0.0301264	0.0913998	0.650873	0.194767	0.0620404	0.583038
ENSG00000175274	TP53I11	tumor protein p53 inducible protein 11 [Source:HGNC Symbol;Acc:HGNC:16842]	9537	0.263449	0.0247329	0.0961668	0.627373	0.379545	0.000883635	0.0148435	0.930834	0.261432	0.0575057	0.243216	0.489559	0.367136	0.011917	0.24259	0.734599	0.117173	0.661751	0.819772	0.0729122	0.455324	0.0239599	0.0834538	0.690944	0.194766	0.0850695	0.583038
ENSG00000087116	ADAMTS2	ADAM metallopeptidase with thrombospondin type 1 motif 2 [Source:HGNC Symbol;Acc:HGNC:218]	9509	0.0591722	0.62307	0.486516	0.0783205	0.130566	0.271682	0.233196	0.19775	0.00226341	0.98722	0.681837	0.0500296	0.123319	0.414253	0.583649	0.130247	0.0827161	0.77414	0.836354	0.059759	0.0817961	0.724769	0.44444	0.064749	0.194763	0.204121	0.584247
ENSG00000004700	RECQL	RecQ like helicase [Source:HGNC Symbol;Acc:HGNC:9948]	5965	0.052929	0.657456	0.497997	0.0729839	0.273918	0.0185384	0.0542533	0.669799	0.0290722	0.835898	0.643732	0.0549725	0.183814	0.219101	0.483254	0.236795	-0.0740395	0.803449	0.843311	0.0573267	0.5238	0.0184022	0.0761898	0.733807	0.194356	0.0584579	0.583038
ENSG00000108828	VAT1	vesicle amine transport 1 [Source:HGNC Symbol;Acc:HGNC:16919]	10493	0.0943446	0.426456	0.408331	0.12576	0.313531	0.00647597	0.0333451	0.796473	0.0669319	0.63599	0.584163	0.0762993	0.250325	0.0953355	0.386377	0.394723	-0.00956822	0.975319	0.868597	0.0501125	0.392635	0.102047	0.158611	0.404992	0.186274	0.0456325	0.583038
ENSG00000213983	AP1G2	adaptor related protein complex 1 subunit gamma 2 [Source:HGNC Symbol;Acc:HGNC:556]	8906	0.057423	0.622592	0.48645	0.0783996	0.0567635	0.622885	0.378531	0.0783511	-0.114294	0.410134	0.502299	0.131719	-0.0826912	0.57872	0.647283	0.0863925	0.69037	0.0100415	0.334738	0.817823	0.275722	0.235457	0.240539	0.232045	0.194211	0.111449	0.583038
ENSG00000254858	MPV17L2	MPV17 mitochondrial inner membrane protein like 2 [Source:HGNC Symbol;Acc:HGNC:28177]	84769	0.216631	0.0674166	0.163515	0.457063	0.165492	0.159493	0.172845	0.294643	0.0617761	0.658089	0.590826	0.0729485	-0.00765135	0.95924	0.752478	0.0503018	0.817581	0.00187323	0.22823	0.952061	0.587895	0.0072726	0.0580002	0.854288	0.193974	0.0571243	0.583038
ENSG00000166886	NAB2	NGFI-A binding protein 2 [Source:HGNC Symbol;Acc:HGNC:7627]	4665	-0.178099	0.132238	0.231203	0.330118	0.159021	0.174801	0.18226	0.277452	-0.265218	0.0500889	0.231851	0.514515	-0.0220055	0.881163	0.733874	0.0525859	0.0297155	0.921918	0.8609	0.0511306	0.476309	0.0385763	0.102157	0.604885	0.193953	0.169135	0.583038
ENSG00000111145	ELK3	ETS transcription factor ELK3 [Source:HGNC Symbol;Acc:HGNC:3325]	2004	0.0394709	0.738485	0.526542	0.0629533	0.265732	0.0211458	0.0573708	0.650837	0.0227152	0.870589	0.652857	0.0530718	0.177305	0.232925	0.490931	0.225695	-0.214917	0.456018	0.765015	0.11851	0.46107	0.0364378	0.0994584	0.615728	0.186048	0.0258043	0.583038
ENSG00000099992	TBC1D10A	TBC1 domain family member 10A [Source:HGNC Symbol;Acc:HGNC:23609]	83874	-0.0467936	0.697148	0.51231	0.0676499	0.281854	0.0160727	0.050954	0.689585	-0.198207	0.159353	0.35341	0.296256	0.0896883	0.554864	0.640007	0.0912605	0.334339	0.26958	0.68187	0.206345	0.618256	0.00569011	0.0553648	0.878306	0.193549	0.127253	0.583038
ENSG00000117036	ETV3	ETS variant transcription factor 3 [Source:HGNC Symbol;Acc:HGNC:3492]	2117	-0.170524	0.15117	0.245089	0.304754	0.223624	0.0559789	0.0967353	0.490885	-0.209205	0.135812	0.330786	0.326788	0.111304	0.461894	0.601929	0.11476	-0.121684	0.689563	0.824794	0.0690454	0.554574	0.0143478	0.0702179	0.770789	0.193493	0.21569	0.589
ENSG00000162576	MXRA8	matrix remodeling associated 8 [Source:HGNC Symbol;Acc:HGNC:7542]	54587	-0.0205343	0.863752	0.562385	0.0534017	0.0631815	0.593298	0.368059	0.0835294	-0.0658248	0.636743	0.584163	0.0761805	-0.086079	0.564285	0.643227	0.0892879	0.14268	0.623022	0.811882	0.0790549	0.329333	0.148663	0.189697	0.325218	0.193344	0.312839	0.616181
ENSG00000105472	CLEC11A	C-type lectin domain containing 11A [Source:HGNC Symbol;Acc:HGNC:10576]	6320	0.0858256	0.476299	0.429346	0.110397	0.226416	0.055332	0.0963675	0.492972	0.0279972	0.842851	0.644946	0.0545533	0.0701448	0.642812	0.669203	0.0752346	0.302718	0.310662	0.701933	0.180577	0.55412	0.0135681	0.0691893	0.778622	0.193193	0.225336	0.590134
ENSG00000110799	VWF	von Willebrand factor [Source:HGNC Symbol;Acc:HGNC:12726]	7450	-0.110612	0.333384	0.362831	0.163483	-0.145713	0.196822	0.194555	0.255438	-0.183758	0.173244	0.36504	0.280431	-0.284753	0.0471703	0.327583	0.5252	-0.0270336	0.925238	0.861521	0.0510362	-0.0299483	0.89742	0.494031	0.0519573	0.193004	0.159889	0.583038
ENSG00000101109	STK4	serine/threonine kinase 4 [Source:HGNC Symbol;Acc:HGNC:11408]	6789	0.00260619	0.982618	0.594206	0.0500547	0.278052	0.0169691	0.0523247	0.682157	-0.0951782	0.498679	0.532962	0.104515	0.0610263	0.685977	0.683375	0.0691118	0.0922669	0.764789	0.835886	0.0606161	0.608677	0.0068342	0.0570506	0.860671	0.1928	0.0716821	0.583038
ENSG00000169926	KLF13	KLF transcription factor 13 [Source:HGNC Symbol;Acc:HGNC:13672]	51621	0.237944	0.0437041	0.131877	0.534528	0.184494	0.115571	0.143542	0.355742	0.0368996	0.795368	0.633338	0.0578089	0.181295	0.232031	0.490363	0.226388	0.592718	0.0222996	0.391324	0.702969	0.0851627	0.704493	0.437552	0.0671445	0.186007	0.0259934	0.583038
ENSG00000153551	CMTM7	CKLF like MARVEL transmembrane domain containing 7 [Source:HGNC Symbol;Acc:HGNC:19178]	112616	-0.0222077	0.85236	0.559786	0.0540028	-0.0199457	0.865837	0.456449	0.0532972	-0.040634	0.774535	0.628317	0.0595367	-0.156138	0.302592	0.532079	0.179976	-0.123283	0.659031	0.819459	0.073314	0.051805	0.818515	0.473302	0.0562218	0.192586	0.0669097	0.583038
ENSG00000133706	LARS1	leucyl-tRNA synthetase 1 [Source:HGNC Symbol;Acc:HGNC:6512]	51520	0.0233981	0.845831	0.557268	0.0543703	0.156	0.187968	0.189232	0.26394	-0.0856866	0.543563	0.55018	0.0937165	0.0575654	0.703611	0.690301	0.0668994	0.294482	0.248675	0.674044	0.221554	0.339504	0.092095	0.149837	0.426857	0.192148	0.0647332	0.583038
ENSG00000095397	WHRN	whirlin [Source:HGNC Symbol;Acc:HGNC:16361]	25861	-0.0221117	0.852185	0.559724	0.0540124	0.0864526	0.460864	0.316769	0.11486	-0.0846777	0.549072	0.553465	0.0925069	-0.131876	0.383204	0.569379	0.141936	0.12756	0.667016	0.821332	0.0721467	0.401553	0.0802841	0.140036	0.455996	0.191979	0.214198	0.587962
ENSG00000169826	CSGALNACT2	chondroitin sulfate N-acetylgalactosaminyltransferase 2 [Source:HGNC Symbol;Acc:HGNC:24292]	55454	0.0725634	0.530442	0.451368	0.096562	0.347992	0.00179895	0.0189106	0.896005	0.0782646	0.559643	0.557821	0.0902514	0.23687	0.0963679	0.387303	0.392662	-0.0730526	0.801255	0.84262	0.0574957	0.566034	0.00766502	0.0594933	0.848732	0.191959	0.14547	0.583038
ENSG00000071073	MGAT4A	alpha-1,3-mannosyl-glycoprotein 4-beta-N-acetylglucosaminyltransferase A [Source:HGNC Symbol;Acc:HGNC:7047]	11320	0.0663642	0.583281	0.473367	0.0854137	-0.0342027	0.775182	0.428865	0.0594592	-0.034414	0.810275	0.637323	0.0566865	-0.250807	0.0991091	0.388636	0.387291	0.377415	0.210498	0.647372	0.25402	0.319617	0.187468	0.213881	0.277304	0.191944	0.0635785	0.583038
ENSG00000142875	PRKACB	protein kinase cAMP-activated catalytic subunit beta [Source:HGNC Symbol;Acc:HGNC:9381]	5567	0.167998	0.137596	0.235022	0.322574	0.171316	0.125761	0.150536	0.339667	0.132586	0.338548	0.471835	0.161443	0.074031	0.618945	0.660933	0.079083	-0.133222	0.639415	0.814473	0.0763424	0.150473	0.510403	0.367538	0.102925	0.185836	0.000541767	0.583038
ENSG00000106692	FKTN	fukutin [Source:HGNC Symbol;Acc:HGNC:3622]	2218	0.146245	0.222522	0.297053	0.233048	-0.176206	0.136583	0.158131	0.323978	-0.104043	0.462702	0.521007	0.11452	-0.236238	0.117035	0.402935	0.355368	0.460389	0.0974374	0.535134	0.414846	-0.330784	0.143131	0.186209	0.333178	0.191876	0.0511643	0.583038
ENSG00000123329	ARHGAP9	Rho GTPase activating protein 9 [Source:HGNC Symbol;Acc:HGNC:14130]	64333	0.112514	0.333607	0.363014	0.163374	0.212274	0.0633275	0.102751	0.468534	0.00513002	0.970073	0.677295	0.0501626	0.0319097	0.827596	0.7198	0.0554984	0.322109	0.275838	0.685315	0.20209	0.486345	0.0324397	0.0945299	0.637395	0.191835	0.141697	0.583038
ENSG00000156265	MAP3K7CL	MAP3K7 C-terminal like [Source:HGNC Symbol;Acc:HGNC:16457]	56911	-0.0345469	0.774952	0.538631	0.0594792	0.0693617	0.561494	0.355149	0.0897557	-0.0500427	0.726171	0.613397	0.0642983	-0.0462959	0.762435	0.706155	0.0606277	-0.190592	0.497336	0.781303	0.106389	0.269808	0.226883	0.236758	0.239255	0.191654	0.0584629	0.583038
ENSG00000235453	SMIM27	small integral membrane protein 27 [Source:HGNC Symbol;Acc:HGNC:31420]	100129250	-0.0701738	0.559425	0.46298	0.0901862	0.0378713	0.750344	0.420769	0.061757	-0.143494	0.309007	0.454546	0.176457	-0.045677	0.763357	0.706155	0.0605422	0.22228	0.469189	0.768064	0.114442	0.217343	0.378454	0.311303	0.147094	0.19149	0.27592	0.604145
ENSG00000178971	CTC1	CST telomere replication complex component 1 [Source:HGNC Symbol;Acc:HGNC:26169]	80169	0.0276152	0.813959	0.549022	0.0564095	0.125287	0.279018	0.23664	0.193166	-0.128856	0.358438	0.481059	0.152323	0.0312221	0.836015	0.72221	0.0549653	0.264672	0.34825	0.727448	0.160835	0.0961439	0.67574	0.42765	0.070913	0.191468	0.0890979	0.583038
ENSG00000174307	PHLDA3	pleckstrin homology like domain family A member 3 [Source:HGNC Symbol;Acc:HGNC:8934]	23612	0.184746	0.11276	0.212465	0.360425	0.198872	0.0840172	0.120128	0.416115	0.0643488	0.640462	0.585103	0.0755983	0.0573738	0.697673	0.687782	0.0676266	0.519398	0.059535	0.495289	0.518497	0.502643	0.0204246	0.078547	0.717311	0.191345	0.224885	0.590134
ENSG00000144214	LYG1	lysozyme g1 [Source:HGNC Symbol;Acc:HGNC:27014]	129530	0.0374912	0.735766	0.525456	0.0632368	0.130748	0.232486	0.213201	0.225171	-0.113492	0.391347	0.495265	0.138734	-0.0357852	0.801392	0.715047	0.0573441	0.408735	0.0729647	0.509963	0.476158	0.23564	0.210353	0.227136	0.254157	0.191149	0.160595	0.583038
ENSG00000112210	RAB23	RAB23, member RAS oncogene family [Source:HGNC Symbol;Acc:HGNC:14263]	51715	0.0614905	0.599963	0.479492	0.0823133	0.198408	0.0847986	0.120787	0.414376	0.0250873	0.856328	0.648974	0.0537957	0.048439	0.744216	0.701924	0.0623951	-0.00678728	0.982275	0.869002	0.050058	0.354266	0.137931	0.182665	0.340972	0.185717	0.0449218	0.583038
ENSG00000074660	SCARF1	scavenger receptor class F member 1 [Source:HGNC Symbol;Acc:HGNC:16820]	8578	0.220859	0.0626401	0.15819	0.470526	0.457637	5.32537e-05	0.00628354	0.988903	0.185556	0.187787	0.376082	0.265295	0.40356	0.00630687	0.233761	0.805701	0.171355	0.547632	0.797378	0.0939178	0.518644	0.0147177	0.0708947	0.767164	0.190865	0.161462	0.583038
ENSG00000128228	SDF2L1	stromal cell derived factor 2 like 1 [Source:HGNC Symbol;Acc:HGNC:10676]	23753	-0.108053	0.370953	0.381685	0.146589	0.0623195	0.602513	0.371218	0.0818558	-0.216344	0.126039	0.319938	0.341123	-0.138852	0.362319	0.559723	0.150627	0.284873	0.307159	0.6991	0.182589	0.510448	0.0152359	0.0718663	0.762177	0.190848	0.3463	0.629129
ENSG00000143013	LMO4	LIM domain only 4 [Source:HGNC Symbol;Acc:HGNC:6644]	8543	-0.0389958	0.745716	0.528682	0.0622162	0.131868	0.266144	0.231044	0.201315	-0.208396	0.141433	0.336231	0.319018	-0.139849	0.359591	0.559014	0.151816	0.35076	0.231327	0.661153	0.235476	0.554824	0.0120337	0.0667466	0.794856	0.190802	0.0837314	0.583038
ENSG00000081307	UBA5	ubiquitin like modifier activating enzyme 5 [Source:HGNC Symbol;Acc:HGNC:23230]	79876	0.0393975	0.744234	0.528285	0.0623653	0.190964	0.107475	0.137748	0.369552	-0.0750754	0.597819	0.570313	0.0827873	0.1366	0.369487	0.563926	0.147563	0.444655	0.101074	0.538806	0.407035	0.330261	0.133366	0.179436	0.348078	0.185012	0.0108514	0.583038
ENSG00000165949	IFI27	interferon alpha inducible protein 27 [Source:HGNC Symbol;Acc:HGNC:5397]	3429	-0.209895	0.0799399	0.178899	0.425439	0.0234128	0.84481	0.449883	0.0544293	-0.198866	0.15514	0.35015	0.301354	-0.0701979	0.641911	0.668655	0.0753735	-0.536772	0.0471343	0.468305	0.565786	-0.00929557	0.96783	0.512257	0.0501912	0.190544	0.480768	0.66961
ENSG00000162618	ADGRL4	adhesion G protein-coupled receptor L4 [Source:HGNC Symbol;Acc:HGNC:20822]	64123	-0.0351063	0.769308	0.536341	0.0599777	0.11272	0.340069	0.265481	0.160285	0.0368229	0.788856	0.631277	0.0583288	0.0416052	0.777683	0.709612	0.0592635	-0.530556	0.0283746	0.411511	0.661601	0.128307	0.536625	0.376979	0.0964542	0.190343	0.163632	0.583038
ENSG00000163818	LZTFL1	leucine zipper transcription factor like 1 [Source:HGNC Symbol;Acc:HGNC:6741]	54585	-0.316825	0.00674028	0.0505762	0.79245	-0.000708239	0.995215	0.489908	0.0500041	-0.339882	0.0133208	0.146569	0.720456	-0.187101	0.211461	0.475869	0.243293	-0.34664	0.192395	0.629763	0.272047	0.365801	0.0822797	0.14194	0.450797	0.190324	0.0898805	0.583038
ENSG00000176142	TMEM39A	transmembrane protein 39A [Source:HGNC Symbol;Acc:HGNC:25600]	55254	-0.121324	0.308588	0.349198	0.176155	0.207495	0.0766356	0.114261	0.433322	-0.132904	0.341401	0.47313	0.160089	0.21852	0.142499	0.424789	0.317581	-0.269891	0.36408	0.732832	0.15342	0.31771	0.179139	0.209207	0.28657	0.190243	0.233378	0.595212
ENSG00000125775	SDCBP2	syndecan binding protein 2 [Source:HGNC Symbol;Acc:HGNC:15756]	27111	0.233711	0.0375917	0.120681	0.560187	0.29918	0.00666033	0.0338327	0.793656	0.154011	0.249623	0.418528	0.213302	0.155504	0.278355	0.51767	0.194214	0.387117	0.130498	0.571329	0.352678	0.53825	0.00486869	0.0543939	0.891973	0.19022	0.0733441	0.583038
ENSG00000108468	CBX1	chromobox 1 [Source:HGNC Symbol;Acc:HGNC:1551]	10951	-0.0381634	0.745646	0.528682	0.0622232	0.267998	0.0194154	0.0551068	0.663217	-0.15879	0.234709	0.407907	0.22432	0.153325	0.284823	0.521041	0.19026	0.22627	0.397567	0.74521	0.139229	0.56176	0.00382092	0.0534384	0.910891	0.182402	0.0192337	0.583038
ENSG00000188783	PRELP	proline and arginine rich end leucine rich repeat protein [Source:HGNC Symbol;Acc:HGNC:9357]	5549	-0.160594	0.178132	0.267648	0.27393	-0.0448968	0.704903	0.405598	0.0667044	-0.172079	0.21629	0.396271	0.239154	-0.121551	0.416647	0.583649	0.129401	-0.175932	0.50344	0.783588	0.10475	0.0314257	0.882895	0.489713	0.0525563	0.190001	0.190867	0.583038
ENSG00000167508	MVD	mevalonate diphosphate decarboxylase [Source:HGNC Symbol;Acc:HGNC:7529]	4597	0.0958095	0.420945	0.404984	0.127638	0.270056	0.0201425	0.0559506	0.657921	-0.0428155	0.760897	0.624658	0.060771	-0.0414974	0.783176	0.71082	0.0587972	0.474945	0.0873283	0.52548	0.438161	0.582774	0.00549729	0.0553648	0.881432	0.189915	0.225187	0.590134
ENSG00000164631	ZNF12	zinc finger protein 12 [Source:HGNC Symbol;Acc:HGNC:12902]	7559	-0.118823	0.322891	0.357422	0.168684	0.135346	0.254637	0.225489	0.209032	-0.133415	0.34061	0.472767	0.160463	0.00827887	0.956148	0.751639	0.0503493	-0.179648	0.524133	0.789356	0.0994592	0.328501	0.138493	0.183133	0.340113	0.189834	0.0908978	0.583038
ENSG00000128891	CCDC32	coiled-coil domain containing 32 [Source:HGNC Symbol;Acc:HGNC:28295]	90416	0.234277	0.0385287	0.122736	0.556044	0.168715	0.134245	0.156574	0.327256	0.276021	0.0357415	0.206266	0.573129	0.193311	0.174158	0.448215	0.279438	-0.162728	0.57977	0.802208	0.0870718	0.104383	0.660133	0.422407	0.0731507	0.189766	0.0839178	0.583038
ENSG00000166532	RIMKLB	ribosomal modification protein rimK like family member B [Source:HGNC Symbol;Acc:HGNC:29228]	57494	-0.0786933	0.51172	0.443758	0.101046	0.149561	0.20599	0.199691	0.247081	-0.16903	0.231984	0.40581	0.226426	0.0472011	0.756666	0.705419	0.0611709	0.0879132	0.767794	0.836354	0.0603363	0.327289	0.161577	0.198583	0.307842	0.189529	0.106145	0.583038
ENSG00000214548	MEG3	maternally expressed 3 [Source:HGNC Symbol;Acc:HGNC:14575]	55384	-0.0900606	0.456706	0.421516	0.116105	0.118348	0.322285	0.257319	0.168991	-0.181359	0.201223	0.386385	0.252441	0.0733563	0.631376	0.665142	0.0770354	0.0378238	0.901807	0.859901	0.0517923	0.0610476	0.804837	0.468839	0.0572208	0.189482	0.252661	0.599907
ENSG00000118257	NRP2	neuropilin 2 [Source:HGNC Symbol;Acc:HGNC:8005]	8828	-0.0324753	0.782586	0.540515	0.0588271	0.237631	0.0389075	0.0795998	0.554392	-0.00185552	0.989291	0.682038	0.0500208	0.19543	0.184204	0.45503	0.2689	-0.214406	0.478937	0.772517	0.111558	0.322818	0.178072	0.208734	0.287793	0.189226	0.26604	0.602508
ENSG00000088448	ANKRD10	ankyrin repeat domain 10 [Source:HGNC Symbol;Acc:HGNC:20265]	55608	-0.0513522	0.665742	0.501316	0.0717998	0.328473	0.00428769	0.0270042	0.8345	-0.168614	0.221832	0.399536	0.234537	0.183092	0.215717	0.479462	0.23964	0.298248	0.304594	0.698144	0.184082	0.594424	0.00541811	0.0553648	0.88273	0.189169	0.0958764	0.583038
ENSG00000113300	CNOT6	CCR4-NOT transcription complex subunit 6 [Source:HGNC Symbol;Acc:HGNC:14099]	57472	0.0836743	0.474	0.427986	0.111046	0.281905	0.013249	0.0466683	0.715063	-0.0243014	0.856549	0.648974	0.0537839	0.140685	0.327115	0.543178	0.167033	0.300024	0.233826	0.6623	0.233391	0.524903	0.00471416	0.0538128	0.894651	0.18207	0.0253307	0.583038
ENSG00000021776	AQR	aquarius intron-binding spliceosomal factor [Source:HGNC Symbol;Acc:HGNC:29513]	9716	0.0720604	0.532523	0.452583	0.0960819	0.145359	0.20158	0.197368	0.251046	-0.0754432	0.582349	0.564924	0.085688	0.0385192	0.793499	0.713951	0.0579563	0.380232	0.0536647	0.476582	0.539716	0.244276	0.131986	0.178587	0.350277	0.188666	0.0593787	0.583038
ENSG00000104723	TUSC3	tumor suppressor candidate 3 [Source:HGNC Symbol;Acc:HGNC:30242]	7991	-0.103908	0.382336	0.387614	0.141948	0.20884	0.0739517	0.111635	0.439956	-0.11341	0.418424	0.505353	0.128779	0.189544	0.205356	0.47011	0.248685	-0.104478	0.708182	0.827153	0.0666929	0.261541	0.236847	0.241	0.230907	0.18865	0.171418	0.583038
ENSG00000197872	CYRIA	CYFIP related Rac1 interactor A [Source:HGNC Symbol;Acc:HGNC:25373]	81553	-0.0697754	0.554907	0.461356	0.0911369	0.169682	0.144683	0.163475	0.313052	-0.102077	0.466098	0.522459	0.113519	-0.00131739	0.993011	0.757064	0.0500089	-0.204086	0.479274	0.772517	0.11146	0.479808	0.0285147	0.09013	0.660726	0.18856	0.163688	0.583038
ENSG00000149591	TAGLN	transgelin [Source:HGNC Symbol;Acc:HGNC:11553]	6876	-0.260949	0.0264251	0.0995303	0.61718	-0.169559	0.148062	0.1656	0.308681	-0.252117	0.0649089	0.254878	0.467279	-0.255123	0.0817867	0.369033	0.423923	-0.311809	0.280162	0.686603	0.199224	-0.0407128	0.863404	0.484516	0.0534899	0.188555	0.437464	0.657269
ENSG00000122862	SRGN	serglycin [Source:HGNC Symbol;Acc:HGNC:9361]	5552	0.0451726	0.699633	0.513092	0.0673436	0.142183	0.21787	0.206402	0.23687	0.0695296	0.612864	0.574572	0.0801197	0.00211054	0.988577	0.756304	0.0500237	-0.412402	0.158516	0.599314	0.311818	0.350217	0.136304	0.181295	0.343476	0.188506	0.237203	0.595631
ENSG00000173457	PPP1R14B	protein phosphatase 1 regulatory inhibitor subunit 14B [Source:HGNC Symbol;Acc:HGNC:9057]	26472	0.0559943	0.637663	0.491675	0.0759703	0.0952467	0.417513	0.297756	0.128828	-0.0443484	0.748253	0.621216	0.0619904	-0.0656033	0.657654	0.674504	0.0730116	0.297315	0.282403	0.687402	0.197762	0.464852	0.0283172	0.0898281	0.661961	0.181833	0.0449924	0.583038
ENSG00000032444	PNPLA6	patatin like phospholipase domain containing 6 [Source:HGNC Symbol;Acc:HGNC:16268]	10908	0.419707	0.00016115	0.00944223	0.976249	0.367211	0.00094456	0.0152972	0.928064	0.371261	0.00634905	0.117146	0.80504	0.387008	0.0080404	0.239527	0.780488	0.793893	0.000520715	0.185565	0.987304	0.213988	0.317404	0.28211	0.176794	0.181529	0.0248032	0.583038
ENSG00000115461	IGFBP5	insulin like growth factor binding protein 5 [Source:HGNC Symbol;Acc:HGNC:5474]	3488	-0.26825	0.0227336	0.0921624	0.640113	-0.09517	0.419958	0.298748	0.127979	-0.240321	0.0811301	0.275865	0.42545	-0.159303	0.28414	0.52076	0.190672	-0.333802	0.209656	0.646528	0.254817	0.0764897	0.726957	0.445052	0.0645029	0.188019	0.447505	0.660576
ENSG00000166750	SLFN5	schlafen family member 5 [Source:HGNC Symbol;Acc:HGNC:28286]	162394	0.18418	0.11757	0.217507	0.352479	0.355731	0.00182032	0.0190705	0.895319	0.152074	0.280015	0.438319	0.193188	0.256899	0.0864694	0.376756	0.413349	0.0859861	0.764553	0.835886	0.0606382	0.436362	0.0465661	0.110373	0.568195	0.188005	0.129421	0.583038
ENSG00000186866	POFUT2	protein O-fucosyltransferase 2 [Source:HGNC Symbol;Acc:HGNC:14683]	23275	0.0971535	0.41409	0.402093	0.130029	0.321148	0.00537702	0.0300963	0.814387	-0.00552465	0.968817	0.67709	0.0501765	0.242167	0.106344	0.392799	0.373776	0.204399	0.48455	0.774062	0.109944	0.459388	0.0401206	0.103468	0.597346	0.181162	0.00551273	0.583038
ENSG00000006125	AP2B1	adaptor related protein complex 2 subunit beta 1 [Source:HGNC Symbol;Acc:HGNC:563]	163	0.171546	0.142425	0.238647	0.316032	0.28976	0.0112615	0.0436391	0.735331	0.0707776	0.603375	0.571967	0.081785	0.149263	0.305164	0.533462	0.178552	0.324905	0.25059	0.674333	0.220093	0.561357	0.00768869	0.0594933	0.848402	0.180959	0.0104619	0.583038
ENSG00000113734	BNIP1	BCL2 interacting protein 1 [Source:HGNC Symbol;Acc:HGNC:1082]	662	-0.122656	0.294647	0.341374	0.183897	0.0231618	0.841926	0.449133	0.0545982	-0.298316	0.0268468	0.185048	0.619773	-0.119364	0.416037	0.583649	0.129616	0.332211	0.194969	0.632029	0.269363	0.399898	0.0457223	0.109604	0.571816	0.180783	0.0217084	0.583038
ENSG00000256060	TRAPPC2B	trafficking protein particle complex subunit 2B [Source:HGNC Symbol;Acc:HGNC:10710]	10597	-0.0333353	0.777539	0.539119	0.0592554	-0.0271189	0.816305	0.441298	0.0562453	-4.7999e-05	0.999727	0.683409	0.05	-0.20254	0.174667	0.448461	0.278888	-0.501775	0.0391348	0.444094	0.602131	0.224821	0.272081	0.25826	0.204629	0.187431	0.0785849	0.583038
ENSG00000163257	DCAF16	DDB1 and CUL4 associated factor 16 [Source:HGNC Symbol;Acc:HGNC:25987]	54876	-0.0490653	0.684939	0.50911	0.069201	0.165401	0.16472	0.176426	0.288579	-0.117814	0.405729	0.50089	0.133319	0.0980931	0.518757	0.627013	0.0994696	-0.0972466	0.721786	0.828025	0.0650882	0.263826	0.221945	0.233797	0.243564	0.180477	0.025626	0.583038
ENSG00000186469	GNG2	G protein subunit gamma 2 [Source:HGNC Symbol;Acc:HGNC:4404]	54331	0.0184469	0.876254	0.565344	0.0528002	0.234964	0.0425575	0.0836341	0.539108	-0.0517261	0.710452	0.607877	0.066084	0.0422218	0.777411	0.709612	0.059287	-0.0849295	0.773895	0.836354	0.059781	0.560033	0.0101101	0.0634846	0.816992	0.187342	0.132807	0.583038
ENSG00000179523	EIF3J-DT	EIF3J divergent transcript [Source:HGNC Symbol;Acc:HGNC:48616]	645212	-0.114361	0.331355	0.362242	0.164471	-0.0149437	0.898177	0.465066	0.0518898	-0.147981	0.289484	0.442611	0.187483	-0.0414367	0.782812	0.71082	0.0588277	-0.219886	0.458287	0.765243	0.117795	-0.0905637	0.706484	0.438232	0.0668998	0.180475	0.0170884	0.583038
ENSG00000119403	PHF19	PHD finger protein 19 [Source:HGNC Symbol;Acc:HGNC:24566]	26147	-0.0453725	0.705815	0.515851	0.0665952	0.100901	0.395388	0.289073	0.136874	-0.166986	0.235359	0.4084	0.223822	-0.156208	0.300919	0.530708	0.180909	0.196535	0.51743	0.787978	0.101129	0.541525	0.0173545	0.0748343	0.742824	0.180175	0.0480635	0.583038
ENSG00000068796	KIF2A	kinesin family member 2A [Source:HGNC Symbol;Acc:HGNC:6318]	3796	0.0560901	0.640818	0.492582	0.075479	0.315837	0.00674813	0.0339731	0.792332	0.0166359	0.905948	0.662385	0.0516141	0.222908	0.136315	0.419551	0.326079	-0.172261	0.556992	0.798471	0.0918399	0.441197	0.0500936	0.113842	0.553619	0.18715	0.0596237	0.583038
ENSG00000169908	TM4SF1	transmembrane 4 L six family member 1 [Source:HGNC Symbol;Acc:HGNC:11853]	4071	0.0248216	0.836969	0.555449	0.0548962	0.089034	0.454985	0.31392	0.116626	-0.00482149	0.9728	0.678007	0.0501343	-0.00340885	0.982054	0.755799	0.0500584	-0.0951263	0.68985	0.824794	0.0690077	0.159634	0.402677	0.321887	0.137225	0.187077	0.0839102	0.583038
ENSG00000151617	EDNRA	endothelin receptor type A [Source:HGNC Symbol;Acc:HGNC:3179]	1909	-0.217402	0.0676706	0.163877	0.456371	0.101741	0.390895	0.287277	0.138592	-0.231472	0.083546	0.278078	0.419886	0.0214627	0.882317	0.733874	0.0525354	-0.172115	0.52031	0.788616	0.100407	0.34946	0.0941073	0.151945	0.422255	0.187002	0.311256	0.615134
ENSG00000141258	SGSM2	small G protein signaling modulator 2 [Source:HGNC Symbol;Acc:HGNC:29026]	9905	0.124676	0.295463	0.341813	0.18343	0.214161	0.0675493	0.106286	0.456701	0.0750455	0.600856	0.571573	0.082237	0.122599	0.42452	0.587711	0.126674	0.0859498	0.75477	0.833776	0.0615792	0.13911	0.528971	0.374269	0.0982791	0.18688	0.0603103	0.583038
ENSG00000198625	MDM4	MDM4 regulator of p53 [Source:HGNC Symbol;Acc:HGNC:6974]	4194	-0.156366	0.192607	0.277875	0.25943	0.205081	0.0829906	0.119477	0.418423	-0.257357	0.065867	0.256482	0.464561	0.12123	0.423673	0.587085	0.126964	-0.0336121	0.910714	0.859901	0.0514802	0.363871	0.119293	0.170923	0.371728	0.186828	0.125193	0.583038
ENSG00000107249	GLIS3	GLIS family zinc finger 3 [Source:HGNC Symbol;Acc:HGNC:28510]	169792	-0.0101203	0.932316	0.580533	0.0508319	0.290107	0.0122597	0.0450847	0.724873	-0.0452952	0.745076	0.620201	0.0623083	0.258514	0.0799247	0.365692	0.428284	0.122727	0.6798	0.823057	0.0703536	0.494364	0.0277348	0.0892575	0.66564	0.186671	0.178605	0.583038
ENSG00000175115	PACS1	phosphofurin acidic cluster sorting protein 1 [Source:HGNC Symbol;Acc:HGNC:30032]	55690	0.194884	0.0928158	0.192694	0.397351	0.51675	1.95836e-06	0.0031315	0.999136	0.128624	0.351474	0.479329	0.155432	0.496135	0.000465298	0.204834	0.957678	0.24	0.424643	0.75657	0.129053	0.5911	0.00767011	0.0594933	0.848661	0.186593	0.0547782	0.583038
ENSG00000198089	SFI1	SFI1 centrin binding protein [Source:HGNC Symbol;Acc:HGNC:29064]	9814	0.0476485	0.691549	0.510739	0.0683517	0.17649	0.135143	0.157118	0.32599	-0.12928	0.349828	0.478589	0.15618	-0.0773707	0.602444	0.654282	0.0819515	0.307997	0.297459	0.693501	0.188328	0.467151	0.0407126	0.104369	0.594517	0.186582	0.0676375	0.583038
ENSG00000129158	SERGEF	secretion regulating guanine nucleotide exchange factor [Source:HGNC Symbol;Acc:HGNC:17499]	26297	-0.0250495	0.835994	0.555229	0.054956	-0.118959	0.319062	0.255924	0.170639	-0.215219	0.12881	0.323064	0.336946	-0.381163	0.0107722	0.242476	0.746982	0.479167	0.0751212	0.513268	0.47003	0.292133	0.187226	0.213732	0.277566	0.186502	0.113806	0.583038
ENSG00000138801	PAPSS1	3'-phosphoadenosine 5'-phosphosulfate synthase 1 [Source:HGNC Symbol;Acc:HGNC:8603]	9061	0.181062	0.117169	0.217319	0.353129	0.165583	0.147957	0.165589	0.308816	0.124359	0.36727	0.483827	0.148502	0.0371277	0.802242	0.715272	0.0572797	0.195573	0.492879	0.777402	0.107609	0.372476	0.0941961	0.151956	0.422054	0.179836	0.027192	0.583038
ENSG00000125534	PPDPF	pancreatic progenitor cell differentiation and proliferation factor [Source:HGNC Symbol;Acc:HGNC:16142]	79144	0.028903	0.809437	0.547576	0.0567324	0.115866	0.327267	0.259446	0.166487	0.0488642	0.724749	0.613271	0.0644548	0.0243567	0.869959	0.731187	0.0531021	-0.425215	0.157617	0.597661	0.313002	0.0489115	0.844584	0.479429	0.0545351	0.186147	0.130703	0.583038
ENSG00000138061	CYP1B1	cytochrome P450 family 1 subfamily B member 1 [Source:HGNC Symbol;Acc:HGNC:2597]	1545	0.10287	0.383419	0.388041	0.141518	0.163716	0.159448	0.172845	0.294697	0.105691	0.43973	0.5118	0.121627	0.131685	0.368661	0.563243	0.147912	-0.0664062	0.780229	0.837539	0.0592222	0.111284	0.560577	0.386406	0.0910626	0.186119	0.450054	0.661667
ENSG00000125351	UPF3B	UPF3B regulator of nonsense mediated mRNA decay [Source:HGNC Symbol;Acc:HGNC:20439]	65109	-0.0815444	0.489815	0.435	0.106688	0.0545595	0.640714	0.38471	0.0754951	-0.16918	0.215631	0.395964	0.239713	-0.0862836	0.557481	0.641428	0.0907059	0.113606	0.672375	0.821537	0.0713837	0.33891	0.105358	0.161179	0.398185	0.179819	0.0323228	0.583038
ENSG00000170633	RNF34	ring finger protein 34 [Source:HGNC Symbol;Acc:HGNC:17297]	80196	0.19233	0.0999787	0.200256	0.383278	0.3657	0.00123615	0.0164298	0.915893	0.0966154	0.486752	0.528277	0.107689	0.128941	0.385963	0.570874	0.14084	0.280892	0.330661	0.714374	0.169674	0.70135	0.000450994	0.0418562	0.989264	0.179814	0.0481788	0.583038
ENSG00000167601	AXL	AXL receptor tyrosine kinase [Source:HGNC Symbol;Acc:HGNC:905]	558	-0.164081	0.165007	0.257174	0.288252	0.029422	0.802336	0.436964	0.0572567	-0.161813	0.218544	0.397533	0.23726	-0.0210295	0.882058	0.733874	0.0525467	-0.181715	0.505649	0.784248	0.104166	0.207387	0.343059	0.295137	0.163375	0.185849	0.278817	0.60479
ENSG00000072832	CRMP1	collapsin response mediator protein 1 [Source:HGNC Symbol;Acc:HGNC:2365]	1400	-0.197073	0.0894955	0.189093	0.404228	0.0951647	0.410124	0.295253	0.13144	-0.312976	0.0220009	0.173289	0.650387	-0.121859	0.413487	0.583534	0.130519	-0.214222	0.449471	0.762388	0.120608	0.230919	0.308862	0.277797	0.181607	0.17931	0.0239436	0.583038
ENSG00000102359	SRPX2	sushi repeat containing protein X-linked 2 [Source:HGNC Symbol;Acc:HGNC:30668]	27286	0.169944	0.151676	0.245145	0.304122	0.275658	0.017586	0.052901	0.677206	0.0548713	0.699262	0.603461	0.0674302	0.138779	0.360679	0.559014	0.15134	0.476334	0.102277	0.541036	0.404512	0.473789	0.039429	0.102579	0.600693	0.185825	0.102431	0.583038
ENSG00000122644	ARL4A	ADP ribosylation factor like GTPase 4A [Source:HGNC Symbol;Acc:HGNC:695]	10124	-0.178086	0.135678	0.233722	0.325239	-0.0782639	0.509607	0.336135	0.101571	-0.289188	0.0379875	0.211198	0.562818	-0.330135	0.026738	0.297146	0.620413	0.0531556	0.853512	0.852388	0.0540215	0.396727	0.0739763	0.134714	0.473263	0.177634	0.0441991	0.583038
ENSG00000145241	CENPC	centromere protein C [Source:HGNC Symbol;Acc:HGNC:1854]	1060	-0.160708	0.178413	0.267648	0.273636	0.0743872	0.530618	0.344607	0.0965213	-0.339126	0.0157674	0.156072	0.698065	-0.232412	0.127634	0.414327	0.338708	0.104997	0.722919	0.828025	0.0649588	0.488021	0.0292286	0.0907699	0.656312	0.177412	0.00803656	0.583038
ENSG00000119771	KLHL29	kelch like family member 29 [Source:HGNC Symbol;Acc:HGNC:29404]	114818	-0.0185975	0.876737	0.565344	0.0527782	0.240289	0.040403	0.0813411	0.547995	-0.0763076	0.590206	0.567629	0.0841943	0.13995	0.355703	0.557476	0.153534	0.231985	0.417031	0.752157	0.131806	0.513462	0.016871	0.0740431	0.747103	0.184879	0.107186	0.583038
ENSG00000141556	TBCD	tubulin folding cofactor D [Source:HGNC Symbol;Acc:HGNC:11581]	6904	0.146537	0.202553	0.285035	0.250163	0.218783	0.0530445	0.0942772	0.500523	-0.0748287	0.586813	0.566453	0.0848342	-0.00494865	0.973277	0.754365	0.0501296	0.614901	0.0179448	0.375753	0.737702	0.467052	0.0273067	0.0885777	0.668381	0.184656	0.143063	0.583038
ENSG00000178104	PDE4DIP	phosphodiesterase 4D interacting protein [Source:HGNC Symbol;Acc:HGNC:15580]	9659	0.128028	0.276252	0.331337	0.194876	0.357302	0.00164877	0.0181485	0.900949	0.111339	0.426072	0.507125	0.126146	0.351164	0.0169484	0.267219	0.688113	0.0629871	0.832318	0.847875	0.0552936	0.301505	0.198492	0.220631	0.265757	0.184491	0.215972	0.589339
ENSG00000166173	LARP6	La ribonucleoprotein 6, translational regulator [Source:HGNC Symbol;Acc:HGNC:24012]	55323	-0.0547687	0.640987	0.492582	0.0754529	0.265279	0.0205426	0.0566378	0.655066	-0.17709	0.194648	0.381279	0.258605	0.123202	0.401591	0.578111	0.134847	0.450137	0.122069	0.559131	0.366839	0.675376	0.00139124	0.0489002	0.963887	0.184439	0.220271	0.589863
ENSG00000144504	ANKMY1	ankyrin repeat and MYND domain containing 1 [Source:HGNC Symbol;Acc:HGNC:20987]	51281	0.0294807	0.798689	0.544889	0.0575342	-0.0676952	0.553563	0.352306	0.0914229	-0.256782	0.0554024	0.239664	0.496343	-0.0486063	0.738521	0.699845	0.0629791	0.483197	0.0874386	0.525835	0.437892	-0.152537	0.518416	0.370551	0.100881	0.184283	0.113261	0.583038
ENSG00000158863	FHIP2B	FHF complex subunit HOOK interacting protein 2B [Source:HGNC Symbol;Acc:HGNC:16492]	64760	0.268593	0.0223206	0.0909734	0.642848	0.216996	0.0633738	0.10276	0.468401	0.131628	0.354429	0.480391	0.154102	0.267133	0.0769265	0.361119	0.435506	0.561985	0.0418283	0.452411	0.589273	-0.0234019	0.921011	0.500689	0.0511571	0.18389	0.0921927	0.583038
ENSG00000104549	SQLE	squalene epoxidase [Source:HGNC Symbol;Acc:HGNC:11279]	6713	0.165153	0.145827	0.240848	0.31156	0.259626	0.0196627	0.0552931	0.6614	0.160007	0.248558	0.417994	0.214062	0.16209	0.275679	0.515868	0.195883	0.0973267	0.704703	0.827153	0.0671186	0.279867	0.165783	0.201034	0.302516	0.183686	0.203957	0.584247
ENSG00000136840	ST6GALNAC4	ST6 N-acetylgalactosaminide alpha-2,6-sialyltransferase 4 [Source:HGNC Symbol;Acc:HGNC:17846]	27090	-0.0976616	0.412977	0.401936	0.130423	0.148528	0.20704	0.200239	0.246151	-0.103544	0.450176	0.516418	0.118321	0.038081	0.795917	0.714596	0.0577659	-0.140877	0.632258	0.813383	0.0775057	0.411965	0.0700394	0.131958	0.484743	0.183574	0.176143	0.583038
ENSG00000137752	CASP1	caspase 1 [Source:HGNC Symbol;Acc:HGNC:1499]	834	-0.111573	0.348062	0.370713	0.156576	0.213809	0.0672149	0.106018	0.457614	-0.151615	0.279674	0.438319	0.193397	0.0814321	0.589217	0.649553	0.0843801	-0.162397	0.588472	0.805208	0.0853534	0.458845	0.0458681	0.109759	0.571187	0.183529	0.262532	0.601662
ENSG00000122122	SASH3	SAM and SH3 domain containing 3 [Source:HGNC Symbol;Acc:HGNC:15975]	54440	0.0151476	0.900015	0.571975	0.0518218	0.248124	0.0351798	0.0758502	0.571244	-0.0771562	0.581833	0.564799	0.0857876	0.00197852	0.989499	0.756377	0.05002	0.0684813	0.8238	0.846757	0.055857	0.523207	0.0235256	0.0830867	0.694033	0.18342	0.205463	0.584828
ENSG00000179715	PCED1B	PC-esterase domain containing 1B [Source:HGNC Symbol;Acc:HGNC:28255]	91523	0.0426643	0.723308	0.521965	0.0645808	0.332777	0.00430685	0.0270953	0.834121	-0.100594	0.482109	0.527575	0.108962	0.0387494	0.800861	0.715047	0.0573844	0.335241	0.262806	0.679786	0.2111	0.711097	0.00073357	0.0440298	0.981356	0.183268	0.118719	0.583038
ENSG00000114446	IFT57	intraflagellar transport 57 [Source:HGNC Symbol;Acc:HGNC:17367]	55081	-0.165508	0.165456	0.25751	0.287742	0.0421072	0.7227	0.412557	0.0646483	-0.303122	0.0275029	0.186184	0.615955	-0.125917	0.400323	0.577958	0.13532	0.107322	0.706716	0.827153	0.0668715	0.355177	0.110094	0.16452	0.388812	0.182929	0.0557023	0.583038
ENSG00000091490	SEL1L3	SEL1L family member 3 [Source:HGNC Symbol;Acc:HGNC:29108]	23231	0.172833	0.120374	0.220778	0.347994	0.244318	0.0253887	0.0634064	0.623362	0.0936773	0.483385	0.527862	0.10861	0.248074	0.0803213	0.366782	0.427347	0.314264	0.0885761	0.526779	0.435145	0.0185604	0.904698	0.496088	0.0516877	0.182875	0.087825	0.583038
ENSG00000172081	MOB3A	MOB kinase activator 3A [Source:HGNC Symbol;Acc:HGNC:29802]	126308	0.00576694	0.961439	0.588355	0.0502695	0.288306	0.0129237	0.0461805	0.718231	0.0147796	0.916673	0.664518	0.0512654	0.139298	0.355966	0.557732	0.153417	-0.165673	0.588711	0.805208	0.085307	0.491588	0.034964	0.0977943	0.623492	0.182423	0.128049	0.583038
ENSG00000013441	CLK1	CDC like kinase 1 [Source:HGNC Symbol;Acc:HGNC:2068]	1195	-0.212307	0.070673	0.167653	0.448361	-0.0010077	0.993144	0.48918	0.0500085	-0.334269	0.0143557	0.151172	0.710666	-0.253858	0.0863478	0.376618	0.413617	-0.041108	0.882742	0.857666	0.0525631	0.286671	0.191424	0.21615	0.27307	0.182418	0.168116	0.583038
ENSG00000197461	PDGFA	platelet derived growth factor subunit A [Source:HGNC Symbol;Acc:HGNC:8799]	5154	0.178357	0.13849	0.235548	0.321346	0.307537	0.00890234	0.0390574	0.762774	0.104348	0.460646	0.520336	0.115132	0.156952	0.299472	0.529879	0.181723	-0.0208829	0.941435	0.863275	0.0506349	0.389878	0.0753389	0.135562	0.46942	0.176145	0.0448174	0.583038
ENSG00000044574	HSPA5	heat shock protein family A (Hsp70) member 5 [Source:HGNC Symbol;Acc:HGNC:5238]	3309	-0.110228	0.361733	0.377218	0.150502	0.13837	0.246487	0.220535	0.214763	-0.192367	0.175	0.366384	0.27853	0.006258	0.967389	0.753834	0.0501931	0.185469	0.515254	0.787002	0.10168	0.495245	0.021066	0.0795657	0.712308	0.182302	0.407287	0.648552
ENSG00000092964	DPYSL2	dihydropyrimidinase like 2 [Source:HGNC Symbol;Acc:HGNC:3014]	1808	0.0636936	0.596739	0.478114	0.0828977	0.334349	0.00409581	0.0265727	0.838348	-0.00608596	0.965993	0.676461	0.05021	0.22302	0.141609	0.42378	0.318779	0.122685	0.677495	0.822648	0.0706701	0.550892	0.0116084	0.0662658	0.799568	0.182224	0.162148	0.583038
ENSG00000107625	DDX50	DExD-box helicase 50 [Source:HGNC Symbol;Acc:HGNC:17906]	79009	-0.0557256	0.645373	0.493683	0.07478	0.198897	0.0944478	0.12792	0.394056	-0.118859	0.404842	0.500445	0.133644	0.0804346	0.599477	0.652922	0.0824861	-0.0788658	0.78325	0.838196	0.0589622	0.469161	0.0304129	0.0918593	0.649163	0.182187	0.0784503	0.583038
ENSG00000115159	GPD2	glycerol-3-phosphate dehydrogenase 2 [Source:HGNC Symbol;Acc:HGNC:4456]	2820	-0.0635818	0.577008	0.470747	0.0866291	0.205144	0.0665509	0.105475	0.459439	-0.140492	0.295001	0.445758	0.18427	0.0554565	0.700746	0.688824	0.0672481	-0.0373023	0.899233	0.859901	0.0518882	0.474247	0.0334493	0.0956955	0.631739	0.182138	0.190116	0.583038
ENSG00000183726	TMEM50A	transmembrane protein 50A [Source:HGNC Symbol;Acc:HGNC:30590]	23585	0.245054	0.0324913	0.110833	0.584301	0.312808	0.00537729	0.0300963	0.814383	0.217886	0.112986	0.309139	0.362135	0.220636	0.134661	0.418199	0.328421	-0.0383203	0.896879	0.859451	0.0519781	0.536015	0.014598	0.0708146	0.768331	0.175905	0.00308031	0.583038
ENSG00000189129	PLAC9	placenta associated 9 [Source:HGNC Symbol;Acc:HGNC:19255]	219348	-0.0822249	0.492078	0.435696	0.106084	-0.167677	0.154946	0.170054	0.300095	-0.117049	0.396613	0.496737	0.136717	-0.385491	0.00761072	0.239275	0.786394	0.172362	0.555166	0.798471	0.0922395	0.237641	0.308336	0.277627	0.18191	0.181983	0.318862	0.619059
ENSG00000144283	PKP4	plakophilin 4 [Source:HGNC Symbol;Acc:HGNC:9026]	8502	0.006726	0.954072	0.586288	0.0503824	0.0974707	0.397936	0.290348	0.135913	-0.123843	0.36575	0.483439	0.14915	-0.0538572	0.71432	0.694639	0.0656333	0.428394	0.132707	0.574696	0.349126	0.455234	0.042002	0.105131	0.588467	0.175139	0.0127001	0.583038
ENSG00000135912	TTLL4	tubulin tyrosine ligase like 4 [Source:HGNC Symbol;Acc:HGNC:28976]	9654	0.161514	0.159299	0.252075	0.294873	0.226338	0.0449624	0.0860781	0.529613	0.0776909	0.575366	0.562705	0.0870517	0.173589	0.240958	0.497522	0.219603	0.154349	0.48845	0.775261	0.108841	0.0837003	0.642583	0.416706	0.0758374	0.181708	0.101063	0.583038
ENSG00000101052	IFT52	intraflagellar transport 52 [Source:HGNC Symbol;Acc:HGNC:15901]	51098	-0.0690837	0.567534	0.466563	0.0885176	-0.0142941	0.904914	0.467257	0.0516466	-0.119971	0.398246	0.497335	0.136099	-0.155088	0.307619	0.533811	0.17721	-0.0433289	0.878532	0.856471	0.0527524	0.195453	0.387721	0.315619	0.143205	0.181674	0.127678	0.583038
ENSG00000090097	PCBP4	poly(rC) binding protein 4 [Source:HGNC Symbol;Acc:HGNC:8652]	57060	-5.23156e-05	0.999654	0.597446	0.05	0.183034	0.122471	0.148403	0.344709	-0.0824793	0.564801	0.558614	0.0891818	0.0771177	0.615577	0.659617	0.0796544	0.220141	0.437441	0.760107	0.1246	0.337271	0.130866	0.178245	0.352081	0.174956	0.0150649	0.583038
ENSG00000180353	HCLS1	hematopoietic cell-specific Lyn substrate 1 [Source:HGNC Symbol;Acc:HGNC:4844]	3059	0.225923	0.0552677	0.148808	0.493181	0.345648	0.00262116	0.0218052	0.872209	0.193488	0.160213	0.354187	0.295235	0.221578	0.133032	0.417587	0.330754	0.198869	0.509593	0.78485	0.103135	0.567056	0.0112918	0.0662563	0.803139	0.181528	0.0780603	0.583038
ENSG00000130755	GMFG	glia maturation factor gamma [Source:HGNC Symbol;Acc:HGNC:4374]	9535	0.0821988	0.488625	0.434498	0.107007	0.0823307	0.48324	0.326021	0.10847	0.0688965	0.62038	0.577861	0.0788417	-0.0614034	0.680497	0.681867	0.0698324	-0.298759	0.281532	0.686715	0.198329	0.243492	0.276273	0.260463	0.201799	0.181317	0.0868804	0.583038
ENSG00000162148	PPP1R32	protein phosphatase 1 regulatory subunit 32 [Source:HGNC Symbol;Acc:HGNC:28869]	220004	-0.251388	0.02904	0.105017	0.602361	-0.0922809	0.423355	0.300218	0.126813	-0.386658	0.00276328	0.0952694	0.875006	-0.184456	0.194909	0.462472	0.258356	0.130366	0.672345	0.821537	0.071388	0.076711	0.757909	0.453942	0.0612723	0.18131	0.225548	0.590134
ENSG00000182287	AP1S2	adaptor related protein complex 1 subunit sigma 2 [Source:HGNC Symbol;Acc:HGNC:560]	8905	-0.160351	0.173563	0.264473	0.27878	-0.0198521	0.865467	0.456386	0.0533156	-0.157907	0.245931	0.415788	0.215953	-0.159001	0.275937	0.515918	0.195722	-0.418564	0.147595	0.586841	0.326729	0.312334	0.182223	0.211093	0.283081	0.181173	0.103275	0.583038
ENSG00000204356	NELFE	negative elongation factor complex member E [Source:HGNC Symbol;Acc:HGNC:13974]	7936	-0.0972163	0.416959	0.403216	0.129021	0.0276318	0.815918	0.441244	0.0562722	-0.224872	0.108745	0.304629	0.369487	-0.110294	0.466407	0.603891	0.113428	0.209512	0.400719	0.74727	0.137988	0.162318	0.419855	0.329763	0.130775	0.173684	0.0158296	0.583038
ENSG00000003147	ICA1	islet cell autoantigen 1 [Source:HGNC Symbol;Acc:HGNC:5343]	3382	-0.026376	0.826023	0.552419	0.0555892	-0.0249327	0.833658	0.446262	0.0551007	-0.1259	0.377472	0.488374	0.14425	-0.156051	0.306896	0.533811	0.177604	0.00524183	0.984234	0.869085	0.0500459	0.198741	0.346772	0.297015	0.161552	0.181011	0.118745	0.583038
ENSG00000143669	LYST	lysosomal trafficking regulator [Source:HGNC Symbol;Acc:HGNC:1968]	1130	-0.0683954	0.565318	0.465775	0.0889687	0.0906557	0.440784	0.307895	0.121054	-0.240079	0.0831895	0.277759	0.420697	-0.0751837	0.616392	0.659617	0.0795154	0.310246	0.301871	0.697644	0.185686	0.292766	0.224308	0.235153	0.241488	0.172789	0.0413838	0.583038
ENSG00000142156	COL6A1	collagen type VI alpha 1 chain [Source:HGNC Symbol;Acc:HGNC:2211]	1291	-0.046792	0.697916	0.512412	0.067555	0.1256	0.291	0.242159	0.186001	-0.113755	0.423681	0.506738	0.126961	0.0655141	0.667785	0.677819	0.0715663	0.154274	0.616487	0.811348	0.0801844	0.312078	0.200055	0.221176	0.264181	0.180842	0.171162	0.583038
ENSG00000090520	DNAJB11	DnaJ heat shock protein family (Hsp40) member B11 [Source:HGNC Symbol;Acc:HGNC:14889]	51726	-0.0901188	0.456193	0.421388	0.116261	0.154649	0.194779	0.193163	0.257361	-0.224478	0.108276	0.303929	0.370318	-0.0158183	0.916718	0.740827	0.0512641	0.421411	0.128114	0.566424	0.356582	0.568999	0.00626419	0.0559459	0.86927	0.180815	0.223258	0.589863
ENSG00000062485	CS	citrate synthase [Source:HGNC Symbol;Acc:HGNC:2422]	1431	0.116122	0.329724	0.361277	0.165271	0.225734	0.0535905	0.0946656	0.498696	-0.054701	0.700704	0.604144	0.0672532	0.152246	0.316597	0.53815	0.172418	0.491341	0.0453705	0.46798	0.573342	0.257093	0.209421	0.226408	0.255041	0.17273	0.00728581	0.583038
ENSG00000149218	ENDOD1	endonuclease domain containing 1 [Source:HGNC Symbol;Acc:HGNC:29129]	23052	0.0595386	0.619342	0.486151	0.0789418	0.00275888	0.98145	0.486185	0.0500623	-0.0130183	0.927118	0.667512	0.050967	-0.062996	0.679408	0.681726	0.0699775	0.0398697	0.892416	0.859064	0.0521544	-0.0670711	0.777651	0.459961	0.0594475	0.172332	0.0183038	0.583038
ENSG00000086189	DIMT1	DIM1 rRNA methyltransferase and ribosome maturation factor [Source:HGNC Symbol;Acc:HGNC:30217]	27292	-0.0512052	0.670384	0.503291	0.0711531	-0.0364943	0.759198	0.423966	0.0609061	-0.114637	0.41575	0.504476	0.129717	-0.133883	0.374932	0.566316	0.145293	-0.183617	0.514175	0.786448	0.101955	0.0958566	0.673902	0.427241	0.0711694	0.172248	0.0249709	0.583038
ENSG00000157227	MMP14	matrix metallopeptidase 14 [Source:HGNC Symbol;Acc:HGNC:7160]	4323	0.181944	0.118003	0.217907	0.351779	0.411633	0.000226482	0.00939914	0.970293	0.168619	0.21682	0.396628	0.238707	0.396095	0.00559471	0.233761	0.817296	0.173748	0.569628	0.800718	0.0891454	0.497174	0.0322183	0.0941537	0.638653	0.180399	0.273611	0.603763
ENSG00000175826	CTDNEP1	CTD nuclear envelope phosphatase 1 [Source:HGNC Symbol;Acc:HGNC:19085]	23399	-0.0595612	0.619639	0.486158	0.0788919	0.149594	0.205904	0.199642	0.247157	-0.146911	0.29139	0.443722	0.186363	0.0153852	0.918228	0.741221	0.0512184	0.155433	0.523976	0.789272	0.099498	0.37622	0.0441112	0.107837	0.578886	0.180276	0.0789907	0.583038
ENSG00000158985	CDC42SE2	CDC42 small effector 2 [Source:HGNC Symbol;Acc:HGNC:18547]	56990	0.0883307	0.463335	0.423686	0.114129	0.388672	0.000775703	0.0141925	0.935979	0.00560345	0.968812	0.67709	0.0501766	0.260761	0.0859985	0.376003	0.414388	0.147046	0.63132	0.813018	0.0776606	0.604428	0.00702072	0.0574867	0.857931	0.180231	0.183832	0.583038
ENSG00000174943	KCTD13	potassium channel tetramerization domain containing 13 [Source:HGNC Symbol;Acc:HGNC:22234]	253980	0.127418	0.281857	0.334204	0.191432	0.379282	0.000871804	0.0148249	0.931382	-0.018231	0.897727	0.660474	0.0519106	0.20884	0.166411	0.443778	0.288035	0.499157	0.0574708	0.489452	0.525743	0.639497	0.000849739	0.0456351	0.978159	0.172152	0.0357997	0.583038
ENSG00000118971	CCND2	cyclin D2 [Source:HGNC Symbol;Acc:HGNC:1583]	894	-0.210554	0.0777303	0.176367	0.430676	-0.0117464	0.921453	0.47177	0.0511215	-0.32048	0.0197272	0.169029	0.666497	-0.226268	0.129048	0.415415	0.336591	0.00645265	0.982766	0.869085	0.0500549	0.360143	0.121963	0.172717	0.367023	0.180164	0.221591	0.589863
ENSG00000100170	SLC5A1	solute carrier family 5 member 1 [Source:HGNC Symbol;Acc:HGNC:11036]	6523	-0.113738	0.344704	0.368981	0.158119	0.0941481	0.429536	0.302782	0.124727	-0.175691	0.213867	0.394797	0.241217	-0.0852726	0.575279	0.646486	0.0870691	0.0165646	0.955222	0.865421	0.0503708	0.290647	0.21163	0.227723	0.252956	0.179998	0.288209	0.606689
ENSG00000119865	CNRIP1	cannabinoid receptor interacting protein 1 [Source:HGNC Symbol;Acc:HGNC:24546]	25927	-0.209087	0.0776745	0.176353	0.43081	-0.0590693	0.617242	0.37664	0.0792956	-0.197449	0.155939	0.350714	0.300376	-0.180382	0.227461	0.487726	0.229986	-0.432543	0.0820956	0.518648	0.451271	0.113057	0.587665	0.396244	0.0855105	0.179876	0.307677	0.614457
ENSG00000102710	SUPT20H	SPT20 homolog, SAGA complex component [Source:HGNC Symbol;Acc:HGNC:20596]	55578	0.301647	0.00797424	0.0545375	0.774877	0.356647	0.00137906	0.0169283	0.910461	0.288155	0.0359608	0.206558	0.5721	0.306865	0.0371923	0.307828	0.566412	0.132951	0.658301	0.819459	0.0734227	0.348829	0.138822	0.183313	0.339614	0.171947	0.0272847	0.583038
ENSG00000198551	ZNF627	zinc finger protein 627 [Source:HGNC Symbol;Acc:HGNC:30570]	199692	-0.0200439	0.865455	0.56261	0.0533163	0.207707	0.0733468	0.111126	0.441481	-0.111908	0.415167	0.50422	0.129923	0.01242	0.93292	0.745283	0.0508188	-0.123465	0.671962	0.821537	0.0714419	0.581373	0.00623949	0.0559459	0.869651	0.171425	0.0200722	0.583038
ENSG00000114270	COL7A1	collagen type VII alpha 1 chain [Source:HGNC Symbol;Acc:HGNC:2214]	1294	-0.0695393	0.565922	0.466109	0.0888454	0.226112	0.0568682	0.0975625	0.48805	-0.198163	0.160539	0.354422	0.294848	0.116787	0.44271	0.59427	0.120671	0.351848	0.223711	0.656125	0.242009	0.352697	0.125795	0.174935	0.360455	0.179818	0.4171	0.652106
ENSG00000076928	ARHGEF1	Rho guanine nucleotide exchange factor 1 [Source:HGNC Symbol;Acc:HGNC:681]	9138	0.282363	0.0166835	0.0785237	0.684493	0.351713	0.00233901	0.0208693	0.879844	0.129382	0.361232	0.481409	0.151099	0.216552	0.151991	0.432512	0.305261	0.720413	0.00909906	0.323948	0.829565	0.620517	0.00463717	0.0538128	0.895999	0.170527	0.0186115	0.583038
ENSG00000137692	DCUN1D5	defective in cullin neddylation 1 domain containing 5 [Source:HGNC Symbol;Acc:HGNC:28409]	84259	0.174376	0.127338	0.228137	0.337296	0.193684	0.0863981	0.121864	0.410863	0.00349437	0.979376	0.680025	0.0500772	0.04261	0.768584	0.708023	0.0600651	0.711882	0.0012209	0.226551	0.968261	0.494148	0.00773754	0.0595167	0.847721	0.170194	0.0130046	0.583038
ENSG00000171469	ZNF561	zinc finger protein 561 [Source:HGNC Symbol;Acc:HGNC:28684]	93134	-0.0394435	0.732546	0.524462	0.0635771	-0.0302283	0.791252	0.433563	0.0581176	-0.210628	0.128827	0.323064	0.336921	-0.123086	0.410502	0.582029	0.131586	0.267227	0.302106	0.697644	0.185547	0.124566	0.554905	0.384531	0.0922969	0.179048	0.254406	0.6004
ENSG00000090020	SLC9A1	solute carrier family 9 member A1 [Source:HGNC Symbol;Acc:HGNC:11071]	6548	-0.132322	0.271333	0.328674	0.197972	0.127741	0.283195	0.238801	0.190624	-0.159684	0.261752	0.425885	0.204923	-0.0147714	0.923198	0.742522	0.0510743	-0.0732514	0.786836	0.839347	0.0586587	0.377417	0.0707022	0.132388	0.48277	0.179029	0.221252	0.589863
ENSG00000161835	TAMALIN	trafficking regulator and scaffold protein tamalin [Source:HGNC Symbol;Acc:HGNC:18707]	160622	-0.16296	0.166537	0.258432	0.286519	0.00566286	0.961453	0.481112	0.0502693	-0.16347	0.241301	0.412681	0.219348	-0.0951456	0.526072	0.630004	0.0977196	-0.499785	0.0801319	0.518331	0.456397	0.203904	0.391587	0.317121	0.141626	0.179012	0.100939	0.583038
ENSG00000169429	CXCL8	C-X-C motif chemokine ligand 8 [Source:HGNC Symbol;Acc:HGNC:6025]	3576	-0.18491	0.116872	0.217163	0.353612	0.139575	0.232926	0.213354	0.224833	-0.160579	0.246241	0.416083	0.215729	0.0510238	0.732215	0.698326	0.0636436	-0.313923	0.28738	0.688467	0.19457	0.405797	0.0796957	0.139367	0.457552	0.178959	0.506167	0.677255
ENSG00000135480	KRT7	keratin 7 [Source:HGNC Symbol;Acc:HGNC:6445]	3855	0.0556582	0.631499	0.489482	0.0769474	0.121946	0.286938	0.240465	0.188387	0.036366	0.786853	0.630677	0.0584924	0.0917098	0.524065	0.62938	0.0981952	0.0852159	0.726933	0.828683	0.0645056	0.146263	0.45452	0.344398	0.118985	0.178908	0.264599	0.602404
ENSG00000204859	ZBTB48	zinc finger and BTB domain containing 48 [Source:HGNC Symbol;Acc:HGNC:4930]	3104	-0.0746855	0.533725	0.453019	0.0958062	-0.1202	0.310482	0.251766	0.175139	-0.251786	0.0660014	0.256632	0.464183	-0.265829	0.0702379	0.353933	0.452589	0.303873	0.305445	0.698324	0.183584	-0.124718	0.606012	0.402804	0.0820539	0.178893	0.0826333	0.583038
ENSG00000033867	SLC4A7	solute carrier family 4 member 7 [Source:HGNC Symbol;Acc:HGNC:11033]	9497	-0.00137953	0.990652	0.595181	0.0500158	0.241897	0.0354975	0.076097	0.569754	0.00274899	0.984148	0.680767	0.0500456	0.168177	0.254367	0.50391	0.209965	-0.418913	0.16121	0.600289	0.308314	0.402548	0.0909367	0.149022	0.429551	0.178885	0.0674803	0.583038
ENSG00000184205	TSPYL2	TSPY like 2 [Source:HGNC Symbol;Acc:HGNC:24358]	64061	-0.27878	0.019262	0.0839955	0.664353	0.0263941	0.825422	0.443543	0.0556287	-0.298121	0.0305783	0.194927	0.598933	-0.0640342	0.670051	0.678262	0.0712506	-0.268269	0.31425	0.704075	0.17855	0.210087	0.328856	0.288081	0.170619	0.178772	0.247896	0.598563
ENSG00000177105	RHOG	ras homolog family member G [Source:HGNC Symbol;Acc:HGNC:672]	391	0.117809	0.32361	0.357604	0.16832	0.325694	0.00491782	0.0289837	0.822537	0.0403265	0.775819	0.628597	0.0594248	0.0798461	0.598532	0.652558	0.0826575	0.219599	0.471628	0.769197	0.113711	0.682785	0.00159825	0.0489002	0.958711	0.17873	0.0803627	0.583038
ENSG00000162692	VCAM1	vascular cell adhesion molecule 1 [Source:HGNC Symbol;Acc:HGNC:12663]	7412	-0.252512	0.0281876	0.103641	0.607076	0.0450267	0.696242	0.402703	0.0677623	-0.312525	0.0220903	0.173289	0.649779	-0.0841002	0.572703	0.646054	0.0875811	-0.14292	0.583615	0.803097	0.0863056	0.343453	0.0903299	0.148625	0.430975	0.178721	0.617503	0.713244
ENSG00000167123	CERCAM	cerebral endothelial cell adhesion molecule [Source:HGNC Symbol;Acc:HGNC:23723]	51148	-0.0326559	0.783663	0.540819	0.0587372	0.140196	0.231723	0.212745	0.22576	-0.082261	0.559877	0.557821	0.0902025	0.078372	0.604352	0.654756	0.0816108	0.0214291	0.942831	0.86346	0.0506049	0.249051	0.293814	0.269893	0.190552	0.178692	0.24677	0.598563
ENSG00000153234	NR4A2	nuclear receptor subfamily 4 group A member 2 [Source:HGNC Symbol;Acc:HGNC:7981]	4929	-0.277503	0.0175716	0.0807807	0.67732	0.0514445	0.661258	0.391707	0.0724358	-0.254479	0.0630507	0.251612	0.472654	-0.00260895	0.985998	0.756304	0.0500356	-0.475325	0.0749819	0.513268	0.470421	0.282095	0.19961	0.221111	0.264629	0.178679	0.384211	0.642383
ENSG00000162976	SLC66A3	solute carrier family 66 member 3 [Source:HGNC Symbol;Acc:HGNC:28503]	130814	0.134968	0.261261	0.322678	0.204538	0.0195961	0.869501	0.457557	0.0531176	0.0590396	0.68	0.59676	0.0698986	-0.0377952	0.80547	0.716297	0.057038	0.213845	0.440211	0.76086	0.123664	0.0760201	0.735436	0.447486	0.0635718	0.178594	0.138639	0.583038
ENSG00000136141	LRCH1	leucine rich repeats and calponin homology domain containing 1 [Source:HGNC Symbol;Acc:HGNC:20309]	23143	-0.0356091	0.767559	0.536184	0.0601351	0.283084	0.0157938	0.0505888	0.691955	-0.114636	0.419786	0.506002	0.128304	0.150548	0.322234	0.540601	0.169502	0.12107	0.690945	0.824794	0.0688645	0.583119	0.00925326	0.0621292	0.827601	0.178376	0.0792139	0.583038
ENSG00000140105	WARS1	tryptophanyl-tRNA synthetase 1 [Source:HGNC Symbol;Acc:HGNC:12729]	7453	-0.210857	0.0761153	0.174447	0.434591	0.0701952	0.553755	0.352306	0.0913819	-0.266279	0.0552741	0.239664	0.496764	-0.0708248	0.63872	0.667969	0.0758699	-0.0471846	0.865453	0.85515	0.0533848	0.450244	0.0326316	0.094828	0.63631	0.178299	0.395283	0.644481
ENSG00000114127	XRN1	5'-3' exoribonuclease 1 [Source:HGNC Symbol;Acc:HGNC:30654]	54464	0.102231	0.396463	0.393889	0.136467	0.219691	0.0634473	0.102807	0.468189	0.0235445	0.868501	0.652255	0.0531728	0.141642	0.35115	0.555315	0.155579	0.232633	0.411289	0.752034	0.133937	0.334558	0.134105	0.179855	0.34691	0.178257	0.29884	0.610718
ENSG00000104312	RIPK2	receptor interacting serine/threonine kinase 2 [Source:HGNC Symbol;Acc:HGNC:10020]	8767	-0.0867842	0.471872	0.427381	0.111652	0.260955	0.026848	0.0651113	0.61471	-0.149696	0.29276	0.444631	0.185565	0.0728154	0.634135	0.666782	0.0765937	0.00228392	0.993999	0.87008	0.0500067	0.649898	0.00266714	0.0489752	0.934149	0.178246	0.364987	0.63273
ENSG00000070087	PFN2	profilin 2 [Source:HGNC Symbol;Acc:HGNC:8882]	5217	0.0954909	0.414744	0.402541	0.129798	-0.0258341	0.823821	0.443196	0.0557345	0.0438622	0.754234	0.623239	0.0614045	-0.0026228	0.986069	0.756304	0.0500352	0.116106	0.657079	0.819459	0.0736051	-0.213756	0.304917	0.276196	0.183893	0.178207	0.119676	0.583038
ENSG00000266714	MYO15B	myosin XVB [Source:HGNC Symbol;Acc:HGNC:14083]	80022	-0.239534	0.0447339	0.13319	0.530497	-0.0806457	0.498911	0.331963	0.104291	-0.357336	0.0105564	0.139156	0.749413	-0.147019	0.336546	0.547799	0.162403	-0.105574	0.718327	0.828025	0.0654873	-0.0834325	0.723758	0.444132	0.0648634	0.178176	0.284025	0.605224
ENSG00000168067	MAP4K2	mitogen-activated protein kinase kinase kinase kinase 2 [Source:HGNC Symbol;Acc:HGNC:6864]	5871	0.197188	0.101755	0.201839	0.379938	0.317492	0.00698257	0.0345308	0.788848	0.0299649	0.833122	0.643204	0.0551452	0.129356	0.394818	0.57521	0.1374	0.364682	0.221914	0.654411	0.243591	0.461075	0.0475704	0.111715	0.563954	0.178024	0.138031	0.583038
ENSG00000133812	SBF2	SET binding factor 2 [Source:HGNC Symbol;Acc:HGNC:2135]	81846	-0.0306393	0.800546	0.545476	0.0573922	0.178737	0.133907	0.156363	0.327734	-0.102364	0.47441	0.525873	0.11112	0.0557913	0.716414	0.695254	0.0653924	-0.104115	0.735617	0.830961	0.0635523	0.298196	0.221313	0.233368	0.244123	0.177963	0.0945153	0.583038
ENSG00000007312	CD79B	CD79b molecule [Source:HGNC Symbol;Acc:HGNC:1699]	974	-0.0591609	0.619163	0.486151	0.0789719	0.039735	0.735891	0.417004	0.0632237	-0.227863	0.095559	0.293262	0.394275	-0.206361	0.160265	0.440536	0.295172	0.263889	0.380987	0.738214	0.146016	0.454078	0.0510941	0.114795	0.549642	0.17796	0.150642	0.583038
ENSG00000051128	HOMER3	homer scaffold protein 3 [Source:HGNC Symbol;Acc:HGNC:17514]	9454	0.0814348	0.482878	0.432876	0.108569	0.211587	0.0631409	0.102688	0.469073	0.0113409	0.932788	0.669057	0.050822	0.0742483	0.606054	0.655373	0.0813089	0.243864	0.325328	0.711398	0.172488	0.533728	0.00295564	0.050546	0.928055	0.17768	0.094242	0.583038
ENSG00000111752	PHC1	polyhomeotic homolog 1 [Source:HGNC Symbol;Acc:HGNC:3182]	1911	0.00223744	0.984543	0.594273	0.0500433	0.213604	0.058978	0.0992781	0.481473	-0.0595361	0.656642	0.590405	0.0731592	0.143551	0.315736	0.537505	0.172869	0.113926	0.690565	0.824794	0.068914	0.523771	0.0137366	0.0693459	0.776907	0.169756	0.018038	0.583038
ENSG00000094975	SUCO	SUN domain containing ossification factor [Source:HGNC Symbol;Acc:HGNC:1240]	51430	-0.0854051	0.474476	0.428145	0.110911	0.253728	0.0297578	0.0690404	0.598473	-0.126847	0.364951	0.483439	0.149492	0.160611	0.283854	0.520673	0.190845	-0.00653606	0.981567	0.868983	0.0500628	0.507823	0.0157635	0.0721332	0.757207	0.177429	0.128175	0.583038
ENSG00000087302	RTRAF	RNA transcription, translation and transport factor [Source:HGNC Symbol;Acc:HGNC:23169]	51637	-0.140873	0.239579	0.308608	0.219806	0.0235161	0.843295	0.449615	0.0545176	-0.268609	0.0487825	0.229506	0.519232	-0.119821	0.417835	0.583649	0.128985	0.232959	0.357789	0.732459	0.156309	0.265449	0.18826	0.214406	0.276448	0.169381	0.0185939	0.583038
ENSG00000164111	ANXA5	annexin A5 [Source:HGNC Symbol;Acc:HGNC:543]	308	0.0424315	0.717697	0.519568	0.0652105	0.236902	0.0390056	0.0797366	0.553966	0.0177382	0.896914	0.66028	0.0519414	0.163089	0.26411	0.510852	0.20335	-0.0986189	0.708874	0.827153	0.0666089	0.410753	0.0413001	0.104635	0.591742	0.177173	0.0776193	0.583038
ENSG00000134291	TMEM106C	transmembrane protein 106C [Source:HGNC Symbol;Acc:HGNC:28775]	79022	0.089751	0.458325	0.421823	0.115618	0.0167271	0.88906	0.462962	0.0522462	0.0297908	0.834587	0.643204	0.0550537	-0.0881573	0.563779	0.643227	0.0893921	0.0985103	0.735737	0.830961	0.0635394	0.258051	0.265253	0.254737	0.209364	0.177149	0.0524314	0.583038
ENSG00000178498	DTX3	deltex E3 ubiquitin ligase 3 [Source:HGNC Symbol;Acc:HGNC:24457]	196403	-0.218331	0.0689159	0.165451	0.453011	-0.0214759	0.857792	0.453953	0.0537099	-0.291292	0.0385784	0.212593	0.560186	-0.148405	0.331537	0.544835	0.164839	-0.0878061	0.767658	0.836354	0.0603488	0.250064	0.289676	0.267658	0.193122	0.177118	0.170999	0.583038
ENSG00000173295	FAM86B3P	family with sequence similarity 86 member B3, pseudogene [Source:HGNC Symbol;Acc:HGNC:44371]	286042	0.0461383	0.693499	0.511534	0.0681054	0.0167651	0.884953	0.462109	0.0524171	-0.0649861	0.608144	0.573237	0.0809408	-0.0773261	0.569088	0.645134	0.0883078	0.324696	0.263535	0.679814	0.210581	0.115869	0.625783	0.410508	0.0785861	0.17711	0.174304	0.583038
ENSG00000129465	RIPK3	receptor interacting serine/threonine kinase 3 [Source:HGNC Symbol;Acc:HGNC:10021]	11035	-0.0431824	0.689254	0.510268	0.068644	0.114164	0.283935	0.239113	0.190178	-0.0738801	0.557929	0.557295	0.0906115	0.217658	0.1042	0.391367	0.377684	-0.203551	0.451213	0.762684	0.120044	-0.123477	0.572277	0.390351	0.0885964	0.177039	0.0695702	0.583038
ENSG00000105556	MIER2	MIER family member 2 [Source:HGNC Symbol;Acc:HGNC:29210]	54531	0.0296259	0.802085	0.545776	0.0572757	0.260433	0.0238878	0.061629	0.632661	-0.0605108	0.668561	0.594278	0.0714578	0.129268	0.392451	0.574238	0.138308	0.160468	0.555636	0.798471	0.0921366	0.347354	0.102103	0.158622	0.404875	0.176654	0.102893	0.583038
ENSG00000150961	SEC24D	SEC24 homolog D, COPII coat complex component [Source:HGNC Symbol;Acc:HGNC:10706]	9871	-0.0798692	0.505639	0.441138	0.102568	0.212176	0.0716211	0.109896	0.445895	-0.116972	0.405887	0.50089	0.133261	0.132368	0.380008	0.567845	0.14322	-0.103186	0.725775	0.828683	0.0646356	0.386095	0.0907064	0.148884	0.430091	0.176611	0.15264	0.583038
ENSG00000104320	NBN	nibrin [Source:HGNC Symbol;Acc:HGNC:7652]	4683	-0.0642366	0.589309	0.475352	0.0842715	0.225507	0.0530823	0.0942945	0.500396	-0.131828	0.346709	0.476709	0.157611	0.0905564	0.547213	0.63739	0.0929123	-0.0769088	0.798527	0.842001	0.0577088	0.486884	0.0328437	0.0950136	0.635116	0.176589	0.388946	0.642438
ENSG00000166313	APBB1	amyloid beta precursor protein binding family B member 1 [Source:HGNC Symbol;Acc:HGNC:581]	322	-0.158113	0.182879	0.271669	0.269034	0.113305	0.335822	0.263375	0.162306	-0.263537	0.0555712	0.23987	0.49579	-0.0776477	0.603373	0.654494	0.0817853	0.0634883	0.825661	0.846757	0.0557313	0.447007	0.0416268	0.104787	0.590212	0.176541	0.0724542	0.583038
ENSG00000167778	SPRYD3	SPRY domain containing 3 [Source:HGNC Symbol;Acc:HGNC:25920]	84926	0.0817657	0.496107	0.436791	0.105022	0.187005	0.113537	0.142394	0.35912	-0.0248722	0.858545	0.649691	0.0536779	-0.00726027	0.961287	0.752672	0.0502722	0.354592	0.208107	0.645574	0.256293	0.558633	0.00804898	0.0598796	0.843432	0.176482	0.0662969	0.583038
ENSG00000178726	THBD	thrombomodulin [Source:HGNC Symbol;Acc:HGNC:11784]	7056	-0.207617	0.080853	0.179742	0.423314	-0.118184	0.317953	0.255459	0.171212	-0.220438	0.116823	0.312078	0.355717	-0.247421	0.100186	0.388636	0.385219	-0.261116	0.344644	0.725264	0.162593	0.0566875	0.801498	0.467695	0.0574769	0.176431	0.372746	0.635941
ENSG00000176435	CLEC14A	C-type lectin domain containing 14A [Source:HGNC Symbol;Acc:HGNC:19832]	161198	-0.152419	0.206777	0.287777	0.246383	-0.166769	0.162227	0.174565	0.291445	-0.168228	0.238122	0.410028	0.221725	-0.209023	0.170617	0.44692	0.283315	-0.141198	0.618869	0.811348	0.0797694	-0.127537	0.577067	0.39206	0.087617	0.176429	0.276969	0.604478
ENSG00000180448	ARHGAP45	Rho GTPase activating protein 45 [Source:HGNC Symbol;Acc:HGNC:17102]	23526	0.0501548	0.675038	0.504942	0.0705166	0.216265	0.0651972	0.104215	0.46321	-0.0681384	0.628257	0.581544	0.0775402	-0.0456384	0.762321	0.706155	0.0606383	0.221734	0.464221	0.766939	0.115953	0.536608	0.0185166	0.0762951	0.732843	0.176361	0.243596	0.597811
ENSG00000102393	GLA	galactosidase alpha [Source:HGNC Symbol;Acc:HGNC:4296]	2717	0.115836	0.320322	0.355936	0.169992	0.100378	0.384365	0.284758	0.141143	0.107158	0.418168	0.505348	0.128868	0.125128	0.377493	0.566668	0.144242	0.00651543	0.979956	0.868963	0.0500742	-0.0670866	0.748014	0.451682	0.0622551	0.176232	0.268218	0.602964
ENSG00000075790	BCAP29	B cell receptor associated protein 29 [Source:HGNC Symbol;Acc:HGNC:24131]	55973	0.113946	0.33042	0.361754	0.164929	0.14149	0.221163	0.20778	0.234155	0.134253	0.324663	0.462993	0.168267	0.0526232	0.71954	0.695576	0.0650368	-0.351274	0.218001	0.652634	0.24709	0.325038	0.154553	0.193385	0.317093	0.169154	0.0152811	0.583038
ENSG00000023902	PLEKHO1	pleckstrin homology domain containing O1 [Source:HGNC Symbol;Acc:HGNC:24310]	51177	0.0445617	0.711691	0.517682	0.0659017	0.253045	0.0316966	0.0715851	0.588323	0.0031986	0.981809	0.680387	0.05006	0.0831992	0.579555	0.647729	0.0862295	0.0423358	0.884728	0.857747	0.0524762	0.553948	0.00990517	0.0632209	0.819483	0.176125	0.173667	0.583038
ENSG00000131238	PPT1	palmitoyl-protein thioesterase 1 [Source:HGNC Symbol;Acc:HGNC:9325]	5538	0.287525	0.0150152	0.0747971	0.698732	0.0627348	0.597552	0.3695	0.0827497	0.258629	0.0657745	0.256482	0.464822	-0.0125155	0.934631	0.74576	0.0507774	0.223663	0.409633	0.752034	0.134561	0.0404423	0.85466	0.481861	0.0539578	0.175988	0.0827112	0.583038
ENSG00000141424	SLC39A6	solute carrier family 39 member 6 [Source:HGNC Symbol;Acc:HGNC:18607]	25800	-0.0246869	0.833034	0.5542	0.0551398	0.350014	0.00191341	0.0194238	0.892382	-0.108467	0.430368	0.508855	0.1247	0.217963	0.136867	0.420297	0.325305	0.140727	0.622136	0.811882	0.0792065	0.673322	0.00064758	0.0421573	0.983748	0.16901	0.0456631	0.583038
ENSG00000143322	ABL2	ABL proto-oncogene 2, non-receptor tyrosine kinase [Source:HGNC Symbol;Acc:HGNC:77]	27	-0.185069	0.122465	0.223266	0.344718	0.0904946	0.447565	0.310606	0.118911	-0.272919	0.0482061	0.228838	0.521346	-0.0593189	0.692852	0.685929	0.0682301	-0.00848625	0.976068	0.868597	0.0501058	0.349565	0.11228	0.165873	0.384623	0.175888	0.180558	0.583038
ENSG00000138031	ADCY3	adenylate cyclase 3 [Source:HGNC Symbol;Acc:HGNC:234]	109	-0.101602	0.395177	0.393263	0.136954	0.0414812	0.726126	0.413828	0.0642703	-0.11025	0.422285	0.506443	0.12744	-0.0447063	0.761901	0.706155	0.0606773	-0.201966	0.479892	0.772517	0.111281	0.149999	0.515744	0.36935	0.101556	0.175883	0.191823	0.583089
ENSG00000212747	RTL8B	retrotransposon Gag like 8B [Source:HGNC Symbol;Acc:HGNC:33156]	441518	-0.173304	0.147576	0.24264	0.309304	0.155713	0.188916	0.189823	0.263008	-0.177719	0.204879	0.389313	0.249114	0.100803	0.50413	0.622243	0.103109	-0.36166	0.216463	0.652023	0.248487	0.224806	0.345104	0.296291	0.162367	0.175852	0.0777801	0.583038
ENSG00000083457	ITGAE	integrin subunit alpha E [Source:HGNC Symbol;Acc:HGNC:6147]	3682	0.276856	0.016039	0.0771537	0.689869	0.162087	0.158594	0.17232	0.295708	0.181742	0.188251	0.37627	0.264834	-0.0349157	0.814702	0.7175	0.056371	0.490408	0.0723145	0.509348	0.478039	0.483851	0.0240916	0.0835603	0.690015	0.17571	0.0917022	0.583038
ENSG00000145868	FBXO38	F-box protein 38 [Source:HGNC Symbol;Acc:HGNC:28844]	81545	0.295662	0.010637	0.0642286	0.742193	0.200547	0.0828954	0.119447	0.418638	0.226839	0.102437	0.300386	0.380959	0.123134	0.411677	0.582492	0.131165	0.400891	0.171201	0.613235	0.295876	0.278746	0.241397	0.243158	0.22724	0.168737	0.010398	0.583038
ENSG00000005844	ITGAL	integrin subunit alpha L [Source:HGNC Symbol;Acc:HGNC:6148]	3683	0.0357168	0.766763	0.536082	0.0602071	0.161972	0.171802	0.180501	0.280687	-0.0627399	0.660261	0.591186	0.0726342	0.0409174	0.789192	0.71304	0.0583015	0.291986	0.338405	0.72048	0.1657	0.353538	0.143636	0.186548	0.332437	0.17501	0.17105	0.583038
ENSG00000102882	MAPK3	mitogen-activated protein kinase 3 [Source:HGNC Symbol;Acc:HGNC:6877]	5595	0.0591651	0.61283	0.484902	0.0800478	0.225763	0.0486319	0.0897738	0.515905	-0.0152329	0.913308	0.664084	0.0513702	0.241558	0.103714	0.391367	0.378582	0.169864	0.553232	0.798471	0.092666	0.250767	0.27189	0.258252	0.20476	0.168437	0.0424322	0.583038
ENSG00000109107	ALDOC	aldolase, fructose-bisphosphate C [Source:HGNC Symbol;Acc:HGNC:418]	230	-0.151039	0.190048	0.276247	0.261902	-0.0667242	0.559979	0.354688	0.0900706	-0.146832	0.260175	0.424809	0.205984	-0.187356	0.17916	0.450879	0.274108	-0.0593933	0.826979	0.847094	0.0556432	0.124586	0.568126	0.388937	0.0894593	0.174813	0.201005	0.584142
ENSG00000077312	SNRPA	small nuclear ribonucleoprotein polypeptide A [Source:HGNC Symbol;Acc:HGNC:11151]	6626	-0.0507147	0.669569	0.503109	0.0712659	0.0492344	0.675408	0.395906	0.0704665	-0.202676	0.146778	0.341858	0.311923	-0.0638932	0.671785	0.679162	0.0710111	0.484176	0.0607322	0.49818	0.514394	0.212676	0.324297	0.28565	0.17304	0.174603	0.0804034	0.583038
ENSG00000100814	CCNB1IP1	cyclin B1 interacting protein 1 [Source:HGNC Symbol;Acc:HGNC:19437]	57820	-0.306999	0.00775874	0.0541401	0.777815	-0.0884025	0.44673	0.310323	0.119172	-0.354141	0.00557235	0.113204	0.817674	-0.248671	0.0741545	0.359185	0.442416	-0.125473	0.6578	0.819459	0.0734974	0.163908	0.471002	0.351321	0.113898	0.174581	0.0803043	0.583038
ENSG00000117616	RSRP1	arginine and serine rich protein 1 [Source:HGNC Symbol;Acc:HGNC:25234]	57035	-0.0376779	0.755009	0.532067	0.0613043	0.123264	0.300819	0.247435	0.180411	-0.0998707	0.474703	0.525876	0.111037	-0.0748277	0.617597	0.659968	0.0793108	-0.0209649	0.941891	0.863275	0.050625	0.294846	0.192864	0.217019	0.271554	0.174521	0.0987512	0.583038
ENSG00000133789	SWAP70	switching B cell complex subunit SWAP70 [Source:HGNC Symbol;Acc:HGNC:17070]	23075	-0.0605213	0.612198	0.484605	0.0801568	0.199167	0.0893615	0.124132	0.404511	-0.0270121	0.844954	0.645417	0.0544304	0.0940661	0.524557	0.629535	0.0980783	-0.417913	0.144367	0.584874	0.331371	0.401822	0.0776538	0.137366	0.463037	0.174302	0.146611	0.583038
ENSG00000173267	SNCG	synuclein gamma [Source:HGNC Symbol;Acc:HGNC:11141]	6623	0.025214	0.832439	0.5542	0.0551771	-0.0156128	0.89466	0.464347	0.0520236	-0.0334998	0.812571	0.637555	0.0565218	-0.0866146	0.566896	0.64389	0.0887529	0.203909	0.498265	0.781303	0.106137	0.0762259	0.754807	0.453341	0.0615755	0.17419	0.160406	0.583038
ENSG00000006634	DBF4	DBF4 zinc finger [Source:HGNC Symbol;Acc:HGNC:17364]	10926	0.00622392	0.958881	0.587969	0.0503065	0.192109	0.105126	0.136308	0.373751	-0.0824599	0.565043	0.558625	0.0891321	0.107847	0.482312	0.609476	0.108906	0.169027	0.510905	0.785149	0.102795	0.18529	0.368942	0.307738	0.151239	0.167126	0.0106315	0.583038
ENSG00000175745	NR2F1	nuclear receptor subfamily 2 group F member 1 [Source:HGNC Symbol;Acc:HGNC:7975]	7025	-0.0704578	0.556064	0.461557	0.090892	0.128869	0.275302	0.23504	0.195468	-0.0577509	0.681145	0.597087	0.0697463	0.115573	0.442177	0.594244	0.120841	-0.703154	0.00983449	0.334738	0.820349	-0.000847231	0.997194	0.519254	0.0500015	0.174079	0.121059	0.583038
ENSG00000186625	KATNA1	katanin catalytic subunit A1 [Source:HGNC Symbol;Acc:HGNC:6216]	11104	0.18255	0.126627	0.22721	0.338361	0.161015	0.173831	0.181642	0.278492	0.0415682	0.768362	0.627004	0.0600851	-0.0566552	0.707936	0.692489	0.0663812	0.608577	0.0227121	0.391324	0.699925	0.603322	0.00337695	0.0513025	0.919502	0.16708	0.0268188	0.583038
ENSG00000237489	C10orf143	chromosome 10 open reading frame 143 [Source:HGNC Symbol;Acc:HGNC:48677]	387723	0.0221626	0.852078	0.559724	0.0540183	-0.0361638	0.758389	0.423727	0.0609824	-0.171572	0.21129	0.393475	0.243441	-0.341145	0.0185526	0.274297	0.67535	0.531955	0.0670129	0.502929	0.493976	0.427377	0.0681518	0.129823	0.490458	0.173572	0.0933795	0.583038
ENSG00000234741	GAS5	growth arrest specific 5 [Source:HGNC Symbol;Acc:HGNC:16355]	60674	-0.206973	0.0811699	0.180227	0.422581	0.0604005	0.609776	0.373939	0.0805759	-0.245361	0.0788904	0.27147	0.430747	-0.0804864	0.594638	0.651265	0.0833705	-0.266721	0.365021	0.732832	0.152995	0.227841	0.33659	0.291846	0.16662	0.173498	0.255933	0.600847
ENSG00000145817	YIPF5	Yip1 domain family member 5 [Source:HGNC Symbol;Acc:HGNC:24877]	81555	0.00222889	0.98454	0.594273	0.0500433	0.366	0.000911001	0.0149434	0.929578	-0.00312894	0.981278	0.680349	0.0500636	0.257343	0.068174	0.351763	0.458157	-0.081974	0.789242	0.840339	0.0584583	0.656453	0.00269877	0.0489752	0.933471	0.173406	0.13355	0.583038
ENSG00000115207	GTF3C2	general transcription factor IIIC subunit 2 [Source:HGNC Symbol;Acc:HGNC:4665]	2976	0.22371	0.0480734	0.138091	0.517934	0.208169	0.0633391	0.102751	0.468501	0.174969	0.194928	0.38168	0.258338	0.165041	0.25465	0.503986	0.209769	0.201634	0.465519	0.767123	0.115556	0.136332	0.541546	0.378876	0.0953074	0.173376	0.0578061	0.583038
ENSG00000213221	DNLZ	DNL-type zinc finger [Source:HGNC Symbol;Acc:HGNC:33879]	728489	-0.125626	0.280624	0.333477	0.192182	-0.0726342	0.529244	0.344197	0.09684	-0.234255	0.0894847	0.286923	0.40682	-0.251998	0.0882589	0.378397	0.409449	0.160958	0.534387	0.792267	0.0969825	0.166525	0.423713	0.331475	0.129385	0.173367	0.0885812	0.583038
ENSG00000127616	SMARCA4	SWI/SNF related, matrix associated, actin dependent regulator of chromatin, subfamily a, member 4 [Source:HGNC Symbol;Acc:HGNC:11100]	6597	0.100818	0.3913	0.390859	0.138436	0.134636	0.246401	0.220535	0.214825	-0.0266472	0.847028	0.646203	0.0543109	0.0393899	0.79015	0.71327	0.0582241	0.582621	0.00794971	0.320823	0.84479	0.229631	0.229757	0.23798	0.236801	0.173359	0.0822897	0.583038
ENSG00000136104	RNASEH2B	ribonuclease H2 subunit B [Source:HGNC Symbol;Acc:HGNC:25671]	79621	-0.0271047	0.82285	0.55174	0.0557992	-0.138219	0.246791	0.220704	0.214545	-0.0676454	0.637435	0.584469	0.0760715	-0.345163	0.0222013	0.2859	0.649027	-0.0856321	0.762895	0.835886	0.0607946	0.122175	0.592493	0.39814	0.0845777	0.173341	0.12344	0.583038
ENSG00000111729	CLEC4A	C-type lectin domain family 4 member A [Source:HGNC Symbol;Acc:HGNC:13257]	50856	0.24737	0.0340001	0.114152	0.576873	0.0489229	0.675447	0.395906	0.0704612	0.240838	0.0844961	0.279966	0.417738	-0.0476022	0.752987	0.704574	0.0615253	0.15789	0.564261	0.798922	0.0902746	0.097371	0.659933	0.422365	0.0731804	0.173258	0.247971	0.598563
ENSG00000164244	PRRC1	proline rich coiled-coil 1 [Source:HGNC Symbol;Acc:HGNC:28164]	133619	-0.0206608	0.862694	0.562362	0.0534554	0.255048	0.0287437	0.0675824	0.603988	-0.10387	0.456205	0.519331	0.116469	0.187396	0.207933	0.473001	0.246386	0.226024	0.456244	0.765058	0.118438	0.424882	0.071234	0.132842	0.481199	0.173247	0.0980192	0.583038
ENSG00000186340	THBS2	thrombospondin 2 [Source:HGNC Symbol;Acc:HGNC:11786]	7058	-0.122482	0.293205	0.340883	0.184724	0.219632	0.0549823	0.0960384	0.494109	-0.106007	0.450947	0.516418	0.118082	0.242734	0.104514	0.391455	0.377108	-0.152119	0.529947	0.790046	0.0980434	0.400325	0.0293885	0.090964	0.655335	0.173208	0.478576	0.668535
ENSG00000132842	AP3B1	adaptor related protein complex 3 subunit beta 1 [Source:HGNC Symbol;Acc:HGNC:566]	8546	-0.0551712	0.644529	0.493573	0.0749087	0.131832	0.263739	0.230026	0.202893	-0.109007	0.436006	0.511014	0.122836	-0.0205844	0.891075	0.73615	0.0521693	0.0376971	0.895041	0.859064	0.0520498	0.468485	0.0298958	0.09125	0.652259	0.173112	0.0676622	0.583038
ENSG00000197601	FAR1	fatty acyl-CoA reductase 1 [Source:HGNC Symbol;Acc:HGNC:26222]	84188	-0.075295	0.526983	0.450168	0.0973681	0.153303	0.191311	0.191266	0.260677	-0.0712618	0.608078	0.573237	0.0809524	0.058647	0.693849	0.686526	0.0681043	-0.308375	0.263399	0.679814	0.210678	0.345628	0.113646	0.166854	0.382048	0.172999	0.0921946	0.583038
ENSG00000187514	PTMA	prothymosin alpha [Source:HGNC Symbol;Acc:HGNC:9623]	5757	-0.0687805	0.564452	0.465529	0.089146	0.12041	0.30692	0.250211	0.177057	-0.223155	0.104797	0.30106	0.376588	-0.0601922	0.685903	0.683375	0.0691214	0.199587	0.483445	0.773563	0.110259	0.35134	0.115674	0.168458	0.378283	0.166876	0.0159023	0.583038
ENSG00000153250	RBMS1	RNA binding motif single stranded interacting protein 1 [Source:HGNC Symbol;Acc:HGNC:9907]	5937	-0.082889	0.488405	0.434498	0.107067	0.111092	0.347392	0.268472	0.156882	-0.0958793	0.496193	0.531559	0.105166	0.0103595	0.945399	0.748896	0.0505419	-0.286738	0.305924	0.698616	0.183306	0.269893	0.229484	0.237971	0.237032	0.165766	0.0420053	0.583038
ENSG00000052749	RRP12	ribosomal RNA processing 12 homolog [Source:HGNC Symbol;Acc:HGNC:29100]	23223	-0.108247	0.363584	0.378309	0.149705	-0.101823	0.387781	0.286189	0.1398	-0.212169	0.133361	0.327593	0.330281	-0.173607	0.253509	0.50391	0.210564	0.246713	0.305051	0.698324	0.183815	-0.125261	0.522266	0.372019	0.0999202	0.172646	0.201152	0.584142
ENSG00000165704	HPRT1	hypoxanthine phosphoribosyltransferase 1 [Source:HGNC Symbol;Acc:HGNC:5157]	3251	-0.204013	0.0803733	0.178958	0.424428	-0.195919	0.0898149	0.124492	0.403556	-0.234163	0.0946561	0.29233	0.396091	-0.270527	0.0710972	0.353933	0.450314	-0.542689	0.0399779	0.445959	0.598033	-0.477198	0.023318	0.0829188	0.695523	0.165731	0.00393976	0.583038
ENSG00000120057	SFRP5	secreted frizzled related protein 5 [Source:HGNC Symbol;Acc:HGNC:10779]	6425	-0.157226	0.192221	0.277683	0.259801	-0.0563487	0.638053	0.383829	0.0759093	-0.225324	0.112095	0.308503	0.363657	-0.119857	0.433692	0.591599	0.123596	0.143388	0.61061	0.810279	0.0812242	0.13483	0.552154	0.383275	0.0929051	0.172271	0.290447	0.606689
ENSG00000196646	ZNF136	zinc finger protein 136 [Source:HGNC Symbol;Acc:HGNC:12920]	7695	-0.0631225	0.597241	0.478404	0.0828063	0.198534	0.0906414	0.12504	0.401828	-0.0602058	0.667951	0.594027	0.0715429	0.0618205	0.681095	0.681926	0.069753	-0.375881	0.193698	0.631112	0.270683	0.358951	0.119963	0.171442	0.370537	0.165602	0.0494616	0.583038
ENSG00000265808	SEC22B	SEC22 homolog B, vesicle trafficking protein [Source:HGNC Symbol;Acc:HGNC:10700]	9554	-0.16317	0.167415	0.259317	0.285533	0.197458	0.0904117	0.124845	0.402307	-0.22663	0.103723	0.300593	0.378566	0.0910858	0.545241	0.636954	0.0933457	-0.11129	0.713544	0.827824	0.0660491	0.428046	0.0669134	0.129369	0.494286	0.165162	0.0336109	0.583038
ENSG00000166770	ZNF667-AS1	ZNF667 antisense RNA 1 (head to head) [Source:HGNC Symbol;Acc:HGNC:44321]	100128252	-0.0583158	0.630586	0.489315	0.077094	0.0464671	0.698586	0.403453	0.0674722	-0.0685589	0.631291	0.582653	0.077049	-0.0389244	0.799436	0.714734	0.0574933	-0.1251	0.600485	0.807537	0.0830704	0.156672	0.413418	0.327522	0.133142	0.172007	0.162185	0.583038
ENSG00000164118	CEP44	centrosomal protein 44 [Source:HGNC Symbol;Acc:HGNC:29356]	80817	-0.00283788	0.980954	0.594058	0.0500657	0.154216	0.187611	0.189021	0.264293	-0.0785538	0.578797	0.563244	0.0863774	0.0880446	0.561481	0.643227	0.0898681	-0.222726	0.383486	0.739079	0.144965	0.210456	0.305184	0.276234	0.183737	0.164735	0.0087111	0.583038
ENSG00000139624	CERS5	ceramide synthase 5 [Source:HGNC Symbol;Acc:HGNC:23749]	91012	0.0869433	0.468713	0.426111	0.112559	0.250344	0.0329397	0.0730495	0.582066	0.0119769	0.933023	0.669106	0.0508163	0.124408	0.414145	0.583649	0.130285	0.308348	0.278796	0.686603	0.200123	0.550093	0.00973367	0.0627068	0.82159	0.171917	0.139378	0.583038
ENSG00000105825	TFPI2	tissue factor pathway inhibitor 2 [Source:HGNC Symbol;Acc:HGNC:11761]	7980	-0.195863	0.0865889	0.186082	0.410448	0.134051	0.237861	0.215746	0.221088	-0.123766	0.350644	0.478926	0.155809	0.0796705	0.575879	0.646598	0.0869505	-0.494989	0.0868011	0.524394	0.439447	0.321961	0.173682	0.205874	0.292915	0.171857	0.365021	0.63273
ENSG00000240771	ARHGEF25	Rho guanine nucleotide exchange factor 25 [Source:HGNC Symbol;Acc:HGNC:30275]	115557	-0.195582	0.098844	0.19906	0.385442	-0.0788801	0.503802	0.333597	0.103035	-0.230609	0.0920711	0.290356	0.401382	-0.162501	0.270983	0.513482	0.198865	-0.110122	0.70943	0.827153	0.0665417	0.074433	0.754946	0.453341	0.0615618	0.171779	0.21712	0.589699
ENSG00000198380	GFPT1	glutamine--fructose-6-phosphate transaminase 1 [Source:HGNC Symbol;Acc:HGNC:4241]	2673	-0.131503	0.27234	0.329151	0.197332	0.141107	0.233552	0.213618	0.224352	-0.167637	0.22937	0.404549	0.228473	0.0485572	0.746536	0.702524	0.0621616	-0.0080526	0.977571	0.86889	0.0500929	0.407484	0.0640947	0.127076	0.503241	0.171698	0.231378	0.59418
ENSG00000078246	TULP3	TUB like protein 3 [Source:HGNC Symbol;Acc:HGNC:12425]	7289	-0.106565	0.376897	0.384539	0.14414	0.222027	0.0607581	0.100596	0.47608	-0.139571	0.323477	0.462046	0.168868	0.164302	0.277765	0.51767	0.19458	-0.0511358	0.864603	0.85515	0.0534282	0.393621	0.0901938	0.14856	0.431296	0.171662	0.191266	0.583038
ENSG00000105552	BCAT2	branched chain amino acid transaminase 2 [Source:HGNC Symbol;Acc:HGNC:977]	587	0.11189	0.353769	0.373249	0.153999	0.16112	0.17593	0.182937	0.27625	0.00506052	0.971691	0.677745	0.0501455	-0.161934	0.287241	0.522132	0.188812	0.19538	0.514341	0.786448	0.101913	0.332775	0.159135	0.196825	0.311006	0.171612	0.337181	0.625014
ENSG00000249751	ECSCR	endothelial cell surface expressed chemotaxis and apoptosis regulator [Source:HGNC Symbol;Acc:HGNC:35454]	641700	0.297153	0.0119171	0.067206	0.728395	0.126181	0.287483	0.240732	0.188064	0.313255	0.0252168	0.180762	0.629573	0.122325	0.422504	0.58665	0.127365	0.0833813	0.770949	0.836354	0.060047	0.0408654	0.859668	0.48335	0.0536861	0.171489	0.199703	0.584142
ENSG00000080822	CLDND1	claudin domain containing 1 [Source:HGNC Symbol;Acc:HGNC:1322]	56650	-0.0366052	0.759016	0.53349	0.0609232	0.139605	0.235242	0.214433	0.223064	-0.0519304	0.706436	0.606528	0.0665599	-0.00516217	0.972146	0.754365	0.0501408	-0.409515	0.126874	0.565774	0.358645	0.341534	0.11352	0.166829	0.382285	0.164287	0.0329138	0.583038
ENSG00000116984	MTR	5-methyltetrahydrofolate-homocysteine methyltransferase [Source:HGNC Symbol;Acc:HGNC:7468]	4548	-0.0898659	0.452082	0.420115	0.117513	0.111602	0.344787	0.266973	0.158081	-0.180255	0.201373	0.386385	0.252304	0.0031694	0.98338	0.755907	0.0500501	-0.0168059	0.95383	0.864961	0.0503942	0.312474	0.170382	0.203263	0.296864	0.164263	0.0334321	0.583038
ENSG00000121064	SCPEP1	serine carboxypeptidase 1 [Source:HGNC Symbol;Acc:HGNC:29507]	59342	0.162908	0.175488	0.265794	0.276719	0.182201	0.125085	0.150134	0.340691	0.105704	0.45859	0.519859	0.115748	0.087011	0.569501	0.645379	0.0882241	0.378601	0.187815	0.626649	0.276929	0.319134	0.167599	0.201869	0.300264	0.171288	0.0716556	0.583038
ENSG00000197965	MPZL1	myelin protein zero like 1 [Source:HGNC Symbol;Acc:HGNC:7226]	9019	0.0629897	0.59172	0.476477	0.0838218	0.331166	0.00353835	0.0251629	0.850165	0.0205359	0.881989	0.656463	0.0525497	0.273389	0.06169	0.344334	0.476678	0.236394	0.438706	0.76069	0.124172	0.630036	0.0045874	0.0538128	0.896875	0.171198	0.136512	0.583038
ENSG00000135541	AHI1	Abelson helper integration site 1 [Source:HGNC Symbol;Acc:HGNC:21575]	54806	-0.0861202	0.454604	0.420956	0.116742	0.0325005	0.775761	0.428956	0.0594089	-0.210373	0.100715	0.298209	0.38421	-0.112251	0.417417	0.583649	0.129131	0.42659	0.148292	0.586841	0.325742	0.362577	0.126293	0.175335	0.359617	0.17117	0.185786	0.583038
ENSG00000134452	FBH1	F-box DNA helicase 1 [Source:HGNC Symbol;Acc:HGNC:13620]	84893	0.0593403	0.613569	0.484924	0.079921	0.271965	0.0175469	0.0528415	0.677516	-0.00537075	0.968632	0.677079	0.0501786	0.223512	0.123348	0.410855	0.34527	0.178478	0.548626	0.797574	0.0936936	0.421149	0.0671531	0.129572	0.49354	0.171031	0.0725411	0.583038
ENSG00000123416	TUBA1B	tubulin alpha 1b [Source:HGNC Symbol;Acc:HGNC:18809]	10376	0.026378	0.821419	0.551219	0.0558952	0.0211236	0.855037	0.45302	0.053857	-0.0291274	0.830356	0.642078	0.0553205	-0.00552907	0.969735	0.754203	0.0501663	0.0445351	0.830184	0.847433	0.0554319	-0.0863704	0.604875	0.402384	0.0822613	0.17076	0.0567241	0.583038
ENSG00000085662	AKR1B1	aldo-keto reductase family 1 member B [Source:HGNC Symbol;Acc:HGNC:381]	231	-0.0638283	0.586496	0.474345	0.0848015	0.152897	0.186043	0.188377	0.265848	-0.0196752	0.885656	0.657176	0.0523924	0.0918796	0.530335	0.631387	0.0967208	-0.31441	0.2626	0.679596	0.211248	0.277871	0.217836	0.231419	0.24724	0.170557	0.383218	0.641633
ENSG00000116199	FAM20B	FAM20B glycosaminoglycan xylosylkinase [Source:HGNC Symbol;Acc:HGNC:23017]	9917	0.0485357	0.677072	0.505721	0.0702421	0.212425	0.0629601	0.102551	0.469597	-0.0129476	0.925666	0.667204	0.0510061	0.186302	0.207591	0.472825	0.246689	0.00492269	0.987094	0.86978	0.0500308	0.240482	0.320315	0.283584	0.175195	0.163368	0.0028159	0.583038
ENSG00000143515	ATP8B2	ATPase phospholipid transporting 8B2 [Source:HGNC Symbol;Acc:HGNC:13534]	57198	-0.135889	0.245471	0.312675	0.215494	0.0964853	0.40542	0.293219	0.133142	-0.16217	0.230368	0.40495	0.227688	-0.0065593	0.964092	0.75329	0.0502341	-0.0550517	0.857288	0.853542	0.053814	0.387398	0.103424	0.159633	0.402136	0.170523	0.194467	0.584142
ENSG00000106258	CYP3A5	cytochrome P450 family 3 subfamily A member 5 [Source:HGNC Symbol;Acc:HGNC:2638]	1577	-0.178833	0.137284	0.234903	0.323006	-0.306547	0.00910726	0.0395302	0.760213	-0.233612	0.0977941	0.296102	0.389849	-0.108325	0.477533	0.608214	0.110237	-0.182175	0.534948	0.792333	0.0968495	-0.631718	0.00267587	0.0489752	0.933961	0.170279	0.501621	0.675622
ENSG00000243477	NAA80	N-alpha-acetyltransferase 80, NatH catalytic subunit [Source:HGNC Symbol;Acc:HGNC:30252]	24142	-0.100826	0.400137	0.395691	0.13509	-0.0410141	0.729818	0.415391	0.0638692	-0.161493	0.240285	0.41193	0.220103	-0.210746	0.151698	0.432256	0.305629	0.0691765	0.815593	0.844962	0.0564285	0.0753597	0.752575	0.45274	0.0617964	0.170276	0.0814984	0.583038
ENSG00000129292	PHF20L1	PHD finger protein 20 like 1 [Source:HGNC Symbol;Acc:HGNC:24280]	51105	0.00271796	0.981876	0.594174	0.0500595	0.231769	0.0477316	0.0891039	0.519186	-0.0285251	0.838656	0.644418	0.0548039	0.126663	0.397663	0.577181	0.136319	-0.221461	0.459771	0.765243	0.11733	0.482042	0.0351184	0.0978696	0.622667	0.170214	0.0584612	0.583038
ENSG00000143995	MEIS1	Meis homeobox 1 [Source:HGNC Symbol;Acc:HGNC:7000]	4211	-0.084224	0.482247	0.432656	0.108743	0.261191	0.02571	0.063578	0.621426	-0.186471	0.189819	0.376775	0.263285	0.21516	0.157627	0.437393	0.298327	0.139043	0.645513	0.817332	0.075376	0.334268	0.159689	0.197218	0.310284	0.170197	0.229597	0.592854
ENSG00000085832	EPS15	epidermal growth factor receptor pathway substrate 15 [Source:HGNC Symbol;Acc:HGNC:3419]	2060	0.238283	0.0457781	0.1345	0.526488	0.32473	0.00543048	0.0302476	0.813467	0.137186	0.320382	0.460501	0.170452	0.12023	0.41704	0.583649	0.129263	0.165079	0.581589	0.802598	0.086708	0.415624	0.0730533	0.134022	0.475903	0.162841	0.0204395	0.583038
ENSG00000067064	IDI1	isopentenyl-diphosphate delta isomerase 1 [Source:HGNC Symbol;Acc:HGNC:5387]	3422	0.0484102	0.682225	0.507782	0.0695565	0.0946685	0.417711	0.297829	0.128759	0.0202566	0.885918	0.657176	0.0523813	-0.114133	0.449728	0.596688	0.11846	0.0994604	0.716191	0.828025	0.0657367	0.197017	0.367202	0.306943	0.152015	0.170189	0.26224	0.601662
ENSG00000188419	CHM	CHM Rab escort protein [Source:HGNC Symbol;Acc:HGNC:1940]	1121	-0.0194474	0.867729	0.563044	0.0532038	0.153343	0.18223	0.186446	0.269695	-0.0790214	0.567334	0.559629	0.0886637	-0.0131045	0.929559	0.744108	0.0509032	0.130855	0.641391	0.814743	0.0760266	0.540396	0.00894617	0.0615931	0.83153	0.170175	0.11276	0.583038
ENSG00000128340	RAC2	Rac family small GTPase 2 [Source:HGNC Symbol;Acc:HGNC:9802]	5880	0.0967478	0.409233	0.399843	0.13176	0.320855	0.0047509	0.0284937	0.825612	0.0875629	0.533062	0.546183	0.0960898	0.218461	0.144074	0.425486	0.315478	-0.0126266	0.96544	0.867456	0.0502207	0.523647	0.0156414	0.0721332	0.758348	0.170016	0.292504	0.607928
ENSG00000141252	VPS53	VPS53 subunit of GARP complex [Source:HGNC Symbol;Acc:HGNC:25608]	55275	0.0790216	0.508811	0.442162	0.10177	0.0425078	0.719656	0.41147	0.0649889	0.0529376	0.711245	0.60828	0.0659911	0.180809	0.235824	0.494061	0.223467	-0.0835057	0.778332	0.837189	0.0593877	-0.296363	0.205528	0.224086	0.258779	0.170001	0.0904317	0.583038
ENSG00000111348	ARHGDIB	Rho GDP dissociation inhibitor beta [Source:HGNC Symbol;Acc:HGNC:679]	397	-0.00449715	0.969976	0.590833	0.0501633	0.0887583	0.452027	0.312408	0.11753	-0.0414574	0.765489	0.626029	0.0603461	-0.0971462	0.51374	0.625577	0.100697	-0.157265	0.608775	0.8093	0.0815537	0.29139	0.231832	0.239066	0.235053	0.169968	0.184274	0.583038
ENSG00000111913	RIPOR2	RHO family interacting cell polarization regulator 2 [Source:HGNC Symbol;Acc:HGNC:13872]	9750	-0.126689	0.287006	0.337421	0.188346	-0.0626303	0.595597	0.368783	0.0831066	-0.213317	0.12333	0.317394	0.345297	-0.385699	0.00815591	0.239527	0.778934	-0.0786472	0.791546	0.840663	0.0582688	0.372218	0.107981	0.163234	0.392943	0.169942	0.136196	0.583038
ENSG00000205758	CRYZL1	crystallin zeta like 1 [Source:HGNC Symbol;Acc:HGNC:2420]	9946	0.0511408	0.67001	0.503196	0.0712048	0.00808104	0.945764	0.477441	0.0505336	-0.0328694	0.81858	0.638859	0.0561014	-0.00497351	0.974171	0.754491	0.0501211	0.0695147	0.808514	0.844285	0.0569444	-0.180008	0.432813	0.335592	0.126185	0.162818	0.0193562	0.583038
ENSG00000130176	CNN1	calponin 1 [Source:HGNC Symbol;Acc:HGNC:2155]	1264	-0.286266	0.0149732	0.074796	0.699104	-0.194128	0.0983592	0.131122	0.386374	-0.381815	0.0044604	0.109149	0.83775	-0.323554	0.0262815	0.295383	0.623119	0.074596	0.773935	0.836354	0.0597774	0.129975	0.533078	0.375742	0.0972936	0.169754	0.450402	0.661667
ENSG00000135164	DMTF1	cyclin D binding myb like transcription factor 1 [Source:HGNC Symbol;Acc:HGNC:14603]	9988	0.0373985	0.755593	0.532372	0.0612483	0.289864	0.0131229	0.0464995	0.716284	-0.0121451	0.931928	0.668857	0.0508433	0.234925	0.119714	0.406101	0.351017	-0.065731	0.831317	0.847583	0.0553583	0.361882	0.133496	0.17951	0.347872	0.169748	0.0594978	0.583038
ENSG00000131089	ARHGEF9	Cdc42 guanine nucleotide exchange factor 9 [Source:HGNC Symbol;Acc:HGNC:14561]	23229	-0.226201	0.0562861	0.15012	0.489901	-0.0820845	0.487727	0.327852	0.107249	-0.355715	0.00926273	0.133079	0.764711	-0.277683	0.0611739	0.344334	0.478225	0.145468	0.627	0.812424	0.078381	0.226847	0.342802	0.294976	0.163502	0.169739	0.0500402	0.583038
ENSG00000102401	ARMCX3	armadillo repeat containing X-linked 3 [Source:HGNC Symbol;Acc:HGNC:24065]	51566	-0.204934	0.0853058	0.184509	0.413256	0.153893	0.193121	0.19231	0.258938	-0.255605	0.0657594	0.256482	0.464865	0.0183368	0.903215	0.739538	0.0517099	-0.223161	0.447832	0.761472	0.121141	0.422804	0.0633474	0.126277	0.505674	0.169538	0.135231	0.583038
ENSG00000247556	OIP5-AS1	OIP5 antisense RNA 1 [Source:HGNC Symbol;Acc:HGNC:43563]	729082	0.092003	0.444372	0.41681	0.119913	0.161725	0.172627	0.180874	0.279792	0.0343378	0.805619	0.635825	0.057027	0.0834676	0.576379	0.646598	0.0868518	0.205047	0.486978	0.774962	0.109255	0.213689	0.366766	0.3068	0.15221	0.16248	0.0485191	0.583038
ENSG00000075303	SLC25A40	solute carrier family 25 member 40 [Source:HGNC Symbol;Acc:HGNC:29680]	55972	0.17984	0.130318	0.23011	0.332897	0.211628	0.0711799	0.10948	0.447039	0.116871	0.394343	0.496672	0.137581	0.123692	0.400292	0.577958	0.135331	0.170763	0.575956	0.801481	0.0878425	0.198287	0.418358	0.329202	0.13132	0.169378	0.173187	0.583038
ENSG00000138613	APH1B	aph-1 homolog B, gamma-secretase subunit [Source:HGNC Symbol;Acc:HGNC:24080]	83464	0.204389	0.080984	0.179976	0.423011	0.388559	0.000590334	0.0126514	0.945692	0.191383	0.169003	0.361942	0.285111	0.331398	0.0245051	0.29003	0.634001	0.0546242	0.857206	0.853542	0.0538184	0.468283	0.0428272	0.106241	0.584674	0.169372	0.0828071	0.583038
ENSG00000132965	ALOX5AP	arachidonate 5-lipoxygenase activating protein [Source:HGNC Symbol;Acc:HGNC:436]	241	0.134631	0.248431	0.314448	0.213375	0.0823398	0.476572	0.322811	0.11032	0.155638	0.255334	0.421446	0.209295	-0.0466398	0.751534	0.704371	0.0616669	-0.203126	0.490211	0.775623	0.108349	0.216424	0.359493	0.303825	0.155519	0.169345	0.310869	0.615013
ENSG00000185222	TCEAL9	transcription elongation factor A like 9 [Source:HGNC Symbol;Acc:HGNC:30084]	51186	-0.300031	0.0110548	0.0652323	0.737573	-0.0313164	0.792315	0.433754	0.0580327	-0.311333	0.0246104	0.179012	0.63334	-0.170247	0.258281	0.50685	0.20727	-0.32946	0.232248	0.661668	0.234705	0.275795	0.214216	0.229137	0.250549	0.169329	0.341446	0.626626
ENSG00000160883	HK3	hexokinase 3 [Source:HGNC Symbol;Acc:HGNC:4925]	3101	-0.0982339	0.409292	0.399843	0.131739	-0.22964	0.0491509	0.0903569	0.514036	-0.0229771	0.872441	0.653473	0.0529835	-0.287383	0.0574978	0.34136	0.489584	-0.544827	0.0354412	0.42423	0.620951	-0.379456	0.0741409	0.134854	0.472795	0.169304	0.417453	0.652106
ENSG00000188315	C3orf62	chromosome 3 open reading frame 62 [Source:HGNC Symbol;Acc:HGNC:24771]	375341	-0.0161038	0.893415	0.570407	0.0520721	0.128869	0.276898	0.235568	0.194474	-0.0544459	0.703097	0.605131	0.0669618	0.083281	0.586232	0.649151	0.0849446	-0.0274084	0.924165	0.861372	0.0510662	0.0438823	0.85005	0.4806	0.0542168	0.169272	0.168978	0.583038
ENSG00000236859	NIFK-AS1	NIFK antisense RNA 1 [Source:HGNC Symbol;Acc:HGNC:27385]	254128	-0.0908356	0.450057	0.418952	0.118137	-0.14096	0.235009	0.21432	0.22324	-0.22936	0.104247	0.300914	0.377599	-0.384536	0.00986991	0.242476	0.757369	0.418636	0.150314	0.587937	0.322906	0.281683	0.23439	0.23997	0.232924	0.162397	0.0324778	0.583038
ENSG00000134013	LOXL2	lysyl oxidase like 2 [Source:HGNC Symbol;Acc:HGNC:6666]	4017	0.0648136	0.581253	0.472429	0.0858036	0.398703	0.000386343	0.0108608	0.958211	0.0398029	0.776765	0.628687	0.0593427	0.335638	0.0229361	0.28637	0.644114	0.140335	0.62466	0.811882	0.0787762	0.572624	0.0062173	0.055895	0.869993	0.169123	0.38052	0.640182
ENSG00000184584	STING1	stimulator of interferon response cGAMP interactor 1 [Source:HGNC Symbol;Acc:HGNC:27962]	340061	-0.0434372	0.716734	0.519138	0.0653202	0.20994	0.073796	0.111458	0.440347	-0.0666162	0.63399	0.583392	0.0766168	0.0851897	0.569808	0.645379	0.0881623	-0.0248808	0.934662	0.86276	0.0507907	0.455493	0.0494371	0.113268	0.556266	0.16912	0.202797	0.584142
ENSG00000173674	EIF1AX	eukaryotic translation initiation factor 1A X-linked [Source:HGNC Symbol;Acc:HGNC:3250]	1964	-0.0540632	0.538152	0.454575	0.0948008	-0.0675559	0.436552	0.306123	0.122418	-0.0724978	0.485307	0.527948	0.108083	-0.0705009	0.52676	0.630069	0.0975573	0.0160285	0.933239	0.862457	0.0508256	-0.0734572	0.632957	0.413442	0.0773906	0.16172	0.0445451	0.583038
ENSG00000143333	RGS16	regulator of G protein signaling 16 [Source:HGNC Symbol;Acc:HGNC:9997]	6004	-0.088829	0.458421	0.421823	0.11559	0.150314	0.203374	0.198305	0.249421	-0.14726	0.295309	0.445758	0.184092	0.0357634	0.813264	0.7175	0.0564726	-0.00731014	0.979235	0.868963	0.0500797	0.381733	0.0782632	0.137966	0.461386	0.168838	0.348565	0.629396
ENSG00000115956	PLEK	pleckstrin [Source:HGNC Symbol;Acc:HGNC:9070]	5341	-0.0364046	0.756821	0.53268	0.0611311	0.220141	0.0559067	0.0967353	0.491117	-0.0804979	0.562662	0.55842	0.0896231	0.0501729	0.736581	0.699209	0.0631816	0.00215481	0.994294	0.87008	0.050006	0.486042	0.0330244	0.0951468	0.634103	0.16878	0.458157	0.663814
ENSG00000106723	SPIN1	spindlin 1 [Source:HGNC Symbol;Acc:HGNC:11243]	10927	-0.0727269	0.531605	0.45214	0.0962932	0.286451	0.0113111	0.0436853	0.734797	-0.14625	0.28213	0.439599	0.191892	0.184445	0.204853	0.470015	0.249137	0.0302368	0.920914	0.860893	0.05116	0.661305	0.00220776	0.0489002	0.944294	0.161512	0.0132137	0.583038
ENSG00000243509	TNFRSF6B	TNF receptor superfamily member 6b [Source:HGNC Symbol;Acc:HGNC:11921]	8771	0.124249	0.299459	0.344244	0.18117	0.138193	0.243048	0.218754	0.217252	0.101831	0.474439	0.525873	0.111112	0.00614115	0.967956	0.754013	0.0501864	0.16225	0.573945	0.800803	0.0882533	0.502656	0.0204595	0.0785855	0.717036	0.16869	0.359983	0.631884
ENSG00000167394	ZNF668	zinc finger protein 668 [Source:HGNC Symbol;Acc:HGNC:25821]	79759	-0.0326803	0.781648	0.540338	0.0589059	0.175895	0.129172	0.1526	0.334577	-0.115734	0.39659	0.496737	0.136726	-0.00853994	0.953583	0.751087	0.0503915	0.205812	0.436083	0.760107	0.125062	0.517866	0.00789537	0.0597506	0.845537	0.168575	0.0812762	0.583038
ENSG00000102409	BEX4	brain expressed X-linked 4 [Source:HGNC Symbol;Acc:HGNC:25475]	56271	-0.222245	0.0629845	0.158334	0.469526	-0.00539743	0.963949	0.481735	0.0502355	-0.222621	0.115943	0.311517	0.357169	-0.105839	0.488873	0.613102	0.107115	-0.444954	0.110278	0.548167	0.388458	0.154601	0.504213	0.364675	0.104545	0.168524	0.217736	0.589863
ENSG00000122756	CNTFR	ciliary neurotrophic factor receptor [Source:HGNC Symbol;Acc:HGNC:2170]	1271	0.0466403	0.695021	0.51179	0.0679146	0.117463	0.317119	0.255109	0.171644	0.00877795	0.947918	0.672728	0.050493	0.0108812	0.939773	0.747367	0.0506597	0.0897799	0.741336	0.832165	0.0629446	0.41685	0.0446195	0.108306	0.576633	0.168451	0.106989	0.583038
ENSG00000128699	ORMDL1	ORMDL sphingolipid biosynthesis regulator 1 [Source:HGNC Symbol;Acc:HGNC:16036]	94101	0.0647939	0.58676	0.474345	0.0847515	0.0834587	0.478907	0.323846	0.109667	-0.00893355	0.949294	0.672844	0.0504673	-0.0592135	0.693924	0.686526	0.0680949	0.257545	0.24142	0.667042	0.227222	0.364301	0.0315634	0.0933196	0.642413	0.161369	0.0226705	0.583038
ENSG00000124216	SNAI1	snail family transcriptional repressor 1 [Source:HGNC Symbol;Acc:HGNC:11128]	6615	-0.0618501	0.604425	0.481472	0.0815154	0.144591	0.219294	0.206865	0.23569	-0.0589735	0.677089	0.596105	0.0702887	0.0039101	0.979459	0.755577	0.0500766	-0.222009	0.4487	0.76188	0.120858	0.28441	0.222781	0.234212	0.242826	0.168271	0.180705	0.583038
ENSG00000183010	PYCR1	pyrroline-5-carboxylate reductase 1 [Source:HGNC Symbol;Acc:HGNC:9721]	5831	-0.227498	0.0573513	0.151474	0.486525	-0.0627937	0.599378	0.370114	0.0824189	-0.321896	0.0220973	0.173289	0.649732	-0.229217	0.13267	0.417392	0.331277	0.0122402	0.963708	0.867328	0.0502435	0.268206	0.205953	0.224323	0.258366	0.168156	0.17969	0.583038
ENSG00000260231	KDM7A-DT	KDM7A divergent transcript [Source:HGNC Symbol;Acc:HGNC:48959]	100134229	0.0148854	0.89827	0.571765	0.0518864	0.269038	0.0176559	0.052946	0.676653	-0.0144665	0.915645	0.664372	0.051297	0.10863	0.457065	0.600002	0.116209	0.0379614	0.900391	0.859901	0.0518447	0.75102	0.000231573	0.0405977	0.995318	0.167973	0.179275	0.583038
ENSG00000119681	LTBP2	latent transforming growth factor beta binding protein 2 [Source:HGNC Symbol;Acc:HGNC:6715]	4053	0.0562716	0.639834	0.492552	0.0756317	0.178059	0.132253	0.15513	0.330097	-0.0251897	0.860804	0.650211	0.05356	0.0922125	0.548698	0.637439	0.0925882	0.32616	0.240492	0.666634	0.227962	0.371155	0.0908119	0.148936	0.429843	0.167957	0.158805	0.583038
ENSG00000147027	TMEM47	transmembrane protein 47 [Source:HGNC Symbol;Acc:HGNC:18515]	83604	-0.0506697	0.672249	0.503991	0.0708967	0.10301	0.383882	0.284547	0.141334	-0.0460582	0.742823	0.619725	0.0625366	0.068194	0.650207	0.672938	0.0741111	-0.199636	0.487169	0.774962	0.109202	0.236197	0.304071	0.275593	0.184388	0.167777	0.0799907	0.583038
ENSG00000176903	PNMA1	PNMA family member 1 [Source:HGNC Symbol;Acc:HGNC:9158]	9240	0.248134	0.0292536	0.1051	0.601197	0.380923	0.000558964	0.012323	0.94747	0.275749	0.0404931	0.217575	0.551876	0.291406	0.043464	0.320698	0.539593	0.0266932	0.926434	0.862117	0.0510031	0.604361	0.0035815	0.0520028	0.915486	0.167551	0.0888372	0.583038
ENSG00000162614	NEXN	nexilin F-actin binding protein [Source:HGNC Symbol;Acc:HGNC:29557]	91624	-0.237924	0.0464902	0.135517	0.523797	-0.0607097	0.611348	0.374646	0.0803034	-0.27032	0.0551245	0.239664	0.497256	-0.251854	0.0966088	0.387303	0.392184	-0.326058	0.239763	0.666415	0.228547	0.228263	0.309888	0.278474	0.181019	0.167492	0.056884	0.583038
ENSG00000007384	RHBDF1	rhomboid 5 homolog 1 [Source:HGNC Symbol;Acc:HGNC:20561]	64285	-0.137565	0.234508	0.305177	0.223621	0.101126	0.377912	0.281909	0.143728	-0.192088	0.159514	0.35342	0.296065	-0.0500556	0.734142	0.698735	0.0634386	-0.202286	0.484051	0.774035	0.110086	0.314893	0.168171	0.20224	0.299559	0.167309	0.152607	0.583038
ENSG00000132821	VSTM2L	V-set and transmembrane domain containing 2 like [Source:HGNC Symbol;Acc:HGNC:16096]	128434	-0.252489	0.0330924	0.11223	0.58131	-0.312623	0.00721082	0.0350044	0.785526	-0.269484	0.0519367	0.234359	0.508018	-0.450688	0.00193333	0.213188	0.897987	-0.403055	0.181264	0.618713	0.284158	-0.0524379	0.833359	0.476734	0.0552268	0.167285	0.201685	0.584142
ENSG00000113845	TIMMDC1	translocase of inner mitochondrial membrane domain containing 1 [Source:HGNC Symbol;Acc:HGNC:1321]	51300	0.220426	0.0624672	0.157937	0.47103	0.0121232	0.918313	0.470981	0.0512134	0.100993	0.476399	0.526127	0.110557	-0.249756	0.0974656	0.388636	0.390494	0.59458	0.027068	0.404505	0.669922	0.263098	0.248334	0.246858	0.221815	0.16135	0.0167316	0.583038
ENSG00000168228	ZCCHC4	zinc finger CCHC-type containing 4 [Source:HGNC Symbol;Acc:HGNC:22917]	29063	0.0601673	0.606545	0.482378	0.0811411	0.0061392	0.957671	0.480463	0.0503248	-0.0636657	0.649977	0.588053	0.0741456	-0.104438	0.486845	0.61217	0.107664	0.0791145	0.73225	0.830054	0.0639174	-0.0218857	0.906711	0.496708	0.0516168	0.160644	0.0300239	0.583038
ENSG00000170571	EMB	embigin [Source:HGNC Symbol;Acc:HGNC:30465]	133418	0.0448566	0.697377	0.512346	0.0676215	0.1885	0.0961245	0.129246	0.390726	-0.0305702	0.819722	0.63929	0.0560232	-0.0198095	0.890413	0.73611	0.0521959	0.038414	0.900275	0.859901	0.0518491	0.522063	0.0232667	0.0828742	0.695892	0.167041	0.123405	0.583038
ENSG00000168062	BATF2	basic leucine zipper ATF-like transcription factor 2 [Source:HGNC Symbol;Acc:HGNC:25163]	116071	-0.176359	0.127401	0.228191	0.337203	0.0081068	0.943902	0.477161	0.050571	-0.272694	0.0437016	0.22311	0.53864	-0.142112	0.332447	0.545456	0.164393	0.0441213	0.867908	0.855603	0.0532609	0.336177	0.102876	0.159279	0.403268	0.166965	0.49193	0.672416
ENSG00000168876	ANKRD49	ankyrin repeat domain 49 [Source:HGNC Symbol;Acc:HGNC:25970]	54851	0.159006	0.183493	0.271945	0.268411	0.0454349	0.702167	0.404591	0.0670346	0.0221079	0.874888	0.654364	0.052869	-0.133848	0.372336	0.565831	0.146369	0.477193	0.048783	0.475965	0.558932	0.365156	0.0630666	0.126277	0.506595	0.159905	0.00248106	0.583038
ENSG00000185262	UBALD2	UBA like domain containing 2 [Source:HGNC Symbol;Acc:HGNC:28438]	283991	0.160792	0.177529	0.267249	0.274562	0.207151	0.0780274	0.115554	0.429964	0.0720458	0.605584	0.572495	0.0813922	-0.0141891	0.924472	0.743015	0.0510388	0.212514	0.464714	0.766939	0.115802	0.536905	0.0133097	0.0686526	0.781277	0.166835	0.151709	0.583038
ENSG00000131773	KHDRBS3	KH RNA binding domain containing, signal transduction associated 3 [Source:HGNC Symbol;Acc:HGNC:18117]	10656	-0.15124	0.197113	0.281396	0.255166	0.0755974	0.516092	0.339036	0.099972	-0.183207	0.186302	0.375461	0.266779	-0.00232437	0.9876	0.756304	0.0500279	-0.123559	0.648031	0.817521	0.0749837	0.332351	0.115902	0.168669	0.377864	0.166795	0.131301	0.583038
ENSG00000100234	TIMP3	TIMP metallopeptidase inhibitor 3 [Source:HGNC Symbol;Acc:HGNC:11822]	7078	-0.300693	0.00980755	0.0614684	0.751735	-0.16545	0.156295	0.170708	0.298459	-0.300802	0.028151	0.187816	0.612251	-0.271778	0.0656702	0.350776	0.465117	-0.468168	0.0972723	0.535134	0.415208	-0.0319382	0.892647	0.492529	0.0521451	0.166762	0.290516	0.606689
ENSG00000240344	PPIL3	peptidylprolyl isomerase like 3 [Source:HGNC Symbol;Acc:HGNC:9262]	53938	0.165445	0.17005	0.26127	0.282606	0.156684	0.189252	0.189962	0.26268	0.131963	0.349672	0.478535	0.156252	0.0369338	0.807635	0.716478	0.0568784	0.0595974	0.845514	0.850378	0.05448	0.201205	0.410398	0.325847	0.134273	0.166727	0.395605	0.644606
ENSG00000105894	PTN	pleiotrophin [Source:HGNC Symbol;Acc:HGNC:9630]	5764	-0.283854	0.0137879	0.0718381	0.709928	-0.0992575	0.391167	0.287331	0.138487	-0.317205	0.0180077	0.163385	0.679594	-0.207378	0.154555	0.43396	0.302073	-0.274428	0.336903	0.719073	0.166461	0.0871581	0.708408	0.439069	0.0666655	0.166553	0.407629	0.648552
ENSG00000172432	GTPBP2	GTP binding protein 2 [Source:HGNC Symbol;Acc:HGNC:4670]	54676	0.0377094	0.75323	0.531329	0.0614758	0.280987	0.0161282	0.050954	0.689116	-0.0399341	0.778192	0.628756	0.0592197	0.147817	0.329009	0.544016	0.166088	0.172375	0.567801	0.800155	0.0895275	0.534076	0.0181998	0.0761624	0.735523	0.16654	0.196021	0.584142
ENSG00000182853	VMO1	vitelline membrane outer layer 1 homolog [Source:HGNC Symbol;Acc:HGNC:30387]	284013	0.202072	0.0926588	0.192528	0.397671	0.118574	0.321114	0.256761	0.169587	0.28525	0.0426626	0.222145	0.542837	0.155648	0.307688	0.533811	0.177172	-0.276189	0.341868	0.723544	0.163966	0.020223	0.932101	0.502771	0.0508541	0.166476	0.460568	0.664161
ENSG00000275302	CCL4	C-C motif chemokine ligand 4 [Source:HGNC Symbol;Acc:HGNC:10630]	6351	-0.0661672	0.57439	0.469728	0.0871445	0.120007	0.302204	0.248046	0.179641	-0.153843	0.260962	0.425152	0.205454	-0.0211985	0.88562	0.734636	0.0523939	0.0985879	0.749065	0.83303	0.0621485	0.367645	0.126856	0.175596	0.358674	0.166435	0.7542	0.754587
ENSG00000116741	RGS2	regulator of G protein signaling 2 [Source:HGNC Symbol;Acc:HGNC:9998]	5997	-0.11934	0.314672	0.352718	0.172921	0.0210221	0.858307	0.454142	0.0536827	-0.169477	0.222174	0.399766	0.234257	-0.145712	0.328392	0.5435	0.166395	-0.0364687	0.8957	0.859204	0.0520239	0.353635	0.10165	0.158343	0.405823	0.166412	0.275387	0.603974
ENSG00000172115	CYCS	cytochrome c, somatic [Source:HGNC Symbol;Acc:HGNC:19986]	54205	-0.301295	0.0106676	0.064351	0.741851	-0.151654	0.20005	0.196603	0.252445	-0.358376	0.00927254	0.133079	0.76459	-0.329495	0.0266542	0.296584	0.620907	-0.416844	0.118507	0.553527	0.373135	0.187662	0.394973	0.31871	0.140261	0.159259	0.0143793	0.583038
ENSG00000119280	C1orf198	chromosome 1 open reading frame 198 [Source:HGNC Symbol;Acc:HGNC:25900]	84886	0.159012	0.169625	0.261006	0.283075	0.342007	0.00230147	0.0208693	0.880897	0.101836	0.461657	0.520819	0.11483	0.286012	0.0507895	0.332662	0.512028	0.168102	0.462505	0.76615	0.116482	0.409491	0.0171249	0.0745167	0.744846	0.15904	0.0387386	0.583038
ENSG00000051523	CYBA	cytochrome b-245 alpha chain [Source:HGNC Symbol;Acc:HGNC:2577]	1535	0.0893017	0.452012	0.420104	0.117535	0.316617	0.00598666	0.0319649	0.804198	0.0498609	0.721987	0.612558	0.0647618	0.221933	0.136341	0.419551	0.326043	0.100116	0.745688	0.83303	0.0624929	0.49844	0.0331084	0.0952614	0.633634	0.166126	0.26772	0.602964
ENSG00000177311	ZBTB38	zinc finger and BTB domain containing 38 [Source:HGNC Symbol;Acc:HGNC:26636]	253461	0.0901904	0.441472	0.41548	0.120834	0.270817	0.0178207	0.0530822	0.675355	0.0360414	0.79451	0.633031	0.0578764	0.196319	0.182713	0.45371	0.270423	0.220072	0.4656	0.767123	0.115531	0.501481	0.0286628	0.0903699	0.659804	0.166016	0.136042	0.583038
ENSG00000174996	KLC2	kinesin light chain 2 [Source:HGNC Symbol;Acc:HGNC:20716]	64837	0.0643351	0.581963	0.472656	0.0856667	0.140679	0.222145	0.2085	0.233354	-0.0442063	0.743308	0.619762	0.0624873	0.11562	0.423234	0.586901	0.127114	0.37467	0.136425	0.577402	0.343287	0.175917	0.395939	0.318886	0.139876	0.165909	0.139401	0.583038
ENSG00000174606	ANGEL2	angel homolog 2 [Source:HGNC Symbol;Acc:HGNC:30534]	90806	0.00625398	0.957704	0.587603	0.0503243	0.240823	0.0366405	0.0773518	0.564478	-0.0168507	0.904494	0.662044	0.0516647	0.0477178	0.751131	0.704249	0.0617064	-0.108283	0.707514	0.827153	0.0667742	0.578892	0.00582969	0.0553648	0.876072	0.16585	0.132278	0.583038
ENSG00000103275	UBE2I	ubiquitin conjugating enzyme E2 I [Source:HGNC Symbol;Acc:HGNC:12485]	7329	0.0780603	0.5039	0.440251	0.10301	0.219694	0.0550205	0.0960762	0.493984	-0.0901378	0.514051	0.539174	0.10062	0.0538536	0.716327	0.695254	0.0654024	0.497203	0.054262	0.476756	0.537468	0.491837	0.0149463	0.0716171	0.764951	0.158828	0.0148742	0.583038
ENSG00000152601	MBNL1	muscleblind like splicing regulator 1 [Source:HGNC Symbol;Acc:HGNC:6923]	4154	0.0410179	0.730633	0.524272	0.0637816	0.0538759	0.647532	0.387155	0.074453	-0.0450966	0.752861	0.622809	0.0615375	-0.0534137	0.727829	0.69749	0.064117	-0.140548	0.57095	0.800803	0.0888709	-0.036815	0.854564	0.481852	0.0539631	0.157949	0.0119761	0.583038
ENSG00000188342	GTF2F2	general transcription factor IIF subunit 2 [Source:HGNC Symbol;Acc:HGNC:4653]	2963	0.0077732	0.946612	0.584901	0.050517	0.13739	0.22969	0.21161	0.22734	-0.170262	0.213562	0.39475	0.241478	-0.0247127	0.866991	0.730316	0.053247	0.477475	0.0316341	0.421678	0.642004	0.371362	0.0391877	0.102401	0.601872	0.157732	0.0380815	0.583038
ENSG00000089639	GMIP	GEM interacting protein [Source:HGNC Symbol;Acc:HGNC:24852]	51291	0.170626	0.136113	0.23386	0.324632	0.365768	0.000936058	0.0152021	0.928445	0.115348	0.397746	0.497173	0.136288	0.292915	0.042371	0.31794	0.54403	0.0654251	0.813559	0.844962	0.0565746	0.378763	0.0770483	0.13673	0.464689	0.165641	0.106656	0.583038
ENSG00000165055	METTL2B	methyltransferase 2B, methylcytidine [Source:HGNC Symbol;Acc:HGNC:18272]	55798	0.0866047	0.462778	0.423447	0.114293	0.0139384	0.90506	0.467269	0.0516415	-0.00194268	0.989002	0.682038	0.0500219	0.00665201	0.964872	0.75329	0.0502241	0.348903	0.222317	0.654619	0.243235	-0.109986	0.639423	0.415527	0.0763409	0.157295	0.0436036	0.583038
ENSG00000164253	WDR41	WD repeat domain 41 [Source:HGNC Symbol;Acc:HGNC:25601]	55255	0.180002	0.129167	0.22937	0.334584	0.232331	0.0467194	0.0880999	0.522938	0.09173	0.504805	0.536053	0.102937	0.0443496	0.763817	0.706347	0.0604998	0.145898	0.624065	0.811882	0.0788773	0.491998	0.0290003	0.0905075	0.657715	0.165295	0.155214	0.583038
ENSG00000101773	RBBP8	RB binding protein 8, endonuclease [Source:HGNC Symbol;Acc:HGNC:9891]	5932	-0.059721	0.614915	0.484965	0.0796908	-0.116834	0.318836	0.255872	0.170756	-0.270119	0.0525848	0.235675	0.505785	-0.352888	0.0173183	0.269266	0.685097	0.70297	0.00393019	0.247862	0.90883	0.278693	0.195384	0.218686	0.268934	0.157182	0.0466862	0.583038
ENSG00000147400	CETN2	centrin 2 [Source:HGNC Symbol;Acc:HGNC:1867]	1069	-0.133248	0.264306	0.324729	0.202519	0.0190817	0.872078	0.458214	0.0529944	-0.272841	0.0513173	0.233538	0.510174	-0.206843	0.171148	0.446973	0.282728	0.359006	0.188359	0.626649	0.276342	0.341791	0.116646	0.16927	0.376502	0.16516	0.0832489	0.583038
ENSG00000172071	EIF2AK3	eukaryotic translation initiation factor 2 alpha kinase 3 [Source:HGNC Symbol;Acc:HGNC:3255]	9451	-0.222379	0.0626114	0.158188	0.47061	0.128495	0.27995	0.237148	0.192594	-0.239906	0.083085	0.277717	0.420936	-0.000491162	0.997388	0.757825	0.0500012	-0.148471	0.606067	0.808826	0.082044	0.442461	0.0444954	0.108188	0.577181	0.165109	0.358426	0.631884
ENSG00000093183	SEC22C	SEC22 homolog C, vesicle trafficking protein [Source:HGNC Symbol;Acc:HGNC:16828]	9117	0.0381766	0.749498	0.530416	0.0618402	0.0058015	0.960894	0.48104	0.0502772	-0.0551143	0.696166	0.602732	0.0678139	-0.167155	0.267149	0.513165	0.201349	-0.114326	0.707312	0.827153	0.0667987	0.174916	0.473906	0.352714	0.113033	0.156098	0.00335169	0.583038
ENSG00000163565	IFI16	interferon gamma inducible protein 16 [Source:HGNC Symbol;Acc:HGNC:5395]	3428	-0.208031	0.0834216	0.183006	0.417451	0.0909721	0.447257	0.310466	0.119007	-0.284741	0.0419512	0.221036	0.545759	-0.0648797	0.670112	0.678262	0.0712423	-0.0726827	0.800984	0.842518	0.0575167	0.411733	0.06327	0.126277	0.505927	0.164451	0.130909	0.583038
ENSG00000126226	PCID2	PCI domain containing 2 [Source:HGNC Symbol;Acc:HGNC:25653]	55795	0.0714146	0.546714	0.458066	0.0929012	0.0799191	0.495288	0.330704	0.105237	-0.0542708	0.700085	0.603865	0.0673291	-0.0732277	0.627576	0.663653	0.0776513	0.272402	0.312956	0.704075	0.179277	0.250481	0.247791	0.246643	0.222233	0.155634	0.0113309	0.583038
ENSG00000102572	STK24	serine/threonine kinase 24 [Source:HGNC Symbol;Acc:HGNC:11403]	8428	0.0475942	0.685283	0.509204	0.0691563	0.285444	0.0124517	0.0452489	0.722928	0.0146907	0.915731	0.664372	0.0512944	0.15337	0.300695	0.530602	0.181035	-0.110786	0.707843	0.827153	0.0667341	0.409947	0.0724797	0.133725	0.47756	0.15477	0.0195296	0.583038
ENSG00000239704	CDRT4	CMT1A duplicated region transcript 4 [Source:HGNC Symbol;Acc:HGNC:14383]	284040	-0.314884	0.00754627	0.0533455	0.780763	-0.0706702	0.552081	0.351677	0.0917397	-0.410951	0.00302054	0.0975896	0.868662	-0.136125	0.373819	0.566085	0.145753	0.00212141	0.99332	0.87008	0.0500082	0.154401	0.446108	0.341135	0.121706	0.164259	0.481329	0.669901
ENSG00000067533	RRP15	ribosomal RNA processing 15 homolog [Source:HGNC Symbol;Acc:HGNC:24255]	51018	-0.146198	0.213687	0.291797	0.24039	-0.15531	0.181511	0.186102	0.27043	-0.279081	0.038474	0.212513	0.560649	-0.254629	0.0794258	0.365645	0.429468	0.501399	0.0746982	0.513268	0.471219	0.11378	0.630435	0.412322	0.0778072	0.164032	0.178757	0.583038
ENSG00000213694	S1PR3	sphingosine-1-phosphate receptor 3 [Source:HGNC Symbol;Acc:HGNC:3167]	1903	-0.180666	0.130998	0.230319	0.331909	0.0186433	0.875625	0.458938	0.052829	-0.242729	0.081245	0.275899	0.425182	-0.124077	0.409845	0.581564	0.131823	-0.0286432	0.92102	0.860893	0.0511569	0.364221	0.104691	0.160681	0.399539	0.163905	0.2226	0.589863
ENSG00000074657	ZNF532	zinc finger protein 532 [Source:HGNC Symbol;Acc:HGNC:30940]	55205	-0.141888	0.236841	0.306183	0.221854	0.113175	0.340908	0.265787	0.15989	-0.128717	0.358843	0.481059	0.152145	0.0854297	0.570634	0.645687	0.0879957	-0.232711	0.375211	0.735044	0.148489	0.172766	0.415116	0.327871	0.132512	0.163801	0.246109	0.598563
ENSG00000168389	MFSD2A	major facilitator superfamily domain containing 2A [Source:HGNC Symbol;Acc:HGNC:25897]	84879	-0.153208	0.18639	0.274158	0.265503	0.0506905	0.659971	0.391365	0.0726205	-0.269989	0.0394629	0.214945	0.556307	-0.0750423	0.598821	0.652642	0.0826051	0.413651	0.166668	0.606612	0.301414	0.460864	0.0496348	0.11332	0.555466	0.163741	0.238505	0.596358
ENSG00000139146	SINHCAF	SIN3-HDAC complex associated factor [Source:HGNC Symbol;Acc:HGNC:30702]	58516	-0.239404	0.0419946	0.129044	0.541394	0.0685003	0.560651	0.35488	0.0899307	-0.314346	0.0229404	0.175097	0.644086	-0.160283	0.286568	0.521953	0.189213	-0.316688	0.283573	0.687553	0.197005	0.446119	0.0519738	0.115458	0.546198	0.163708	0.0775528	0.583038
ENSG00000253729	PRKDC	protein kinase, DNA-activated, catalytic subunit [Source:HGNC Symbol;Acc:HGNC:9413]	5591	0.264271	0.0210479	0.0879515	0.651517	0.210874	0.0641815	0.103334	0.466086	0.239689	0.0850593	0.281178	0.416476	0.19776	0.186971	0.456378	0.266109	0.192215	0.295403	0.692806	0.189578	0.0863988	0.564001	0.387573	0.0903299	0.163688	0.0967974	0.583038
ENSG00000188820	CALHM6	calcium homeostasis modulator family member 6 [Source:HGNC Symbol;Acc:HGNC:33391]	441168	-0.0803115	0.50331	0.440128	0.10316	0.0799177	0.500826	0.332521	0.103797	-0.0436172	0.757328	0.62424	0.0611079	-0.100884	0.50429	0.622269	0.103068	-0.211811	0.467027	0.767123	0.115097	0.350891	0.12525	0.174595	0.361378	0.163574	0.440841	0.65789
ENSG00000132341	RAN	RAN, member RAS oncogene family [Source:HGNC Symbol;Acc:HGNC:9846]	5901	-0.0481085	0.679783	0.506854	0.0698796	0.0503154	0.66257	0.392113	0.0722486	-0.149501	0.266232	0.428531	0.20195	-0.0940906	0.515126	0.626025	0.100355	0.206268	0.275221	0.684849	0.202504	0.263243	0.0759106	0.136035	0.467827	0.16353	0.0696237	0.583038
ENSG00000107731	UNC5B	unc-5 netrin receptor B [Source:HGNC Symbol;Acc:HGNC:12568]	219699	-0.146593	0.219448	0.295413	0.235563	0.228424	0.0515888	0.0928026	0.505474	-0.127751	0.353485	0.480391	0.154526	0.188021	0.20126	0.466989	0.252408	-0.191157	0.515497	0.787095	0.101619	0.366935	0.110704	0.164784	0.387636	0.163514	0.299896	0.611429
ENSG00000157368	IL34	interleukin 34 [Source:HGNC Symbol;Acc:HGNC:28529]	146433	-0.0951704	0.430926	0.411212	0.124265	0.192218	0.10589	0.136919	0.372376	-0.211292	0.13525	0.330118	0.327583	-0.0197679	0.897119	0.738137	0.0519336	0.114307	0.705641	0.827153	0.0670032	0.528553	0.0197068	0.0776131	0.723037	0.163469	0.333115	0.624787
ENSG00000013573	DDX11	DEAD/H-box helicase 11 [Source:HGNC Symbol;Acc:HGNC:2736]	1663	0.306354	0.0093572	0.0598876	0.75714	0.0958325	0.419252	0.298407	0.128223	0.24821	0.0775307	0.269543	0.43403	-0.0549818	0.718302	0.695445	0.065177	0.47993	0.0968667	0.535134	0.416098	0.385454	0.0983516	0.155588	0.412856	0.163421	0.10872	0.583038
ENSG00000070756	PABPC1	poly(A) binding protein cytoplasmic 1 [Source:HGNC Symbol;Acc:HGNC:8554]	26986	-0.0253621	0.831532	0.554083	0.0552344	0.243784	0.0364165	0.0770105	0.565502	-0.0883186	0.533332	0.546206	0.0960276	0.138279	0.361985	0.559723	0.150772	-0.12089	0.691267	0.824794	0.0688223	0.308122	0.199856	0.221176	0.264381	0.153389	0.0367183	0.583038
ENSG00000183718	TRIM52	tripartite motif containing 52 [Source:HGNC Symbol;Acc:HGNC:19024]	84851	0.0465753	0.696052	0.51194	0.067786	0.223124	0.0560872	0.0968541	0.490538	-0.063706	0.655854	0.590405	0.0732745	0.0228198	0.881672	0.733874	0.0525635	0.36212	0.191325	0.629763	0.273174	0.596434	0.00337536	0.0513025	0.919534	0.152603	0.0412226	0.583038
ENSG00000102225	CDK16	cyclin dependent kinase 16 [Source:HGNC Symbol;Acc:HGNC:8749]	5127	0.11825	0.304041	0.346953	0.178628	0.271917	0.0154618	0.0500822	0.694815	-0.0120517	0.930859	0.668689	0.05087	0.24859	0.0913934	0.38076	0.402793	0.354095	0.179266	0.616368	0.286425	0.175513	0.416683	0.328536	0.131934	0.152233	0.0479415	0.583038
ENSG00000166479	TMX3	thioredoxin related transmembrane protein 3 [Source:HGNC Symbol;Acc:HGNC:24718]	54495	0.195969	0.0968625	0.196967	0.389278	0.368881	0.0012505	0.0164764	0.915334	0.0587777	0.674708	0.595576	0.0706111	0.307424	0.03745	0.307842	0.565241	0.487594	0.0394033	0.444094	0.600819	0.46755	0.0117102	0.0663221	0.798431	0.151592	0.0342732	0.583038
ENSG00000277443	MARCKS	myristoylated alanine rich protein kinase C substrate [Source:HGNC Symbol;Acc:HGNC:6759]	4082	0.00518834	0.965257	0.589441	0.0502187	0.254292	0.0287351	0.0675824	0.604035	-0.0168583	0.905492	0.662232	0.0516299	0.117126	0.440477	0.594096	0.121386	0.021737	0.942232	0.863275	0.0506177	0.608228	0.00508192	0.0550186	0.888335	0.162545	0.348149	0.629396
ENSG00000120686	UFM1	ubiquitin fold modifier 1 [Source:HGNC Symbol;Acc:HGNC:20597]	51569	-0.14863	0.211148	0.29001	0.242566	0.171305	0.14456	0.163432	0.313213	-0.179768	0.194573	0.381279	0.258677	0.0910554	0.541849	0.635523	0.0940978	-0.18347	0.522814	0.789023	0.0997847	0.414487	0.0615357	0.124832	0.51168	0.162539	0.123169	0.583038
ENSG00000198836	OPA1	OPA1 mitochondrial dynamin like GTPase [Source:HGNC Symbol;Acc:HGNC:8140]	4976	0.122136	0.304148	0.346953	0.178569	0.0707219	0.548348	0.350367	0.0925451	0.0700598	0.613042	0.574672	0.080089	0.0667427	0.653099	0.673537	0.0736803	-0.192386	0.512479	0.786042	0.102389	-0.117254	0.621521	0.408719	0.079312	0.151227	0.01607	0.583038
ENSG00000164951	PDP1	pyruvate dehydrogenase phosphatase catalytic subunit 1 [Source:HGNC Symbol;Acc:HGNC:9279]	54704	-0.102897	0.389741	0.39045	0.139038	0.273697	0.0191045	0.0547892	0.665525	-0.217634	0.118146	0.312999	0.353551	0.126605	0.399441	0.577885	0.13565	0.078777	0.796435	0.842001	0.0578743	0.535928	0.0188704	0.0767597	0.729886	0.162467	0.105025	0.583038
ENSG00000136560	TANK	TRAF family member associated NFKB activator [Source:HGNC Symbol;Acc:HGNC:11562]	10010	0.0454658	0.692491	0.511051	0.0682324	0.195356	0.0833844	0.119716	0.417535	0.018288	0.891616	0.658488	0.0521476	-0.0319441	0.824229	0.719238	0.0557197	-0.300689	0.322999	0.709938	0.173738	0.553872	0.015749	0.0721332	0.757343	0.150693	0.0389805	0.583038
ENSG00000146067	FAM193B	family with sequence similarity 193 member B [Source:HGNC Symbol;Acc:HGNC:25524]	54540	0.11459	0.341623	0.367079	0.159554	0.132103	0.267377	0.231464	0.200513	-0.0134403	0.924656	0.666965	0.0510337	0.0600462	0.693243	0.686164	0.0681808	0.426394	0.147138	0.586841	0.32738	0.0757379	0.756295	0.453507	0.0614296	0.162247	0.21469	0.587962
ENSG00000143748	NVL	nuclear VCP like [Source:HGNC Symbol;Acc:HGNC:8070]	4931	-0.0493408	0.68307	0.50815	0.0694454	0.0122599	0.918365	0.470981	0.0512118	-0.262608	0.0620993	0.250448	0.47546	-0.163769	0.281907	0.520079	0.192028	0.3587	0.201643	0.641695	0.262596	0.16987	0.460288	0.346616	0.117169	0.162225	0.100357	0.583038
ENSG00000164128	NPY1R	neuropeptide Y receptor Y1 [Source:HGNC Symbol;Acc:HGNC:7956]	4886	-0.155215	0.197447	0.281488	0.254853	0.0584485	0.625125	0.379288	0.0779818	-0.192697	0.173494	0.365185	0.280158	0.0377249	0.804956	0.716259	0.0570762	-0.0844766	0.772408	0.836354	0.0599148	0.198706	0.39456	0.318559	0.140427	0.162088	0.190005	0.583038
ENSG00000148700	ADD3	adducin 3 [Source:HGNC Symbol;Acc:HGNC:245]	120	0.151085	0.202304	0.284905	0.250388	0.360722	0.00163772	0.0181082	0.901323	0.120716	0.396143	0.496737	0.136895	0.282387	0.0612311	0.344334	0.478053	-0.0223036	0.935619	0.862892	0.0507676	0.457357	0.02798	0.0895001	0.664085	0.162081	0.122778	0.583038
ENSG00000183508	TENT5C	terminal nucleotidyltransferase 5C [Source:HGNC Symbol;Acc:HGNC:24712]	54855	-0.0218337	0.853184	0.559962	0.0539576	0.214401	0.0636691	0.102958	0.467552	-0.120335	0.392761	0.49595	0.138189	0.178687	0.235151	0.493523	0.223981	0.0319379	0.904859	0.859901	0.051682	0.139296	0.515548	0.369321	0.101606	0.161953	0.255427	0.600847
ENSG00000122435	TRMT13	tRNA methyltransferase 13 homolog [Source:HGNC Symbol;Acc:HGNC:25502]	54482	0.138266	0.2341	0.304928	0.223933	0.0572991	0.619358	0.377334	0.078939	0.0161289	0.906962	0.662704	0.0515793	0.0509762	0.730246	0.697914	0.063855	0.266508	0.347351	0.727448	0.16127	-0.11077	0.631337	0.412604	0.0776577	0.161914	0.0569413	0.583038
ENSG00000100918	REC8	REC8 meiotic recombination protein [Source:HGNC Symbol;Acc:HGNC:16879]	9985	-0.0189046	0.875803	0.565304	0.0528208	-0.0926493	0.438057	0.306758	0.12193	-0.059719	0.673961	0.595263	0.0707129	-0.303714	0.0427113	0.318423	0.542638	0.182856	0.534972	0.792333	0.0968439	0.232147	0.324665	0.285878	0.172843	0.161888	0.21068	0.587962
ENSG00000135363	LMO2	LIM domain only 2 [Source:HGNC Symbol;Acc:HGNC:6642]	4005	0.0122688	0.917682	0.577065	0.0512323	0.0397573	0.73489	0.416841	0.0633289	-0.00992725	0.943818	0.671698	0.0505739	-0.00303172	0.983978	0.756001	0.0500466	-0.117432	0.687982	0.824794	0.0692537	-0.0368231	0.876154	0.488203	0.0528623	0.161785	0.0884891	0.583038
ENSG00000118873	RAB3GAP2	RAB3 GTPase activating non-catalytic protein subunit 2 [Source:HGNC Symbol;Acc:HGNC:17168]	25782	0.0248296	0.836348	0.555233	0.0549342	0.160126	0.175956	0.182937	0.276222	-0.0922054	0.518727	0.541128	0.0994768	0.0266221	0.862184	0.728319	0.0534888	0.313247	0.260001	0.677932	0.213117	0.263047	0.240091	0.242362	0.228283	0.161774	0.0548179	0.583038
ENSG00000119812	FAM98A	family with sequence similarity 98 member A [Source:HGNC Symbol;Acc:HGNC:24520]	25940	-0.0722398	0.540293	0.455617	0.0943203	0.146514	0.207792	0.200665	0.245488	-0.115011	0.41281	0.50341	0.13076	0.148463	0.323363	0.541217	0.168926	-0.123716	0.6626	0.81999	0.0727878	0.113751	0.618565	0.407257	0.0798223	0.161771	0.382195	0.641367
ENSG00000175395	ZNF25	zinc finger protein 25 [Source:HGNC Symbol;Acc:HGNC:13043]	219749	-0.0684102	0.568326	0.466777	0.0883574	0.0902924	0.446259	0.310057	0.119319	-0.150821	0.28808	0.442611	0.188313	-0.136079	0.371728	0.565315	0.146623	-0.073756	0.806433	0.844007	0.0571002	0.437836	0.057986	0.121746	0.523914	0.150169	0.0379019	0.583038
ENSG00000186132	C2orf76	chromosome 2 open reading frame 76 [Source:HGNC Symbol;Acc:HGNC:27017]	130355	-0.0386397	0.744191	0.528285	0.0623696	0.0396463	0.735045	0.416847	0.0633126	-0.087513	0.532324	0.546052	0.09626	-0.053675	0.721077	0.695901	0.0648638	-0.139468	0.613135	0.810881	0.0807747	0.0938409	0.67348	0.427081	0.0712284	0.161566	0.0901388	0.583038
ENSG00000249915	PDCD6	programmed cell death 6 [Source:HGNC Symbol;Acc:HGNC:8765]	10016	0.296471	0.0107893	0.0646311	0.740496	0.138248	0.236186	0.214886	0.222348	0.27893	0.0465304	0.227699	0.527617	0.105277	0.489058	0.613225	0.107065	0.32984	0.181964	0.619442	0.283372	0.032936	0.871941	0.486897	0.0530626	0.149704	0.0260947	0.583038
ENSG00000123130	ACOT9	acyl-CoA thioesterase 9 [Source:HGNC Symbol;Acc:HGNC:17152]	23597	0.225863	0.0529616	0.145915	0.500802	0.359677	0.00152305	0.0174895	0.905274	0.116914	0.368537	0.484116	0.147964	0.212424	0.125161	0.411723	0.342466	0.182388	0.487824	0.775006	0.109017	0.552059	0.00367968	0.0525484	0.913589	0.149603	0.0405239	0.583038
ENSG00000011478	QPCTL	glutaminyl-peptide cyclotransferase like [Source:HGNC Symbol;Acc:HGNC:25952]	54814	-0.203262	0.087276	0.186608	0.40896	0.00500435	0.966337	0.48224	0.0502053	-0.294696	0.0330035	0.200122	0.586419	-0.067455	0.654219	0.673768	0.0735148	-0.0983757	0.72134	0.828025	0.0651393	0.19253	0.382406	0.313292	0.145418	0.161358	0.053452	0.583038
ENSG00000038274	MAT2B	methionine adenosyltransferase 2B [Source:HGNC Symbol;Acc:HGNC:6905]	27430	-0.0818057	0.496102	0.436791	0.105023	0.149936	0.205881	0.199642	0.247178	-0.162243	0.248772	0.418057	0.213909	-0.0221311	0.88387	0.734183	0.0524684	-0.109762	0.715913	0.828025	0.0657694	0.424769	0.0676718	0.129821	0.491934	0.148921	0.0210059	0.583038
ENSG00000019102	VSIG2	V-set and immunoglobulin domain containing 2 [Source:HGNC Symbol;Acc:HGNC:17149]	23584	-0.121213	0.304047	0.346953	0.178625	-0.0198623	0.865216	0.456337	0.0533282	-0.270922	0.0474091	0.22881	0.524306	-0.187335	0.204808	0.470015	0.249178	0.277191	0.351084	0.728683	0.159471	0.315574	0.182377	0.211113	0.282909	0.161317	0.141473	0.583038
ENSG00000134531	EMP1	epithelial membrane protein 1 [Source:HGNC Symbol;Acc:HGNC:3333]	2012	-0.203365	0.0904125	0.190174	0.402305	-0.126801	0.288279	0.241134	0.187595	-0.156141	0.260609	0.42503	0.205692	-0.236494	0.110117	0.395365	0.367078	-0.673641	0.00178052	0.22823	0.954275	-0.0558574	0.77836	0.460324	0.0593853	0.16128	0.251052	0.599199
ENSG00000175387	SMAD2	SMAD family member 2 [Source:HGNC Symbol;Acc:HGNC:6768]	4087	0.00711253	0.951707	0.585933	0.0504229	0.259248	0.023595	0.0612838	0.634526	-0.0383015	0.778687	0.628756	0.0591773	0.117923	0.418445	0.584181	0.128771	-0.0262637	0.931492	0.862457	0.0508695	0.564721	0.0124154	0.0674526	0.79071	0.161201	0.10009	0.583038
ENSG00000121769	FABP3	fatty acid binding protein 3 [Source:HGNC Symbol;Acc:HGNC:3557]	2170	-0.206201	0.0831247	0.182599	0.41812	-0.0386433	0.744748	0.419102	0.0623134	-0.149318	0.284005	0.441016	0.190753	-0.160471	0.282657	0.520079	0.191571	-0.475011	0.0753239	0.513268	0.469462	0.163133	0.465494	0.349084	0.115563	0.161188	0.455618	0.663211
ENSG00000100307	CBX7	chromobox 7 [Source:HGNC Symbol;Acc:HGNC:1557]	23492	0.0205445	0.864292	0.562424	0.0533745	0.103203	0.384522	0.284838	0.141081	0.00912976	0.948896	0.672844	0.0504746	0.100928	0.50782	0.623779	0.102173	-0.13582	0.624584	0.811882	0.078789	0.0830117	0.711129	0.440132	0.0663372	0.161186	0.166615	0.583038
ENSG00000119655	NPC2	NPC intracellular cholesterol transporter 2 [Source:HGNC Symbol;Acc:HGNC:14537]	10577	0.108669	0.36026	0.376376	0.15114	0.0268891	0.819407	0.441932	0.0560317	0.116579	0.411035	0.502617	0.131395	-0.0880369	0.562918	0.643227	0.08957	-0.273649	0.328168	0.712882	0.170981	0.0837956	0.713648	0.440772	0.0660368	0.161093	0.057282	0.583038
ENSG00000168495	POLR3D	RNA polymerase III subunit D [Source:HGNC Symbol;Acc:HGNC:1080]	661	-0.106206	0.374545	0.383414	0.145102	0.134734	0.254164	0.225346	0.209358	-0.182113	0.182815	0.373471	0.270318	0.0230431	0.875849	0.732006	0.0528246	0.2705	0.313428	0.704075	0.179012	0.53661	0.00684481	0.0570506	0.860514	0.161017	0.238023	0.596321
ENSG00000213199	ASIC3	acid sensing ion channel subunit 3 [Source:HGNC Symbol;Acc:HGNC:101]	9311	0.198225	0.0861003	0.185542	0.411512	0.0919204	0.424143	0.300632	0.126544	0.0667761	0.633728	0.583281	0.0766586	-0.194233	0.193442	0.460952	0.259761	0.529483	0.0539585	0.476582	0.538608	0.416875	0.0605896	0.124064	0.514879	0.161	0.0680436	0.583038
ENSG00000134490	TMEM241	transmembrane protein 241 [Source:HGNC Symbol;Acc:HGNC:31723]	85019	0.121326	0.312095	0.351289	0.174281	0.133208	0.261633	0.229018	0.20429	-0.0359349	0.799268	0.634429	0.0575062	-0.108707	0.472121	0.606911	0.111774	0.338352	0.252703	0.674333	0.218497	0.342158	0.146921	0.188654	0.327689	0.160927	0.102975	0.583038
ENSG00000213465	ARL2	ADP ribosylation factor like GTPase 2 [Source:HGNC Symbol;Acc:HGNC:693]	402	-0.0615865	0.610355	0.484235	0.0804753	0.0417966	0.726779	0.413987	0.0641988	-0.183414	0.192189	0.379312	0.260972	-0.145241	0.336674	0.547799	0.162341	0.303515	0.281501	0.686715	0.198348	0.421083	0.0549299	0.118666	0.53498	0.160835	0.134689	0.583038
ENSG00000141934	PLPP2	phospholipid phosphatase 2 [Source:HGNC Symbol;Acc:HGNC:9230]	8612	0.0401142	0.734854	0.525203	0.0633327	0.15146	0.194201	0.192888	0.257909	-0.0325552	0.815492	0.638234	0.0563156	0.0774408	0.604209	0.654756	0.0816364	0.294081	0.229106	0.658612	0.237353	0.272402	0.164243	0.20011	0.304448	0.160684	0.310501	0.615013
ENSG00000116871	MAP7D1	MAP7 domain containing 1 [Source:HGNC Symbol;Acc:HGNC:25514]	55700	0.0889249	0.448289	0.418368	0.118685	0.278804	0.0147048	0.0490945	0.701501	0.0139989	0.919811	0.665115	0.0511715	0.122839	0.408578	0.581033	0.132281	0.277078	0.249128	0.674047	0.221207	0.508983	0.00385541	0.0534384	0.910238	0.160668	0.115225	0.583038
ENSG00000138668	HNRNPD	heterogeneous nuclear ribonucleoprotein D [Source:HGNC Symbol;Acc:HGNC:5036]	3184	-0.00222818	0.98488	0.594285	0.0500414	0.106185	0.360177	0.274073	0.151177	-0.132391	0.342532	0.473848	0.159556	0.0291262	0.846015	0.723254	0.054369	0.322341	0.185126	0.623297	0.27986	0.12939	0.51751	0.370182	0.101109	0.148044	0.0204981	0.583038
ENSG00000092094	OSGEP	O-sialoglycoprotein endopeptidase [Source:HGNC Symbol;Acc:HGNC:18028]	55644	-0.137471	0.248472	0.314448	0.213346	0.107167	0.363848	0.275959	0.149591	-0.312386	0.0221866	0.173289	0.649127	-0.010693	0.942907	0.748283	0.0505926	0.454777	0.0731109	0.510307	0.475738	0.356	0.082792	0.142103	0.449482	0.160521	0.0938917	0.583038
ENSG00000003402	CFLAR	CASP8 and FADD like apoptosis regulator [Source:HGNC Symbol;Acc:HGNC:1876]	8837	-0.0109971	0.927227	0.579215	0.0509622	0.196258	0.0968426	0.129789	0.389317	-0.069538	0.623155	0.579024	0.0783788	0.061684	0.684302	0.682461	0.0693304	-0.0300346	0.921961	0.8609	0.0511293	0.390943	0.100478	0.157548	0.408296	0.160506	0.25591	0.600847
ENSG00000213999	MEF2B	myocyte enhancer factor 2B [Source:HGNC Symbol;Acc:HGNC:6995]	4207	-0.0849283	0.479948	0.431418	0.109378	-0.00740536	0.950428	0.478822	0.0504456	-0.167148	0.236363	0.408728	0.223057	-0.143195	0.344801	0.553413	0.158496	0.0743836	0.804937	0.843916	0.0572132	0.124352	0.607637	0.403446	0.0817591	0.160463	0.155395	0.583038
ENSG00000175182	FAM131A	family with sequence similarity 131 member A [Source:HGNC Symbol;Acc:HGNC:28308]	131408	0.0757331	0.530332	0.451368	0.0965875	0.298137	0.0110944	0.0433402	0.737142	0.0551225	0.698627	0.603236	0.0675085	0.22049	0.145405	0.426817	0.313719	0.00208786	0.994561	0.87008	0.0500055	0.445639	0.0576844	0.121362	0.524983	0.160404	0.0920671	0.583038
ENSG00000167088	SNRPD1	small nuclear ribonucleoprotein D1 polypeptide [Source:HGNC Symbol;Acc:HGNC:11158]	6632	-0.113848	0.338567	0.366145	0.160996	-0.0455842	0.699152	0.403654	0.0674027	-0.238499	0.091377	0.289187	0.402827	-0.11544	0.449731	0.596688	0.118459	0.105665	0.655021	0.819242	0.0739144	-0.191242	0.310253	0.278731	0.180811	0.160336	0.131359	0.583038
ENSG00000182923	CEP63	centrosomal protein 63 [Source:HGNC Symbol;Acc:HGNC:25815]	80254	-0.18863	0.115005	0.215367	0.356676	-0.10596	0.37313	0.279878	0.145685	-0.284293	0.0376846	0.210241	0.564179	-0.190289	0.198819	0.464949	0.254668	0.270525	0.291166	0.690411	0.192191	0.197477	0.340752	0.293998	0.164522	0.160061	0.197512	0.584142
ENSG00000167232	ZNF91	zinc finger protein 91 [Source:HGNC Symbol;Acc:HGNC:13166]	7644	0.21581	0.0536051	0.146711	0.498647	0.314461	0.0039888	0.0261178	0.84054	0.207338	0.12465	0.318449	0.343253	0.2268	0.116906	0.402935	0.35558	0.000958734	0.997197	0.870338	0.0500015	0.462868	0.0238957	0.0834081	0.691398	0.14682	0.0420239	0.583038
ENSG00000101928	MOSPD1	motile sperm domain containing 1 [Source:HGNC Symbol;Acc:HGNC:25235]	56180	-0.00194154	0.986605	0.594701	0.0500325	0.113614	0.319352	0.25605	0.17049	-0.00572398	0.966151	0.676461	0.050208	0.0324554	0.822321	0.71905	0.0558472	-0.226438	0.344744	0.725264	0.162544	0.0906316	0.642341	0.416663	0.0758758	0.159904	0.0846153	0.583038
ENSG00000196569	LAMA2	laminin subunit alpha 2 [Source:HGNC Symbol;Acc:HGNC:6482]	3908	-0.155229	0.186388	0.274158	0.265505	-0.135116	0.245554	0.220139	0.215434	-0.197292	0.155011	0.35015	0.301512	-0.254915	0.0853297	0.374558	0.415872	-0.11948	0.629775	0.812579	0.0779169	0.0548327	0.784313	0.461686	0.0588716	0.159795	0.241381	0.597269
ENSG00000141506	PIK3R5	phosphoinositide-3-kinase regulatory subunit 5 [Source:HGNC Symbol;Acc:HGNC:30035]	23533	0.156877	0.182946	0.271669	0.268966	0.270392	0.0190537	0.0547664	0.665905	0.141459	0.309633	0.455051	0.176119	0.186563	0.210264	0.475033	0.244335	-0.0095591	0.975137	0.868597	0.0501142	0.397856	0.094221	0.151956	0.421998	0.159787	0.188227	0.583038
ENSG00000172348	RCAN2	regulator of calcineurin 2 [Source:HGNC Symbol;Acc:HGNC:3041]	10231	-0.214521	0.0694013	0.165926	0.451716	-0.162605	0.165806	0.176934	0.287345	-0.245768	0.0763713	0.268729	0.436872	-0.271933	0.0670893	0.351271	0.461144	-0.243865	0.385728	0.74001	0.144029	0.00254122	0.991153	0.517664	0.0500145	0.159786	0.241269	0.597149
ENSG00000113811	SELENOK	selenoprotein K [Source:HGNC Symbol;Acc:HGNC:30394]	58515	-0.175338	0.140448	0.237482	0.318683	0.161695	0.169769	0.179516	0.282916	-0.23166	0.0928569	0.291236	0.399759	-0.0700653	0.638652	0.667969	0.0758806	-0.136692	0.645185	0.817219	0.0754275	0.580887	0.0075813	0.0592034	0.849905	0.159737	0.153654	0.583038
ENSG00000159714	ZDHHC1	zinc finger DHHC-type containing 1 [Source:HGNC Symbol;Acc:HGNC:17916]	29800	-0.127773	0.28125	0.333882	0.191801	0.00799292	0.945859	0.477441	0.0505317	-0.161769	0.249484	0.418505	0.213401	-0.0387055	0.798054	0.714596	0.0575997	-0.0123487	0.964153	0.867456	0.0502375	0.00824501	0.970318	0.512784	0.0501628	0.159662	0.099355	0.583038
ENSG00000114784	EIF1B	eukaryotic translation initiation factor 1B [Source:HGNC Symbol;Acc:HGNC:30792]	10289	-0.0739212	0.523561	0.448689	0.0981753	0.153404	0.179187	0.184636	0.272829	-0.174538	0.200623	0.38612	0.252995	-0.122	0.405582	0.57938	0.133373	0.101832	0.733321	0.830472	0.0638007	0.568955	0.00971498	0.0627068	0.821821	0.159551	0.149793	0.583038
ENSG00000132535	DLG4	discs large MAGUK scaffold protein 4 [Source:HGNC Symbol;Acc:HGNC:2903]	1742	-0.139258	0.240895	0.309513	0.218832	0.230497	0.0481503	0.0894072	0.517654	-0.158148	0.249062	0.418141	0.213702	0.181057	0.217878	0.481985	0.237817	-0.0258092	0.931349	0.862457	0.0508732	0.443806	0.0528245	0.116286	0.542915	0.159456	0.233795	0.595212
ENSG00000081154	PCNP	PEST proteolytic signal containing nuclear protein [Source:HGNC Symbol;Acc:HGNC:30023]	57092	-0.00370094	0.974813	0.592066	0.0501149	0.176232	0.126091	0.150686	0.339167	-0.0895226	0.521706	0.543085	0.0987586	0.0402245	0.788485	0.712868	0.058359	-0.0212457	0.944673	0.864235	0.0505665	0.368398	0.12275	0.173122	0.365657	0.146493	0.00451861	0.583038
ENSG00000132661	NXT1	nuclear transport factor 2 like export factor 1 [Source:HGNC Symbol;Acc:HGNC:15913]	29107	-0.240695	0.0433374	0.131277	0.535982	-0.0343191	0.773407	0.428433	0.0596143	-0.29284	0.0349367	0.204166	0.57695	-0.242171	0.106056	0.392315	0.374296	-0.149192	0.591613	0.805208	0.0847465	0.42442	0.0462492	0.110263	0.569548	0.159204	0.106545	0.583038
ENSG00000143185	XCL2	X-C motif chemokine ligand 2 [Source:HGNC Symbol;Acc:HGNC:10646]	6846	-0.280003	0.0165952	0.0783404	0.68522	-0.0561236	0.63274	0.382065	0.0767487	-0.260826	0.0558171	0.240385	0.494988	-0.163273	0.268382	0.51328	0.200546	-0.419551	0.108293	0.546446	0.392328	0.187952	0.384609	0.314309	0.144495	0.159138	0.582729	0.7008
ENSG00000157020	SEC13	SEC13 homolog, nuclear pore and COPII coat complex component [Source:HGNC Symbol;Acc:HGNC:10697]	6396	-0.114514	0.334127	0.363298	0.163123	0.14336	0.220916	0.20765	0.234356	-0.218902	0.112834	0.309139	0.362395	0.00807	0.956917	0.7519	0.0503372	0.177481	0.513918	0.786448	0.102021	0.454626	0.0273727	0.0885777	0.667956	0.146415	0.017845	0.583038
ENSG00000013619	MAMLD1	mastermind like domain containing 1 [Source:HGNC Symbol;Acc:HGNC:2568]	10046	0.167361	0.149444	0.243944	0.306925	0.469534	1.90682e-05	0.00514799	0.994755	0.128014	0.3628	0.482585	0.150419	0.371095	0.0119622	0.24259	0.734127	0.284641	0.314485	0.704075	0.178418	0.613955	0.00269651	0.0489752	0.933519	0.159006	0.186099	0.583038
ENSG00000105649	RAB3A	RAB3A, member RAS oncogene family [Source:HGNC Symbol;Acc:HGNC:9777]	5864	-0.121644	0.30668	0.348196	0.177187	0.0193008	0.870152	0.457687	0.0530863	-0.224179	0.10375	0.300593	0.378514	-0.0545274	0.714569	0.694713	0.0656045	-0.0418681	0.871279	0.856042	0.0530947	-0.0726535	0.726982	0.445052	0.0645001	0.158928	0.0855626	0.583038
ENSG00000173641	HSPB7	heat shock protein family B (small) member 7 [Source:HGNC Symbol;Acc:HGNC:5249]	27129	-0.101847	0.397246	0.39438	0.136172	-0.033146	0.781032	0.430266	0.0589578	-0.183095	0.193627	0.380592	0.259584	-0.273423	0.068364	0.351763	0.457638	0.110008	0.718551	0.828025	0.0654612	0.4385	0.0618007	0.124997	0.510792	0.158895	0.319004	0.619059
ENSG00000141503	MINK1	misshapen like kinase 1 [Source:HGNC Symbol;Acc:HGNC:17565]	50488	0.288135	0.0124049	0.0684337	0.7234	0.189771	0.0993247	0.131832	0.384522	0.248914	0.0769177	0.269119	0.435528	0.227742	0.132279	0.417261	0.331844	0.182714	0.437908	0.760107	0.124442	-0.0442193	0.817331	0.472878	0.0563051	0.146168	0.0395286	0.583038
ENSG00000088832	FKBP1A	FKBP prolyl isomerase 1A [Source:HGNC Symbol;Acc:HGNC:3711]	2280	0.0828941	0.482559	0.432784	0.108657	0.074551	0.523367	0.341988	0.0982215	0.14234	0.289377	0.442611	0.187546	0.0413768	0.774698	0.709392	0.0595225	-0.347198	0.101948	0.540967	0.4052	-0.00246268	0.988949	0.517142	0.0500226	0.158784	0.122151	0.583038
ENSG00000181885	CLDN7	claudin 7 [Source:HGNC Symbol;Acc:HGNC:2049]	1366	-0.0181565	0.874967	0.564957	0.0528593	0.154581	0.173482	0.181576	0.278868	-0.112139	0.417363	0.505051	0.12915	0.0843505	0.569702	0.645379	0.0881836	0.26606	0.331056	0.714776	0.169468	0.236254	0.283083	0.264198	0.197321	0.158574	0.151681	0.583038
ENSG00000184445	KNTC1	kinetochore associated 1 [Source:HGNC Symbol;Acc:HGNC:17255]	9735	0.0140243	0.907179	0.573869	0.0515687	0.106626	0.369164	0.278297	0.147337	-0.0637285	0.647057	0.587437	0.0745858	0.0123756	0.933932	0.745585	0.0507942	-0.111063	0.711594	0.827153	0.0662815	-0.00794093	0.973901	0.513572	0.0501258	0.158525	0.0853373	0.583038
ENSG00000010810	FYN	FYN proto-oncogene, Src family tyrosine kinase [Source:HGNC Symbol;Acc:HGNC:4037]	2534	-0.115794	0.32609	0.358904	0.167074	0.0801451	0.492681	0.329657	0.105925	-0.109126	0.439148	0.511694	0.121815	-0.0783721	0.604614	0.654756	0.0815642	-0.345093	0.220309	0.653942	0.245017	0.315389	0.162125	0.198835	0.307139	0.158459	0.223688	0.58987
ENSG00000034510	TMSB10	thymosin beta 10 [Source:HGNC Symbol;Acc:HGNC:11879]	9168	0.100632	0.400667	0.395809	0.134892	0.260214	0.0262217	0.0643482	0.618378	0.0173723	0.900445	0.661133	0.0518098	0.0338516	0.820044	0.718932	0.0560013	0.237123	0.41045	0.752034	0.134253	0.589912	0.0050688	0.0550186	0.888557	0.158442	0.126004	0.583038
ENSG00000135272	MDFIC	MyoD family inhibitor domain containing [Source:HGNC Symbol;Acc:HGNC:28870]	29969	0.252625	0.0307799	0.107818	0.59306	0.218876	0.0593443	0.0995939	0.480352	0.209164	0.137958	0.333376	0.323782	-0.00743986	0.96106	0.752672	0.0502754	0.2689	0.323492	0.710413	0.173473	0.685313	0.000220124	0.0405977	0.99562	0.158339	0.054397	0.583038
ENSG00000135829	DHX9	DExH-box helicase 9 [Source:HGNC Symbol;Acc:HGNC:2750]	1660	0.0298276	0.802561	0.545916	0.0572398	0.121638	0.30134	0.247618	0.180121	-0.0787074	0.566549	0.559514	0.0888238	0.0570186	0.698639	0.688526	0.0675071	0.33822	0.143463	0.583323	0.332692	0.123252	0.518827	0.370623	0.100778	0.158294	0.101929	0.583038
ENSG00000121068	TBX2	T-box transcription factor 2 [Source:HGNC Symbol;Acc:HGNC:11597]	6909	-0.143421	0.226598	0.29969	0.229776	-0.0463802	0.693741	0.40194	0.068075	-0.194568	0.162552	0.356614	0.292482	-0.122736	0.413354	0.583512	0.130566	0.00556942	0.982983	0.869085	0.0500535	0.0208946	0.920946	0.500689	0.051159	0.158278	0.279967	0.60479
ENSG00000142798	HSPG2	heparan sulfate proteoglycan 2 [Source:HGNC Symbol;Acc:HGNC:5273]	3339	0.126896	0.278861	0.332455	0.193262	0.269408	0.018651	0.0543788	0.668942	0.0966435	0.492104	0.530115	0.106248	0.242375	0.105055	0.391616	0.376115	0.215836	0.451162	0.762684	0.120061	0.341682	0.129585	0.177386	0.354165	0.158136	0.167753	0.583038
ENSG00000104368	PLAT	plasminogen activator, tissue type [Source:HGNC Symbol;Acc:HGNC:9051]	5327	-0.207581	0.0731545	0.170834	0.441968	-0.0298791	0.7961	0.435002	0.0577346	-0.22287	0.10421	0.300914	0.377666	-0.0757155	0.609767	0.657139	0.0806568	-0.237035	0.36267	0.732832	0.154061	0.15165	0.472163	0.351973	0.113551	0.158039	0.531876	0.685929
ENSG00000141524	TMC6	transmembrane channel like 6 [Source:HGNC Symbol;Acc:HGNC:18021]	11322	0.0599954	0.619256	0.486151	0.0789562	0.212801	0.0724139	0.110458	0.443855	-0.0625875	0.653883	0.589877	0.0735644	0.0894166	0.549792	0.638082	0.0923506	0.113413	0.68049	0.823181	0.0702594	0.237073	0.278909	0.261898	0.200049	0.158022	0.179755	0.583038
ENSG00000163877	SNIP1	Smad nuclear interacting protein 1 [Source:HGNC Symbol;Acc:HGNC:30587]	79753	-0.272957	0.0212396	0.0882899	0.650187	-0.124076	0.295565	0.24475	0.183372	-0.293741	0.0357751	0.206281	0.572971	-0.255613	0.0901067	0.379306	0.405499	-0.487198	0.0728064	0.509963	0.476615	-0.00387611	0.986506	0.51669	0.0500336	0.144829	0.0128906	0.583038
ENSG00000203879	GDI1	GDP dissociation inhibitor 1 [Source:HGNC Symbol;Acc:HGNC:4226]	2664	0.232158	0.0463634	0.135439	0.524273	0.325875	0.00423935	0.0269311	0.835459	0.152198	0.263705	0.426367	0.203619	0.231402	0.111068	0.396625	0.365425	0.363076	0.175082	0.616368	0.291265	0.402984	0.055546	0.11924	0.532707	0.144144	0.0301625	0.583038
ENSG00000162521	RBBP4	RB binding protein 4, chromatin remodeling factor [Source:HGNC Symbol;Acc:HGNC:9887]	5928	-0.0643146	0.585061	0.4741	0.0850739	0.203313	0.0786747	0.115965	0.428422	-0.0809433	0.556801	0.556791	0.0908495	0.0969092	0.511409	0.625266	0.101274	-0.171948	0.576991	0.801898	0.0876323	0.452915	0.056213	0.119915	0.53027	0.157793	0.0972482	0.583038
ENSG00000134717	BTF3L4	basic transcription factor 3 like 4 [Source:HGNC Symbol;Acc:HGNC:30547]	91408	-0.0091856	0.939209	0.58297	0.0506707	-0.0409868	0.730793	0.415603	0.0637644	-0.172303	0.221939	0.399536	0.23445	-0.284988	0.0574039	0.34136	0.489882	0.258982	0.390623	0.742341	0.142017	0.307883	0.19987	0.221176	0.264367	0.144031	0.00706099	0.583038
ENSG00000163545	NUAK2	NUAK family kinase 2 [Source:HGNC Symbol;Acc:HGNC:29558]	81788	-0.273098	0.0185556	0.0827096	0.669668	0.0423398	0.716332	0.410259	0.065366	-0.330159	0.0178738	0.163215	0.680651	-0.129836	0.393623	0.575187	0.137857	-0.0937569	0.689157	0.824794	0.0690987	0.364417	0.0414227	0.104635	0.591167	0.157569	0.404589	0.648197
ENSG00000117020	AKT3	AKT serine/threonine kinase 3 [Source:HGNC Symbol;Acc:HGNC:393]	10000	-0.169941	0.156605	0.249699	0.298087	0.148961	0.210012	0.201864	0.243549	-0.147589	0.294435	0.445744	0.184596	0.0665702	0.660129	0.675151	0.0726532	-0.368438	0.206141	0.642755	0.258185	0.34831	0.134805	0.180477	0.34581	0.157512	0.323118	0.621019
ENSG00000166337	TAF10	TATA-box binding protein associated factor 10 [Source:HGNC Symbol;Acc:HGNC:11543]	6881	0.0948934	0.431254	0.411363	0.124156	-0.0750685	0.529397	0.344256	0.0968045	0.0157891	0.910721	0.663819	0.0514537	-0.164791	0.272661	0.514419	0.197793	0.12804	0.672243	0.821537	0.0714023	-0.170687	0.482363	0.355893	0.110569	0.157496	0.275764	0.603974
ENSG00000162734	PEA15	proliferation and apoptosis adaptor protein 15 [Source:HGNC Symbol;Acc:HGNC:8822]	8682	-0.171857	0.15156	0.245145	0.304266	0.0777742	0.513783	0.337941	0.100537	-0.188918	0.174454	0.365982	0.279119	-0.0397601	0.791092	0.713572	0.0581482	-0.28479	0.270802	0.682395	0.205504	0.2466	0.23576	0.240768	0.231796	0.15747	0.152922	0.583038
ENSG00000187479	C11orf96	chromosome 11 open reading frame 96 [Source:HGNC Symbol;Acc:HGNC:38675]	387763	-0.186091	0.122041	0.222732	0.345378	0.0143956	0.904407	0.467162	0.0516643	-0.207781	0.139659	0.334874	0.321434	-0.099167	0.513497	0.62544	0.100756	-0.0796703	0.781254	0.837546	0.0591336	0.285852	0.206802	0.2248	0.257546	0.157453	0.424097	0.653699
ENSG00000111540	RAB5B	RAB5B, member RAS oncogene family [Source:HGNC Symbol;Acc:HGNC:9784]	5869	0.173796	0.136118	0.23386	0.324625	0.37113	0.000982567	0.0153368	0.926381	0.0594557	0.671959	0.594774	0.0709872	0.211207	0.157544	0.437393	0.298427	0.482382	0.0930803	0.531401	0.424592	0.690108	0.000878238	0.0467555	0.977382	0.143419	0.012842	0.583038
ENSG00000079819	EPB41L2	erythrocyte membrane protein band 4.1 like 2 [Source:HGNC Symbol;Acc:HGNC:3379]	2037	0.0511687	0.672996	0.504235	0.0707945	0.206053	0.083355	0.119716	0.417601	0.046471	0.744141	0.620106	0.0624028	0.167117	0.27143	0.513482	0.198579	-0.113927	0.66013	0.819772	0.0731512	0.254094	0.215116	0.229647	0.24972	0.143173	0.0443451	0.583038
ENSG00000103496	STX4	syntaxin 4 [Source:HGNC Symbol;Acc:HGNC:11439]	6810	0.0665963	0.568545	0.466848	0.088313	0.280074	0.0137686	0.0474402	0.71011	-0.0556442	0.686852	0.598911	0.0689982	0.109414	0.458853	0.600671	0.115669	0.335934	0.252692	0.674333	0.218505	0.551796	0.0126546	0.0676837	0.788149	0.157116	0.0660636	0.583038
ENSG00000258890	CEP95	centrosomal protein 95 [Source:HGNC Symbol;Acc:HGNC:25141]	90799	-0.0166831	0.890197	0.569482	0.0522	0.194867	0.100536	0.132921	0.382223	-0.0983831	0.487311	0.528277	0.107537	0.160873	0.288057	0.522132	0.188327	-0.023459	0.939387	0.863275	0.0506802	0.149077	0.546995	0.381095	0.0940617	0.157034	0.161642	0.583038
ENSG00000143387	CTSK	cathepsin K [Source:HGNC Symbol;Acc:HGNC:2536]	1513	-0.0603253	0.618866	0.486151	0.0790218	0.0477868	0.690478	0.400611	0.0684877	-0.133117	0.349261	0.4784	0.156439	-0.143794	0.345429	0.553702	0.158204	0.253209	0.397057	0.74521	0.139431	0.43329	0.0616965	0.124951	0.511141	0.156999	0.281134	0.60484
ENSG00000130021	PUDP	pseudouridine 5'-phosphatase [Source:HGNC Symbol;Acc:HGNC:16818]	8226	0.129451	0.193351	0.2784	0.258719	-0.0892051	0.366127	0.276888	0.148619	0.134676	0.26094	0.425152	0.205468	-0.132346	0.303007	0.532391	0.179745	0.0167572	0.942542	0.863275	0.0506111	-0.021398	0.909126	0.497453	0.0515336	0.156981	0.13806	0.583038
ENSG00000149308	NPAT	nuclear protein, coactivator of histone transcription [Source:HGNC Symbol;Acc:HGNC:7896]	4863	-0.112811	0.344173	0.368636	0.158365	0.254944	0.0289264	0.0677367	0.602983	-0.135579	0.337935	0.471413	0.161736	0.145865	0.336054	0.547348	0.16264	-0.201309	0.506177	0.784431	0.104027	0.605925	0.0062545	0.0559459	0.869419	0.156975	0.0918394	0.583038
ENSG00000106443	PHF14	PHD finger protein 14 [Source:HGNC Symbol;Acc:HGNC:22203]	9678	0.146809	0.20815	0.288432	0.245174	0.0600868	0.60392	0.371688	0.0816052	-0.0487414	0.723301	0.612857	0.0646153	-0.0889816	0.546075	0.637284	0.0931621	0.71113	0.00611079	0.2861	0.871646	0.288815	0.202811	0.222811	0.261439	0.141439	0.04703	0.583038
ENSG00000167106	FAM102A	family with sequence similarity 102 member A [Source:HGNC Symbol;Acc:HGNC:31419]	399665	-0.169924	0.157252	0.250466	0.297309	0.0663005	0.578797	0.362281	0.0862797	-0.258029	0.065089	0.25504	0.466766	-0.0790922	0.602124	0.654282	0.082009	0.0884151	0.752935	0.83303	0.0617606	0.350827	0.108713	0.163705	0.391503	0.156909	0.163195	0.583038
ENSG00000115204	MPV17	mitochondrial inner membrane protein MPV17 [Source:HGNC Symbol;Acc:HGNC:7224]	4358	0.223817	0.0550469	0.148705	0.493899	0.0934763	0.421981	0.299722	0.127283	0.0916113	0.511869	0.538676	0.10116	-0.0561936	0.707656	0.692423	0.0664145	0.484035	0.0462431	0.46798	0.569574	0.0915609	0.657508	0.421739	0.073541	0.156908	0.119047	0.583038
ENSG00000075826	SEC31B	SEC31 homolog B, COPII coat complex component [Source:HGNC Symbol;Acc:HGNC:23197]	25956	-0.128227	0.286837	0.337383	0.188446	0.147633	0.214643	0.204556	0.239578	-0.211929	0.129399	0.323189	0.33607	-0.0342743	0.820509	0.719023	0.0559696	-0.131864	0.642622	0.815584	0.0758313	0.30715	0.169926	0.202915	0.297417	0.156806	0.0781444	0.583038
ENSG00000156711	MAPK13	mitogen-activated protein kinase 13 [Source:HGNC Symbol;Acc:HGNC:6875]	5603	0.125229	0.259834	0.32201	0.205494	0.332403	0.00197372	0.0195746	0.89052	0.0649936	0.609491	0.57375	0.080705	0.209802	0.120861	0.406848	0.349185	0.212036	0.467371	0.767123	0.114992	0.59749	0.00494545	0.0549507	0.890656	0.156797	0.120081	0.583038
ENSG00000161791	FMNL3	formin like 3 [Source:HGNC Symbol;Acc:HGNC:23698]	91010	-0.0935785	0.435779	0.413384	0.122669	0.210329	0.0745197	0.112229	0.438534	-0.120489	0.390882	0.495132	0.138914	0.0873554	0.562211	0.643227	0.0897165	-0.0830895	0.786563	0.839323	0.0586816	0.487712	0.0362781	0.099288	0.616557	0.156786	0.335049	0.624787
ENSG00000108590	MED31	mediator complex subunit 31 [Source:HGNC Symbol;Acc:HGNC:24260]	51003	0.221103	0.0610003	0.155909	0.475357	0.155071	0.186316	0.188407	0.265576	0.138518	0.314733	0.457721	0.173397	0.0190673	0.897644	0.738152	0.0519138	0.335112	0.203371	0.642171	0.260888	0.145056	0.501883	0.364071	0.105164	0.156778	0.146235	0.583038
ENSG00000171603	CLSTN1	calsyntenin 1 [Source:HGNC Symbol;Acc:HGNC:17447]	22883	0.0178159	0.881261	0.56695	0.0525761	0.20265	0.0833065	0.119716	0.41771	0.019283	0.890318	0.658201	0.0521998	0.140837	0.34572	0.553793	0.158069	0.00776976	0.976334	0.868597	0.0501035	0.301242	0.141379	0.184833	0.335769	0.156774	0.0582271	0.583038
ENSG00000243927	MRPS6	mitochondrial ribosomal protein S6 [Source:HGNC Symbol;Acc:HGNC:14051]	64968	0.101694	0.381394	0.387164	0.142325	0.315194	0.00515678	0.0295674	0.818241	0.0873478	0.529019	0.545136	0.0970275	0.114783	0.439839	0.594096	0.121592	0.081587	0.774395	0.836354	0.0597362	0.703877	0.000243615	0.0405977	0.994997	0.156774	0.120678	0.583038
ENSG00000105619	TFPT	TCF3 fusion partner [Source:HGNC Symbol;Acc:HGNC:13630]	29844	-0.080551	0.500957	0.439245	0.103763	-0.00152998	0.989705	0.488318	0.0500192	-0.193846	0.160845	0.354707	0.294487	-0.207652	0.161039	0.441357	0.294257	0.365374	0.156341	0.595927	0.314694	0.440758	0.027379	0.0885777	0.667915	0.156772	0.12373	0.583038
ENSG00000221968	FADS3	fatty acid desaturase 3 [Source:HGNC Symbol;Acc:HGNC:3576]	3995	-0.0265065	0.823728	0.551752	0.0557407	0.205402	0.0784447	0.115902	0.428969	-0.0197897	0.883803	0.656587	0.0524712	0.0767315	0.596613	0.652019	0.0830076	-0.170362	0.489447	0.775623	0.108562	0.460385	0.0120291	0.0667466	0.794907	0.156659	0.14743	0.583038
ENSG00000125772	GPCPD1	glycerophosphocholine phosphodiesterase 1 [Source:HGNC Symbol;Acc:HGNC:26957]	56261	-0.0691689	0.563746	0.465407	0.089291	0.098055	0.407666	0.294328	0.132326	-0.127482	0.367572	0.483827	0.148373	-0.0321044	0.832802	0.721838	0.0551654	-0.112272	0.705518	0.827153	0.0670183	0.29797	0.204124	0.223283	0.260149	0.15657	0.100794	0.583038
ENSG00000133574	GIMAP4	GTPase, IMAP family member 4 [Source:HGNC Symbol;Acc:HGNC:21872]	55303	-0.00804468	0.945504	0.584827	0.0505387	0.127486	0.271944	0.233196	0.197583	-0.0487664	0.721932	0.612558	0.0647679	-0.0184428	0.900105	0.738618	0.0518223	-0.26973	0.324839	0.711398	0.17275	0.270152	0.21782	0.231419	0.247254	0.156503	0.163013	0.583038
ENSG00000124212	PTGIS	prostaglandin I2 synthase [Source:HGNC Symbol;Acc:HGNC:9603]	5740	-0.0874578	0.445806	0.417099	0.119461	0.153282	0.175277	0.182559	0.276945	-0.130887	0.344657	0.475057	0.158563	0.204926	0.165756	0.443407	0.288783	0.0117233	0.9641	0.867456	0.0502382	0.183473	0.3771	0.310983	0.147674	0.156496	0.476074	0.667907
ENSG00000168005	SPINDOC	spindlin interactor and repressor of chromatin binding [Source:HGNC Symbol;Acc:HGNC:25115]	144097	-0.109127	0.358656	0.37561	0.15184	0.109705	0.350922	0.269717	0.155277	-0.159764	0.24046	0.411978	0.219973	-0.00196894	0.989287	0.756368	0.0500208	0.0389668	0.89205	0.859064	0.0521692	0.481964	0.0256762	0.0864192	0.679111	0.15648	0.143792	0.583038
ENSG00000155542	SETD9	SET domain containing 9 [Source:HGNC Symbol;Acc:HGNC:28508]	133383	-0.135823	0.257261	0.320836	0.207234	-0.109985	0.354375	0.27105	0.153729	-0.130237	0.363025	0.482687	0.150322	-0.152148	0.32113	0.54048	0.170068	-0.156997	0.556092	0.798471	0.0920365	-0.0773812	0.719852	0.442578	0.0653106	0.15636	0.263779	0.602157
ENSG00000094841	UPRT	uracil phosphoribosyltransferase homolog [Source:HGNC Symbol;Acc:HGNC:28334]	139596	-0.110861	0.33503	0.363943	0.162687	0.182881	0.1063	0.137123	0.371641	-0.144681	0.278639	0.437387	0.194037	0.0116818	0.935237	0.745837	0.050763	-0.252435	0.362658	0.732832	0.154067	0.366099	0.0921727	0.149884	0.426678	0.156354	0.0683151	0.583038
ENSG00000185101	ANO9	anoctamin 9 [Source:HGNC Symbol;Acc:HGNC:20679]	338440	-0.055563	0.642926	0.493098	0.0751541	0.281908	0.0157182	0.0504592	0.692602	-0.179997	0.204202	0.38873	0.249725	0.0832816	0.585474	0.649151	0.0850888	0.173798	0.56235	0.798922	0.090682	0.532222	0.0179037	0.0755903	0.738055	0.156335	0.344916	0.628714
ENSG00000197006	METTL9	methyltransferase like 9 [Source:HGNC Symbol;Acc:HGNC:24586]	51108	-0.0414314	0.724081	0.522316	0.0644952	0.178683	0.121446	0.147752	0.346308	-0.0370467	0.783018	0.629733	0.0588104	0.0557563	0.698873	0.68868	0.0674782	-0.199372	0.51015	0.785093	0.10299	0.540234	0.0173065	0.0747226	0.743245	0.156167	0.149698	0.583038
ENSG00000047249	ATP6V1H	ATPase H+ transporting V1 subunit H [Source:HGNC Symbol;Acc:HGNC:18303]	51606	-0.00264437	0.982261	0.594174	0.050057	0.201462	0.0842369	0.120283	0.415625	-0.0196534	0.889816	0.658187	0.0522201	0.0557646	0.713661	0.694283	0.0657096	0.0160869	0.952038	0.864961	0.0504255	0.372699	0.0703521	0.132123	0.48381	0.156118	0.235183	0.59525
ENSG00000197702	PARVA	parvin alpha [Source:HGNC Symbol;Acc:HGNC:14652]	55742	0.134341	0.246044	0.312926	0.215081	0.270722	0.0167552	0.0519144	0.683904	0.0172075	0.900639	0.661147	0.0518027	0.214798	0.142617	0.42479	0.317422	0.665729	0.0023709	0.238208	0.940625	0.400528	0.0332505	0.0955085	0.632842	0.141326	0.0166376	0.583038
ENSG00000183578	TNFAIP8L3	TNF alpha induced protein 8 like 3 [Source:HGNC Symbol;Acc:HGNC:20620]	388121	-0.138792	0.248047	0.314305	0.213649	-0.0273919	0.818407	0.441821	0.0561001	-0.232191	0.096838	0.294886	0.39173	-0.276611	0.0642647	0.350512	0.469127	0.042065	0.892056	0.859064	0.0521689	0.289068	0.23832	0.24177	0.22971	0.156068	0.275473	0.603974
ENSG00000108946	PRKAR1A	protein kinase cAMP-dependent type I regulatory subunit alpha [Source:HGNC Symbol;Acc:HGNC:9388]	5573	-0.0396355	0.732822	0.524508	0.0635477	0.200551	0.078297	0.11579	0.429321	-0.0147624	0.912344	0.663829	0.051401	0.178204	0.212301	0.476139	0.242565	-0.326216	0.276961	0.685947	0.20134	0.309176	0.19835	0.220514	0.265901	0.156015	0.0685763	0.583038
ENSG00000152684	PELO	pelota mRNA surveillance and ribosome rescue factor [Source:HGNC Symbol;Acc:HGNC:8829]	53918	-0.119273	0.318056	0.354706	0.171159	0.165176	0.161086	0.173887	0.292772	-0.193695	0.170728	0.362636	0.283192	0.0352554	0.817283	0.718011	0.0561909	0.0513763	0.854979	0.853114	0.0539402	0.395038	0.0678936	0.129821	0.491251	0.156008	0.115588	0.583038
ENSG00000125459	MSTO1	misato mitochondrial distribution and morphology regulator 1 [Source:HGNC Symbol;Acc:HGNC:29678]	55154	-0.0980501	0.415929	0.402914	0.129382	0.107166	0.368607	0.278073	0.147571	-0.178142	0.199498	0.385099	0.254036	0.0204536	0.891347	0.73617	0.0521584	0.23334	0.396003	0.744996	0.13985	0.362417	0.0921369	0.149866	0.42676	0.155863	0.348328	0.629396
ENSG00000153071	DAB2	DAB adaptor protein 2 [Source:HGNC Symbol;Acc:HGNC:2662]	1601	0.110633	0.342571	0.367705	0.159111	0.180588	0.115751	0.143611	0.355446	0.12485	0.361129	0.481409	0.151144	0.15452	0.291088	0.523249	0.18654	-0.26122	0.304764	0.698144	0.183982	0.0275474	0.894799	0.493139	0.0520593	0.155815	0.22772	0.591392
ENSG00000149564	ESAM	endothelial cell adhesion molecule [Source:HGNC Symbol;Acc:HGNC:17474]	90952	0.0672108	0.577042	0.470747	0.0866225	0.0260048	0.82747	0.444163	0.0554948	0.0932287	0.512721	0.538913	0.100948	-0.0390184	0.798505	0.714613	0.0575649	-0.470087	0.0561273	0.485654	0.530582	-0.103128	0.620389	0.40815	0.0795066	0.155638	0.119628	0.583038
ENSG00000149100	EIF3M	eukaryotic translation initiation factor 3 subunit M [Source:HGNC Symbol;Acc:HGNC:24460]	10480	0.0739399	0.537683	0.45437	0.0949067	0.0613916	0.605106	0.372102	0.0813948	-0.0589145	0.678622	0.596452	0.0700826	-0.0405388	0.790295	0.71327	0.0582124	0.187641	0.471786	0.769197	0.113664	0.0717962	0.734268	0.447166	0.0636979	0.140811	0.0121853	0.583038
ENSG00000103145	HCFC1R1	host cell factor C1 regulator 1 [Source:HGNC Symbol;Acc:HGNC:21198]	54985	-0.175877	0.141071	0.237716	0.317843	-0.304254	0.00912897	0.0395302	0.759944	-0.284329	0.0386824	0.212593	0.559726	-0.456897	0.00153585	0.213188	0.910845	0.153663	0.546823	0.797294	0.0941007	0.119599	0.561029	0.386558	0.0909654	0.155327	0.167573	0.583038
ENSG00000137817	PARP6	poly(ADP-ribose) polymerase family member 6 [Source:HGNC Symbol;Acc:HGNC:26921]	56965	-0.0783215	0.508406	0.441974	0.101872	0.267326	0.0207078	0.0567954	0.653899	-0.201963	0.144189	0.339571	0.315325	0.0841	0.573084	0.646233	0.087505	0.239584	0.377152	0.736161	0.147652	0.491676	0.0159534	0.0725651	0.755443	0.155228	0.205029	0.584376
ENSG00000134871	COL4A2	collagen type IV alpha 2 chain [Source:HGNC Symbol;Acc:HGNC:2203]	1284	0.0525597	0.656915	0.497737	0.0730626	0.215628	0.0630466	0.102564	0.469346	0.0246425	0.857082	0.649195	0.0537555	0.155117	0.288149	0.522132	0.188272	0.0923691	0.761759	0.835886	0.0609023	0.305925	0.203213	0.222884	0.261043	0.155217	0.209876	0.586923
ENSG00000067369	TP53BP1	tumor protein p53 binding protein 1 [Source:HGNC Symbol;Acc:HGNC:11999]	7158	-0.0412436	0.732384	0.524462	0.0635943	0.354083	0.00233109	0.0208693	0.880065	-0.105991	0.453853	0.518118	0.117187	0.245464	0.102774	0.391367	0.380329	0.119108	0.68699	0.824794	0.069385	0.590297	0.0061271	0.0558219	0.871392	0.155088	0.158122	0.583038
ENSG00000146112	PPP1R18	protein phosphatase 1 regulatory subunit 18 [Source:HGNC Symbol;Acc:HGNC:29413]	170954	-0.000706768	0.99525	0.596193	0.0500041	0.300732	0.00905184	0.0394679	0.760902	-0.0755562	0.586118	0.566122	0.0849662	0.05881	0.692677	0.685929	0.0682523	0.0515815	0.863616	0.855066	0.053479	0.604132	0.00555239	0.0553648	0.880534	0.155083	0.152824	0.583038
ENSG00000237125	HAND2-AS1	HAND2 antisense RNA 1 [Source:HGNC Symbol;Acc:HGNC:48872]	79804	-0.238695	0.0446306	0.13313	0.530898	-0.0409979	0.730241	0.415549	0.0638237	-0.312111	0.0244222	0.178688	0.634523	-0.150089	0.32008	0.539957	0.170608	-0.0614397	0.832099	0.847865	0.0553078	0.161487	0.486839	0.357686	0.109295	0.154963	0.305142	0.613983
ENSG00000170004	CHD3	chromodomain helicase DNA binding protein 3 [Source:HGNC Symbol;Acc:HGNC:1918]	1107	-0.199175	0.093565	0.193299	0.395832	0.105606	0.371534	0.279115	0.146347	-0.241859	0.0818833	0.276898	0.423699	-0.0107257	0.943261	0.748352	0.0505853	-0.161656	0.594363	0.806494	0.0842211	0.362464	0.127509	0.176154	0.357586	0.154795	0.250321	0.599026
ENSG00000154473	BUB3	BUB3 mitotic checkpoint protein [Source:HGNC Symbol;Acc:HGNC:1151]	9184	-0.00577746	0.960523	0.58805	0.0502824	0.206969	0.0704759	0.108948	0.448878	-0.059398	0.66302	0.591651	0.0722389	0.139295	0.339002	0.549521	0.161227	-0.12115	0.676338	0.822172	0.0708301	0.279532	0.223667	0.234722	0.242047	0.140507	0.0240585	0.583038
ENSG00000280670	CCDC163	CCDC163 homolog [Source:HGNC Symbol;Acc:HGNC:27003]	126661	-0.231188	0.0525684	0.145287	0.50213	0.0558541	0.639305	0.384263	0.0757139	-0.279328	0.0473548	0.228806	0.524509	-0.119188	0.435596	0.592886	0.122971	0.00679501	0.979137	0.868963	0.0500804	0.349262	0.0819209	0.14155	0.451723	0.154489	0.332536	0.624787
ENSG00000162636	FAM102B	family with sequence similarity 102 member B [Source:HGNC Symbol;Acc:HGNC:27637]	284611	0.0883378	0.420454	0.404788	0.127808	0.359712	0.000626624	0.013032	0.943688	0.0681474	0.606593	0.57287	0.0812137	0.383353	0.00543069	0.233761	0.820091	-0.0386763	0.876211	0.85631	0.0528596	0.291693	0.132634	0.178785	0.349241	0.154415	0.06095	0.583038
ENSG00000119900	OGFRL1	opioid growth factor receptor like 1 [Source:HGNC Symbol;Acc:HGNC:21378]	79627	-0.0420235	0.722584	0.521647	0.0646612	0.284737	0.0134141	0.0468378	0.713474	-0.0811757	0.558513	0.557637	0.0904886	0.126595	0.393881	0.57521	0.137759	-0.0320471	0.916692	0.86011	0.0512877	0.626806	0.00460444	0.0538128	0.896575	0.154378	0.302448	0.612112
ENSG00000123636	BAZ2B	bromodomain adjacent to zinc finger domain 2B [Source:HGNC Symbol;Acc:HGNC:963]	29994	-0.0519854	0.648965	0.495126	0.0742374	0.154567	0.169278	0.179214	0.283458	-0.101592	0.46159	0.520819	0.11485	0.190357	0.1961	0.463302	0.257224	-0.0691636	0.793988	0.841404	0.0580704	0.0227637	0.915194	0.499033	0.0513347	0.154336	0.138524	0.583038
ENSG00000128512	DOCK4	dedicator of cytokinesis 4 [Source:HGNC Symbol;Acc:HGNC:19192]	9732	0.114553	0.333339	0.362831	0.163504	0.319595	0.00542643	0.0302476	0.813536	0.152059	0.270599	0.431996	0.199113	0.301778	0.0390338	0.310857	0.55818	-0.194999	0.505159	0.783964	0.104295	0.320629	0.165269	0.200761	0.303158	0.154324	0.184107	0.583038
ENSG00000162444	RBP7	retinol binding protein 7 [Source:HGNC Symbol;Acc:HGNC:30316]	116362	-0.134366	0.253322	0.318082	0.209941	-0.105733	0.364226	0.276137	0.149429	-0.100391	0.461508	0.520819	0.114875	-0.205799	0.15666	0.436438	0.299497	-0.329898	0.2559	0.675407	0.216116	-0.0451643	0.849736	0.48059	0.0542347	0.154294	0.514521	0.679446
ENSG00000109775	UFSP2	UFM1 specific peptidase 2 [Source:HGNC Symbol;Acc:HGNC:25640]	55325	-0.117822	0.322948	0.357422	0.168655	-0.0623603	0.597682	0.369541	0.0827261	-0.262787	0.0621477	0.250448	0.475316	-0.267948	0.0763371	0.36084	0.436956	0.131549	0.651824	0.817901	0.0743998	0.278009	0.228733	0.237716	0.237671	0.154248	0.0725135	0.583038
ENSG00000173200	PARP15	poly(ADP-ribose) polymerase family member 15 [Source:HGNC Symbol;Acc:HGNC:26876]	165631	0.00936661	0.937305	0.582402	0.0507135	0.166194	0.155992	0.170521	0.298827	-0.118992	0.395506	0.496672	0.137137	-0.132956	0.375576	0.566432	0.145028	0.150528	0.616819	0.811348	0.0801264	0.493047	0.0306022	0.0918869	0.64804	0.154194	0.0720343	0.583038
ENSG00000140403	DNAJA4	DnaJ heat shock protein family (Hsp40) member A4 [Source:HGNC Symbol;Acc:HGNC:14885]	55466	-0.174263	0.141595	0.238006	0.317141	-0.0712883	0.545372	0.349461	0.0931951	-0.189285	0.173803	0.365444	0.279823	-0.123532	0.409628	0.581564	0.131901	-0.4567	0.0511596	0.476582	0.549383	-0.200329	0.307502	0.277299	0.182391	0.154155	0.227724	0.591392
ENSG00000166265	CYYR1	cysteine and tyrosine rich 1 [Source:HGNC Symbol;Acc:HGNC:16274]	116159	-0.0982109	0.416807	0.403208	0.129074	-0.190461	0.10956	0.139524	0.365899	-0.144832	0.311279	0.455665	0.175234	-0.281927	0.0634406	0.348823	0.471515	-0.132399	0.663178	0.81999	0.0727032	-0.211369	0.384747	0.314368	0.144438	0.15404	0.0940319	0.583038
ENSG00000135974	C2orf49	chromosome 2 open reading frame 49 [Source:HGNC Symbol;Acc:HGNC:28772]	79074	-0.0983211	0.405049	0.397911	0.133278	0.222244	0.0550574	0.0961115	0.493865	-0.253634	0.0673045	0.259319	0.460548	0.0823252	0.583868	0.648866	0.085396	0.327044	0.275047	0.684849	0.202621	0.48414	0.0361598	0.0991197	0.617173	0.153723	0.0947465	0.583038
ENSG00000025156	HSF2	heat shock transcription factor 2 [Source:HGNC Symbol;Acc:HGNC:5225]	3298	-0.0243167	0.837475	0.555449	0.0548653	0.209859	0.0709739	0.109396	0.447575	-0.0891987	0.517996	0.541078	0.0996543	0.183866	0.211751	0.475869	0.243041	0.0641593	0.790986	0.840613	0.0583146	0.217934	0.255997	0.250821	0.216044	0.153715	0.0885176	0.583038
ENSG00000243335	KCTD7	potassium channel tetramerization domain containing 7 [Source:HGNC Symbol;Acc:HGNC:21957]	154881	0.117784	0.314823	0.35278	0.172842	0.300788	0.00833432	0.0377337	0.770079	0.0490686	0.724794	0.613271	0.0644499	0.222756	0.132716	0.417392	0.331212	0.337468	0.193894	0.631112	0.270478	0.400205	0.0488584	0.113042	0.558623	0.153689	0.0804017	0.583038
ENSG00000102119	EMD	emerin [Source:HGNC Symbol;Acc:HGNC:3331]	2010	-0.0710971	0.55497	0.461356	0.0911236	0.156733	0.186642	0.188587	0.265252	-0.215215	0.121478	0.315657	0.348205	-0.126129	0.400116	0.577885	0.135397	0.15003	0.600266	0.807537	0.0831111	0.473375	0.0290165	0.0905075	0.657615	0.153658	0.0889643	0.583038
ENSG00000099974	DDTL	D-dopachrome tautomerase like [Source:HGNC Symbol;Acc:HGNC:33446]	100037417	-0.0740546	0.53909	0.455039	0.0945898	-0.149569	0.208349	0.2009	0.244999	-0.120742	0.397096	0.496747	0.136534	-0.155747	0.307493	0.533811	0.177278	0.0584521	0.839046	0.848603	0.0548699	-0.357017	0.110981	0.16512	0.387102	0.153489	0.219257	0.589863
ENSG00000184178	SCFD2	sec1 family domain containing 2 [Source:HGNC Symbol;Acc:HGNC:30676]	152579	0.0207368	0.860366	0.561792	0.0535751	-0.134055	0.248646	0.221883	0.213223	-0.122902	0.376308	0.488258	0.144727	-0.15634	0.293066	0.524109	0.185387	0.427817	0.0738379	0.51259	0.473657	-0.262537	0.182342	0.211113	0.282948	0.153489	0.0964726	0.583038
ENSG00000171729	TMEM51	transmembrane protein 51 [Source:HGNC Symbol;Acc:HGNC:25488]	55092	-0.146099	0.21434	0.292117	0.239835	0.191084	0.0995643	0.13196	0.384065	-0.158881	0.25103	0.418915	0.212304	0.0900016	0.545499	0.637172	0.0932887	-0.228521	0.437616	0.760107	0.124541	0.433836	0.0565335	0.120138	0.529108	0.153462	0.226387	0.590525
ENSG00000106638	TBL2	transducin beta like 2 [Source:HGNC Symbol;Acc:HGNC:11586]	26608	-0.110031	0.339897	0.366449	0.160366	0.121468	0.286608	0.240328	0.188583	-0.160317	0.217473	0.397017	0.238158	0.0625993	0.654817	0.674074	0.0734267	0.0751022	0.805335	0.843916	0.0571831	0.31012	0.196673	0.219486	0.26761	0.153435	0.0670413	0.583038
ENSG00000155329	ZCCHC10	zinc finger CCHC-type containing 10 [Source:HGNC Symbol;Acc:HGNC:25954]	54819	-0.168585	0.159769	0.252319	0.294317	-0.073401	0.537955	0.347243	0.0948452	-0.299304	0.0275055	0.186184	0.61594	-0.184746	0.209904	0.474942	0.24465	0.156057	0.596516	0.807092	0.0838135	0.0676796	0.776489	0.459718	0.0595499	0.153428	0.287007	0.605776
ENSG00000105887	MTPN	myotrophin [Source:HGNC Symbol;Acc:HGNC:15667]	136319	0.136321	0.246652	0.313328	0.214645	0.296085	0.00983344	0.0408429	0.751429	0.114994	0.402644	0.498914	0.134456	0.209404	0.15291	0.433208	0.304112	-0.267118	0.367479	0.73292	0.15189	0.450686	0.0490475	0.113102	0.55785	0.139154	0.0221222	0.583038
ENSG00000167565	SERTAD3	SERTA domain containing 3 [Source:HGNC Symbol;Acc:HGNC:17931]	29946	0.0237592	0.844136	0.55709	0.0544685	0.296379	0.0116221	0.0441819	0.731483	-0.0571767	0.685511	0.598473	0.0691724	0.140506	0.351833	0.55537	0.15527	0.206342	0.473971	0.770182	0.113014	0.586206	0.00530995	0.0552035	0.884516	0.15335	0.188116	0.583038
ENSG00000162998	FRZB	frizzled related protein [Source:HGNC Symbol;Acc:HGNC:3959]	2487	-0.185919	0.123246	0.224001	0.343509	-0.105895	0.377046	0.281464	0.144079	-0.187633	0.18682	0.375624	0.26626	-0.216334	0.155133	0.43466	0.301363	-0.215664	0.462612	0.766174	0.116448	0.05718	0.810454	0.470538	0.0568009	0.153095	0.287098	0.605776
ENSG00000175183	CSRP2	cysteine and glycine rich protein 2 [Source:HGNC Symbol;Acc:HGNC:2470]	1466	0.175141	0.138165	0.235461	0.321792	0.188032	0.107241	0.137572	0.369967	0.0455416	0.745221	0.620201	0.0622937	0.0597686	0.690627	0.68503	0.0685128	0.61395	0.0239368	0.394591	0.691107	0.396451	0.078597	0.138355	0.460487	0.152979	0.159212	0.583038
ENSG00000131069	ACSS2	acyl-CoA synthetase short chain family member 2 [Source:HGNC Symbol;Acc:HGNC:15814]	55902	0.195375	0.100462	0.20069	0.382363	0.0462096	0.696624	0.402843	0.0677149	0.178542	0.203873	0.388197	0.250022	-0.0362106	0.811086	0.717321	0.0566281	0.275526	0.278142	0.686603	0.200556	0.0264138	0.899094	0.494366	0.0518935	0.152881	0.431891	0.655791
ENSG00000162458	FBLIM1	filamin binding LIM protein 1 [Source:HGNC Symbol;Acc:HGNC:24686]	54751	-0.221703	0.0635945	0.159128	0.467766	0.0395437	0.740415	0.417966	0.0627541	-0.235128	0.0915021	0.289242	0.402566	-0.0555586	0.712691	0.694207	0.0658222	-0.207755	0.473236	0.769598	0.113232	0.317826	0.165109	0.200712	0.303359	0.152834	0.19545	0.584142
ENSG00000241343	RPL36A	ribosomal protein L36a [Source:HGNC Symbol;Acc:HGNC:10359]	6173	-0.145942	0.227172	0.299902	0.229321	-0.0431283	0.719311	0.411354	0.0650278	-0.265199	0.0602731	0.248155	0.480953	-0.192766	0.205884	0.470286	0.248211	0.0429645	0.883683	0.857719	0.0525217	0.108662	0.64546	0.417359	0.0753843	0.15273	0.106115	0.583038
ENSG00000124067	SLC12A4	solute carrier family 12 member 4 [Source:HGNC Symbol;Acc:HGNC:10913]	6560	0.287216	0.0150086	0.0747971	0.69879	0.274616	0.0188815	0.0545611	0.667198	0.132893	0.351618	0.479389	0.155368	-0.0317573	0.835977	0.72221	0.0549676	0.641899	0.0192654	0.381327	0.726627	0.551905	0.0115415	0.0662658	0.800318	0.152711	0.156685	0.583038
ENSG00000187994	RINL	Ras and Rab interactor like [Source:HGNC Symbol;Acc:HGNC:24795]	126432	-0.120832	0.304988	0.347179	0.178109	-0.0387772	0.739996	0.417807	0.0627972	-0.193867	0.169491	0.362159	0.284566	-0.1845	0.223184	0.485683	0.233431	-0.0914256	0.750179	0.83303	0.0620361	0.106314	0.645628	0.417398	0.0753581	0.152697	0.116746	0.583038
ENSG00000133104	SPART	spartin [Source:HGNC Symbol;Acc:HGNC:18514]	23111	-0.138344	0.24606	0.312926	0.21507	0.0924285	0.434385	0.30497	0.123125	-0.148837	0.280105	0.438319	0.193132	0.0325081	0.826508	0.71953	0.0555695	-0.2329	0.393081	0.743193	0.141021	0.270779	0.212866	0.228559	0.251801	0.152686	0.213945	0.587962
ENSG00000056558	TRAF1	TNF receptor associated factor 1 [Source:HGNC Symbol;Acc:HGNC:12031]	7185	-0.0445639	0.710306	0.517244	0.0660636	0.265076	0.0235244	0.0611829	0.634978	-0.0721152	0.611646	0.574356	0.0803302	0.129004	0.395895	0.575679	0.13699	0.0383876	0.899387	0.859901	0.0518824	0.558029	0.0130401	0.0682636	0.78408	0.152606	0.65698	0.724684
ENSG00000171055	FEZ2	fasciculation and elongation protein zeta 2 [Source:HGNC Symbol;Acc:HGNC:3660]	9637	0.268499	0.0143056	0.0732839	0.705124	0.146982	0.180426	0.18537	0.271546	0.195674	0.116375	0.311555	0.356454	-0.0481841	0.720657	0.695892	0.0649109	0.127885	0.660908	0.819772	0.0730363	0.482943	0.0284497	0.09008	0.661131	0.138994	0.0329832	0.583038
ENSG00000115977	AAK1	AP2 associated kinase 1 [Source:HGNC Symbol;Acc:HGNC:19679]	22848	0.00814349	0.946054	0.584893	0.0505279	0.180467	0.127113	0.15125	0.337632	-0.0165319	0.907466	0.662892	0.0515622	0.241406	0.109785	0.395257	0.367658	0.0465039	0.877661	0.856359	0.0527923	0.0307005	0.899732	0.494541	0.0518694	0.152478	0.0870209	0.583038
ENSG00000143621	ILF2	interleukin enhancer binding factor 2 [Source:HGNC Symbol;Acc:HGNC:6037]	3608	-0.145746	0.218287	0.294585	0.236524	0.180558	0.122259	0.148299	0.345039	-0.242359	0.073929	0.266823	0.442988	0.0497783	0.73499	0.698735	0.0633489	0.140106	0.584235	0.803331	0.0861831	0.471548	0.0132616	0.068593	0.781775	0.152462	0.106996	0.583038
ENSG00000146376	ARHGAP18	Rho GTPase activating protein 18 [Source:HGNC Symbol;Acc:HGNC:21035]	93663	0.189384	0.0994907	0.199942	0.384206	0.238126	0.0354055	0.0760688	0.570184	0.169866	0.21516	0.395732	0.240113	0.188277	0.199686	0.465764	0.253861	0.163431	0.551205	0.798385	0.093116	0.329222	0.125721	0.174934	0.360581	0.152354	0.077072	0.583038
ENSG00000105639	JAK3	Janus kinase 3 [Source:HGNC Symbol;Acc:HGNC:6193]	3718	0.108177	0.357282	0.374847	0.152443	0.348562	0.0021332	0.0202182	0.885737	-0.0536513	0.698377	0.603236	0.0675394	0.211903	0.150263	0.430891	0.307443	0.379356	0.200277	0.639332	0.263959	0.46891	0.0421063	0.105134	0.587985	0.152354	0.183646	0.583038
ENSG00000205765	RIMOC1	RAB7A interacting MON1-CCZ1 complex subunit 1 [Source:HGNC Symbol;Acc:HGNC:27750]	285636	0.138827	0.235264	0.305538	0.223046	0.326681	0.0040027	0.0261789	0.840253	0.0560767	0.680736	0.597015	0.0698007	0.191333	0.187569	0.45655	0.265513	0.251905	0.357954	0.732459	0.156232	0.507994	0.013398	0.0689307	0.780366	0.152269	0.0968007	0.583038
ENSG00000156531	PHF6	PHD finger protein 6 [Source:HGNC Symbol;Acc:HGNC:18145]	84295	0.341054	0.00216059	0.028837	0.884936	0.196055	0.0799674	0.117107	0.425375	0.331093	0.0147957	0.151844	0.70665	0.083148	0.576106	0.646598	0.0869056	0.000588368	0.997981	0.870528	0.0500008	0.291646	0.1065	0.161964	0.395887	0.138286	0.00495889	0.583038
ENSG00000106105	GARS1	glycyl-tRNA synthetase 1 [Source:HGNC Symbol;Acc:HGNC:4162]	2617	0.0577006	0.631827	0.48955	0.0768948	0.235596	0.0456536	0.0868836	0.526962	-0.0384125	0.787668	0.631156	0.0584256	0.116703	0.444249	0.594994	0.120181	0.388995	0.173347	0.615448	0.293312	0.486023	0.0279114	0.0893742	0.664519	0.15202	0.248573	0.599026
ENSG00000138119	MYOF	myoferlin [Source:HGNC Symbol;Acc:HGNC:3656]	26509	-0.264158	0.0203401	0.0864024	0.656506	-0.101392	0.374253	0.280228	0.145222	-0.358066	0.00638848	0.117146	0.804424	-0.242167	0.0907303	0.379771	0.404183	0.12452	0.628867	0.812579	0.0780682	0.229254	0.262896	0.253671	0.211036	0.151946	0.227684	0.591392
ENSG00000175265	GOLGA8A	golgin A8 family member A [Source:HGNC Symbol;Acc:HGNC:31972]	23015	-0.176503	0.139393	0.23637	0.320112	0.026282	0.824998	0.443517	0.0556566	-0.182046	0.201337	0.386385	0.252337	0.0210576	0.89098	0.73615	0.0521731	-0.324331	0.233033	0.662055	0.234049	0.0404192	0.856616	0.482342	0.0538505	0.151943	0.390067	0.64317
ENSG00000198821	CD247	CD247 molecule [Source:HGNC Symbol;Acc:HGNC:1677]	919	-0.066503	0.575883	0.470457	0.08685	0.0450718	0.701692	0.404545	0.0670921	-0.121817	0.388291	0.493872	0.139924	-0.148016	0.32762	0.5435	0.16678	-0.0153545	0.956659	0.865838	0.0503473	0.446101	0.03747	0.100616	0.610434	0.151939	0.406561	0.648552
ENSG00000198286	CARD11	caspase recruitment domain family member 11 [Source:HGNC Symbol;Acc:HGNC:16393]	84433	-0.0746242	0.531366	0.451991	0.0963485	0.0578105	0.6242	0.378887	0.0781339	-0.221156	0.110022	0.306477	0.367245	-0.195593	0.18862	0.457179	0.264468	0.0432808	0.88502	0.857862	0.0524636	0.411204	0.0748743	0.135303	0.470723	0.151808	0.230902	0.59418
ENSG00000173511	VEGFB	vascular endothelial growth factor B [Source:HGNC Symbol;Acc:HGNC:12681]	7423	-0.133455	0.261114	0.32261	0.204636	0.0713988	0.544411	0.349345	0.0934064	-0.230188	0.0927622	0.291222	0.399954	-0.0837155	0.572055	0.646054	0.0877107	-0.0247886	0.935028	0.862892	0.0507818	0.25225	0.296154	0.27139	0.18912	0.151705	0.236562	0.595631
ENSG00000166986	MARS1	methionyl-tRNA synthetase 1 [Source:HGNC Symbol;Acc:HGNC:6898]	4141	0.12468	0.299503	0.344244	0.181146	0.243665	0.0386418	0.0793932	0.55555	-0.00571944	0.967922	0.676847	0.0501868	0.114891	0.449997	0.596772	0.118376	0.515744	0.0627049	0.501684	0.507786	0.47843	0.0293117	0.0908641	0.655804	0.151673	0.186078	0.583038
ENSG00000067829	IDH3G	isocitrate dehydrogenase (NAD(+)) 3 non-catalytic subunit gamma [Source:HGNC Symbol;Acc:HGNC:5386]	3421	0.233655	0.045186	0.134038	0.528752	0.114243	0.3264	0.259089	0.166919	0.124432	0.365638	0.483439	0.149198	-0.105614	0.474211	0.607323	0.111177	0.516898	0.0564574	0.486049	0.529384	0.510305	0.0161847	0.0729009	0.753313	0.137819	0.0165944	0.583038
ENSG00000122870	BICC1	BicC family RNA binding protein 1 [Source:HGNC Symbol;Acc:HGNC:19351]	80114	-0.223765	0.0555735	0.149081	0.492191	0.147605	0.204427	0.198858	0.248475	-0.289416	0.0346446	0.203754	0.578354	0.043373	0.771411	0.708634	0.0598121	0.025585	0.931133	0.862457	0.0508787	0.44689	0.0479863	0.112219	0.562219	0.151568	0.184615	0.583038
ENSG00000163466	ARPC2	actin related protein 2/3 complex subunit 2 [Source:HGNC Symbol;Acc:HGNC:705]	10109	0.0812608	0.485785	0.434023	0.107775	0.303423	0.00734844	0.0353167	0.783555	0.0337855	0.799298	0.634429	0.0575038	0.165704	0.242253	0.498122	0.218643	0.0111762	0.969476	0.868435	0.0501722	0.542054	0.0119902	0.0667457	0.795334	0.151566	0.0550295	0.583038
ENSG00000237172	B3GNT9	UDP-GlcNAc:betaGal beta-1,3-N-acetylglucosaminyltransferase 9 [Source:HGNC Symbol;Acc:HGNC:28714]	84752	-0.160142	0.176828	0.266847	0.275299	0.0534613	0.650077	0.388069	0.0740708	-0.218739	0.119764	0.314035	0.350938	-0.063665	0.675277	0.680377	0.0705337	-0.143251	0.630402	0.812579	0.0778126	0.322724	0.168736	0.202364	0.298867	0.151564	0.0565729	0.583038
ENSG00000196305	IARS1	isoleucyl-tRNA synthetase 1 [Source:HGNC Symbol;Acc:HGNC:5330]	3376	-0.0384261	0.749247	0.530292	0.0618649	0.174744	0.139449	0.160184	0.320036	-0.0734496	0.602438	0.571967	0.0819526	0.110035	0.466082	0.603758	0.113523	0.0719116	0.798377	0.842001	0.0577206	0.30028	0.174945	0.206864	0.291426	0.151513	0.145255	0.583038
ENSG00000179361	ARID3B	AT-rich interaction domain 3B [Source:HGNC Symbol;Acc:HGNC:14350]	10620	-0.010756	0.927916	0.579322	0.050944	0.254354	0.0283977	0.067353	0.605904	-0.115693	0.408354	0.502299	0.132362	0.122403	0.41441	0.583649	0.130191	0.1672	0.587565	0.804978	0.0855298	0.501854	0.0320277	0.0940103	0.639742	0.15133	0.115245	0.583038
ENSG00000109084	TMEM97	transmembrane protein 97 [Source:HGNC Symbol;Acc:HGNC:28106]	27346	-0.1066	0.372119	0.38227	0.146104	-0.105325	0.372751	0.279702	0.145842	-0.154468	0.273089	0.433969	0.19752	-0.282925	0.0587543	0.342692	0.485633	0.0667287	0.798609	0.842001	0.0577023	-0.0225318	0.914987	0.499009	0.0513412	0.151317	0.482619	0.67031
ENSG00000113387	SUB1	SUB1 regulator of transcription [Source:HGNC Symbol;Acc:HGNC:19985]	10923	0.168325	0.149653	0.244	0.30666	0.179129	0.120857	0.147422	0.347233	0.0148801	0.915206	0.664372	0.0513106	0.0314542	0.83364	0.721838	0.0551128	0.517193	0.0593189	0.494737	0.519245	0.292916	0.197117	0.219769	0.267155	0.151283	0.0693457	0.583038
ENSG00000258289	CHURC1	churchill domain containing 1 [Source:HGNC Symbol;Acc:HGNC:20099]	91612	0.0111657	0.924928	0.578327	0.0510241	-0.102781	0.379613	0.282558	0.14304	-0.0141799	0.917395	0.664533	0.0512435	-0.195087	0.180073	0.451901	0.273154	-0.022911	0.93963	0.863275	0.0506747	-0.0643809	0.791671	0.463995	0.0582585	0.137611	0.0375419	0.583038
ENSG00000176658	MYO1D	myosin ID [Source:HGNC Symbol;Acc:HGNC:7598]	4642	-0.0898522	0.442077	0.415661	0.120641	0.223864	0.0507666	0.0921045	0.508323	-0.13101	0.327909	0.465076	0.166636	0.13295	0.354424	0.556486	0.154104	0.0461954	0.875051	0.85631	0.0529141	0.546206	0.0118381	0.066613	0.797012	0.151152	0.156682	0.583038
ENSG00000175793	SFN	stratifin [Source:HGNC Symbol;Acc:HGNC:10773]	2810	0.245549	0.0300431	0.10651	0.596948	0.132576	0.240821	0.217383	0.218887	0.224706	0.101747	0.299503	0.382255	0.112909	0.446567	0.595061	0.119448	0.326701	0.174168	0.616368	0.292341	0.0491791	0.804672	0.468832	0.0572334	0.151124	0.561781	0.69485
ENSG00000121741	ZMYM2	zinc finger MYM-type containing 2 [Source:HGNC Symbol;Acc:HGNC:12989]	7750	0.0973949	0.413929	0.402084	0.130086	0.149064	0.20507	0.199258	0.2479	0.0332986	0.814933	0.638055	0.0563548	0.0993672	0.513968	0.625577	0.10064	0.0549329	0.85513	0.853114	0.0539318	0.148065	0.539722	0.378161	0.0957301	0.151123	0.104407	0.583038
ENSG00000091409	ITGA6	integrin subunit alpha 6 [Source:HGNC Symbol;Acc:HGNC:6142]	3655	0.273366	0.0159523	0.0770639	0.690604	0.207956	0.0656864	0.104621	0.46184	0.247511	0.0701356	0.261001	0.452862	0.173122	0.240612	0.497511	0.21986	0.0579722	0.810559	0.844845	0.0567931	0.148705	0.442319	0.339608	0.122959	0.151115	0.152871	0.583038
ENSG00000123106	CCDC91	coiled-coil domain containing 91 [Source:HGNC Symbol;Acc:HGNC:24855]	55297	-0.013183	0.912212	0.575195	0.0514023	0.156619	0.183356	0.1869	0.268549	-0.134144	0.343257	0.474427	0.159217	0.0551566	0.716939	0.695275	0.0653323	0.209591	0.487535	0.775006	0.109099	0.353954	0.136214	0.181266	0.343615	0.151035	0.124595	0.583038
ENSG00000163513	TGFBR2	transforming growth factor beta receptor 2 [Source:HGNC Symbol;Acc:HGNC:11773]	7048	-0.0151249	0.900112	0.571975	0.0518182	0.104868	0.378014	0.281909	0.143686	-0.086722	0.543718	0.550205	0.0936822	-0.0312305	0.838526	0.722252	0.0548118	-0.0224925	0.940243	0.863275	0.050661	0.359894	0.124051	0.174014	0.363419	0.150958	0.0668206	0.583038
ENSG00000110237	ARHGEF17	Rho guanine nucleotide exchange factor 17 [Source:HGNC Symbol;Acc:HGNC:21726]	9828	-0.059366	0.607126	0.482584	0.0810389	0.016165	0.88754	0.462864	0.0523087	-0.102683	0.451209	0.516418	0.118001	0.0403599	0.782706	0.71082	0.0588366	0.0156532	0.955045	0.865421	0.0503737	-0.137579	0.536757	0.376982	0.0964232	0.15089	0.161616	0.583038
ENSG00000223482	NUTM2A-AS1	NUTM2A antisense RNA 1 [Source:HGNC Symbol;Acc:HGNC:45161]	728190	0.0563375	0.639378	0.492256	0.0757025	0.0624939	0.599269	0.370086	0.0824386	-0.0613505	0.659638	0.591186	0.072724	0.0326859	0.826792	0.71953	0.0555509	0.25078	0.382449	0.738819	0.1454	-0.156459	0.501135	0.363893	0.105364	0.150868	0.149824	0.583038
ENSG00000071967	CYBRD1	cytochrome b reductase 1 [Source:HGNC Symbol;Acc:HGNC:20797]	79901	0.00137358	0.990833	0.595181	0.0500152	0.0997171	0.398232	0.290402	0.135801	-0.0107725	0.939162	0.670996	0.0506731	0.0540564	0.720695	0.695892	0.0649066	0.0124956	0.966542	0.867456	0.0502069	0.224185	0.34458	0.295966	0.162625	0.150714	0.270665	0.602964
ENSG00000095015	MAP3K1	mitogen-activated protein kinase kinase kinase 1 [Source:HGNC Symbol;Acc:HGNC:6848]	4214	-0.0603992	0.611746	0.484605	0.0802347	0.349028	0.00236302	0.0210186	0.879175	-0.196068	0.158216	0.352248	0.297618	0.13993	0.349427	0.554745	0.156364	0.13728	0.655533	0.819295	0.0738372	0.685917	0.00158845	0.0489002	0.958953	0.150713	0.111996	0.583038
ENSG00000135486	HNRNPA1	heterogeneous nuclear ribonucleoprotein A1 [Source:HGNC Symbol;Acc:HGNC:5031]	3178	-0.0703474	0.554108	0.460967	0.0913068	0.178872	0.126252	0.150686	0.338924	-0.207166	0.128444	0.322406	0.337492	0.0656388	0.655704	0.674353	0.0732964	0.35626	0.191858	0.629763	0.272611	0.384669	0.0744259	0.135091	0.471988	0.150711	0.0648441	0.583038
ENSG00000155366	RHOC	ras homolog family member C [Source:HGNC Symbol;Acc:HGNC:669]	389	0.292232	0.0127252	0.0691166	0.720192	0.160461	0.171947	0.180587	0.28053	0.235237	0.0845969	0.280185	0.417512	0.048472	0.742919	0.701862	0.0625269	0.0176951	0.942333	0.863275	0.0506155	0.136555	0.485801	0.357194	0.109588	0.13743	0.0244624	0.583038
ENSG00000151883	PARP8	poly(ADP-ribose) polymerase family member 8 [Source:HGNC Symbol;Acc:HGNC:26124]	79668	0.0606391	0.611851	0.484605	0.0802165	0.196659	0.0938593	0.127655	0.395238	0.0247974	0.861244	0.650211	0.0535372	0.0384497	0.80033	0.714969	0.0574249	-0.130599	0.658962	0.819459	0.0733243	0.455819	0.0436996	0.107275	0.580726	0.150486	0.179672	0.583038
ENSG00000095319	NUP188	nucleoporin 188 [Source:HGNC Symbol;Acc:HGNC:17859]	23511	0.0238459	0.834529	0.55481	0.0550465	0.151855	0.176568	0.183375	0.275575	-0.140219	0.287447	0.442415	0.188689	0.163435	0.246935	0.500198	0.215227	0.510777	0.0490211	0.476335	0.557958	0.12916	0.556968	0.385219	0.0918451	0.150424	0.149172	0.583038
ENSG00000173757	STAT5B	signal transducer and activator of transcription 5B [Source:HGNC Symbol;Acc:HGNC:11367]	6777	0.26934	0.0194149	0.0844618	0.663221	0.294967	0.00941255	0.0401541	0.756467	0.205635	0.144938	0.340241	0.314334	0.253878	0.0922339	0.382662	0.401045	0.285587	0.286063	0.687984	0.195407	0.322098	0.12936	0.17729	0.354533	0.150371	0.119485	0.583038
ENSG00000080608	PUM3	pumilio RNA binding family member 3 [Source:HGNC Symbol;Acc:HGNC:29676]	9933	0.00472791	0.9683	0.590243	0.0501821	0.0893723	0.446928	0.310334	0.11911	-0.130814	0.352896	0.480222	0.15479	-0.000530616	0.997204	0.757825	0.0500014	0.3793	0.0803877	0.518331	0.455723	0.207778	0.246271	0.245892	0.223408	0.150331	0.13647	0.583038
ENSG00000138686	BBS7	Bardet-Biedl syndrome 7 [Source:HGNC Symbol;Acc:HGNC:18758]	55212	-0.0263893	0.827414	0.552692	0.0554985	0.0246378	0.836996	0.447572	0.0548946	-0.0867475	0.543986	0.550407	0.0936228	-0.0273254	0.858628	0.72704	0.0536736	-0.0482412	0.862824	0.854941	0.0535201	0.0543544	0.809167	0.470277	0.0568959	0.150202	0.0915546	0.583038
ENSG00000111790	FGFR1OP2	FGFR1 oncogene partner 2 [Source:HGNC Symbol;Acc:HGNC:23098]	26127	-0.110519	0.352931	0.37285	0.154374	0.117357	0.318576	0.255782	0.17089	-0.18263	0.190115	0.377126	0.262995	-0.0561791	0.708536	0.692651	0.06631	-0.202501	0.504468	0.783838	0.104478	0.403323	0.0878325	0.147125	0.436937	0.137387	0.0154279	0.583038
ENSG00000145416	MARCHF1	membrane associated ring-CH-type finger 1 [Source:HGNC Symbol;Acc:HGNC:26077]	55016	0.0151913	0.898446	0.571765	0.0518798	0.178259	0.127612	0.151687	0.336887	-0.125833	0.366331	0.483439	0.148901	-0.00772053	0.958881	0.752329	0.0503071	0.0137819	0.961112	0.866884	0.0502796	0.31822	0.150552	0.191033	0.322574	0.150159	0.220882	0.589863
ENSG00000083845	RPS5	ribosomal protein S5 [Source:HGNC Symbol;Acc:HGNC:10426]	6193	-0.210293	0.0801502	0.178913	0.424948	-0.110251	0.356793	0.272431	0.152658	-0.306489	0.0280125	0.187679	0.613036	-0.234159	0.120661	0.406489	0.349502	-0.245294	0.369204	0.733474	0.151122	-0.0669028	0.763712	0.455723	0.0607173	0.150027	0.0508861	0.583038
ENSG00000205593	DENND6B	DENN domain containing 6B [Source:HGNC Symbol;Acc:HGNC:32690]	414918	-0.0915918	0.442616	0.416101	0.120469	0.126266	0.283931	0.239113	0.190181	-0.305064	0.025939	0.1828	0.625173	-0.0612683	0.681926	0.682249	0.0696429	0.41176	0.161753	0.600289	0.307616	0.366467	0.120151	0.171551	0.370204	0.137274	0.0417708	0.583038
ENSG00000163728	TTC14	tetratricopeptide repeat domain 14 [Source:HGNC Symbol;Acc:HGNC:24697]	151613	0.184911	0.120736	0.221212	0.347422	0.226138	0.0542169	0.0953062	0.496619	0.114906	0.421621	0.506184	0.127669	0.187608	0.219332	0.483271	0.236603	0.189054	0.478143	0.771931	0.111789	0.167265	0.435788	0.336832	0.125163	0.149669	0.0765911	0.583038
ENSG00000010379	SLC6A13	solute carrier family 6 member 13 [Source:HGNC Symbol;Acc:HGNC:11046]	6540	-0.341581	0.0036982	0.0373106	0.846672	-0.427655	0.000191784	0.00894214	0.973353	-0.253156	0.0642208	0.254005	0.469254	-0.330108	0.0234311	0.287949	0.64087	-0.301812	0.269673	0.68187	0.206281	-0.598574	0.00249227	0.0489002	0.937944	-0.264514	0.0501884	0.583038
ENSG00000071051	NCK2	NCK adaptor protein 2 [Source:HGNC Symbol;Acc:HGNC:7665]	8440	-0.132577	0.267565	0.326439	0.200392	0.223717	0.0569364	0.0975625	0.487834	-0.144243	0.303292	0.451161	0.179587	0.089141	0.553858	0.640007	0.0914752	-0.153443	0.615516	0.811101	0.0803546	0.589618	0.00871353	0.0611782	0.834555	0.149631	0.270155	0.602964
ENSG00000268471	MIR4453HG	MIR4453 host gene [Source:HGNC Symbol;Acc:HGNC:25288]	54553	-0.197299	0.0959695	0.195745	0.391032	-0.0528862	0.654314	0.389582	0.0734429	-0.352876	0.00980701	0.136262	0.758115	-0.217602	0.144088	0.425486	0.315458	-0.006883	0.980112	0.868963	0.0500731	-0.0789516	0.722427	0.443448	0.065015	0.137142	0.0103393	0.583038
ENSG00000172932	ANKRD13D	ankyrin repeat domain 13D [Source:HGNC Symbol;Acc:HGNC:27880]	338692	0.313912	0.00800889	0.0545676	0.774409	0.201108	0.0896482	0.124385	0.403907	0.152373	0.285583	0.441249	0.189803	0.0191405	0.900818	0.738681	0.0517962	0.62114	0.0178112	0.375753	0.738852	0.395361	0.0701019	0.131994	0.484557	0.149596	0.170721	0.583038
ENSG00000134744	TUT4	terminal uridylyl transferase 4 [Source:HGNC Symbol;Acc:HGNC:28981]	23318	-0.0399807	0.739849	0.527035	0.0628123	0.194912	0.0992893	0.131815	0.38459	-0.0935132	0.513399	0.538913	0.100781	0.12297	0.422217	0.586578	0.127463	0.074611	0.776987	0.837189	0.0595059	0.149406	0.479209	0.354677	0.111479	0.149494	0.106482	0.583038
ENSG00000037042	TUBG2	tubulin gamma 2 [Source:HGNC Symbol;Acc:HGNC:12419]	27175	0.326569	0.00581753	0.0467648	0.806958	0.215731	0.0688392	0.107365	0.453216	0.238422	0.0836063	0.278164	0.419749	0.125212	0.400642	0.578111	0.135201	0.689048	0.0105018	0.335028	0.812305	0.255768	0.273993	0.25919	0.203331	0.139234	0.0502152	0.583038
ENSG00000182247	UBE2E2	ubiquitin conjugating enzyme E2 E2 [Source:HGNC Symbol;Acc:HGNC:12478]	7325	-0.174916	0.137479	0.234903	0.322736	-0.00907466	0.938303	0.475662	0.0506909	-0.243571	0.0800515	0.273346	0.427984	-0.226248	0.13037	0.415833	0.334634	-0.159976	0.582302	0.802745	0.0865659	0.308903	0.178472	0.208898	0.287333	0.14944	0.333015	0.624787
ENSG00000148399	DPH7	diphthamide biosynthesis 7 [Source:HGNC Symbol;Acc:HGNC:25199]	92715	0.0847362	0.476107	0.429263	0.110451	0.174294	0.136582	0.158131	0.323979	-0.0791422	0.578416	0.563244	0.0864519	0.023859	0.875917	0.732006	0.0528215	0.507565	0.0535797	0.476582	0.540038	0.35731	0.0963939	0.153767	0.417141	0.149439	0.120687	0.583038
ENSG00000141458	NPC1	NPC intracellular cholesterol transporter 1 [Source:HGNC Symbol;Acc:HGNC:7897]	4864	0.0932242	0.418642	0.403872	0.128435	0.254663	0.0237381	0.0613971	0.633612	0.077952	0.569232	0.560537	0.0882785	0.196204	0.178838	0.450867	0.274447	0.121542	0.535496	0.792651	0.0967202	0.164134	0.294528	0.270297	0.190113	0.149427	0.181564	0.583038
ENSG00000176390	CRLF3	cytokine receptor like factor 3 [Source:HGNC Symbol;Acc:HGNC:17177]	51379	0.183394	0.11086	0.210747	0.363657	0.336504	0.00260081	0.0217927	0.872744	0.13276	0.311461	0.455665	0.175136	0.215941	0.122554	0.409825	0.34651	0.0877338	0.768127	0.836354	0.0603055	0.585639	0.00703609	0.0574867	0.857707	0.149382	0.0521875	0.583038
ENSG00000097033	SH3GLB1	SH3 domain containing GRB2 like, endophilin B1 [Source:HGNC Symbol;Acc:HGNC:10833]	51100	0.0562779	0.627351	0.488071	0.0776177	0.224256	0.0482013	0.0894072	0.517468	0.0397874	0.76495	0.625963	0.0603955	0.0965337	0.497878	0.61829	0.104724	-0.23481	0.40756	0.751687	0.135347	0.34362	0.123792	0.17391	0.363862	0.149302	0.109421	0.583038
ENSG00000198408	OGA	O-GlcNAcase [Source:HGNC Symbol;Acc:HGNC:7056]	10724	0.180852	0.132084	0.231107	0.33034	0.285317	0.0152713	0.0499945	0.696476	0.061045	0.670125	0.594361	0.0712404	0.151193	0.323435	0.541217	0.16889	0.409726	0.160736	0.600274	0.308926	0.366735	0.116998	0.169483	0.375861	0.149292	0.0818562	0.583038
ENSG00000177096	PHETA2	PH domain containing endocytic trafficking adaptor 2 [Source:HGNC Symbol;Acc:HGNC:27161]	150368	-0.0764652	0.516665	0.445848	0.0998324	0.0778322	0.504617	0.33385	0.102827	-0.0685507	0.614643	0.575569	0.079814	0.0125898	0.931311	0.744576	0.0508586	-0.0921635	0.730428	0.829853	0.0641175	0.341094	0.101038	0.157763	0.407112	0.149231	0.108508	0.583038
ENSG00000177459	ERICH5	glutamate rich 5 [Source:HGNC Symbol;Acc:HGNC:26823]	203111	0.315863	0.00749923	0.0533004	0.781423	0.119776	0.313767	0.253541	0.173397	0.236001	0.0965105	0.294728	0.392379	0.0767269	0.617508	0.659952	0.0793258	0.609335	0.0237005	0.391324	0.692784	0.119513	0.607197	0.403307	0.0818387	0.149132	0.343458	0.627579
ENSG00000123352	SPATS2	spermatogenesis associated serine rich 2 [Source:HGNC Symbol;Acc:HGNC:18650]	65244	0.00219676	0.985135	0.594355	0.05004	0.315269	0.00575921	0.0313537	0.807922	-0.0385717	0.781654	0.629416	0.058925	0.17405	0.240884	0.497511	0.219657	0.117146	0.701389	0.827019	0.0675299	0.662163	0.00232357	0.0489002	0.941682	0.149048	0.22233	0.589863
ENSG00000159592	GPBP1L1	GC-rich promoter binding protein 1 like 1 [Source:HGNC Symbol;Acc:HGNC:28843]	60313	-0.0337178	0.779596	0.540034	0.0590795	0.163761	0.16731	0.178013	0.285651	-0.223829	0.11302	0.309139	0.362077	0.0328318	0.829864	0.720877	0.055352	0.457535	0.114615	0.550968	0.38024	0.317728	0.178379	0.208898	0.28744	0.136939	0.0196574	0.583038
ENSG00000113088	GZMK	granzyme K [Source:HGNC Symbol;Acc:HGNC:4711]	3003	0.0530434	0.649234	0.495126	0.0741969	0.0697353	0.545403	0.349461	0.0931883	-0.0282627	0.839063	0.644418	0.0547793	-0.115134	0.439152	0.594096	0.121813	0.340446	0.235155	0.663225	0.232293	0.417642	0.0631125	0.126277	0.506444	0.148868	0.307583	0.614457
ENSG00000228262	LINC01320	long intergenic non-protein coding RNA 1320 [Source:HGNC Symbol;Acc:HGNC:50526]	104355287	-0.163328	0.16802	0.259968	0.284857	-0.255566	0.02792	0.0665937	0.608578	-0.177483	0.211446	0.39348	0.243305	-0.331243	0.0275625	0.298208	0.615611	-0.249504	0.379155	0.737096	0.146794	-0.23951	0.292881	0.269238	0.191127	0.14878	0.171623	0.583038
ENSG00000175264	CHST1	carbohydrate sulfotransferase 1 [Source:HGNC Symbol;Acc:HGNC:1969]	8534	0.277777	0.0149584	0.074796	0.699235	0.427082	0.000105139	0.00693425	0.982185	0.202831	0.13287	0.326786	0.330989	0.390224	0.00591248	0.233761	0.812018	0.500701	0.046441	0.46798	0.568728	0.48401	0.0140818	0.0697513	0.773432	0.148766	0.226564	0.590823
ENSG00000077092	RARB	retinoic acid receptor beta [Source:HGNC Symbol;Acc:HGNC:9865]	5915	-0.270897	0.0199879	0.0857235	0.659035	-0.150669	0.195568	0.193713	0.256615	-0.404841	0.00304282	0.097828	0.868127	-0.405936	0.00577035	0.233761	0.814357	0.0750614	0.777996	0.837189	0.0594171	0.366857	0.0742137	0.134906	0.472589	0.14874	0.376336	0.638075
ENSG00000105339	DENND3	DENN domain containing 3 [Source:HGNC Symbol;Acc:HGNC:29134]	22898	0.0627298	0.594371	0.47738	0.0833316	0.225966	0.050186	0.0914456	0.510358	-0.00213839	0.987974	0.682013	0.0500262	0.154653	0.307141	0.533811	0.17747	0.0960837	0.726438	0.828683	0.064561	0.370255	0.0815074	0.141085	0.452795	0.148721	0.31283	0.616181
ENSG00000198707	CEP290	centrosomal protein 290 [Source:HGNC Symbol;Acc:HGNC:29021]	80184	-0.107942	0.353864	0.373249	0.153957	-0.0139155	0.904071	0.467114	0.0516761	-0.180318	0.187963	0.376246	0.26512	-0.0795489	0.589884	0.6497	0.0842548	0.163556	0.542792	0.795907	0.0950204	0.0649048	0.765492	0.456518	0.0605502	0.148684	0.096098	0.583038
ENSG00000119048	UBE2B	ubiquitin conjugating enzyme E2 B [Source:HGNC Symbol;Acc:HGNC:12473]	7320	-0.00766453	0.948324	0.585011	0.0504843	0.202104	0.0814667	0.118249	0.421898	-0.092377	0.509893	0.538198	0.101652	-0.0217897	0.884857	0.734499	0.0524262	0.15673	0.533313	0.792019	0.0972374	0.497093	0.00706169	0.0574867	0.857334	0.148612	0.059317	0.583038
ENSG00000177683	THAP5	THAP domain containing 5 [Source:HGNC Symbol;Acc:HGNC:23188]	168451	0.0595248	0.62241	0.48645	0.0784299	0.273826	0.0201719	0.0559897	0.65771	-0.0105836	0.9411	0.671498	0.0506309	0.129732	0.396772	0.57639	0.136657	0.0223527	0.942421	0.863275	0.0506136	0.517599	0.0262668	0.0874708	0.675169	0.148583	0.0618095	0.583038
ENSG00000125454	SLC25A19	solute carrier family 25 member 19 [Source:HGNC Symbol;Acc:HGNC:14409]	60386	-0.0330375	0.783728	0.540819	0.0587318	0.0142399	0.904837	0.467257	0.0516493	-0.176448	0.201465	0.386385	0.252219	-0.152883	0.302778	0.532094	0.179872	0.464843	0.0516364	0.476582	0.547513	0.344485	0.0763152	0.136214	0.466706	0.14857	0.144402	0.583038
ENSG00000119640	ACYP1	acylphosphatase 1 [Source:HGNC Symbol;Acc:HGNC:179]	97	0.12868	0.264641	0.324872	0.2023	-0.0301935	0.792026	0.433636	0.0580558	0.103037	0.449273	0.515793	0.118601	0.0157462	0.914265	0.740672	0.05134	0.108934	0.716626	0.828025	0.0656858	-0.198133	0.409318	0.325369	0.13468	0.148248	0.196819	0.584142
ENSG00000204536	CCHCR1	coiled-coil alpha-helical rod protein 1 [Source:HGNC Symbol;Acc:HGNC:13930]	54535	0.119724	0.317418	0.35434	0.171489	0.153678	0.193718	0.192639	0.258369	0.195066	0.167248	0.360027	0.287086	0.0373467	0.806459	0.716376	0.0569649	-0.269449	0.361715	0.732459	0.154497	0.15398	0.520559	0.371339	0.100345	0.14817	0.122728	0.583038
ENSG00000214026	MRPL23	mitochondrial ribosomal protein L23 [Source:HGNC Symbol;Acc:HGNC:10322]	6150	-0.290976	0.0121446	0.0677195	0.726049	-0.208472	0.0717462	0.109971	0.445572	-0.268054	0.0450651	0.224918	0.533255	-0.208971	0.147839	0.429093	0.310547	-0.24851	0.371892	0.733828	0.149936	-0.366192	0.0932019	0.151036	0.424314	0.148129	0.444931	0.659644
ENSG00000169446	MMGT1	membrane magnesium transporter 1 [Source:HGNC Symbol;Acc:HGNC:28100]	93380	-0.0260159	0.826852	0.552526	0.0555351	0.131892	0.260696	0.22851	0.204915	-0.0801278	0.561569	0.558386	0.0898497	0.00378321	0.979623	0.755577	0.0500754	-0.122712	0.663136	0.81999	0.0727093	0.437383	0.0418406	0.104985	0.589216	0.136738	0.0417784	0.583038
ENSG00000143947	RPS27A	ribosomal protein S27a [Source:HGNC Symbol;Acc:HGNC:10417]	6233	-0.0925363	0.443657	0.416411	0.120139	-0.0882853	0.460134	0.316366	0.115077	-0.22403	0.11401	0.309852	0.360401	-0.25019	0.0993038	0.388636	0.386914	0.158269	0.592115	0.805208	0.0846502	0.0629958	0.792076	0.464099	0.0582255	0.148018	0.103013	0.583038
ENSG00000026950	BTN3A1	butyrophilin subfamily 3 member A1 [Source:HGNC Symbol;Acc:HGNC:1138]	11119	-0.0833921	0.490316	0.435102	0.106554	0.139217	0.243252	0.218754	0.217103	-0.196205	0.167584	0.360093	0.286706	-0.00336647	0.982501	0.755799	0.0500556	0.270374	0.360896	0.732459	0.154873	0.481779	0.0335511	0.0958523	0.631176	0.14801	0.23898	0.596358
ENSG00000103196	CRISPLD2	cysteine rich secretory protein LCCL domain containing 2 [Source:HGNC Symbol;Acc:HGNC:25248]	83716	-0.0166769	0.882263	0.567138	0.0525325	0.00716176	0.948745	0.478391	0.0504765	-0.0223152	0.865903	0.651757	0.0533009	-0.0134445	0.924376	0.743015	0.0510415	0.0314068	0.904773	0.859901	0.051685	0.114289	0.587812	0.3963	0.0854817	0.147951	0.282905	0.60484
ENSG00000229117	RPL41	ribosomal protein L41 [Source:HGNC Symbol;Acc:HGNC:10354]	6171	-0.169279	0.160176	0.252519	0.293838	-0.132484	0.267555	0.231464	0.200398	-0.312749	0.026439	0.184154	0.622182	-0.269484	0.0762874	0.36084	0.437079	-0.0261132	0.929375	0.862132	0.0509243	-0.0391065	0.86923	0.486181	0.0531952	0.14794	0.0901199	0.583038
ENSG00000168172	HOOK3	hook microtubule tethering protein 3 [Source:HGNC Symbol;Acc:HGNC:23576]	84376	0.0242651	0.840119	0.556044	0.0547057	0.278873	0.0172695	0.052572	0.67973	-0.0579001	0.684529	0.597972	0.0693007	0.292744	0.0519845	0.333618	0.507852	0.18239	0.540245	0.794912	0.0956086	0.243459	0.306081	0.276486	0.183214	0.147921	0.157437	0.583038
ENSG00000108799	EZH1	enhancer of zeste 1 polycomb repressive complex 2 subunit [Source:HGNC Symbol;Acc:HGNC:3526]	2145	0.111955	0.350468	0.371843	0.155482	0.313628	0.00711442	0.03477	0.786921	0.0353979	0.801067	0.634985	0.0573687	0.184361	0.218213	0.482367	0.237537	0.133559	0.645508	0.817332	0.0753767	0.576857	0.00650525	0.0564718	0.86559	0.147907	0.112247	0.583038
ENSG00000166598	HSP90B1	heat shock protein 90 beta family member 1 [Source:HGNC Symbol;Acc:HGNC:12028]	7184	-0.101095	0.397688	0.394604	0.136006	0.148618	0.207736	0.200644	0.245537	-0.202189	0.149818	0.344525	0.308008	0.0277105	0.854998	0.725574	0.0538673	0.264145	0.363986	0.732832	0.153463	0.429753	0.0567819	0.12041	0.528212	0.147825	0.183733	0.583038
ENSG00000224578	HNRNPA1L3	heterogeneous nuclear ribonucleoprotein A1 like 3 [Source:HGNC Symbol;Acc:HGNC:48778]	642659	-0.195586	0.0970291	0.197046	0.388953	-0.0576322	0.623602	0.378721	0.0782325	-0.333723	0.0162737	0.156958	0.693737	-0.192289	0.203505	0.46916	0.250356	0.18827	0.472622	0.769504	0.113414	0.0641678	0.762877	0.45558	0.0607963	0.147764	0.11361	0.583038
ENSG00000129493	HEATR5A	HEAT repeat containing 5A [Source:HGNC Symbol;Acc:HGNC:20276]	25938	0.218562	0.0683795	0.164714	0.454452	0.143512	0.228893	0.211361	0.227964	0.0468024	0.742467	0.619725	0.0625729	0.112571	0.460097	0.601241	0.115296	0.570423	0.00853027	0.320823	0.836967	0.0855064	0.655984	0.421147	0.0737694	0.147699	0.295334	0.608382
ENSG00000062725	APPBP2	amyloid beta precursor protein binding protein 2 [Source:HGNC Symbol;Acc:HGNC:622]	10513	-0.0630185	0.593591	0.477219	0.0834753	0.170389	0.142626	0.162166	0.315765	-0.0474283	0.735598	0.61682	0.0632848	0.118727	0.429345	0.589133	0.125042	-0.192397	0.509636	0.78485	0.103124	0.199913	0.393561	0.318088	0.140828	0.147699	0.0924033	0.583038
ENSG00000168394	TAP1	transporter 1, ATP binding cassette subfamily B member [Source:HGNC Symbol;Acc:HGNC:43]	6890	-0.0515105	0.668153	0.502313	0.0714625	0.154027	0.193194	0.192318	0.258868	-0.137786	0.32944	0.465777	0.165874	-0.0309755	0.83846	0.722252	0.0548158	0.140845	0.631807	0.813243	0.0775801	0.541791	0.0130576	0.0682636	0.783898	0.147617	0.399154	0.646434
ENSG00000001630	CYP51A1	cytochrome P450 family 51 subfamily A member 1 [Source:HGNC Symbol;Acc:HGNC:2649]	1595	0.105926	0.369396	0.380867	0.147239	0.0821401	0.482104	0.325397	0.108782	0.0996258	0.486107	0.527948	0.107865	-0.0546636	0.721758	0.69595	0.0647874	0.196955	0.439401	0.76086	0.123937	0.153428	0.455386	0.344627	0.11871	0.147568	0.406717	0.648552
ENSG00000070081	NUCB2	nucleobindin 2 [Source:HGNC Symbol;Acc:HGNC:8044]	4925	-0.134541	0.252373	0.317271	0.210601	0.161189	0.164984	0.176611	0.288278	-0.230317	0.0955502	0.293262	0.394292	0.0359682	0.810033	0.717085	0.0567039	0.162886	0.54747	0.797378	0.0939544	0.556445	0.00463454	0.0538128	0.896045	0.147466	0.200305	0.584142
ENSG00000081721	DUSP12	dual specificity phosphatase 12 [Source:HGNC Symbol;Acc:HGNC:3067]	11266	-0.0706034	0.55506	0.461377	0.0911046	-0.00670914	0.954838	0.479878	0.0503698	-0.126207	0.36479	0.483439	0.149561	-0.182942	0.219071	0.483254	0.236821	-0.0331139	0.894801	0.859064	0.0520592	0.224421	0.257864	0.251271	0.214671	0.147206	0.0626777	0.583038
ENSG00000240583	AQP1	aquaporin 1 (Colton blood group) [Source:HGNC Symbol;Acc:HGNC:633]	358	-0.159279	0.1853	0.273189	0.266591	-0.176725	0.136899	0.158237	0.323539	-0.157296	0.267687	0.430184	0.200998	-0.168708	0.26731	0.513165	0.201244	-0.220545	0.454054	0.764471	0.119134	-0.219249	0.354003	0.301062	0.158083	0.147135	0.444654	0.659644
ENSG00000177432	NAP1L5	nucleosome assembly protein 1 like 5 [Source:HGNC Symbol;Acc:HGNC:19968]	266812	-0.143634	0.228489	0.300763	0.228282	0.00451043	0.969634	0.482668	0.0501671	-0.20203	0.131747	0.326328	0.332618	-0.1281	0.375233	0.566432	0.145169	0.132874	0.63837	0.813913	0.0765101	0.251514	0.262935	0.253671	0.211008	0.147039	0.210912	0.587962
ENSG00000130827	PLXNA3	plexin A3 [Source:HGNC Symbol;Acc:HGNC:9101]	55558	0.0296061	0.803893	0.54625	0.05714	0.232841	0.0459523	0.0872787	0.525826	-0.0248236	0.857913	0.649429	0.0537113	0.124386	0.401347	0.578111	0.134938	0.13643	0.636425	0.813913	0.0768244	0.318201	0.161121	0.198382	0.308429	0.146928	0.195757	0.584142
ENSG00000145782	ATG12	autophagy related 12 [Source:HGNC Symbol;Acc:HGNC:588]	9140	0.107021	0.359082	0.375793	0.151654	0.173996	0.130209	0.153542	0.333057	0.0335581	0.807765	0.636469	0.0568689	0.0845372	0.56698	0.64389	0.0887358	0.307096	0.298955	0.694427	0.187426	0.267143	0.2613	0.253026	0.212179	0.136298	0.0279984	0.583038
ENSG00000213923	CSNK1E	casein kinase 1 epsilon [Source:HGNC Symbol;Acc:HGNC:2453]	1454	-0.153849	0.196046	0.280466	0.256165	0.174114	0.138571	0.159532	0.321234	-0.202141	0.140855	0.335977	0.319802	0.0947183	0.522461	0.628508	0.0985778	-0.144923	0.62979	0.812579	0.0779144	0.337602	0.153122	0.192498	0.319036	0.146819	0.16162	0.583038
ENSG00000148337	CIZ1	CDKN1A interacting zinc finger protein 1 [Source:HGNC Symbol;Acc:HGNC:16744]	25792	0.166192	0.150123	0.244486	0.306067	0.201969	0.0762159	0.113893	0.434345	0.0850785	0.533452	0.546206	0.096	0.139526	0.339651	0.549552	0.160917	0.403817	0.0916307	0.529732	0.427933	0.255702	0.192447	0.216826	0.271992	0.146794	0.0784054	0.583038
ENSG00000197021	EOLA2	endothelium and lymphocyte associated ASCH domain 2 [Source:HGNC Symbol;Acc:HGNC:17402]	541578	-0.151532	0.204265	0.28639	0.248621	0.0277168	0.815237	0.441022	0.0563198	-0.279345	0.0421028	0.221359	0.545133	-0.182164	0.220787	0.483779	0.235398	0.342012	0.203951	0.642171	0.260318	0.516837	0.0109064	0.0652078	0.807564	0.146789	0.170225	0.583038
ENSG00000109103	UNC119	unc-119 lipid binding chaperone [Source:HGNC Symbol;Acc:HGNC:12565]	9094	0.171455	0.138631	0.235703	0.321152	0.373819	0.000817936	0.0144935	0.933927	0.127495	0.360395	0.481409	0.151464	0.32487	0.0272329	0.298208	0.617518	0.0870623	0.725001	0.828553	0.0647227	0.505384	0.00478839	0.0538128	0.89336	0.146748	0.275176	0.603974
ENSG00000173918	C1QTNF1	C1q and TNF related 1 [Source:HGNC Symbol;Acc:HGNC:14324]	114897	-0.084323	0.472594	0.427552	0.111446	0.176166	0.127384	0.151509	0.337228	-0.150395	0.282431	0.439735	0.191709	0.142266	0.343222	0.552111	0.159233	-0.0587636	0.8334	0.847875	0.0552242	0.286146	0.193535	0.217441	0.270853	0.146746	0.335249	0.624787
ENSG00000082014	SMARCD3	SWI/SNF related, matrix associated, actin dependent regulator of chromatin, subfamily d, member 3 [Source:HGNC Symbol;Acc:HGNC:11108]	6604	-0.0602455	0.618556	0.486117	0.0790739	0.169626	0.154417	0.169605	0.30074	-0.202213	0.154814	0.349846	0.301755	0.0652682	0.67048	0.678304	0.0711912	0.351558	0.201992	0.642171	0.262249	0.390115	0.0726005	0.13376	0.47721	0.146729	0.261988	0.601662
ENSG00000163479	SSR2	signal sequence receptor subunit 2 [Source:HGNC Symbol;Acc:HGNC:11324]	6746	-0.158104	0.183803	0.272117	0.268097	0.13661	0.246283	0.220489	0.21491	-0.222091	0.106008	0.30231	0.374383	0.00916086	0.950884	0.7503	0.0504384	0.0227239	0.93775	0.863275	0.0507175	0.480502	0.0285292	0.09013	0.660635	0.146619	0.0965445	0.583038
ENSG00000111676	ATN1	atrophin 1 [Source:HGNC Symbol;Acc:HGNC:3033]	1822	-0.13417	0.26245	0.323147	0.203746	0.0895932	0.45031	0.311751	0.118059	-0.189077	0.176903	0.367931	0.276493	-0.0642523	0.670472	0.678304	0.0711924	-0.159948	0.597766	0.807092	0.0835782	0.307233	0.200088	0.221176	0.264149	0.146618	0.142273	0.583038
ENSG00000138115	CYP2C8	cytochrome P450 family 2 subfamily C member 8 [Source:HGNC Symbol;Acc:HGNC:2622]	1558	-0.353628	0.00250418	0.031289	0.875317	-0.36782	0.00143752	0.0170733	0.908323	-0.21983	0.115617	0.311132	0.357712	-0.207318	0.167089	0.443778	0.287265	-0.604225	0.0250724	0.398725	0.683209	-0.56754	0.00718274	0.0577862	0.85558	-0.530597	0.052329	0.583038
ENSG00000125841	NRSN2	neurensin 2 [Source:HGNC Symbol;Acc:HGNC:16229]	80023	-0.00979579	0.935236	0.581734	0.0507615	0.185523	0.117277	0.144792	0.352954	-0.148609	0.296461	0.446228	0.183432	0.0861958	0.573172	0.646233	0.0874874	0.477284	0.0998372	0.537859	0.40966	0.393273	0.092089	0.149837	0.426871	0.146555	0.150973	0.583038
ENSG00000151148	UBE3B	ubiquitin protein ligase E3B [Source:HGNC Symbol;Acc:HGNC:13478]	89910	0.244555	0.0360881	0.118278	0.567011	0.00120326	0.991786	0.488802	0.0500122	0.242912	0.0788948	0.27147	0.430736	0.00454242	0.975827	0.754742	0.0501061	0.130554	0.622661	0.811882	0.0791166	-0.00255815	0.990493	0.517504	0.0500167	0.135835	0.0403838	0.583038
ENSG00000134480	CCNH	cyclin H [Source:HGNC Symbol;Acc:HGNC:1594]	902	-0.0756376	0.531742	0.452201	0.0962617	0.0168546	0.888106	0.462864	0.0522854	-0.165429	0.240741	0.412332	0.219764	-0.199715	0.185704	0.455359	0.267381	-0.0256363	0.933914	0.862457	0.0508089	0.236729	0.336033	0.29162	0.166903	0.135307	0.0444122	0.583038
ENSG00000120254	MTHFD1L	methylenetetrahydrofolate dehydrogenase (NADP+ dependent) 1 like [Source:HGNC Symbol;Acc:HGNC:21055]	25902	-0.106559	0.373531	0.382808	0.145519	0.109972	0.353175	0.270777	0.154265	-0.181274	0.188598	0.37627	0.26449	-0.0484017	0.744775	0.7022	0.0623386	0.147555	0.569372	0.800718	0.0891988	0.542241	0.00377113	0.0530764	0.911838	0.146343	0.202745	0.584142
ENSG00000135596	MICAL1	microtubule associated monooxygenase, calponin and LIM domain containing 1 [Source:HGNC Symbol;Acc:HGNC:20619]	64780	0.220654	0.065533	0.161735	0.462269	0.334165	0.00427838	0.0270042	0.834684	0.0598032	0.67392	0.595263	0.0707185	0.155406	0.305994	0.533811	0.178097	0.612284	0.0202012	0.383874	0.719079	0.48559	0.0227443	0.0820074	0.699689	0.146305	0.126253	0.583038
ENSG00000144674	GOLGA4	golgin A4 [Source:HGNC Symbol;Acc:HGNC:4427]	2803	-0.0483572	0.687006	0.509714	0.068933	0.169421	0.15143	0.167809	0.304429	-0.129773	0.355114	0.480438	0.153796	0.0921062	0.541018	0.635264	0.0942836	0.151759	0.614353	0.810944	0.0805593	0.34849	0.140385	0.184342	0.337255	0.146295	0.159173	0.583038
ENSG00000042088	TDP1	tyrosyl-DNA phosphodiesterase 1 [Source:HGNC Symbol;Acc:HGNC:18884]	55775	0.186184	0.107784	0.207082	0.369007	0.351381	0.00174607	0.0186602	0.89772	0.104858	0.449221	0.515793	0.118618	0.169044	0.253676	0.50391	0.210446	0.459688	0.119844	0.555022	0.370749	0.830749	1.86413e-05	0.0337715	0.999915	0.146285	0.0858871	0.583038
ENSG00000010244	ZNF207	zinc finger protein 207 [Source:HGNC Symbol;Acc:HGNC:12998]	7756	-0.0854281	0.463682	0.423839	0.114026	0.206967	0.0705534	0.109012	0.448674	-0.145924	0.285808	0.441357	0.189668	0.0903574	0.538615	0.634446	0.0948237	-0.0842526	0.747571	0.83303	0.0623002	0.469309	0.0161096	0.0728425	0.754003	0.1351	0.0477662	0.583038
ENSG00000175130	MARCKSL1	MARCKS like 1 [Source:HGNC Symbol;Acc:HGNC:7142]	65108	0.123354	0.300715	0.344938	0.180469	0.230808	0.0485122	0.0896479	0.516338	0.0819457	0.563775	0.558502	0.089393	0.16745	0.269439	0.513333	0.19986	0.199021	0.475098	0.770618	0.112681	0.275258	0.213859	0.228955	0.250879	0.146073	0.148689	0.583038
ENSG00000109063	MYH3	myosin heavy chain 3 [Source:HGNC Symbol;Acc:HGNC:7573]	4621	0.150044	0.210906	0.290004	0.242775	0.230417	0.0506677	0.0919755	0.508668	0.00890398	0.948125	0.672799	0.0504891	0.059831	0.683139	0.6823	0.069483	0.526887	0.067963	0.505197	0.491038	0.34752	0.141956	0.185118	0.334912	0.146071	0.240479	0.597149
ENSG00000020633	RUNX3	RUNX family transcription factor 3 [Source:HGNC Symbol;Acc:HGNC:10473]	864	-0.0965548	0.407317	0.398911	0.132452	0.106613	0.354842	0.271264	0.153522	-0.119513	0.385595	0.492753	0.140985	-0.0876332	0.553372	0.639835	0.0915792	-0.226049	0.436228	0.760107	0.125013	0.435487	0.0518014	0.115232	0.546869	0.146036	0.420864	0.653051
ENSG00000150760	DOCK1	dedicator of cytokinesis 1 [Source:HGNC Symbol;Acc:HGNC:2987]	1793	0.261198	0.0261395	0.0987962	0.618865	0.218439	0.0611401	0.100968	0.474941	0.231108	0.0948436	0.29245	0.395712	0.291169	0.0486262	0.330241	0.519803	0.46199	0.0835854	0.520801	0.447459	0.114617	0.60854	0.403914	0.081596	0.145934	0.11281	0.583038
ENSG00000183340	JRKL	JRK like [Source:HGNC Symbol;Acc:HGNC:6200]	8690	-0.096221	0.415142	0.40269	0.129658	0.141362	0.225199	0.209808	0.230891	-0.209098	0.129594	0.323276	0.335781	0.016182	0.913597	0.740604	0.051361	0.20882	0.457917	0.765243	0.117911	0.365348	0.0966311	0.153905	0.416617	0.145844	0.0923883	0.583038
ENSG00000083814	ZNF671	zinc finger protein 671 [Source:HGNC Symbol;Acc:HGNC:26279]	79891	-0.0468335	0.689537	0.510317	0.0686078	0.0155745	0.893224	0.464081	0.0520795	-0.123842	0.370585	0.485947	0.147101	-0.235381	0.109917	0.395257	0.367427	-0.094702	0.695041	0.824794	0.0683341	0.296754	0.115427	0.168299	0.378737	0.145833	0.0738806	0.583038
ENSG00000156042	CFAP70	cilia and flagella associated protein 70 [Source:HGNC Symbol;Acc:HGNC:30726]	118491	-0.198601	0.0883365	0.187551	0.406685	-0.14976	0.195501	0.193713	0.256679	-0.315819	0.022045	0.173289	0.650087	-0.367285	0.0126425	0.24259	0.727158	0.0435769	0.880413	0.857139	0.0526669	0.133176	0.566894	0.388753	0.0897179	0.145818	0.091474	0.583038
ENSG00000117569	PTBP2	polypyrimidine tract binding protein 2 [Source:HGNC Symbol;Acc:HGNC:17662]	58155	-0.218591	0.0671964	0.163305	0.457665	0.0105261	0.929675	0.473947	0.0508983	-0.358456	0.00908487	0.133059	0.76692	-0.0181875	0.904187	0.739681	0.0516755	0.0543218	0.843805	0.85029	0.0545814	-0.0254837	0.908783	0.497398	0.0515453	0.14573	0.139027	0.583038
ENSG00000020426	MNAT1	MNAT1 component of CDK activating kinase [Source:HGNC Symbol;Acc:HGNC:7181]	4331	-0.100007	0.401542	0.396379	0.134568	0.0343696	0.771134	0.427738	0.0598149	-0.169566	0.227748	0.403389	0.229758	-0.0131346	0.930911	0.744399	0.0508687	0.207817	0.429266	0.758749	0.127419	0.204296	0.333117	0.290315	0.168399	0.145615	0.120196	0.583038
ENSG00000076067	RBMS2	RNA binding motif single stranded interacting protein 2 [Source:HGNC Symbol;Acc:HGNC:9909]	5939	-0.0396621	0.742295	0.528151	0.0625619	0.133666	0.261124	0.228705	0.204629	-0.117772	0.408577	0.502299	0.132282	-0.0939711	0.538852	0.634624	0.0947703	0.0333186	0.913917	0.860059	0.0513754	0.524535	0.0233757	0.0829648	0.695107	0.145557	0.134928	0.583038
ENSG00000091039	OSBPL8	oxysterol binding protein like 8 [Source:HGNC Symbol;Acc:HGNC:16396]	114882	-0.00397734	0.973493	0.591796	0.0501273	0.278966	0.0166689	0.0517857	0.684613	-0.020739	0.882973	0.656479	0.052507	0.184024	0.220323	0.483676	0.235781	0.0541435	0.860417	0.854421	0.0536463	0.568893	0.0125006	0.0674526	0.789795	0.145538	0.149967	0.583038
ENSG00000115762	PLEKHB2	pleckstrin homology domain containing B2 [Source:HGNC Symbol;Acc:HGNC:19236]	55041	0.00573723	0.961573	0.588385	0.0502676	0.200908	0.0855019	0.121221	0.412824	0.048117	0.731199	0.61495	0.0637525	0.174774	0.242051	0.498097	0.218792	-0.301666	0.28196	0.687204	0.19805	0.153168	0.502462	0.364197	0.10501	0.145334	0.190166	0.583038
ENSG00000184056	VPS33B	VPS33B late endosome and lysosome associated [Source:HGNC Symbol;Acc:HGNC:12712]	26276	0.188345	0.114242	0.214338	0.357942	0.173916	0.140815	0.161056	0.318188	0.0145856	0.917292	0.664518	0.0512466	0.0539996	0.719672	0.695576	0.0650219	0.506735	0.0665946	0.502734	0.495282	0.305208	0.18014	0.2097	0.285429	0.145254	0.0914798	0.583038
ENSG00000005302	MSL3	MSL complex subunit 3 [Source:HGNC Symbol;Acc:HGNC:7370]	10943	0.0812287	0.49091	0.435321	0.106396	0.257248	0.0255315	0.063518	0.622499	0.0245823	0.8546	0.648625	0.0538889	0.136665	0.34018	0.549552	0.160667	0.252899	0.295726	0.692806	0.189381	0.512508	0.00366513	0.0525484	0.913869	0.145223	0.138346	0.583038
ENSG00000127920	GNG11	G protein subunit gamma 11 [Source:HGNC Symbol;Acc:HGNC:4403]	2791	-0.0139304	0.906731	0.573812	0.0515839	-0.00495865	0.966377	0.48224	0.0502048	-0.0232185	0.867628	0.652255	0.0532156	-0.0797494	0.592859	0.650755	0.0836995	-0.128564	0.635735	0.813913	0.0769365	0.0651008	0.766588	0.456912	0.060448	0.145203	0.282853	0.60484
ENSG00000105711	SCN1B	sodium voltage-gated channel beta subunit 1 [Source:HGNC Symbol;Acc:HGNC:10586]	6324	-0.113114	0.340919	0.366715	0.159885	0.101412	0.388345	0.286422	0.139581	-0.192434	0.17054	0.362636	0.2834	-0.0131378	0.930923	0.744399	0.0508684	-0.0989221	0.729004	0.829563	0.0642748	0.32729	0.143551	0.186543	0.332563	0.144994	0.287599	0.605855
ENSG00000140307	GTF2A2	general transcription factor IIA subunit 2 [Source:HGNC Symbol;Acc:HGNC:4647]	2958	0.0122655	0.917824	0.577065	0.051228	-0.012371	0.91623	0.470537	0.0512763	-0.15929	0.263765	0.426367	0.203579	-0.155735	0.308362	0.533978	0.176806	0.664847	0.00148636	0.22823	0.96149	0.112484	0.559456	0.386154	0.0913047	0.14493	0.0898674	0.583038
ENSG00000109099	PMP22	peripheral myelin protein 22 [Source:HGNC Symbol;Acc:HGNC:9118]	5376	0.139446	0.240774	0.309437	0.218921	0.0748645	0.525549	0.34288	0.0977051	0.171089	0.211845	0.393632	0.24296	-0.0975377	0.508411	0.624074	0.102024	-0.458336	0.102938	0.541313	0.403139	0.320239	0.161795	0.19859	0.307562	0.144928	0.259384	0.600847
[truncated: 10,629 more rows]
