# Supplementary material for: Global molecular landscape of early MASLD progression in human obesity
Source: eLife. 2026 Mar 23;14:RP109534. doi: 10.7554/eLife.109534 (PMC13008360; doi:10.7554/eLife.109534)
Supplement: Supplementary file 11. [file elife-109534-supp11.xlsx]

## Sheet: Sheet1
Gene stable ID	HGNC symbol	Gene description	NCBI gene (formerly Entrezgene) ID	log2FC_F0S vs F0S0	log2FC_F1S vs F0S0	log2FC_F2S vs F0S0	log2FC_F3S vs F0S0	pval_F0S vs F0S0	pval_F1S vs F0S0	pval_F2S vs F0S0	pval_F3S vs F0S0	log2FC_F1S_vs_F0S	log2FC_F2S_vs_F0S	log2FC_F3S_vs_F0S	pval_F1S vs F0S	pval_F2S vs F0S	pval_F3S vs F0S		Verified in the VA/EU cohorts	VA cohort	coef_VA	qval_VA	EU cohort	coef_EU	qval_EU
ENSG00000001629	ANKIB1	ankyrin repeat and IBR domain containing 1 [Source:HGNC Symbol;Acc:HGNC:22215]	54467	-0.00245212	0.137022	0.183443	0.406023	0.970692	0.0461107	0.00424702	0.0172835	0.139475	0.185895	0.408476	0.0656202	0.00998236	0.0164618				0.147218	0.0983587		-0.129248	0.12845
ENSG00000004399	PLXND1	plexin D1 [Source:HGNC Symbol;Acc:HGNC:9107]	23129	-0.0026458	0.017089	0.269481	0.572798	0.982899	0.890825	0.0203669	0.00512075	0.0197348	0.272127	0.575444	0.875085	0.0213693	0.00509782		*		0.311048	0.00351154		0.061724	0.306489
ENSG00000005882	PDK2	pyruvate dehydrogenase kinase 2 [Source:HGNC Symbol;Acc:HGNC:8810]	5164	0.049378	-0.259558	-0.459405	-0.759975	0.737381	0.103507	0.00229131	0.0116838	-0.308936	-0.508783	-0.809353	0.0701731	0.00195	0.00848649				-0.161065	0.0804858		-0.118941	0.150748
ENSG00000006468	ETV1	ETS variant transcription factor 1 [Source:HGNC Symbol;Acc:HGNC:3490]	2115	0.0955314	-0.215182	-0.234917	-0.25085	0.290109	0.0343328	0.00330196	0.080838	-0.310713	-0.330449	-0.346382	0.00451065	0.00029717	0.0255968				0.00531314	0.371826		-0.0352489	0.390564
ENSG00000006757	PNPLA4	patatin like phospholipase domain containing 4 [Source:HGNC Symbol;Acc:HGNC:24887]	8228	0.101843	-0.309864	-0.548147	-0.949172	0.611452	0.058367	0.000484413	0.00188147	-0.411707	-0.64999	-1.05101	0.0605115	0.00308959	0.000935372				0.142048	0.105806		-0.167283	0.0651337
ENSG00000008311	AASS	aminoadipate-semialdehyde synthase [Source:HGNC Symbol;Acc:HGNC:17366]	10157	-0.149998	-0.192509	-0.472833	-0.477326	0.185763	0.120353	0.000329396	0.000715826	-0.0425104	-0.322835	-0.327328	0.719944	0.0089876	0.0104794		*		-0.265127	0.0111652		-0.136574	0.114052
ENSG00000010379	SLC6A13	solute carrier family 6 member 13 [Source:HGNC Symbol;Acc:HGNC:11046]	6540	-0.0148104	-0.176222	-0.380229	-0.839119	0.92472	0.276046	0.0210168	6.5542e-05	-0.161412	-0.365419	-0.824309	0.329942	0.0305022	0.000100539		*		-0.368407	0.000666195		0.017685	0.443179
ENSG00000013364	MVP	major vault protein [Source:HGNC Symbol;Acc:HGNC:7531]	9961	0.0136864	0.0771769	0.278224	0.483945	0.885505	0.447696	0.012208	1.87356e-05	0.0634904	0.264537	0.470259	0.549278	0.0212673	5.15187e-05		*		0.155507	0.0871505		0.347291	0.000185747
ENSG00000013619	MAMLD1	mastermind like domain containing 1 [Source:HGNC Symbol;Acc:HGNC:2568]	10046	-0.111936	0.165772	0.284864	0.643391	0.319584	0.12841	0.0178108	0.00363646	0.277708	0.3968	0.755327	0.0108308	0.00112347	0.00146334				-0.361423	0.000825443		-0.298819	0.00152892
ENSG00000017797	RALBP1	ralA binding protein 1 [Source:HGNC Symbol;Acc:HGNC:9841]	10928	0.00291234	0.0819714	0.140313	0.1872	0.96436	0.126356	0.0127087	0.0305032	0.079059	0.1374	0.184288	0.218157	0.0395609	0.0414748				-0.0508152	0.28007		-0.198258	0.03321
ENSG00000018510	AGPS	alkylglycerone phosphate synthase [Source:HGNC Symbol;Acc:HGNC:327]	8540	0.0422212	0.116714	0.173582	0.219557	0.471092	0.129195	0.0112791	0.0186614	0.0744933	0.131361	0.177336	0.280284	0.0265952	0.0407655				0.0216338	0.339862		-0.139868	0.108066
ENSG00000043462	LCP2	lymphocyte cytosolic protein 2 [Source:HGNC Symbol;Acc:HGNC:6529]	3937	-0.330253	0.159402	0.356252	1.06229	0.063648	0.358519	0.0424095	0.000700815	0.489656	0.686505	1.39255	0.00473266	0.000139694	0.000107477		*		0.204308	0.0387425		-0.0304331	0.405596
ENSG00000049540	ELN	elastin [Source:HGNC Symbol;Acc:HGNC:3327]	2006	-0.0458689	-0.517746	-0.812495	-0.649479	0.839631	0.0191534	0.000192763	0.068981	-0.471877	-0.766626	-0.60361	0.0194007	0.000123405	0.0817119				-0.134027	0.117755		0.187446	0.0426332
ENSG00000065054	SLC9A3R2	SLC9A3 regulator 2 [Source:HGNC Symbol;Acc:HGNC:11076]	9351	-0.00114663	-0.283646	-0.331978	-0.903421	0.993315	0.0294699	0.0132992	0.000176785	-0.2825	-0.330831	-0.902274	0.0635171	0.0333843	0.000129106				-0.0520319	0.277512		-0.0899975	0.223604
ENSG00000065057	NTHL1	nth like DNA glycosylase 1 [Source:HGNC Symbol;Acc:HGNC:8028]	4913	-0.0364881	-0.34309	-0.46341	-1.1675	0.846776	0.104393	0.0147556	0.000771592	-0.306602	-0.426922	-1.13101	0.125346	0.0162817	0.00109084				-0.113052	0.153671		-0.0564557	0.323463
ENSG00000065154	OAT	ornithine aminotransferase [Source:HGNC Symbol;Acc:HGNC:8091]	4942	-0.195626	-0.205025	-0.679777	-0.75971	0.256131	0.165989	3.85599e-06	3.57317e-05	-0.00939966	-0.484152	-0.564084	0.956905	0.00483204	0.00281663		*		-0.316869	0.00299607		-0.36513	7.74269e-05
ENSG00000067177	PHKA1	phosphorylase kinase regulatory subunit alpha 1 [Source:HGNC Symbol;Acc:HGNC:8925]	5255	0.016092	-0.0325053	-0.0972903	-0.224276	0.721393	0.513725	0.0393139	0.000624944	-0.0485973	-0.113382	-0.240368	0.342057	0.0208862	0.000387462		*		-0.264815	0.0112375		-0.351733	0.00015087
ENSG00000072163	LIMS2	LIM zinc finger domain containing 2 [Source:HGNC Symbol;Acc:HGNC:16084]	55679	0.00191472	-0.156445	-0.29792	-0.875335	0.989525	0.209963	0.0178294	5.91138e-05	-0.15836	-0.299835	-0.87725	0.241245	0.0287038	6.53279e-05				-0.160777	0.0807708		0.0435496	0.364503
ENSG00000074660	SCARF1	scavenger receptor class F member 1 [Source:HGNC Symbol;Acc:HGNC:16820]	8578	-0.168414	0.128367	0.278438	0.5358	0.258098	0.28473	0.0166801	0.0476353	0.296782	0.446853	0.704215	0.0424747	0.00249933	0.0163071
ENSG00000075420	FNDC3B	fibronectin type III domain containing 3B [Source:HGNC Symbol;Acc:HGNC:24670]	64778	-0.140914	0.155218	0.188392	0.496424	0.130519	0.126069	0.0388099	0.00708644	0.296132	0.329306	0.637338	0.00926105	0.00181371	0.00158342				0.03269	0.316955		-0.0950359	0.209488
ENSG00000076944	STXBP2	syntaxin binding protein 2 [Source:HGNC Symbol;Acc:HGNC:11445]	6813	-0.056717	0.134358	0.182612	0.323705	0.442785	0.0803507	0.046393	0.00317349	0.191075	0.239329	0.380422	0.018689	0.0124455	0.00109736				0.0694818	0.240995		0.0909349	0.221049
ENSG00000077549	CAPZB	capping actin protein of muscle Z-line subunit beta [Source:HGNC Symbol;Acc:HGNC:1491]	832	0.0148227	0.0297145	0.134557	0.192994	0.766617	0.500302	0.0032584	0.00174847	0.0148918	0.119734	0.178171	0.764425	0.0195305	0.00461284		*		0.408592	0.000176042		-0.122455	0.14294
ENSG00000078369	GNB1	G protein subunit beta 1 [Source:HGNC Symbol;Acc:HGNC:4396]	2782	-0.00287062	0.0988931	0.132876	0.352983	0.964665	0.158352	0.0385834	0.000364172	0.101764	0.135747	0.355853	0.15399	0.0392736	0.000367843		*		0.324511	0.00243814		-0.145593	0.097982
ENSG00000078487	ZCWPW1	zinc finger CW-type and PWWP domain containing 1 [Source:HGNC Symbol;Acc:HGNC:23486]	55063	0.0275864	-0.0240994	-0.226197	-0.301794	0.811686	0.835633	0.0183704	0.0153943	-0.0516857	-0.253784	-0.329381	0.688993	0.0252466	0.0154289				-0.134308	0.117365		0.0898642	0.223851
ENSG00000078699	CBFA2T2	CBFA2/RUNX1 partner transcriptional co-repressor 2 [Source:HGNC Symbol;Acc:HGNC:1536]	9139	-0.0328045	0.190006	0.0987534	0.267666	0.712985	0.0100506	0.182664	0.0224622	0.22281	0.131558	0.300471	0.0223793	0.173973	0.0189265				-0.327215	0.00225097		0.0161236	0.447454
ENSG00000080815	PSEN1	presenilin 1 [Source:HGNC Symbol;Acc:HGNC:9508]	5663	-0.0128185	0.222724	0.184049	0.458808	0.872377	0.00314428	0.0400711	0.00201663	0.235542	0.196868	0.471626	0.00432993	0.0380765	0.00161716		*		0.326302	0.00231236		0.0237028	0.425961
ENSG00000082701	GSK3B	glycogen synthase kinase 3 beta [Source:HGNC Symbol;Acc:HGNC:4617]	2932	0.0571976	0.257711	0.214028	0.443266	0.513326	0.00445319	0.0255094	0.000299385	0.200514	0.15683	0.386068	0.0178713	0.0824761	0.000973161				-0.115163	0.149746		-0.232337	0.0138394
ENSG00000086062	B4GALT1	beta-1,4-galactosyltransferase 1 [Source:HGNC Symbol;Acc:HGNC:924]	2683	-0.0631831	0.192812	0.291311	0.364523	0.609231	0.148941	0.044059	0.0122323	0.255995	0.354494	0.427706	0.0591518	0.0160976	0.00479187		*		0.26861	0.0103405		-0.0070296	0.471241
ENSG00000087076	HSD17B14	hydroxysteroid 17-beta dehydrogenase 14 [Source:HGNC Symbol;Acc:HGNC:23238]	51171	-0.174033	-0.197406	-0.669884	-1.22287	0.419829	0.370527	0.00661491	0.00550947	-0.023373	-0.495851	-1.04883	0.915465	0.0412531	0.0121647		*		-0.306126	0.00401312		-0.373741	5.01116e-05
ENSG00000088854	DNAAF9	dynein axonemal assembly factor 9 [Source:HGNC Symbol;Acc:HGNC:17721]	25943	-0.0222292	0.131647	0.0868304	0.294248	0.689928	0.00850659	0.0896292	0.00809995	0.153876	0.10906	0.316477	0.00562282	0.0512512	0.00542621				0.120309	0.140459		0.0429082	0.366702
ENSG00000089847	ANKRD24	ankyrin repeat domain 24 [Source:HGNC Symbol;Acc:HGNC:29424]	170961	0.0775084	-0.00383902	-0.157598	-0.303572	0.378556	0.95981	0.00509934	8.80401e-05	-0.0813474	-0.235106	-0.38108	0.412884	0.00877542	0.000215491		*		-0.343933	0.00139546		0.0698034	0.281552
ENSG00000090447	TFAP4	transcription factor AP-4 [Source:HGNC Symbol;Acc:HGNC:11745]	7023	-0.00948047	-0.194474	-0.180658	-0.266791	0.903766	0.0309281	0.0153552	0.03264	-0.184993	-0.171177	-0.25731	0.0645445	0.0492251	0.0433254		*		-0.295873	0.00523434		-0.026467	0.417455
ENSG00000091073	DTX2	deltex E3 ubiquitin ligase 2 [Source:HGNC Symbol;Acc:HGNC:15973]	113878	0.0516495	0.176558	0.399524	0.710761	0.744284	0.21516	0.0092465	0.00355268	0.124909	0.347874	0.659112	0.438538	0.0416896	0.00627042
ENSG00000092529	CAPN3	calpain 3 [Source:HGNC Symbol;Acc:HGNC:1480]	825	-0.0384607	-0.0423548	-0.592419	-0.927539	0.880918	0.866674	0.00888314	0.00247688	-0.0038941	-0.553959	-0.889078	0.987925	0.0176845	0.00389071		*		-0.357735	0.000935265		-0.0203017	0.43586
ENSG00000095637	SORBS1	sorbin and SH3 domain containing 1 [Source:HGNC Symbol;Acc:HGNC:14565]	10580	0.136836	0.0215108	-0.23764	-0.547586	0.171095	0.823998	0.0327798	0.0148591	-0.115326	-0.374476	-0.684423	0.189347	0.00056783	0.00537008		*		-0.291487	0.00587012		-0.131574	0.123803
ENSG00000099284	MACROH2A2	macroH2A.2 histone [Source:HGNC Symbol;Acc:HGNC:14453]	55506	0.0746835	0.255047	0.355294	0.479335	0.519841	0.0242292	0.00471555	0.00186103	0.180364	0.28061	0.404651	0.0514328	0.00905183	0.00448796		*		0.198984	0.0428468		0.255463	0.0070529
ENSG00000100100	PIK3IP1	phosphoinositide-3-kinase interacting protein 1 [Source:HGNC Symbol;Acc:HGNC:24942]	113791	-0.0965385	0.303363	0.453404	0.853033	0.60304	0.0888327	0.00843291	0.00986342	0.399902	0.549942	0.949571	0.0457223	0.00521477	0.00560969		*		0.1995	0.0424427		0.238985	0.0114825
ENSG00000100116	GCAT	glycine C-acetyltransferase [Source:HGNC Symbol;Acc:HGNC:4188]	23464	-0.0489793	-0.320724	-0.483859	-1.00791	0.765349	0.0867876	0.00468485	0.0248459	-0.271744	-0.43488	-0.958932	0.115488	0.00498942	0.0303801		*		-0.23422	0.0216252		-0.0288866	0.410209
ENSG00000100139	MICALL1	MICAL like 1 [Source:HGNC Symbol;Acc:HGNC:29804]	85377	-0.00967342	0.290272	0.169536	0.335816	0.912813	0.00177574	0.154382	0.0114306	0.299946	0.179209	0.345489	0.000525439	0.115224	0.00913474				0.136256	0.114392		0.00776408	0.469554
ENSG00000100417	PMM1	phosphomannomutase 1 [Source:HGNC Symbol;Acc:HGNC:9114]	5372	-0.0835331	-0.245158	-0.37054	-0.584468	0.519094	0.0661892	0.00620113	0.00652588	-0.161625	-0.287007	-0.500935	0.167533	0.0156131	0.014158				-0.0452186	0.292143		0.0292532	0.409185
ENSG00000100600	LGMN	legumain [Source:HGNC Symbol;Acc:HGNC:9472]	5641	0.056915	0.199712	0.13897	0.30787	0.390355	0.00905942	0.0340011	0.018032	0.142797	0.0820548	0.250955	0.0393029	0.151957	0.0408359				-0.0152119	0.352638		-0.242299	0.0104467
ENSG00000100714	MTHFD1	methylenetetrahydrofolate dehydrogenase, cyclohydrolase and formyltetrahydrofolate synthetase 1 [Source:HGNC Symbol;Acc:HGNC:7432]	4522	-0.0210423	-0.295888	-0.466441	-1.00909	0.921748	0.145071	0.0170512	0.0151088	-0.274846	-0.445398	-0.988044	0.191839	0.0292383	0.0168142		*		-0.316415	0.00303242		-0.203356	0.0294807
ENSG00000100985	MMP9	matrix metallopeptidase 9 [Source:HGNC Symbol;Acc:HGNC:7176]	4318	-0.427399	0.470654	0.73651	1.27496	0.317116	0.216735	0.0306531	0.0121891	0.898053	1.16391	1.70236	0.0440923	0.005745	0.00283019		*		0.214	0.0321431		0.114642	0.16068
ENSG00000101444	AHCY	adenosylhomocysteinase [Source:HGNC Symbol;Acc:HGNC:343]	191	0.139616	-0.118332	-0.182594	-0.314744	0.167947	0.192301	0.0369434	0.027631	-0.257948	-0.32221	-0.45436	0.0171383	0.00265662	0.00470969		*		-0.123844	0.134384		-0.269867	0.00439412
ENSG00000102710	SUPT20H	SPT20 homolog, SAGA complex component [Source:HGNC Symbol;Acc:HGNC:20596]	55578	0.0639495	0.185867	0.224638	0.403183	0.37969	0.0542845	0.010464	0.00870656	0.121917	0.160688	0.339233	0.165604	0.0394321	0.0199114				-0.13921	0.110028		0.139494	0.108665
ENSG00000103150	MLYCD	malonyl-CoA decarboxylase [Source:HGNC Symbol;Acc:HGNC:7150]	23417	-0.00170307	-0.143095	-0.178537	-0.482053	0.985297	0.0901149	0.0344227	0.000415563	-0.141392	-0.176834	-0.48035	0.112985	0.0479226	0.00047226		*		-0.21836	0.0295216		-0.0883177	0.228086
ENSG00000104093	DMXL2	Dmx like 2 [Source:HGNC Symbol;Acc:HGNC:2938]	23312	-0.053974	0.238812	0.351169	0.761506	0.665178	0.0896304	0.027509	0.0015538	0.292786	0.405143	0.81548	0.0139393	0.00450156	0.00138324				0.132245	0.120701		0.0546789	0.329523
ENSG00000104537	ANXA13	annexin A13 [Source:HGNC Symbol;Acc:HGNC:536]	312	0.172445	-0.343636	-0.223696	-0.622618	0.349716	0.0463891	0.239262	0.0305844	-0.51608	-0.396141	-0.795063	0.0147632	0.0774651	0.0112211				0.297431	0.00502427		0.316744	0.000750094
ENSG00000105928	GSDME	gasdermin E [Source:HGNC Symbol;Acc:HGNC:2810]	1687	-0.0804593	0.0804209	0.302693	0.670991	0.570292	0.581314	0.0276079	0.0032109	0.16088	0.383152	0.75145	0.281246	0.0076071	0.001571				0.0796837	0.219546		0.1535	0.0849068
ENSG00000106069	CHN2	chimerin 2 [Source:HGNC Symbol;Acc:HGNC:1944]	1124	-0.0813709	-0.212498	-0.324821	-0.708118	0.50455	0.123694	0.0101658	0.0055585	-0.131127	-0.24345	-0.626747	0.332167	0.0477022	0.0105287		*		-0.383709	0.00041606		-0.344315	0.00021266
ENSG00000108039	XPNPEP1	X-prolyl aminopeptidase 1 [Source:HGNC Symbol;Acc:HGNC:12822]	7511	-0.0486335	0.0635547	0.218884	0.383174	0.622639	0.507706	0.0195178	0.0446859	0.112188	0.267517	0.431807	0.303304	0.0136432	0.0295221				0.183986	0.0556211		0.140596	0.106894
ENSG00000108830	RND2	Rho family GTPase 2 [Source:HGNC Symbol;Acc:HGNC:18315]	8153	-0.178062	-0.246898	-0.464723	-0.621823	0.193336	0.0434954	0.000459653	0.000183611	-0.0688361	-0.286661	-0.443761	0.548387	0.0198734	0.00338413		*		-0.300633	0.00462441		-0.417181	3.89934e-06
ENSG00000109576	AADAT	aminoadipate aminotransferase [Source:HGNC Symbol;Acc:HGNC:17929]	51166	-0.120349	-0.252662	-0.572887	-1.202	0.573103	0.23754	0.00772612	0.00501667	-0.132314	-0.452538	-1.08165	0.565113	0.0490203	0.0086079		*		-0.277341	0.00836841		-0.392394	1.77417e-05
ENSG00000109743	BST1	bone marrow stromal cell antigen 1 [Source:HGNC Symbol;Acc:HGNC:1118]	683	0.0738455	-0.0639096	-0.252715	-0.345581	0.544787	0.645938	0.0343945	0.0358071	-0.137755	-0.326561	-0.419427	0.31114	0.00563571	0.0136763				-0.0495886	0.282671		-0.00322362	0.481359
ENSG00000109906	ZBTB16	zinc finger and BTB domain containing 16 [Source:HGNC Symbol;Acc:HGNC:12930]	7704	-0.0137501	-0.204508	-0.613026	-0.998202	0.94608	0.321395	0.00606302	0.000942747	-0.190758	-0.599276	-0.984452	0.357438	0.00775788	0.00111625				-0.108746	0.161306		-0.171869	0.0589271
ENSG00000110031	LPXN	leupaxin [Source:HGNC Symbol;Acc:HGNC:14061]	9404	-0.182761	0.328314	0.324469	0.873582	0.275633	0.0443674	0.0354846	0.00202472	0.511075	0.50723	1.05634	0.00372353	0.00258674	0.000538716				0.116838	0.146715		0.10895	0.174251
ENSG00000110723	EXPH5	exophilin 5 [Source:HGNC Symbol;Acc:HGNC:30578]	23086	0.0199419	-0.0907575	-0.158599	-0.330998	0.823004	0.257757	0.0377354	1.15381e-05	-0.110699	-0.178541	-0.35094	0.210288	0.0371152	8.02685e-05		*		-0.250177	0.0153712		-0.30895	0.00102626
ENSG00000111700	SLCO1B3	solute carrier organic anion transporter family member 1B3 [Source:HGNC Symbol;Acc:HGNC:10961]	28234	-0.0853187	-0.222962	-0.773049	-1.61611	0.772446	0.469778	0.00859075	0.00316383	-0.137644	-0.68773	-1.53079	0.662338	0.0224359	0.00438418		*		-0.382946	0.000429389		-0.105042	0.183958
ENSG00000112033	PPARD	peroxisome proliferator activated receptor delta [Source:HGNC Symbol;Acc:HGNC:9235]	5467	-0.0364713	0.18177	0.215463	0.43362	0.778755	0.0858288	0.0422286	0.018723	0.218242	0.251934	0.470092	0.071462	0.0385399	0.014259				0.145464	0.100864		0.0423602	0.368195
ENSG00000112242	E2F3	E2F transcription factor 3 [Source:HGNC Symbol;Acc:HGNC:3115]	1871	0.0503306	0.219591	0.200251	0.573804	0.541587	0.0126692	0.0259987	0.000680469	0.169261	0.14992	0.523473	0.0419255	0.0785233	0.00140198		*		0.482668	9.33937e-06		0.233625	0.0133812
ENSG00000112685	EXOC2	exocyst complex component 2 [Source:HGNC Symbol;Acc:HGNC:24968]	55770	0.0127655	0.0623866	0.203267	0.315831	0.856721	0.443179	0.0106638	0.000393509	0.0496212	0.190502	0.303066	0.547752	0.0184113	0.0006916				0.0437931	0.294932		-0.192621	0.0377332
ENSG00000114354	TFG	trafficking from ER to golgi regulator [Source:HGNC Symbol;Acc:HGNC:11758]	10342	0.00982643	0.122363	0.179006	0.373025	0.887635	0.0804939	0.00909369	0.0109242	0.112536	0.169179	0.363199	0.126119	0.0195796	0.0123562		*		0.233647	0.0218966		-0.0347058	0.392634
ENSG00000114790	ARHGEF26	Rho guanine nucleotide exchange factor 26 [Source:HGNC Symbol;Acc:HGNC:24490]	26084	0.0901497	-0.211314	-0.39642	-0.611296	0.515219	0.0805914	0.00171056	0.00591735	-0.301463	-0.48657	-0.701446	0.0208909	0.000444913	0.00263815
ENSG00000115145	STAM2	signal transducing adaptor molecule 2 [Source:HGNC Symbol;Acc:HGNC:11358]	10254	-0.00186371	0.100916	0.141649	0.261055	0.974357	0.134387	0.0220129	0.000150744	0.10278	0.143512	0.262919	0.146412	0.0289031	0.000241176				0.0372412	0.308628		-0.106655	0.179622
ENSG00000115648	MLPH	melanophilin [Source:HGNC Symbol;Acc:HGNC:29643]	79083	0.13017	-0.222109	-0.30238	-0.615356	0.358488	0.192285	0.0199909	0.00283649	-0.352279	-0.43255	-0.745526	0.0443951	0.00176489	0.000754301		*		-0.267477	0.0106032		0.0982206	0.201207
ENSG00000115652	UXS1	UDP-glucuronate decarboxylase 1 [Source:HGNC Symbol;Acc:HGNC:17729]	80146	-0.00207277	0.183502	0.248321	0.456316	0.983648	0.0760697	0.0188947	0.0110872	0.185575	0.250394	0.458389	0.0715739	0.0177111	0.010934		*		0.356625	0.000969312		-0.0899967	0.223604
ENSG00000115841	RMDN2	regulator of microtubule dynamics 2 [Source:HGNC Symbol;Acc:HGNC:26567]	151393	-0.062099	-0.118745	-0.359351	-0.780022	0.657634	0.330467	0.00335966	0.00593858	-0.0566457	-0.297252	-0.717923	0.706083	0.0481438	0.00857905		*		-0.208117	0.0360307		-0.229197	0.0150174
ENSG00000116266	STXBP3	syntaxin binding protein 3 [Source:HGNC Symbol;Acc:HGNC:11446]	6814	0.0270322	0.102594	0.173042	0.261925	0.643369	0.0705518	0.00581005	0.00724524	0.0755618	0.146009	0.234892	0.177855	0.018476	0.0130534				0.117655	0.14528		-0.0618192	0.306184
ENSG00000116514	RNF19B	ring finger protein 19B [Source:HGNC Symbol;Acc:HGNC:26886]	127544	-0.166326	0.295048	0.322251	0.491688	0.350006	0.0444669	0.0401166	0.0676783	0.461374	0.488577	0.658014	0.0100838	0.00913999	0.0246703		*		0.337689	0.00167087		0.0278075	0.413352
ENSG00000118260	CREB1	cAMP responsive element binding protein 1 [Source:HGNC Symbol;Acc:HGNC:2345]	1385	-0.00542199	0.161198	0.281904	0.431417	0.96271	0.140022	0.0190227	0.0372837	0.16662	0.287326	0.436838	0.135336	0.0191821	0.0359353				0.0710262	0.237911		-0.120772	0.146524
ENSG00000118508	RAB32	RAB32, member RAS oncogene family [Source:HGNC Symbol;Acc:HGNC:9772]	10981	-0.0154052	0.0548518	0.201466	0.388558	0.86691	0.46953	0.00789717	0.0031937	0.0702571	0.216871	0.403963	0.452886	0.0223686	0.00304466		*		0.329797	0.00209525		0.08191	0.246031
ENSG00000119138	KLF9	KLF transcription factor 9 [Source:HGNC Symbol;Acc:HGNC:1123]	687	0.0553454	-0.136967	-0.324588	-0.658842	0.635939	0.208617	0.00699863	0.00494276	-0.192312	-0.379933	-0.714188	0.134931	0.00641297	0.00279249				0.0520849	0.277475		-0.115004	0.159864
ENSG00000120907	ADRA1A	adrenoceptor alpha 1A [Source:HGNC Symbol;Acc:HGNC:277]	148	-0.135412	-0.322302	-0.553327	-1.12983	0.477811	0.110582	0.00843187	0.00175783	-0.18689	-0.417915	-0.994421	0.362275	0.0483971	0.00385793		*		-0.304363	0.00418083		-0.233942	0.0132673
ENSG00000122641	INHBA	inhibin subunit beta A [Source:HGNC Symbol;Acc:HGNC:6066]	3624	-0.683314	0.209502	0.529073	1.08125	0.086264	0.417023	0.045524	0.00218393	0.892817	1.21239	1.76456	0.0222201	0.00287188	0.000192882				-0.0293909	0.323942		-0.151489	0.0880579
ENSG00000125520	SLC2A4RG	SLC2A4 regulator [Source:HGNC Symbol;Acc:HGNC:15930]	56731	0.0559379	-0.310258	-0.387087	-0.535164	0.704466	0.0272169	0.0158327	0.00231912	-0.366196	-0.443025	-0.591102	0.0412482	0.0227914	0.00256121				-0.166367	0.0740252		-0.0215741	0.432053
ENSG00000126838	PZP	PZP alpha-2-macroglobulin like [Source:HGNC Symbol;Acc:HGNC:9750]	5858	0.0393304	-0.183854	-0.906565	-1.74002	0.926966	0.631845	0.02242	0.0377674	-0.223185	-0.945896	-1.77935	0.607316	0.0352814	0.0360153				0.0691211	0.24172		-0.115458	0.158724
ENSG00000127831	VIL1	villin 1 [Source:HGNC Symbol;Acc:HGNC:12690]	7429	-0.271275	-0.545858	-0.868187	-1.07258	0.279286	0.0211289	9.59801e-05	0.00314109	-0.274582	-0.596912	-0.801301	0.308814	0.0203466	0.0208197				-0.0779983	0.223004		-0.100766	0.194754
ENSG00000128694	OSGEPL1	O-sialoglycoprotein endopeptidase like 1 [Source:HGNC Symbol;Acc:HGNC:23075]	64172	-0.0415431	-0.113509	-0.23554	-0.414261	0.682548	0.286158	0.0181883	0.027472	-0.0719655	-0.193997	-0.372718	0.430003	0.0188262	0.0394849		*		-0.160487	0.0811446		-0.183117	0.0468483
ENSG00000129214	SHBG	sex hormone binding globulin [Source:HGNC Symbol;Acc:HGNC:10839]	6462	-0.182128	-0.654087	-0.71211	-1.43186	0.505263	0.0241263	0.00582291	0.0269249	-0.471959	-0.529982	-1.24973	0.0951683	0.0343226	0.0448749				0.151788	0.0920122		0.256504	0.00683914
ENSG00000130222	GADD45G	growth arrest and DNA damage inducible gamma [Source:HGNC Symbol;Acc:HGNC:4097]	10912	0.0316956	-0.395535	-0.756313	-1.40857	0.899355	0.128053	0.00121167	0.00227236	-0.427231	-0.788009	-1.44027	0.119203	0.00189071	0.00193005				0.0336335	0.315546		0.0719283	0.275323
ENSG00000130227	XPO7	exportin 7 [Source:HGNC Symbol;Acc:HGNC:14108]	23039	0.0274434	0.0561873	0.172993	0.316419	0.707456	0.42645	0.00789876	0.00111195	0.028744	0.145549	0.288975	0.708937	0.0433975	0.00285383				0.0455544	0.291507		-0.151689	0.0878418
ENSG00000130508	PXDN	peroxidasin [Source:HGNC Symbol;Acc:HGNC:14966]	7837	-0.0877947	0.146921	0.332571	0.698032	0.616595	0.338601	0.0273772	0.000198058	0.234716	0.420366	0.785827	0.195084	0.020365	0.000200998				0.121315	0.138714		0.0250335	0.421536
ENSG00000131378	RFTN1	raftlin, lipid raft linker 1 [Source:HGNC Symbol;Acc:HGNC:30278]	23180	-0.0242134	0.297366	0.351691	0.409191	0.837648	0.011054	0.00285266	0.0861513	0.32158	0.375904	0.433405	0.00515363	0.00122908	0.0715488				-0.235464	0.021011		-0.240696	0.0109456
ENSG00000131910	NR0B2	nuclear receptor subfamily 0 group B member 2 [Source:HGNC Symbol;Acc:HGNC:7961]	8431	0.0899438	-0.102849	-0.652384	-1.49622	0.779509	0.730783	0.0260225	0.0190721	-0.192793	-0.742327	-1.58616	0.532064	0.0157716	0.0147498				-0.0597205	0.261122		-0.012858	0.456137
ENSG00000132003	ZSWIM4	zinc finger SWIM-type containing 4 [Source:HGNC Symbol;Acc:HGNC:25704]	65249	-0.0922114	0.250872	0.228204	0.447249	0.560335	0.0486494	0.0736168	0.000224716	0.343083	0.320415	0.539461	0.0356732	0.0495681	0.000978612
ENSG00000132570	PCBD2	pterin-4 alpha-carbinolamine dehydratase 2 [Source:HGNC Symbol;Acc:HGNC:24474]	84105	0.108827	-0.124834	-0.225321	-0.354934	0.365405	0.22389	0.0164627	0.00869693	-0.233662	-0.334148	-0.463761	0.0884253	0.0120236	0.00357819		*		-0.269278	0.0101752		-0.253274	0.00753152
ENSG00000132744	ACY3	aminoacylase 3 [Source:HGNC Symbol;Acc:HGNC:24104]	91703	0.0523279	-0.305554	-0.441874	-0.824273	0.802709	0.0996488	0.0321595	0.0279525	-0.357882	-0.494202	-0.876601	0.0979718	0.0349915	0.0227799				-0.108659	0.161455		-0.0321302	0.400708
ENSG00000133193	FAM104A	family with sequence similarity 104 member A [Source:HGNC Symbol;Acc:HGNC:25918]	84923	-0.0465133	-0.00289453	0.161842	0.350528	0.514258	0.964949	0.0318973	0.00658	0.0436188	0.208356	0.397041	0.582212	0.0183617	0.00304412				0.0809822	0.216867		0.0229465	0.427948
ENSG00000134070	IRAK2	interleukin 1 receptor associated kinase 2 [Source:HGNC Symbol;Acc:HGNC:6113]	3656	-0.0971666	0.32498	0.190531	0.495424	0.529963	0.0125302	0.218763	0.0138676	0.422147	0.287698	0.59259	0.00860458	0.107112	0.00678185				-0.0179321	0.347272		-0.105771	0.182076
ENSG00000134363	FST	follistatin [Source:HGNC Symbol;Acc:HGNC:3971]	10468	-0.0498525	0.225545	0.349678	0.732495	0.774778	0.191373	0.0378751	0.0313722	0.275398	0.39953	0.782348	0.161139	0.0391466	0.0248789				-0.103238	0.172195		0.103219	0.188312
ENSG00000135677	GNS	glucosamine (N-acetyl)-6-sulfatase [Source:HGNC Symbol;Acc:HGNC:4422]	2799	0.00467739	0.171218	0.200543	0.399774	0.953261	0.0577162	0.0251118	0.0135602	0.16654	0.195865	0.395097	0.0417918	0.0158083	0.0145024		*		0.365427	0.000735793		0.0668968	0.289691
ENSG00000135932	CAB39	calcium binding protein 39 [Source:HGNC Symbol;Acc:HGNC:20292]	51719	0.00288251	0.115472	0.0816088	0.363227	0.954308	0.0375402	0.160671	0.0002392	0.11259	0.0787263	0.360345	0.0281412	0.145392	0.000347135				-0.137973	0.111854		-0.200389	0.0315953
ENSG00000136379	ABHD17C	abhydrolase domain containing 17C, depalmitoylase [Source:HGNC Symbol;Acc:HGNC:26925]	58489	-0.0895853	0.170624	0.235637	0.646975	0.440435	0.11895	0.024727	0.000197704	0.260209	0.325222	0.73656	0.0230236	0.00354738	6.62748e-05		*		0.235068	0.0211979		0.140102	0.1077
ENSG00000136457	CHAD	chondroadherin [Source:HGNC Symbol;Acc:HGNC:1909]	1101	-0.0640072	-0.314537	-0.514653	-1.07813	0.780315	0.13681	0.0137282	0.000808541	-0.250529	-0.450646	-1.01412	0.260742	0.0412864	0.00149268		*		-0.291278	0.00590398		0.0236219	0.426102
ENSG00000136603	SKIL	SKI like proto-oncogene [Source:HGNC Symbol;Acc:HGNC:10897]	6498	-0.0303321	0.207901	0.22177	0.336153	0.778046	0.0351972	0.0320111	0.0335469	0.238233	0.252102	0.366485	0.0290062	0.0260796	0.0254355				-0.150328	0.0940684		-0.0777867	0.258306
ENSG00000136754	ABI1	abl interactor 1 [Source:HGNC Symbol;Acc:HGNC:11320]	10006	0.0131721	0.153905	0.174891	0.416651	0.859217	0.0904354	0.0304663	0.00755825	0.140733	0.161719	0.403479	0.0868911	0.0222926	0.00940977				0.157425	0.084829		-0.117828	0.153158
ENSG00000138071	ACTR2	actin related protein 2 [Source:HGNC Symbol;Acc:HGNC:169]	10097	0.0903192	0.162035	0.221888	0.417707	0.162965	0.0389454	0.00278566	0.00145132	0.0717157	0.131569	0.327388	0.304903	0.0410566	0.00677172		*		0.549498	2.97135e-07		-0.092416	0.216905
ENSG00000138835	RGS3	regulator of G protein signaling 3 [Source:HGNC Symbol;Acc:HGNC:9999]	5998	0.0368631	0.0810888	0.310138	0.623469	0.72762	0.499298	0.00637015	0.0361605	0.0442257	0.273275	0.586606	0.684415	0.00704977	0.0448319				0.169308	0.0706874		0.0909213	0.221065
ENSG00000140416	TPM1	tropomyosin 1 [Source:HGNC Symbol;Acc:HGNC:12010]	7168	-0.0702469	0.111884	0.272757	0.415711	0.490305	0.338424	0.021853	0.0309837	0.182131	0.343003	0.485958	0.0583479	0.000686867	0.0152711		*		0.0796851	0.219546		0.533084	4.66852e-10
ENSG00000141232	TOB1	transducer of ERBB2, 1 [Source:HGNC Symbol;Acc:HGNC:11979]	10140	-0.0855597	-0.2495	-0.52798	-0.8344	0.554399	0.154395	0.00238367	0.0151931	-0.163941	-0.44242	-0.74884	0.33116	0.00788227	0.0242396		*		-0.113356	0.153168		-0.194938	0.0358119
ENSG00000141293	SKAP1	src kinase associated phosphoprotein 1 [Source:HGNC Symbol;Acc:HGNC:15605]	8631	-0.0844124	-0.504298	-0.45843	-0.927095	0.666807	0.0122748	0.0199349	4.37645e-05	-0.419885	-0.374018	-0.842683	0.046056	0.069995	0.000239343				0.102146	0.174485		-0.0345217	0.393226
ENSG00000141504	SAT2	spermidine/spermine N1-acetyltransferase family member 2 [Source:HGNC Symbol;Acc:HGNC:23160]	112483	-0.0302413	-0.21901	-0.373734	-0.839317	0.842549	0.136206	0.00890567	0.000117576	-0.188769	-0.343493	-0.809076	0.202248	0.0174556	0.000191081				-0.0798977	0.219064		0.197908	0.0334671
ENSG00000142168	SOD1	superoxide dismutase 1 [Source:HGNC Symbol;Acc:HGNC:11179]	6647	-0.0257453	-0.182171	-0.314124	-0.858609	0.859707	0.173078	0.0306305	0.0337046	-0.156426	-0.288379	-0.832864	0.245125	0.0485355	0.0376832				-0.167579	0.0726564		0.0433572	0.365219
ENSG00000143257	NR1I3	nuclear receptor subfamily 1 group I member 3 [Source:HGNC Symbol;Acc:HGNC:7969]	9970	-0.0601147	-0.321722	-0.520352	-1.60427	0.780188	0.146704	0.0113354	0.0174155	-0.261607	-0.460238	-1.54415	0.24892	0.029685	0.0202192		*		-0.239152	0.0194412		0.0857229	0.235257
ENSG00000144228	SPOPL	speckle type BTB/POZ protein like [Source:HGNC Symbol;Acc:HGNC:27934]	339745	0.0225235	0.0764937	0.159729	0.358692	0.679532	0.248305	0.0118222	0.0222638	0.0539703	0.137206	0.336169	0.414553	0.0298203	0.0286701		*		0.264786	0.0112406		-0.117122	0.154707
ENSG00000144395	CCDC150	coiled-coil domain containing 150 [Source:HGNC Symbol;Acc:HGNC:26834]	284992	-0.0072792	-0.103861	-0.291266	-0.374649	0.956656	0.394398	0.00312117	0.00763217	-0.0965821	-0.283987	-0.36737	0.512858	0.0306809	0.0195941		*		-0.301894	0.00447603		0.0901248	0.223253
ENSG00000144908	ALDH1L1	aldehyde dehydrogenase 1 family member L1 [Source:HGNC Symbol;Acc:HGNC:3978]	10840	-0.0669361	-0.344547	-0.675461	-1.64494	0.809073	0.2092	0.0211376	0.00866852	-0.277611	-0.608525	-1.57801	0.324224	0.042198	0.0105396				-0.160636	0.0809653		-0.0721174	0.27469
ENSG00000145555	MYO10	myosin X [Source:HGNC Symbol;Acc:HGNC:7593]	4651	-0.140974	0.258098	0.320148	0.616897	0.425477	0.0865059	0.0461426	0.00856515	0.399072	0.461122	0.757871	0.0373383	0.0210521	0.00333491				-0.137317	0.112794		-0.075711	0.264132
ENSG00000145945	FAM50B	family with sequence similarity 50 member B [Source:HGNC Symbol;Acc:HGNC:18789]	26240	-0.0237232	-0.272707	-0.249049	-0.369431	0.781279	0.00646137	0.0151206	0.0443792	-0.248983	-0.225325	-0.345708	0.0101851	0.0232552	0.0554388		*		-0.216875	0.0304174		0.161002	0.0734211
ENSG00000147010	SH3KBP1	SH3 domain containing kinase binding protein 1 [Source:HGNC Symbol;Acc:HGNC:13867]	30011	-0.080177	0.110717	0.191014	0.481066	0.367208	0.25564	0.045041	0.0424564	0.190894	0.271191	0.561243	0.0397998	0.00311722	0.0240383		*		0.224316	0.0264309		-0.141329	0.105425
ENSG00000147576	ADHFE1	alcohol dehydrogenase iron containing 1 [Source:HGNC Symbol;Acc:HGNC:16354]	137872	0.0539448	-0.357225	-0.476745	-0.936452	0.795452	0.0576379	0.00902616	0.032415	-0.41117	-0.53069	-0.990397	0.0643776	0.015502	0.0265619		*		-0.363178	0.000789323		0.0264869	0.417416
ENSG00000150459	SAP18	Sin3A associated protein 18 [Source:HGNC Symbol;Acc:HGNC:10530]	10284	-0.0156867	-0.159646	-0.17054	-0.144391	0.791864	0.0215279	0.0171019	0.0895867	-0.143959	-0.154853	-0.128705	0.0341807	0.0270912	0.121792				0.320921	0.00268898		-0.0283613	0.411751
ENSG00000151332	MBIP	MAP3K12 binding inhibitory protein 1 [Source:HGNC Symbol;Acc:HGNC:20427]	51562	-0.119934	-0.201821	-0.281444	-0.358013	0.184449	0.0394549	0.00207583	0.00106629	-0.0818876	-0.16151	-0.238079	0.341649	0.0362817	0.0124315				0.0383424	0.306137		-0.126419	0.134318
ENSG00000151729	SLC25A4	solute carrier family 25 member 4 [Source:HGNC Symbol;Acc:HGNC:10990]	291	-0.0179059	-0.271345	-0.301516	-0.679668	0.883611	0.0135568	0.00959094	7.3824e-06	-0.253439	-0.28361	-0.661762	0.0532342	0.0374885	3.21449e-05				-0.161003	0.0805183		0.0461418	0.356141
ENSG00000152382	TADA1	transcriptional adaptor 1 [Source:HGNC Symbol;Acc:HGNC:30631]	117143	0.0155742	-0.0794282	-0.193584	-0.280598	0.853385	0.399658	0.0204856	0.00737952	-0.0950024	-0.209159	-0.296172	0.301355	0.0103243	0.0049267		*		-0.232216	0.0225555		-0.170994	0.060117
ENSG00000152782	PANK1	pantothenate kinase 1 [Source:HGNC Symbol;Acc:HGNC:8598]	53354	-0.0501071	-0.249598	-0.553846	-1.22996	0.829053	0.361567	0.0293761	0.00862038	-0.199491	-0.503739	-1.17985	0.437256	0.0329606	0.0108602				-0.154822	0.0880766		-0.12189	0.144125
ENSG00000153214	TMEM87B	transmembrane protein 87B [Source:HGNC Symbol;Acc:HGNC:25913]	84910	0.133739	0.293712	0.463826	0.619436	0.394418	0.0642192	0.00359148	0.00655501	0.159974	0.330087	0.485697	0.336087	0.0465991	0.0260848		*		0.214502	0.031831		0.0091086	0.466114
ENSG00000153395	LPCAT1	lysophosphatidylcholine acyltransferase 1 [Source:HGNC Symbol;Acc:HGNC:25718]	79888	-0.0435752	0.108623	0.258215	0.630714	0.642578	0.273967	0.0022892	0.0171176	0.152198	0.30179	0.674289	0.157839	0.00182772	0.0125194
ENSG00000153902	LGI4	leucine rich repeat LGI family member 4 [Source:HGNC Symbol;Acc:HGNC:18712]	163175	0.0642687	-0.186315	-0.330823	-0.448284	0.689624	0.173325	0.0234725	0.00146726	-0.250583	-0.395092	-0.512553	0.10619	0.0163478	0.00157937				-0.170386	0.0696094		0.184568	0.0454955
ENSG00000154556	SORBS2	sorbin and SH3 domain containing 2 [Source:HGNC Symbol;Acc:HGNC:24098]	8470	0.0139909	-0.17334	-0.391929	-1.06248	0.932501	0.268837	0.00930561	0.00406872	-0.187331	-0.40592	-1.07647	0.260061	0.0123989	0.00363884		*		-0.210355	0.034454		-0.167498	0.0647727
ENSG00000154978	VOPP1	VOPP1 WW domain binding protein [Source:HGNC Symbol;Acc:HGNC:34518]	81552	0.0122038	0.133803	0.217084	0.357735	0.906339	0.250034	0.032625	0.0254706	0.1216	0.20488	0.345531	0.302641	0.0484357	0.030452		*		0.371701	0.000597365		0.193624	0.0367978
ENSG00000155903	RASA2	RAS p21 protein activator 2 [Source:HGNC Symbol;Acc:HGNC:9872]	5922	0.0078388	0.186395	0.241831	0.461379	0.920185	0.0232663	0.00437341	0.0102261	0.178556	0.233992	0.45354	0.020896	0.00359527	0.0114004				-0.0595957	0.261385		-0.0416751	0.370463
ENSG00000157191	NECAP2	NECAP endocytosis associated 2 [Source:HGNC Symbol;Acc:HGNC:25528]	55707	-0.03727	0.138678	0.239099	0.366674	0.61384	0.0618759	0.00261046	0.00453027	0.175948	0.276369	0.403944	0.0247174	0.00100917	0.00254392
ENSG00000157227	MMP14	matrix metallopeptidase 14 [Source:HGNC Symbol;Acc:HGNC:7160]	4323	-0.237976	0.177771	0.312693	0.743897	0.204436	0.236852	0.0414929	0.00241938	0.415748	0.550669	0.981873	0.0374929	0.007219	0.000386698		*		0.26346	0.0115703		0.306174	0.00114692
ENSG00000157870	PRXL2B	peroxiredoxin like 2B [Source:HGNC Symbol;Acc:HGNC:28390]	127281	-0.0104957	-0.0685	0.21125	0.405288	0.923278	0.507979	0.0287753	0.0204464	-0.0580043	0.221746	0.415784	0.595693	0.0330755	0.0190608
ENSG00000158710	TAGLN2	transgelin 2 [Source:HGNC Symbol;Acc:HGNC:11554]	8407	-0.0194509	0.137158	0.218679	0.202644	0.801207	0.034042	0.00101721	0.0279115	0.156609	0.23813	0.222095	0.0509676	0.00401326	0.0276257		*		0.255117	0.0138159		0.302682	0.00132061
ENSG00000159110	IFNAR2	interferon alpha and beta receptor subunit 2 [Source:HGNC Symbol;Acc:HGNC:5433]	3455	-0.022327	0.287158	0.353891	0.470762	0.85544	0.0219422	0.0183047	0.00266452	0.309485	0.376218	0.493089	0.0171362	0.0143315	0.00217056		*		0.344296	0.00137906		0.106869	0.179014
ENSG00000159398	CES5A	carboxylesterase 5A [Source:HGNC Symbol;Acc:HGNC:26459]	221223	0.0722122	-0.204526	-0.260752	-0.551595	0.578048	0.074293	0.021449	0.00271669	-0.276738	-0.332964	-0.623807	0.0240564	0.00658671	0.00122939
ENSG00000160094	ZNF362	zinc finger protein 362 [Source:HGNC Symbol;Acc:HGNC:18079]	149076	0.0268242	-0.138661	-0.22363	-0.364069	0.796344	0.163747	0.0432305	0.00664521	-0.165485	-0.250454	-0.390894	0.0891803	0.0216905	0.00409983				-0.0148402	0.353445		0.0749915	0.266017
ENSG00000160282	FTCD	formimidoyltransferase cyclodeaminase [Source:HGNC Symbol;Acc:HGNC:3974]	10841	0.103501	-0.274372	-0.551568	-1.41008	0.735161	0.262732	0.0269286	0.015951	-0.377873	-0.655069	-1.51358	0.24491	0.0476794	0.0115103				-0.18363	0.0559448		0.0189761	0.439577
ENSG00000160588	MPZL3	myelin protein zero like 3 [Source:HGNC Symbol;Acc:HGNC:27279]	196264	0.0176153	0.130318	0.227997	0.547373	0.826245	0.0993147	0.00862582	0.0446899	0.112702	0.210382	0.529758	0.192029	0.0241523	0.0498014				0.168096	0.0719976		0.11075	0.169744
ENSG00000160746	ANO10	anoctamin 10 [Source:HGNC Symbol;Acc:HGNC:25519]	55129	0.0574382	0.191053	0.259229	0.395221	0.452438	0.00973289	0.000367948	0.0171463	0.133614	0.201791	0.337783	0.134123	0.0220448	0.0332532				0.0883319	0.20141		-0.0994502	0.19797
ENSG00000160868	CYP3A4	cytochrome P450 family 3 subfamily A member 4 [Source:HGNC Symbol;Acc:HGNC:2637]	1576	-0.129476	-0.344116	-0.774407	-2.07245	0.696957	0.263637	0.00974895	0.00449513	-0.21464	-0.644931	-1.94298	0.517574	0.0467612	0.00608618				-0.0111479	0.360651		-0.0243491	0.423804
ENSG00000160972	PPP1R16A	protein phosphatase 1 regulatory subunit 16A [Source:HGNC Symbol;Acc:HGNC:14941]	84988	-0.0428452	-0.30085	-0.42102	-0.863234	0.777324	0.0146851	0.00100239	8.73585e-07	-0.258005	-0.378174	-0.820389	0.0890976	0.0155597	1.43209e-05				-0.100254	0.178179		-0.0372936	0.384139
ENSG00000162365	CYP4A22	cytochrome P450 family 4 subfamily A member 22 [Source:HGNC Symbol;Acc:HGNC:20575]	284541	-0.0498874	-0.151704	-0.628317	-1.48659	0.849776	0.532433	0.028659	0.0113409	-0.101816	-0.578429	-1.43671	0.671338	0.0419764	0.0133926
ENSG00000162460	TMEM82	transmembrane protein 82 [Source:HGNC Symbol;Acc:HGNC:32350]	388595	-0.030143	-0.121305	-0.515156	-1.11698	0.899172	0.550865	0.0209526	0.0321219	-0.0911624	-0.485013	-1.08683	0.678752	0.042533	0.03606		*		-0.236369	0.0206308		-0.0977335	0.202448
ENSG00000162704	ARPC5	actin related protein 2/3 complex subunit 5 [Source:HGNC Symbol;Acc:HGNC:708]	10092	0.041585	0.103945	0.19405	0.429399	0.488795	0.199781	0.00380594	0.00138718	0.0623605	0.152465	0.387814	0.404163	0.00963326	0.00306654		*		0.483039	9.23039e-06		0.128478	0.130131
ENSG00000162882	HAAO	3-hydroxyanthranilate 3,4-dioxygenase [Source:HGNC Symbol;Acc:HGNC:4796]	23498	-0.0406071	-0.239877	-0.531893	-1.57086	0.860662	0.246372	0.0129105	0.0192785	-0.19927	-0.491286	-1.53025	0.396385	0.042105	0.0209659		*		-0.402026	0.000220534		-0.313658	0.000850817
ENSG00000163344	PMVK	phosphomevalonate kinase [Source:HGNC Symbol;Acc:HGNC:9141]	10654	0.00743872	-0.200873	-0.261762	-0.480636	0.953194	0.0942734	0.0197863	0.0146626	-0.208312	-0.269201	-0.488075	0.109042	0.0294753	0.0146262				0.0328363	0.316692		-0.137812	0.111485
ENSG00000163590	PPM1L	protein phosphatase, Mg2+/Mn2+ dependent 1L [Source:HGNC Symbol;Acc:HGNC:16381]	151742	-0.0129149	-0.0568001	-0.262276	-0.294855	0.898491	0.595552	0.00329658	0.0316589	-0.0438852	-0.249361	-0.28194	0.695515	0.00971762	0.0421842				-0.0816988	0.21521		-0.107279	0.178228
ENSG00000164309	CMYA5	cardiomyopathy associated 5 [Source:HGNC Symbol;Acc:HGNC:14305]	202333	-0.0109254	-0.102859	-0.128501	-0.273308	0.857868	0.124458	0.0331768	0.000187045	-0.0919339	-0.117576	-0.262383	0.138793	0.032234	0.000212489				-0.158311	0.0838236		-0.120533	0.147118
ENSG00000164742	ADCY1	adenylate cyclase 1 [Source:HGNC Symbol;Acc:HGNC:232]	107	-0.0592869	-0.199752	-0.277946	-0.526736	0.506603	0.0219938	0.00405027	1.68329e-07	-0.140465	-0.21866	-0.46745	0.0638601	0.0113757	3.21809e-07		*		-0.429089	8.14865e-05		-0.440514	8.71802e-07
ENSG00000164823	OSGIN2	oxidative stress induced growth inhibitor family member 2 [Source:HGNC Symbol;Acc:HGNC:1355]	734	-0.0594469	0.293771	0.361703	0.643544	0.616453	0.0141378	0.0060824	0.00140824	0.353218	0.421149	0.702991	0.00132201	0.000677474	0.000871691				0.1569	0.0855493		-0.0537997	0.332608
ENSG00000165841	CYP2C19	cytochrome P450 family 2 subfamily C member 19 [Source:HGNC Symbol;Acc:HGNC:2621]	1557	-0.271384	-0.621466	-1.79987	-3.2534	0.502562	0.133676	1.83292e-05	4.13172e-10	-0.350082	-1.52849	-2.98201	0.431176	0.000659012	3.65661e-08		*		-0.264465	0.0113153		-0.493551	1.56289e-08
ENSG00000166224	SGPL1	sphingosine-1-phosphate lyase 1 [Source:HGNC Symbol;Acc:HGNC:10817]	8879	0.0569298	0.149758	0.227321	0.485363	0.385191	0.0257631	0.00103086	1.85135e-06	0.0928278	0.170391	0.428433	0.211779	0.0243429	8.84664e-06				-0.0238103	0.335316		-0.230459	0.0145621
ENSG00000166228	PCBD1	pterin-4 alpha-carbinolamine dehydratase 1 [Source:HGNC Symbol;Acc:HGNC:8646]	5092	-0.0331045	-0.227454	-0.43188	-1.01969	0.864214	0.208099	0.0203137	0.0294724	-0.194349	-0.398775	-0.986588	0.317292	0.0458487	0.0335528				0.064533	0.251114		-0.127334	0.13248
ENSG00000166333	ILK	integrin linked kinase [Source:HGNC Symbol;Acc:HGNC:6040]	3611	0.024371	0.0543742	0.171073	0.396645	0.722736	0.491483	0.0135521	0.00668522	0.0300032	0.146702	0.372274	0.708268	0.0374247	0.00920864		*		0.286662	0.00663627		0.18364	0.0462544
ENSG00000166582	CENPV	centromere protein V [Source:HGNC Symbol;Acc:HGNC:29920]	201161	0.0624066	-0.265417	-0.367288	-0.76964	0.666637	0.0569939	0.0102644	0.0224762	-0.327823	-0.429695	-0.832047	0.0331507	0.00655607	0.0160192		*		-0.28651	0.00665862		-0.00269498	0.482851
ENSG00000166592	RRAD	RRAD, Ras related glycolysis inhibitor and calcium channel regulator [Source:HGNC Symbol;Acc:HGNC:10446]	6236	0.109351	0.4025	0.627322	0.861608	0.630875	0.0651792	0.000363065	0.0188277	0.293149	0.51797	0.752256	0.250748	0.0206649	0.0390707		*		0.0764514	0.226215		0.404401	8.7204e-06
ENSG00000166896	ATP23	ATP23 metallopeptidase and ATP synthase assembly factor homolog [Source:HGNC Symbol;Acc:HGNC:29452]	91419	-0.0091145	-0.455608	-0.251832	-0.471853	0.958199	0.0111528	0.191837	0.0137833	-0.446493	-0.242718	-0.462738	0.0211309	0.237674	0.021557
ENSG00000167244	IGF2	insulin like growth factor 2 [Source:HGNC Symbol;Acc:HGNC:5466]	3481	0.0308502	-0.234882	-0.361836	-1.01706	0.858734	0.204919	0.0407001	0.000981916	-0.265732	-0.392686	-1.04791	0.141176	0.0229285	0.000863445				-0.0890423	0.199971		-0.00914107	0.466015
ENSG00000167363	FN3K	fructosamine 3 kinase [Source:HGNC Symbol;Acc:HGNC:24822]	64122	0.0987655	-0.291962	-0.401225	-0.991052	0.580046	0.11813	0.03161	0.00146094	-0.390727	-0.499991	-1.08982	0.0522878	0.013369	0.000721529				-0.105019	0.168787		-0.0440971	0.362645
ENSG00000168077	SCARA3	scavenger receptor class A member 3 [Source:HGNC Symbol;Acc:HGNC:19000]	51435	-0.122048	-0.278522	-0.373252	-0.541828	0.367369	0.0232807	0.00452309	0.000227628	-0.156473	-0.251204	-0.41978	0.175916	0.0431756	0.00225299				-0.133259	0.119037		-0.0748685	0.266411
ENSG00000168685	IL7R	interleukin 7 receptor [Source:HGNC Symbol;Acc:HGNC:6024]	3575	-0.0552419	0.351035	0.50904	0.972514	0.759458	0.0927117	0.0291111	0.0122524	0.406277	0.564282	1.02776	0.0325863	0.00979878	0.00983721				0.00241708	0.37742		0.0827001	0.243925
ENSG00000168884	TNIP2	TNFAIP3 interacting protein 2 [Source:HGNC Symbol;Acc:HGNC:19118]	79155	-0.0390465	0.200862	0.159119	0.363269	0.683026	0.0171071	0.0949179	0.0104112	0.239909	0.198165	0.402316	0.0130609	0.060303	0.00657569				0.181454	0.0580224		0.16304	0.0706886
ENSG00000169714	CNBP	CCHC-type zinc finger nucleic acid binding protein [Source:HGNC Symbol;Acc:HGNC:13164]	7555	0.00549556	-0.0253615	-0.0948977	-0.180399	0.901517	0.581851	0.0360218	0.0198863	-0.0308571	-0.100393	-0.185895	0.537656	0.0427656	0.0181921				-0.132847	0.119761		-0.0596788	0.313371
ENSG00000170248	PDCD6IP	programmed cell death 6 interacting protein [Source:HGNC Symbol;Acc:HGNC:8766]	10015	0.115376	0.325537	0.238663	0.61142	0.23838	0.00471466	0.0362861	0.000564182	0.210161	0.123287	0.496044	0.0420867	0.230485	0.00268986				-0.0598114	0.260888		-0.0644976	0.298137
ENSG00000170345	FOS	Fos proto-oncogene, AP-1 transcription factor subunit [Source:HGNC Symbol;Acc:HGNC:3796]	2353	-0.0117401	-0.416353	-0.555392	-1.07136	0.958236	0.0869343	0.0295592	0.00187061	-0.404613	-0.543652	-1.05962	0.0852023	0.0282467	0.00207012				0.40486	0.000201132		0.214186	0.0223563
ENSG00000172164	SNTB1	syntrophin beta 1 [Source:HGNC Symbol;Acc:HGNC:11168]	6641	0.0220142	-0.101709	-0.369336	-0.764472	0.885219	0.562129	0.0275291	0.00960854	-0.123723	-0.39135	-0.786487	0.445353	0.0114684	0.00853745		*		-0.269693	0.0100829		-0.277725	0.00331676
ENSG00000172425	TTC36	tetratricopeptide repeat domain 36 [Source:HGNC Symbol;Acc:HGNC:33708]	143941	-0.0497534	-0.26502	-0.562678	-1.71951	0.837883	0.239964	0.0112377	0.00815592	-0.215267	-0.512924	-1.66975	0.374681	0.0326348	0.00904751		*		-0.181438	0.058033		-0.245223	0.00957756
ENSG00000172500	FIBP	FGF1 intracellular binding protein [Source:HGNC Symbol;Acc:HGNC:3705]	9158	0.0202094	0.0688742	0.211449	0.259928	0.767563	0.405293	0.00972582	0.0141592	0.0486649	0.19124	0.239719	0.498173	0.0069888	0.0179255		*		0.24696	0.0165026		0.168513	0.0633935
ENSG00000172661	WASHC2C	WASH complex subunit 2C [Source:HGNC Symbol;Acc:HGNC:23414]	253725	-0.0235417	0.066685	0.320258	0.363555	0.80663	0.490734	0.00711964	0.00645475	0.0902267	0.343799	0.387097	0.346984	0.00400135	0.00443187
ENSG00000173848	NET1	neuroepithelial cell transforming 1 [Source:HGNC Symbol;Acc:HGNC:14592]	10276	-0.0668432	-0.154807	-0.284978	-0.831401	0.482695	0.112489	0.00558404	0.000144137	-0.0879636	-0.218135	-0.764558	0.367734	0.0329218	0.000265042		*		-0.271387	0.00969476		-0.233835	0.0133066
ENSG00000174586	ZNF497	zinc finger protein 497 [Source:HGNC Symbol;Acc:HGNC:23714]	162968	-0.0148874	-0.0561586	-0.151515	-0.215734	0.808185	0.39568	0.0026687	2.8105e-05	-0.0412712	-0.136627	-0.200846	0.557143	0.0156658	0.000570963		*		-0.276758	0.0084863		0.0474364	0.351966
ENSG00000174886	NDUFA11	NADH:ubiquinone oxidoreductase subunit A11 [Source:HGNC Symbol;Acc:HGNC:20371]	126328	0.0144379	-0.101297	-0.158454	-0.438999	0.844648	0.183299	0.0205439	0.0095294	-0.115735	-0.172892	-0.453437	0.164464	0.0245034	0.00780848
ENSG00000175115	PACS1	phosphofurin acidic cluster sorting protein 1 [Source:HGNC Symbol;Acc:HGNC:30032]	55690	-0.12212	0.0849415	0.239784	0.608008	0.253279	0.376546	0.00731296	0.0117433	0.207062	0.361905	0.730128	0.0575279	0.000757579	0.0045241				0.153548	0.0897739		0.0934808	0.213567
ENSG00000176915	ANKLE2	ankyrin repeat and LEM domain containing 2 [Source:HGNC Symbol;Acc:HGNC:29101]	23141	0.0270484	0.25427	0.183981	0.46202	0.802382	0.0098708	0.109522	0.00234624	0.227222	0.156933	0.434971	0.0363617	0.202248	0.00417292				-0.120033	0.1409		0.0964971	0.205426
ENSG00000178096	BOLA1	bolA family member 1 [Source:HGNC Symbol;Acc:HGNC:24263]	51027	-0.0237418	-0.189321	-0.214039	-0.464416	0.807578	0.0525966	0.0242211	0.0018463	-0.16558	-0.190297	-0.440674	0.0814161	0.0392689	0.0027128				0.125419	0.132001		0.0133133	0.454895
ENSG00000178449	COX14	cytochrome c oxidase assembly factor COX14 [Source:HGNC Symbol;Acc:HGNC:28216]	84987	0.0139233	-0.132155	-0.236862	-0.483784	0.892866	0.179035	0.0258401	0.00129155	-0.146078	-0.250785	-0.497707	0.1158	0.0137319	0.00106222				0.18252	0.0569805		0.073255	0.271344
ENSG00000179636	TPPP2	tubulin polymerization promoting protein family member 2 [Source:HGNC Symbol;Acc:HGNC:19293]	122664	0.109434	-0.139445	-0.365164	-0.679364	0.521733	0.429908	0.0446077	0.00559368	-0.248879	-0.474598	-0.788798	0.104589	0.00336647	0.00189792		*		-0.279741	0.00787231		-0.0871436	0.231213
ENSG00000179922	ZNF784	zinc finger protein 784 [Source:HGNC Symbol;Acc:HGNC:33111]	147808	-0.0124203	-0.162057	-0.174477	-0.193492	0.860048	0.00803545	0.0118755	0.0774753	-0.149637	-0.162057	-0.181071	0.0285259	0.0316137	0.10245				-0.168778	0.0712209		0.045166	0.359086
ENSG00000182022	CHST15	carbohydrate sulfotransferase 15 [Source:HGNC Symbol;Acc:HGNC:18137]	51363	-0.0255463	0.0285153	0.236984	0.635818	0.792813	0.832627	0.0454787	0.00736043	0.0540616	0.26253	0.661364	0.698025	0.0343882	0.00582844		*		0.216016	0.0309095		0.113428	0.163516
ENSG00000182541	LIMK2	LIM domain kinase 2 [Source:HGNC Symbol;Acc:HGNC:6614]	3985	-0.107143	0.246089	0.303523	0.402114	0.414004	0.0656393	0.0494	0.0479375	0.353233	0.410666	0.509257	0.0097172	0.00915658	0.0176614		*		0.273355	0.00925372		0.434069	1.30184e-06
ENSG00000182902	SLC25A18	solute carrier family 25 member 18 [Source:HGNC Symbol;Acc:HGNC:10988]	83733	0.0602959	-0.363169	-0.312331	-0.779987	0.736501	0.0259153	0.0956572	0.00734445	-0.423465	-0.372627	-0.840283	0.0284161	0.0801513	0.00511422				0.238625	0.0196532		0.291063	0.00203692
ENSG00000184922	FMNL1	formin like 1 [Source:HGNC Symbol;Acc:HGNC:1212]	752	-0.0739357	0.207075	0.28895	0.615157	0.546256	0.120884	0.0336192	0.039071	0.281011	0.362886	0.689093	0.0391533	0.00924859	0.0254411				0.172869	0.067021		0.0572902	0.32082
ENSG00000185808	PIGP	phosphatidylinositol glycan anchor biosynthesis class P [Source:HGNC Symbol;Acc:HGNC:3046]	51227	0.00690261	-0.211656	-0.341364	-0.648095	0.956752	0.0940458	0.0116469	0.0116013	-0.218558	-0.348267	-0.654998	0.0894243	0.0115333	0.0110808				0.228072	0.024537		-0.120772	0.146524
ENSG00000189283	FHIT	fragile histidine triad diadenosine triphosphatase [Source:HGNC Symbol;Acc:HGNC:3701]	2272	0.0103653	-0.204712	-0.275036	-0.453938	0.936079	0.0129623	0.00263034	0.000368629	-0.215078	-0.285401	-0.464303	0.108478	0.0415139	0.00266229				-0.0536721	0.274086		-0.0152165	0.449782
ENSG00000196562	SULF2	sulfatase 2 [Source:HGNC Symbol;Acc:HGNC:20392]	55959	0.23272	0.222946	0.54836	0.686319	0.1257	0.168163	0.00159914	0.0056388	-0.00977439	0.31564	0.453599	0.948199	0.0463686	0.0406903		*		0.382666	0.000432382		0.348158	0.000178345
ENSG00000196878	LAMB3	laminin subunit beta 3 [Source:HGNC Symbol;Acc:HGNC:6490]	3914	-0.0114919	0.646281	0.645547	1.11536	0.967283	0.0089463	0.00998944	0.000118814	0.657773	0.657039	1.12686	0.0225722	0.0239766	0.000428625				-0.0219738	0.339166		0.027125	0.415401
ENSG00000197114	ZGPAT	zinc finger CCCH-type and G-patch domain containing [Source:HGNC Symbol;Acc:HGNC:15948]	84619	0.00362618	-0.178708	-0.289841	-0.807524	0.980018	0.22944	0.0376307	0.00194159	-0.182334	-0.293467	-0.81115	0.247723	0.0498452	0.00184403		*		-0.333224	0.00188549		0.0406944	0.373215
ENSG00000197555	SIPA1L1	signal induced proliferation associated 1 like 1 [Source:HGNC Symbol;Acc:HGNC:20284]	26037	-0.0210183	0.199408	0.198001	0.373971	0.842576	0.0387889	0.0560899	0.0321231	0.220427	0.21902	0.39499	0.0293129	0.0420744	0.026192				0.0551151	0.271034		-0.0571333	0.321349
ENSG00000197879	MYO1C	myosin IC [Source:HGNC Symbol;Acc:HGNC:7597]	4641	-0.035041	0.0273247	0.18311	0.345973	0.693736	0.770402	0.0462154	0.00775962	0.0623657	0.218151	0.381014	0.489944	0.014977	0.00427587				0.0110179	0.360782		0.0436404	0.364156
ENSG00000198053	SIRPA	signal regulatory protein alpha [Source:HGNC Symbol;Acc:HGNC:9662]	140885	0.00401163	0.300733	0.273335	0.562967	0.973437	0.00461931	0.0126991	0.000141043	0.296722	0.269323	0.558955	0.0190261	0.036799	0.000317077		*		0.305339	0.00408348		0.0527571	0.335457
ENSG00000198363	ASPH	aspartate beta-hydroxylase [Source:HGNC Symbol;Acc:HGNC:757]	444	0.0182985	0.0746039	0.213631	0.453053	0.839877	0.400454	0.0181943	0.00134893	0.0563054	0.195332	0.434754	0.5516	0.0423859	0.00191127		*		0.234282	0.0215948		-0.0991816	0.198495
ENSG00000198743	SLC5A3	solute carrier family 5 member 3 [Source:HGNC Symbol;Acc:HGNC:11038]	6526	0.000407374	0.241996	0.281786	0.730597	0.997285	0.0873564	0.0101542	0.00186877	0.241588	0.281379	0.730189	0.109863	0.0221848	0.00170403				-0.133184	0.119151		-0.159056	0.076482
ENSG00000203896	LIME1	Lck interacting transmembrane adaptor 1 [Source:HGNC Symbol;Acc:HGNC:26016]	54923	-0.0263265	-0.350659	-0.510402	-1.20045	0.904956	0.0557146	0.00628476	0.000308119	-0.324333	-0.484075	-1.17412	0.167576	0.0423946	0.000384636				-0.0717904	0.236227		0.122111	0.143603
ENSG00000204209	DAXX	death domain associated protein [Source:HGNC Symbol;Acc:HGNC:2681]	1616	-0.000836938	0.143339	0.161383	0.371667	0.991709	0.0445654	0.015041	0.00606755	0.144176	0.16222	0.372504	0.0893004	0.0456534	0.00625807
ENSG00000204219	TCEA3	transcription elongation factor A3 [Source:HGNC Symbol;Acc:HGNC:11615]	6920	-0.00122248	-0.285439	-0.509333	-1.30215	0.995044	0.165072	0.012678	0.0157549	-0.284217	-0.508111	-1.30093	0.204363	0.022862	0.0153977
ENSG00000204228	HSD17B8	hydroxysteroid 17-beta dehydrogenase 8 [Source:HGNC Symbol;Acc:HGNC:3554]	7923	-0.0847945	-0.285656	-0.478984	-1.12771	0.639437	0.0941425	0.0063268	0.00690199	-0.200862	-0.394189	-1.04291	0.30902	0.049933	0.00942331
ENSG00000204262	COL5A2	collagen type V alpha 2 chain [Source:HGNC Symbol;Acc:HGNC:2210]	1290	-0.119984	-0.0228906	0.279024	0.739719	0.317931	0.853159	0.0363968	0.0119048	0.0970935	0.399008	0.859703	0.389026	0.00178387	0.00617589		*		0.271747	0.00960729		-0.0201171	0.43637
ENSG00000204822	MRPL53	mitochondrial ribosomal protein L53 [Source:HGNC Symbol;Acc:HGNC:16684]	116540	-0.0792485	-0.19836	-0.275055	-0.521034	0.435742	0.0390263	0.00547575	0.000574589	-0.119111	-0.195807	-0.441785	0.190944	0.0367206	0.00208307				0.102229	0.174319		0.0294802	0.408523
ENSG00000206535	LNP1	leukemia NUP98 fusion partner 1 [Source:HGNC Symbol;Acc:HGNC:28014]	348801	-0.0159551	-0.0534742	-0.197173	-0.45358	0.869037	0.562327	0.0353345	0.000140908	-0.0375191	-0.181218	-0.437625	0.678592	0.0490684	0.00022581		*		-0.206822	0.0369329		-0.353719	0.000138061
ENSG00000214253	FIS1	fission, mitochondrial 1 [Source:HGNC Symbol;Acc:HGNC:21689]	51024	-0.0558617	-0.295574	-0.321923	-0.776035	0.537723	0.00390397	0.00609094	0.00102975	-0.239713	-0.266061	-0.720173	0.0208311	0.0240473	0.00151472				0.127616	0.128154		0.00799727	0.469052
ENSG00000214435	AS3MT	arsenite methyltransferase [Source:HGNC Symbol;Acc:HGNC:17452]	57412	-0.0715295	-0.259817	-0.44522	-0.931226	0.707795	0.118156	0.00659428	0.0023905	-0.188287	-0.373691	-0.859697	0.298114	0.0371714	0.00418625
ENSG00000215375	MYL5	myosin light chain 5 [Source:HGNC Symbol;Acc:HGNC:7586]	4636	-0.0249629	-0.210018	-0.435004	-0.640637	0.849521	0.186627	0.00269391	0.00350237	-0.185055	-0.410041	-0.615674	0.252646	0.00571067	0.00457994				-0.0992797	0.180046		0.0438953	0.363239
ENSG00000219607	PPP1R3G	protein phosphatase 1 regulatory subunit 3G [Source:HGNC Symbol;Acc:HGNC:14945]	648791	-0.185856	-0.32233	-0.496161	-0.850891	0.22459	0.011808	0.000359739	1.9374e-05	-0.136474	-0.310304	-0.665035	0.297631	0.0272326	0.000371353		*		-0.304148	0.00420375		-0.189643	0.0404716
ENSG00000221869	CEBPD	CCAAT enhancer binding protein delta [Source:HGNC Symbol;Acc:HGNC:1835]	1052	-0.0418211	-0.199519	-0.316775	-0.771989	0.744046	0.122343	0.00784873	0.000589787	-0.157698	-0.274954	-0.730167	0.245872	0.0302232	0.000866085				0.227601	0.0247418		0.103402	0.187959
ENSG00000222033	LINC01124	long intergenic non-protein coding RNA 1124 [Source:HGNC Symbol;Acc:HGNC:49270]	440925	0.111757	-0.0186422	-0.165296	-0.271089	0.14615	0.823063	0.0105169	0.000606973	-0.1304	-0.277054	-0.382847	0.138306	0.000225069	2.85709e-05
ENSG00000230513	THAP7-AS1	THAP7 antisense RNA 1 [Source:HGNC Symbol;Acc:HGNC:41013]	439931	-0.135317	-0.331089	-0.482793	-0.706838	0.243109	0.0152309	0.000296453	0.00154476	-0.195772	-0.347476	-0.571521	0.14587	0.0077928	0.00561268
ENSG00000241935	HOGA1	4-hydroxy-2-oxoglutarate aldolase 1 [Source:HGNC Symbol;Acc:HGNC:25155]	112817	0.00440012	-0.37253	-0.551863	-1.22897	0.983159	0.0718722	0.00374748	0.00106348	-0.37693	-0.556264	-1.23337	0.121713	0.0162304	0.000840898		*		-0.230223	0.0234342		-0.162923	0.0708593
ENSG00000242220	TCP10L	t-complex 10 like [Source:HGNC Symbol;Acc:HGNC:11657]	140290	-0.0317796	-0.250634	-0.730715	-1.26237	0.877838	0.263004	0.000224198	3.4511e-06	-0.218854	-0.698935	-1.23059	0.348066	0.000949455	8.5398e-06		*		-0.114532	0.150946		-0.2637	0.00537716
ENSG00000243646	IL10RB	interleukin 10 receptor subunit beta [Source:HGNC Symbol;Acc:HGNC:5965]	3588	0.00655266	0.196637	0.282872	0.487629	0.935501	0.0563607	0.00178921	0.00141977	0.190084	0.276319	0.481077	0.069436	0.00293525	0.00154238		*		0.225149	0.0259758		-0.0225777	0.428848
ENSG00000250436	LINC02499	long intergenic non-protein coding RNA 2499 [Source:HGNC Symbol;Acc:HGNC:53484]	728040	-0.158402	-0.076705	-0.772876	-1.13976	0.447885	0.714875	0.00109594	0.0145768	0.0816972	-0.614474	-0.981359	0.716142	0.0120785	0.0276265
ENSG00000250510	GPR162	G protein-coupled receptor 162 [Source:HGNC Symbol;Acc:HGNC:16693]	27239	-0.00325895	-0.218693	-0.27378	-0.30378	0.975956	0.0338883	0.0111895	0.0371619	-0.215434	-0.270521	-0.300521	0.0418077	0.0145427	0.0405416				-0.0344093	0.314059		0.105395	0.183184
ENSG00000253598	SLC10A5	solute carrier family 10 member 5 [Source:HGNC Symbol;Acc:HGNC:22981]	347051	-0.0334034	-0.166397	-0.302554	-0.373347	0.738315	0.112741	0.00055765	0.00316615	-0.132993	-0.26915	-0.339943	0.206591	0.00252076	0.00639344				-0.161725	0.07972		-0.124519	0.138535
ENSG00000253764	KBTBD11-AS1	KBTBD11 antisense RNA 1 [Source:HGNC Symbol;Acc:HGNC:55530]	101928058	0.0706279	-0.0749585	-0.271647	-0.317078	0.617654	0.478246	0.00587405	0.00524524	-0.145586	-0.342275	-0.387706	0.261266	0.00797996	0.0054643
ENSG00000255153	TOLLIP-DT	TOLLIP divergent transcript [Source:HGNC Symbol;Acc:HGNC:27403]	255512	0.00358396	-0.191951	-0.327959	-0.6069	0.979509	0.130908	0.0159409	0.00849109	-0.195535	-0.331543	-0.610484	0.127315	0.0160624	0.00836812
ENSG00000257093	DENND11	DENN domain containing 11 [Source:HGNC Symbol;Acc:HGNC:29472]	57189	0.0650371	0.152582	0.306265	0.502919	0.569023	0.178432	0.00989174	0.00213961	0.087545	0.241228	0.437882	0.421232	0.0340885	0.00534802
ENSG00000258498	DIO3OS	DIO3 opposite strand upstream RNA [Source:HGNC Symbol;Acc:HGNC:20348]	64150	0.0329696	-0.326011	-0.396943	-0.467339	0.86855	0.0536661	0.0208411	0.0310978	-0.358981	-0.429912	-0.500308	0.035997	0.0138486	0.0228072
ENSG00000258920	FOXN3-AS1	FOXN3 antisense RNA 1 [Source:HGNC Symbol;Acc:HGNC:44290]	400236	-0.225139	-0.204831	-0.486945	-0.743362	0.119144	0.148294	0.000192238	0.00012767	0.0203081	-0.261806	-0.518224	0.888537	0.0433809	0.00328375
ENSG00000268006	PTOV1-AS1	PTOV1 antisense RNA 1 [Source:HGNC Symbol;Acc:HGNC:44174]	100506033	-0.0233688	-0.0470541	-0.166947	-0.217542	0.692812	0.459338	0.00245869	0.00191808	-0.0236853	-0.143578	-0.194173	0.72496	0.0158	0.00612002
ENSG00000270885	RASL10B	RAS like family 10 member B [Source:HGNC Symbol;Acc:HGNC:30295]	91608	0.0899057	-0.057657	-0.146444	-0.212822	0.267349	0.486108	0.0223545	0.0316544	-0.147563	-0.236349	-0.302727	0.120637	0.00402718	0.00702057				-0.168788	0.0712209		-0.0685196	0.28515
ENSG00000272143	FGF14-AS2	FGF14 antisense RNA 2 [Source:HGNC Symbol;Acc:HGNC:44368]	283481	-0.0610186	-0.179261	-0.437125	-0.768681	0.685413	0.19651	0.00110515	1.79689e-07	-0.118243	-0.376106	-0.707662	0.399904	0.00577211	3.96626e-06
