# Supplementary material for: Global molecular landscape of early MASLD progression in human obesity
Source: eLife. 2026 Mar 23;14:RP109534. doi: 10.7554/eLife.109534 (PMC13008360; doi:10.7554/eLife.109534)
Supplement: Supplementary file 13. [file elife-109534-supp13.xlsx]

## Sheet: Sheet1
Category	Category2	Category3	Gene stable ID	HGNC symbol	Gene description	NCBI gene (formerly Entrezgene) ID	coef_Histo_Fibrosis	pval_Histo_Fibrosis	qval_Histo_Fibrosis	log2FC_Transition	pval_Transition	qval_Transition	coef_Histo_Steatosis	pval_Histo_Steatosis	qval_Histo_Steatosis	coef_Histo_NAS	pval_Histo_NAS	qval_Histo_NAS	coef_Histo_Inflammation	pval_Histo_Inflammation	qval_Histo_Inflammation	coef_Histo_Ballooning	pval_Histo_Ballooning	qval_Histo_Ballooning
Rho GTPase	GTPase	Rho	ENSG00000116574	RHOU	ras homolog family member U [Source:HGNC Symbol;Acc:HGNC:17794]	58480	0.487247	3.15279e-05	0.00961665	0.446602	0.000367916	0.0804437	0.133722	0.276882	0.332204	0.0728458	0.273595	0.365599	0.366606	0.018624	0.675133	0.593965	0.0363859	0.318327
Rho GEFs	GEFs	Rho	ENSG00000114790	ARHGEF26	Rho guanine nucleotide exchange factor 26 [Source:HGNC Symbol;Acc:HGNC:24490]	26084	-0.468057	3.32205e-05	0.00961665	-0.434116	0.000698192	0.0978123	-0.214328	0.0686747	0.165674	-0.0783982	0.220785	0.332651	0.314615	0.0500743	0.768799	0.58208	0.0458013	0.344307
Ras GTPase	GTPase	Ras	ENSG00000166592	RRAD	RRAD, Ras related glycolysis inhibitor and calcium channel regulator [Source:HGNC Symbol;Acc:HGNC:10446]	6236	0.474956	6.46566e-05	0.00988962	0.450781	0.0391211	0.21009	0.459283	0.000125697	0.00794075	0.189229	0.00413567	0.0589268	0.379026	0.0170921	0.665926	0.916681	0.00128948	0.141376
Rho GEFs	GEFs	Rho	ENSG00000173848	NET1	neuroepithelial cell transforming 1 [Source:HGNC Symbol;Acc:HGNC:14592]	10276	-0.441338	5.62118e-05	0.00988962	-0.232811	0.0106847	0.156331	-0.35865	0.00134098	0.0225737	-0.201127	0.000863535	0.028794	0.423568	0.00712343	0.605959	0.667994	0.0200657	0.27187
Rab GEFs	GEFs	Rab	ENSG00000105186	ANKRD27	ankyrin repeat domain 27 [Source:HGNC Symbol;Acc:HGNC:25310]	84079	0.443759	9.84778e-05	0.0100375	0.0894584	0.165341	0.311256	0.340628	0.00346764	0.0356586	0.189467	0.00261955	0.0488042	0.309301	0.0538917	0.770375	0.454437	0.120179	0.439197
Arf GAPs	GAPs	Arf	ENSG00000186635	ARAP1	ArfGAP with RhoGAP domain, ankyrin repeat and PH domain 1 [Source:HGNC Symbol;Acc:HGNC:16925]	116985	0.413477	0.000554006	0.0171573	0.187404	0.139979	0.294117	0.372971	0.00205866	0.0282226	0.199926	0.00227764	0.0450108	0.306447	0.0502739	0.76927	0.341093	0.233347	0.526995
Ras GTPase	GTPase	Ras	ENSG00000168256	NKIRAS2	NFKB inhibitor interacting Ras like 2 [Source:HGNC Symbol;Acc:HGNC:17898]	28511	0.407381	0.000675664	0.0186564	0.130252	0.101895	0.266931	0.304273	0.0127311	0.0686504	0.121143	0.0690426	0.20391	0.326975	0.0408963	0.743933	0.750498	0.0092269	0.233757
Ras GAPs	GAPs	Ras	ENSG00000155903	RASA2	RAS p21 protein activator 2 [Source:HGNC Symbol;Acc:HGNC:9872]	5922	0.355403	0.00105033	0.0202222	0.238526	0.0006351	0.0955411	0.0644528	0.565478	0.471976	0.0436896	0.47127	0.466895	0.136722	0.392731	0.854871	0.165908	0.568339	0.67438
Rho GTPase	GTPase	Rho	ENSG00000108830	RND2	Rho family GTPase 2 [Source:HGNC Symbol;Acc:HGNC:18315]	8153	-0.353243	0.00119539	0.0210608	-0.212446	0.0507343	0.224111	-0.359899	0.000997798	0.0200636	-0.158765	0.00793201	0.0792125	0.191056	0.234983	0.834814	0.659709	0.0224353	0.277505
Rho GAPs	GAPs	Rho	ENSG00000106069	CHN2	chimerin 2 [Source:HGNC Symbol;Acc:HGNC:1944]	1124	-0.376556	0.0012801	0.0214614	-0.244609	0.0267973	0.190038	-0.339335	0.00405851	0.0378793	-0.166923	0.00927916	0.0864419	-0.275228	0.0742877	0.770375	-0.372625	0.185045	0.493572
Rab GTPase	GTPase	Rab	ENSG00000168118	RAB4A	RAB4A, member RAS oncogene family [Source:HGNC Symbol;Acc:HGNC:9781]	5867	-0.385557	0.00134985	0.0220697	-0.235439	0.0113714	0.157651	-0.178471	0.148734	0.244003	-0.0833814	0.213138	0.327594	0.273437	0.0830082	0.770751	0.325172	0.258596	0.54212
Rho GEFs	GEFs	Rho	ENSG00000127084	FGD3	FYVE, RhoGEF and PH domain containing 3 [Source:HGNC Symbol;Acc:HGNC:16027]	89846	0.365056	0.00138322	0.0221361	0.333174	3.01442e-05	0.0542509	0.145294	0.216061	0.293415	0.0970655	0.125773	0.265772	0.524031	0.00082946	0.453152	0.778282	0.00683801	0.222568
Ras GTPase	GTPase	Ras	ENSG00000270885	RASL10B	RAS like family 10 member B [Source:HGNC Symbol;Acc:HGNC:30295]	91608	-0.380817	0.00148437	0.0228905	-0.206404	0.00889142	0.154326	-0.186853	0.128699	0.227184	-0.0808005	0.225776	0.335728	-0.314623	0.0338487	0.725558	-0.514786	0.0564814	0.362048
Ras GTPase	GTPase	Ras	ENSG00000125249	RAP2A	RAP2A, member of RAS oncogene family [Source:HGNC Symbol;Acc:HGNC:9861]	5911	0.369127	0.00156675	0.0232388	0.315773	0.00135341	0.106713	0.0440255	0.714887	0.52483	0.0100274	0.877824	0.605738	0.184858	0.253706	0.841179	0.794165	0.00598188	0.217894
Rab GTPase	GTPase	Rab	ENSG00000118508	RAB32	RAB32, member RAS oncogene family [Source:HGNC Symbol;Acc:HGNC:9772]	10981	0.367844	0.00156437	0.0232388	0.177529	0.0433945	0.215562	0.253481	0.0325412	0.11181	0.0949873	0.141442	0.280128	0.30467	0.0520627	0.76927	0.619583	0.0291294	0.29904
Arf GAPs	GAPs	Arf	ENSG00000139436	GIT2	GIT ArfGAP 2 [Source:HGNC Symbol;Acc:HGNC:4273]	9815	0.36705	0.00204481	0.0257227	0.195077	0.0341584	0.204003	0.484512	3.44598e-05	0.00516035	0.242198	0.000146071	0.0191576	-0.211703	0.174625	0.816199	-0.20831	0.463632	0.638749
Rho GTPase	GTPase	Rho	ENSG00000136238	RAC1	Rac family small GTPase 1 [Source:HGNC Symbol;Acc:HGNC:9801]	5879	0.361681	0.00234961	0.027028	0.0939011	0.0632624	0.236921	0.179103	0.141369	0.238089	0.0896744	0.173912	0.302054	0.215034	0.177514	0.816199	0.724522	0.0112431	0.237457
Rho GAPs	GAPs	Rho	ENSG00000089639	GMIP	GEM interacting protein [Source:HGNC Symbol;Acc:HGNC:24852]	51291	0.342053	0.00267105	0.027777	0.33414	0.000372993	0.0804437	0.136144	0.243975	0.312768	0.0887244	0.159776	0.293086	-0.222601	0.165614	0.81556	-0.382416	0.189875	0.495693
Arf GTPase	GTPase	Arf	ENSG00000134287	ARF3	ADP ribosylation factor 3 [Source:HGNC Symbol;Acc:HGNC:654]	377	0.349141	0.00268969	0.0279204	0.124728	0.0981718	0.262963	0.171083	0.150912	0.245494	0.0647483	0.316516	0.390423	0.238157	0.1368	0.803334	0.551701	0.0566808	0.362048
Ras GTPase	GTPase	Ras	ENSG00000122035	RASL11A	RAS like family 11 member A [Source:HGNC Symbol;Acc:HGNC:23802]	387496	-0.338875	0.00315328	0.0293641	-0.0440589	0.727389	0.546304	-0.48396	1.57765e-05	0.00368877	-0.238263	9.99625e-05	0.0166378	0.310449	0.0519366	0.76927	0.730096	0.0112022	0.237457
Rab GTPase	GTPase	Rab	ENSG00000111540	RAB5B	RAB5B, member RAS oncogene family [Source:HGNC Symbol;Acc:HGNC:9784]	5869	0.341041	0.00320263	0.029566	0.0939858	0.162951	0.309636	0.13346	0.260567	0.322834	0.0299592	0.641665	0.533847	0.142204	0.377044	0.854871	0.480099	0.0986238	0.419127
Rho GAPs	GAPs	Rho	ENSG00000186517	ARHGAP30	Rho GTPase activating protein 30 [Source:HGNC Symbol;Acc:HGNC:27414]	257106	0.346313	0.0034339	0.030066	0.234265	0.0121658	0.159945	0.248073	0.039164	0.122822	0.153486	0.0179085	0.111998	0.254097	0.113216	0.797116	0.844377	0.00317902	0.172961
Rho GEFs	GEFs	Rho	ENSG00000139132	FGD4	FYVE, RhoGEF and PH domain containing 4 [Source:HGNC Symbol;Acc:HGNC:19125]	121512	-0.346971	0.00350803	0.0301649	-0.120321	0.1792	0.319406	-0.28896	0.0162623	0.077622	-0.148843	0.0223682	0.122736	0.213919	0.17359	0.816199	0.348029	0.223252	0.520741
Rho GTPase	GTPase	Rho	ENSG00000070831	CDC42	cell division cycle 42 [Source:HGNC Symbol;Acc:HGNC:1736]	998	0.341813	0.00379049	0.0311753	0.0925685	0.0462786	0.218828	0.229633	0.0559279	0.149003	0.123616	0.0572102	0.187197	0.148848	0.352986	0.850281	0.455481	0.115844	0.434696
Rho GEFs	GEFs	Rho	ENSG00000104880	ARHGEF18	Rho/Rac guanine nucleotide exchange factor 18 [Source:HGNC Symbol;Acc:HGNC:17090]	23370	0.335943	0.00466493	0.0341142	0.0907259	0.223392	0.341275	0.215225	0.074915	0.172428	0.11445	0.0801439	0.218119	-0.121053	0.442215	0.861348	-0.502199	0.0769888	0.391753
Rab GTPase	GTPase	Rab	ENSG00000124839	RAB17	RAB17, member RAS oncogene family [Source:HGNC Symbol;Acc:HGNC:16523]	64284	-0.328803	0.00552276	0.0371269	-0.412367	0.0116204	0.159209	-0.150214	0.21466	0.292342	-0.0871855	0.182867	0.306731	-0.248488	0.107191	0.797116	-0.414312	0.139545	0.460073
Ras GAPs	GAPs	Ras	ENSG00000165219	GAPVD1	GTPase activating protein and VPS9 domains 1 [Source:HGNC Symbol;Acc:HGNC:23375]	26130	0.32758	0.00587253	0.038143	0.108676	0.171145	0.313895	0.110189	0.365229	0.38219	0.0737917	0.261821	0.359156	0.322749	0.0397452	0.743933	0.705659	0.0127765	0.246801
Rab GEFs	GEFs	Rab	ENSG00000165219	GAPVD1	GTPase activating protein and VPS9 domains 1 [Source:HGNC Symbol;Acc:HGNC:23375]	26130	0.32758	0.00587253	0.038143	0.108676	0.171145	0.313895	0.110189	0.365229	0.38219	0.0737917	0.261821	0.359156	0.322749	0.0397452	0.743933	0.705659	0.0127765	0.246801
Rab GTPase	GTPase	Rab	ENSG00000124209	RAB22A	RAB22A, member RAS oncogene family [Source:HGNC Symbol;Acc:HGNC:9764]	57403	0.309712	0.00646475	0.0399009	0.101598	0.0235553	0.184386	0.135949	0.241827	0.311682	0.0761475	0.225513	0.335595	0.172113	0.280455	0.843627	0.574016	0.0456752	0.344307
Rab GTPase	GTPase	Rab	ENSG00000169228	RAB24	RAB24, member RAS oncogene family [Source:HGNC Symbol;Acc:HGNC:9765]	53917	0.327006	0.00720496	0.0415508	0.169584	0.0864899	0.252969	0.230483	0.0619382	0.157421	0.0842454	0.209754	0.32504	0.0377706	0.816089	0.905208	0.443998	0.129692	0.449845
Rho GTPase	GTPase	Rho	ENSG00000128340	RAC2	Rac family small GTPase 2 [Source:HGNC Symbol;Acc:HGNC:9802]	5880	0.314839	0.00757483	0.0426591	0.527783	0.000749354	0.0999067	0.0768074	0.524356	0.455102	0.0515499	0.429401	0.448845	-0.262389	0.103788	0.797065	-0.768165	0.00791361	0.22389
Arf GAPs	GAPs	Arf	ENSG00000114331	ACAP2	ArfGAP with coiled-coil, ankyrin repeat and PH domains 2 [Source:HGNC Symbol;Acc:HGNC:16469]	23527	0.312322	0.00842009	0.0448335	0.109356	0.0904912	0.256397	0.196525	0.102794	0.203157	0.101927	0.118077	0.257911	0.197064	0.206268	0.82629	0.284954	0.314991	0.571033
Ras GTPase	GTPase	Ras	ENSG00000144118	RALB	RAS like proto-oncogene B [Source:HGNC Symbol;Acc:HGNC:9840]	5899	0.309117	0.00857827	0.0451747	0.106898	0.0575147	0.2316	0.24957	0.0358308	0.116857	0.149042	0.0201738	0.117931	-0.319066	0.0433474	0.754722	-0.459244	0.110828	0.430666
Rho GEFs	GEFs	Rho	ENSG00000076928	ARHGEF1	Rho guanine nucleotide exchange factor 1 [Source:HGNC Symbol;Acc:HGNC:681]	9138	0.309522	0.00872461	0.0455705	0.128434	0.0835995	0.251558	0.238379	0.0459899	0.133571	0.108176	0.0953256	0.23554	-0.26738	0.0942611	0.779653	-0.275652	0.344711	0.584145
Rho GAPs	GAPs	Rho	ENSG00000004777	ARHGAP33	Rho GTPase activating protein 33 [Source:HGNC Symbol;Acc:HGNC:23085]	115703	-0.311247	0.00984624	0.0479916	-0.134897	0.234987	0.347403	-0.313201	0.00966968	0.0591538	-0.168995	0.00987967	0.0879354	-0.329981	0.0338555	0.725558	-0.172995	0.544892	0.667935
Rho GEFs	GEFs	Rho	ENSG00000134516	DOCK2	dedicator of cytokinesis 2 [Source:HGNC Symbol;Acc:HGNC:2988]	1794	0.304235	0.0102916	0.0488803	0.329998	9.2939e-05	0.0558657	0.16444	0.172875	0.262825	0.0693789	0.288854	0.37586	0.164346	0.29816	0.845772	0.561093	0.0486291	0.347155
Ras GTPase	GTPase	Ras	ENSG00000133818	RRAS2	RAS related 2 [Source:HGNC Symbol;Acc:HGNC:17271]	22800	0.287881	0.0103563	0.0490261	0.119083	0.0976062	0.262963	0.198028	0.0820311	0.178841	0.0944938	0.125841	0.265772	-0.0315355	0.841091	0.905208	-0.635642	0.023952	0.283807
Rho GEFs	GEFs	Rho	ENSG00000128512	DOCK4	dedicator of cytokinesis 4 [Source:HGNC Symbol;Acc:HGNC:19192]	9732	0.301105	0.0112919	0.0508489	0.330802	0.00643236	0.148845	0.0845208	0.486095	0.440223	0.0430336	0.512246	0.484053	0.425209	0.00762835	0.605959	0.678867	0.019549	0.27187
Rho GEFs	GEFs	Rho	ENSG00000132694	ARHGEF11	Rho guanine nucleotide exchange factor 11 [Source:HGNC Symbol;Acc:HGNC:14580]	9826	0.30255	0.0114713	0.0510807	0.0875191	0.275788	0.369639	0.319785	0.00765439	0.0529885	0.146044	0.0252384	0.128993	-0.297117	0.0598281	0.770375	-0.484338	0.0917483	0.411316
Ras GAPs	GAPs	Ras	ENSG00000145715	RASA1	RAS p21 protein activator 1 [Source:HGNC Symbol;Acc:HGNC:9871]	5921	0.289698	0.0132877	0.0547388	0.100228	0.0919944	0.25836	0.155464	0.19122	0.276002	0.0743216	0.248681	0.350504	-0.292143	0.0614724	0.770375	-0.415815	0.144238	0.464859
Arf GEFs	GEFs	Arf	ENSG00000124198	ARFGEF2	ADP ribosylation factor guanine nucleotide exchange factor 2 [Source:HGNC Symbol;Acc:HGNC:15853]	10564	0.299419	0.014113	0.0559585	0.0945024	0.207073	0.333639	0.17099	0.167621	0.257744	0.0734242	0.274431	0.366003	0.0493495	0.76013	0.896646	0.217311	0.458467	0.635692
Arf GAPs	GAPs	Arf	ENSG00000133612	AGAP3	ArfGAP with GTPase domain, ankyrin repeat and PH domain 3 [Source:HGNC Symbol;Acc:HGNC:16923]	116988	0.295566	0.014392	0.0563783	0.0676351	0.384707	0.421909	0.202288	0.0983186	0.198197	0.138084	0.0361394	0.153707	-0.246141	0.125435	0.798269	-0.222187	0.448495	0.633558
Rab GTPase	GTPase	Rab	ENSG00000175582	RAB6A	RAB6A, member RAS oncogene family [Source:HGNC Symbol;Acc:HGNC:9786]	5870	0.285958	0.0145604	0.0563783	0.118675	0.104605	0.269233	0.01842	0.877508	0.579038	0.000770489	0.990494	0.634049	0.187303	0.239527	0.835771	0.485062	0.0921005	0.412291
Rho GEFs	GEFs	Rho	ENSG00000115904	SOS1	SOS Ras/Rac guanine nucleotide exchange factor 1 [Source:HGNC Symbol;Acc:HGNC:11187]	6654	0.29249	0.0147006	0.0566887	0.136567	0.120043	0.279305	0.070179	0.566088	0.472211	0.0534063	0.419192	0.444602	-0.290081	0.0661402	0.770375	-0.836776	0.0030365	0.167478
Ras GEFs	GEFs	Ras	ENSG00000115904	SOS1	SOS Ras/Rac guanine nucleotide exchange factor 1 [Source:HGNC Symbol;Acc:HGNC:11187]	6654	0.29249	0.0147006	0.0566887	0.136567	0.120043	0.279305	0.070179	0.566088	0.472211	0.0534063	0.419192	0.444602	-0.290081	0.0661402	0.770375	-0.836776	0.0030365	0.167478
Rho GEFs	GEFs	Rho	ENSG00000159842	ABR	ABR activator of RhoGEF and GTPase [Source:HGNC Symbol;Acc:HGNC:81]	29	0.286283	0.0167417	0.0599733	0.265431	0.0678693	0.240196	-0.00884696	0.942243	0.597438	0.0357727	0.58789	0.513409	0.146847	0.335581	0.846995	-0.0402748	0.884658	0.758369
Ras GTPase	GTPase	Ras	ENSG00000158186	MRAS	muscle RAS oncogene homolog [Source:HGNC Symbol;Acc:HGNC:7227]	22808	0.287865	0.0180504	0.0617218	0.0718756	0.736507	0.549553	0.119901	0.332977	0.363138	0.107039	0.108525	0.247751	-0.0765863	0.621228	0.885285	-0.192143	0.494524	0.652001
Rho GTPase	GTPase	Rho	ENSG00000143878	RHOB	ras homolog family member B [Source:HGNC Symbol;Acc:HGNC:668]	388	-0.277813	0.0184982	0.0621773	-0.273741	0.0564375	0.23017	-0.155875	0.192884	0.277392	-0.049328	0.447764	0.457091	0.172336	0.280662	0.843627	0.698517	0.0146389	0.251853
Rab GTPase	GTPase	Rab	ENSG00000084733	RAB10	RAB10, member RAS oncogene family [Source:HGNC Symbol;Acc:HGNC:9759]	10890	0.276762	0.0192586	0.06327	0.153387	0.0296585	0.196282	0.0605633	0.615227	0.491138	0.00198629	0.975712	0.631401	0.287547	0.0674312	0.770375	0.394493	0.168809	0.484565
Rho GEFs	GEFs	Rho	ENSG00000160145	KALRN	kalirin RhoGEF kinase [Source:HGNC Symbol;Acc:HGNC:4814]	8997	-0.285683	0.01956	0.063622	-0.0986045	0.392955	0.425685	-0.272435	0.0268123	0.100931	-0.141988	0.0331159	0.148789	0.220316	0.169743	0.816199	0.713746	0.0131574	0.248832
Ras GTPase	GTPase	Ras	ENSG00000181467	RAP2B	RAP2B, member of RAS oncogene family [Source:HGNC Symbol;Acc:HGNC:9862]	5912	0.256829	0.0198286	0.0638908	0.214207	0.0284261	0.193686	-0.0062522	0.955642	0.601078	-0.00102656	0.986533	0.633159	0.218867	0.1702	0.816199	0.529	0.0667477	0.378716
Ras GEFs	GEFs	Ras	ENSG00000091428	RAPGEF4	Rap guanine nucleotide exchange factor 4 [Source:HGNC Symbol;Acc:HGNC:16626]	11069	-0.278784	0.020027	0.0641709	-0.164559	0.136696	0.292146	-0.43622	0.000206351	0.00950804	-0.213749	0.000849319	0.028794	-0.272794	0.0863056	0.77268	-0.248953	0.391644	0.606448
Arf GAPs	GAPs	Arf	ENSG00000101199	ARFGAP1	ADP ribosylation factor GTPase activating protein 1 [Source:HGNC Symbol;Acc:HGNC:15852]	55738	0.283002	0.0208002	0.0652336	0.154403	0.140536	0.294117	0.145427	0.242035	0.311839	0.078669	0.242134	0.345766	0.242803	0.118162	0.797116	0.749657	0.00707423	0.222568
Rab GTPase	GTPase	Rab	ENSG00000111737	RAB35	RAB35, member RAS oncogene family [Source:HGNC Symbol;Acc:HGNC:9774]	11021	0.282863	0.0207995	0.0652336	0.105804	0.160726	0.307817	0.181652	0.142838	0.239277	0.111552	0.0957002	0.235774	-0.205913	0.192574	0.822579	-0.338172	0.239015	0.531334
Rab GTPase	GTPase	Rab	ENSG00000167578	RAB4B	RAB4B, member RAS oncogene family [Source:HGNC Symbol;Acc:HGNC:9782]	53916	0.278163	0.0215634	0.0666379	0.105472	0.175407	0.317039	0.370586	0.00202746	0.027972	0.166982	0.0108256	0.0912054	0.285021	0.0756833	0.770375	0.624936	0.0312444	0.300114
Rab GTPase	GTPase	Rab	ENSG00000103769	RAB11A	RAB11A, member RAS oncogene family [Source:HGNC Symbol;Acc:HGNC:9760]	8766	0.275732	0.0220988	0.0672374	0.0787052	0.152983	0.302289	0.26457	0.0289251	0.105463	0.15752	0.0159127	0.106359	0.0789197	0.603848	0.883543	0.085203	0.757815	0.732553
Arf GTPase	GTPase	Arf	ENSG00000134108	ARL8B	ADP ribosylation factor like GTPase 8B [Source:HGNC Symbol;Acc:HGNC:25564]	55207	0.273409	0.0231634	0.0684627	0.180293	0.0202155	0.180619	0.0550203	0.653582	0.504451	0.0369628	0.577248	0.510085	-0.23078	0.14485	0.808638	-0.0657745	0.820041	0.746325
Rho GTPase	GTPase	Rho	ENSG00000115963	RND3	Rho family GTPase 3 [Source:HGNC Symbol;Acc:HGNC:671]	390	0.276823	0.0232495	0.0685842	0.357408	0.00851336	0.154326	-0.0972043	0.433305	0.415232	-0.058439	0.383757	0.427388	0.0759246	0.629411	0.885285	0.557718	0.048543	0.347055
Rho GEFs	GEFs	Rho	ENSG00000102606	ARHGEF7	Rho guanine nucleotide exchange factor 7 [Source:HGNC Symbol;Acc:HGNC:15607]	8874	0.27446	0.0238909	0.0696561	0.126335	0.076551	0.243846	0.126161	0.306592	0.348095	0.0623269	0.350793	0.410528	0.201807	0.20378	0.825564	0.415322	0.149222	0.470369
Arf GTPase	GTPase	Arf	ENSG00000143862	ARL8A	ADP ribosylation factor like GTPase 8A [Source:HGNC Symbol;Acc:HGNC:25192]	127829	0.262026	0.0260035	0.0725477	0.0207516	0.727773	0.546304	0.38685	0.000865845	0.0187995	0.219973	0.00044354	0.0242923	-0.012042	0.939572	0.914586	-0.174695	0.544323	0.667505
Arf GAPs	GAPs	Arf	ENSG00000120318	ARAP3	ArfGAP with RhoGAP domain, ankyrin repeat and PH domain 3 [Source:HGNC Symbol;Acc:HGNC:24097]	64411	0.267313	0.0262397	0.0727487	0.107091	0.298373	0.380506	0.0573445	0.639358	0.49922	0.0141033	0.831409	0.591467	-0.195875	0.219343	0.832394	-0.179104	0.537546	0.664449
Rab GAPs	GAPs	Rab	ENSG00000109436	TBC1D9	TBC1 domain family member 9 [Source:HGNC Symbol;Acc:HGNC:21710]	23158	0.269812	0.0269583	0.0736776	0.308717	0.0218237	0.183191	-0.0670701	0.588779	0.481967	-0.0416392	0.534947	0.492434	-0.0629987	0.698456	0.889626	-0.754227	0.0092469	0.233757
Arf GAPs	GAPs	Arf	ENSG00000173744	AGFG1	ArfGAP with FG repeats 1 [Source:HGNC Symbol;Acc:HGNC:5175]	3267	0.252794	0.027911	0.0751054	0.143232	0.0487544	0.221916	0.195148	0.0927792	0.192134	0.0830455	0.187514	0.310376	0.298537	0.0523592	0.76927	0.554626	0.0470257	0.344811
Arf GTPase	GTPase	Arf	ENSG00000188042	ARL4C	ADP ribosylation factor like GTPase 4C [Source:HGNC Symbol;Acc:HGNC:698]	10123	0.253937	0.0284119	0.0758906	0.369719	0.00412308	0.136804	-0.0377246	0.748979	0.536596	0.0208655	0.743585	0.56616	0.138628	0.352064	0.850281	0.276819	0.305877	0.566913
Ras GTPase	GTPase	Ras	ENSG00000162595	DIRAS3	DIRAS family GTPase 3 [Source:HGNC Symbol;Acc:HGNC:687]	9077	-0.261654	0.0285551	0.0759997	-0.248962	0.243605	0.352969	-0.339857	0.00423588	0.0386881	-0.147034	0.0233688	0.124753	0.285776	0.0736537	0.770375	0.0255434	0.93047	0.769401
Ras GTPase	GTPase	Ras	ENSG00000127314	RAP1B	RAP1B, member of RAS oncogene family [Source:HGNC Symbol;Acc:HGNC:9857]	5908	0.256138	0.0286942	0.0761491	0.208243	0.00133102	0.106713	-0.0328025	0.783049	0.548984	0.000185282	0.997707	0.635592	0.175305	0.273694	0.842326	0.666204	0.0204389	0.27187
Rab GTPase	GTPase	Rab	ENSG00000206418	RAB12	RAB12, member RAS oncogene family [Source:HGNC Symbol;Acc:HGNC:31332]	201475	0.267333	0.0290404	0.0763538	0.114145	0.0228603	0.184386	0.156072	0.208397	0.28829	0.0977276	0.144808	0.282039	-0.206413	0.192882	0.823189	-0.456909	0.111583	0.432358
Ras GEFs	GEFs	Ras	ENSG00000107263	RAPGEF1	Rap guanine nucleotide exchange factor 1 [Source:HGNC Symbol;Acc:HGNC:4568]	2889	0.262897	0.0296671	0.0771555	0.246962	0.023653	0.184514	0.125742	0.305271	0.347717	0.0548672	0.408855	0.439663	-0.0292157	0.857318	0.908046	-0.0449031	0.879049	0.757415
Arf GTPase	GTPase	Arf	ENSG00000175906	ARL4D	ADP ribosylation factor like GTPase 4D [Source:HGNC Symbol;Acc:HGNC:656]	379	-0.244055	0.0314667	0.0792517	-0.22432	0.31575	0.390078	-0.289727	0.0105442	0.0625345	-0.141892	0.021059	0.120095	-0.242416	0.122329	0.798269	-0.323945	0.257004	0.541526
Rho GAPs	GAPs	Rho	ENSG00000163219	ARHGAP25	Rho GTPase activating protein 25 [Source:HGNC Symbol;Acc:HGNC:28951]	9938	0.252734	0.0317256	0.07953	0.232114	0.0108593	0.156331	-0.0292218	0.807093	0.55729	0.033147	0.608503	0.520807	0.0917305	0.554133	0.874693	0.134782	0.632272	0.696075
Ras GTPase	GTPase	Ras	ENSG00000123728	RAP2C	RAP2C, member of RAS oncogene family [Source:HGNC Symbol;Acc:HGNC:21165]	57826	0.261244	0.0322732	0.0801086	0.095742	0.0543901	0.227255	0.196859	0.110094	0.209132	0.0966328	0.147708	0.28396	-0.269154	0.0942978	0.779653	-0.549621	0.0593419	0.36516
Arf GTPase	GTPase	Arf	ENSG00000152700	SAR1B	secretion associated Ras related GTPase 1B [Source:HGNC Symbol;Acc:HGNC:10535]	51128	-0.257919	0.0348492	0.0827249	-0.090113	0.247487	0.355369	-0.32187	0.00824738	0.0551226	-0.112716	0.0910328	0.230529	-0.120342	0.427265	0.859198	0.00940956	0.972779	0.776063
Rho GEFs	GEFs	Rho	ENSG00000141968	VAV1	vav guanine nucleotide exchange factor 1 [Source:HGNC Symbol;Acc:HGNC:12657]	7409	0.252508	0.0362781	0.0845492	0.531856	7.60356e-05	0.0557554	-0.0340967	0.780869	0.548401	-0.0305221	0.645211	0.534872	0.155269	0.320568	0.845772	0.215906	0.447394	0.632545
Rho GEFs	GEFs	Rho	ENSG00000147459	DOCK5	dedicator of cytokinesis 5 [Source:HGNC Symbol;Acc:HGNC:23476]	80005	0.25441	0.036457	0.0848102	0.0713991	0.641851	0.518859	0.287479	0.0181539	0.0815784	0.146989	0.0258376	0.1312	0.309327	0.0504584	0.76927	0.431372	0.134787	0.455589
Rab GTPase	GTPase	Rab	ENSG00000129472	RAB2B	RAB2B, member RAS oncogene family [Source:HGNC Symbol;Acc:HGNC:20246]	84932	0.25307	0.0377986	0.0865314	0.0936894	0.291216	0.376487	-0.0853442	0.49012	0.441346	-0.0535584	0.423237	0.44596	-0.123535	0.426034	0.859031	-0.263869	0.348754	0.585728
Rho GAPs	GAPs	Rho	ENSG00000146376	ARHGAP18	Rho GTPase activating protein 18 [Source:HGNC Symbol;Acc:HGNC:21035]	93663	0.242833	0.0390366	0.0880225	0.202061	0.0327672	0.200889	0.189241	0.110887	0.210237	0.122684	0.0553237	0.185398	0.260661	0.0967162	0.78443	0.633913	0.0251646	0.289669
Arf GTPase	GTPase	Arf	ENSG00000120805	ARL1	ADP ribosylation factor like GTPase 1 [Source:HGNC Symbol;Acc:HGNC:692]	400	0.245296	0.0444196	0.0939449	0.132422	0.0434683	0.215562	-0.0401051	0.746161	0.535538	-0.0219994	0.742773	0.565945	0.182853	0.236082	0.834814	0.202854	0.470255	0.642483
Rho GEFs	GEFs	Rho	ENSG00000124126	PREX1	phosphatidylinositol-3,4,5-trisphosphate dependent Rac exchange factor 1 [Source:HGNC Symbol;Acc:HGNC:32594]	57580	0.233801	0.0457831	0.0953255	0.262657	0.00971622	0.155179	0.0829522	0.484624	0.43978	0.0642198	0.316601	0.390463	0.102053	0.52097	0.8698	0.511029	0.0744099	0.388521
Rab GTPase	GTPase	Rab	ENSG00000167964	RAB26	RAB26, member RAS oncogene family [Source:HGNC Symbol;Acc:HGNC:14259]	25837	-0.237912	0.0464691	0.0959777	-0.21011	0.315281	0.389864	-0.0677265	0.576339	0.476669	-0.0435804	0.506213	0.481128	0.2467	0.118368	0.797116	0.277733	0.335013	0.581015
Arf GAPs	GAPs	Arf	ENSG00000112305	SMAP1	small ArfGAP 1 [Source:HGNC Symbol;Acc:HGNC:19651]	60682	0.240522	0.0481541	0.0974512	0.104535	0.262051	0.363311	-0.0210396	0.864789	0.575459	-0.00639422	0.923806	0.618222	0.252757	0.115045	0.797116	0.282245	0.334615	0.581015
Rho GAPs	GAPs	Rho	ENSG00000107863	ARHGAP21	Rho GTPase activating protein 21 [Source:HGNC Symbol;Acc:HGNC:23725]	57584	0.227353	0.0576163	0.107442	0.130078	0.0542479	0.227178	0.21149	0.078984	0.17659	0.0809753	0.215877	0.329578	0.0966317	0.55035	0.874639	0.539537	0.0639383	0.373935
Rab GTPase	GTPase	Rab	ENSG00000144134	RABL2A	RAB, member of RAS oncogene family like 2A [Source:HGNC Symbol;Acc:HGNC:9799]	11159	-0.23275	0.0587178	0.108321	-0.0909994	0.344549	0.403124	-0.0595454	0.633266	0.496968	-0.0675765	0.315854	0.390142	-0.0740252	0.63878	0.885285	-0.154178	0.590213	0.682212
Rho GEFs	GEFs	Rho	ENSG00000170776	AKAP13	A-kinase anchoring protein 13 [Source:HGNC Symbol;Acc:HGNC:371]	11214	0.229556	0.0595963	0.109241	0.153291	0.0576979	0.23167	0.122878	0.318709	0.354655	0.0205111	0.758974	0.571086	0.176393	0.257286	0.841179	0.12155	0.66825	0.705796
Rho GEFs	GEFs	Rho	ENSG00000130158	DOCK6	dedicator of cytokinesis 6 [Source:HGNC Symbol;Acc:HGNC:19189]	57572	0.230573	0.0599173	0.10937	0.12551	0.316443	0.390291	0.0868341	0.484146	0.439511	0.0623883	0.352339	0.411345	-0.150444	0.338131	0.846995	-0.123045	0.666802	0.705456
Rho GTPase	GTPase	Rho	ENSG00000172602	RND1	Rho family GTPase 1 [Source:HGNC Symbol;Acc:HGNC:18314]	27289	0.229006	0.0618812	0.110855	0.721811	0.038742	0.21009	0.320548	0.0085736	0.0558588	0.119538	0.0729966	0.20812	0.0892761	0.574452	0.878703	0.926462	0.000943197	0.132253
Arf GAPs	GAPs	Arf	ENSG00000072818	ACAP1	ArfGAP with coiled-coil, ankyrin repeat and PH domains 1 [Source:HGNC Symbol;Acc:HGNC:16467]	9744	0.22721	0.0631837	0.111775	0.421627	0.0194455	0.179482	0.0175871	0.887198	0.58211	0.0154417	0.817929	0.588197	-0.0797347	0.620291	0.885285	-0.218565	0.454106	0.634866
Rab GTPase	GTPase	Rab	ENSG00000079974	RABL2B	RAB, member of RAS oncogene family like 2B [Source:HGNC Symbol;Acc:HGNC:9800]	11158	0.224584	0.0656415	0.113463	0.15554	0.0272356	0.191215	0.0823979	0.504693	0.446845	0.0560109	0.401605	0.436441	-0.17082	0.26557	0.841179	-0.0825777	0.76767	0.73507
Ras GTPase	GTPase	Ras	ENSG00000133703	KRAS	KRAS proto-oncogene, GTPase [Source:HGNC Symbol;Acc:HGNC:6407]	3845	0.226036	0.0673584	0.115187	0.0114071	0.882187	0.594808	0.384203	0.00160254	0.0245358	0.16401	0.0138005	0.100432	-0.164696	0.286284	0.845772	-0.229119	0.414591	0.618756
Rho GEFs	GEFs	Rho	ENSG00000130762	ARHGEF16	Rho guanine nucleotide exchange factor 16 [Source:HGNC Symbol;Acc:HGNC:15515]	27237	0.221815	0.0700343	0.117359	0.017412	0.768332	0.559987	0.12707	0.304308	0.347257	0.0529404	0.429519	0.448845	0.141011	0.381039	0.854871	0.7026	0.0147129	0.251853
Ras GTPase	GTPase	Ras	ENSG00000213281	NRAS	NRAS proto-oncogene, GTPase [Source:HGNC Symbol;Acc:HGNC:7989]	4893	0.216553	0.0701094	0.117417	0.132161	0.0735136	0.242396	0.0406401	0.737228	0.5326	0.0102817	0.875364	0.605218	-0.271291	0.0753837	0.770375	-0.496871	0.0728481	0.386849
Arf GAPs	GAPs	Arf	ENSG00000106351	AGFG2	ArfGAP with FG repeats 2 [Source:HGNC Symbol;Acc:HGNC:5177]	3268	-0.219714	0.0709929	0.118384	-0.199516	0.0991715	0.263958	-0.0659035	0.592726	0.483326	-0.014972	0.822417	0.589394	-0.00596703	0.969151	0.916805	0.153818	0.582674	0.679624
Rab GTPase	GTPase	Rab	ENSG00000108774	RAB5C	RAB5C, member RAS oncogene family [Source:HGNC Symbol;Acc:HGNC:9785]	5878	0.217874	0.0739919	0.121103	0.0261575	0.643068	0.51918	0.318159	0.00863408	0.0560016	0.1843	0.0048017	0.0627642	-0.0935097	0.555241	0.874693	0.0490035	0.864933	0.756142
Rab GEFs	GEFs	Rab	ENSG00000154710	RABGEF1	RAB guanine nucleotide exchange factor 1 [Source:HGNC Symbol;Acc:HGNC:17676]	27342	0.215462	0.0747892	0.121693	0.219011	0.0602303	0.2353	-0.117709	0.335355	0.36479	-0.0684323	0.3004	0.381478	-0.0265726	0.868571	0.909836	0.0148666	0.959341	0.773747
Rho GEFs	GEFs	Rho	ENSG00000146192	FGD2	FYVE, RhoGEF and PH domain containing 2 [Source:HGNC Symbol;Acc:HGNC:3664]	221472	-0.212692	0.0773179	0.123392	-0.149869	0.0787924	0.245402	-0.030384	0.803226	0.556178	0.0243926	0.711535	0.55529	-0.22059	0.159918	0.814915	-0.367066	0.1982	0.501616
Rho GAPs	GAPs	Rho	ENSG00000031003	FAM13B	family with sequence similarity 13 member B [Source:HGNC Symbol;Acc:HGNC:1335]	51306	0.214055	0.0784739	0.124166	0.181025	0.121689	0.280253	-0.141614	0.248609	0.315502	-0.0716509	0.280871	0.37004	-0.154731	0.328097	0.845772	-0.124409	0.665681	0.705241
Rab GTPase	GTPase	Rab	ENSG00000157869	RAB28	RAB28, member RAS oncogene family [Source:HGNC Symbol;Acc:HGNC:9768]	9364	0.215993	0.07923	0.124682	0.0592812	0.493718	0.464981	0.0996239	0.423256	0.411253	0.0494568	0.46263	0.463796	0.243856	0.122326	0.798269	0.42985	0.133792	0.454617
Ras GAPs	GAPs	Ras	ENSG00000213445	SIPA1	signal-induced proliferation-associated 1 [Source:HGNC Symbol;Acc:HGNC:10885]	6494	0.207282	0.0842183	0.128901	0.042313	0.647427	0.520497	0.273094	0.0225884	0.0920438	0.11066	0.0897826	0.229429	-0.118692	0.451651	0.864227	-0.165731	0.562996	0.672641
Arf GAPs	GAPs	Arf	ENSG00000242247	ARFGAP3	ADP ribosylation factor GTPase activating protein 3 [Source:HGNC Symbol;Acc:HGNC:661]	26286	0.20846	0.0857331	0.130009	0.214235	0.0264957	0.189538	-0.101586	0.40726	0.403411	-0.0665353	0.315329	0.389998	0.1932	0.229784	0.832847	0.312771	0.284721	0.555862
Rho GTPase	GTPase	Rho	ENSG00000119729	RHOQ	ras homolog family member Q [Source:HGNC Symbol;Acc:HGNC:17736]	23433	0.206599	0.0873676	0.131147	0.157277	0.200958	0.331745	-0.059797	0.624788	0.494329	-0.0504886	0.444892	0.455587	-0.115269	0.472861	0.866708	-0.520859	0.071821	0.385511
Rho GEFs	GEFs	Rho	ENSG00000107099	DOCK8	dedicator of cytokinesis 8 [Source:HGNC Symbol;Acc:HGNC:19191]	81704	0.204274	0.0881246	0.131734	0.282535	0.00573824	0.14869	0.0113347	0.925523	0.593098	0.0100857	0.877816	0.605738	0.14308	0.374321	0.854871	0.183303	0.531252	0.662262
Rho GEFs	GEFs	Rho	ENSG00000154783	FGD5	FYVE, RhoGEF and PH domain containing 5 [Source:HGNC Symbol;Acc:HGNC:19117]	152273	0.19517	0.100935	0.141604	0.077503	0.352949	0.406223	0.237201	0.0462609	0.13392	0.163913	0.01034	0.0895847	0.038657	0.809233	0.904875	-0.11515	0.692	0.71444
Rho GTPase	GTPase	Rho	ENSG00000067560	RHOA	ras homolog family member A [Source:HGNC Symbol;Acc:HGNC:667]	387	0.194085	0.101033	0.141604	0.0508924	0.393124	0.425717	0.0910189	0.446403	0.421538	0.0860833	0.181697	0.306033	0.0503045	0.741575	0.893752	0.418057	0.12882	0.449177
Rho GAPs	GAPs	Rho	ENSG00000138640	FAM13A	family with sequence similarity 13 member A [Source:HGNC Symbol;Acc:HGNC:19367]	10144	-0.193987	0.101625	0.142157	-0.152739	0.420858	0.435305	-0.272213	0.0211488	0.089283	-0.135387	0.0345129	0.150551	-0.0988731	0.534721	0.870651	-0.355005	0.218119	0.517552
Ras GTPase	GTPase	Ras	ENSG00000006451	RALA	RAS like proto-oncogene A [Source:HGNC Symbol;Acc:HGNC:9839]	5898	0.194115	0.103018	0.142876	0.135667	0.165453	0.311256	0.116707	0.331235	0.362282	0.083125	0.199981	0.320253	-0.0807558	0.617705	0.885285	-0.306585	0.295544	0.561762
Rho GEFs	GEFs	Rho	ENSG00000126217	MCF2L	MCF.2 cell line derived transforming sequence like [Source:HGNC Symbol;Acc:HGNC:14576]	23263	-0.189697	0.108067	0.146769	-0.159116	0.115006	0.276976	0.0440792	0.711868	0.523952	0.0531376	0.409829	0.440211	-0.128802	0.415215	0.858352	-0.196137	0.494679	0.652112
Arf GAPs	GAPs	Arf	ENSG00000172650	AGAP5	ArfGAP with GTPase domain, ankyrin repeat and PH domain 5 [Source:HGNC Symbol;Acc:HGNC:23467]	729092	0.19662	0.111561	0.149575	0.0867032	0.307865	0.385373	0.0459951	0.712691	0.524068	-0.0123848	0.854636	0.598449	0.073266	0.644255	0.885285	0.363964	0.204682	0.506598
Ras GAPs	GAPs	Ras	ENSG00000196712	NF1	neurofibromin 1 [Source:HGNC Symbol;Acc:HGNC:7765]	4763	0.192051	0.115312	0.152161	0.160004	0.0814932	0.248755	0.0215791	0.861064	0.574214	-0.0199154	0.765257	0.573214	-0.0178313	0.910369	0.914586	0.168348	0.557966	0.670728
Rho GEFs	GEFs	Rho	ENSG00000066248	NGEF	neuronal guanine nucleotide exchange factor [Source:HGNC Symbol;Acc:HGNC:7807]	25791	-0.18955	0.124793	0.158605	-0.0874232	0.518286	0.475733	-0.00842708	0.946168	0.59843	-0.0142784	0.832527	0.591652	-0.153862	0.314322	0.845772	-0.179967	0.517599	0.658613
Rho GEFs	GEFs	Rho	ENSG00000116584	ARHGEF2	Rho/Rac guanine nucleotide exchange factor 2 [Source:HGNC Symbol;Acc:HGNC:682]	9181	0.185807	0.125446	0.159014	0.377456	0.0407663	0.211858	-0.163079	0.181072	0.26936	-0.100535	0.126951	0.266416	0.142169	0.375256	0.854871	0.642221	0.0255942	0.290536
Rho GEFs	GEFs	Rho	ENSG00000142632	ARHGEF19	Rho guanine nucleotide exchange factor 19 [Source:HGNC Symbol;Acc:HGNC:26604]	128272	0.185128	0.127262	0.160363	0.118126	0.475707	0.458818	-0.018406	0.880738	0.58007	-0.0367864	0.579129	0.511326	0.0213871	0.892861	0.912188	0.0117011	0.967631	0.774881
Ras GTPase	GTPase	Ras	ENSG00000143622	RIT1	Ras like without CAAX 1 [Source:HGNC Symbol;Acc:HGNC:10023]	6016	0.186329	0.128264	0.161098	0.133354	0.310952	0.386908	0.0128341	0.917433	0.591128	0.00864215	0.897341	0.611062	0.217397	0.178354	0.816199	0.574765	0.0487056	0.347431
Rho GEFs	GEFs	Rho	ENSG00000150760	DOCK1	dedicator of cytokinesis 1 [Source:HGNC Symbol;Acc:HGNC:2987]	1793	0.178678	0.135568	0.16581	0.116846	0.185478	0.322721	0.22648	0.0585423	0.152465	0.0993725	0.126368	0.266153	-0.00810463	0.959532	0.916192	-0.142698	0.622478	0.69385
Rab GTPase	GTPase	Rab	ENSG00000166128	RAB8B	RAB8B, member RAS oncogene family [Source:HGNC Symbol;Acc:HGNC:30273]	51762	0.17785	0.13907	0.168039	0.329624	0.0132258	0.16257	-0.173921	0.149744	0.244851	-0.0839464	0.199346	0.319752	0.277054	0.0710352	0.770375	0.37168	0.184152	0.493565
Arf GAPs	GAPs	Arf	ENSG00000153317	ASAP1	ArfGAP with SH3 domain, ankyrin repeat and PH domain 1 [Source:HGNC Symbol;Acc:HGNC:2720]	50807	0.178232	0.141391	0.169564	0.191516	0.0362663	0.20615	0.0342031	0.779906	0.548141	0.0048795	0.941277	0.623333	-0.0698906	0.655963	0.886576	-0.220577	0.438222	0.629893
Rho GAPs	GAPs	Rho	ENSG00000123329	ARHGAP9	Rho GTPase activating protein 9 [Source:HGNC Symbol;Acc:HGNC:14130]	64333	0.171138	0.144132	0.171218	0.263926	0.0386026	0.209998	0.0687805	0.560758	0.470031	0.0730824	0.251977	0.353221	0.133764	0.406233	0.858212	0.484889	0.0953252	0.413609
Rab GAPs	GAPs	Rab	ENSG00000141258	SGSM2	small G protein signaling modulator 2 [Source:HGNC Symbol;Acc:HGNC:29026]	9905	0.174566	0.146634	0.172547	0.0659411	0.530938	0.480472	0.0828715	0.4945	0.442814	0.0586796	0.370837	0.421089	-0.0706957	0.654684	0.886163	0.184449	0.520193	0.658826
Arf GTPase	GTPase	Arf	ENSG00000138175	ARL3	ADP ribosylation factor like GTPase 3 [Source:HGNC Symbol;Acc:HGNC:694]	403	-0.175267	0.154616	0.177551	-0.111385	0.18351	0.321462	-0.275514	0.0245743	0.0959923	-0.12075	0.0700134	0.20508	0.286697	0.0723063	0.770375	0.207041	0.478188	0.644797
Rho GTPase	GTPase	Rho	ENSG00000169750	RAC3	Rac family small GTPase 3 [Source:HGNC Symbol;Acc:HGNC:9803]	5881	-0.16445	0.160053	0.180726	-0.252243	0.0771253	0.244433	-0.105847	0.369342	0.383812	-0.0399751	0.531401	0.491128	-0.0973588	0.457768	0.865416	-0.22744	0.338931	0.582218
Rab GTPase	GTPase	Rab	ENSG00000143545	RAB13	RAB13, member RAS oncogene family [Source:HGNC Symbol;Acc:HGNC:9762]	5872	0.170131	0.161398	0.181363	0.160799	0.0154543	0.170574	0.0222714	0.855898	0.572371	-0.0271171	0.682675	0.546448	-0.0364852	0.817838	0.905208	-0.268927	0.348672	0.585728
Arf GTPase	GTPase	Arf	ENSG00000168374	ARF4	ADP ribosylation factor 4 [Source:HGNC Symbol;Acc:HGNC:655]	378	0.16518	0.166724	0.185073	0.0771799	0.308224	0.385559	-0.0914849	0.447277	0.422052	-0.0284198	0.662947	0.539478	0.0292148	0.848865	0.906901	-0.152128	0.584447	0.680147
Ras GAPs	GAPs	Ras	ENSG00000103197	TSC2	TSC complex subunit 2 [Source:HGNC Symbol;Acc:HGNC:12363]	7249	0.167681	0.166995	0.185164	-0.0818825	0.41559	0.433407	0.266922	0.0271222	0.10138	0.159309	0.0144808	0.101892	-0.112209	0.488111	0.869318	0.204969	0.485506	0.646582
Ras GEFs	GEFs	Ras	ENSG00000158987	RAPGEF6	Rap guanine nucleotide exchange factor 6 [Source:HGNC Symbol;Acc:HGNC:20655]	51735	0.164877	0.172225	0.188099	0.0996989	0.16237	0.309091	-0.119906	0.323962	0.358253	-0.0562409	0.39285	0.432444	0.111451	0.48869	0.869318	-0.166566	0.568929	0.67452
Rho GEFs	GEFs	Rho	ENSG00000182957	SPATA13	spermatogenesis associated 13 [Source:HGNC Symbol;Acc:HGNC:23222]	221178	0.16608	0.175017	0.189925	0.057172	0.485604	0.462512	0.185939	0.129917	0.228627	0.0791548	0.234616	0.341012	-0.11496	0.476628	0.867059	-0.552757	0.0572451	0.363146
Rho GEFs	GEFs	Rho	ENSG00000050327	ARHGEF5	Rho guanine nucleotide exchange factor 5 [Source:HGNC Symbol;Acc:HGNC:13209]	7984	0.165774	0.179969	0.192793	0.0636896	0.619307	0.511576	0.233197	0.0589902	0.153187	0.0664735	0.323397	0.395121	-0.131983	0.411627	0.858212	-0.586811	0.0423383	0.334857
Rab GTPase	GTPase	Rab	ENSG00000138069	RAB1A	RAB1A, member RAS oncogene family [Source:HGNC Symbol;Acc:HGNC:9758]	5861	0.163393	0.181372	0.193611	0.0483873	0.371042	0.416085	-0.115451	0.34812	0.372348	-0.02284	0.732117	0.561926	0.0885909	0.581339	0.880652	0.811335	0.00446542	0.191863
Rab GTPase	GTPase	Rab	ENSG00000109113	RAB34	RAB34, member RAS oncogene family [Source:HGNC Symbol;Acc:HGNC:16519]	83871	0.161011	0.18323	0.194872	0.247371	0.132489	0.28743	-0.0983839	0.419414	0.409756	-0.0239185	0.717154	0.557118	-0.070496	0.66036	0.887384	-0.151821	0.602173	0.68596
Rab GTPase	GTPase	Rab	ENSG00000112210	RAB23	RAB23, member RAS oncogene family [Source:HGNC Symbol;Acc:HGNC:14263]	51715	0.156442	0.184898	0.195815	0.0354969	0.732273	0.547864	0.0150719	0.899258	0.585655	0.0201195	0.754724	0.569891	0.223642	0.149981	0.814915	0.186052	0.511518	0.656691
Rab GTPase	GTPase	Rab	ENSG00000123595	RAB9A	RAB9A, member RAS oncogene family [Source:HGNC Symbol;Acc:HGNC:9792]	9367	0.15941	0.186441	0.196547	0.151949	0.0293961	0.195915	-0.120685	0.320148	0.355511	-0.0553316	0.399934	0.435722	-0.0327378	0.839739	0.905208	0.188996	0.519817	0.658697
Ras GEFs	GEFs	Ras	ENSG00000109756	RAPGEF2	Rap guanine nucleotide exchange factor 2 [Source:HGNC Symbol;Acc:HGNC:16854]	9693	0.158585	0.197133	0.202349	0.190327	0.0722242	0.242149	0.0455207	0.713502	0.524246	0.0323	0.630065	0.529425	-0.163522	0.304037	0.845772	-0.298136	0.302057	0.565719
Rho GEFs	GEFs	Rho	ENSG00000213214	ARHGEF35	Rho guanine nucleotide exchange factor 35 [Source:HGNC Symbol;Acc:HGNC:33846]	445328	-0.158199	0.197207	0.202362	-0.209977	0.210199	0.335222	-0.00493019	0.96822	0.603815	-0.0685614	0.304381	0.383475	0.231546	0.144421	0.808638	0.599015	0.0363718	0.318327
Rho GEFs	GEFs	Rho	ENSG00000156299	TIAM1	TIAM Rac1 associated GEF 1 [Source:HGNC Symbol;Acc:HGNC:11805]	7074	0.157194	0.199351	0.203372	0.116489	0.05996	0.234646	0.00669377	0.956791	0.601294	-0.0237936	0.721782	0.558646	-0.283264	0.071972	0.770375	0.0417001	0.885072	0.758477
Arf GEFs	GEFs	Arf	ENSG00000066777	ARFGEF1	ADP ribosylation factor guanine nucleotide exchange factor 1 [Source:HGNC Symbol;Acc:HGNC:15772]	10565	0.154289	0.200413	0.20396	0.00793815	0.923281	0.603945	0.21624	0.0725731	0.170811	0.123723	0.05733	0.187426	-0.104489	0.518165	0.8698	0.336602	0.250416	0.53746
Ras GAPs	GAPs	Ras	ENSG00000175463	TBC1D10C	TBC1 domain family member 10C [Source:HGNC Symbol;Acc:HGNC:24702]	374403	0.148571	0.204455	0.206243	0.334097	0.000651464	0.0955411	0.037784	0.748916	0.536596	0.0421915	0.508489	0.482008	0.075804	0.635384	0.885285	0.138757	0.632652	0.696174
Rho GEFs	GEFs	Rho	ENSG00000160293	VAV2	vav guanine nucleotide exchange factor 2 [Source:HGNC Symbol;Acc:HGNC:12658]	7410	0.151513	0.210357	0.208698	-0.026127	0.795606	0.568747	0.459003	8.48606e-05	0.00691237	0.193527	0.00262597	0.0488042	0.183823	0.243277	0.839516	0.53282	0.0609254	0.367825
Rho GEFs	GEFs	Rho	ENSG00000100485	SOS2	SOS Ras/Rho guanine nucleotide exchange factor 2 [Source:HGNC Symbol;Acc:HGNC:11188]	6655	0.151938	0.213407	0.210569	0.0488648	0.342477	0.40239	0.0767326	0.53273	0.458046	0.0409408	0.538446	0.493998	0.243893	0.117431	0.797116	0.311914	0.271855	0.547759
Ras GEFs	GEFs	Ras	ENSG00000100485	SOS2	SOS Ras/Rho guanine nucleotide exchange factor 2 [Source:HGNC Symbol;Acc:HGNC:11188]	6655	0.151938	0.213407	0.210569	0.0488648	0.342477	0.40239	0.0767326	0.53273	0.458046	0.0409408	0.538446	0.493998	0.243893	0.117431	0.797116	0.311914	0.271855	0.547759
Arf GTPase	GTPase	Arf	ENSG00000113595	TRIM23	tripartite motif containing 23 [Source:HGNC Symbol;Acc:HGNC:660]	373	0.151823	0.213649	0.21063	0.066631	0.303969	0.383193	0.0944996	0.441946	0.419423	0.0400731	0.547015	0.497727	0.0500204	0.752854	0.895421	0.19941	0.488899	0.648445
Arf GTPase	GTPase	Arf	ENSG00000101246	ARFRP1	ADP ribosylation factor related protein 1 [Source:HGNC Symbol;Acc:HGNC:662]	10139	0.146867	0.226	0.217332	0.00549239	0.928268	0.605568	0.202107	0.0957613	0.195452	0.045489	0.4912	0.475717	0.168889	0.289923	0.845772	0.0820423	0.777729	0.737594
Rho GAPs	GAPs	Rho	ENSG00000100852	ARHGAP5	Rho GTPase activating protein 5 [Source:HGNC Symbol;Acc:HGNC:675]	394	0.147831	0.228114	0.218453	0.0703778	0.310816	0.386908	0.00384798	0.975175	0.605839	0.00186391	0.977774	0.631857	0.153687	0.310852	0.845772	0.437417	0.110626	0.430666
Rho GEFs	GEFs	Rho	ENSG00000196914	ARHGEF12	Rho guanine nucleotide exchange factor 12 [Source:HGNC Symbol;Acc:HGNC:14193]	23365	0.146342	0.229931	0.219427	-0.028766	0.742657	0.551581	0.306997	0.010937	0.063863	0.129824	0.0483321	0.174122	0.0671235	0.67762	0.887384	0.154891	0.597185	0.684814
Rho GAPs	GAPs	Rho	ENSG00000213390	ARHGAP19	Rho GTPase activating protein 19 [Source:HGNC Symbol;Acc:HGNC:23724]	84986	0.144595	0.235991	0.222469	0.016561	0.714329	0.542304	0.146869	0.230492	0.304108	0.0905668	0.171219	0.301023	0.117514	0.447269	0.862184	0.51084	0.0666701	0.378716
Arf GTPase	GTPase	Arf	ENSG00000143761	ARF1	ADP ribosylation factor 1 [Source:HGNC Symbol;Acc:HGNC:652]	375	0.145386	0.239465	0.224217	0.052491	0.219659	0.339479	-0.0795373	0.522672	0.454305	-0.0347744	0.605627	0.519756	-0.0448906	0.775304	0.900492	-0.194635	0.495033	0.652154
Rab GEFs	GEFs	Rab	ENSG00000127328	RAB3IP	RAB3A interacting protein [Source:HGNC Symbol;Acc:HGNC:16508]	117177	0.138673	0.24014	0.224593	0.175259	0.0789137	0.245402	-0.0109633	0.926588	0.593238	-0.000897688	0.988875	0.633646	0.102761	0.52028	0.8698	-0.406559	0.159402	0.478198
Rho GEFs	GEFs	Rho	ENSG00000088387	DOCK9	dedicator of cytokinesis 9 [Source:HGNC Symbol;Acc:HGNC:14132]	23348	0.142679	0.248417	0.229282	0.066916	0.668619	0.526962	-0.0509756	0.682258	0.514145	-0.0424136	0.528723	0.490297	-0.0550297	0.732154	0.892434	0.714645	0.0127547	0.246801
Arf GAPs	GAPs	Arf	ENSG00000204149	AGAP6	ArfGAP with GTPase domain, ankyrin repeat and PH domain 6 [Source:HGNC Symbol;Acc:HGNC:23466]	414189	0.139149	0.25612	0.232793	0.0619798	0.633646	0.516047	-0.0193171	0.875668	0.578569	0.0076273	0.909097	0.613724	0.0157405	0.920584	0.914586	0.0338312	0.906059	0.764505
Arf GAPs	GAPs	Arf	ENSG00000157985	AGAP1	ArfGAP with GTPase domain, ankyrin repeat and PH domain 1 [Source:HGNC Symbol;Acc:HGNC:16922]	116987	0.135189	0.255913	0.232793	0.0788799	0.401988	0.428881	-0.05625	0.638768	0.499073	-0.0298148	0.645626	0.534974	0.0543285	0.735032	0.892666	0.302305	0.298344	0.563984
Ras GAPs	GAPs	Ras	ENSG00000136895	GARNL3	GTPase activating Rap/RanGAP domain like 3 [Source:HGNC Symbol;Acc:HGNC:25425]	84253	-0.133082	0.268878	0.239118	-0.12331	0.227092	0.343203	-0.295046	0.0132904	0.070272	-0.100477	0.123112	0.263153	-0.171281	0.280337	0.843627	-0.380733	0.185576	0.493572
Rho GEFs	GEFs	Rho	ENSG00000104728	ARHGEF10	Rho guanine nucleotide exchange factor 10 [Source:HGNC Symbol;Acc:HGNC:14103]	9639	0.135259	0.276475	0.242108	0.0848871	0.387009	0.423246	-0.121185	0.331783	0.362566	-0.0231278	0.732708	0.562055	0.0400897	0.801998	0.904654	0.344053	0.234138	0.528049
Rho GEFs	GEFs	Rho	ENSG00000038382	TRIO	trio Rho guanine nucleotide exchange factor [Source:HGNC Symbol;Acc:HGNC:12303]	7204	0.132368	0.281706	0.244947	0.128982	0.207377	0.333639	-0.122908	0.319658	0.355242	-0.0566313	0.397105	0.433902	-0.260535	0.102353	0.794164	-0.411232	0.156389	0.475696
Rho GEFs	GEFs	Rho	ENSG00000198399	ITSN2	intersectin 2 [Source:HGNC Symbol;Acc:HGNC:6184]	50618	0.129209	0.28437	0.245905	0.0841031	0.250383	0.357062	-0.0275793	0.820502	0.561319	-0.0085248	0.896874	0.611009	-0.0267761	0.866812	0.909836	-0.664609	0.0199167	0.27187
Arf GTPase	GTPase	Arf	ENSG00000122644	ARL4A	ADP ribosylation factor like GTPase 4A [Source:HGNC Symbol;Acc:HGNC:695]	10124	-0.129506	0.287559	0.247378	-0.0686415	0.422704	0.435664	-0.228814	0.0594895	0.153872	-0.0919929	0.163333	0.295592	-0.0152465	0.924052	0.914586	0.0411909	0.887204	0.759279
Rab GTPase	GTPase	Rab	ENSG00000168461	RAB31	RAB31, member RAS oncogene family [Source:HGNC Symbol;Acc:HGNC:9771]	11031	0.128411	0.293783	0.250627	0.154586	0.148963	0.300079	0.0556963	0.650974	0.503413	0.0395564	0.552446	0.499122	0.0503216	0.753455	0.895421	0.500502	0.0827854	0.401695
Rho GEFs	GEFs	Rho	ENSG00000131089	ARHGEF9	Cdc42 guanine nucleotide exchange factor 9 [Source:HGNC Symbol;Acc:HGNC:14561]	23229	-0.126841	0.297624	0.252336	-0.0751364	0.419098	0.434799	-0.273539	0.0236273	0.0942327	-0.125102	0.0567943	0.186243	-0.102602	0.526508	0.870356	-0.38857	0.184816	0.493565
Rho GEFs	GEFs	Rho	ENSG00000183111	ARHGEF37	Rho guanine nucleotide exchange factor 37 [Source:HGNC Symbol;Acc:HGNC:34430]	389337	-0.124885	0.302052	0.254605	-0.0233231	0.671557	0.527983	-0.188478	0.119355	0.218691	-0.104006	0.112081	0.252017	0.138337	0.385662	0.854871	0.278255	0.336332	0.581261
Rab GTPase	GTPase	Rab	ENSG00000069974	RAB27A	RAB27A, member RAS oncogene family [Source:HGNC Symbol;Acc:HGNC:9766]	5873	0.122215	0.323943	0.265279	0.105478	0.401631	0.428563	0.368368	0.00243674	0.0306212	0.170504	0.0100418	0.0885612	-0.159031	0.319419	0.845772	0.150045	0.605662	0.687806
Rho GAPs	GAPs	Rho	ENSG00000175220	ARHGAP1	Rho GTPase activating protein 1 [Source:HGNC Symbol;Acc:HGNC:673]	392	0.117031	0.330841	0.268004	-0.071949	0.238854	0.349804	0.284692	0.0169255	0.0791546	0.149891	0.0202329	0.117931	0.050991	0.746232	0.894088	0.29274	0.304924	0.566832
Rab GTPase	GTPase	Rab	ENSG00000139998	RAB15	RAB15, member RAS oncogene family [Source:HGNC Symbol;Acc:HGNC:20150]	376267	0.118194	0.33152	0.268403	0.0262585	0.815591	0.574668	0.343063	0.00415801	0.0382656	0.167982	0.00981331	0.0879354	0.0628233	0.687833	0.888507	0.00100532	0.997176	0.780627
Rho GEFs	GEFs	Rho	ENSG00000240771	ARHGEF25	Rho guanine nucleotide exchange factor 25 [Source:HGNC Symbol;Acc:HGNC:30275]	115557	-0.117257	0.335746	0.270064	-0.115167	0.370217	0.41542	-0.235735	0.0519756	0.143033	-0.101435	0.123729	0.263796	0.250919	0.112722	0.797116	-0.0888007	0.758844	0.732609
Ras GEFs	GEFs	Ras	ENSG00000117000	RLF	RLF zinc finger [Source:HGNC Symbol;Acc:HGNC:10025]	6018	0.11873	0.3359	0.270126	0.206573	0.160164	0.307817	-0.243536	0.0473683	0.136179	-0.141649	0.0327202	0.14799	0.05047	0.751188	0.895171	-0.318233	0.269351	0.547116
Rho GEFs	GEFs	Rho	ENSG00000129675	ARHGEF6	Rac/Cdc42 guanine nucleotide exchange factor 6 [Source:HGNC Symbol;Acc:HGNC:685]	9459	0.116324	0.336298	0.270333	0.0412871	0.620845	0.512202	-0.0295151	0.808465	0.557595	-0.00901932	0.891117	0.609637	-0.17399	0.269722	0.842326	0.054338	0.849945	0.752796
Ras GEFs	GEFs	Ras	ENSG00000136237	RAPGEF5	Rap guanine nucleotide exchange factor 5 [Source:HGNC Symbol;Acc:HGNC:16862]	9771	0.113639	0.348462	0.275566	0.22605	0.224535	0.341939	-0.125302	0.302878	0.34623	-0.0824879	0.209338	0.32482	0.220983	0.162172	0.814915	0.411554	0.151552	0.472051
Rho GEFs	GEFs	Rho	ENSG00000165801	ARHGEF40	Rho guanine nucleotide exchange factor 40 [Source:HGNC Symbol;Acc:HGNC:25516]	55701	0.112454	0.355021	0.27862	0.0524775	0.625395	0.513194	-0.00213748	0.986063	0.607144	-0.0354907	0.591613	0.51464	-0.0816408	0.608648	0.884762	-0.395715	0.169733	0.484827
Ras GAPs	GAPs	Ras	ENSG00000140575	IQGAP1	IQ motif containing GTPase activating protein 1 [Source:HGNC Symbol;Acc:HGNC:6110]	8826	0.108114	0.36954	0.284339	0.122328	0.338652	0.400911	-0.162751	0.177205	0.266234	-0.0579944	0.375569	0.423318	0.155841	0.312572	0.845772	0.3599	0.198204	0.501616
Rho GTPase	GTPase	Rho	ENSG00000155366	RHOC	ras homolog family member C [Source:HGNC Symbol;Acc:HGNC:669]	389	0.106844	0.372042	0.285521	0.0799189	0.215735	0.338563	0.250428	0.0352281	0.115773	0.0969637	0.134254	0.27317	-0.0750442	0.63327	0.885285	0.02413	0.932709	0.769741
Rho GEFs	GEFs	Rho	ENSG00000107554	DNMBP	dynamin binding protein [Source:HGNC Symbol;Acc:HGNC:30373]	23268	-0.104257	0.376495	0.287144	-0.200989	0.0256898	0.188902	0.220529	0.0603897	0.15514	0.119433	0.060143	0.19136	-0.0539995	0.735129	0.892666	0.336876	0.243426	0.53454
Rab GTPase	GTPase	Rab	ENSG00000139832	RAB20	RAB20, member RAS oncogene family [Source:HGNC Symbol;Acc:HGNC:18260]	55647	0.104168	0.38418	0.290526	0.0395336	0.665322	0.525837	0.120875	0.314145	0.352333	0.0573101	0.378078	0.425072	0.0415695	0.794428	0.903018	0.422769	0.142071	0.461464
Arf GTPase	GTPase	Arf	ENSG00000165997	ARL5B	ADP ribosylation factor like GTPase 5B [Source:HGNC Symbol;Acc:HGNC:23052]	221079	0.106499	0.38473	0.290765	0.196332	0.10079	0.266539	-0.136133	0.267773	0.327256	-0.107126	0.105624	0.245818	0.0126216	0.93662	0.914586	0.108922	0.705377	0.716916
Rab GTPase	GTPase	Rab	ENSG00000080371	RAB21	RAB21, member RAS oncogene family [Source:HGNC Symbol;Acc:HGNC:18263]	23011	0.106364	0.390529	0.293378	0.0729907	0.489685	0.463688	-0.163569	0.187154	0.273238	-0.0864184	0.197849	0.319021	0.0890556	0.580245	0.880271	-0.356365	0.221374	0.519564
Rab GTPase	GTPase	Rab	ENSG00000172780	RAB43	RAB43, member RAS oncogene family [Source:HGNC Symbol;Acc:HGNC:19983]	339122	0.105451	0.394604	0.295421	0.0374916	0.80566	0.572096	0.29232	0.0171269	0.0795688	0.14511	0.0291458	0.138954	-0.0279744	0.860331	0.909293	0.0495954	0.8636	0.75582
Rab GAPs	GAPs	Rab	ENSG00000065882	TBC1D1	TBC1 domain family member 1 [Source:HGNC Symbol;Acc:HGNC:11578]	23216	0.0992395	0.409284	0.301261	-0.0112395	0.908044	0.600732	0.00731353	0.951794	0.599728	0.00814045	0.901022	0.611594	-0.00882254	0.954769	0.915875	-0.107011	0.704671	0.716916
Rho GEFs	GEFs	Rho	ENSG00000205726	ITSN1	intersectin 1 [Source:HGNC Symbol;Acc:HGNC:6183]	6453	0.0998417	0.409844	0.301349	-0.0286134	0.680821	0.531325	0.309434	0.00964987	0.0590923	0.137011	0.0353391	0.152078	-0.133719	0.392219	0.854871	-0.386254	0.172105	0.485836
Arf GTPase	GTPase	Arf	ENSG00000169379	ARL13B	ADP ribosylation factor like GTPase 13B [Source:HGNC Symbol;Acc:HGNC:25419]	200894	0.100358	0.418871	0.304681	0.100143	0.297003	0.379618	-0.11576	0.35271	0.374483	-0.0622427	0.355738	0.412871	0.0670601	0.648023	0.885285	0.123565	0.643183	0.699565
Rab GTPase	GTPase	Rab	ENSG00000185236	RAB11B	RAB11B, member RAS oncogene family [Source:HGNC Symbol;Acc:HGNC:9761]	9230	-0.0980416	0.424398	0.306896	-0.0569441	0.298551	0.380548	-0.230463	0.0592967	0.153723	-0.140726	0.0328027	0.148028	-0.104655	0.509437	0.8698	-0.124833	0.664971	0.704816
Rho GEFs	GEFs	Rho	ENSG00000120278	PLEKHG1	pleckstrin homology and RhoGEF domain containing G1 [Source:HGNC Symbol;Acc:HGNC:20884]	57480	0.0946574	0.44053	0.314016	0.143162	0.328238	0.396094	-0.126758	0.302926	0.34623	-0.0755753	0.255983	0.355925	0.07703	0.627232	0.885285	0.320951	0.263757	0.544744
Ras GAPs	GAPs	Ras	ENSG00000076864	RAP1GAP	RAP1 GTPase activating protein [Source:HGNC Symbol;Acc:HGNC:9858]	5909	0.0948748	0.445122	0.315507	-0.113677	0.579628	0.497974	0.422557	0.000463444	0.0138226	0.194781	0.00314395	0.0517555	-0.0643571	0.668868	0.887384	-0.299576	0.271483	0.547643
Rho GEFs	GEFs	Rho	ENSG00000090924	PLEKHG2	pleckstrin homology and RhoGEF domain containing G2 [Source:HGNC Symbol;Acc:HGNC:29515]	64857	0.0887427	0.452477	0.318003	0.218757	0.0586437	0.233581	-0.105218	0.374625	0.386842	-0.0814939	0.202676	0.321082	-0.0902733	0.576123	0.879234	-0.752626	0.00892543	0.231824
Arf GTPase	GTPase	Arf	ENSG00000165527	ARF6	ADP ribosylation factor 6 [Source:HGNC Symbol;Acc:HGNC:659]	382	0.0907599	0.454097	0.318925	0.0524183	0.365537	0.412816	-0.232986	0.0534184	0.14495	-0.059519	0.365766	0.417866	0.0214172	0.89436	0.912618	-0.10768	0.713023	0.719819
Rab GTPase	GTPase	Rab	ENSG00000141542	RAB40B	RAB40B, member RAS oncogene family [Source:HGNC Symbol;Acc:HGNC:18284]	10966	-0.0903613	0.45984	0.321119	-0.215078	0.130321	0.285954	-0.0492309	0.68867	0.516077	0.0185014	0.780841	0.577297	0.0725977	0.648531	0.885285	-0.0197833	0.945496	0.771535
Rab GTPase	GTPase	Rab	ENSG00000099246	RAB18	RAB18, member RAS oncogene family [Source:HGNC Symbol;Acc:HGNC:14244]	22931	0.0847531	0.473865	0.32648	0.0158707	0.808242	0.573124	0.170431	0.149591	0.244785	0.076321	0.233892	0.34062	0.0636548	0.690038	0.888507	-0.347875	0.228314	0.524395
Rab GAPs	GAPs	Rab	ENSG00000100359	SGSM3	small G protein signaling modulator 3 [Source:HGNC Symbol;Acc:HGNC:25228]	27352	0.0873644	0.482594	0.330222	-0.0748472	0.446747	0.446309	0.236278	0.0563231	0.149502	0.120562	0.0722145	0.207141	-0.0364305	0.81234	0.905208	-0.113464	0.683759	0.711364
Arf GAPs	GAPs	Arf	ENSG00000105963	ADAP1	ArfGAP with dual PH domains 1 [Source:HGNC Symbol;Acc:HGNC:16486]	11033	0.0853043	0.486131	0.331502	0.133272	0.223941	0.341681	-0.112746	0.358699	0.377923	-0.044184	0.50667	0.481248	0.0829279	0.603435	0.883543	0.466189	0.105435	0.425477
Rho GEFs	GEFs	Rho	ENSG00000116641	DOCK7	dedicator of cytokinesis 7 [Source:HGNC Symbol;Acc:HGNC:19190]	85440	0.0851837	0.489358	0.332812	0.32947	0.00828749	0.154326	0.118866	0.335987	0.365268	0.0134191	0.841292	0.594781	0.00379958	0.980894	0.917526	-0.036065	0.900375	0.762498
Rho GAPs	GAPs	Rho	ENSG00000165322	ARHGAP12	Rho GTPase activating protein 12 [Source:HGNC Symbol;Acc:HGNC:16348]	94134	0.0833541	0.49485	0.335499	-0.00965572	0.8903	0.596582	0.202167	0.0969316	0.196598	0.102159	0.121456	0.261496	0.0173903	0.910485	0.914586	-0.183476	0.5131	0.657516
Arf GAPs	GAPs	Arf	ENSG00000108262	GIT1	GIT ArfGAP 1 [Source:HGNC Symbol;Acc:HGNC:4272]	28964	0.0839017	0.498484	0.336385	0.0761223	0.406506	0.430134	-0.135403	0.275561	0.331282	-0.0349053	0.604367	0.519523	-0.130819	0.407998	0.858212	0.128685	0.654426	0.701566
Rab GTPase	GTPase	Rab	ENSG00000144840	RABL3	RAB, member of RAS oncogene family like 3 [Source:HGNC Symbol;Acc:HGNC:18072]	285282	0.078654	0.509124	0.340274	0.0377407	0.595163	0.503745	0.211209	0.0751292	0.172428	0.0540129	0.403571	0.437246	-0.0634723	0.68895	0.888507	0.0921316	0.749026	0.728813
Rho GAPs	GAPs	Rho	ENSG00000130052	STARD8	StAR related lipid transfer domain containing 8 [Source:HGNC Symbol;Acc:HGNC:19161]	9754	0.0805421	0.510747	0.340845	0.0771015	0.310669	0.386908	-0.0608439	0.620875	0.493024	-0.00989499	0.881891	0.607152	0.101199	0.522199	0.8698	0.443515	0.120315	0.439313
Rho GEFs	GEFs	Rho	ENSG00000152767	FARP1	FERM, ARH/RhoGEF and pleckstrin domain protein 1 [Source:HGNC Symbol;Acc:HGNC:3591]	10160	0.078769	0.524881	0.345875	-0.124062	0.146691	0.298131	0.462272	0.000107527	0.00780714	0.239532	0.000219731	0.0204913	0.125798	0.43216	0.859198	-0.0537742	0.853535	0.75296
Rab GTPase	GTPase	Rab	ENSG00000137502	RAB30	RAB30, member RAS oncogene family [Source:HGNC Symbol;Acc:HGNC:9770]	27314	-0.0789168	0.525339	0.346053	0.151335	0.263031	0.363311	-0.229214	0.0638177	0.159704	-0.0771205	0.251954	0.353221	0.0203434	0.89801	0.913041	0.123616	0.667822	0.705718
Rho GTPase	GTPase	Rho	ENSG00000072422	RHOBTB1	Rho related BTB domain containing 1 [Source:HGNC Symbol;Acc:HGNC:18738]	9886	-0.076366	0.529828	0.347698	-0.0423282	0.615555	0.510524	0.0283868	0.81623	0.560209	0.0566421	0.390493	0.430931	-0.0984962	0.541799	0.872033	-0.0216783	0.941112	0.771535
Rab GTPase	GTPase	Rab	ENSG00000119396	RAB14	RAB14, member RAS oncogene family [Source:HGNC Symbol;Acc:HGNC:16524]	51552	0.0755538	0.539183	0.35084	-0.0458011	0.15198	0.302098	0.153348	0.212918	0.290961	0.114772	0.0836164	0.222495	0.114789	0.47445	0.866829	0.346734	0.232893	0.526927
Arf GAPs	GAPs	Arf	ENSG00000149182	ARFGAP2	ADP ribosylation factor GTPase activating protein 2 [Source:HGNC Symbol;Acc:HGNC:13504]	84364	0.0754005	0.540714	0.3514	-0.0256666	0.789094	0.567393	0.166288	0.177216	0.266234	0.045356	0.498028	0.477795	0.0554448	0.73031	0.892162	0.352869	0.225176	0.521849
Rho GEFs	GEFs	Rho	ENSG00000186716	BCR	BCR activator of RhoGEF and GTPase [Source:HGNC Symbol;Acc:HGNC:1014]	613	-0.0740123	0.542826	0.351979	-0.150545	0.0973944	0.262963	0.146193	0.229759	0.303455	0.0670543	0.309196	0.385901	0.106499	0.503126	0.8698	-0.0520469	0.857155	0.753895
Rho GEFs	GEFs	Rho	ENSG00000171680	PLEKHG5	pleckstrin homology and RhoGEF domain containing G5 [Source:HGNC Symbol;Acc:HGNC:29105]	57449	0.0740269	0.551632	0.355289	0.0388528	0.718585	0.544005	-0.0679395	0.586356	0.480859	-0.0593741	0.378819	0.425072	-0.060866	0.706356	0.891012	0.165864	0.571596	0.675282
Rho GAPs	GAPs	Rho	ENSG00000160007	ARHGAP35	Rho GTPase activating protein 35 [Source:HGNC Symbol;Acc:HGNC:4591]	2909	-0.0710723	0.556677	0.357214	-0.138188	0.0840261	0.251558	0.134469	0.266769	0.32688	0.0427783	0.514754	0.48486	-0.17789	0.263007	0.841179	-0.214938	0.457289	0.635341
Ras GTPase	GTPase	Ras	ENSG00000197885	NKIRAS1	NFKB inhibitor interacting Ras like 1 [Source:HGNC Symbol;Acc:HGNC:17899]	28512	-0.0695442	0.566555	0.360441	0.0356805	0.658705	0.523593	-0.0597991	0.623595	0.493929	-0.0298056	0.651237	0.536359	0.127511	0.418774	0.858352	0.129421	0.651722	0.700463
Ras GAPs	GAPs	Ras	ENSG00000197283	SYNGAP1	synaptic Ras GTPase activating protein 1 [Source:HGNC Symbol;Acc:HGNC:11497]	8831	0.0693305	0.570212	0.361627	0.0969803	0.403772	0.429328	-0.202032	0.0970396	0.196634	-0.0963375	0.144335	0.281872	-0.0128321	0.936711	0.914586	-0.786198	0.00620509	0.217894
Rho GTPase	GTPase	Rho	ENSG00000008853	RHOBTB2	Rho related BTB domain containing 2 [Source:HGNC Symbol;Acc:HGNC:18756]	23221	-0.0683294	0.570541	0.361627	-0.0031209	0.954223	0.61244	0.0559791	0.643538	0.500352	0.0206768	0.752149	0.568979	-0.0708079	0.653522	0.885951	-0.462474	0.103978	0.424349
Arf GTPase	GTPase	Arf	ENSG00000004059	ARF5	ADP ribosylation factor 5 [Source:HGNC Symbol;Acc:HGNC:658]	381	-0.0693818	0.577147	0.364031	-0.0627915	0.178372	0.318706	0.173199	0.163671	0.2547	0.0964884	0.151404	0.286651	-0.163227	0.308912	0.845772	0.0310434	0.915375	0.766054
Rab GAPs	GAPs	Rab	ENSG00000204634	TBC1D8	TBC1 domain family member 8 [Source:HGNC Symbol;Acc:HGNC:17791]	11138	-0.0690827	0.578935	0.364652	-0.0786813	0.384708	0.421909	-0.0591645	0.636008	0.498	0.0020348	0.976015	0.631401	-0.236291	0.127591	0.798406	-0.111612	0.693646	0.714502
Rab GTPase	GTPase	Rab	ENSG00000172794	RAB37	RAB37, member RAS oncogene family [Source:HGNC Symbol;Acc:HGNC:30268]	326624	-0.067798	0.583012	0.366409	-0.0416143	0.693377	0.53556	-0.0336113	0.786452	0.550226	0.0152763	0.819986	0.588601	-0.0148661	0.926421	0.914586	-0.0574402	0.8442	0.752594
Rab GTPase	GTPase	Rab	ENSG00000174903	RAB1B	RAB1B, member RAS oncogene family [Source:HGNC Symbol;Acc:HGNC:18370]	81876	0.062505	0.597749	0.371695	-0.0519172	0.338703	0.400911	0.182498	0.122647	0.221993	0.074876	0.243121	0.346382	0.0137972	0.932287	0.914586	-0.771452	0.00758848	0.222568
Ras GTPase	GTPase	Ras	ENSG00000164949	GEM	GTP binding protein overexpressed in skeletal muscle [Source:HGNC Symbol;Acc:HGNC:4234]	2669	0.0641435	0.601865	0.373301	0.342717	0.176743	0.317885	-0.28634	0.0185279	0.0825148	-0.140331	0.0334319	0.14885	0.0107858	0.945926	0.914709	0.123005	0.669969	0.706246
Rho GAPs	GAPs	Rho	ENSG00000133121	STARD13	StAR related lipid transfer domain containing 13 [Source:HGNC Symbol;Acc:HGNC:19164]	90627	0.0618521	0.615289	0.377669	0.177589	0.306006	0.384687	-0.211957	0.0838468	0.18088	-0.13228	0.0455209	0.169562	0.143598	0.340453	0.846995	0.122267	0.65553	0.70193
Rab GTPase	GTPase	Rab	ENSG00000105649	RAB3A	RAB3A, member RAS oncogene family [Source:HGNC Symbol;Acc:HGNC:9777]	5864	-0.0590247	0.618063	0.378449	-0.117679	0.172217	0.314375	-0.19952	0.0907739	0.189208	-0.107684	0.0915937	0.230595	0.0946961	0.555422	0.874693	0.648035	0.0243014	0.286103
Rho GEFs	GEFs	Rho	ENSG00000074964	ARHGEF10L	Rho guanine nucleotide exchange factor 10 like [Source:HGNC Symbol;Acc:HGNC:25540]	55160	0.0608483	0.622998	0.380334	-0.115931	0.407921	0.430549	0.292809	0.0166919	0.0784706	0.133896	0.0440903	0.167289	0.164125	0.287467	0.845772	0.271074	0.333555	0.580427
Rab GTPase	GTPase	Rab	ENSG00000196642	RABL6	RAB, member RAS oncogene family like 6 [Source:HGNC Symbol;Acc:HGNC:24703]	55684	0.0590464	0.627968	0.382033	0.0496612	0.444596	0.44518	0.0465315	0.703736	0.520964	0.0123593	0.851956	0.597472	-0.0843688	0.596887	0.881325	0.379793	0.187971	0.49438
Rab GTPase	GTPase	Rab	ENSG00000144566	RAB5A	RAB5A, member RAS oncogene family [Source:HGNC Symbol;Acc:HGNC:9783]	5868	0.0595535	0.629403	0.382334	0.120232	0.190434	0.325269	-0.299275	0.0140626	0.0722419	-0.132717	0.0453732	0.169412	0.0937638	0.552812	0.874639	0.0128912	0.96419	0.774538
Ras GTPase	GTPase	Ras	ENSG00000126458	RRAS	RAS related [Source:HGNC Symbol;Acc:HGNC:10447]	6237	0.0583791	0.632509	0.38358	0.0331321	0.740201	0.551041	-0.00740941	0.951825	0.599728	0.00869596	0.895733	0.610984	0.259461	0.106717	0.797116	0.27066	0.356473	0.590927
Ras GTPase	GTPase	Ras	ENSG00000106615	RHEB	Ras homolog, mTORC1 binding [Source:HGNC Symbol;Acc:HGNC:10011]	6009	-0.0544451	0.647391	0.388273	-0.0545266	0.468553	0.456498	-0.0861907	0.470367	0.433518	-0.0232896	0.718765	0.557362	-0.0636115	0.691417	0.888507	-0.163952	0.572977	0.676057
Rho GEFs	GEFs	Rho	ENSG00000008323	PLEKHG6	pleckstrin homology and RhoGEF domain containing G6 [Source:HGNC Symbol;Acc:HGNC:25562]	55200	0.055523	0.649396	0.388956	0.0993427	0.413747	0.4328	-0.159861	0.19041	0.275054	-0.039894	0.547446	0.497848	0.0190052	0.905425	0.914036	-0.227257	0.433187	0.628741
Rab GAPs	GAPs	Rab	ENSG00000095383	TBC1D2	TBC1 domain family member 2 [Source:HGNC Symbol;Acc:HGNC:18026]	55357	0.0512979	0.660571	0.393067	-0.0551787	0.644682	0.519658	0.0548316	0.640095	0.499295	0.090728	0.150587	0.286027	0.0183375	0.903624	0.913652	0.082466	0.764217	0.734028
Rho GTPase	GTPase	Rho	ENSG00000126785	RHOJ	ras homolog family member J [Source:HGNC Symbol;Acc:HGNC:688]	57381	0.0518917	0.670973	0.39627	0.0792695	0.473921	0.458069	-0.036849	0.76387	0.542206	-0.0433848	0.512908	0.484376	0.0655291	0.682714	0.887384	0.438526	0.129606	0.449845
Rho GEFs	GEFs	Rho	ENSG00000003393	ALS2	alsin Rho guanine nucleotide exchange factor ALS2 [Source:HGNC Symbol;Acc:HGNC:443]	57679	0.0509904	0.673451	0.397244	-0.0416384	0.515959	0.474708	0.141355	0.242967	0.312368	0.0666253	0.309548	0.385901	-0.00302714	0.98497	0.917537	0.240633	0.408622	0.615612
Rho GAPs	GAPs	Rho	ENSG00000164741	DLC1	DLC1 Rho GTPase activating protein [Source:HGNC Symbol;Acc:HGNC:2897]	10395	0.0501831	0.675085	0.397646	0.0424305	0.764279	0.558825	-0.0430224	0.720414	0.527541	-0.0349319	0.591034	0.514558	0.0883511	0.548065	0.873627	0.212214	0.426515	0.625927
Ras GTPase	GTPase	Ras	ENSG00000174775	HRAS	HRas proto-oncogene, GTPase [Source:HGNC Symbol;Acc:HGNC:5173]	3265	0.0501391	0.683574	0.400021	-0.12486	0.272009	0.36787	0.144969	0.238813	0.309641	0.0957246	0.149756	0.285407	0.058694	0.707625	0.891728	-0.167171	0.556112	0.669899
Rab GTPase	GTPase	Rab	ENSG00000075785	RAB7A	RAB7A, member RAS oncogene family [Source:HGNC Symbol;Acc:HGNC:9788]	7879	0.048561	0.688293	0.401803	0.0246552	0.666948	0.526608	-0.125275	0.301354	0.345311	-0.0359916	0.583969	0.512403	0.0595495	0.712317	0.892162	-0.486597	0.0945194	0.4136
Arf GTPase	GTPase	Arf	ENSG00000162980	ARL5A	ADP ribosylation factor like GTPase 5A [Source:HGNC Symbol;Acc:HGNC:696]	26225	-0.0466411	0.702553	0.406217	-0.0167932	0.830187	0.578811	-0.0943911	0.440836	0.418982	0.000923386	0.9889	0.633646	-0.000581778	0.997051	0.919059	0.514901	0.0689608	0.380413
Rho GEFs	GEFs	Rho	ENSG00000126822	PLEKHG3	pleckstrin homology and RhoGEF domain containing G3 [Source:HGNC Symbol;Acc:HGNC:20364]	26030	0.0444646	0.718038	0.41122	0.00978038	0.932616	0.606244	0.0833789	0.499637	0.444882	0.0166886	0.803018	0.583788	-0.0364775	0.815788	0.905208	-0.215306	0.44821	0.633252
Rab GTPase	GTPase	Rab	ENSG00000128581	IFT22	intraflagellar transport 22 [Source:HGNC Symbol;Acc:HGNC:21895]	64792	0.0443952	0.718205	0.41122	-0.00147393	0.987469	0.619567	0.0193842	0.875328	0.578562	-0.00892929	0.89374	0.610602	0.0519442	0.735181	0.892666	0.0313166	0.910608	0.765205
Rho GAPs	GAPs	Rho	ENSG00000075884	ARHGAP15	Rho GTPase activating protein 15 [Source:HGNC Symbol;Acc:HGNC:21030]	55843	0.0420551	0.724607	0.41345	0.101788	0.565557	0.49259	-0.137914	0.248177	0.31521	-0.0868159	0.17851	0.304932	-0.13193	0.4091	0.858212	0.0462802	0.873531	0.757171
Ras GTPase	GTPase	Ras	ENSG00000108551	RASD1	ras related dexamethasone induced 1 [Source:HGNC Symbol;Acc:HGNC:15828]	51655	-0.0415044	0.73789	0.417637	-0.229515	0.292398	0.376938	0.321337	0.00850912	0.0556759	0.170975	0.0097172	0.0879249	0.0247422	0.873162	0.910198	-0.396727	0.156268	0.475696
Arf GAPs	GAPs	Arf	ENSG00000088280	ASAP3	ArfGAP with SH3 domain, ankyrin repeat and PH domain 3 [Source:HGNC Symbol;Acc:HGNC:14987]	55616	0.0398519	0.745288	0.420117	-0.169808	0.318887	0.391063	0.385463	0.00127205	0.0218364	0.181349	0.00541862	0.0661799	-0.0119462	0.938816	0.914586	0.319493	0.256507	0.541445
Arf GAPs	GAPs	Arf	ENSG00000204172	AGAP9	ArfGAP with GTPase domain, ankyrin repeat and PH domain 9 [Source:HGNC Symbol;Acc:HGNC:23463]	642517	0.0386096	0.751255	0.421784	-0.129937	0.363707	0.41189	0.142313	0.242804	0.312265	0.0629154	0.340531	0.405132	-0.090185	0.562851	0.875993	-0.232402	0.411105	0.617221
Rho GAPs	GAPs	Rho	ENSG00000147799	ARHGAP39	Rho GTPase activating protein 39 [Source:HGNC Symbol;Acc:HGNC:29351]	80728	0.039238	0.752198	0.421911	0.108331	0.149542	0.300496	-0.185969	0.133675	0.23131	-0.0846573	0.20787	0.323926	0.134073	0.385578	0.854871	-0.190689	0.497105	0.652447
Rho GEFs	GEFs	Rho	ENSG00000214944	ARHGEF28	Rho guanine nucleotide exchange factor 28 [Source:HGNC Symbol;Acc:HGNC:30322]	64283	-0.0350961	0.753213	0.42222	0.0363769	0.702503	0.538728	-0.0741727	0.507648	0.448333	-0.00178664	0.9765	0.631401	0.247109	0.125516	0.798269	0.0869167	0.768104	0.73507
Rab GTPase	GTPase	Rab	ENSG00000100360	IFT27	intraflagellar transport 27 [Source:HGNC Symbol;Acc:HGNC:18626]	11020	0.038447	0.755462	0.422683	0.0126088	0.878445	0.593519	0.0312884	0.800704	0.55544	0.00719459	0.914578	0.615304	0.136555	0.396809	0.856092	0.273276	0.350166	0.586788
Rho GAPs	GAPs	Rho	ENSG00000159314	ARHGAP27	Rho GTPase activating protein 27 [Source:HGNC Symbol;Acc:HGNC:31813]	201176	0.0343549	0.766775	0.426152	0.136825	0.0800103	0.24724	0.00765276	0.947543	0.598659	-0.00203262	0.974235	0.631215	0.0195114	0.902889	0.913491	-0.463419	0.107902	0.428016
Rab GTPase	GTPase	Rab	ENSG00000105514	RAB3D	RAB3D, member RAS oncogene family [Source:HGNC Symbol;Acc:HGNC:9779]	9545	-0.0315956	0.78957	0.432757	-0.0789567	0.192771	0.326898	0.00608438	0.959183	0.601519	0.0465983	0.468132	0.466005	0.0273176	0.862714	0.90951	0.0334021	0.907307	0.764841
Arf GAPs	GAPs	Arf	ENSG00000047365	ARAP2	ArfGAP with RhoGAP domain, ankyrin repeat and PH domain 2 [Source:HGNC Symbol;Acc:HGNC:16924]	116984	0.031549	0.793105	0.433931	0.138624	0.137828	0.292689	-0.127404	0.289974	0.339082	-0.0873386	0.179165	0.305242	0.110554	0.489021	0.869318	0.367665	0.203631	0.505768
Arf GTPase	GTPase	Arf	ENSG00000185305	ARL15	ADP ribosylation factor like GTPase 15 [Source:HGNC Symbol;Acc:HGNC:25945]	54622	0.0317949	0.796612	0.434812	-0.00522168	0.932199	0.606244	0.0798856	0.518494	0.452909	0.0244298	0.715383	0.556569	0.0397963	0.80172	0.904597	0.146248	0.611091	0.689516
Rho GEFs	GEFs	Rho	ENSG00000178038	ALS2CL	ALS2 C-terminal like [Source:HGNC Symbol;Acc:HGNC:20605]	259173	0.0304662	0.801697	0.436512	-0.0554081	0.661449	0.524804	0.157487	0.193882	0.277891	0.0144856	0.826007	0.590202	-0.0769338	0.630839	0.885285	0.0696332	0.810785	0.744161
Ran GTPase	GTPase	Ran	ENSG00000132341	RAN	RAN, member RAS oncogene family [Source:HGNC Symbol;Acc:HGNC:9846]	5901	0.0288068	0.809554	0.438599	0.0588343	0.531067	0.48053	-0.0730905	0.542107	0.461745	-0.0438323	0.499128	0.47803	0.0484909	0.764367	0.898068	0.206202	0.482189	0.644992
Arf GTPase	GTPase	Arf	ENSG00000213465	ARL2	ADP ribosylation factor like GTPase 2 [Source:HGNC Symbol;Acc:HGNC:693]	402	0.0292028	0.814207	0.439701	-0.0351686	0.690495	0.534733	-0.0788142	0.527144	0.456355	-0.0119155	0.859892	0.60006	-0.0235405	0.882145	0.911289	-0.195181	0.497909	0.652647
Arf GAPs	GAPs	Arf	ENSG00000184060	ADAP2	ArfGAP with dual PH domains 2 [Source:HGNC Symbol;Acc:HGNC:16487]	55803	0.0254689	0.831007	0.444489	-0.041969	0.823174	0.576741	0.141328	0.236352	0.308051	0.0892714	0.166218	0.297884	0.0627611	0.693665	0.889064	0.353421	0.220109	0.518823
Rho GTPase	GTPase	Rho	ENSG00000173156	RHOD	ras homolog family member D [Source:HGNC Symbol;Acc:HGNC:670]	29984	0.0254641	0.836119	0.446023	-0.105738	0.710008	0.540739	0.353376	0.00339488	0.0352636	0.153752	0.0195407	0.116599	-0.12304	0.447299	0.862184	-0.275648	0.34804	0.585666
Rab GTPase	GTPase	Rab	ENSG00000172007	RAB33B	RAB33B, member RAS oncogene family [Source:HGNC Symbol;Acc:HGNC:16075]	83452	-0.0245212	0.83983	0.44712	-0.0762409	0.34367	0.402823	-0.162041	0.181225	0.269365	-0.0671588	0.306794	0.384704	0.0422015	0.78671	0.902219	-0.0585025	0.836355	0.750256
Rho GAPs	GAPs	Rho	ENSG00000134909	ARHGAP32	Rho GTPase activating protein 32 [Source:HGNC Symbol;Acc:HGNC:17399]	9743	0.0245235	0.840151	0.447139	0.0282085	0.602563	0.506826	-0.179226	0.139593	0.236532	-0.0852135	0.194868	0.316446	-0.00307985	0.984715	0.917537	-0.157945	0.588155	0.681191
Ras GTPase	GTPase	Ras	ENSG00000116473	RAP1A	RAP1A, member of RAS oncogene family [Source:HGNC Symbol;Acc:HGNC:9855]	5906	0.0204675	0.865846	0.454491	0.016622	0.74851	0.553462	-0.0662331	0.585786	0.48057	0.00740497	0.910416	0.614238	0.177146	0.273266	0.842326	-0.0751794	0.798546	0.742777
Rho GEFs	GEFs	Rho	ENSG00000110237	ARHGEF17	Rho guanine nucleotide exchange factor 17 [Source:HGNC Symbol;Acc:HGNC:21726]	9828	-0.0198185	0.866525	0.454541	0.0207542	0.850205	0.585773	-0.0957863	0.417596	0.409256	-0.0523544	0.412849	0.441215	-0.0351535	0.826862	0.905208	-0.145198	0.61861	0.69276
Arf GTPase	GTPase	Arf	ENSG00000214087	ARL16	ADP ribosylation factor like GTPase 16 [Source:HGNC Symbol;Acc:HGNC:27902]	339231	0.0195963	0.874782	0.456616	0.0803217	0.351288	0.405658	-0.0146435	0.906629	0.588468	-0.00734391	0.913426	0.615013	0.0370206	0.810561	0.905137	0.175731	0.530512	0.662262
Rho GAPs	GAPs	Rho	ENSG00000275832	ARHGAP23	Rho GTPase activating protein 23 [Source:HGNC Symbol;Acc:HGNC:29293]	57636	-0.0186521	0.87999	0.457967	-0.0812944	0.551366	0.488245	-0.184295	0.134822	0.232231	-0.0822527	0.218341	0.331374	-0.0525766	0.74546	0.894088	0.0610438	0.835591	0.750083
Rab GTPase	GTPase	Rab	ENSG00000197562	RAB40C	RAB40C, member RAS oncogene family [Source:HGNC Symbol;Acc:HGNC:18285]	57799	-0.0136776	0.912454	0.46702	-0.0667805	0.388491	0.423918	0.00903802	0.942313	0.597438	0.0382674	0.570862	0.507617	-0.0558187	0.729144	0.892162	-0.143421	0.624036	0.694102
Arf GTPase	GTPase	Arf	ENSG00000079332	SAR1A	secretion associated Ras related GTPase 1A [Source:HGNC Symbol;Acc:HGNC:10534]	56681	0.0126713	0.916748	0.468344	-0.00389002	0.947402	0.610564	-0.0691389	0.569611	0.473644	-0.0135039	0.837494	0.593423	-0.0698682	0.658449	0.887371	-0.566948	0.0458336	0.344307
Arf GAPs	GAPs	Arf	ENSG00000131584	ACAP3	ArfGAP with coiled-coil, ankyrin repeat and PH domains 3 [Source:HGNC Symbol;Acc:HGNC:16754]	116983	0.0117703	0.92337	0.470314	-0.0115029	0.912751	0.601912	0.0720086	0.557392	0.468601	0.0236868	0.721481	0.558483	-0.0801713	0.611576	0.885209	-0.0981869	0.732067	0.724766
Arf GAPs	GAPs	Arf	ENSG00000084070	SMAP2	small ArfGAP2 [Source:HGNC Symbol;Acc:HGNC:25082]	64744	0.00832903	0.944947	0.476169	-0.0229108	0.724018	0.545806	0.158472	0.188457	0.273968	0.111988	0.0847455	0.224048	0.0722537	0.65386	0.885951	0.332039	0.254961	0.540816
Rho GAPs	GAPs	Rho	ENSG00000138639	ARHGAP24	Rho GTPase activating protein 24 [Source:HGNC Symbol;Acc:HGNC:25361]	83478	0.00707803	0.95448	0.47792	-0.0190611	0.90428	0.599508	-0.142661	0.250016	0.316339	-0.0769801	0.251306	0.352809	0.00116041	0.993936	0.918156	-0.0434113	0.875561	0.757349
Rho GEFs	GEFs	Rho	ENSG00000006607	FARP2	FERM, ARH/RhoGEF and pleckstrin domain protein 2 [Source:HGNC Symbol;Acc:HGNC:16460]	9855	0.00398956	0.97359	0.482872	-0.00550552	0.94168	0.609135	0.160421	0.18262	0.27061	0.0291059	0.656395	0.538098	-0.182598	0.251855	0.841179	-0.0270851	0.9257	0.767672
Rho GEFs	GEFs	Rho	ENSG00000198844	ARHGEF15	Rho guanine nucleotide exchange factor 15 [Source:HGNC Symbol;Acc:HGNC:15590]	22899	-0.00404187	0.973569	0.482872	0.0684853	0.556671	0.489502	-0.077095	0.528555	0.45672	-0.00359977	0.956676	0.627605	0.0244713	0.879004	0.911161	0.0174994	0.952197	0.772446
Arf GAPs	GAPs	Arf	ENSG00000188234	AGAP4	ArfGAP with GTPase domain, ankyrin repeat and PH domain 4 [Source:HGNC Symbol;Acc:HGNC:23459]	119016	-0.00170558	0.988867	0.486595	-0.0886982	0.512898	0.473172	0.113887	0.352167	0.374188	0.10469	0.112244	0.252157	-0.191162	0.221618	0.832847	-0.666078	0.0176402	0.267303
Rab GTPase	GTPase	Rab	ENSG00000167461	RAB8A	RAB8A, member RAS oncogene family [Source:HGNC Symbol;Acc:HGNC:7007]	4218	0.00100814	0.993437	0.487553	-0.0287902	0.623937	0.512858	0.000327117	0.997879	0.610032	0.0557688	0.401287	0.436441	-0.0887964	0.571042	0.877879	0.0542637	0.848914	0.752796
Rab GEFs	GEFs	Rab	ENSG00000183155	RABIF	RAB interacting factor [Source:HGNC Symbol;Acc:HGNC:9797]	5877	0.000867738	0.994287	0.487763	-0.0302768	0.692231	0.535108	0.148404	0.220553	0.297214	0.0357717	0.58652	0.512893	0.273971	0.0820424	0.770751	0.432778	0.131149	0.452465
